# Supplementary material for: Orai3 and Orai1 mediate CRAC channel function and metabolic reprogramming in B cells
Source: eLife. 2023 Feb 21;12:e84708. doi: 10.7554/eLife.84708 (PMC9998091; doi:10.7554/eLife.84708)
Supplement: Figure 1—source data 1. [file elife-84708-fig1-data1.xlsx]

## Sheet: Sheet1
Figure 1A
	Time (minutes)	Unstimulated			IgM			CD40			IgM/CD40			LPS
	1.38205	173.203	184.745	162.795	438.036	449.407	465.604	231.489	231.572	285.17	581.751	561.466	492.392	531.517	466.777	463.124
	9.89387	170.544	176.812	158.473	426.828	442.344	458.306	228.222	230.727	276.99	580.428	559.813	492.145	533.839	459.685	455.539
	18.4047	169.075	176.887	156.086	435.209	447.169	463.131	229.888	234.097	281.281	585.174	568.06	496.043	536.097	461.717	455.162
	27.0168	66.901	69.4141	54.6237	176.097	180.928	173.074	92.0784	94.6215	101.891	220.069	213.586	156.944	192.272	19.8033	165.586
	35.525	67.9083	68.4506	55.4374	183.574	189.608	183.681	95.6386	100.096	102.296	239.055	233	192.357	197.968	31.0383	171.367
	44.0374	69.0754	66.6303	56.7087	200.435	203.085	200.515	94.7862	101.517	101.268	267.279	252.68	218.177	206.127	46.0081	179.194
	52.6532	335.255	280.779	236.589	878.343	831.141	869.585	303.14	408.075	350.427	1042.03	994.39	973.815	788.692	719.695	573.688
	61.1611	398.149	310.216	235.232	1018.23	976	992.216	347.307	449.988	408.534	1158.33	1097.32	1135.08	892.917	818.35	636.079
	69.6734	459.312	349.259	261.727	1051.99	1025.73	1043.87	383.815	499.6	465.608	1224.48	1146.11	1234.6	949.046	902.452	709.272
	78.2784	34.0281	26.5843	30.0686	91.264	87.7276	85.8928	60.2081	54.8678	75.7553	114.384	109.67	82.0382	109.883	-60.751	80.7204
	86.7831	40.2426	31.3083	35.7869	95.0401	94.6857	97.0023	66.8306	63.6899	76.7995	130.837	124.299	99.6408	117.507	-46.706	91.7933
	95.2867	39.5566	35.4962	35.282	92.6251	93.1396	94.9242	65.5384	64.2174	76.2126	127.959	121.231	100.438	114.593	-47.256	90.6186
Figure 1B
		ECAR		OCR
	Unstimulated	27.81	3.47	356.77	99.01
	IgM	87.74	0.66	1040.53	13.45
	CD40	39.01	3.68	449.67	59.51
	Both	116.93	4.34	1201.73	48.43
	LPS	77.76	11.65	853.59	127.14
Figure 1C
	Unstimulated	IgM	CD40	IgM/CD40	LPS
	129.518	342.584	164.349	457.214	421.504
	141.391	354.029	169.88	446.829	508.974
	120.804	368.207	205.069	395.605	364.544
Figure 1D
	Unstim	IgM	CD40	IgM/CD40	LPS
	419.756	959.361	318.277	1096.52	834.453
	313.763	932.587	435.382	1024.88	949.708
	226.446	948.948	389.395	1134.16	618.653
Figure 1E
	Unstim	IgM	CD40	IgM/CD40	LPS
	3201	8700	3820	9177	7657
	3122	8259	3715	8698	7538
	3163	8241	3788	8871	7434
Figure 1F
	Unstim	IgM	CD40	IgM/CD40	LPS
	3028	4798	3565	5426	5483
	2934	4498	3389	5211	5285
	2897	4491	3360	5010	5000
Figure 1G
	Unstim	IgM	CD40	IgM/CD40	LPS
	1.19904	6.35069	1.81731	10.9601	3.52499
	1.12949	3.99553	1.2208	7.31065	2.41239
	2.29121	9.442	2.90548	13.9449	5.71795
Figure 1H
	Unstim	IgM	CD40	IgM/CD40	LPS
	2.74412	1.40848	1.83009	1.74761	1.38525
	2.70673	1.09014	2.49858	0.844079	1.36556
	2.6312	1.28313	2.16619	1.15108	1.35336
Figure 1I
	Unstim	IgM	CD40	IgM/CD40	LPS
	1.23046	1.54849	1.41068	2.55409	2.54133
	0.792074	0.901745	0.834263	1.48745	1.62308
	0.987853	1.4053	1.16365	1.85661	2.35503
