# Supplementary material for: Orai3 and Orai1 mediate CRAC channel function and metabolic reprogramming in B cells
Source: eLife. 2023 Feb 21;12:e84708. doi: 10.7554/eLife.84708 (PMC9998091; doi:10.7554/eLife.84708)
Supplement: Figure 2—source data 1. [file elife-84708-fig2-data1.xlsx]

## Sheet: Sheet1
Figure 2B
	WT A20	Orai1 KO #4	Orai3 KO #2	O1/O3 KO #7
	0.00171265	0	0.00197437	0
	0.00163595	0	0.00201536	0
	0.0016937	0	0.00212406	0
Figure 2C
	WT A20	Orai1 KO #4	Orai3 KO #2	O1/O3 KO #7
	0.000379715	0.000367984	0.000401856	0.000528832
	0.000373107	0.000342355	0.00035962	0.00051121
	0.000374023	0.000358716	0.000347722	0.000528258
Figure 2D
	WT A20	Orai1 KO #4	Orai3 KO #2	O1/O3 KO #7
	0.00492174	0.00478017	0	0
	0.00518607	0.00470935	0	0
	0.00475728	0.00460728	0	0
Figure 2E
	Time (min)	WT A20
	0	0.395011	0.403674	0.514433	0.452667	0.482002	0.483159	0.390196	0.405029	0.386301	0.369962	0.455549	0.814187	0.521562	0.420496	0.437447	0.436766	0.483174	0.441778	0.401363	0.424468	0.406412	0.422556	0.460209	0.460233	0.491962	0.425201	0.398869	0.397956	0.525795	0.44299	0.420916	0.430631	0.38511	0.420173	0.409456	0.437715	0.426103	0.453677	0.498575	0.424145	0.465226	0.440725	0.486697	0.50303	0.40866	0.389488	0.395523	0.407701
	0.029733	0.40153	0.414785	0.522667	0.452236	0.475086	0.484528	0.415717	0.412173	0.401789	0.372886	0.450387	0.821391	0.515137	0.41976	0.422585	0.439582	0.508288	0.450598	0.409478	0.452498	0.393959	0.418565	0.45374	0.457191	0.495611	0.434588	0.401537	0.402472	0.519757	0.450937	0.420609	0.440369	0.380287	0.415734	0.413414	0.440978	0.425993	0.4439	0.498448	0.420605	0.457996	0.449881	0.487147	0.489847	0.412616	0.395125	0.388977	0.402876
	0.06305	0.415059	0.431319	0.515032	0.454231	0.468723	0.483481	0.409459	0.416252	0.402227	0.373372	0.463482	0.817119	0.51642	0.437844	0.438357	0.445088	0.486766	0.447521	0.405049	0.450049	0.396464	0.435059	0.462478	0.467229	0.496971	0.434667	0.404994	0.394335	0.535732	0.450122	0.417817	0.448828	0.384999	0.428254	0.416757	0.443803	0.427911	0.446841	0.503122	0.421304	0.464832	0.446339	0.458066	0.500674	0.42584	0.399001	0.405379	0.390262
	0.096317	0.410189	0.429151	0.498844	0.444111	0.497905	0.485685	0.401135	0.402246	0.40108	0.363963	0.459499	0.817467	0.499793	0.422331	0.419305	0.423589	0.487717	0.453341	0.399327	0.438568	0.394102	0.413853	0.47059	0.464242	0.504044	0.424619	0.405964	0.391565	0.514275	0.445627	0.411941	0.440056	0.391319	0.435847	0.419085	0.437674	0.428481	0.453717	0.496525	0.413266	0.459281	0.427805	0.469821	0.508563	0.416818	0.389619	0.401376	0.397819
	0.12975	0.392369	0.438718	0.500205	0.465486	0.47626	0.483668	0.407876	0.403823	0.41128	0.377721	0.46802	0.79732	0.506877	0.425759	0.429864	0.438427	0.475822	0.45304	0.413387	0.462339	0.396061	0.413113	0.468167	0.467536	0.505347	0.43762	0.397763	0.393967	0.539669	0.449327	0.42476	0.430588	0.38588	0.425789	0.411012	0.436358	0.427909	0.446526	0.494088	0.410378	0.456626	0.450983	0.47802	0.479991	0.413546	0.3841	0.398214	0.3926
	0.163017	0.404628	0.415465	0.513168	0.450215	0.476761	0.473116	0.394499	0.408639	0.417558	0.374358	0.452527	0.78919	0.488853	0.419486	0.41655	0.437071	0.466438	0.444661	0.408398	0.444889	0.399679	0.417842	0.459935	0.470632	0.486435	0.425536	0.401997	0.386643	0.530827	0.451445	0.41973	0.443109	0.380244	0.431157	0.423539	0.449387	0.431615	0.433795	0.481983	0.416866	0.45569	0.451361	0.491947	0.516086	0.394125	0.386431	0.400189	0.382044
	0.1964	0.409098	0.438082	0.50578	0.4548	0.48145	0.477231	0.393744	0.408143	0.407841	0.378618	0.464667	0.798491	0.483602	0.422773	0.4212	0.450346	0.485147	0.446896	0.418741	0.461433	0.401105	0.428933	0.472767	0.479185	0.501691	0.445415	0.410894	0.396696	0.521922	0.447898	0.424526	0.446809	0.378911	0.432365	0.420298	0.442145	0.422511	0.445677	0.48728	0.433456	0.460487	0.451536	0.495865	0.511802	0.400437	0.389961	0.413955	0.387624
	0.229667	0.413544	0.428915	0.50543	0.464435	0.482211	0.487216	0.398582	0.407865	0.409433	0.378607	0.47022	0.780328	0.477152	0.429942	0.436883	0.444505	0.480255	0.442312	0.41313	0.461959	0.394241	0.412783	0.452734	0.472329	0.512957	0.449189	0.409106	0.391458	0.537192	0.449541	0.424577	0.445362	0.385644	0.429555	0.420859	0.449716	0.423958	0.442972	0.485227	0.417641	0.471113	0.460801	0.472452	0.49412	0.416846	0.404565	0.38958	0.389347
	0.263067	0.417741	0.427615	0.505774	0.46487	0.464819	0.481348	0.401821	0.416821	0.402387	0.377127	0.442648	0.770736	0.465409	0.417566	0.412489	0.443009	0.497472	0.4422	0.41174	0.446659	0.387869	0.416214	0.461601	0.467526	0.48759	0.44797	0.40913	0.396749	0.524345	0.432179	0.416879	0.453058	0.387694	0.421647	0.41073	0.444577	0.424363	0.446434	0.494562	0.410129	0.462637	0.458482	0.477636	0.498749	0.425409	0.396638	0.397368	0.402518
	0.296367	0.406548	0.438197	0.509729	0.455591	0.458996	0.48348	0.407526	0.405881	0.407457	0.382349	0.447583	0.762908	0.471248	0.42276	0.419077	0.432355	0.465078	0.443085	0.418545	0.440152	0.398542	0.426056	0.469593	0.46363	0.50329	0.431439	0.407362	0.403939	0.528521	0.441254	0.42789	0.455553	0.378327	0.430255	0.406459	0.452417	0.417432	0.456707	0.491173	0.411997	0.454111	0.423977	0.491359	0.486642	0.427924	0.388342	0.396605	0.384638
	0.329717	0.418096	0.442471	0.500439	0.464414	0.472958	0.474606	0.394179	0.412425	0.415819	0.367217	0.450938	0.75986	0.46711	0.416758	0.429758	0.436088	0.474441	0.436685	0.405955	0.440345	0.388144	0.418753	0.453987	0.47222	0.494589	0.422829	0.407265	0.397003	0.534592	0.4281	0.415356	0.457055	0.385888	0.425252	0.40289	0.440998	0.423581	0.446519	0.474236	0.428305	0.449037	0.445709	0.474889	0.485204	0.405952	0.398833	0.393017	0.377811
	0.363017	0.412277	0.438145	0.504004	0.454801	0.480096	0.482568	0.409662	0.416965	0.403636	0.375307	0.458948	0.765543	0.459693	0.417752	0.422181	0.447336	0.48186	0.445772	0.413682	0.425481	0.391919	0.425001	0.439179	0.469461	0.500079	0.432195	0.418558	0.403614	0.53315	0.432803	0.431005	0.455091	0.385277	0.416767	0.408694	0.434394	0.414245	0.442943	0.489632	0.425728	0.461132	0.446603	0.4544	0.469349	0.398766	0.390153	0.397196	0.372741
	0.396367	0.407329	0.445772	0.522246	0.459493	0.471098	0.472859	0.400129	0.410424	0.419245	0.379175	0.457213	0.753733	0.464364	0.414512	0.422955	0.437487	0.476764	0.450283	0.41015	0.419445	0.407122	0.425277	0.457504	0.46926	0.500152	0.4314	0.41269	0.418235	0.537076	0.444532	0.424167	0.457438	0.389559	0.445907	0.402768	0.448017	0.423101	0.442455	0.485049	0.427473	0.453072	0.433882	0.456928	0.477465	0.419151	0.402619	0.396755	0.382183
	0.429667	0.413674	0.434491	0.503381	0.459767	0.471474	0.474814	0.393595	0.411751	0.41648	0.377875	0.451794	0.756726	0.454648	0.417646	0.4261	0.42884	0.492011	0.452918	0.409965	0.413609	0.394005	0.435693	0.450072	0.472623	0.499752	0.425831	0.420452	0.417537	0.536493	0.432385	0.42545	0.438363	0.384244	0.436534	0.405282	0.427277	0.421642	0.451185	0.486485	0.430937	0.447701	0.433425	0.444789	0.477072	0.396876	0.386527	0.40214	0.386087
	0.463033	0.399235	0.430231	0.492258	0.452826	0.470901	0.477288	0.393804	0.400126	0.405981	0.370238	0.457587	0.751827	0.454029	0.414163	0.41634	0.437968	0.476681	0.440536	0.40357	0.412083	0.372109	0.430073	0.460073	0.466885	0.506662	0.421726	0.409436	0.41979	0.529033	0.434343	0.421832	0.451068	0.3717	0.420502	0.419533	0.425063	0.426261	0.430799	0.484966	0.429461	0.446749	0.433729	0.443874	0.48835	0.403861	0.389868	0.401713	0.389851
	0.4963	0.401129	0.438223	0.514005	0.462138	0.490545	0.494609	0.39453	0.401722	0.410058	0.372794	0.447963	0.771314	0.454183	0.410842	0.420317	0.429721	0.469831	0.456848	0.405586	0.408209	0.378332	0.423161	0.457261	0.482615	0.509887	0.437217	0.414264	0.433367	0.533829	0.444072	0.41942	0.462846	0.377114	0.41994	0.411203	0.427341	0.427789	0.453569	0.485966	0.434783	0.459478	0.440061	0.451754	0.461457	0.405433	0.38939	0.406648	0.395634
	0.529717	0.408461	0.420623	0.514092	0.449181	0.467179	0.477546	0.394427	0.399806	0.406563	0.368313	0.455485	0.752256	0.448627	0.413873	0.426544	0.435765	0.471834	0.445045	0.404261	0.408538	0.396119	0.428458	0.453102	0.464999	0.505249	0.417883	0.404384	0.488458	0.537059	0.441652	0.421739	0.459801	0.381956	0.43362	0.422243	0.43625	0.432506	0.445052	0.497906	0.422485	0.451695	0.427362	0.438987	0.478147	0.41535	0.36832	0.405046	0.398663
	0.562967	0.411165	0.432539	0.498949	0.450102	0.472987	0.484208	0.38474	0.399749	0.411298	0.378339	0.453437	0.759696	0.453196	0.419268	0.415494	0.438257	0.464207	0.44417	0.409979	0.414333	0.388513	0.421732	0.445776	0.473331	0.509393	0.434037	0.407149	0.547472	0.526184	0.445917	0.421741	0.44836	0.374396	0.430517	0.412911	0.423777	0.411011	0.444231	0.487047	0.425744	0.441359	0.429755	0.441362	0.485526	0.411835	0.390703	0.403337	0.378351
	0.59635	0.409841	0.423953	0.499144	0.459157	0.498212	0.484235	0.413533	0.400537	0.404969	0.377287	0.456924	0.74752	0.448769	0.412278	0.422451	0.437169	0.486704	0.453612	0.40324	0.418168	0.390476	0.426343	0.448251	0.478098	0.51676	0.43293	0.406021	0.772599	0.52191	0.435871	0.421349	0.458279	0.385618	0.424405	0.411367	0.432074	0.421772	0.450643	0.4954	0.428678	0.4499	0.43076	0.444779	0.46615	0.396955	0.386276	0.395822	0.386024
	0.6297	0.407771	0.44109	0.508902	0.460083	0.472664	0.485663	0.403748	0.410678	0.407481	0.37428	0.458647	0.734098	0.456082	0.414714	0.409051	0.443034	0.478519	0.448868	0.404084	0.407444	0.403293	0.425609	0.449161	0.48392	0.52805	0.428674	0.409573	0.840697	0.540451	0.444054	0.414677	0.462484	0.394707	0.439051	0.420662	0.431666	0.413028	0.457346	0.505635	0.436694	0.449838	0.45408	0.439268	0.468806	0.416771	0.387854	0.405427	0.38632
	0.663017	0.407489	0.435898	0.509215	0.454565	0.479238	0.483818	0.38081	0.405759	0.408002	0.368099	0.465672	0.720275	0.45389	0.415946	0.409181	0.432372	0.476664	0.45259	0.412867	0.408721	0.379368	0.433095	0.457317	0.461579	0.505934	0.436933	0.396773	0.776018	0.52041	0.445435	0.42006	0.458702	0.380101	0.443358	0.414825	0.43579	0.416879	0.456097	0.503726	0.43603	0.442489	0.439302	0.428319	0.466617	0.418612	0.394289	0.404621	0.375771
	0.69635	0.41702	0.434925	0.507521	0.451481	0.494965	0.483496	0.387311	0.408516	0.40125	0.371016	0.452672	0.724584	0.445661	0.415719	0.423671	0.433529	0.474559	0.449425	0.407879	0.415253	0.384951	0.421802	0.435287	0.467101	0.502648	0.427186	0.403208	0.693085	0.524314	0.429864	0.413997	0.461964	0.377152	0.433319	0.410385	0.43542	0.417863	0.454392	0.49597	0.433139	0.450111	0.446186	0.432318	0.461154	0.401878	0.388779	0.399905	0.386412
	0.729683	0.401123	0.43335	0.503452	0.462668	0.499243	0.474249	0.402359	0.399379	0.413903	0.373761	0.471435	0.717367	0.453084	0.418063	0.421653	0.436624	0.472139	0.445498	0.411292	0.400407	0.390675	0.417293	0.440604	0.481296	0.510321	0.429915	0.402054	0.608969	0.533651	0.445633	0.418142	0.446911	0.383666	0.430983	0.413656	0.436784	0.414358	0.465853	0.494861	0.412805	0.447148	0.442153	0.436281	0.46634	0.413971	0.405769	0.40777	0.361633
	0.763033	0.41031	0.432459	0.520227	0.450327	0.47822	0.47852	0.398599	0.407277	0.406379	0.37221	0.462358	0.727454	0.441989	0.413991	0.427447	0.4429	0.463048	0.439235	0.406967	0.41474	0.39683	0.424456	0.450743	0.475891	0.49783	0.432213	0.407314	0.544663	0.539007	0.435765	0.425057	0.455182	0.391163	0.419186	0.413594	0.426536	0.4169	0.450841	0.493169	0.42731	0.446169	0.443882	0.431697	0.472821	0.397923	0.396488	0.419582	0.384308
	0.796367	0.409107	0.427519	0.500453	0.450183	0.484651	0.464713	0.387611	0.401892	0.410717	0.366678	0.461712	0.714022	0.453442	0.410583	0.416735	0.426808	0.456916	0.447383	0.407265	0.401665	0.395672	0.405385	0.429145	0.460116	0.491634	0.402773	0.417215	0.506987	0.534809	0.439493	0.415877	0.454281	0.385064	0.436303	0.413099	0.416331	0.406099	0.439905	0.483797	0.425134	0.434447	0.444954	0.423124	0.470129	0.415685	0.397284	0.400201	0.386045
	0.8297	0.419625	0.445355	0.545749	0.47199	0.411546	0.518026	0.433973	0.415981	0.432114	0.407216	0.493025	0.725473	0.46152	0.40965	0.421033	0.430395	0.420446	0.463355	0.404687	0.404801	0.390025	0.404294	0.383852	0.393722	0.397522	0.352658	0.402365	0.432833	0.442798	0.42852	0.386846	0.396531	0.323524	0.456057	0.438709	0.412783	0.334495	0.326563	0.398899	0.462683	0.388075	0.432223	0.428752	0.424742	0.370167	0.297721	0.293728	0.302909
	0.863017	0.419625	0.445355	0.545749	0.47199	0.411546	0.518026	0.433973	0.415981	0.432114	0.407216	0.493025	0.725473	0.46152	0.40965	0.421033	0.430395	0.420446	0.463355	0.404687	0.404801	0.390025	0.404294	0.383852	0.393722	0.397522	0.352658	0.402365	0.432833	0.442798	0.42852	0.386846	0.396531	0.323524	0.456057	0.438709	0.412783	0.334495	0.326563	0.398899	0.462683	0.388075	0.432223	0.428752	0.424742	0.370167	0.297721	0.293728	0.302909
	0.896367	0.408954	0.412436	0.489476	0.464026	0.441378	0.467718	0.403692	0.39072	0.398298	0.360566	0.456354	0.73117	0.453169	0.40129	0.42734	0.448448	0.445976	0.438902	0.40401	0.394665	0.38332	0.420396	0.43702	0.460372	0.482244	0.419169	0.417471	0.427929	0.520956	0.428277	0.414857	0.436964	0.379069	0.427391	0.419223	0.429645	0.412542	0.43469	0.472203	0.445235	0.43954	0.448169	0.420705	0.472743	0.420029	0.393082	0.397653	0.369721
	0.9297	0.408954	0.412436	0.489476	0.464026	0.441378	0.467718	0.403692	0.39072	0.398298	0.360566	0.456354	0.73117	0.453169	0.40129	0.42734	0.448448	0.445976	0.438902	0.40401	0.394665	0.38332	0.420396	0.43702	0.460372	0.482244	0.419169	0.417471	0.427929	0.520956	0.428277	0.414857	0.436964	0.379069	0.427391	0.419223	0.429645	0.412542	0.43469	0.472203	0.445235	0.43954	0.448169	0.420705	0.472743	0.420029	0.393082	0.397653	0.369721
	0.963017	0.420868	0.420082	0.497113	0.473095	0.460077	0.484676	0.405007	0.396915	0.417048	0.396891	0.475836	0.724846	0.446853	0.402858	0.421434	0.446983	0.465353	0.448823	0.420416	0.415852	0.393118	0.421104	0.453822	0.475139	0.495139	0.412275	0.440767	0.404995	0.527612	0.435499	0.412198	0.465889	0.394107	0.45746	0.460613	0.446973	0.425091	0.437703	0.47918	0.43232	0.447093	0.435595	0.433374	0.462705	0.434447	0.415933	0.404103	0.384424
	0.99635	0.408698	0.413057	0.49086	0.463855	0.475107	0.483664	0.396336	0.394579	0.394345	0.373988	0.45527	0.715067	0.444077	0.403556	0.427009	0.441848	0.446176	0.44108	0.399813	0.395833	0.389165	0.411782	0.44472	0.461642	0.496303	0.408552	0.431798	0.412118	0.524702	0.431976	0.415737	0.453671	0.38058	0.426405	0.429742	0.435244	0.403444	0.434382	0.496606	0.433956	0.447629	0.43369	0.416384	0.467064	0.41682	0.392853	0.397282	0.373063
	1.02972	0.405064	0.416043	0.492717	0.460875	0.459995	0.477131	0.398204	0.382542	0.399509	0.376003	0.459674	0.710962	0.443431	0.412087	0.422338	0.415986	0.438928	0.435573	0.404698	0.399213	0.402398	0.415573	0.442469	0.456149	0.4839	0.413462	0.427262	0.402902	0.518004	0.430107	0.419027	0.446838	0.381023	0.41746	0.432899	0.439829	0.405069	0.437922	0.481922	0.41171	0.445386	0.427516	0.41911	0.456459	0.405204	0.386679	0.395052	0.355026
	1.06302	0.399742	0.40828	0.484213	0.462987	0.455623	0.470833	0.389385	0.390227	0.404748	0.362595	0.464089	0.694131	0.446794	0.40496	0.417346	0.416434	0.437579	0.426389	0.404395	0.407146	0.398921	0.421971	0.428692	0.444531	0.497133	0.409115	0.42759	0.389847	0.51178	0.429045	0.42194	0.449887	0.379918	0.428904	0.439319	0.434826	0.414335	0.428907	0.492654	0.423251	0.455515	0.444513	0.433167	0.485627	0.402917	0.375808	0.402364	0.362
	1.09637	0.412053	0.4184	0.489438	0.464061	0.453557	0.472382	0.398654	0.378521	0.392677	0.370531	0.460675	0.681645	0.457163	0.4093	0.435332	0.43722	0.448809	0.429859	0.416376	0.399562	0.410588	0.422132	0.438588	0.45907	0.497244	0.419077	0.442351	0.394239	0.533834	0.433889	0.41972	0.447454	0.382211	0.429782	0.438799	0.430322	0.410534	0.427516	0.490457	0.430891	0.457265	0.432008	0.435962	0.479759	0.408463	0.375943	0.38375	0.37926
	1.1297	0.394979	0.408864	0.486987	0.45634	0.467558	0.477565	0.393606	0.396358	0.398765	0.367495	0.45488	0.675173	0.446905	0.413174	0.436775	0.434912	0.453889	0.43312	0.397247	0.387225	0.389424	0.414602	0.443874	0.466836	0.490313	0.410348	0.440823	0.388901	0.540314	0.428161	0.419487	0.458575	0.379447	0.43287	0.437295	0.433934	0.418441	0.42491	0.49409	0.420398	0.453044	0.454663	0.426589	0.498765	0.40537	0.376764	0.396085	0.367862
	1.163	0.400979	0.406502	0.498256	0.449807	0.45449	0.472754	0.397255	0.386454	0.394458	0.361726	0.464356	0.666962	0.44394	0.407145	0.430511	0.43529	0.447402	0.440055	0.399629	0.3909	0.367333	0.409148	0.440691	0.446601	0.478343	0.414275	0.436772	0.39348	0.528778	0.422388	0.405741	0.44264	0.381318	0.427554	0.41836	0.424566	0.421326	0.433526	0.486018	0.414269	0.446774	0.450968	0.422661	0.473622	0.417053	0.379319	0.395199	0.354951
	1.19637	0.410106	0.41104	0.501909	0.46312	0.437279	0.469808	0.387531	0.392944	0.39184	0.372437	0.463987	0.661243	0.453962	0.413371	0.439694	0.436359	0.451023	0.442914	0.406936	0.389346	0.385481	0.417572	0.442099	0.45419	0.486858	0.42895	0.44086	0.393459	0.517963	0.421961	0.42918	0.442304	0.386794	0.413632	0.400973	0.436538	0.41709	0.435481	0.495045	0.406915	0.453203	0.4351	0.419284	0.455671	0.401447	0.384269	0.400476	0.376243
	1.22968	0.407248	0.413083	0.499165	0.464469	0.455003	0.469802	0.393211	0.388095	0.393183	0.370889	0.470187	0.686034	0.455432	0.407325	0.441268	0.443191	0.459281	0.450642	0.410103	0.39255	0.39404	0.429892	0.448569	0.450083	0.490068	0.421489	0.430788	0.395164	0.524587	0.421085	0.429269	0.44004	0.397196	0.440417	0.420368	0.439899	0.421378	0.439746	0.495902	0.419615	0.444416	0.429013	0.432466	0.471673	0.399737	0.383353	0.394736	0.374827
	1.26303	0.395509	0.418857	0.495002	0.460038	0.448254	0.474832	0.388152	0.384296	0.393933	0.371852	0.465245	0.650096	0.460168	0.405079	0.417816	0.424703	0.437757	0.424774	0.404962	0.389511	0.386917	0.426593	0.430801	0.452911	0.468348	0.411931	0.425554	0.392443	0.519284	0.419496	0.419348	0.446529	0.401708	0.424248	0.416156	0.426572	0.419292	0.433362	0.475168	0.403084	0.438122	0.426571	0.417958	0.472467	0.392818	0.384871	0.402869	0.38751
	1.29637	0.398374	0.416321	0.505426	0.457677	0.449507	0.472476	0.395175	0.384335	0.389099	0.364465	0.459929	0.65365	0.459649	0.413737	0.419182	0.440574	0.457525	0.452263	0.39381	0.380193	0.378992	0.436577	0.432972	0.445522	0.477545	0.415612	0.429489	0.391766	0.509084	0.415458	0.426133	0.432556	0.396007	0.427774	0.409555	0.433382	0.417177	0.429855	0.502434	0.403893	0.445775	0.435428	0.418285	0.473557	0.401443	0.375701	0.398771	0.380327
	1.32963	0.401681	0.412072	0.499113	0.45754	0.465927	0.465035	0.391448	0.386618	0.395818	0.373442	0.450209	0.653608	0.460956	0.402132	0.429437	0.438307	0.456545	0.444014	0.406788	0.389537	0.388927	0.431892	0.438333	0.440707	0.481959	0.424586	0.431852	0.400933	0.534377	0.414442	0.421644	0.447306	0.396684	0.439116	0.40739	0.430426	0.418262	0.438308	0.492087	0.413592	0.444332	0.43193	0.425299	0.509322	0.396472	0.38465	0.405652	0.381849
	1.36303	0.402761	0.40409	0.504286	0.453964	0.503033	0.465559	0.391016	0.382189	0.394643	0.366022	0.469295	0.644703	0.463249	0.40118	0.450659	0.445557	0.456242	0.436857	0.408707	0.381847	0.380801	0.42619	0.447917	0.456081	0.477023	0.409196	0.422601	0.39939	0.525387	0.420064	0.417376	0.443763	0.381549	0.434882	0.415417	0.430533	0.414552	0.444763	0.487374	0.429981	0.448185	0.447117	0.424338	0.479161	0.396206	0.392603	0.405548	0.390605
	1.39633	0.404597	0.419973	0.509064	0.469397	0.51279	0.46445	0.382993	0.392087	0.382315	0.371161	0.45424	0.644235	0.456213	0.412843	0.444392	0.419808	0.445438	0.43648	0.40688	0.390116	0.385957	0.431443	0.460551	0.446984	0.485853	0.409835	0.41573	0.392257	0.519928	0.426537	0.423418	0.433524	0.396079	0.434171	0.403139	0.417415	0.414489	0.437472	0.485462	0.421517	0.437916	0.431924	0.423862	0.475787	0.394296	0.386041	0.404603	0.390812
	1.4297	0.40269	0.407306	0.502418	0.449131	0.507737	0.450788	0.39495	0.387379	0.389056	0.360564	0.463472	0.637372	0.443913	0.397115	0.449396	0.42926	0.453413	0.439939	0.406966	0.3855	0.382181	0.432088	0.467293	0.448551	0.471884	0.406633	0.427301	0.398939	0.52879	0.425308	0.417343	0.43949	0.388222	0.437364	0.424967	0.424162	0.420862	0.425918	0.477992	0.421726	0.43881	0.43053	0.431103	0.468176	0.402754	0.386211	0.401406	0.369977
	1.46303	0.406011	0.404114	0.499586	0.457839	0.494756	0.458669	0.395432	0.393354	0.392429	0.372682	0.467751	0.649732	0.450936	0.410934	0.494894	0.445699	0.458847	0.419671	0.399386	0.384851	0.370322	0.423695	0.452225	0.444159	0.475225	0.407769	0.429852	0.404295	0.523378	0.425005	0.419771	0.444377	0.376283	0.451681	0.398557	0.418822	0.417153	0.424215	0.476231	0.426425	0.45155	0.421997	0.437577	0.474233	0.405404	0.386919	0.409131	0.38941
	1.49638	0.416023	0.414413	0.50215	0.452015	0.496943	0.465662	0.39485	0.387906	0.386983	0.379637	0.462184	0.637631	0.456063	0.410842	0.528857	0.443157	0.474713	0.42592	0.402683	0.385209	0.382553	0.417922	0.442107	0.450089	0.480973	0.407294	0.434564	0.388247	0.529065	0.427732	0.420858	0.433649	0.377892	0.433584	0.404865	0.41882	0.419328	0.434102	0.484812	0.430765	0.440222	0.425856	0.424686	0.474372	0.395609	0.382424	0.405087	0.377075
	1.52967	0.396598	0.406176	0.495173	0.446327	0.482557	0.463413	0.407216	0.386909	0.403263	0.37107	0.466147	0.652959	0.449084	0.415753	0.654741	0.442754	0.471153	0.436597	0.402137	0.394977	0.379413	0.440293	0.457359	0.452374	0.468768	0.414854	0.470053	0.397567	0.524491	0.423616	0.432471	0.445629	0.38183	0.420299	0.420083	0.419956	0.419834	0.453954	0.483385	0.426703	0.446203	0.432298	0.428676	0.470435	0.408285	0.389999	0.416946	0.376554
	1.56302	0.411115	0.406111	0.491056	0.445122	0.471221	0.458003	0.405191	0.388642	0.404088	0.385768	0.4697	0.630065	0.454389	0.416993	0.765607	0.43461	0.487557	0.435806	0.407519	0.39088	0.390534	0.434611	0.43748	0.468728	0.483597	0.413553	0.510844	0.408069	0.518022	0.42224	0.441524	0.433871	0.390039	0.424944	0.412461	0.42297	0.417466	0.447824	0.481373	0.429414	0.450822	0.434623	0.448634	0.480179	0.395102	0.382438	0.414026	0.39377
	1.59635	0.397352	0.407287	0.499305	0.444924	0.455127	0.459114	0.394844	0.395044	0.39468	0.36729	0.459774	0.625307	0.449726	0.418171	0.788238	0.42933	0.477033	0.441907	0.401716	0.396835	0.37827	0.418751	0.437739	0.452043	0.485617	0.401344	0.63075	0.393267	0.512175	0.422502	0.443634	0.435036	0.3807	0.424412	0.406158	0.42036	0.402214	0.44223	0.46921	0.417052	0.437554	0.432656	0.436732	0.463136	0.410854	0.387551	0.412257	0.367576
	1.6297	0.41224	0.401873	0.497022	0.441848	0.467565	0.459097	0.389414	0.390937	0.385832	0.372013	0.465385	0.602055	0.447517	0.419825	0.790267	0.451324	0.487934	0.438439	0.391393	0.39137	0.375067	0.419182	0.449247	0.449245	0.473614	0.412997	0.758639	0.38701	0.512013	0.413801	0.481566	0.443653	0.374597	0.420419	0.408797	0.431463	0.409741	0.460858	0.475676	0.409847	0.442689	0.43695	0.440666	0.461109	0.40022	0.381359	0.405078	0.380206
	1.663	0.41875	0.409906	0.49113	0.43728	0.460026	0.461438	0.406588	0.388906	0.384245	0.383801	0.469461	0.615531	0.445809	0.421692	0.742461	0.424865	0.472549	0.43537	0.400698	0.39797	0.38196	0.438633	0.442279	0.45128	0.486157	0.416555	0.867945	0.388511	0.525637	0.421321	0.496286	0.454874	0.387251	0.412884	0.41995	0.429451	0.416162	0.469318	0.475449	0.429893	0.436884	0.430288	0.430106	0.477724	0.40048	0.381651	0.40407	0.38571
	1.69638	0.428128	0.401218	0.498431	0.446521	0.480989	0.458588	0.400232	0.392252	0.394774	0.386083	0.459455	0.609304	0.444338	0.424997	0.66647	0.437642	0.484218	0.439573	0.400751	0.393775	0.361238	0.437386	0.439194	0.452003	0.466982	0.420658	0.828291	0.38702	0.532552	0.432852	0.534135	0.446033	0.373471	0.415957	0.410068	0.425283	0.409763	0.454772	0.465418	0.410229	0.449318	0.430503	0.428278	0.480633	0.411521	0.395717	0.404516	0.384469
	1.72968	0.418857	0.394167	0.503952	0.449156	0.487415	0.45602	0.404367	0.396049	0.386077	0.37055	0.480174	0.609433	0.442619	0.421834	0.591403	0.429752	0.480498	0.445547	0.401561	0.405767	0.378033	0.416899	0.453775	0.455916	0.47563	0.425014	0.816195	0.374492	0.524079	0.418564	0.645759	0.455285	0.378711	0.431785	0.415042	0.4116	0.421665	0.467021	0.481597	0.420714	0.444698	0.430419	0.445928	0.47128	0.390547	0.386938	0.407658	0.391704
	1.76303	0.406267	0.396099	0.502007	0.439557	0.486582	0.45618	0.398233	0.385731	0.384865	0.369662	0.462892	0.601303	0.440228	0.415817	0.527852	0.420036	0.482618	0.438259	0.393847	0.40944	0.372504	0.423347	0.440278	0.441893	0.468323	0.414868	0.734897	0.387745	0.536758	0.417897	0.808497	0.451092	0.380596	0.420406	0.399498	0.423051	0.41629	0.444996	0.464539	0.416033	0.425874	0.429931	0.427076	0.499763	0.386804	0.370754	0.400848	0.377714
	1.79638	0.408826	0.400977	0.501361	0.447516	0.50001	0.456657	0.391022	0.386668	0.392127	0.360746	0.471326	0.593721	0.443551	0.415552	0.474547	0.424969	0.481885	0.429536	0.40033	0.409974	0.366811	0.40998	0.430717	0.446069	0.4792	0.40912	0.652016	0.383781	0.521867	0.428267	0.815293	0.463313	0.377612	0.426972	0.409015	0.413247	0.426385	0.442651	0.468639	0.395882	0.436895	0.426687	0.422384	0.495935	0.393059	0.374001	0.397404	0.39625
	1.82973	0.406973	0.408337	0.500689	0.452368	0.499142	0.451864	0.403617	0.385565	0.39368	0.365781	0.483634	0.588789	0.445936	0.429313	0.457451	0.433708	0.486803	0.427258	0.41365	0.412609	0.383336	0.433082	0.438437	0.449338	0.471686	0.424662	0.57852	0.383655	0.535024	0.432488	0.783645	0.441697	0.378486	0.442412	0.403835	0.424256	0.422961	0.447444	0.473405	0.426699	0.435052	0.437992	0.441122	0.503012	0.395196	0.39553	0.407941	0.400253
	1.86303	0.397159	0.401175	0.515162	0.450664	0.506879	0.461516	0.394601	0.381995	0.393116	0.381208	0.465163	0.584879	0.452976	0.417571	0.445759	0.436482	0.49569	0.439955	0.404527	0.40846	0.366919	0.432966	0.423912	0.456876	0.470206	0.424893	0.525639	0.379291	0.528406	0.434452	0.680543	0.470057	0.396075	0.422393	0.401408	0.425435	0.418041	0.437629	0.476907	0.430232	0.439064	0.425911	0.432908	0.508017	0.402571	0.39092	0.406633	0.395944
	1.89638	0.39993	0.394899	0.521734	0.456841	0.493868	0.479187	0.395558	0.382724	0.386531	0.370139	0.492332	0.584178	0.444524	0.418582	0.420076	0.435584	0.493168	0.4388	0.40745	0.399329	0.380309	0.416578	0.426084	0.450854	0.47755	0.414268	0.480347	0.383147	0.522866	0.431723	0.591317	0.454477	0.388702	0.429807	0.425141	0.425665	0.415302	0.435449	0.467057	0.401348	0.43379	0.425607	0.418078	0.491418	0.394592	0.384555	0.397114	0.381652
	1.9297	0.400515	0.397166	0.489743	0.44244	0.459313	0.455399	0.396053	0.385028	0.383402	0.368806	0.455079	0.549069	0.435577	0.416676	0.423342	0.399781	0.476001	0.42559	0.396488	0.395299	0.377429	0.410755	0.426145	0.433844	0.464178	0.407819	0.439795	0.400462	0.524664	0.426329	0.549344	0.449366	0.383708	0.419881	0.396763	0.403627	0.414778	0.425146	0.452448	0.414034	0.438167	0.438384	0.437044	0.502659	0.394123	0.382193	0.390077	0.386904
	1.96305	0.402536	0.395518	0.487953	0.440399	0.462138	0.457373	0.395152	0.378321	0.389353	0.362296	0.4675	0.553397	0.447702	0.423291	0.398115	0.41676	0.491374	0.424566	0.400877	0.400149	0.375728	0.411067	0.43301	0.446444	0.468801	0.398139	0.433085	0.388332	0.514961	0.42164	0.49616	0.442834	0.39437	0.410583	0.404657	0.41649	0.409864	0.425094	0.453158	0.406402	0.440339	0.432353	0.430951	0.481702	0.38261	0.379815	0.386073	0.38513
	1.99638	0.427525	0.420567	0.515552	0.470944	0.478427	0.475836	0.406195	0.385629	0.40455	0.386259	0.498125	0.573822	0.454027	0.42998	0.417517	0.437798	0.511229	0.446445	0.416884	0.411452	0.385952	0.434567	0.440461	0.466114	0.467702	0.419778	0.428225	0.406518	0.554794	0.435418	0.482962	0.472896	0.393688	0.413675	0.417167	0.430703	0.437551	0.452186	0.476264	0.432602	0.451369	0.453902	0.447381	0.512734	0.401291	0.397894	0.404209	0.383262
	2.0297	0.465745	0.427433	0.524351	0.487131	0.499392	0.506713	0.426716	0.404055	0.41875	0.403907	0.517186	0.613844	0.4653	0.437718	0.442934	0.448002	0.527868	0.451789	0.453926	0.425337	0.423661	0.49046	0.472874	0.500301	0.489455	0.444472	0.434627	0.430803	0.544023	0.44658	0.475374	0.476917	0.414287	0.4422	0.44875	0.455985	0.455187	0.465414	0.488634	0.491747	0.461881	0.495476	0.475999	0.536334	0.399906	0.410394	0.419291	0.405273
	2.063	0.540834	0.450286	0.544644	0.525692	0.523962	0.51941	0.438302	0.426783	0.470921	0.416532	0.534429	0.623283	0.487957	0.467067	0.460784	0.462066	0.547163	0.482731	0.485867	0.455736	0.420464	0.513624	0.495641	0.50598	0.504394	0.476814	0.445955	0.485665	0.578045	0.464653	0.501906	0.512096	0.445772	0.471013	0.464361	0.461961	0.491874	0.478811	0.507111	0.594531	0.486435	0.498885	0.495775	0.617723	0.401887	0.442191	0.454335	0.423806
	2.09635	0.648753	0.485033	0.585368	0.573209	0.612694	0.557246	0.482045	0.460327	0.509115	0.445424	0.56582	0.655564	0.511156	0.493307	0.477963	0.504319	0.591671	0.496748	0.510855	0.514019	0.445562	0.577285	0.541702	0.5684	0.537448	0.525333	0.47015	0.609833	0.615052	0.502433	0.515073	0.56431	0.46403	0.540974	0.503016	0.490046	0.536843	0.503193	0.526017	0.712828	0.502947	0.548515	0.547963	0.627344	0.442991	0.454483	0.460263	0.46022
	2.1297	0.839024	0.530612	0.620527	0.612435	0.683523	0.604426	0.542509	0.497956	0.554144	0.476327	0.591158	0.701281	0.540465	0.527051	0.537772	0.533635	0.631414	0.540138	0.56249	0.602743	0.468763	0.662307	0.591722	0.600325	0.55947	0.549103	0.502083	0.800112	0.663681	0.556869	0.538891	0.606083	0.521227	0.628331	0.56234	0.524969	0.591882	0.551794	0.565411	0.844732	0.525009	0.609061	0.595517	0.669801	0.456755	0.489181	0.49376	0.499718
	2.16302	0.995082	0.549633	0.657061	0.666906	0.774523	0.667405	0.628853	0.531984	0.604257	0.492761	0.618575	0.728924	0.595829	0.5729	0.602711	0.569218	0.672178	0.58045	0.607972	0.748958	0.527296	0.789599	0.642638	0.636018	0.591493	0.617116	0.540434	0.882071	0.701215	0.632987	0.576877	0.732836	0.536833	0.724352	0.643139	0.550196	0.634486	0.584669	0.583993	0.934795	0.578258	0.688339	0.665247	0.722439	0.472071	0.512365	0.518556	0.520573
	2.19635	1.05188	0.573949	0.712279	0.742661	0.880513	0.711667	0.788558	0.583138	0.629001	0.537266	0.650028	0.77041	0.671613	0.627997	0.627323	0.596184	0.726656	0.625177	0.623513	0.99168	0.530537	0.887811	0.70807	0.715395	0.626236	0.636111	0.571853	0.899955	0.745914	0.713403	0.603331	0.822831	0.569801	0.764617	0.732422	0.591879	0.714295	0.613512	0.632136	0.994815	0.598603	0.735583	0.714611	0.783056	0.493459	0.571986	0.560167	0.576713
	2.22965	1.06819	0.624772	0.724836	0.777195	0.995188	0.757792	0.916976	0.634424	0.69058	0.576091	0.677617	0.784509	0.729775	0.651181	0.714983	0.650766	0.768107	0.635761	0.655853	1.06933	0.548791	0.943489	0.775318	0.77368	0.672998	0.687099	0.587678	0.913802	0.78914	0.751206	0.622722	0.823379	0.606192	0.80212	0.811984	0.606896	0.778438	0.649728	0.654815	1.0153	0.608951	0.813587	0.763291	0.843415	0.522953	0.59065	0.588874	0.602462
	2.26302	1.09266	0.673837	0.751451	0.838411	1.00877	0.796204	0.96516	0.680946	0.716479	0.609581	0.717402	0.809796	0.776224	0.697707	0.723214	0.72056	0.856495	0.667193	0.681875	1.06993	0.572686	0.995184	0.816036	0.818476	0.692574	0.73081	0.623943	0.914602	0.824766	0.798538	0.671012	0.880425	0.652169	0.808494	0.854933	0.662121	0.829692	0.667725	0.704851	1.04214	0.641974	0.867479	0.827334	0.899664	0.546292	0.605965	0.620102	0.637725
	2.29632	1.11214	0.703534	0.767456	0.856552	0.985056	0.836043	0.999974	0.719914	0.71544	0.628433	0.736771	0.846996	0.785997	0.72476	0.76542	0.79539	0.905008	0.699515	0.708341	1.08616	0.617066	1.01963	0.849145	0.849135	0.720728	0.744576	0.633698	0.90242	0.871807	0.809371	0.688481	0.862524	0.703681	0.865897	0.901459	0.703127	0.839268	0.733558	0.729613	1.04789	0.687549	0.861324	0.823925	0.889205	0.553783	0.631698	0.620275	0.64006
	2.32965	1.14155	0.733221	0.81788	0.888323	1.02534	0.84708	0.978084	0.754082	0.715092	0.660561	0.737959	0.867839	0.803569	0.781114	0.771941	0.806274	0.93226	0.730213	0.730511	1.0975	0.62154	1.02744	0.848614	0.857958	0.752429	0.754323	0.651536	0.906266	0.92177	0.802364	0.732768	0.87741	0.736032	0.886237	0.900299	0.721032	0.857841	0.724475	0.74876	0.98976	0.687325	0.910942	0.877763	0.925789	0.57539	0.687875	0.649742	0.724755
	2.36303	1.08875	0.771128	0.823897	0.932266	1.05761	0.888107	0.992913	0.749778	0.713999	0.664681	0.782644	0.888138	0.802142	0.797006	0.769237	0.864689	0.955599	0.745166	0.75458	1.10727	0.6391	1.01579	0.866686	0.910435	0.786133	0.800256	0.689583	0.891485	0.910701	0.798822	0.737906	0.821621	0.770758	0.848682	0.900378	0.749088	0.887236	0.729392	0.760199	0.967305	0.706131	0.894696	0.857182	1.01301	0.580079	0.702787	0.662341	0.702054
	2.39638	1.11149	0.765596	0.813381	0.957835	1.0793	0.907426	1.01453	0.794915	0.716231	0.70921	0.814619	0.911631	0.826597	0.801377	0.780372	0.923086	0.976614	0.757312	0.767857	1.10337	0.659998	1.04651	0.902917	0.928446	0.838108	0.833602	0.719164	0.892553	0.932351	0.815089	0.75532	0.835457	0.799976	0.886961	0.931761	0.753459	0.895639	0.726383	0.792494	0.934257	0.72542	0.947802	0.896503	0.981959	0.61653	0.716167	0.680125	0.691696
	2.42963	1.08463	0.782899	0.856833	0.956945	1.10421	0.900202	0.997044	0.767054	0.715682	0.699258	0.838636	0.909977	0.841972	0.828618	0.809699	0.919004	0.981887	0.756118	0.781266	1.06502	0.67517	1.02871	0.877924	0.919154	0.872616	0.792565	0.747277	0.887952	0.966785	0.809807	0.770503	0.848065	0.76181	0.903075	0.903007	0.779361	0.876517	0.713255	0.785101	0.926098	0.743997	0.960399	0.910367	1.02101	0.614993	0.757514	0.687974	0.73629
	2.46298	1.07611	0.780931	0.865523	1.00733	1.09845	0.914056	0.966537	0.777042	0.728347	0.689687	0.852321	0.929553	0.858235	0.850806	0.797426	0.916733	1.01814	0.774045	0.805481	1.04546	0.706784	1.03973	0.927125	0.935503	0.883871	0.838349	0.777639	0.882643	0.961341	0.810337	0.771261	0.834231	0.803502	0.902552	0.908909	0.785084	0.906297	0.708282	0.801779	0.911235	0.759329	0.958863	0.935205	1.02158	0.63148	0.771896	0.70678	0.753829
	2.49635	1.05637	0.795288	0.875355	1.04717	1.09942	0.961252	1.00331	0.773951	0.7311	0.707692	0.868858	0.951811	0.858076	0.848038	0.818971	0.937398	1.04314	0.785106	0.814299	1.05609	0.723533	1.02994	0.930826	0.948582	0.927997	0.8231	0.781828	0.892487	0.974744	0.798288	0.79648	0.814076	0.797986	0.878651	0.9002	0.815605	0.955319	0.74168	0.802776	0.915409	0.778859	0.974383	0.937134	1.01764	0.614505	0.785363	0.71789	0.7699
	2.52963	1.03881	0.792457	0.873364	0.995072	1.10379	0.933224	0.951015	0.778402	0.745272	0.719946	0.864646	0.941103	0.864913	0.831883	0.789062	0.930893	1.07403	0.783104	0.839255	1.02255	0.732824	1.00229	0.912459	0.971707	0.915918	0.798682	0.803515	0.859905	1.00887	0.77006	0.81828	0.801126	0.789277	0.921371	0.920319	0.814697	0.941961	0.708503	0.79848	0.85043	0.796988	0.987691	0.944895	1.00733	0.62394	0.780432	0.726211	0.777039
	2.56297	1.0179	0.806141	0.903753	1.06127	1.06539	0.944972	0.968377	0.772202	0.749161	0.721384	0.885136	0.944753	0.892664	0.844138	0.772963	0.926946	1.05726	0.805558	0.835386	1.05227	0.742094	1.05938	0.952585	0.955429	0.941925	0.84836	0.816457	0.855263	1.02581	0.773885	0.814135	0.820449	0.795483	0.906831	0.902143	0.809763	0.96167	0.725146	0.823246	0.85415	0.811502	1.00009	0.958423	1.05771	0.610318	0.812748	0.742566	0.790529
	2.5964	0.991284	0.799068	0.941474	1.03882	1.06374	0.962881	0.913151	0.774889	0.739617	0.725874	0.915669	0.919578	0.879831	0.82476	0.784523	0.95639	1.034	0.815465	0.852021	1.00892	0.749748	0.990564	0.949203	0.980808	0.974818	0.826537	0.839434	0.861388	1.04873	0.762551	0.799637	0.793919	0.788826	0.908604	0.89401	0.836722	0.940597	0.717415	0.810128	0.834028	0.833665	0.988003	0.927922	1.02741	0.636908	0.79861	0.753692	0.825697
	2.62965	0.979796	0.785729	0.928594	1.05147	1.05645	0.96987	0.940154	0.770527	0.735175	0.732922	0.911991	0.913568	0.893541	0.808637	0.791794	0.97384	1.08713	0.828605	0.857628	0.974521	0.743676	0.984443	0.952549	0.961032	0.94937	0.840172	0.856126	0.827366	1.03747	0.729379	0.80795	0.781781	0.791534	0.904763	0.888083	0.841789	0.952717	0.721405	0.837124	0.826573	0.848417	1.01118	0.965619	1.03648	0.636995	0.803943	0.75482	0.819632
	2.663	0.971162	0.7923	0.925464	1.06358	1.0041	0.964078	0.919339	0.769173	0.736829	0.769142	0.94397	0.951615	0.900336	0.811168	0.822126	0.974396	1.0984	0.837854	0.85542	0.94886	0.779354	0.958512	0.94025	0.964201	0.974913	0.82918	0.863103	0.852039	1.08261	0.732836	0.794699	0.757604	0.782742	0.904173	0.893824	0.855663	0.951105	0.688331	0.842483	0.814986	0.870027	1.01069	0.965958	1.06585	0.664074	0.819457	0.759232	0.784816
	2.69632	0.953793	0.804319	0.89006	1.08331	0.995401	0.969427	0.880994	0.775064	0.728992	0.76809	0.923822	0.937713	0.919278	0.798697	0.778551	0.966459	1.09258	0.849569	0.856031	0.943195	0.772649	0.939046	0.932595	0.970205	0.989564	0.857506	0.871931	0.827018	1.06274	0.727045	0.805888	0.762669	0.765145	0.925845	0.875937	0.833964	0.922574	0.698588	0.822247	0.82274	0.873693	1.00142	0.947697	1.02479	0.667678	0.841583	0.772229	0.806356
	2.72963	0.904285	0.810519	0.926844	1.08183	1.01758	0.972085	0.886537	0.787152	0.73505	0.741788	0.938842	0.934116	0.905354	0.813365	0.800632	0.963937	1.11404	0.829186	0.873063	0.947088	0.770321	0.940468	0.953505	0.952732	1.00865	0.845866	0.865285	0.815242	1.07511	0.717319	0.821818	0.756004	0.789563	0.908487	0.893357	0.852406	0.953886	0.706226	0.834364	0.768572	0.892887	0.996994	0.962789	1.09378	0.663584	0.830901	0.779306	0.841091
	2.76298	0.886111	0.818579	0.907856	1.06074	1.00826	0.956722	0.873605	0.77762	0.738411	0.772586	0.956315	0.928827	0.915927	0.785844	0.784978	0.988131	1.11197	0.861835	0.872789	0.923043	0.76861	0.929132	0.931078	0.935611	0.978482	0.848233	0.865954	0.79692	1.09512	0.698779	0.839709	0.747879	0.786637	0.917726	0.891069	0.861757	0.915414	0.673134	0.828393	0.768876	0.874691	1.02016	0.931352	0.995682	0.679139	0.798068	0.81122	0.765231
	2.79632	0.845369	0.817689	0.916227	1.08175	0.92584	0.967856	0.857958	0.74493	0.741305	0.751479	0.970931	0.929496	0.913004	0.766174	0.766596	1.00074	1.11231	0.850639	0.842837	0.928881	0.755139	0.910061	0.946542	0.956077	1.02661	0.851491	0.873187	0.796403	1.07334	0.674204	0.817502	0.745106	0.790393	0.917245	0.876258	0.856054	0.932697	0.682769	0.855826	0.739493	0.887558	0.979991	0.927197	1.0676	0.662961	0.827401	0.807267	0.828742
	2.82968	0.845033	0.803411	0.906415	1.06487	0.938384	0.979339	0.842431	0.749214	0.721471	0.750487	0.986459	0.935617	0.951225	0.770682	0.766211	0.996518	1.12881	0.857153	0.840966	0.921451	0.764605	0.899339	0.918178	0.944469	1.01759	0.846937	0.866481	0.780723	1.0822	0.689815	0.836587	0.736727	0.780514	0.909239	0.87994	0.864853	0.914053	0.664163	0.843129	0.748411	0.893724	0.995667	0.954981	1.05315	0.690433	0.828267	0.807074	0.764438
	2.86298	0.83159	0.793883	0.925287	1.06426	0.934009	0.957968	0.813142	0.740197	0.713476	0.730189	0.993624	0.902112	0.919027	0.744835	0.738645	1.00944	1.10134	0.842982	0.858172	0.892073	0.784557	0.896029	0.929452	0.920411	1.01038	0.842744	0.871974	0.763022	1.08683	0.665795	0.816812	0.737498	0.775688	0.894496	0.875818	0.854776	0.888301	0.664571	0.838215	0.729477	0.870651	1.01015	0.931311	1.03471	0.685739	0.810822	0.810319	0.780172
	2.89637	0.801965	0.79888	0.911664	1.05689	0.904429	0.933011	0.797471	0.745328	0.724552	0.756381	0.973708	0.913862	0.941751	0.734535	0.742469	1.00094	1.11308	0.866823	0.852873	0.908878	0.763382	0.890396	0.91712	0.900515	1.01322	0.836828	0.865089	0.770145	1.09679	0.654887	0.824043	0.736993	0.769488	0.90679	0.864978	0.857918	0.882444	0.667472	0.839695	0.712896	0.904748	1.01513	0.924512	1.01432	0.670745	0.796226	0.81882	0.753901
	2.92972	0.795095	0.78358	0.944654	1.07594	0.882915	0.958648	0.814918	0.731972	0.718319	0.753765	0.993643	0.93259	0.934096	0.728323	0.754476	1.01399	1.18744	0.880743	0.853356	0.86456	0.788052	0.901996	0.913873	0.910667	1.02388	0.85998	0.865418	0.775067	1.07691	0.663587	0.829663	0.722841	0.771079	0.894546	0.883587	0.87913	0.893011	0.652388	0.873379	0.696221	0.925483	0.998964	0.921557	1.00204	0.683815	0.80007	0.788671	0.814141
	2.96302	0.76975	0.790172	0.932271	1.07423	0.882586	0.950455	0.840777	0.734396	0.712225	0.736928	1.00538	0.913438	0.953821	0.705919	0.739315	0.995683	1.13931	0.867676	0.826962	0.889765	0.767465	0.886084	0.907161	0.911782	1.03557	0.820212	0.840531	0.766951	1.08655	0.64502	0.840155	0.732496	0.771213	0.894473	0.877275	0.863277	0.898747	0.63434	0.84233	0.701088	0.923239	1.02284	0.927141	1.00924	0.683418	0.812704	0.807384	0.80298
	2.99633	0.772764	0.764734	0.898748	1.07673	0.856374	0.934723	0.815739	0.732229	0.702909	0.750581	1.02122	0.92035	0.974973	0.695488	0.719512	1.00924	1.16463	0.871684	0.842276	0.876081	0.756627	0.867324	0.893472	0.903914	1.02844	0.838087	0.851956	0.760666	1.07609	0.631731	0.834699	0.690976	0.766627	0.892135	0.877567	0.850625	0.864575	0.635708	0.837445	0.685896	0.93727	0.999763	0.938985	0.930337	0.70986	0.812271	0.809104	0.771608
	3.0297	0.768019	0.778723	0.909151	1.08028	0.87819	0.940241	0.832455	0.715878	0.717215	0.756295	1.02193	0.903256	0.986573	0.684506	0.740284	1.0233	1.14145	0.877176	0.837426	0.884262	0.759063	0.889166	0.899466	0.898449	1.03809	0.825346	0.856457	0.747151	1.1046	0.64323	0.833795	0.740809	0.772232	0.899008	0.889194	0.865063	0.886267	0.638289	0.871558	0.695409	0.95479	0.993049	0.94232	1.00519	0.666453	0.790366	0.815779	0.775044
	3.06305	0.745806	0.766165	0.901259	1.05608	0.843069	0.943854	0.792669	0.709833	0.731617	0.779831	1.01615	0.901754	0.976607	0.678801	0.716096	0.972461	1.11132	0.855492	0.835177	0.88253	0.759187	0.870535	0.891662	0.895046	1.01565	0.837265	0.850826	0.744303	1.10956	0.615429	0.846446	0.72114	0.754327	0.856077	0.880055	0.865771	0.86064	0.617851	0.826952	0.664454	0.93493	0.996092	0.943503	0.991223	0.685401	0.810329	0.832628	0.806959
	3.09635	0.728642	0.775937	0.921107	1.05736	0.853682	0.95284	0.805781	0.705862	0.704233	0.757235	1.02896	0.898147	0.99224	0.656103	0.705643	0.970514	1.13904	0.864257	0.816672	0.869118	0.76282	0.847546	0.902171	0.899111	1.02418	0.828471	0.827233	0.725395	1.08159	0.61457	0.807368	0.717514	0.753184	0.853701	0.881403	0.870516	0.876948	0.627738	0.841618	0.656298	0.963449	0.969084	0.906493	1.01656	0.691882	0.803428	0.809239	0.75591
	3.12965	0.723519	0.776706	0.900104	1.04963	0.846495	0.955895	0.79318	0.69847	0.699435	0.738996	1.00839	0.878018	0.990394	0.655965	0.702508	0.997845	1.08291	0.864733	0.825199	0.84692	0.81229	0.84333	0.905789	0.921224	1.01992	0.793403	0.824516	0.732155	1.10213	0.611087	0.807453	0.723492	0.766139	0.892742	0.856817	0.889358	0.845388	0.600554	0.874988	0.651201	0.970757	0.96341	0.893148	0.953225	0.68355	0.817632	0.78921	0.762083
	3.16302	0.725979	0.771012	0.89852	1.04739	0.836735	0.938093	0.749813	0.710291	0.707932	0.757275	1.03121	0.884021	1.00207	0.638145	0.689927	0.953073	1.11941	0.857822	0.82703	0.85442	0.761167	0.839462	0.873728	0.877788	1.01401	0.808428	0.836884	0.719226	1.10712	0.593224	0.816258	0.706417	0.757321	0.863904	0.877478	0.857549	0.867342	0.608549	0.842221	0.63885	0.953645	0.992278	0.942708	0.960274	0.663096	0.803563	0.830359	0.737439
	3.19635	0.709909	0.758854	0.896668	1.02919	0.818869	0.929376	0.746297	0.696441	0.705658	0.741777	1.03198	0.878419	0.996976	0.633393	0.679308	0.983708	1.10982	0.844447	0.807098	0.81732	0.757735	0.839608	0.867092	0.880318	1.03847	0.777726	0.837233	0.725063	1.11321	0.589183	0.815989	0.711642	0.756569	0.848778	0.838142	0.8782	0.84428	0.60217	0.840739	0.629029	0.938322	0.975094	0.897101	0.902	0.678277	0.825366	0.808995	0.739853
	3.22967	0.684529	0.754241	0.910346	1.02695	0.810418	0.927573	0.764854	0.6849	0.698099	0.755915	1.06851	0.889842	1.0111	0.613178	0.662804	0.953971	1.1118	0.856122	0.803338	0.842987	0.717324	0.829658	0.901753	0.901407	1.04725	0.786588	0.844538	0.724449	1.10309	0.579983	0.796933	0.706754	0.763755	0.809905	0.84116	0.88909	0.875243	0.612216	0.847987	0.636349	0.993306	0.974011	0.916751	0.952537	0.690376	0.817688	0.802875	0.74803
	3.263	0.691157	0.759858	0.901532	1.04755	0.790401	0.93915	0.746035	0.675073	0.688318	0.741886	1.03683	0.882695	1.0201	0.61434	0.673899	0.971237	1.1346	0.844218	0.808644	0.809774	0.770148	0.810892	0.872194	0.86553	1.04425	0.775299	0.844248	0.726213	1.13672	0.573207	0.80832	0.720773	0.760717	0.8433	0.827366	0.852429	0.822256	0.590723	0.829558	0.619212	1.00968	0.991474	0.877523	0.946305	0.668846	0.798282	0.806891	0.752941
	3.2963	0.660139	0.747322	0.865506	1.00769	0.778282	0.921962	0.73334	0.669865	0.674104	0.727998	1.04863	0.858276	0.997513	0.598396	0.665425	0.922996	1.11246	0.83163	0.802568	0.810718	0.724666	0.813226	0.857537	0.864244	1.00791	0.77542	0.837538	0.691051	1.12155	0.556085	0.779251	0.71211	0.747277	0.830626	0.842878	0.849128	0.842322	0.593286	0.843731	0.600235	0.979669	0.960507	0.889665	0.970182	0.654798	0.793211	0.810986	0.708666
	3.32967	0.667118	0.753242	0.881752	1.01566	0.772116	0.912823	0.711369	0.663393	0.665983	0.739051	1.01824	0.864732	0.999225	0.588334	0.653631	0.922727	1.11287	0.843737	0.790877	0.816174	0.742106	0.795921	0.845722	0.85405	1.05627	0.767564	0.80612	0.708654	1.13491	0.555504	0.778818	0.699157	0.759911	0.787788	0.821543	0.846326	0.837603	0.578277	0.836018	0.590576	1.00665	0.961747	0.874474	0.926496	0.64612	0.77214	0.795368	0.707795
	3.36302	0.646091	0.740664	0.877513	0.998241	0.733761	0.872153	0.693467	0.663188	0.65499	0.725923	1.04119	0.849297	0.973055	0.575105	0.652945	0.946996	1.10754	0.845389	0.792535	0.793689	0.734888	0.79785	0.830432	0.866702	1.02934	0.760803	0.824055	0.698141	1.09674	0.553819	0.772948	0.664936	0.738575	0.80424	0.821551	0.850927	0.822282	0.579114	0.816891	0.603273	0.984354	0.963504	0.873024	0.895397	0.638309	0.791489	0.80257	0.709857
	3.39633	0.630944	0.746697	0.88285	0.979999	0.745642	0.885356	0.692602	0.650191	0.669727	0.72804	1.03622	0.858574	0.96708	0.582025	0.652351	0.963695	1.11704	0.84031	0.78744	0.779911	0.733749	0.794494	0.848026	0.874395	1.02934	0.768745	0.818709	0.680141	1.08735	0.562389	0.779237	0.686326	0.770907	0.811069	0.810285	0.850109	0.825512	0.577272	0.843952	0.591101	0.970754	0.956746	0.845712	0.963613	0.659067	0.786142	0.814149	0.700253
	3.42965	0.636697	0.729787	0.865754	1.0113	0.758832	0.877488	0.696001	0.653154	0.674972	0.719839	1.05419	0.842833	0.97424	0.5811	0.639006	0.92007	1.10281	0.835421	0.786253	0.775418	0.723289	0.788227	0.825522	0.84844	0.993131	0.741299	0.796185	0.679244	1.08664	0.546657	0.756523	0.687213	0.749625	0.802393	0.809826	0.842346	0.809356	0.570205	0.810548	0.589843	1.00373	0.941587	0.876405	0.898029	0.635407	0.791395	0.809622	0.728727
	3.46298	0.627291	0.726126	0.856836	0.98501	0.733299	0.886978	0.68882	0.648659	0.664523	0.727751	1.04188	0.833889	0.942476	0.572181	0.645071	0.907291	1.14835	0.843367	0.754823	0.746676	0.69653	0.774384	0.816952	0.848939	1.00249	0.746403	0.82936	0.669444	1.10375	0.535044	0.75255	0.678879	0.744683	0.789719	0.800396	0.844931	0.813812	0.559112	0.820519	0.594666	0.980696	0.938255	0.90769	0.873125	0.651322	0.784549	0.802747	0.69339
	3.49633	0.614531	0.727597	0.885205	0.992673	0.765275	0.892691	0.673032	0.655218	0.663679	0.746025	1.0309	0.851512	0.955524	0.579036	0.644571	0.945215	1.11061	0.854616	0.769314	0.7692	0.749964	0.760941	0.820349	0.838923	1.02574	0.750336	0.802119	0.677048	1.09769	0.53315	0.745772	0.696618	0.745514	0.800132	0.80386	0.830557	0.798615	0.556057	0.814919	0.569527	0.978711	0.931848	0.90257	0.941135	0.631854	0.806971	0.806945	0.693744
	3.52972	0.60577	0.746473	0.869894	0.934276	0.749521	0.871272	0.671466	0.643523	0.637844	0.718253	1.03245	0.846363	0.927401	0.563597	0.623137	0.922634	1.07209	0.831439	0.763047	0.755156	0.755793	0.765973	0.813461	0.830903	1.01496	0.730688	0.794869	0.67283	1.0964	0.523524	0.748985	0.649673	0.752254	0.798355	0.819846	0.820164	0.799466	0.568213	0.803365	0.55966	0.977648	0.924882	0.912461	0.904849	0.624427	0.751165	0.787918	0.709925
	3.563	0.604822	0.707651	0.850794	0.961967	0.743655	0.868604	0.675242	0.645528	0.649975	0.700975	1.04091	0.832593	0.917732	0.564408	0.65254	0.919744	1.09176	0.819	0.758075	0.748056	0.69814	0.734564	0.812682	0.844356	1.00741	0.719058	0.804462	0.671736	1.08372	0.514062	0.7619	0.688146	0.747313	0.796074	0.802999	0.844163	0.79367	0.57368	0.803502	0.575198	1.01106	0.934911	0.90116	0.897664	0.600062	0.76179	0.796159	0.711791
	3.59635	0.593264	0.724875	0.849863	0.975601	0.74339	0.865718	0.661907	0.636381	0.649592	0.722877	1.03083	0.840666	0.923304	0.553614	0.624749	0.950879	1.08876	0.814798	0.747457	0.727044	0.682838	0.746446	0.82091	0.840643	1.03321	0.716409	0.794501	0.648934	1.10468	0.511873	0.748634	0.675548	0.726799	0.801284	0.776403	0.838781	0.794993	0.565716	0.799147	0.542089	0.964496	0.942185	0.868174	0.886449	0.615666	0.771136	0.800891	0.707753
	3.6297	0.579924	0.715968	0.851249	0.95613	0.705835	0.858168	0.65743	0.630524	0.633512	0.702369	1.05475	0.856478	0.909655	0.552883	0.615454	0.936325	1.0835	0.806404	0.749601	0.744954	0.692035	0.763806	0.804737	0.842797	1.01116	0.748134	0.784765	0.654129	1.09401	0.507304	0.726295	0.655435	0.750494	0.772384	0.795919	0.869116	0.778334	0.561371	0.823642	0.54804	0.991723	0.929769	0.869632	0.89812	0.604502	0.753821	0.811882	0.691498
	3.66302	0.572049	0.7222	0.860409	0.949415	0.706598	0.851654	0.637721	0.635955	0.639979	0.718994	1.01406	0.828841	0.920789	0.545777	0.609049	0.91541	1.07968	0.811356	0.734688	0.717952	0.685757	0.739679	0.811674	0.84098	1.0113	0.717022	0.77777	0.657812	1.09077	0.505688	0.715319	0.641711	0.72886	0.786774	0.774964	0.839833	0.776709	0.546037	0.796329	0.53233	0.991759	0.909537	0.876236	0.945617	0.623912	0.779609	0.811279	0.709785
	3.69637	0.570286	0.709399	0.829923	0.940033	0.688706	0.867701	0.637977	0.63326	0.622254	0.687239	1.02141	0.836234	0.89739	0.539408	0.607382	0.919073	1.08419	0.817781	0.742912	0.700522	0.699961	0.728262	0.783075	0.824288	1.01709	0.71855	0.801395	0.637597	1.02794	0.490552	0.705112	0.630838	0.710281	0.800072	0.774879	0.84137	0.772976	0.552007	0.804328	0.535025	0.987621	0.897645	0.844617	0.887383	0.58318	0.750634	0.78442	0.671242
	3.7297	0.581965	0.727157	0.841644	0.939816	0.705693	0.855757	0.643965	0.628922	0.635477	0.709288	1.06449	0.823316	0.897692	0.536345	0.583124	0.916409	1.08359	0.825393	0.742692	0.725853	0.682367	0.733149	0.757423	0.810365	0.988081	0.701854	0.772344	0.643111	1.06384	0.50132	0.724702	0.650776	0.734587	0.781005	0.764614	0.831138	0.76289	0.540915	0.804056	0.543416	0.991557	0.928648	0.888711	0.892031	0.633546	0.785812	0.796659	0.656883
	3.76303	0.561344	0.714324	0.828994	0.957676	0.680812	0.848211	0.639027	0.624284	0.618598	0.703333	1.03704	0.823028	0.919187	0.536223	0.609793	0.912087	1.09984	0.780853	0.753723	0.719614	0.677302	0.699643	0.790988	0.821024	1.02677	0.703681	0.7886	0.646881	1.07196	0.483094	0.708689	0.6657	0.722392	0.754667	0.787699	0.834364	0.756616	0.545319	0.820023	0.543838	0.973647	0.922624	0.860931	0.828596	0.59733	0.781466	0.826233	0.641547
	3.79635	0.549976	0.709713	0.808375	0.93789	0.676234	0.847003	0.636758	0.621941	0.604719	0.704169	1.04131	0.810251	0.88848	0.533069	0.607402	0.925072	1.08472	0.818328	0.74746	0.715699	0.704683	0.706722	0.772779	0.819182	1.00752	0.7025	0.789118	0.631924	1.07984	0.475262	0.701787	0.626785	0.698671	0.76033	0.792562	0.819366	0.771636	0.529073	0.808946	0.526864	0.959739	0.913071	0.841814	0.903677	0.602353	0.749998	0.788305	0.665278
	3.8297	0.544005	0.693626	0.808409	0.93233	0.65965	0.808932	0.624937	0.608683	0.597254	0.692356	1.01693	0.794182	0.879752	0.511532	0.595283	0.910685	1.07996	0.786882	0.734773	0.682737	0.687445	0.706141	0.759012	0.811482	1.00187	0.695529	0.777317	0.613298	1.02089	0.473908	0.681696	0.657726	0.725607	0.749782	0.752605	0.815135	0.753815	0.525871	0.792707	0.514572	0.946442	0.863503	0.838669	0.838804	0.579289	0.722948	0.79257	0.664161
	3.86303	0.54584	0.705355	0.845744	0.923302	0.66977	0.826692	0.631804	0.61072	0.599659	0.672237	1.00585	0.813344	0.902271	0.518306	0.606859	0.918594	1.07795	0.807142	0.737819	0.695814	0.703995	0.729848	0.78094	0.833472	1.03481	0.694863	0.801417	0.625779	1.04059	0.47515	0.704973	0.60112	0.726447	0.737297	0.785116	0.823852	0.78099	0.53633	0.808408	0.542782	0.981668	0.917969	0.859095	0.87218	0.585905	0.766105	0.786648	0.630214
	3.89638	0.544632	0.695092	0.799894	0.918642	0.665487	0.821355	0.598616	0.593788	0.601498	0.689325	1.02382	0.805435	0.879438	0.515716	0.57891	0.914848	1.11112	0.802662	0.734339	0.687276	0.672962	0.699686	0.779843	0.807102	1.02282	0.683074	0.79132	0.609661	1.03989	0.472496	0.690356	0.631877	0.712272	0.762926	0.77233	0.831243	0.770976	0.53853	0.80519	0.507871	0.97615	0.875855	0.812159	0.866873	0.590211	0.748572	0.782572	0.641245
	3.92968	0.532634	0.685528	0.794661	0.898082	0.656126	0.83138	0.619904	0.587964	0.589899	0.667736	1.00188	0.793292	0.880797	0.521212	0.610356	0.919033	1.06034	0.787419	0.705902	0.671097	0.697812	0.69453	0.751953	0.786704	0.99484	0.658556	0.774224	0.61279	1.03466	0.468725	0.687811	0.609009	0.706194	0.742899	0.77035	0.804528	0.76773	0.514762	0.812265	0.509203	0.933507	0.880022	0.841784	0.869492	0.594032	0.737183	0.777795	0.643716
	3.96302	0.529584	0.683491	0.788994	0.892957	0.65841	0.810772	0.588276	0.594819	0.582991	0.676436	0.993358	0.77826	0.902735	0.519694	0.591796	0.903902	1.08083	0.821098	0.713869	0.65955	0.678909	0.679959	0.762862	0.799045	0.990898	0.651193	0.7629	0.606346	1.06309	0.466931	0.686008	0.646973	0.705473	0.734052	0.753846	0.84302	0.752313	0.521718	0.798515	0.508588	0.966265	0.902273	0.831086	0.849911	0.594974	0.728974	0.79317	0.644398
	3.99637	0.523198	0.670493	0.798414	0.91054	0.650667	0.788742	0.601007	0.585603	0.576255	0.66302	1.02055	0.794599	0.89357	0.520727	0.573214	0.951077	1.06428	0.797504	0.717846	0.644912	0.66612	0.695896	0.764527	0.80548	1.00795	0.654376	0.770352	0.596616	1.01623	0.458567	0.676209	0.604407	0.696586	0.732936	0.76161	0.833724	0.749937	0.519251	0.792473	0.502394	0.946363	0.910236	0.809895	0.806772	0.574137	0.737405	0.804093	0.662004
	4.02968	0.52999	0.691244	0.807013	0.896171	0.629578	0.810854	0.59319	0.568226	0.581652	0.676885	1.01188	0.796537	0.883162	0.514918	0.589224	0.914543	1.06842	0.767999	0.712882	0.674236	0.672045	0.689464	0.771145	0.763868	0.974867	0.663988	0.773551	0.603212	1.01569	0.461418	0.683528	0.616924	0.680793	0.717364	0.742162	0.80392	0.733747	0.508604	0.798161	0.486925	0.936307	0.895687	0.826066	0.80775	0.578689	0.732695	0.771214	0.63413
	4.06302	0.532136	0.667964	0.796191	0.889939	0.639175	0.792706	0.582381	0.563548	0.577776	0.660099	1.00733	0.774487	0.879375	0.510178	0.580934	0.914991	1.0538	0.794882	0.692487	0.658812	0.698772	0.679767	0.753683	0.77035	0.98083	0.658944	0.756307	0.598847	1.0079	0.459881	0.675654	0.602642	0.688907	0.749192	0.74694	0.787255	0.738021	0.50325	0.761153	0.47728	0.941571	0.882258	0.812289	0.844105	0.577333	0.73616	0.785737	0.637499
	4.09635	0.518146	0.669401	0.799558	0.892929	0.645057	0.781306	0.587432	0.570034	0.555244	0.690052	1.00831	0.775345	0.874116	0.502505	0.584883	0.92105	1.02929	0.78684	0.701268	0.640853	0.680833	0.659453	0.754006	0.76886	0.981441	0.639129	0.748376	0.603804	1.00189	0.460851	0.668672	0.594862	0.677113	0.729529	0.740949	0.810946	0.734739	0.515297	0.79207	0.493842	0.940826	0.89836	0.789628	0.830077	0.558955	0.689877	0.7676	0.626326
	4.12967	0.520671	0.660977	0.787939	0.8887	0.626441	0.791772	0.58677	0.562071	0.552409	0.673039	1.03002	0.784169	0.865085	0.504543	0.595783	0.901449	1.03053	0.773333	0.698493	0.658346	0.660525	0.678562	0.760121	0.796721	0.999345	0.638987	0.779121	0.594099	1.03347	0.458084	0.663916	0.606416	0.68739	0.695278	0.728214	0.816001	0.718922	0.519609	0.810889	0.493077	0.90857	0.884037	0.797963	0.820587	0.561915	0.709228	0.77823	0.661892
	4.16302	0.5107	0.661854	0.787925	0.856386	0.63562	0.778203	0.567775	0.557258	0.550088	0.656002	0.964139	0.784482	0.850556	0.491322	0.582996	0.899667	1.02017	0.769067	0.701194	0.640068	0.627158	0.654281	0.72187	0.775456	0.957951	0.618728	0.75072	0.580321	0.968751	0.453838	0.66819	0.59729	0.659726	0.707507	0.727129	0.809683	0.71822	0.499728	0.776377	0.498725	0.916945	0.886626	0.790145	0.797453	0.546603	0.69759	0.76941	0.616317
	4.19635	0.505511	0.653095	0.80684	0.860307	0.618623	0.775955	0.577583	0.559936	0.556244	0.663467	0.988319	0.770399	0.850614	0.499514	0.568218	0.882573	1.0503	0.770351	0.689892	0.628037	0.670774	0.648615	0.734461	0.781695	0.98715	0.617881	0.758454	0.58199	1.0232	0.440868	0.66472	0.60546	0.671917	0.722413	0.729225	0.807469	0.72723	0.496385	0.779628	0.47819	0.915726	0.872173	0.788385	0.791163	0.563158	0.708283	0.755296	0.629416
	4.22972	0.499144	0.656409	0.792312	0.860424	0.634905	0.787894	0.562496	0.538627	0.54476	0.673652	0.986884	0.772775	0.836999	0.498341	0.559358	0.894194	1.02496	0.793908	0.678911	0.647401	0.647311	0.659331	0.729222	0.758542	0.993611	0.628881	0.742474	0.575462	1.01552	0.450051	0.661464	0.593445	0.676518	0.709171	0.725508	0.809325	0.721388	0.495511	0.778839	0.477321	0.923459	0.840131	0.791342	0.771846	0.564208	0.705814	0.752984	0.609284
	4.26303	0.487747	0.670274	0.785694	0.85519	0.614153	0.782801	0.54896	0.547891	0.541717	0.648344	0.985006	0.763035	0.844034	0.495421	0.565636	0.911028	1.05855	0.768529	0.681184	0.642333	0.645989	0.655138	0.722614	0.744423	0.997301	0.603397	0.722203	0.587537	0.992356	0.447323	0.662582	0.616693	0.667019	0.698964	0.706384	0.797147	0.716113	0.49738	0.770236	0.473913	0.932116	0.829958	0.769697	0.765458	0.560222	0.693032	0.755532	0.622729
	4.29637	0.501843	0.643825	0.784697	0.842265	0.598807	0.764212	0.549828	0.544586	0.52117	0.64837	0.989551	0.758643	0.836737	0.495561	0.582023	0.873043	0.993034	0.781563	0.670963	0.636023	0.661656	0.653776	0.7077	0.750336	1.00391	0.604582	0.731593	0.572526	1.00389	0.446286	0.667256	0.60804	0.646496	0.682708	0.708794	0.807555	0.700516	0.500155	0.766366	0.468171	0.907475	0.818005	0.772863	0.744684	0.57886	0.694801	0.754843	0.611094
	4.32968	0.491165	0.633934	0.777183	0.84949	0.618799	0.75636	0.550372	0.526644	0.539182	0.636944	0.968527	0.7556	0.826437	0.497205	0.566855	0.885797	1.02228	0.781416	0.677936	0.621411	0.652129	0.647229	0.713944	0.733384	0.992579	0.609779	0.733707	0.574074	1.01198	0.440597	0.656639	0.603495	0.65457	0.713567	0.719417	0.807506	0.709571	0.485165	0.791561	0.462883	0.89352	0.847143	0.752604	0.72552	0.583164	0.671292	0.759433	0.61585
	4.36303	0.487195	0.634023	0.767898	0.824288	0.595447	0.754274	0.53806	0.529369	0.536394	0.648385	0.954261	0.750576	0.832268	0.482138	0.581689	0.868393	1.00074	0.76738	0.671132	0.619539	0.659416	0.642199	0.700962	0.743939	0.974048	0.606211	0.71719	0.559672	0.992586	0.440141	0.66376	0.58912	0.651391	0.684213	0.720053	0.778909	0.693912	0.476281	0.753814	0.463585	0.913778	0.833808	0.740454	0.788492	0.588186	0.672269	0.761108	0.592845
	4.39635	0.481234	0.634029	0.780584	0.826123	0.578804	0.7397	0.528776	0.524628	0.524342	0.649821	0.966006	0.742341	0.818645	0.48388	0.566582	0.877514	0.99461	0.764862	0.651524	0.614504	0.607418	0.638246	0.692948	0.753075	1.00414	0.592982	0.713111	0.571416	0.98821	0.438279	0.651857	0.581026	0.629561	0.689376	0.689094	0.79759	0.697961	0.481623	0.767021	0.459768	0.876372	0.820754	0.729688	0.73024	0.564807	0.670684	0.76197	0.597782
	4.42968	0.477111	0.631274	0.759208	0.805886	0.601291	0.747565	0.540749	0.514136	0.53286	0.647726	0.95692	0.733624	0.813834	0.477753	0.55968	0.890933	1.02341	0.765243	0.669193	0.611668	0.665792	0.639895	0.727661	0.751004	0.980816	0.599603	0.715955	0.563897	0.981037	0.435712	0.647312	0.574668	0.637252	0.647658	0.701114	0.761209	0.682267	0.485898	0.768524	0.466524	0.904325	0.810511	0.741785	0.737687	0.553147	0.672498	0.753509	0.61906
	4.46303	0.490212	0.615671	0.752616	0.82175	0.586254	0.748809	0.535639	0.522032	0.511049	0.638916	0.94819	0.740123	0.801071	0.47799	0.564349	0.89301	0.987967	0.776556	0.656007	0.606913	0.638096	0.629731	0.676709	0.724021	0.962145	0.581212	0.7079	0.551009	0.960854	0.438257	0.637982	0.564956	0.642804	0.672013	0.699203	0.767926	0.652603	0.486731	0.74204	0.453474	0.889663	0.820398	0.735561	0.718353	0.544914	0.657911	0.76681	0.593044
	4.49638	0.470348	0.617713	0.756116	0.808625	0.590669	0.744439	0.54293	0.5231	0.523187	0.630489	0.926483	0.724845	0.796126	0.477844	0.555367	0.877657	1.00429	0.757646	0.663745	0.624285	0.634619	0.631678	0.696444	0.72575	0.96226	0.570929	0.693234	0.562121	0.973375	0.443293	0.633599	0.580644	0.633427	0.688784	0.703538	0.76921	0.6839	0.48724	0.756584	0.462556	0.89032	0.81654	0.739303	0.723907	0.573642	0.676	0.76706	0.587636
	4.52968	0.479719	0.636884	0.767406	0.822611	0.597283	0.736011	0.548093	0.523257	0.520573	0.65278	0.963978	0.743855	0.789608	0.489102	0.563688	0.896188	1.01689	0.785363	0.655907	0.62356	0.635942	0.658998	0.684196	0.751761	0.979929	0.577727	0.70554	0.57062	0.996325	0.43918	0.628332	0.581787	0.639095	0.660445	0.709246	0.770439	0.695136	0.485365	0.767082	0.458269	0.902872	0.815995	0.734383	0.732043	0.554371	0.678593	0.756119	0.591784
	4.563	0.468878	0.616731	0.75077	0.791011	0.57794	0.726228	0.524142	0.505923	0.514251	0.612295	0.96462	0.709713	0.807584	0.469276	0.551094	0.838178	0.970499	0.779994	0.650879	0.603877	0.612161	0.622167	0.676972	0.711706	0.941295	0.55126	0.680914	0.554842	0.952077	0.429931	0.624773	0.55853	0.637828	0.65287	0.679662	0.78292	0.668059	0.494082	0.761387	0.464504	0.884595	0.806131	0.757271	0.701042	0.55911	0.63812	0.713345	0.609149
	4.59635	0.473562	0.617615	0.737987	0.796022	0.582337	0.734137	0.534918	0.512854	0.49993	0.610683	0.962889	0.728055	0.793072	0.472206	0.554513	0.872478	1.00382	0.776761	0.642538	0.595209	0.632831	0.623318	0.688461	0.704557	0.974303	0.569161	0.69383	0.545607	0.964633	0.427452	0.599733	0.587357	0.63176	0.632945	0.695713	0.761683	0.668669	0.479024	0.742523	0.454952	0.906575	0.790605	0.729188	0.709961	0.541714	0.645574	0.741126	0.61364
	4.6297	0.468157	0.616706	0.758438	0.785807	0.584555	0.729849	0.526262	0.50706	0.508825	0.616778	0.944707	0.718128	0.777197	0.477903	0.544607	0.84862	1.00055	0.76189	0.644802	0.584459	0.60821	0.637661	0.676948	0.723602	0.948771	0.567955	0.687689	0.55353	0.98037	0.442454	0.634854	0.575309	0.610419	0.655166	0.688445	0.755067	0.660521	0.466565	0.750675	0.447098	0.881081	0.769639	0.699035	0.69519	0.557589	0.640647	0.738156	0.572989
	4.66303	0.46655	0.611549	0.740116	0.764976	0.57291	0.715282	0.508419	0.500302	0.502666	0.628677	0.92269	0.708704	0.774086	0.476931	0.531746	0.882529	0.997287	0.73637	0.628791	0.588612	0.606228	0.603577	0.651591	0.700176	0.930199	0.548736	0.682465	0.551429	0.965711	0.432284	0.622494	0.562666	0.611667	0.638124	0.677789	0.766665	0.649842	0.466923	0.732116	0.447037	0.885977	0.805839	0.705061	0.699167	0.534439	0.623218	0.740572	0.575391
	4.69632	0.475129	0.609915	0.748457	0.781586	0.57897	0.720426	0.517882	0.498519	0.49985	0.611384	0.936455	0.707439	0.779362	0.473115	0.551836	0.891067	0.97693	0.772661	0.633537	0.59879	0.633246	0.629068	0.645684	0.693119	0.94527	0.55029	0.691423	0.53695	0.958251	0.436224	0.613651	0.572909	0.61856	0.651978	0.680799	0.763881	0.642516	0.470484	0.747346	0.462305	0.876213	0.782134	0.706595	0.717715	0.553058	0.623565	0.740541	0.56607
	4.72968	0.455644	0.595685	0.728934	0.770606	0.567509	0.702395	0.518522	0.498255	0.500324	0.623548	0.922189	0.69213	0.781325	0.46804	0.557309	0.871024	0.980205	0.739957	0.620898	0.571888	0.604986	0.608661	0.663617	0.699757	0.905713	0.543894	0.675549	0.54091	0.964505	0.422599	0.614476	0.576106	0.622582	0.655637	0.687798	0.741163	0.632327	0.452319	0.746419	0.45732	0.888729	0.774983	0.681719	0.667944	0.526257	0.630275	0.749211	0.577483
	4.76302	0.464846	0.618274	0.72015	0.756972	0.567462	0.707395	0.518072	0.49288	0.481334	0.610413	0.932106	0.687362	0.774468	0.470604	0.540717	0.856732	0.991559	0.751135	0.624826	0.575998	0.623256	0.593591	0.632024	0.695246	0.937498	0.544237	0.682212	0.544176	0.956455	0.428192	0.616854	0.558199	0.592277	0.648501	0.684296	0.730129	0.648166	0.465908	0.741584	0.449042	0.859533	0.778032	0.711427	0.677449	0.509883	0.627757	0.699619	0.590037
	4.79635	0.45176	0.605121	0.717865	0.755042	0.569216	0.708104	0.50852	0.482909	0.481598	0.587594	0.930282	0.6912	0.76266	0.464071	0.53819	0.860658	0.952182	0.757364	0.614114	0.573132	0.610381	0.615401	0.648155	0.70055	0.95716	0.536938	0.674674	0.550187	0.933998	0.416294	0.606156	0.549803	0.613008	0.615382	0.677628	0.754333	0.62801	0.45952	0.732208	0.462628	0.865033	0.749812	0.701359	0.687697	0.525871	0.631746	0.722948	0.591109
	4.82968	0.451611	0.60299	0.716165	0.789191	0.564124	0.69747	0.496502	0.486048	0.489684	0.613501	0.914854	0.675032	0.764276	0.466425	0.515788	0.836	0.965109	0.736344	0.621346	0.564719	0.633336	0.589102	0.651965	0.678603	0.921407	0.544413	0.674367	0.536856	0.96659	0.417648	0.602235	0.564504	0.596179	0.616299	0.673447	0.733386	0.620058	0.450555	0.730705	0.452353	0.894788	0.774222	0.674837	0.664438	0.533636	0.621252	0.721897	0.55708
	4.86302	0.452235	0.610747	0.721658	0.759633	0.551629	0.703297	0.509556	0.476721	0.473752	0.588511	0.926484	0.679209	0.760769	0.464727	0.507825	0.836958	0.956789	0.747872	0.622586	0.572757	0.550487	0.602477	0.635528	0.697427	0.914419	0.538884	0.66938	0.523176	0.937985	0.41586	0.585712	0.548146	0.598829	0.61896	0.658674	0.721334	0.619896	0.459649	0.745142	0.444015	0.882978	0.744918	0.674029	0.633378	0.525985	0.609111	0.703917	0.566307
	4.89637	0.441332	0.602145	0.730045	0.751356	0.551332	0.700449	0.505567	0.477881	0.481054	0.585394	0.941371	0.68622	0.750081	0.467112	0.508352	0.857835	0.977483	0.738186	0.615369	0.545697	0.61517	0.598808	0.644267	0.663596	0.935737	0.540753	0.672837	0.519766	0.9346	0.417466	0.589709	0.546863	0.583004	0.631218	0.660601	0.738327	0.625995	0.45665	0.726465	0.455048	0.867562	0.747975	0.654236	0.678761	0.51439	0.608775	0.703263	0.551097
	4.9297	0.445192	0.594224	0.720007	0.742234	0.560552	0.686702	0.494746	0.472039	0.48433	0.595611	0.928409	0.677696	0.756509	0.45685	0.524291	0.839372	0.960316	0.741673	0.609198	0.5519	0.572025	0.581478	0.620218	0.663767	0.915378	0.526599	0.659084	0.517496	0.926139	0.418731	0.589193	0.569361	0.586134	0.620032	0.660686	0.731116	0.596273	0.442546	0.725866	0.453733	0.83241	0.757654	0.661141	0.638771	0.543897	0.622795	0.717687	0.557277
	4.96303	0.449706	0.589533	0.726038	0.748358	0.551295	0.690433	0.4986	0.479498	0.46405	0.600328	0.937538	0.675223	0.757984	0.461081	0.518524	0.842677	0.966696	0.732738	0.600494	0.565754	0.599409	0.581588	0.62768	0.677888	0.929463	0.545005	0.656514	0.520245	0.931772	0.418596	0.58018	0.544764	0.58047	0.623699	0.648593	0.735455	0.629689	0.465147	0.718816	0.44713	0.847284	0.743173	0.675966	0.66827	0.522766	0.612546	0.707078	0.569045
	4.99635	0.446838	0.593289	0.715287	0.73825	0.559386	0.679565	0.502557	0.471433	0.471635	0.585276	0.925296	0.669985	0.743078	0.466064	0.513796	0.807667	0.937271	0.727155	0.601838	0.555725	0.546929	0.602442	0.629272	0.666811	0.893338	0.527326	0.650711	0.511524	0.918082	0.422635	0.562506	0.550799	0.581537	0.623849	0.644554	0.748824	0.627073	0.446592	0.729842	0.437179	0.859854	0.747564	0.653375	0.656318	0.498346	0.602471	0.690395	0.568569
	5.02972	0.428694	0.586561	0.694646	0.713809	0.540785	0.650842	0.488149	0.460295	0.474196	0.554331	0.911707	0.66036	0.734263	0.455366	0.503451	0.776661	0.934444	0.723133	0.599592	0.548492	0.567879	0.575966	0.609359	0.660839	0.900612	0.513333	0.647094	0.513343	0.902128	0.417236	0.561024	0.558799	0.576135	0.618167	0.646889	0.738749	0.599524	0.454633	0.719033	0.453576	0.848815	0.737236	0.642869	0.615671	0.516753	0.59323	0.707843	0.538943
	5.06302	0.435537	0.586202	0.731869	0.732351	0.537174	0.679919	0.495232	0.466382	0.456427	0.578978	0.924789	0.65834	0.736694	0.457651	0.516943	0.826926	0.951064	0.726673	0.598384	0.558223	0.584245	0.584619	0.62878	0.663058	0.897325	0.52563	0.649685	0.502944	0.902171	0.411709	0.559614	0.550671	0.569901	0.618792	0.655648	0.745655	0.592236	0.445545	0.73362	0.445066	0.82858	0.73151	0.661356	0.653372	0.500587	0.60648	0.694584	0.54883
	5.09637	0.435561	0.570385	0.704955	0.701486	0.531769	0.67332	0.481663	0.46181	0.453118	0.565905	0.89827	0.656183	0.706432	0.455714	0.510814	0.802909	0.911932	0.706195	0.584181	0.537975	0.575065	0.566196	0.583761	0.659229	0.890149	0.516276	0.637444	0.510713	0.900459	0.41899	0.547213	0.559964	0.566369	0.605046	0.671483	0.701596	0.599541	0.45093	0.713976	0.43985	0.845572	0.734321	0.624603	0.659308	0.501988	0.595147	0.701921	0.542611
	5.12963	0.433513	0.569744	0.697008	0.711602	0.550183	0.647092	0.482349	0.454295	0.457846	0.549906	0.906322	0.652356	0.698983	0.452125	0.489829	0.813605	0.911119	0.691792	0.579654	0.5661	0.562214	0.561167	0.590143	0.65248	0.900568	0.513324	0.638381	0.497551	0.881267	0.412244	0.549308	0.547129	0.543635	0.613863	0.651782	0.703342	0.605511	0.443535	0.716901	0.432389	0.834011	0.712711	0.639778	0.654178	0.479696	0.595859	0.686414	0.511213
	5.16303	0.424586	0.569265	0.708754	0.70353	0.528352	0.654804	0.482329	0.443631	0.455327	0.570295	0.875726	0.653899	0.709248	0.44797	0.510453	0.790883	0.916365	0.701685	0.588118	0.551962	0.555484	0.580829	0.589585	0.664009	0.87206	0.502015	0.64954	0.506373	0.892302	0.411558	0.5374	0.550157	0.561017	0.583897	0.639657	0.722423	0.598926	0.451017	0.733553	0.44178	0.851328	0.727617	0.638358	0.614794	0.509154	0.596594	0.700135	0.520834
	5.19633	0.428237	0.553257	0.693795	0.701819	0.548508	0.660808	0.486984	0.45858	0.459379	0.569578	0.894237	0.635237	0.711529	0.45053	0.511925	0.784169	0.923122	0.691335	0.586792	0.541797	0.569062	0.57352	0.579892	0.644437	0.893919	0.512254	0.647093	0.504151	0.886513	0.415254	0.549761	0.54987	0.555024	0.605245	0.644367	0.709167	0.583738	0.447615	0.745296	0.44832	0.828658	0.704425	0.611468	0.625341	0.507613	0.567915	0.687489	0.544967
	5.2297	0.432792	0.568361	0.685559	0.701615	0.537739	0.652568	0.474616	0.467095	0.457287	0.561017	0.899979	0.642765	0.718295	0.452863	0.506182	0.773532	0.901174	0.708655	0.582759	0.545406	0.566242	0.568204	0.581809	0.651597	0.872013	0.497701	0.642794	0.488728	0.887995	0.414539	0.541883	0.556535	0.550951	0.595979	0.637616	0.70485	0.606494	0.440264	0.70682	0.434259	0.851843	0.736628	0.632883	0.618658	0.52472	0.575076	0.685116	0.517547
	5.26305	0.422391	0.554235	0.688606	0.695926	0.542007	0.646431	0.480301	0.444567	0.444226	0.562399	0.906204	0.635631	0.695264	0.441917	0.491655	0.805383	0.927358	0.698396	0.571371	0.549753	0.537662	0.575324	0.578496	0.661125	0.855906	0.491013	0.630592	0.486935	0.894348	0.408495	0.53803	0.516324	0.556501	0.597612	0.625624	0.707813	0.599683	0.436414	0.709792	0.427355	0.811679	0.73649	0.595348	0.590009	0.48722	0.567537	0.668702	0.533848
	5.29635	0.42226	0.550261	0.694156	0.693618	0.507262	0.646412	0.480174	0.452579	0.445888	0.552052	0.903053	0.628707	0.70993	0.447736	0.501124	0.79397	0.8872	0.686631	0.573381	0.534946	0.559723	0.566428	0.573599	0.623178	0.855223	0.484139	0.625649	0.502806	0.865847	0.415147	0.544862	0.546407	0.55198	0.602797	0.624631	0.699354	0.587315	0.43807	0.695588	0.432863	0.845937	0.711333	0.593939	0.61118	0.504194	0.579116	0.677557	0.552408
	5.3297	0.418217	0.538255	0.692754	0.689917	0.518306	0.647688	0.482613	0.433439	0.448342	0.557388	0.890028	0.638732	0.70241	0.440616	0.497504	0.799794	0.914782	0.680378	0.567678	0.542455	0.544336	0.567596	0.57262	0.646005	0.860268	0.49517	0.620665	0.492352	0.850144	0.406135	0.519655	0.554855	0.550144	0.604976	0.6332	0.698387	0.581151	0.433891	0.708534	0.417603	0.808381	0.704845	0.607428	0.618747	0.482367	0.571113	0.656687	0.534941
	5.36303	0.421333	0.539176	0.683426	0.683794	0.522169	0.648443	0.463345	0.442415	0.446165	0.548058	0.882017	0.625173	0.710876	0.443058	0.505461	0.779139	0.911572	0.686177	0.570282	0.543119	0.531689	0.57418	0.593861	0.636152	0.852997	0.498586	0.623187	0.483448	0.866142	0.408647	0.531374	0.522566	0.544701	0.590118	0.626727	0.697318	0.5857	0.428166	0.703154	0.438491	0.829874	0.702118	0.59976	0.608661	0.488447	0.579986	0.668738	0.547918
	5.39637	0.421065	0.542528	0.683578	0.67924	0.526896	0.630957	0.468427	0.45408	0.443057	0.547406	0.891339	0.625637	0.681152	0.449662	0.491853	0.747637	0.878377	0.665901	0.564086	0.532205	0.52279	0.564994	0.554851	0.625498	0.862414	0.490945	0.614633	0.490764	0.876605	0.405495	0.530707	0.537274	0.541345	0.595364	0.633869	0.691558	0.567478	0.429841	0.691288	0.42369	0.812394	0.697522	0.605077	0.607071	0.508181	0.559267	0.665874	0.525997
	5.42968	0.422127	0.540619	0.671389	0.682519	0.528607	0.640977	0.465628	0.437786	0.443186	0.540858	0.895433	0.630457	0.710558	0.462446	0.499152	0.793274	0.909197	0.689839	0.560226	0.525408	0.550497	0.558683	0.583668	0.637658	0.845815	0.501771	0.622967	0.487823	0.873027	0.405947	0.524164	0.528085	0.532783	0.573351	0.622243	0.705502	0.60466	0.426481	0.689138	0.437674	0.821586	0.681242	0.605808	0.593636	0.507324	0.570662	0.66455	0.524526
	5.46302	0.419625	0.549724	0.680541	0.67976	0.519457	0.626961	0.470325	0.431004	0.446156	0.556652	0.895198	0.614323	0.692187	0.44923	0.497491	0.768886	0.916526	0.681523	0.554139	0.519212	0.545823	0.579093	0.559152	0.617605	0.869262	0.481238	0.621477	0.485371	0.860782	0.403256	0.536884	0.54246	0.538134	0.610105	0.61681	0.701074	0.565112	0.434684	0.686393	0.438558	0.831493	0.697186	0.583463	0.589974	0.488176	0.570939	0.648335	0.516371
	5.49638	0.4189	0.54214	0.671969	0.664393	0.535251	0.605603	0.47254	0.435864	0.439457	0.525367	0.89225	0.611656	0.672334	0.454907	0.496026	0.77355	0.863013	0.658505	0.564696	0.520717	0.554801	0.55967	0.559292	0.645271	0.848594	0.4779	0.607254	0.475537	0.89447	0.407392	0.518047	0.530896	0.533131	0.589217	0.623767	0.699276	0.569921	0.424177	0.693315	0.427647	0.814943	0.687785	0.594331	0.593731	0.5088	0.567872	0.656286	0.498757
	5.52968	0.415804	0.536357	0.663067	0.658635	0.51733	0.61114	0.473188	0.428112	0.43088	0.531607	0.886776	0.605778	0.680612	0.444238	0.484218	0.757922	0.900775	0.661349	0.543145	0.506941	0.508809	0.549313	0.558664	0.608568	0.834278	0.480019	0.600899	0.476206	0.844011	0.407966	0.510802	0.521809	0.512211	0.594937	0.616449	0.68489	0.551503	0.435072	0.663148	0.424923	0.794611	0.694491	0.579718	0.622548	0.467725	0.557038	0.650846	0.520687
	5.56302	0.419572	0.541775	0.652314	0.65336	0.504822	0.624538	0.465854	0.438583	0.437206	0.526278	0.872015	0.611577	0.68863	0.445581	0.477067	0.772248	0.894157	0.650754	0.559204	0.545834	0.530916	0.548614	0.539236	0.618092	0.828107	0.488325	0.602793	0.490191	0.843144	0.399029	0.5208	0.523441	0.509469	0.589224	0.60557	0.691635	0.566658	0.427482	0.670698	0.426689	0.792574	0.688545	0.581772	0.577019	0.481493	0.560165	0.648287	0.521143
	5.59635	0.415812	0.519916	0.650416	0.632902	0.525365	0.609232	0.461276	0.421482	0.426785	0.521385	0.878116	0.612058	0.674549	0.440743	0.498135	0.752849	0.895411	0.665157	0.536911	0.514814	0.529505	0.551298	0.552977	0.60131	0.817825	0.475502	0.604155	0.475834	0.846883	0.398403	0.500431	0.501798	0.510532	0.564003	0.617182	0.682385	0.553517	0.415691	0.665918	0.426501	0.793158	0.682085	0.581717	0.57041	0.48743	0.547143	0.664604	0.520793
	5.62972	0.417403	0.527235	0.65571	0.659255	0.518261	0.622869	0.452202	0.427331	0.430509	0.514921	0.886601	0.597174	0.676464	0.449927	0.503028	0.744401	0.907233	0.660655	0.551578	0.516539	0.540728	0.552093	0.553949	0.592074	0.841911	0.481689	0.611677	0.472635	0.859322	0.406338	0.507136	0.517953	0.519778	0.568587	0.624205	0.685575	0.558932	0.436877	0.681984	0.424082	0.797357	0.677215	0.567217	0.571703	0.484641	0.557343	0.647716	0.523687
	5.663	0.414647	0.509943	0.649267	0.642437	0.512918	0.623336	0.450639	0.425425	0.430748	0.527785	0.848411	0.58972	0.674207	0.440648	0.498153	0.735557	0.880368	0.645499	0.53293	0.517554	0.520283	0.5481	0.526806	0.612366	0.825226	0.45771	0.605105	0.479695	0.835746	0.399522	0.510775	0.532149	0.527485	0.568117	0.629077	0.683006	0.541259	0.415081	0.677672	0.424586	0.799155	0.684525	0.569762	0.586164	0.485962	0.540137	0.644663	0.510021
	5.69628	0.416473	0.501627	0.63213	0.631187	0.496716	0.592999	0.449485	0.41617	0.432911	0.52588	0.857082	0.586245	0.664708	0.436254	0.503519	0.743716	0.863074	0.64343	0.545017	0.504832	0.491066	0.533922	0.532959	0.588623	0.814339	0.473916	0.589612	0.460746	0.840557	0.405032	0.499498	0.51344	0.513923	0.557296	0.608732	0.668813	0.546685	0.419638	0.652937	0.423413	0.806494	0.689942	0.576763	0.579	0.486165	0.555782	0.647746	0.534299
	5.7297	0.417889	0.519856	0.646266	0.643324	0.510426	0.606546	0.465332	0.422245	0.431551	0.513636	0.852278	0.592546	0.657386	0.435201	0.498388	0.740998	0.853174	0.655607	0.532093	0.516671	0.501579	0.539666	0.53676	0.593618	0.823594	0.464824	0.600422	0.469644	0.838517	0.38928	0.50909	0.521423	0.506381	0.566241	0.599513	0.680095	0.548672	0.428773	0.674422	0.417414	0.775977	0.69916	0.564271	0.588475	0.483507	0.538963	0.641459	0.50548
	5.76297	0.417102	0.523266	0.64254	0.62929	0.498738	0.593113	0.443622	0.417859	0.417124	0.52036	0.837537	0.59248	0.656244	0.435596	0.48222	0.740573	0.872159	0.628923	0.535509	0.512382	0.489667	0.541548	0.533542	0.58537	0.80496	0.466922	0.593334	0.458789	0.825842	0.391607	0.505408	0.515296	0.505802	0.584674	0.593355	0.675967	0.543572	0.423663	0.656708	0.417224	0.773949	0.687792	0.557693	0.556521	0.461021	0.534867	0.647799	0.508364
	5.79635	0.408661	0.522313	0.623421	0.641922	0.500642	0.604157	0.456534	0.42161	0.424433	0.531137	0.859529	0.582764	0.666621	0.439212	0.487897	0.744443	0.853434	0.640551	0.536867	0.516513	0.477874	0.557025	0.533919	0.591683	0.821168	0.449473	0.588899	0.471899	0.810287	0.394826	0.499805	0.514388	0.51191	0.567002	0.60058	0.684687	0.556662	0.418884	0.667525	0.410407	0.784508	0.677205	0.559411	0.578161	0.50042	0.530043	0.640517	0.507682
	5.8297	0.412618	0.501189	0.63844	0.65011	0.500111	0.590289	0.4451	0.412125	0.430628	0.510459	0.852437	0.576876	0.662383	0.433114	0.481145	0.726307	0.869088	0.631632	0.528319	0.511718	0.513221	0.519373	0.531458	0.587719	0.799392	0.454026	0.587576	0.460953	0.828761	0.390397	0.499919	0.505552	0.493402	0.554521	0.592933	0.669005	0.53485	0.417815	0.645092	0.413262	0.767957	0.68093	0.554669	0.569822	0.485302	0.516402	0.631607	0.513899
	5.86303	0.403699	0.512612	0.620441	0.628715	0.502372	0.60289	0.452322	0.418075	0.419511	0.506888	0.84066	0.573144	0.648944	0.43529	0.478973	0.736361	0.885343	0.639376	0.529343	0.512509	0.496786	0.532052	0.522539	0.590007	0.822581	0.455777	0.584059	0.465096	0.82036	0.394031	0.493983	0.527765	0.493451	0.572028	0.593367	0.659911	0.541546	0.4203	0.656063	0.406128	0.767368	0.6834	0.548944	0.57255	0.471642	0.524063	0.622615	0.499263
	5.89637	0.413789	0.507344	0.625205	0.628513	0.497589	0.58857	0.447415	0.41256	0.410533	0.510476	0.844518	0.569537	0.653772	0.435558	0.479998	0.732944	0.856582	0.616496	0.514194	0.51731	0.490951	0.530018	0.536571	0.575948	0.801479	0.444042	0.593247	0.467188	0.794559	0.394067	0.497598	0.51629	0.491499	0.57611	0.611035	0.656681	0.541184	0.420903	0.649323	0.408932	0.771594	0.664297	0.555227	0.565472	0.467322	0.520689	0.631207	0.494613
	5.92968	0.409012	0.498744	0.622003	0.63063	0.485704	0.586179	0.456809	0.408713	0.407688	0.509291	0.837201	0.560009	0.644025	0.428272	0.475171	0.739419	0.851684	0.621312	0.525146	0.495442	0.48684	0.528431	0.502007	0.581599	0.773524	0.441853	0.583186	0.45808	0.7982	0.39054	0.485001	0.496149	0.492751	0.576188	0.597322	0.666781	0.550031	0.410562	0.6475	0.399699	0.735173	0.665873	0.539596	0.551738	0.478259	0.540238	0.624484	0.478592
	5.96303	0.415908	0.513224	0.596303	0.621317	0.483439	0.600003	0.442611	0.410748	0.410219	0.504043	0.818933	0.579414	0.643107	0.431479	0.462534	0.723527	0.833918	0.619958	0.522829	0.494999	0.496706	0.518377	0.51626	0.578681	0.79832	0.447612	0.576687	0.450684	0.787367	0.399484	0.478395	0.498181	0.482705	0.558984	0.58547	0.658032	0.528908	0.418507	0.653723	0.402688	0.767461	0.655889	0.530993	0.540447	0.475534	0.521035	0.630529	0.511949
	5.99637	0.405121	0.501905	0.598088	0.620504	0.488898	0.573975	0.438596	0.413134	0.4102	0.519865	0.840436	0.564089	0.647331	0.43351	0.48494	0.70663	0.854132	0.602626	0.512585	0.506686	0.47465	0.502332	0.521466	0.573719	0.776283	0.43544	0.569614	0.462233	0.797236	0.389443	0.483931	0.504159	0.479236	0.559319	0.58338	0.651198	0.523938	0.40484	0.639029	0.402077	0.764778	0.658311	0.543402	0.587863	0.472906	0.522884	0.626432	0.466795
	6.02965	0.405249	0.488481	0.608967	0.611212	0.475674	0.569533	0.434266	0.403971	0.408411	0.493344	0.855154	0.562241	0.635528	0.426664	0.473888	0.732977	0.839832	0.632435	0.512994	0.499155	0.496186	0.521596	0.514343	0.585898	0.785714	0.456728	0.590019	0.455846	0.779379	0.385892	0.47749	0.504069	0.474913	0.544933	0.573841	0.65498	0.521149	0.408508	0.661847	0.40271	0.75465	0.656029	0.536226	0.538216	0.450622	0.503901	0.611633	0.507848
	6.06303	0.410836	0.502891	0.600809	0.632094	0.489824	0.571337	0.442941	0.411819	0.408745	0.508293	0.858327	0.567009	0.635859	0.4291	0.489517	0.71239	0.856277	0.615696	0.497458	0.503583	0.483763	0.515221	0.502445	0.566651	0.774696	0.446211	0.57616	0.453182	0.798461	0.380619	0.488076	0.500449	0.474671	0.535617	0.575959	0.642393	0.533093	0.419335	0.634131	0.407743	0.744517	0.631625	0.54806	0.566035	0.477337	0.52152	0.613814	0.502148
	6.09637	0.399194	0.487347	0.581781	0.593232	0.4996	0.559911	0.433961	0.407453	0.406458	0.485616	0.838495	0.554782	0.620763	0.425741	0.473404	0.728528	0.858219	0.60387	0.516011	0.498172	0.476899	0.510599	0.504197	0.568071	0.766574	0.451262	0.564255	0.454101	0.802399	0.391821	0.478287	0.514773	0.478416	0.552824	0.577138	0.645608	0.522765	0.407326	0.629526	0.405557	0.753876	0.655783	0.545647	0.579412	0.473018	0.509502	0.619174	0.493659
	6.1297	0.405375	0.499448	0.600024	0.588907	0.490232	0.57629	0.444544	0.407691	0.409835	0.514464	0.839539	0.55799	0.632898	0.421742	0.476892	0.719442	0.838448	0.606728	0.509825	0.500378	0.495946	0.512247	0.524662	0.576641	0.801868	0.430501	0.576095	0.455582	0.782678	0.389019	0.483963	0.503837	0.484377	0.539754	0.581428	0.652867	0.534925	0.423543	0.637301	0.410659	0.762027	0.654888	0.533303	0.537216	0.478873	0.519251	0.603349	0.455812
	6.16302	0.404205	0.503763	0.590212	0.605255	0.479531	0.5696	0.43713	0.408527	0.408212	0.506577	0.840025	0.550917	0.631291	0.43575	0.478495	0.722341	0.818046	0.596185	0.502889	0.484675	0.488075	0.50637	0.519648	0.573363	0.783582	0.444528	0.568159	0.46246	0.801003	0.399595	0.487361	0.502632	0.482815	0.566023	0.565276	0.642319	0.513616	0.401565	0.650726	0.406655	0.725636	0.667657	0.542059	0.546902	0.501226	0.525442	0.615118	0.477663
	6.19633	0.399493	0.4845	0.563705	0.589613	0.488104	0.55257	0.432024	0.408137	0.413981	0.476891	0.813631	0.546811	0.622597	0.426505	0.462335	0.68632	0.820021	0.587866	0.500351	0.505928	0.47907	0.512911	0.502526	0.559492	0.779186	0.43994	0.555908	0.467664	0.767022	0.394691	0.475826	0.503934	0.4812	0.524784	0.574998	0.635774	0.51962	0.421792	0.616682	0.40127	0.74781	0.644993	0.518781	0.530282	0.488474	0.514901	0.599481	0.473022
	6.2297	0.394886	0.478718	0.579831	0.591285	0.476618	0.563548	0.44468	0.403853	0.40296	0.486861	0.823289	0.538101	0.617214	0.428768	0.458482	0.705922	0.831231	0.586244	0.49127	0.470356	0.482491	0.505636	0.502777	0.574067	0.768665	0.446554	0.552937	0.446229	0.76837	0.395918	0.466487	0.493375	0.474989	0.532549	0.587333	0.627244	0.522677	0.40649	0.623618	0.410711	0.754085	0.650202	0.522548	0.542285	0.451909	0.522542	0.60389	0.498742
	6.26303	0.395211	0.49229	0.562496	0.577371	0.47911	0.551535	0.441217	0.396195	0.406287	0.501205	0.831147	0.541196	0.619671	0.418411	0.469777	0.693645	0.833663	0.595759	0.500333	0.497784	0.488432	0.508362	0.511952	0.564267	0.758746	0.43339	0.55462	0.442728	0.793469	0.390585	0.48334	0.486076	0.490996	0.52553	0.555799	0.612561	0.510391	0.403562	0.60438	0.404412	0.715605	0.644144	0.541352	0.532869	0.460168	0.495061	0.600627	0.475636
	6.29637	0.401962	0.474397	0.552677	0.585968	0.487986	0.55708	0.433167	0.398091	0.39267	0.474305	0.810966	0.549833	0.631085	0.417407	0.458225	0.68874	0.814837	0.587266	0.496117	0.489756	0.468957	0.504345	0.489386	0.566855	0.754971	0.434657	0.549288	0.448044	0.777826	0.388959	0.480408	0.474238	0.490301	0.521781	0.559119	0.610115	0.514233	0.402686	0.616096	0.395129	0.726527	0.654161	0.514919	0.531621	0.453804	0.505162	0.617089	0.476277
	6.3297	0.400903	0.488334	0.569261	0.583339	0.472637	0.546749	0.430797	0.39597	0.387134	0.478287	0.829728	0.544572	0.612598	0.426384	0.452412	0.705612	0.81676	0.575303	0.493504	0.490928	0.488193	0.493342	0.495722	0.557881	0.767934	0.435567	0.563585	0.45245	0.764633	0.393261	0.480081	0.5092	0.484081	0.514851	0.558092	0.615587	0.509293	0.410109	0.624865	0.410329	0.728095	0.629187	0.517891	0.538824	0.454229	0.490017	0.593193	0.478353
	6.36303	0.397729	0.491339	0.558685	0.573495	0.481408	0.558842	0.4386	0.39755	0.39747	0.468557	0.8062	0.544819	0.624084	0.428317	0.449826	0.699874	0.800942	0.574569	0.489438	0.477041	0.478858	0.49558	0.491085	0.554815	0.750557	0.426428	0.55359	0.448028	0.767782	0.385952	0.47168	0.482747	0.477317	0.521107	0.563873	0.604058	0.495109	0.411013	0.608829	0.404795	0.729266	0.632631	0.521359	0.537616	0.449523	0.501789	0.588851	0.494983
	6.39635	0.388665	0.47511	0.555805	0.575282	0.474746	0.552696	0.426359	0.391316	0.401694	0.477771	0.815314	0.54241	0.601624	0.420195	0.450832	0.688273	0.786731	0.581032	0.486756	0.483287	0.460518	0.485922	0.491551	0.534049	0.721857	0.420513	0.549196	0.452134	0.762881	0.385019	0.468937	0.48309	0.475481	0.526266	0.562496	0.606024	0.507155	0.41474	0.620748	0.402724	0.720852	0.643589	0.514204	0.493453	0.458305	0.484056	0.588232	0.473099
	6.4297	0.398995	0.467506	0.538654	0.569118	0.482016	0.548311	0.420689	0.390531	0.391463	0.472992	0.815928	0.521378	0.617586	0.419287	0.451061	0.700339	0.807097	0.578572	0.493688	0.478199	0.47207	0.486725	0.49126	0.557298	0.747569	0.418776	0.556006	0.454637	0.752392	0.390056	0.468669	0.48272	0.466061	0.521299	0.549915	0.610433	0.507321	0.407635	0.612492	0.395163	0.706267	0.630641	0.516233	0.522715	0.453968	0.479606	0.577707	0.455993
	6.46298	0.396435	0.474382	0.541098	0.55696	0.473607	0.542144	0.422358	0.389867	0.391908	0.487488	0.829059	0.531213	0.594854	0.431002	0.448711	0.69502	0.812207	0.563823	0.485251	0.472224	0.458168	0.498307	0.491946	0.555925	0.749071	0.433762	0.548537	0.438613	0.749457	0.388888	0.472948	0.481053	0.465969	0.511085	0.547833	0.610003	0.494458	0.400919	0.617421	0.399949	0.69286	0.620752	0.503441	0.509119	0.440449	0.491853	0.577472	0.460296
	6.49638	0.388858	0.474742	0.533272	0.561536	0.466838	0.546676	0.426957	0.388961	0.393727	0.478974	0.81442	0.54135	0.596866	0.414296	0.439605	0.698612	0.814324	0.548616	0.481074	0.472833	0.446835	0.472946	0.482631	0.529206	0.741019	0.427502	0.549218	0.448835	0.756912	0.384371	0.45204	0.489719	0.462077	0.493677	0.567504	0.582176	0.485338	0.405561	0.596776	0.406576	0.705447	0.623157	0.503207	0.505849	0.458059	0.474905	0.578358	0.461081
	6.52967	0.3938	0.47714	0.540624	0.562648	0.479491	0.543692	0.427683	0.379555	0.390331	0.484768	0.824988	0.52528	0.598291	0.419762	0.455303	0.653805	0.78735	0.580994	0.484457	0.47846	0.472129	0.4853	0.476197	0.54338	0.752107	0.419574	0.551261	0.444233	0.760352	0.384884	0.464675	0.489802	0.46298	0.509086	0.540679	0.618136	0.494022	0.410763	0.593398	0.400732	0.693381	0.616856	0.517224	0.538215	0.450077	0.46526	0.581289	0.456538
	6.563	0.387589	0.474352	0.534987	0.555213	0.474826	0.547918	0.419603	0.388571	0.398026	0.496684	0.805478	0.526662	0.604321	0.426208	0.451451	0.675661	0.789835	0.571579	0.482697	0.474325	0.45098	0.488843	0.495545	0.53806	0.727821	0.416523	0.54617	0.441573	0.741113	0.391754	0.45115	0.489002	0.467729	0.493474	0.539305	0.599752	0.493796	0.408478	0.61131	0.407131	0.7092	0.628384	0.510062	0.527536	0.440073	0.493285	0.581547	0.464937
	6.59635	0.405807	0.476193	0.52335	0.557548	0.477669	0.542102	0.424416	0.391345	0.393159	0.479544	0.811155	0.534642	0.599316	0.42503	0.446498	0.686802	0.784266	0.572491	0.4737	0.479676	0.445544	0.480487	0.478394	0.538909	0.728952	0.406349	0.544341	0.445374	0.734424	0.383442	0.46792	0.485108	0.458611	0.513021	0.555366	0.595222	0.48637	0.407074	0.594156	0.396303	0.693657	0.622693	0.510908	0.519797	0.453873	0.484251	0.574373	0.448851
	6.62967	0.394632	0.465778	0.522189	0.562284	0.47419	0.542278	0.432182	0.38833	0.385958	0.495076	0.799505	0.519077	0.592752	0.422861	0.440677	0.651831	0.802473	0.563453	0.486385	0.457739	0.424823	0.482002	0.476695	0.537204	0.731495	0.417584	0.532894	0.441398	0.752773	0.38066	0.461534	0.477797	0.46704	0.518588	0.542681	0.587853	0.487795	0.401526	0.58354	0.406436	0.70237	0.615728	0.499802	0.501978	0.439009	0.477201	0.572507	0.474208
	6.66302	0.391205	0.461889	0.527011	0.550424	0.468687	0.535723	0.416172	0.377438	0.391566	0.47015	0.802698	0.517065	0.588137	0.421007	0.433597	0.658847	0.788065	0.571443	0.47175	0.460644	0.447024	0.489219	0.476156	0.541619	0.726082	0.411351	0.548176	0.43694	0.712264	0.386014	0.455382	0.47241	0.449281	0.49927	0.547502	0.603581	0.489995	0.41768	0.591476	0.408334	0.69971	0.602205	0.500137	0.47546	0.440845	0.492483	0.55991	0.434206
	6.69635	0.396175	0.47229	0.53232	0.551986	0.44759	0.532513	0.419359	0.385182	0.38303	0.478185	0.794286	0.51024	0.602622	0.418657	0.460196	0.63482	0.785472	0.550121	0.486423	0.475959	0.46306	0.486032	0.469336	0.531881	0.717972	0.41287	0.540261	0.444648	0.740584	0.387675	0.471006	0.479949	0.462167	0.502395	0.52228	0.596053	0.47654	0.399348	0.573357	0.407179	0.699968	0.627902	0.499804	0.526145	0.427454	0.49127	0.575326	0.456751
	6.72968	0.384474	0.460504	0.513978	0.525379	0.462636	0.530427	0.426788	0.380214	0.372712	0.477652	0.77687	0.521232	0.587479	0.415728	0.440594	0.66054	0.787738	0.548835	0.474631	0.45268	0.449654	0.478342	0.477313	0.531244	0.719307	0.413891	0.536129	0.429308	0.709844	0.385733	0.452135	0.478314	0.449509	0.48678	0.525864	0.585664	0.490835	0.402758	0.569506	0.401031	0.686816	0.584187	0.503001	0.493152	0.437973	0.473537	0.566078	0.444507
	6.76305	0.381566	0.452861	0.511849	0.538074	0.457618	0.537713	0.414614	0.384677	0.381814	0.482304	0.786132	0.501631	0.580674	0.430712	0.449621	0.658149	0.786249	0.549572	0.478662	0.462076	0.436379	0.474977	0.462128	0.541185	0.697845	0.408727	0.538577	0.439191	0.718344	0.382937	0.450291	0.481326	0.453901	0.505023	0.527778	0.592539	0.465506	0.397175	0.585501	0.401159	0.703217	0.602938	0.487559	0.494919	0.417229	0.482988	0.565572	0.456028
	6.79635	0.381241	0.464858	0.52296	0.53692	0.448196	0.523033	0.403384	0.389003	0.384888	0.477649	0.775777	0.504591	0.593205	0.421502	0.445979	0.642907	0.785534	0.557144	0.466983	0.458485	0.439543	0.462366	0.473943	0.527524	0.719337	0.417061	0.549486	0.437416	0.719909	0.383284	0.44854	0.484941	0.451573	0.498806	0.527842	0.587333	0.485919	0.389789	0.584638	0.400367	0.66604	0.596092	0.468399	0.518924	0.424807	0.470924	0.567562	0.458416
	6.8297	0.385478	0.460333	0.513649	0.542065	0.454042	0.531406	0.425936	0.380521	0.381222	0.463561	0.782738	0.514252	0.58716	0.412885	0.43454	0.644172	0.779656	0.552415	0.470249	0.465954	0.443865	0.473664	0.465927	0.529315	0.70274	0.409546	0.536615	0.435303	0.721523	0.385023	0.436539	0.481277	0.456126	0.495798	0.537906	0.575932	0.47648	0.387451	0.573559	0.392763	0.681977	0.604169	0.484303	0.529489	0.433054	0.463782	0.554776	0.457262
	6.86303	0.379873	0.454456	0.518679	0.530658	0.448924	0.512572	0.413652	0.380366	0.374586	0.464948	0.779181	0.51412	0.58297	0.412571	0.447434	0.643554	0.762365	0.561509	0.473811	0.450444	0.44909	0.465831	0.463152	0.522263	0.697913	0.416268	0.542254	0.431273	0.745311	0.373184	0.459	0.4703	0.447977	0.501963	0.533258	0.566282	0.468008	0.386034	0.585969	0.394174	0.677281	0.59462	0.480908	0.517148	0.429562	0.455052	0.553906	0.466079
	6.89637	0.392646	0.461731	0.510592	0.538258	0.461698	0.519312	0.412384	0.372614	0.383375	0.457372	0.781207	0.50421	0.585145	0.409679	0.426088	0.640518	0.781435	0.54771	0.471219	0.462293	0.443789	0.46493	0.454076	0.518575	0.703271	0.409662	0.535712	0.434095	0.715021	0.376481	0.448789	0.491362	0.446104	0.495062	0.524394	0.578459	0.482731	0.381837	0.581804	0.388737	0.675893	0.612274	0.476307	0.494994	0.446818	0.461547	0.55124	0.450197
	6.9297	0.383306	0.453993	0.514872	0.516987	0.466011	0.517194	0.408258	0.370934	0.377386	0.48041	0.782497	0.493569	0.575222	0.417429	0.4474	0.644158	0.757281	0.530682	0.466431	0.447316	0.423301	0.461442	0.454011	0.503983	0.705256	0.405246	0.525441	0.431128	0.713171	0.384351	0.446817	0.473184	0.439171	0.514314	0.529827	0.580312	0.481	0.389019	0.584344	0.394324	0.661368	0.593708	0.47296	0.498587	0.435865	0.455896	0.553225	0.448152
	6.963	0.393718	0.459304	0.491119	0.520817	0.474676	0.516335	0.420432	0.373246	0.382046	0.467389	0.779248	0.494963	0.581545	0.409607	0.429574	0.639693	0.749368	0.531622	0.477897	0.463366	0.444902	0.462024	0.459413	0.532098	0.694236	0.398754	0.532158	0.428284	0.728583	0.382802	0.453994	0.483949	0.444861	0.497213	0.519094	0.587076	0.472698	0.385108	0.570616	0.402067	0.670403	0.602295	0.463138	0.48474	0.430252	0.459085	0.557412	0.456413
	6.99635	0.386812	0.468003	0.511986	0.520707	0.460916	0.520305	0.411951	0.37138	0.379459	0.456855	0.752023	0.492312	0.573617	0.418982	0.427919	0.635322	0.761234	0.535629	0.459111	0.447122	0.429334	0.465046	0.455158	0.52337	0.712601	0.399255	0.535331	0.421692	0.693915	0.374707	0.452368	0.479125	0.431491	0.483428	0.524435	0.573306	0.462226	0.389104	0.583677	0.399665	0.666888	0.587786	0.469591	0.476896	0.428802	0.459188	0.547085	0.457042
	7.02968	0.392575	0.456257	0.513344	0.514502	0.461864	0.511882	0.414925	0.369778	0.378442	0.47436	0.766318	0.481594	0.584539	0.407191	0.442621	0.648108	0.744885	0.53361	0.463853	0.443636	0.46371	0.462179	0.435862	0.509919	0.70542	0.42867	0.522598	0.426313	0.716789	0.38023	0.44447	0.46395	0.442687	0.499178	0.524736	0.55045	0.46331	0.384205	0.56457	0.40099	0.668097	0.599245	0.46029	0.472049	0.420115	0.459768	0.542053	0.440294
	7.06303	0.3778	0.44232	0.489102	0.511396	0.453282	0.505199	0.409609	0.368514	0.376528	0.455255	0.764681	0.487684	0.574873	0.397971	0.420885	0.645032	0.730118	0.536629	0.463237	0.444548	0.417013	0.4562	0.438434	0.501061	0.70626	0.395996	0.511912	0.427048	0.69304	0.375262	0.443962	0.464734	0.427754	0.48687	0.504332	0.578749	0.460344	0.386193	0.570075	0.396246	0.64378	0.579461	0.458755	0.46802	0.427735	0.453083	0.526367	0.439674
	7.09638	0.394843	0.446566	0.496064	0.51114	0.454012	0.517709	0.407564	0.375179	0.3761	0.460952	0.75461	0.484251	0.575183	0.408988	0.430284	0.624812	0.742684	0.527231	0.450065	0.438395	0.424556	0.448845	0.454403	0.510481	0.706758	0.384919	0.519303	0.422939	0.701986	0.378365	0.435861	0.4588	0.435346	0.487638	0.526091	0.571673	0.462729	0.387021	0.569467	0.393966	0.656922	0.576573	0.476405	0.471015	0.433271	0.442906	0.543563	0.428208
	7.1297	0.379469	0.461606	0.495322	0.508169	0.442631	0.506533	0.413499	0.362852	0.361126	0.455428	0.750117	0.482292	0.562573	0.408648	0.433155	0.634959	0.747295	0.521425	0.466689	0.428267	0.445977	0.45745	0.450923	0.502095	0.702653	0.3873	0.52406	0.418545	0.696744	0.381138	0.435289	0.473213	0.433403	0.494131	0.522412	0.563264	0.464895	0.379885	0.560448	0.390055	0.663765	0.578797	0.473749	0.476413	0.420197	0.451636	0.533651	0.438294
	7.16303	0.387628	0.454064	0.489883	0.503914	0.446372	0.501556	0.400287	0.367683	0.367466	0.447814	0.744302	0.477595	0.563263	0.408555	0.413987	0.62428	0.756575	0.524585	0.446939	0.438067	0.4163	0.436671	0.435108	0.486908	0.679042	0.38588	0.515296	0.421767	0.717728	0.384523	0.437882	0.466367	0.429216	0.49569	0.50634	0.554527	0.454585	0.382179	0.580652	0.403776	0.633706	0.580847	0.494046	0.476361	0.433363	0.466959	0.528647	0.451462
	7.19637	0.380854	0.439071	0.484227	0.504862	0.430857	0.495303	0.402338	0.374019	0.369417	0.456294	0.741929	0.488939	0.568024	0.411872	0.424817	0.635068	0.728269	0.520012	0.454683	0.455096	0.447958	0.445812	0.438494	0.497881	0.688283	0.397738	0.505041	0.417111	0.681519	0.378299	0.44003	0.455028	0.431048	0.505225	0.511822	0.545131	0.453413	0.37455	0.567957	0.393649	0.654645	0.55959	0.459254	0.486074	0.43433	0.455216	0.531499	0.429026
	7.22968	0.373331	0.444616	0.484072	0.512	0.464778	0.508613	0.403692	0.365512	0.36897	0.45065	0.738355	0.478502	0.575926	0.410459	0.424772	0.624614	0.737301	0.517046	0.4525	0.43851	0.411806	0.44659	0.43423	0.494637	0.696516	0.39436	0.517294	0.422285	0.685293	0.382861	0.43315	0.471758	0.438739	0.512141	0.50492	0.566001	0.455603	0.387564	0.564477	0.386696	0.637347	0.587505	0.463464	0.473657	0.430442	0.446377	0.531858	0.446397
	7.26303	0.377323	0.454217	0.487328	0.499197	0.449856	0.514414	0.409381	0.359758	0.374117	0.449085	0.743771	0.478888	0.576088	0.399572	0.435342	0.621411	0.744098	0.520272	0.455234	0.438843	0.429757	0.4454	0.425801	0.507652	0.688126	0.393583	0.504271	0.422534	0.70826	0.378118	0.437436	0.469325	0.430132	0.49418	0.508016	0.54562	0.449494	0.384837	0.554216	0.391633	0.641923	0.568502	0.470675	0.473773	0.432396	0.451315	0.537862	0.41762
	7.29635	0.368303	0.438726	0.477506	0.494261	0.443074	0.505544	0.402207	0.359453	0.367048	0.441605	0.746754	0.480015	0.56233	0.406425	0.408397	0.612574	0.709263	0.515435	0.442	0.423649	0.426853	0.449915	0.430582	0.504224	0.676289	0.395499	0.503716	0.426063	0.693876	0.379362	0.425305	0.455705	0.425035	0.48693	0.499276	0.54189	0.450962	0.370018	0.551077	0.388962	0.635484	0.56076	0.455904	0.480948	0.421912	0.432012	0.51939	0.434568
	7.32967	0.387338	0.452453	0.483147	0.497558	0.453951	0.512586	0.400334	0.36822	0.371427	0.449237	0.753587	0.476477	0.571486	0.406017	0.427534	0.602599	0.731928	0.509032	0.455872	0.436025	0.423574	0.447401	0.447309	0.501892	0.694809	0.392594	0.510191	0.419344	0.699754	0.381541	0.436744	0.473344	0.436214	0.499225	0.523462	0.544534	0.463501	0.378308	0.564184	0.389508	0.668562	0.564329	0.469538	0.482328	0.420015	0.442397	0.531961	0.431103
	7.363	0.379196	0.4456	0.479551	0.493146	0.438114	0.496228	0.399141	0.362044	0.373936	0.452661	0.748708	0.46785	0.569754	0.405408	0.407402	0.618516	0.718261	0.496852	0.454045	0.427345	0.410783	0.434648	0.439864	0.483713	0.684846	0.39017	0.511611	0.416462	0.694335	0.383493	0.43944	0.471026	0.441648	0.486058	0.506101	0.548207	0.437817	0.369049	0.551357	0.395567	0.633915	0.573093	0.463216	0.491812	0.413016	0.452657	0.533872	0.454536
	7.39637	0.381107	0.426323	0.463551	0.491654	0.438896	0.494735	0.39716	0.357379	0.361567	0.441527	0.739625	0.47011	0.562941	0.402279	0.423756	0.60588	0.72857	0.511999	0.439863	0.429672	0.409245	0.435648	0.431946	0.492869	0.6852	0.380728	0.498362	0.425366	0.688698	0.380977	0.427388	0.461072	0.425656	0.493609	0.509182	0.545038	0.441762	0.399332	0.549409	0.389189	0.629818	0.540118	0.46331	0.452267	0.420064	0.428553	0.521163	0.418898
	7.4297	0.383211	0.442899	0.476284	0.495856	0.422365	0.501574	0.404611	0.365557	0.360362	0.440872	0.749535	0.483758	0.557829	0.404079	0.423141	0.606042	0.729894	0.519648	0.457493	0.430958	0.42068	0.434763	0.429567	0.495687	0.678064	0.396091	0.505668	0.420924	0.69682	0.377683	0.432935	0.458223	0.427872	0.494134	0.500697	0.558986	0.438863	0.376803	0.553912	0.390382	0.635241	0.56073	0.458165	0.472388	0.431859	0.440534	0.519914	0.412984
	7.46303	0.37933	0.448148	0.476397	0.493588	0.445953	0.496934	0.402663	0.364361	0.36099	0.456125	0.714922	0.470749	0.562204	0.400737	0.428205	0.615709	0.734495	0.514885	0.444282	0.440256	0.411953	0.443389	0.433952	0.476109	0.688478	0.390296	0.501882	0.422113	0.673199	0.376942	0.43291	0.453648	0.430228	0.482378	0.484418	0.553212	0.437187	0.373567	0.541816	0.398259	0.637763	0.559776	0.465956	0.458705	0.427881	0.430204	0.505894	0.425641
	7.49637	0.37839	0.437591	0.470503	0.486768	0.436375	0.486449	0.407485	0.365796	0.36007	0.44153	0.739156	0.467458	0.557755	0.403681	0.410398	0.61124	0.713383	0.49823	0.438947	0.422548	0.425685	0.431663	0.424607	0.476556	0.679542	0.381432	0.497123	0.414989	0.687083	0.377603	0.430083	0.463615	0.419635	0.490993	0.495961	0.538734	0.445606	0.375239	0.549312	0.378345	0.628862	0.53779	0.446026	0.450449	0.425181	0.459134	0.52005	0.408102
	7.52972	0.370929	0.428385	0.469037	0.478543	0.431368	0.4846	0.399531	0.361081	0.35765	0.441895	0.735803	0.461351	0.558795	0.398645	0.415882	0.597206	0.709719	0.49305	0.433625	0.426352	0.421904	0.427775	0.415163	0.495521	0.672622	0.397249	0.496282	0.413376	0.656429	0.382883	0.430014	0.475791	0.419071	0.473811	0.503398	0.542917	0.44197	0.382698	0.550074	0.395624	0.62569	0.554391	0.453592	0.481031	0.420087	0.419838	0.497174	0.425808
	7.56302	0.374626	0.43614	0.480419	0.481103	0.423655	0.49315	0.39676	0.363742	0.35898	0.440433	0.723393	0.469146	0.570485	0.390284	0.419868	0.594783	0.732584	0.497215	0.441486	0.417702	0.407313	0.43693	0.419214	0.481115	0.673712	0.389225	0.489782	0.41884	0.670895	0.383278	0.419939	0.467841	0.423854	0.48327	0.485942	0.543915	0.437991	0.372135	0.538291	0.399667	0.620822	0.527613	0.445748	0.490151	0.421091	0.421438	0.51704	0.413675
	7.59637	0.377569	0.43283	0.473134	0.483009	0.438737	0.489575	0.401968	0.358596	0.363359	0.446062	0.717942	0.468032	0.564816	0.39159	0.397957	0.5784	0.718481	0.509348	0.439683	0.413089	0.411348	0.424389	0.431777	0.47947	0.67338	0.384807	0.490655	0.410165	0.657857	0.379387	0.41991	0.458679	0.424028	0.480123	0.486541	0.539645	0.436071	0.373603	0.53248	0.382854	0.621582	0.539764	0.43308	0.464391	0.408429	0.424894	0.50684	0.426321
	7.62968	0.376423	0.434852	0.460335	0.469972	0.430699	0.492757	0.395763	0.355461	0.358356	0.441473	0.715334	0.459559	0.559156	0.399071	0.417835	0.585597	0.689611	0.497591	0.437174	0.417511	0.392316	0.435569	0.418801	0.482274	0.667629	0.390352	0.493695	0.411845	0.642591	0.376501	0.426391	0.459804	0.420026	0.485117	0.488109	0.529281	0.436091	0.368141	0.546056	0.37616	0.601897	0.55312	0.443434	0.446744	0.422315	0.427382	0.507066	0.436178
	7.66297	0.371556	0.429769	0.469071	0.480364	0.428558	0.48043	0.393916	0.357523	0.362409	0.430557	0.707176	0.457563	0.551261	0.389545	0.406714	0.584372	0.712654	0.503614	0.426926	0.410978	0.404279	0.426102	0.420411	0.480336	0.651285	0.386912	0.492555	0.41558	0.635135	0.372334	0.423101	0.443539	0.42618	0.468881	0.492307	0.526046	0.433724	0.363594	0.525103	0.373041	0.609111	0.536712	0.436229	0.463049	0.414981	0.437635	0.511186	0.411209
	7.69635	0.37178	0.439922	0.462114	0.477509	0.421472	0.488421	0.400151	0.363694	0.359435	0.430245	0.714496	0.470871	0.55778	0.398407	0.415808	0.600025	0.706839	0.490614	0.439897	0.421358	0.410616	0.427934	0.422688	0.480319	0.654263	0.392303	0.491452	0.411749	0.646461	0.371957	0.422795	0.459261	0.422644	0.475839	0.484854	0.541489	0.444277	0.376172	0.511774	0.383586	0.620667	0.531917	0.440645	0.449583	0.401777	0.442074	0.503537	0.413957
	7.72968	0.376654	0.430712	0.46029	0.489701	0.423509	0.475627	0.392401	0.363016	0.350623	0.426077	0.716964	0.459313	0.549441	0.401332	0.422614	0.591662	0.691418	0.49628	0.423912	0.422642	0.416337	0.425763	0.41912	0.481663	0.668031	0.373951	0.493029	0.414031	0.653295	0.372064	0.423819	0.45912	0.414987	0.483979	0.491448	0.537389	0.433958	0.356024	0.53153	0.373974	0.602216	0.531432	0.438084	0.467315	0.40426	0.436	0.507838	0.421536
	7.76302	0.38266	0.428775	0.457814	0.47037	0.426548	0.481418	0.396411	0.354919	0.362036	0.44223	0.71639	0.463275	0.561846	0.393717	0.410714	0.569789	0.706982	0.484451	0.434499	0.424994	0.40653	0.429237	0.414424	0.472997	0.655537	0.376133	0.486125	0.406792	0.650339	0.377738	0.42523	0.469838	0.413821	0.48436	0.485716	0.529376	0.437935	0.369888	0.525669	0.383168	0.603291	0.524979	0.43784	0.467692	0.421495	0.431358	0.50123	0.401851
	7.79633	0.366694	0.425857	0.458581	0.473842	0.419121	0.479088	0.395198	0.357759	0.364477	0.429514	0.69116	0.458674	0.559961	0.387832	0.420047	0.571599	0.69066	0.494333	0.440586	0.419605	0.40848	0.429442	0.412792	0.465161	0.650066	0.382701	0.490163	0.406717	0.644633	0.378146	0.421633	0.456089	0.409658	0.478888	0.480267	0.524777	0.43107	0.367416	0.521833	0.376262	0.603992	0.526701	0.439293	0.474096	0.415803	0.419472	0.507978	0.414764
	7.8297	0.374849	0.428073	0.462928	0.475252	0.444384	0.482232	0.396707	0.349609	0.357878	0.429432	0.73283	0.460669	0.554182	0.392691	0.408974	0.588609	0.697288	0.486645	0.427825	0.410258	0.407001	0.428405	0.420699	0.474057	0.669195	0.381639	0.489487	0.40956	0.640374	0.374782	0.41655	0.456963	0.414169	0.473479	0.495175	0.520982	0.439348	0.370737	0.533664	0.389456	0.595764	0.51683	0.438118	0.449926	0.407121	0.43015	0.489503	0.445876
	7.86302	0.373383	0.41526	0.469788	0.465161	0.426257	0.483372	0.383698	0.361127	0.360642	0.428389	0.7025	0.456137	0.55071	0.397707	0.398627	0.580645	0.681646	0.482102	0.426194	0.415259	0.387222	0.425289	0.417763	0.463739	0.643869	0.384685	0.483334	0.402143	0.657833	0.377632	0.416548	0.441744	0.418339	0.49385	0.490039	0.516437	0.424452	0.360116	0.520081	0.372375	0.609945	0.524861	0.437939	0.454522	0.411936	0.420239	0.502114	0.425975
	7.89635	0.375635	0.43145	0.456882	0.471039	0.426235	0.478215	0.394228	0.353776	0.362921	0.423838	0.726057	0.453314	0.550383	0.398706	0.430776	0.582499	0.699564	0.4849	0.427535	0.419172	0.403543	0.423211	0.403887	0.468014	0.656966	0.385345	0.494296	0.407895	0.659071	0.374831	0.418258	0.437467	0.413069	0.501933	0.485916	0.54143	0.427084	0.373122	0.541899	0.378459	0.588583	0.519214	0.446676	0.474187	0.417371	0.403769	0.492738	0.409698
	7.9297	0.375515	0.426042	0.463399	0.478237	0.428114	0.483526	0.395632	0.353941	0.35008	0.424379	0.701405	0.45685	0.551793	0.390765	0.408139	0.582895	0.678772	0.479223	0.430917	0.416897	0.408652	0.427455	0.417364	0.461679	0.661295	0.384633	0.47414	0.407018	0.63585	0.376227	0.414636	0.462649	0.410441	0.487299	0.476661	0.532577	0.436587	0.359556	0.520069	0.374286	0.608194	0.522927	0.432598	0.481055	0.410715	0.420408	0.494397	0.421997
	7.96302	0.372569	0.417465	0.464576	0.46795	0.425617	0.464981	0.391747	0.352463	0.352986	0.424229	0.710549	0.45812	0.555306	0.394608	0.414803	0.575993	0.673991	0.486926	0.424503	0.408419	0.398442	0.419155	0.413854	0.467257	0.652587	0.392521	0.47353	0.405652	0.651198	0.375261	0.413144	0.458033	0.419564	0.500637	0.47466	0.52116	0.422807	0.371293	0.516936	0.386024	0.606336	0.515344	0.422467	0.474807	0.398489	0.427645	0.492655	0.420277
	7.99635	0.362612	0.420285	0.4549	0.453294	0.437509	0.462895	0.38144	0.353858	0.350228	0.414304	0.711569	0.444761	0.558864	0.394241	0.413678	0.573991	0.651049	0.476687	0.416703	0.420854	0.395523	0.421569	0.403847	0.47252	0.632806	0.37477	0.475047	0.399567	0.641716	0.366814	0.406446	0.452359	0.404952	0.482586	0.485228	0.533482	0.414674	0.378266	0.529801	0.378887	0.598226	0.51946	0.414127	0.451976	0.398287	0.420349	0.482164	0.420214
	8.02967	0.375951	0.428981	0.456749	0.461402	0.418002	0.46788	0.389224	0.358467	0.359476	0.423299	0.705504	0.459467	0.547947	0.402244	0.41277	0.581911	0.668089	0.473231	0.428189	0.418033	0.396252	0.422426	0.401318	0.4662	0.649832	0.387052	0.483152	0.405936	0.659985	0.374327	0.428047	0.439687	0.40948	0.485305	0.491598	0.52758	0.41823	0.368312	0.522116	0.377078	0.594505	0.514114	0.424429	0.47071	0.402454	0.417285	0.484281	0.393425
	8.063	0.36634	0.432295	0.458267	0.463113	0.436553	0.45704	0.383319	0.358378	0.354229	0.433451	0.699479	0.443294	0.538679	0.392384	0.407561	0.583512	0.687494	0.471432	0.419105	0.411102	0.398092	0.418947	0.404945	0.455525	0.645176	0.386219	0.477073	0.404402	0.649976	0.368923	0.415609	0.445885	0.404421	0.488119	0.488666	0.529241	0.413617	0.365066	0.512017	0.384998	0.597237	0.506698	0.425872	0.476248	0.410199	0.410313	0.494201	0.419095
	8.09635	0.362677	0.42452	0.453316	0.460529	0.404612	0.457208	0.380072	0.346732	0.349862	0.410491	0.68324	0.436467	0.549389	0.397388	0.405288	0.555924	0.661622	0.476963	0.418383	0.40962	0.394568	0.409224	0.409295	0.464124	0.635301	0.38054	0.465808	0.400189	0.615627	0.36999	0.414678	0.443857	0.400778	0.47409	0.477551	0.493912	0.420061	0.362506	0.51344	0.374535	0.596789	0.504675	0.417104	0.477476	0.402782	0.422293	0.480509	0.409254
	8.1297	0.378142	0.416101	0.466255	0.464897	0.41525	0.461475	0.387296	0.352024	0.351282	0.435077	0.708593	0.448587	0.554592	0.39683	0.41285	0.572176	0.662592	0.481094	0.42657	0.406031	0.418667	0.418905	0.407451	0.472579	0.630313	0.391971	0.482087	0.400257	0.645604	0.372327	0.405095	0.443726	0.403317	0.481778	0.480223	0.523942	0.420716	0.358832	0.508681	0.372463	0.582979	0.515592	0.416507	0.483142	0.397988	0.423502	0.470214	0.401235
	8.16302	0.372851	0.409876	0.471682	0.465348	0.435696	0.462197	0.383364	0.35157	0.361477	0.434439	0.71244	0.448189	0.540738	0.399957	0.413549	0.546455	0.66155	0.46636	0.414296	0.403854	0.390408	0.413981	0.402561	0.459865	0.634933	0.380629	0.46255	0.408594	0.638207	0.379403	0.418672	0.460464	0.410409	0.490866	0.477796	0.526689	0.416713	0.360817	0.5101	0.383817	0.601017	0.512889	0.425298	0.459721	0.417119	0.407409	0.49301	0.407025
	8.19635	0.373778	0.423365	0.46781	0.454347	0.418723	0.457835	0.374582	0.353453	0.350238	0.415446	0.704899	0.447871	0.544735	0.391646	0.399706	0.56303	0.644837	0.474942	0.424586	0.404595	0.389105	0.412081	0.399187	0.444147	0.616653	0.388218	0.466121	0.402056	0.639318	0.374549	0.410066	0.443459	0.406915	0.463956	0.47029	0.520134	0.417901	0.37124	0.506325	0.388543	0.588517	0.509256	0.413442	0.44901	0.399454	0.414595	0.470782	0.416979
	8.2297	0.366746	0.427314	0.461708	0.456934	0.418167	0.463461	0.384467	0.348822	0.343657	0.425238	0.697491	0.444774	0.535201	0.381794	0.39361	0.543955	0.626856	0.461732	0.409714	0.401735	0.379115	0.415431	0.411647	0.448852	0.628883	0.385937	0.471221	0.40234	0.62694	0.36467	0.406024	0.438467	0.398528	0.489586	0.471916	0.50512	0.419708	0.35846	0.507863	0.367883	0.592144	0.500145	0.410174	0.458286	0.398853	0.408027	0.488784	0.407119
	8.26297	0.366773	0.413173	0.446195	0.446945	0.412369	0.451037	0.378157	0.343702	0.350974	0.410354	0.699583	0.439383	0.536987	0.393729	0.40673	0.527251	0.655399	0.466955	0.407049	0.40298	0.385892	0.41856	0.397973	0.450041	0.614237	0.372647	0.466776	0.393992	0.622912	0.370138	0.406222	0.444285	0.391104	0.471702	0.465746	0.509288	0.410888	0.356151	0.502936	0.373231	0.568301	0.507083	0.415111	0.45847	0.398475	0.397163	0.474704	0.397835
	8.29635	0.370238	0.42945	0.452279	0.45111	0.421705	0.461447	0.379353	0.351952	0.358533	0.428777	0.712179	0.434002	0.547215	0.395724	0.405026	0.550598	0.653464	0.46192	0.42542	0.405825	0.393597	0.412126	0.40306	0.452879	0.633319	0.375907	0.468309	0.406846	0.637774	0.37916	0.40678	0.451363	0.392818	0.480865	0.468584	0.51498	0.408231	0.362825	0.518471	0.389315	0.58486	0.507139	0.419802	0.455464	0.397158	0.409551	0.475418	0.410118
	8.32968	0.372601	0.408461	0.456702	0.445157	0.406003	0.447958	0.38337	0.352701	0.346664	0.407297	0.680496	0.437108	0.542453	0.384398	0.407019	0.537989	0.643384	0.453779	0.403865	0.396549	0.377964	0.406463	0.39495	0.463439	0.621248	0.385592	0.472914	0.394078	0.61753	0.367985	0.406728	0.445282	0.403531	0.469602	0.461078	0.506963	0.424259	0.358895	0.501978	0.376607	0.570144	0.499007	0.412096	0.468178	0.394392	0.411044	0.481441	0.420601
	8.36303	0.362731	0.415901	0.441541	0.445803	0.412115	0.46092	0.379901	0.346375	0.355527	0.407913	0.685494	0.436845	0.543546	0.38002	0.401283	0.535142	0.655469	0.457707	0.414257	0.406316	0.390689	0.41632	0.395529	0.460735	0.624725	0.382785	0.470012	0.401969	0.622044	0.365699	0.404807	0.438249	0.394451	0.466287	0.477198	0.51818	0.414898	0.369711	0.506798	0.373409	0.580832	0.50222	0.412708	0.453587	0.399919	0.404614	0.479261	0.419458
	8.39637	0.367229	0.414155	0.438381	0.446896	0.403212	0.455071	0.394149	0.352778	0.347291	0.420692	0.68617	0.43856	0.537983	0.395076	0.410729	0.539318	0.634992	0.456995	0.4135	0.415459	0.39109	0.408708	0.395696	0.452697	0.614193	0.370579	0.460277	0.40543	0.633004	0.378622	0.409466	0.440714	0.403737	0.465521	0.457173	0.518822	0.408308	0.363588	0.498834	0.378327	0.581287	0.50896	0.413428	0.457184	0.405894	0.411	0.477685	0.412452
	8.42972	0.36298	0.414621	0.449779	0.450314	0.405917	0.447015	0.378431	0.347304	0.351245	0.41204	0.676584	0.429082	0.537743	0.39859	0.404565	0.541725	0.618692	0.459153	0.400456	0.393486	0.379265	0.397427	0.386748	0.442582	0.609311	0.36377	0.474382	0.40321	0.640331	0.372054	0.404491	0.435307	0.399861	0.482688	0.474409	0.500154	0.407254	0.363585	0.49955	0.376972	0.566826	0.499707	0.413703	0.474105	0.404422	0.398434	0.482548	0.398411
	8.46305	0.370373	0.417814	0.446724	0.458226	0.402445	0.456644	0.393442	0.350718	0.34475	0.413753	0.690911	0.439909	0.537538	0.390628	0.396459	0.545516	0.63548	0.455229	0.405797	0.393395	0.3803	0.409256	0.396307	0.45241	0.632552	0.39191	0.465102	0.401651	0.62526	0.371	0.398048	0.447302	0.398615	0.484394	0.467146	0.525484	0.430177	0.370625	0.498524	0.380622	0.558036	0.486283	0.404755	0.447483	0.400762	0.409822	0.460356	0.422363
	8.49638	0.368572	0.414951	0.452197	0.438206	0.404049	0.436438	0.379246	0.347792	0.340492	0.403064	0.691613	0.438484	0.534323	0.392094	0.410526	0.538742	0.609463	0.452547	0.397703	0.406325	0.387992	0.409179	0.393196	0.429138	0.613868	0.372564	0.477352	0.39704	0.615663	0.372532	0.405263	0.4542	0.401631	0.475027	0.453421	0.505043	0.398801	0.355975	0.486005	0.368747	0.566321	0.498611	0.403133	0.462283	0.391163	0.40038	0.47419	0.409986
	8.5297	0.359822	0.397255	0.435527	0.433934	0.40759	0.438526	0.383529	0.349834	0.337618	0.406051	0.655929	0.428685	0.528927	0.385595	0.400121	0.508807	0.633361	0.460126	0.401378	0.399009	0.371236	0.406059	0.390796	0.449035	0.590685	0.38163	0.466748	0.408743	0.613466	0.367833	0.406008	0.457796	0.38739	0.456402	0.452993	0.503799	0.410902	0.370342	0.484661	0.372373	0.556976	0.485724	0.417167	0.445101	0.401205	0.396706	0.470969	0.390152
	8.563	0.361819	0.40052	0.437063	0.44194	0.411875	0.447929	0.388697	0.347798	0.3481	0.406882	0.674443	0.43677	0.539539	0.384366	0.39753	0.52132	0.612338	0.457521	0.400995	0.403642	0.36908	0.411071	0.391684	0.448064	0.585739	0.383036	0.467576	0.394964	0.603907	0.370699	0.402245	0.440213	0.393968	0.46964	0.474219	0.496483	0.409786	0.365257	0.502078	0.373616	0.551522	0.496151	0.420451	0.449058	0.399253	0.410219	0.458556	0.395276
	8.59638	0.373242	0.411475	0.455398	0.435366	0.412853	0.446443	0.377937	0.344199	0.34462	0.420412	0.660514	0.431856	0.540597	0.385964	0.396403	0.522753	0.616645	0.454479	0.40763	0.40515	0.377453	0.399721	0.385042	0.441657	0.591217	0.376311	0.467916	0.393077	0.59944	0.367584	0.400144	0.432072	0.386598	0.487624	0.462754	0.505092	0.411941	0.353346	0.494693	0.366984	0.548586	0.488366	0.401234	0.448354	0.382465	0.391436	0.475123	0.407891
	8.6297	0.353767	0.396147	0.447014	0.433006	0.425178	0.43379	0.37537	0.343567	0.348144	0.408899	0.67372	0.418711	0.522129	0.382585	0.400341	0.51826	0.612467	0.449323	0.400785	0.404965	0.376942	0.389696	0.39172	0.439163	0.592044	0.371815	0.458719	0.396871	0.618366	0.365082	0.398922	0.437208	0.388252	0.477542	0.464177	0.507164	0.394775	0.357502	0.477769	0.371898	0.569241	0.480298	0.407858	0.461913	0.41774	0.40496	0.453887	0.377969
	8.663	0.368202	0.396435	0.449136	0.430603	0.415444	0.449283	0.379781	0.350263	0.352011	0.409423	0.677878	0.427812	0.536538	0.37836	0.404183	0.517401	0.615364	0.433338	0.397982	0.406336	0.385507	0.409145	0.393357	0.443959	0.604833	0.377892	0.469476	0.406503	0.613333	0.373094	0.395884	0.433186	0.397048	0.469623	0.452979	0.496817	0.407617	0.365901	0.502705	0.36966	0.558591	0.494499	0.420278	0.447327	0.401899	0.395884	0.460953	0.397325
	8.69637	0.372346	0.407446	0.450654	0.443835	0.398979	0.441085	0.385189	0.344737	0.344944	0.399639	0.680558	0.424676	0.530504	0.395467	0.401765	0.509405	0.635135	0.444748	0.403888	0.406011	0.372001	0.402943	0.390659	0.438739	0.596218	0.376079	0.46362	0.398007	0.62011	0.373767	0.403246	0.434966	0.386911	0.458462	0.450761	0.499588	0.4219	0.366115	0.491896	0.378324	0.541016	0.500208	0.402881	0.461433	0.390204	0.386933	0.457807	0.400677
	8.72965	0.367173	0.408399	0.444335	0.43552	0.419195	0.446752	0.380559	0.345168	0.348335	0.416166	0.667212	0.430978	0.536505	0.386738	0.398731	0.515849	0.59988	0.455056	0.402738	0.408997	0.366538	0.392719	0.394614	0.450758	0.598991	0.380506	0.465041	0.392451	0.594904	0.369284	0.404501	0.429863	0.391641	0.466083	0.459367	0.502568	0.406131	0.366775	0.491699	0.373557	0.549373	0.468164	0.40004	0.465067	0.393469	0.397695	0.452258	0.402777
	8.76303	0.361872	0.400988	0.437306	0.438837	0.403323	0.43102	0.376753	0.344049	0.34611	0.403592	0.667379	0.423746	0.520258	0.388772	0.394346	0.513276	0.606357	0.434647	0.397678	0.394219	0.377437	0.399154	0.387169	0.434036	0.587667	0.363456	0.453401	0.393021	0.605982	0.364002	0.408766	0.431872	0.394731	0.463292	0.454816	0.486836	0.396379	0.357077	0.492705	0.363651	0.536301	0.478916	0.406403	0.444027	0.408729	0.402628	0.462385	0.371392
	8.79635	0.351017	0.405293	0.433721	0.424759	0.404838	0.435825	0.382352	0.340486	0.344592	0.396489	0.666238	0.418735	0.524801	0.37788	0.386601	0.528301	0.603804	0.451897	0.396298	0.396444	0.379708	0.393878	0.375782	0.433566	0.600061	0.373946	0.457493	0.396567	0.583041	0.36894	0.397707	0.447583	0.384463	0.443029	0.451498	0.490503	0.40781	0.35579	0.481434	0.377363	0.542345	0.471957	0.410001	0.459685	0.403908	0.389344	0.438774	0.383882
	8.8297	0.362826	0.393125	0.439045	0.431751	0.416267	0.427686	0.37178	0.345159	0.337944	0.390683	0.671909	0.424717	0.517489	0.377083	0.3994	0.494703	0.60061	0.437788	0.395331	0.386922	0.363905	0.394268	0.373564	0.427908	0.596467	0.363249	0.451761	0.391306	0.601181	0.364329	0.403241	0.436037	0.389193	0.46308	0.44503	0.485338	0.381211	0.365707	0.47629	0.362262	0.543734	0.470827	0.394406	0.433317	0.389625	0.396812	0.44378	0.382007
	8.863	0.362664	0.403805	0.441837	0.421737	0.412246	0.438284	0.375664	0.339133	0.347956	0.398769	0.672765	0.418312	0.524827	0.380278	0.407324	0.508475	0.601509	0.457382	0.396646	0.403299	0.363388	0.405186	0.387808	0.43575	0.584349	0.380017	0.450978	0.392459	0.573986	0.370122	0.397585	0.433054	0.374238	0.467971	0.450786	0.499945	0.400056	0.365963	0.479084	0.373189	0.546796	0.469698	0.399264	0.450351	0.383061	0.392927	0.448948	0.390348
	8.89637	0.366266	0.404317	0.436338	0.434889	0.408836	0.433614	0.376295	0.348177	0.346034	0.401049	0.666879	0.42021	0.524178	0.380011	0.389483	0.516484	0.587717	0.424928	0.396707	0.392555	0.375764	0.397305	0.391643	0.438199	0.601001	0.380963	0.45477	0.398264	0.603234	0.373314	0.402176	0.437475	0.371304	0.473852	0.456696	0.485428	0.40481	0.362169	0.487786	0.376579	0.55045	0.486059	0.392771	0.454317	0.404975	0.40351	0.44009	0.396625
	8.9297	0.365332	0.391689	0.439094	0.417407	0.410972	0.432931	0.372652	0.342022	0.338957	0.414531	0.671184	0.412442	0.51877	0.379449	0.401145	0.492489	0.592727	0.437907	0.398963	0.390904	0.357293	0.402422	0.381734	0.436762	0.588093	0.367857	0.448186	0.394742	0.584341	0.36304	0.394434	0.431251	0.388848	0.473753	0.46352	0.495254	0.398657	0.36688	0.48103	0.363317	0.521768	0.471552	0.395061	0.440602	0.391125	0.382272	0.447164	0.387677
	8.96302	0.367732	0.397735	0.43797	0.426867	0.400122	0.424769	0.36851	0.342067	0.341421	0.399963	0.653579	0.417957	0.506406	0.380664	0.395481	0.495783	0.591735	0.438195	0.401982	0.392001	0.377663	0.392125	0.38516	0.421866	0.580649	0.362976	0.448988	0.388322	0.588948	0.371176	0.404726	0.44393	0.372334	0.447092	0.448016	0.505919	0.409643	0.362413	0.470268	0.371517	0.528378	0.480445	0.391832	0.470452	0.402722	0.390138	0.443592	0.387322
	8.99637	0.361096	0.403361	0.449165	0.431005	0.417256	0.417338	0.372715	0.339659	0.338262	0.399464	0.648754	0.418082	0.520462	0.385778	0.403844	0.515027	0.592315	0.434659	0.394475	0.382305	0.364291	0.387356	0.377966	0.427466	0.568613	0.362309	0.454255	0.40011	0.597354	0.36498	0.397368	0.418747	0.385027	0.459916	0.451125	0.492276	0.399494	0.353278	0.474308	0.379459	0.529698	0.463266	0.393611	0.4528	0.397918	0.388112	0.460197	0.390943
	9.02968	0.36285	0.406397	0.451685	0.437756	0.415546	0.434708	0.377271	0.3484	0.349563	0.405521	0.666256	0.42799	0.528789	0.380961	0.403245	0.510763	0.58329	0.431308	0.390893	0.388217	0.375733	0.396688	0.396196	0.425027	0.58724	0.390537	0.453865	0.399873	0.588633	0.369837	0.40171	0.41231	0.375977	0.445911	0.449509	0.497805	0.395701	0.355374	0.473907	0.375259	0.541019	0.471727	0.416058	0.450018	0.406471	0.397627	0.447802	0.388195
	9.063	0.362781	0.40903	0.437904	0.418318	0.40386	0.43576	0.361356	0.343029	0.348056	0.404927	0.646295	0.413515	0.517126	0.378253	0.390586	0.497737	0.584527	0.434705	0.390457	0.381128	0.364307	0.394966	0.379512	0.43181	0.56614	0.379939	0.448368	0.3899	0.586776	0.381041	0.390618	0.412826	0.380052	0.482028	0.450267	0.491321	0.391989	0.361909	0.481539	0.373278	0.542099	0.470541	0.398958	0.452461	0.411954	0.398559	0.443939	0.374786
	9.09637	0.363104	0.399538	0.435791	0.428744	0.406455	0.430522	0.384062	0.343772	0.341641	0.399489	0.666038	0.414326	0.512063	0.385019	0.396871	0.501408	0.575816	0.442005	0.387751	0.381132	0.367229	0.396426	0.384188	0.440488	0.593615	0.374456	0.448902	0.396183	0.592323	0.3696	0.396471	0.423761	0.382491	0.461535	0.454401	0.494008	0.396009	0.366267	0.483424	0.367433	0.517945	0.469857	0.388157	0.412133	0.397996	0.393187	0.440256	0.37414
	9.12973	0.359755	0.397703	0.431596	0.411636	0.395743	0.437276	0.371499	0.340626	0.343559	0.409513	0.628058	0.424943	0.513373	0.388452	0.380894	0.469903	0.570477	0.429236	0.384992	0.38014	0.37463	0.391111	0.369071	0.419122	0.56948	0.367797	0.452178	0.396925	0.572545	0.37279	0.39573	0.412325	0.377609	0.469714	0.436787	0.499611	0.403382	0.355876	0.467466	0.370772	0.531538	0.463728	0.401128	0.456414	0.411342	0.388274	0.433904	0.384089
	9.16302	0.363539	0.383246	0.448076	0.421523	0.408462	0.42721	0.362593	0.339152	0.337395	0.402248	0.643483	0.419057	0.508126	0.373012	0.38149	0.5023	0.577096	0.424573	0.38977	0.382242	0.378972	0.397549	0.372186	0.430091	0.575112	0.376116	0.45524	0.3917	0.572782	0.374777	0.397637	0.417659	0.381701	0.465214	0.447017	0.491223	0.395483	0.372478	0.476949	0.368621	0.523763	0.459452	0.390485	0.448366	0.398139	0.399908	0.437963	0.385162
	9.1964	0.367123	0.399957	0.439924	0.418776	0.40431	0.428013	0.379155	0.344903	0.353405	0.398229	0.652841	0.416416	0.519254	0.383685	0.399631	0.503585	0.578258	0.437258	0.373868	0.384016	0.367619	0.396397	0.375537	0.428518	0.57823	0.360821	0.454533	0.401499	0.568337	0.367849	0.397539	0.420951	0.377927	0.460485	0.445374	0.488148	0.391487	0.359024	0.472229	0.373895	0.513012	0.458035	0.398521	0.428288	0.401005	0.389625	0.436553	0.36291
	9.2297	0.355245	0.39563	0.446687	0.413025	0.40307	0.42536	0.36896	0.338902	0.338602	0.396834	0.66008	0.412267	0.515967	0.37938	0.380292	0.491019	0.566759	0.416143	0.378061	0.380507	0.362873	0.392664	0.374828	0.418031	0.563542	0.372107	0.442872	0.399139	0.561172	0.367259	0.397239	0.419404	0.376489	0.453603	0.443907	0.474428	0.388368	0.364072	0.469204	0.374954	0.519092	0.46095	0.389497	0.427883	0.39458	0.393663	0.425489	0.381991
	9.26303	0.362233	0.386228	0.436889	0.419675	0.410138	0.428626	0.371177	0.34465	0.343942	0.395651	0.652065	0.410829	0.512901	0.37537	0.385972	0.486799	0.556757	0.425492	0.390466	0.381012	0.369203	0.38685	0.374911	0.418987	0.555577	0.373248	0.450135	0.390376	0.574079	0.363555	0.391285	0.418139	0.36999	0.471911	0.443383	0.465441	0.395007	0.364233	0.458317	0.358491	0.515895	0.467993	0.390137	0.428915	0.394337	0.381867	0.429503	0.38647
	9.29637	0.356781	0.388994	0.438572	0.419304	0.400525	0.426485	0.367004	0.337012	0.344519	0.411276	0.647326	0.417604	0.501483	0.377059	0.386922	0.486819	0.570811	0.425977	0.376484	0.367551	0.370716	0.398486	0.377717	0.42362	0.560956	0.374229	0.448505	0.389736	0.559676	0.365009	0.390421	0.424309	0.370425	0.450946	0.446586	0.486893	0.386151	0.363745	0.465445	0.369471	0.519262	0.450434	0.374897	0.435861	0.371014	0.376503	0.428881	0.404413
	9.3297	0.351135	0.38788	0.437897	0.409022	0.4224	0.422892	0.368875	0.34584	0.339833	0.40226	0.655538	0.417885	0.506746	0.384648	0.386247	0.489525	0.565482	0.427612	0.378839	0.375666	0.374496	0.397604	0.387678	0.430702	0.564153	0.365294	0.444844	0.403744	0.580403	0.372468	0.397988	0.409722	0.375418	0.476676	0.444476	0.492088	0.395364	0.359771	0.463132	0.380884	0.518052	0.469647	0.385776	0.43822	0.394971	0.387049	0.429409	0.373745
	9.36302	0.361692	0.382198	0.43938	0.419948	0.412841	0.419173	0.371656	0.344356	0.336689	0.396219	0.639494	0.409677	0.501818	0.379046	0.395898	0.480281	0.554396	0.437087	0.373331	0.383754	0.35393	0.388455	0.37788	0.415819	0.572799	0.362115	0.441499	0.392296	0.548007	0.364305	0.388958	0.417613	0.363358	0.458843	0.442098	0.496961	0.394245	0.360062	0.465299	0.361493	0.511893	0.457495	0.388392	0.445643	0.390678	0.367905	0.420037	0.383339
	9.39635	0.358403	0.395372	0.440659	0.426163	0.407318	0.427501	0.361047	0.351809	0.33379	0.39171	0.650012	0.413053	0.506951	0.386035	0.396544	0.488387	0.570423	0.424744	0.376072	0.378213	0.374324	0.384048	0.373043	0.429529	0.566019	0.374343	0.444711	0.400473	0.562704	0.364009	0.39789	0.428123	0.385359	0.455841	0.452541	0.479132	0.402583	0.370323	0.470357	0.376261	0.51209	0.460804	0.403236	0.450538	0.401822	0.383947	0.435779	0.37443
	9.42967	0.359538	0.388882	0.437664	0.408276	0.41949	0.425214	0.362274	0.350053	0.336722	0.388306	0.637034	0.412114	0.500112	0.379227	0.384603	0.486413	0.56728	0.426108	0.384877	0.375443	0.360323	0.397396	0.371015	0.4157	0.567616	0.367473	0.44745	0.397658	0.559374	0.358644	0.387267	0.42532	0.377893	0.449993	0.451527	0.480786	0.399247	0.357043	0.465854	0.361902	0.514	0.454232	0.379807	0.429632	0.390697	0.382786	0.435061	0.370664
	9.463	0.364237	0.395638	0.44685	0.416618	0.409583	0.422027	0.372517	0.35338	0.340736	0.397147	0.631295	0.428254	0.510384	0.390103	0.389067	0.487962	0.558255	0.432875	0.388085	0.376781	0.363619	0.392308	0.376697	0.422885	0.566984	0.380017	0.45242	0.407657	0.576043	0.373363	0.394659	0.432407	0.37776	0.455618	0.436332	0.483998	0.399034	0.362811	0.466994	0.374128	0.506021	0.462466	0.400877	0.423497	0.406557	0.388947	0.437477	0.389048
	9.49633	0.357757	0.383827	0.43977	0.412312	0.410443	0.424609	0.366776	0.346813	0.345956	0.389484	0.625733	0.418352	0.502088	0.378459	0.383673	0.477766	0.552352	0.417969	0.373871	0.36952	0.359063	0.394397	0.372	0.413582	0.562376	0.36854	0.438329	0.404067	0.562064	0.369767	0.400565	0.430797	0.372805	0.453588	0.448163	0.479979	0.387951	0.365064	0.471891	0.37694	0.506482	0.469092	0.402119	0.433524	0.417028	0.37621	0.419616	0.382155
	9.52968	0.354063	0.384849	0.440529	0.41228	0.410064	0.426404	0.364643	0.334633	0.335216	0.402724	0.636221	0.409532	0.491998	0.377047	0.385868	0.496435	0.546839	0.420226	0.367601	0.373983	0.352476	0.392062	0.377372	0.418995	0.560813	0.368951	0.441923	0.397801	0.545056	0.369014	0.397107	0.41176	0.370688	0.446036	0.446198	0.463485	0.394028	0.36314	0.479533	0.374017	0.505752	0.469726	0.391468	0.436615	0.367782	0.382908	0.428076	0.352502
	9.56305	0.355948	0.385173	0.443116	0.414012	0.405799	0.426593	0.368412	0.341398	0.340176	0.395014	0.639361	0.413927	0.503379	0.378213	0.382438	0.479394	0.553704	0.418825	0.377775	0.371815	0.359398	0.403234	0.3748	0.412806	0.552575	0.365864	0.437162	0.398164	0.548957	0.361285	0.382916	0.420356	0.375368	0.466769	0.437374	0.464289	0.395197	0.360603	0.453723	0.382513	0.502584	0.458618	0.391969	0.416657	0.398096	0.382208	0.428242	0.374502
	9.59637	0.364959	0.393183	0.442446	0.408105	0.420539	0.418715	0.375774	0.345308	0.330818	0.392456	0.632982	0.409222	0.504341	0.382881	0.377541	0.472389	0.541736	0.411249	0.37387	0.370895	0.356747	0.399376	0.374659	0.409496	0.543356	0.364015	0.441446	0.394697	0.556089	0.364127	0.386157	0.419319	0.363675	0.45757	0.439436	0.477914	0.379129	0.360564	0.456887	0.376202	0.515338	0.45873	0.400488	0.442101	0.37753	0.377745	0.415938	0.385558
	9.6297	0.365895	0.385272	0.437587	0.410278	0.411752	0.42154	0.359911	0.345651	0.341095	0.378182	0.622712	0.415033	0.492505	0.37672	0.389763	0.480519	0.544511	0.424437	0.386329	0.371538	0.358168	0.396064	0.367078	0.419042	0.554362	0.369391	0.434527	0.397247	0.558919	0.366131	0.387705	0.421295	0.367083	0.4627	0.438057	0.455642	0.404764	0.373842	0.452706	0.378872	0.508043	0.467506	0.387538	0.43801	0.396824	0.375149	0.432893	0.379132
	9.66302	0.363572	0.372455	0.436539	0.416694	0.403239	0.422885	0.358902	0.340103	0.331318	0.401133	0.613612	0.409573	0.490181	0.382832	0.371651	0.470676	0.53715	0.414948	0.373092	0.363447	0.353556	0.389132	0.363049	0.399083	0.54953	0.358693	0.434722	0.405122	0.535064	0.360904	0.389385	0.416118	0.35662	0.440053	0.449711	0.467146	0.390004	0.359067	0.461361	0.366051	0.490797	0.459398	0.393088	0.432989	0.384562	0.38634	0.420873	0.360257
	9.69633	0.357998	0.391417	0.437693	0.410198	0.426252	0.419004	0.375036	0.338064	0.341809	0.388485	0.630952	0.41254	0.495546	0.375343	0.372857	0.479843	0.54163	0.426404	0.371846	0.370798	0.364684	0.391138	0.376782	0.4227	0.548827	0.353327	0.44091	0.399629	0.547022	0.361691	0.388401	0.415057	0.376543	0.449676	0.455222	0.468687	0.383571	0.362095	0.454139	0.372903	0.492289	0.451808	0.390624	0.442533	0.386545	0.369243	0.413279	0.385305
	9.72968	0.362042	0.388293	0.439165	0.408156	0.403069	0.419597	0.368569	0.351115	0.338014	0.394138	0.642987	0.414536	0.493422	0.378247	0.388944	0.465831	0.537094	0.413984	0.375373	0.375687	0.362763	0.393882	0.371195	0.411607	0.543355	0.356543	0.429998	0.398119	0.545163	0.371893	0.398696	0.415575	0.371086	0.461539	0.450587	0.466719	0.398792	0.356264	0.466125	0.376715	0.489172	0.460666	0.39016	0.456401	0.396633	0.377863	0.415616	0.372904
	9.763	0.357111	0.388388	0.43839	0.405246	0.411887	0.41207	0.361499	0.347199	0.34267	0.393908	0.630523	0.404658	0.498382	0.374967	0.372324	0.474504	0.540326	0.418182	0.36548	0.371225	0.355561	0.387233	0.36476	0.414216	0.537981	0.358799	0.438133	0.401116	0.554359	0.366972	0.394386	0.408794	0.373448	0.454891	0.442331	0.466048	0.389578	0.356711	0.449615	0.361891	0.489178	0.466578	0.371764	0.435426	0.401763	0.381226	0.407086	0.356707
	9.79638	0.370724	0.388008	0.424654	0.403584	0.402323	0.431205	0.363239	0.331107	0.33178	0.384338	0.601607	0.406234	0.486727	0.379668	0.367687	0.476523	0.543945	0.405135	0.359861	0.357306	0.343099	0.383697	0.360886	0.408082	0.540718	0.355957	0.42514	0.39251	0.53731	0.360116	0.374769	0.420198	0.362568	0.442376	0.430194	0.46397	0.384923	0.360674	0.456308	0.365252	0.478451	0.4533	0.394581	0.420682	0.382073	0.373888	0.40269	0.371631
	9.82973	0.361354	0.377992	0.432151	0.402314	0.40258	0.418986	0.366284	0.338595	0.336098	0.395637	0.62452	0.409315	0.490116	0.383577	0.382877	0.487733	0.532551	0.429575	0.366049	0.370793	0.344097	0.383907	0.371996	0.420316	0.544844	0.370834	0.439694	0.394375	0.554918	0.363421	0.389718	0.410859	0.377028	0.446111	0.447747	0.461715	0.3986	0.37056	0.453874	0.366723	0.502373	0.453549	0.380862	0.432649	0.396854	0.36458	0.408139	0.371201
	9.863	0.360398	0.38999	0.42662	0.407689	0.401799	0.417929	0.359297	0.342749	0.336113	0.393859	0.617193	0.416141	0.490789	0.379137	0.378932	0.474384	0.541578	0.417485	0.375149	0.371213	0.369238	0.386459	0.36815	0.409903	0.543888	0.351394	0.43137	0.39963	0.546962	0.363955	0.387334	0.417457	0.366923	0.45442	0.44458	0.464543	0.374345	0.352558	0.452142	0.371497	0.487682	0.462375	0.378624	0.431297	0.401572	0.381532	0.420507	0.361419
	9.89635	0.357154	0.386262	0.427516	0.402759	0.406149	0.424252	0.370558	0.337516	0.3391	0.388332	0.628965	0.409006	0.492777	0.374212	0.378989	0.467924	0.54565	0.422077	0.371983	0.372951	0.356756	0.387731	0.360243	0.415336	0.545949	0.360376	0.443586	0.398357	0.546527	0.365857	0.391873	0.433684	0.357927	0.439854	0.441332	0.469944	0.395097	0.368741	0.45504	0.371842	0.490626	0.452391	0.390588	0.410146	0.396141	0.369532	0.40272	0.353674
	9.92968	0.366164	0.389201	0.424589	0.408001	0.411643	0.420119	0.350466	0.343441	0.335688	0.38561	0.638693	0.405754	0.489871	0.382348	0.383637	0.484532	0.536949	0.422899	0.37094	0.376362	0.354665	0.3998	0.374108	0.4	0.530355	0.348157	0.432153	0.404721	0.547119	0.364624	0.397812	0.4168	0.371319	0.461008	0.440195	0.47023	0.391669	0.359428	0.44889	0.369749	0.486669	0.458346	0.387664	0.442988	0.379095	0.38173	0.404274	0.361998
	9.96303	0.364522	0.388251	0.422029	0.417953	0.414157	0.406663	0.35725	0.337784	0.3393	0.389528	0.605678	0.410638	0.502801	0.377247	0.392129	0.464438	0.518716	0.412786	0.367785	0.372276	0.353597	0.384418	0.376142	0.401627	0.529069	0.362414	0.419058	0.392563	0.527564	0.359678	0.387336	0.399731	0.358977	0.436633	0.433	0.462804	0.384845	0.358403	0.465201	0.370976	0.484167	0.440473	0.383726	0.440642	0.395905	0.37727	0.400287	0.365806
	9.99635	0.407682	0.417668	0.510174	0.472098	0.490985	0.455959	0.394406	0.383068	0.36578	0.420479	0.666704	0.482817	0.556259	0.420035	0.423036	0.553725	0.553736	0.459107	0.392225	0.420303	0.412241	0.431198	0.387814	0.445367	0.623937	0.389548	0.476051	0.437979	0.598193	0.405563	0.465585	0.445354	0.389337	0.468555	0.545733	0.507207	0.446727	0.422994	0.53258	0.450836	0.553562	0.503441	0.45811	0.576414	0.438648	0.409885	0.450894	0.425516
	10.0297	0.463417	0.490534	0.576738	0.533828	0.575061	0.516878	0.431944	0.462221	0.402568	0.486892	0.716551	0.55051	0.617816	0.472205	0.513868	0.65529	0.65512	0.494821	0.437341	0.477327	0.476359	0.517942	0.432749	0.507331	0.707428	0.4311	0.525913	0.494132	0.658557	0.456515	0.55446	0.500829	0.443418	0.504748	0.652863	0.543884	0.465575	0.491979	0.606945	0.543558	0.594371	0.551336	0.54205	0.673584	0.499284	0.441239	0.491225	0.522042
	10.063	0.517826	0.52876	0.661017	0.577182	0.650429	0.588976	0.480191	0.515085	0.449595	0.528864	0.782566	0.628245	0.679651	0.51637	0.580773	0.805057	0.696303	0.531908	0.471867	0.556222	0.527625	0.572228	0.465686	0.577962	0.783402	0.462445	0.609574	0.522238	0.739816	0.497434	0.660296	0.533007	0.497368	0.50072	0.72697	0.591572	0.520466	0.57055	0.672321	0.691527	0.646357	0.614744	0.671287	0.747212	0.540838	0.477194	0.549975	0.647356
	10.0963	0.572681	0.569746	0.764289	0.655932	0.763772	0.664416	0.517978	0.583503	0.494231	0.567126	0.828241	0.695414	0.750616	0.569319	0.699742	0.934688	0.802006	0.582651	0.501906	0.614253	0.567156	0.684688	0.51759	0.649398	0.843427	0.497543	0.673432	0.574618	0.81073	0.552935	0.767167	0.610187	0.55802	0.550662	0.839425	0.645211	0.582791	0.702857	0.777241	0.796047	0.69993	0.678226	0.799327	0.745483	0.583712	0.498149	0.595107	0.748754
	10.1297	0.625164	0.65647	0.873327	0.723681	0.836121	0.783766	0.575584	0.689814	0.534646	0.640124	0.890969	0.763049	0.817625	0.647033	0.796596	1.03246	0.868362	0.651401	0.53227	0.739383	0.702953	0.797482	0.556194	0.770295	0.884096	0.518841	0.77098	0.693573	0.900267	0.64314	0.836324	0.650311	0.621721	0.568997	0.907708	0.711752	0.604238	0.819238	0.854407	0.9069	0.73653	0.756066	0.936161	0.86394	0.641409	0.535273	0.653913	0.827389
	10.1631	0.717169	0.72102	0.929232	0.816595	0.939834	0.877397	0.63008	0.770662	0.623996	0.707248	0.928507	0.883906	0.880908	0.742951	0.914037	1.11365	0.925632	0.679962	0.550424	0.850896	0.754791	0.877885	0.581486	0.866005	0.968359	0.555264	0.873512	0.798555	0.97884	0.733882	0.917948	0.644833	0.701413	0.610759	0.965813	0.772655	0.642134	0.897443	0.931494	0.954634	0.827273	0.829538	0.986853	0.914999	0.713048	0.588451	0.722181	0.951181
	10.1963	0.828151	0.760058	1.01266	0.878531	1.01731	0.948266	0.710251	0.835968	0.729771	0.758873	0.984053	0.984085	0.960268	0.808697	0.950538	1.1369	0.999058	0.741535	0.558772	0.939498	0.834717	0.94802	0.646649	0.931976	1.00228	0.592753	0.926249	0.915756	1.05512	0.802567	0.960291	0.736436	0.764844	0.629901	0.98257	0.835683	0.72006	0.95476	1.00635	1.01912	0.886046	0.88472	1.03215	0.924826	0.759218	0.618851	0.775814	0.999518
	10.2297	0.913865	0.834052	1.07397	0.947577	1.04878	1.00217	0.799852	0.889474	0.789099	0.802357	1.01375	1.05377	0.98255	0.882311	1.01781	1.21078	1.09067	0.817665	0.59149	0.994633	0.861445	0.994527	0.747689	1.0066	1.06758	0.626095	1.01406	0.954824	1.06315	0.870964	0.989255	0.799743	0.829717	0.64725	1.06192	0.876707	0.752634	1.04508	1.04444	1.05906	0.969749	0.94068	1.10883	0.930222	0.821415	0.682924	0.815465	1.00362
	10.263	0.994648	0.875579	1.13951	0.998358	1.09935	1.05497	0.866121	0.931107	0.870605	0.877881	1.05336	1.1187	1.01816	0.94496	1.13569	1.31296	1.11971	0.857706	0.638466	1.0565	0.948505	1.06213	0.800938	1.05674	1.07927	0.664015	1.07246	1.04194	1.14504	0.943738	1.07251	0.8553	0.891401	0.654651	1.08572	0.902006	0.822346	1.07511	1.09644	1.10357	1.03203	0.995097	1.20383	1.02866	0.904516	0.741604	0.877593	1.09392
	10.2964	1.02539	0.927342	1.12923	1.00639	1.10567	1.07412	0.891281	0.959386	0.922262	0.884604	1.08874	1.14681	1.07378	0.973912	1.12153	1.35301	1.10671	0.899272	0.66368	1.0992	0.991601	1.10555	0.81682	1.09869	1.12993	0.6879	1.09322	1.06678	1.16361	0.982368	1.07934	0.899659	0.93506	0.729477	1.09565	0.946209	0.887191	1.1243	1.15954	1.11853	1.09705	1.04174	1.23116	1.0459	0.910327	0.845281	0.923728	1.1363
	10.3297	1.07421	0.966338	1.20164	1.07504	1.15349	1.14202	0.978724	0.999525	0.964248	0.978149	1.11894	1.24504	1.11946	1.02502	1.16778	1.37472	1.20473	0.939089	0.676673	1.13208	1.02474	1.15386	0.882668	1.16967	1.18892	0.733815	1.14096	1.13424	1.1766	1.03339	1.11319	0.894928	0.954859	0.732501	1.1399	0.992246	0.983119	1.17238	1.21069	1.14528	1.13424	1.05597	1.31225	1.05811	0.973466	0.856923	0.981853	1.14015
	10.363	1.09778	0.984992	1.22521	1.11922	1.20554	1.1506	1.01196	1.02859	0.994411	0.987435	1.13972	1.32018	1.14324	1.04664	1.1703	1.40935	1.18004	0.972822	0.723722	1.20571	1.04639	1.14875	0.932261	1.19769	1.16918	0.752017	1.17712	1.14213	1.22834	1.06352	1.12827	0.972418	0.991619	0.807919	1.15143	1.00835	1.03459	1.22927	1.23687	1.17803	1.17626	1.09664	1.31207	1.06812	1.02942	0.889844	1.03392	1.20403
	10.3964	1.10186	1.03805	1.20541	1.12873	1.21875	1.19009	1.03749	1.063	1.02623	1.01436	1.15152	1.33914	1.18034	1.06155	1.18316	1.4562	1.24698	0.993989	0.714283	1.21518	1.03738	1.18562	0.961743	1.21402	1.19666	0.794008	1.20424	1.16571	1.24361	1.09543	1.10429	0.925006	0.998958	0.829775	1.17228	1.01769	1.02914	1.23483	1.27387	1.17321	1.18259	1.13206	1.3336	1.04495	1.01396	0.953373	1.08258	1.20724
	10.4297	1.1791	1.0495	1.25797	1.1708	1.23252	1.23062	1.07565	1.07954	1.07605	1.01696	1.198	1.44206	1.21671	1.10709	1.23924	1.48693	1.21198	1.01181	0.759447	1.23542	1.1382	1.18902	0.953485	1.26657	1.24584	0.830783	1.23618	1.21313	1.26597	1.14521	1.19186	1.01957	1.06258	0.873707	1.21059	1.0834	1.07559	1.24795	1.31098	1.24606	1.22018	1.16629	1.36263	1.08888	1.0684	0.97009	1.15214	1.26322
	10.463	1.21645	1.08443	1.26679	1.18876	1.23374	1.21806	1.12061	1.08817	1.07475	1.05126	1.1988	1.47603	1.22011	1.12289	1.29586	1.47452	1.27939	1.02801	0.772793	1.22658	1.1609	1.21851	0.951247	1.28108	1.23959	0.819524	1.26666	1.22029	1.31571	1.1745	1.18792	0.985411	1.06333	0.921193	1.19901	1.07549	1.10536	1.23344	1.35375	1.21022	1.23725	1.19106	1.37706	1.17406	1.08768	0.991822	1.17687	1.26535
	10.4964	1.19881	1.08535	1.27609	1.19591	1.28886	1.24553	1.15004	1.10021	1.12061	1.10264	1.1822	1.49011	1.21825	1.12989	1.27468	1.5604	1.26825	1.04937	0.8111	1.20811	1.15309	1.20558	0.978238	1.29618	1.29624	0.856152	1.31922	1.24849	1.3163	1.19787	1.21976	1.03137	1.06244	0.952319	1.21487	1.11139	1.12808	1.33709	1.34498	1.25388	1.27159	1.18683	1.38513	1.15142	1.10064	1.0304	1.19589	1.22956
	10.5297	1.2624	1.12878	1.3134	1.23203	1.30724	1.25722	1.14198	1.13687	1.11439	1.09295	1.22183	1.5217	1.2836	1.15059	1.28921	1.53902	1.29701	1.06617	0.805562	1.25315	1.14018	1.24195	1.04345	1.33741	1.36158	0.879853	1.30772	1.25989	1.33218	1.21262	1.19217	1.04804	1.11029	0.967827	1.26906	1.13866	1.15024	1.29102	1.38954	1.28865	1.27714	1.21292	1.53103	1.186	1.14136	1.08279	1.24669	1.3226
	10.563	1.24874	1.10631	1.29311	1.23475	1.30393	1.27444	1.18136	1.13502	1.15435	1.08768	1.23219	1.51865	1.30188	1.13638	1.30947	1.49305	1.30997	1.07016	0.822764	1.28608	1.15234	1.26769	1.07013	1.31103	1.32004	0.906779	1.34545	1.2793	1.34019	1.20772	1.22168	1.05938	1.13322	1.02366	1.25089	1.10618	1.1866	1.2984	1.38801	1.24383	1.32943	1.22639	1.38744	1.16236	1.20292	1.09664	1.24514	1.20256
	10.5963	1.30721	1.12386	1.33157	1.2783	1.32413	1.31044	1.20038	1.17455	1.17807	1.12532	1.22586	1.55383	1.31699	1.16837	1.34763	1.59742	1.33667	1.09698	0.84524	1.30477	1.19983	1.29738	1.07674	1.35083	1.36693	0.985766	1.33095	1.26843	1.3572	1.23743	1.2467	1.07238	1.09221	1.04166	1.26576	1.17624	1.16181	1.38717	1.40407	1.28099	1.30865	1.24054	1.45857	1.18319	1.17861	1.14199	1.30676	1.32787
	10.6297	1.28138	1.11463	1.31004	1.28694	1.35411	1.29102	1.19388	1.19192	1.17082	1.13041	1.26511	1.55263	1.31684	1.1713	1.33676	1.58859	1.33634	1.11835	0.841895	1.26563	1.20342	1.25901	1.09953	1.32395	1.38623	0.999038	1.33767	1.25213	1.36037	1.26603	1.24489	1.11634	1.12487	1.01267	1.25061	1.1281	1.15111	1.36848	1.44067	1.23576	1.38139	1.25322	1.44234	1.22053	1.24341	1.15966	1.36694	1.34892
	10.663	1.28305	1.1592	1.32175	1.27918	1.34834	1.3094	1.21028	1.22028	1.18731	1.1643	1.25956	1.53698	1.35096	1.17715	1.35013	1.57176	1.38699	1.1165	0.849854	1.25901	1.19321	1.25517	1.14412	1.37821	1.37451	1.07678	1.37206	1.30165	1.38257	1.26055	1.23982	1.10647	1.14717	1.07778	1.26835	1.19271	1.21324	1.36876	1.47452	1.29208	1.424	1.20735	1.46089	1.1863	1.23135	1.13688	1.39857	1.36292
	10.6964	1.261	1.15782	1.33426	1.26988	1.34336	1.34323	1.23814	1.24067	1.23565	1.17302	1.26792	1.5653	1.35822	1.17286	1.30631	1.58009	1.32772	1.10946	0.874575	1.2691	1.2188	1.31332	1.15893	1.38129	1.44279	1.03838	1.37773	1.2805	1.33888	1.2329	1.27591	1.11053	1.16675	1.1141	1.25762	1.20253	1.22945	1.38928	1.49241	1.25852	1.43859	1.2634	1.45399	1.16118	1.28218	1.16689	1.43565	1.25913
	10.7297	1.27956	1.16133	1.34214	1.27413	1.33401	1.31197	1.2382	1.26396	1.229	1.19146	1.28174	1.56213	1.33332	1.21104	1.35861	1.61977	1.32938	1.08009	0.8651	1.30838	1.23629	1.28468	1.17887	1.35307	1.39787	1.0446	1.40197	1.27416	1.4072	1.26844	1.25994	1.12137	1.14398	1.088	1.27595	1.20748	1.21497	1.37189	1.4951	1.2958	1.45343	1.23197	1.45034	1.21107	1.19928	1.14946	1.46076	1.29671
	10.763	1.29587	1.18511	1.31616	1.33332	1.32778	1.35456	1.24795	1.26905	1.25056	1.18329	1.33428	1.57375	1.37321	1.21243	1.37367	1.54869	1.31746	1.14272	0.869484	1.291	1.18426	1.26137	1.12932	1.3612	1.38355	1.07883	1.35363	1.32204	1.37472	1.27018	1.24827	1.11299	1.14232	1.11393	1.28312	1.18258	1.23358	1.38042	1.49892	1.25559	1.43524	1.26069	1.51593	1.2543	1.20931	1.17542	1.46661	1.34645
	10.7963	1.30643	1.19743	1.32639	1.28644	1.34445	1.37415	1.25757	1.28849	1.248	1.23603	1.35496	1.60224	1.36977	1.19239	1.38597	1.55384	1.36868	1.15034	0.878683	1.25635	1.27062	1.27954	1.17694	1.41727	1.43772	1.06064	1.36675	1.30317	1.40994	1.28418	1.27058	1.1927	1.17397	1.15597	1.28912	1.25545	1.21686	1.38838	1.53069	1.30422	1.47394	1.28151	1.47046	1.19145	1.28208	1.1601	1.43239	1.31724
	10.8297	1.31271	1.15426	1.32232	1.28915	1.32334	1.35223	1.26113	1.31079	1.2485	1.21429	1.32509	1.60524	1.41088	1.23426	1.37207	1.56274	1.39501	1.13155	0.882835	1.26718	1.25719	1.28076	1.12995	1.38755	1.41725	1.05069	1.38637	1.29377	1.42864	1.27059	1.24357	1.1595	1.15909	1.14735	1.29308	1.2143	1.26252	1.38609	1.50689	1.26466	1.4837	1.3201	1.48154	1.19846	1.23823	1.19999	1.48066	1.30829
	10.863	1.32352	1.20377	1.33934	1.34976	1.34219	1.38102	1.24597	1.31223	1.26922	1.22895	1.35576	1.59557	1.42178	1.21807	1.41614	1.60016	1.38368	1.17521	0.874925	1.27242	1.35268	1.27608	1.19114	1.41054	1.40935	1.11775	1.40414	1.30487	1.41118	1.27816	1.26392	1.18384	1.16279	1.15283	1.31751	1.2472	1.23895	1.40144	1.50399	1.27947	1.55916	1.28818	1.49888	1.27415	1.28761	1.23722	1.48006	1.34642
	10.8963	1.33387	1.19244	1.33195	1.36725	1.36155	1.3373	1.31368	1.32058	1.2575	1.24752	1.37098	1.58622	1.3867	1.20701	1.34482	1.55164	1.37254	1.13613	0.90181	1.27625	1.25118	1.25376	1.16054	1.39123	1.41375	1.07476	1.38917	1.30181	1.37864	1.29708	1.27728	1.1734	1.16324	1.1619	1.31179	1.2591	1.27487	1.38267	1.51393	1.2752	1.5356	1.2915	1.44613	1.21675	1.28177	1.20124	1.50816	1.29843
	10.9296	1.33462	1.19621	1.36611	1.31913	1.42916	1.3747	1.30444	1.33353	1.27997	1.23996	1.34859	1.60203	1.41365	1.20651	1.40082	1.52951	1.39788	1.15447	0.90719	1.3123	1.28616	1.29331	1.17418	1.3933	1.42117	1.07566	1.38215	1.29071	1.39773	1.28895	1.28432	1.17885	1.15638	1.19135	1.2987	1.24975	1.25471	1.38407	1.53624	1.27675	1.58223	1.31735	1.52931	1.31257	1.23338	1.26723	1.46058	1.34826
	10.963	1.32298	1.21272	1.39555	1.35553	1.41599	1.35857	1.2935	1.30661	1.26653	1.26441	1.38975	1.61437	1.40376	1.23515	1.4019	1.55147	1.38109	1.16317	0.907487	1.26314	1.2473	1.30357	1.21171	1.4022	1.43284	1.10341	1.4155	1.29753	1.42971	1.29832	1.25386	1.19524	1.14804	1.2565	1.31969	1.24172	1.29314	1.41523	1.5452	1.24663	1.60044	1.32903	1.47998	1.2749	1.28129	1.20793	1.51909	1.31126
	10.9963	1.34603	1.22733	1.34855	1.36302	1.39054	1.37839	1.27449	1.33141	1.26751	1.30092	1.36106	1.64383	1.43188	1.24117	1.36772	1.52993	1.39529	1.16099	0.902639	1.31062	1.30987	1.28898	1.16367	1.41921	1.45007	1.09148	1.41935	1.30842	1.4224	1.3192	1.2871	1.23635	1.17465	1.18779	1.28968	1.24362	1.29396	1.3477	1.53226	1.24005	1.57882	1.29425	1.49406	1.2484	1.33405	1.22936	1.52155	1.35503
	11.0297	1.3193	1.22658	1.34757	1.34272	1.365	1.36526	1.32807	1.31046	1.23802	1.24398	1.36318	1.59096	1.40975	1.19028	1.3677	1.55539	1.38765	1.19029	0.884059	1.27293	1.21294	1.25588	1.15774	1.42888	1.45304	1.05481	1.38281	1.27164	1.41037	1.29807	1.22157	1.24849	1.15115	1.16419	1.29508	1.24666	1.28958	1.33522	1.50659	1.26855	1.61353	1.30415	1.47032	1.29324	1.30082	1.22812	1.52498	1.33912
	11.063	1.37246	1.26146	1.36576	1.34963	1.36318	1.37601	1.3319	1.29944	1.23742	1.26595	1.38328	1.58781	1.44791	1.22185	1.43011	1.56673	1.37218	1.20624	0.89447	1.32513	1.2205	1.25467	1.1865	1.43098	1.50133	1.12706	1.40239	1.2806	1.42963	1.31371	1.27771	1.21473	1.15584	1.23313	1.29999	1.26377	1.32455	1.35379	1.54933	1.25721	1.64095	1.35001	1.51096	1.29021	1.31365	1.26453	1.54066	1.36503
	11.0964	1.34167	1.26868	1.32973	1.38072	1.41889	1.36231	1.29725	1.27939	1.24911	1.29723	1.35937	1.6173	1.43345	1.17819	1.40484	1.48457	1.41851	1.19996	0.905513	1.27298	1.27199	1.29316	1.18772	1.40352	1.49079	1.12256	1.40474	1.24965	1.46277	1.31479	1.29401	1.22579	1.16693	1.2042	1.2901	1.23711	1.31669	1.40216	1.52812	1.22921	1.66653	1.34219	1.48551	1.25676	1.24821	1.24142	1.49549	1.32974
	11.1297	1.3426	1.22196	1.35641	1.33806	1.37729	1.37413	1.3464	1.28668	1.26726	1.27184	1.35763	1.56194	1.45952	1.20063	1.3458	1.56058	1.38333	1.18982	0.907662	1.27659	1.2939	1.26882	1.17144	1.43981	1.46792	1.09934	1.42021	1.27667	1.48465	1.29851	1.26352	1.21432	1.15806	1.24172	1.33288	1.24598	1.30872	1.32873	1.55496	1.25132	1.68391	1.33804	1.47049	1.24594	1.31006	1.30777	1.50689	1.36692
	11.163	1.33085	1.19104	1.29625	1.38719	1.33151	1.35502	1.33035	1.2543	1.21896	1.28686	1.38004	1.58451	1.43234	1.19893	1.3496	1.54301	1.38474	1.18454	0.899727	1.28036	1.22987	1.28183	1.16614	1.46529	1.44927	1.10588	1.40196	1.27476	1.43464	1.26494	1.27115	1.23167	1.17619	1.18913	1.32394	1.26509	1.26932	1.31885	1.55168	1.22691	1.68259	1.34126	1.45955	1.25124	1.3052	1.2618	1.5183	1.28228
	11.1964	1.32102	1.22964	1.33953	1.38889	1.40824	1.38055	1.31607	1.24401	1.31317	1.29731	1.38165	1.59003	1.46799	1.16216	1.36374	1.49039	1.37539	1.18345	0.940123	1.24781	1.30863	1.26516	1.21556	1.42463	1.47375	1.12111	1.38309	1.28655	1.44303	1.29017	1.25505	1.27328	1.14684	1.24516	1.31085	1.26801	1.31805	1.34558	1.55664	1.2474	1.71246	1.35925	1.53252	1.20498	1.22943	1.24202	1.49358	1.21333
	11.2297	1.36827	1.24063	1.34724	1.39666	1.4087	1.36729	1.29644	1.26345	1.2641	1.30596	1.37041	1.54198	1.46669	1.18533	1.34755	1.51222	1.40209	1.17483	0.949736	1.29548	1.20915	1.24498	1.15156	1.407	1.50713	1.08719	1.39643	1.27744	1.48823	1.26011	1.27561	1.25225	1.197	1.25884	1.29454	1.2168	1.3255	1.33703	1.5576	1.20525	1.73415	1.35422	1.4765	1.30969	1.29543	1.29946	1.47816	1.26806
	11.263	1.34685	1.25364	1.36307	1.41449	1.38748	1.35541	1.33063	1.27082	1.24109	1.28905	1.39456	1.55614	1.43586	1.19784	1.34823	1.57052	1.41115	1.24155	0.960373	1.30596	1.25692	1.25375	1.19823	1.461	1.53158	1.09147	1.41061	1.27718	1.4779	1.28863	1.27753	1.29042	1.15576	1.27337	1.29684	1.25326	1.32717	1.37444	1.57102	1.21314	1.69863	1.35593	1.4278	1.27557	1.31386	1.24833	1.4771	1.32753
	11.2964	1.37982	1.26992	1.34817	1.39821	1.36547	1.38796	1.31715	1.28935	1.2902	1.32044	1.39119	1.55221	1.47063	1.29293	1.36843	1.55222	1.41905	1.20217	0.975655	1.28466	1.26129	1.25908	1.18373	1.42052	1.51466	1.12306	1.36967	1.30092	1.4951	1.26468	1.27436	1.25992	1.1827	1.28688	1.32132	1.26071	1.30605	1.35625	1.62365	1.26272	1.77966	1.35134	1.47557	1.22007	1.31167	1.27211	1.48895	1.29052
	11.3297	1.35325	1.28019	1.33202	1.38521	1.36946	1.36103	1.31482	1.27643	1.28095	1.28209	1.39192	1.54446	1.45329	1.24951	1.35215	1.4699	1.38641	1.20903	0.929937	1.26023	1.23589	1.22263	1.17258	1.41923	1.54891	1.12234	1.38887	1.2942	1.49348	1.24711	1.2975	1.21598	1.1556	1.25566	1.30955	1.26092	1.34448	1.30757	1.52158	1.18876	1.73404	1.37206	1.44713	1.23688	1.33269	1.25304	1.46824	1.30214
	11.363	1.37435	1.28907	1.32019	1.3661	1.38961	1.39399	1.33863	1.24693	1.25801	1.30322	1.41178	1.52648	1.46404	1.27424	1.36041	1.4748	1.43376	1.15236	0.975218	1.28058	1.24466	1.23933	1.18166	1.41845	1.51698	1.12183	1.37746	1.29062	1.46362	1.27523	1.24886	1.2593	1.12811	1.28401	1.31178	1.23435	1.33902	1.34212	1.54927	1.1882	1.77023	1.38332	1.4981	1.24916	1.26281	1.28766	1.4902	1.31181
	11.3964	1.37912	1.26428	1.34729	1.37036	1.3822	1.36841	1.34409	1.27335	1.27158	1.2912	1.4293	1.51161	1.44357	1.28923	1.38264	1.48938	1.39923	1.17621	0.948804	1.30131	1.29529	1.24609	1.18898	1.42198	1.5415	1.13502	1.3828	1.29093	1.47469	1.30353	1.27501	1.26332	1.15808	1.30311	1.3359	1.26841	1.32066	1.33931	1.54897	1.18459	1.74652	1.30999	1.47139	1.25541	1.28215	1.25819	1.42404	1.33573
	11.4297	1.38468	1.25486	1.31501	1.36764	1.38398	1.35441	1.34476	1.25507	1.23051	1.28206	1.41256	1.51645	1.46006	1.29122	1.3487	1.50705	1.44545	1.21162	0.937113	1.27955	1.25881	1.24958	1.18871	1.43617	1.49508	1.12951	1.40241	1.26196	1.4606	1.2742	1.24325	1.28415	1.1703	1.26663	1.32593	1.24796	1.29625	1.28341	1.55061	1.20283	1.76659	1.3425	1.41325	1.27697	1.2772	1.26858	1.45014	1.28268
	11.463	1.35885	1.31199	1.38084	1.39236	1.4164	1.36265	1.33794	1.26108	1.21359	1.33378	1.4271	1.50402	1.46222	1.28174	1.34729	1.49549	1.48697	1.23584	0.966057	1.28573	1.28194	1.24967	1.20643	1.40399	1.53651	1.12237	1.39418	1.26102	1.47835	1.29863	1.24932	1.27451	1.16297	1.34451	1.33021	1.2546	1.31465	1.34244	1.57345	1.19648	1.77496	1.35991	1.44696	1.22662	1.29017	1.28968	1.4392	1.30806
	11.4963	1.35496	1.27489	1.33113	1.39248	1.37702	1.36319	1.32938	1.22816	1.2598	1.33638	1.41462	1.48719	1.52918	1.30352	1.32695	1.4913	1.42577	1.17735	0.971661	1.28951	1.24321	1.25226	1.19371	1.42139	1.49238	1.11309	1.37768	1.26878	1.4983	1.29276	1.2736	1.27801	1.1295	1.37844	1.28553	1.22692	1.32093	1.33956	1.5301	1.15828	1.81127	1.31917	1.48371	1.20816	1.27799	1.25007	1.45315	1.33008
	11.5297	1.33964	1.26302	1.3358	1.37541	1.35287	1.37086	1.30712	1.2308	1.22107	1.34766	1.41037	1.51119	1.49264	1.29557	1.31664	1.43188	1.47953	1.19189	0.963439	1.34976	1.24292	1.22957	1.19504	1.42942	1.50303	1.14998	1.39755	1.27395	1.45718	1.26255	1.24971	1.24118	1.15047	1.31519	1.29453	1.2542	1.28385	1.30579	1.50766	1.19197	1.7553	1.32512	1.45106	1.22235	1.33209	1.27007	1.44179	1.34642
	11.563	1.34516	1.30206	1.34998	1.34479	1.33509	1.38004	1.33529	1.22808	1.24532	1.34712	1.43037	1.52746	1.45837	1.3152	1.31282	1.50253	1.44727	1.22657	0.961762	1.28416	1.25826	1.24668	1.17857	1.42026	1.5303	1.13316	1.39709	1.24166	1.47046	1.26756	1.25161	1.28188	1.15723	1.30258	1.28832	1.24843	1.29483	1.32198	1.51901	1.21761	1.76174	1.35823	1.41462	1.22021	1.25615	1.30598	1.48763	1.40148
	11.5963	1.36393	1.27164	1.32719	1.42963	1.41322	1.34217	1.32752	1.23793	1.23872	1.33758	1.43844	1.53357	1.50319	1.32414	1.37249	1.52135	1.43931	1.20251	0.992229	1.2903	1.22502	1.22411	1.1673	1.36445	1.55067	1.15179	1.38685	1.26032	1.48402	1.29078	1.24248	1.29938	1.13091	1.32177	1.29203	1.26112	1.28639	1.34817	1.5257	1.17468	1.7796	1.31322	1.4139	1.24049	1.29347	1.26696	1.47018	1.39292
	11.6297	1.36716	1.31782	1.33058	1.39175	1.34336	1.3752	1.32341	1.23553	1.24541	1.36396	1.42718	1.56523	1.4775	1.31527	1.35434	1.48633	1.39648	1.19676	0.972356	1.33098	1.251	1.25653	1.17023	1.44484	1.49744	1.14477	1.38642	1.25402	1.4964	1.2934	1.26743	1.34421	1.15916	1.30935	1.32119	1.25244	1.28476	1.30169	1.49784	1.19821	1.79953	1.33055	1.42891	1.22997	1.29753	1.24079	1.49432	1.38166
	11.663	1.35886	1.29296	1.36007	1.35142	1.35396	1.37251	1.3139	1.2146	1.23534	1.29572	1.38122	1.5692	1.47744	1.30379	1.30837	1.47106	1.43616	1.17649	0.960128	1.26926	1.2488	1.22908	1.17514	1.39542	1.48387	1.15299	1.36741	1.25643	1.4648	1.25825	1.2665	1.37472	1.13635	1.29272	1.30271	1.25625	1.30205	1.27974	1.53653	1.17612	1.70758	1.32142	1.44782	1.18983	1.26129	1.2958	1.47844	1.39319
	11.6964	1.33146	1.27273	1.30409	1.34723	1.33404	1.36275	1.30497	1.2075	1.21877	1.32928	1.40207	1.53011	1.48491	1.32268	1.29359	1.50626	1.45598	1.22847	0.944936	1.27071	1.20018	1.17749	1.23045	1.37482	1.47036	1.1478	1.35933	1.23147	1.43578	1.27554	1.22904	1.31725	1.1361	1.37009	1.28906	1.2496	1.31985	1.29253	1.53735	1.1815	1.69564	1.30205	1.39638	1.1448	1.33865	1.28921	1.45006	1.35896
	11.7297	1.37078	1.29559	1.33905	1.40168	1.3586	1.35643	1.29129	1.22616	1.20997	1.34323	1.41508	1.56527	1.44489	1.30434	1.32436	1.45319	1.47489	1.18225	0.957825	1.29317	1.22311	1.25089	1.21157	1.36659	1.48116	1.12607	1.37569	1.22487	1.46044	1.26475	1.24015	1.33713	1.13692	1.35615	1.3096	1.23295	1.35882	1.30396	1.52013	1.19149	1.7	1.32144	1.46569	1.18396	1.25665	1.23554	1.47564	1.35992
	11.763	1.32483	1.29901	1.30871	1.40125	1.34696	1.35948	1.3203	1.23642	1.19669	1.36555	1.40824	1.56804	1.45191	1.28095	1.2961	1.39917	1.42661	1.17308	0.983458	1.29949	1.18119	1.21551	1.18265	1.3713	1.43313	1.11065	1.37649	1.23773	1.48036	1.27779	1.25539	1.37981	1.13518	1.32184	1.27576	1.25569	1.28451	1.26622	1.45365	1.17034	1.69246	1.31496	1.44636	1.21103	1.3154	1.27916	1.43628	1.411
	11.7964	1.35747	1.30618	1.31054	1.39394	1.31206	1.38875	1.31172	1.22185	1.2315	1.31092	1.3798	1.55629	1.42347	1.29098	1.37651	1.5038	1.40622	1.19292	0.991186	1.28997	1.21064	1.19078	1.224	1.40931	1.44182	1.15956	1.35485	1.22526	1.43781	1.23571	1.24788	1.30044	1.09594	1.32557	1.30051	1.24524	1.32752	1.28406	1.5092	1.17309	1.71263	1.30125	1.39533	1.21119	1.23962	1.26425	1.42254	1.3838
	11.8297	1.34184	1.2703	1.32334	1.40934	1.3486	1.38123	1.28075	1.21501	1.25374	1.34287	1.41934	1.59387	1.44584	1.297	1.33335	1.46157	1.47706	1.18703	0.965613	1.28152	1.2338	1.21989	1.21904	1.40958	1.46474	1.14881	1.36794	1.23294	1.51461	1.26781	1.25542	1.3619	1.11795	1.43972	1.29721	1.21821	1.2708	1.2807	1.52895	1.2217	1.73699	1.34405	1.48364	1.15325	1.2501	1.29559	1.46757	1.37643
	11.863	1.29998	1.25571	1.32902	1.36997	1.34374	1.36566	1.27847	1.20199	1.2325	1.33505	1.40531	1.58017	1.48405	1.29439	1.33043	1.46842	1.4782	1.18591	0.982243	1.25823	1.21739	1.22262	1.19242	1.43127	1.47609	1.1355	1.41149	1.21003	1.45539	1.25412	1.2672	1.39157	1.15138	1.37246	1.31039	1.26035	1.29501	1.26115	1.53258	1.17558	1.68104	1.327	1.42291	1.27353	1.27611	1.27658	1.47676	1.38357
	11.8964	1.33986	1.31164	1.35982	1.38714	1.33063	1.3979	1.28143	1.20967	1.25523	1.30871	1.38106	1.57236	1.4703	1.32376	1.31605	1.45823	1.45812	1.1911	0.990612	1.29152	1.22602	1.24485	1.19833	1.39561	1.46742	1.15156	1.3916	1.22799	1.46002	1.24902	1.25637	1.36874	1.14831	1.37618	1.3067	1.21503	1.32172	1.26536	1.52095	1.16925	1.70852	1.33336	1.41877	1.21048	1.31087	1.28751	1.48452	1.33708
	11.9297	1.31914	1.26558	1.34074	1.35247	1.34239	1.40878	1.27517	1.21124	1.25153	1.33236	1.41352	1.56094	1.48318	1.31593	1.33879	1.46615	1.44883	1.18622	0.952168	1.26159	1.23278	1.17253	1.23894	1.40708	1.44669	1.13036	1.41104	1.23427	1.50062	1.27245	1.23058	1.41348	1.11229	1.4156	1.3113	1.21788	1.32709	1.26779	1.54001	1.17979	1.66674	1.31062	1.42949	1.26311	1.28016	1.31482	1.45485	1.36494
	11.963	1.32024	1.2567	1.32546	1.36859	1.32364	1.3884	1.25197	1.19658	1.22795	1.34307	1.37636	1.55738	1.465	1.29455	1.30685	1.41418	1.44041	1.18125	0.967654	1.27389	1.17398	1.24023	1.25103	1.39419	1.41605	1.14701	1.37712	1.21338	1.45323	1.2431	1.23695	1.36735	1.12541	1.40026	1.27228	1.20418	1.33878	1.23984	1.56688	1.16007	1.70888	1.30974	1.38144	1.23407	1.29906	1.26196	1.43451	1.30055
	11.9963	1.35124	1.26095	1.3232	1.36547	1.33565	1.42526	1.26682	1.22386	1.2356	1.35628	1.42397	1.5797	1.48649	1.33981	1.32065	1.4907	1.4363	1.20951	0.991235	1.31662	1.18652	1.24251	1.22211	1.38816	1.47301	1.18375	1.41487	1.22514	1.48665	1.27582	1.26116	1.45662	1.1424	1.44537	1.32008	1.24985	1.38513	1.29471	1.66854	1.16101	1.70066	1.322	1.43343	1.22208	1.23728	1.31707	1.43722	1.33062
	12.0297	1.31966	1.2994	1.33569	1.37407	1.29877	1.40773	1.23806	1.19505	1.26431	1.30354	1.39039	1.54007	1.49438	1.31756	1.33022	1.46924	1.4531	1.18185	0.979788	1.29305	1.19208	1.20867	1.18954	1.3683	1.46157	1.08359	1.3846	1.22643	1.46688	1.27485	1.24703	1.39121	1.13381	1.4346	1.30746	1.24481	1.35082	1.25673	1.63574	1.18932	1.73141	1.35323	1.4182	1.21903	1.20143	1.31141	1.48844	1.32434
	12.063	1.33052	1.27734	1.31395	1.39855	1.31994	1.36723	1.25512	1.2147	1.25053	1.31913	1.42997	1.51726	1.46888	1.29222	1.28353	1.46769	1.43768	1.14265	0.97266	1.25945	1.22272	1.20449	1.22221	1.33997	1.48074	1.08765	1.38797	1.25162	1.44992	1.25378	1.2545	1.40837	1.11493	1.40336	1.32506	1.24257	1.3479	1.27105	1.6981	1.13976	1.65104	1.32079	1.41087	1.1988	1.25682	1.26464	1.46405	1.32567
	12.0963	1.32394	1.29568	1.33662	1.37977	1.33427	1.4094	1.29449	1.21579	1.24475	1.32317	1.40725	1.56538	1.50046	1.3067	1.32498	1.47125	1.43337	1.14542	0.963548	1.28525	1.19705	1.25324	1.25244	1.33653	1.49649	1.14475	1.39645	1.22494	1.47372	1.26713	1.22974	1.42982	1.10131	1.37956	1.29415	1.21408	1.40649	1.27144	1.77065	1.19501	1.68377	1.34431	1.43807	1.25856	1.2184	1.33108	1.45771	1.37414
	12.1297	1.31495	1.24467	1.31594	1.3557	1.28542	1.3866	1.25713	1.21238	1.22797	1.33387	1.41948	1.55828	1.4705	1.28157	1.32586	1.4383	1.48674	1.17479	0.963289	1.26148	1.1545	1.19176	1.23765	1.39001	1.50426	1.10973	1.35765	1.24819	1.47606	1.23692	1.215	1.38727	1.12508	1.46818	1.32115	1.24933	1.37556	1.2827	1.72362	1.14867	1.67543	1.35144	1.42366	1.21206	1.23368	1.33442	1.50361	1.29203
	12.163	1.33447	1.30393	1.31651	1.39629	1.28665	1.41212	1.26551	1.20687	1.23682	1.34574	1.412	1.56439	1.44641	1.23672	1.31236	1.4785	1.48935	1.20625	0.96746	1.25881	1.18547	1.23049	1.20283	1.35202	1.43271	1.15036	1.3819	1.20641	1.4265	1.24788	1.22663	1.42352	1.09171	1.3981	1.28697	1.2284	1.36067	1.32442	1.76624	1.17887	1.67615	1.3437	1.36719	1.21444	1.24386	1.30175	1.47232	1.3316
	12.1964	1.3182	1.28068	1.31246	1.40231	1.31584	1.3999	1.25978	1.20672	1.22774	1.30698	1.44117	1.55658	1.48172	1.29118	1.32395	1.50987	1.44054	1.20026	0.97894	1.29765	1.20397	1.23838	1.23067	1.37137	1.47237	1.11859	1.40062	1.23503	1.42519	1.2548	1.23994	1.35826	1.10316	1.43496	1.30799	1.27322	1.3432	1.27866	1.74233	1.17286	1.67049	1.32558	1.43348	1.1997	1.24367	1.31417	1.43856	1.31618
	12.2297	1.35707	1.31304	1.3049	1.35731	1.29936	1.39864	1.26628	1.1934	1.24441	1.31533	1.41836	1.58128	1.47107	1.27623	1.3233	1.44434	1.49168	1.22109	0.963531	1.27739	1.13375	1.21545	1.19795	1.38775	1.4624	1.21802	1.38294	1.22264	1.46311	1.21854	1.23237	1.4007	1.08998	1.398	1.29075	1.2178	1.35103	1.28556	1.75302	1.17368	1.66737	1.30711	1.42456	1.21849	1.27755	1.33048	1.42856	1.35282
	12.263	1.30502	1.29884	1.3147	1.36033	1.32792	1.39861	1.24255	1.20881	1.2104	1.32858	1.40788	1.54889	1.49443	1.22784	1.30319	1.4549	1.42346	1.15312	1.00219	1.22635	1.1351	1.21697	1.21154	1.34183	1.48053	1.18354	1.35201	1.22585	1.43718	1.22212	1.21258	1.42648	1.08668	1.40281	1.32789	1.23708	1.36672	1.27715	1.73662	1.13238	1.6939	1.323	1.41898	1.23525	1.23673	1.30757	1.47496	1.27923
	12.2964	1.37002	1.29701	1.34426	1.34817	1.29129	1.38352	1.24346	1.19799	1.26314	1.32663	1.43529	1.57365	1.49086	1.21163	1.27267	1.46618	1.40334	1.1883	1.03592	1.29034	1.16199	1.23668	1.18617	1.34379	1.49603	1.22574	1.35901	1.25497	1.4063	1.21585	1.25876	1.37348	1.09719	1.43644	1.32572	1.24167	1.3352	1.27289	1.73228	1.10703	1.64854	1.36067	1.40451	1.19113	1.26117	1.29037	1.4162	1.31333
	12.3297	1.31348	1.29444	1.29631	1.34919	1.28191	1.34769	1.24249	1.18947	1.20726	1.34702	1.41733	1.54649	1.48733	1.19274	1.31755	1.44058	1.48405	1.15626	1.08498	1.25466	1.12375	1.22682	1.15761	1.32706	1.45279	1.311	1.38921	1.23344	1.42308	1.22817	1.22524	1.4044	1.08669	1.39261	1.28282	1.22938	1.28777	1.27839	1.66572	1.15858	1.647	1.33045	1.36465	1.21541	1.24085	1.26433	1.38816	1.33136
	12.363	1.29473	1.2645	1.31936	1.35518	1.29462	1.37552	1.22426	1.17199	1.2241	1.35108	1.46205	1.55307	1.44662	1.19719	1.32475	1.43135	1.41992	1.24313	1.12831	1.26849	1.18365	1.22746	1.19931	1.31245	1.45379	1.27939	1.37923	1.274	1.36316	1.20615	1.26006	1.40963	1.08532	1.39888	1.29987	1.21819	1.33036	1.27612	1.66088	1.11266	1.66761	1.33066	1.37658	1.22326	1.25558	1.31257	1.3771	1.23077
	12.3963	1.30516	1.24706	1.31963	1.37361	1.28326	1.37417	1.2213	1.19343	1.23172	1.32592	1.43197	1.57744	1.51016	1.17387	1.29475	1.46454	1.45844	1.18771	1.17688	1.27053	1.18827	1.21678	1.20457	1.33751	1.457	1.28104	1.34354	1.29267	1.44084	1.2327	1.22958	1.38558	1.07359	1.43883	1.33968	1.21843	1.29458	1.26171	1.65316	1.12771	1.62817	1.33141	1.40615	1.22905	1.30173	1.27012	1.39709	1.30889
	12.4297	1.31994	1.24476	1.32382	1.3344	1.28957	1.37099	1.26985	1.19859	1.24346	1.30608	1.43775	1.57122	1.48117	1.16192	1.31997	1.43596	1.4076	1.18186	1.22792	1.26046	1.15767	1.21825	1.17113	1.35448	1.45042	1.29977	1.34105	1.32387	1.43681	1.22518	1.22525	1.35065	1.07359	1.42062	1.35173	1.23827	1.30623	1.25983	1.62151	1.14466	1.62298	1.32781	1.41208	1.22497	1.31804	1.30367	1.40403	1.32341
	12.463	1.32393	1.25777	1.31381	1.37607	1.36977	1.35523	1.23483	1.19881	1.23126	1.29571	1.47978	1.57976	1.47262	1.15606	1.30328	1.46852	1.47111	1.2037	1.27077	1.25976	1.18596	1.26637	1.17413	1.31449	1.4725	1.3506	1.37138	1.33926	1.4527	1.21887	1.27082	1.41521	1.11591	1.43263	1.35141	1.2247	1.2739	1.26672	1.63302	1.13534	1.59407	1.35721	1.40947	1.21637	1.28311	1.31518	1.4342	1.2394
	12.4964	1.29034	1.29656	1.29134	1.3269	1.31804	1.34005	1.21898	1.19962	1.22685	1.3289	1.38909	1.5572	1.52829	1.16759	1.30087	1.40732	1.43934	1.17059	1.31244	1.27014	1.2279	1.20803	1.20473	1.29386	1.44457	1.35802	1.34539	1.34784	1.46331	1.21832	1.24209	1.4269	1.09111	1.41403	1.3597	1.21465	1.32162	1.24876	1.61545	1.12538	1.61913	1.34433	1.44606	1.24646	1.25331	1.31578	1.41954	1.29912
	12.5297	1.31598	1.25864	1.29841	1.36898	1.29814	1.32955	1.26174	1.19472	1.22303	1.36061	1.44003	1.54583	1.45097	1.12568	1.28925	1.46158	1.43129	1.1908	1.33163	1.25915	1.19935	1.2375	1.17829	1.33455	1.47645	1.37061	1.35417	1.37782	1.42247	1.22299	1.23323	1.34082	1.04535	1.40175	1.39226	1.23416	1.31347	1.25368	1.626	1.12509	1.63545	1.31233	1.34659	1.19539	1.27957	1.30304	1.37685	1.28283
	12.5631	1.29484	1.25379	1.31537	1.36389	1.27548	1.34066	1.20713	1.21793	1.22658	1.32607	1.40582	1.55115	1.4933	1.11101	1.31524	1.44029	1.40783	1.23363	1.37908	1.27217	1.18303	1.20256	1.1613	1.29974	1.4817	1.37332	1.34001	1.33963	1.48376	1.20754	1.22295	1.39146	1.0681	1.41105	1.38214	1.21792	1.30187	1.26823	1.59272	1.09762	1.60427	1.35744	1.40533	1.2595	1.27468	1.33081	1.43039	1.31416
	12.5964	1.30815	1.28393	1.27912	1.31705	1.34594	1.37865	1.20095	1.2085	1.21383	1.33107	1.43183	1.53482	1.47864	1.10925	1.30238	1.48005	1.41284	1.19913	1.37432	1.24986	1.22315	1.23156	1.20435	1.33616	1.45019	1.36591	1.36345	1.32766	1.49341	1.21859	1.22681	1.42171	1.0791	1.38353	1.38105	1.23758	1.28368	1.24923	1.60973	1.14662	1.65563	1.39247	1.40155	1.22806	1.2601	1.32062	1.42732	1.24816
	12.6297	1.2956	1.25222	1.29936	1.39091	1.30399	1.35058	1.24381	1.20788	1.23912	1.28527	1.44335	1.53016	1.5075	1.09837	1.26102	1.42427	1.41422	1.18537	1.39804	1.24836	1.16485	1.25074	1.18786	1.33409	1.47982	1.38959	1.36254	1.33639	1.47376	1.22727	1.20135	1.38358	1.09458	1.38588	1.35525	1.23475	1.25477	1.23646	1.56869	1.142	1.61839	1.32351	1.39863	1.25733	1.24603	1.3134	1.38118	1.22618
	12.663	1.31686	1.29845	1.28719	1.37758	1.30443	1.36029	1.23994	1.21241	1.22735	1.34195	1.43155	1.54007	1.50061	1.10128	1.29177	1.4191	1.40362	1.21585	1.44395	1.29058	1.2015	1.24055	1.20896	1.33584	1.46933	1.33892	1.37272	1.33556	1.47996	1.25008	1.24005	1.41495	1.10627	1.41752	1.36041	1.21864	1.27524	1.27528	1.56449	1.1596	1.60273	1.32105	1.42943	1.21585	1.25092	1.34128	1.42065	1.25137
	12.6963	1.29765	1.26801	1.28212	1.35478	1.26302	1.35801	1.23996	1.21913	1.21195	1.31465	1.4464	1.5146	1.48074	1.09857	1.29312	1.44644	1.39029	1.19457	1.4275	1.28581	1.19102	1.22157	1.20053	1.33312	1.46239	1.37104	1.36449	1.27641	1.45974	1.24027	1.24095	1.39014	1.08001	1.40209	1.35673	1.24412	1.21801	1.21043	1.56191	1.15035	1.62639	1.35874	1.38272	1.25759	1.23891	1.29021	1.39348	1.20553
	12.7297	1.30512	1.28092	1.28894	1.35721	1.28827	1.3563	1.22827	1.20793	1.2005	1.31834	1.45473	1.52341	1.44513	1.09775	1.29278	1.5103	1.41444	1.16553	1.43058	1.28592	1.21479	1.2366	1.18192	1.35401	1.49198	1.34919	1.3943	1.29032	1.46578	1.22716	1.21312	1.38037	1.07642	1.37695	1.38184	1.23159	1.22245	1.23957	1.62514	1.12977	1.6125	1.32317	1.41151	1.24047	1.28115	1.28271	1.41468	1.24273
	12.763	1.3132	1.27332	1.29167	1.33275	1.3024	1.38046	1.19741	1.21815	1.22622	1.33634	1.42057	1.49946	1.43119	1.07108	1.28775	1.51417	1.42642	1.20068	1.44997	1.29242	1.16218	1.24245	1.15959	1.32841	1.45309	1.37662	1.35267	1.29286	1.4831	1.22756	1.24966	1.3855	1.10878	1.36259	1.39116	1.23666	1.24345	1.24029	1.59198	1.13849	1.60581	1.27383	1.43465	1.24113	1.31216	1.29571	1.39985	1.27024
	12.7964	1.3012	1.27796	1.28004	1.33872	1.27358	1.33414	1.22632	1.21548	1.19165	1.224	1.40955	1.45591	1.47933	1.07421	1.27658	1.43593	1.39168	1.20098	1.44342	1.23405	1.15987	1.21313	1.15068	1.30811	1.48237	1.34855	1.30537	1.28209	1.50548	1.23553	1.24219	1.32756	1.07291	1.35769	1.31413	1.19761	1.23227	1.22657	1.58784	1.11648	1.61771	1.32841	1.41741	1.23666	1.27471	1.26999	1.3956	1.20277
	12.8297	1.33193	1.27775	1.2874	1.3642	1.32608	1.37957	1.24058	1.23155	1.23689	1.29356	1.42088	1.49717	1.46708	1.08523	1.30371	1.4676	1.4271	1.17749	1.47729	1.24526	1.14797	1.25242	1.16377	1.34745	1.49372	1.33446	1.39088	1.23279	1.5017	1.22199	1.22849	1.368	1.12621	1.43379	1.30937	1.25545	1.21062	1.26582	1.66064	1.12902	1.62197	1.3349	1.42054	1.24463	1.27955	1.30341	1.4154	1.2544
	12.863	1.323	1.33312	1.31959	1.39579	1.26782	1.40414	1.26936	1.22435	1.24255	1.26716	1.44903	1.48887	1.48127	1.07632	1.29429	1.47928	1.37978	1.19972	1.48122	1.29162	1.16591	1.23187	1.15633	1.35697	1.49039	1.37272	1.40704	1.24832	1.52335	1.2472	1.26692	1.3452	1.10246	1.41756	1.39778	1.24018	1.26068	1.26976	1.66379	1.14335	1.61158	1.3558	1.44022	1.25215	1.29037	1.34039	1.36963	1.28756
	12.8964	1.31607	1.28953	1.29431	1.33146	1.31961	1.35095	1.2345	1.21327	1.21488	1.26737	1.42334	1.48283	1.46609	1.07549	1.28639	1.45511	1.43507	1.1851	1.45557	1.27934	1.16691	1.21144	1.17942	1.27437	1.46456	1.37556	1.36287	1.26101	1.48631	1.2615	1.23609	1.3036	1.11058	1.39166	1.36597	1.19528	1.19006	1.23145	1.6203	1.15782	1.61027	1.30555	1.41911	1.27346	1.33064	1.35637	1.40034	1.24711
	12.9296	1.28376	1.2752	1.28628	1.37681	1.33715	1.37978	1.22683	1.21907	1.22906	1.30301	1.45348	1.45495	1.47191	1.06912	1.27233	1.45703	1.44513	1.17315	1.43536	1.28993	1.22162	1.22274	1.18468	1.34132	1.44528	1.35697	1.38426	1.22365	1.47749	1.22059	1.23127	1.32478	1.14322	1.38662	1.3562	1.23516	1.22527	1.26194	1.62545	1.11891	1.5914	1.31391	1.40554	1.33797	1.30943	1.29369	1.37287	1.26682
	12.963	1.30473	1.27765	1.30164	1.34785	1.31225	1.39695	1.24735	1.19893	1.28208	1.32317	1.47363	1.42611	1.44959	1.08731	1.2469	1.45724	1.40737	1.21544	1.46941	1.29413	1.19713	1.20628	1.16622	1.34247	1.40901	1.30375	1.3835	1.21891	1.46708	1.21329	1.22036	1.41841	1.1541	1.42488	1.45392	1.25903	1.19908	1.25353	1.66701	1.13586	1.63049	1.29033	1.39547	1.24692	1.35886	1.34252	1.45319	1.28585
	12.9963	1.30895	1.31034	1.27165	1.37759	1.25557	1.35251	1.21058	1.21225	1.20096	1.24459	1.42743	1.43151	1.43061	1.08325	1.27439	1.48088	1.39799	1.18829	1.36626	1.30239	1.16701	1.20337	1.14156	1.36707	1.44908	1.34992	1.39132	1.17705	1.48742	1.22451	1.2064	1.34212	1.10255	1.44625	1.33289	1.22857	1.19338	1.21276	1.62062	1.10988	1.57846	1.30604	1.38417	1.28754	1.32939	1.33729	1.38409	1.24118
	13.0297	1.30077	1.31862	1.2892	1.36892	1.28372	1.36399	1.25134	1.21655	1.19586	1.28267	1.4615	1.42167	1.45533	1.1087	1.32362	1.43612	1.43043	1.23278	1.36204	1.26904	1.19811	1.24945	1.16099	1.39289	1.47388	1.35739	1.40543	1.22042	1.49213	1.22855	1.24678	1.31282	1.11543	1.4252	1.37478	1.22981	1.18915	1.21731	1.61208	1.15437	1.60899	1.28812	1.42176	1.21724	1.33096	1.32499	1.41218	1.28
	13.063	1.29351	1.29077	1.28949	1.3762	1.28665	1.37522	1.23072	1.21052	1.23248	1.30196	1.47407	1.42412	1.43049	1.12325	1.30445	1.4553	1.4193	1.21985	1.31514	1.26853	1.18965	1.26039	1.19101	1.35908	1.46916	1.30792	1.44305	1.21427	1.49519	1.19597	1.22688	1.39373	1.14557	1.40498	1.33038	1.25238	1.19902	1.24201	1.61727	1.17805	1.59674	1.32063	1.43349	1.26508	1.31794	1.31294	1.42483	1.22894
	13.0963	1.28638	1.31989	1.29556	1.36772	1.28472	1.37995	1.26348	1.20046	1.23874	1.31837	1.50912	1.41344	1.51337	1.11785	1.31735	1.51588	1.43717	1.22896	1.33526	1.27481	1.24364	1.21646	1.19283	1.35186	1.41523	1.32942	1.41742	1.23024	1.51395	1.23531	1.24383	1.3639	1.11334	1.41406	1.35307	1.2431	1.16741	1.26027	1.56289	1.16395	1.59299	1.30974	1.42779	1.2394	1.32271	1.35283	1.44613	1.27801
	13.1297	1.30041	1.29771	1.27317	1.39387	1.3034	1.37514	1.26461	1.20318	1.28507	1.27652	1.46777	1.41288	1.47081	1.15869	1.34196	1.43275	1.45366	1.20381	1.30949	1.33127	1.21735	1.22543	1.17427	1.34604	1.45953	1.30717	1.42452	1.19301	1.53519	1.24099	1.25884	1.38143	1.14825	1.49945	1.41135	1.22382	1.19163	1.24361	1.56655	1.11469	1.5227	1.31748	1.45886	1.29826	1.36366	1.33092	1.45501	1.21911
	13.1631	1.31561	1.30311	1.29936	1.40308	1.31408	1.37294	1.24533	1.18266	1.2517	1.35047	1.47448	1.3806	1.4481	1.16068	1.33057	1.49033	1.45803	1.21806	1.24262	1.2718	1.22494	1.23388	1.15904	1.34727	1.4299	1.32098	1.41485	1.18947	1.47346	1.22874	1.25701	1.32363	1.12072	1.44199	1.29882	1.25396	1.18157	1.27727	1.55495	1.15392	1.55451	1.31568	1.39602	1.23395	1.34745	1.32189	1.44797	1.24498
	13.1964	1.29215	1.29729	1.31544	1.42808	1.30652	1.40746	1.23744	1.17985	1.25189	1.32136	1.47209	1.36753	1.46768	1.157	1.32751	1.48847	1.42218	1.23232	1.24714	1.31931	1.25959	1.21832	1.1726	1.35438	1.41586	1.3171	1.41385	1.17078	1.49212	1.23767	1.24985	1.29944	1.11776	1.44819	1.31923	1.283	1.20601	1.22946	1.55938	1.16659	1.58795	1.30524	1.43385	1.32162	1.36194	1.30428	1.46054	1.34856
	13.2297	1.28637	1.31535	1.29068	1.41554	1.26843	1.36381	1.29671	1.18777	1.2367	1.29377	1.47248	1.39084	1.46761	1.15814	1.36692	1.46432	1.40534	1.21687	1.23388	1.29638	1.2346	1.24579	1.19741	1.369	1.42296	1.30584	1.41392	1.14738	1.46598	1.20837	1.23369	1.34855	1.14594	1.35142	1.32532	1.25275	1.18619	1.23928	1.54427	1.13773	1.58892	1.29427	1.43217	1.27736	1.32347	1.28259	1.42456	1.23321
	13.263	1.29097	1.31276	1.26365	1.38524	1.23703	1.36967	1.25335	1.20034	1.25318	1.30919	1.48416	1.34127	1.4795	1.13321	1.28841	1.44328	1.34744	1.26439	1.1882	1.28358	1.18621	1.18227	1.17878	1.36333	1.41961	1.31947	1.42545	1.1862	1.48124	1.25232	1.255	1.32693	1.09878	1.44686	1.3013	1.26532	1.12864	1.22614	1.51697	1.13265	1.5584	1.29617	1.42237	1.25183	1.33708	1.26353	1.44391	1.25471
	13.2964	1.29146	1.2825	1.26281	1.40156	1.30878	1.38885	1.25202	1.18677	1.24377	1.33106	1.48737	1.38679	1.46271	1.17991	1.27415	1.45672	1.3922	1.18695	1.16889	1.28533	1.21807	1.23307	1.15598	1.36021	1.42532	1.28437	1.42861	1.16957	1.51965	1.23112	1.2479	1.33124	1.10352	1.3807	1.26772	1.26323	1.12205	1.25903	1.50662	1.14423	1.54397	1.28901	1.35309	1.29958	1.35454	1.29513	1.43424	1.26222
	13.3297	1.29607	1.2884	1.27811	1.43386	1.26356	1.33589	1.262	1.19655	1.28356	1.3134	1.4573	1.34912	1.48069	1.16441	1.30011	1.46127	1.38454	1.21222	1.15062	1.29275	1.20944	1.19541	1.16194	1.33681	1.4153	1.29554	1.39995	1.16423	1.47837	1.20109	1.24027	1.33594	1.09803	1.33523	1.30872	1.22654	1.11393	1.1934	1.47615	1.13274	1.55781	1.29465	1.39275	1.24323	1.34322	1.28569	1.40225	1.24107
	13.363	1.29837	1.24979	1.27072	1.42574	1.2721	1.33646	1.25637	1.18929	1.27014	1.32075	1.45753	1.35254	1.45217	1.15004	1.31767	1.46236	1.3527	1.24105	1.13303	1.21483	1.24236	1.19834	1.15054	1.3638	1.3938	1.31485	1.43457	1.13848	1.50138	1.20178	1.20714	1.29141	1.11085	1.4272	1.29411	1.21707	1.11721	1.21702	1.42922	1.1374	1.52596	1.25877	1.39712	1.26165	1.35179	1.27579	1.40352	1.21453
	13.3964	1.29662	1.27814	1.25364	1.40566	1.26054	1.35119	1.24911	1.17332	1.25663	1.37618	1.47477	1.32602	1.46265	1.13933	1.29576	1.41622	1.31687	1.23658	1.09918	1.26285	1.20943	1.17402	1.12996	1.33715	1.40101	1.2808	1.40054	1.14143	1.49277	1.18447	1.20287	1.29561	1.08713	1.38784	1.29674	1.21713	1.0995	1.16444	1.42829	1.14363	1.56202	1.22675	1.34792	1.22437	1.35099	1.27072	1.35923	1.21958
	13.4297	1.28562	1.26694	1.24253	1.40234	1.25821	1.33422	1.27079	1.18158	1.25241	1.28475	1.45773	1.30629	1.46437	1.15925	1.32844	1.41638	1.34696	1.22889	1.06259	1.21815	1.20928	1.17118	1.1524	1.32293	1.36843	1.35884	1.40328	1.14262	1.48601	1.21167	1.18884	1.29844	1.04399	1.40338	1.28391	1.23791	1.09681	1.17574	1.39742	1.12133	1.56032	1.25875	1.34834	1.22644	1.2879	1.23257	1.36752	1.26479
	13.4631	1.27776	1.27025	1.22161	1.38093	1.2266	1.32779	1.21913	1.19627	1.24118	1.29338	1.46795	1.32467	1.41754	1.12524	1.26079	1.4193	1.30662	1.19673	1.08577	1.23471	1.2167	1.14071	1.14386	1.33812	1.41538	1.33702	1.40446	1.13015	1.49303	1.18877	1.18751	1.32616	1.04841	1.37049	1.27907	1.2067	1.09687	1.15438	1.37646	1.09224	1.54505	1.2325	1.3963	1.21439	1.29958	1.25101	1.33149	1.27606
	13.4964	1.2671	1.24622	1.19434	1.37297	1.24879	1.34491	1.21044	1.15707	1.23418	1.30653	1.45579	1.29008	1.47572	1.15045	1.2613	1.41793	1.3234	1.22314	1.06072	1.2083	1.18311	1.13575	1.12141	1.37657	1.40031	1.36858	1.38223	1.09046	1.42746	1.15343	1.16852	1.31897	1.03669	1.31188	1.25238	1.24102	1.08872	1.14291	1.37914	1.07917	1.57811	1.28029	1.36992	1.23291	1.301	1.20303	1.34691	1.20695
	13.5297	1.23415	1.2355	1.19204	1.36224	1.23908	1.29904	1.17124	1.15394	1.21968	1.30524	1.40649	1.25994	1.43871	1.11426	1.27096	1.36863	1.32618	1.19055	1.05545	1.22026	1.20707	1.12146	1.11007	1.33428	1.37169	1.28351	1.36248	1.12889	1.46148	1.15652	1.17699	1.29229	1.04118	1.29582	1.2911	1.18539	1.06293	1.1408	1.32245	1.10033	1.60308	1.23896	1.36525	1.22538	1.28719	1.21281	1.3712	1.23053
	13.563	1.22408	1.23747	1.19247	1.35936	1.24909	1.29712	1.22307	1.15653	1.23778	1.27738	1.41608	1.2521	1.40356	1.10581	1.21772	1.32455	1.29195	1.19201	1.00538	1.19231	1.19837	1.12335	1.08142	1.34089	1.37693	1.31092	1.36989	1.08112	1.44331	1.13804	1.15732	1.26736	1.02436	1.32721	1.22574	1.18741	1.03775	1.15287	1.36708	1.05302	1.57227	1.21179	1.35982	1.20404	1.34485	1.19116	1.35888	1.17298
	13.5963	1.20769	1.27545	1.18896	1.36427	1.23465	1.31899	1.17897	1.15211	1.21158	1.25736	1.39412	1.27286	1.42359	1.1097	1.25447	1.41671	1.32757	1.18096	0.996625	1.17953	1.21947	1.09089	1.11915	1.37153	1.38729	1.30525	1.38743	1.10193	1.43211	1.15151	1.17219	1.25614	1.0114	1.30637	1.24838	1.18173	1.07829	1.13339	1.34719	1.0447	1.56225	1.22425	1.35314	1.1698	1.29896	1.19173	1.31886	1.18077
	13.6297	1.24114	1.23405	1.17885	1.39391	1.21538	1.29564	1.17393	1.1535	1.21312	1.27432	1.45482	1.24011	1.41116	1.10878	1.27962	1.38321	1.2922	1.20361	1.01671	1.18148	1.2188	1.11083	1.08657	1.32495	1.39031	1.30683	1.37195	1.11087	1.44015	1.17457	1.17562	1.32857	1.00855	1.31665	1.25058	1.19528	1.07799	1.10447	1.30971	1.07027	1.63683	1.26313	1.34821	1.22867	1.3388	1.20615	1.3598	1.20214
	13.6631	1.23654	1.21196	1.17049	1.35462	1.2303	1.28974	1.17145	1.14765	1.1873	1.27868	1.43982	1.24386	1.42553	1.10757	1.30188	1.38706	1.30082	1.19369	0.975658	1.18602	1.20084	1.06613	1.08582	1.32564	1.35319	1.3352	1.37974	1.09747	1.39231	1.13209	1.13878	1.24019	1.01134	1.28913	1.22993	1.18639	1.07125	1.14098	1.36448	1.04951	1.59113	1.23744	1.32158	1.1544	1.28441	1.17474	1.32728	1.23583
	13.6964	1.22577	1.2181	1.16278	1.36504	1.19013	1.28829	1.16114	1.11227	1.20962	1.29783	1.4024	1.25674	1.46582	1.08799	1.285	1.36616	1.29879	1.17737	0.968861	1.17555	1.16588	1.04735	1.06181	1.32493	1.3462	1.34606	1.31995	1.12033	1.42659	1.14179	1.16607	1.2849	0.9873	1.26299	1.23326	1.17388	1.10527	1.09224	1.33663	1.03757	1.6122	1.18683	1.31549	1.17773	1.31241	1.14066	1.31315	1.19315
	13.7297	1.21374	1.23805	1.15972	1.34462	1.18762	1.28094	1.13058	1.1186	1.17847	1.25685	1.40614	1.27196	1.42077	1.09827	1.23348	1.34444	1.28099	1.17018	0.97212	1.13736	1.16444	1.05209	1.07511	1.307	1.3352	1.28551	1.35073	1.07804	1.43339	1.12939	1.13301	1.28844	0.970733	1.25028	1.2541	1.12195	1.09987	1.06126	1.30923	1.02938	1.61589	1.24776	1.3141	1.18512	1.31175	1.15182	1.34195	1.19394
	13.763	1.18617	1.1818	1.17955	1.31337	1.1827	1.2941	1.10638	1.12982	1.17021	1.25767	1.38177	1.27192	1.42781	1.08577	1.23165	1.37052	1.28918	1.17836	0.957683	1.1274	1.15763	1.06406	1.0918	1.31022	1.358	1.33289	1.34337	1.07524	1.41003	1.11732	1.13942	1.21567	0.975899	1.21897	1.2325	1.19221	1.11299	1.08041	1.3256	1.02102	1.62081	1.17434	1.26267	1.11816	1.35058	1.13176	1.27583	1.18772
	13.7963	1.18875	1.22031	1.16475	1.32516	1.22074	1.28059	1.09092	1.11807	1.1683	1.26149	1.38907	1.23567	1.41052	1.04979	1.21321	1.34819	1.2815	1.16987	0.960515	1.15595	1.14604	1.05446	1.06736	1.32741	1.32102	1.28811	1.31113	1.04964	1.42445	1.0854	1.13956	1.25836	0.9647	1.29432	1.24195	1.12519	1.09917	1.02705	1.32197	1.01332	1.62999	1.19752	1.30231	1.16871	1.3002	1.11202	1.33507	1.22012
	13.8297	1.18232	1.17899	1.16483	1.2826	1.1862	1.28113	1.08207	1.14668	1.17067	1.24384	1.38118	1.22936	1.39767	1.07845	1.24192	1.32245	1.26878	1.16073	0.95033	1.16882	1.18728	1.03859	1.03977	1.28491	1.32358	1.30386	1.32673	1.06037	1.34473	1.0867	1.13973	1.25581	0.940374	1.28796	1.19304	1.11882	1.12102	1.02515	1.28428	0.997612	1.60327	1.18707	1.28039	1.10828	1.35007	1.10081	1.26354	1.15977
	13.863	1.20474	1.18052	1.15147	1.30994	1.17098	1.29311	1.09366	1.1104	1.17687	1.25993	1.34972	1.24647	1.39447	1.06746	1.24565	1.35197	1.25556	1.18913	0.936523	1.16297	1.12807	1.05346	1.05597	1.30465	1.34002	1.28401	1.3406	1.06109	1.42011	1.10207	1.12371	1.30882	0.956918	1.28597	1.18294	1.15874	1.11625	1.05441	1.283	0.987534	1.6115	1.21803	1.25278	1.21108	1.30625	1.12724	1.33252	1.20494
	13.8963	1.17397	1.20985	1.13789	1.26433	1.21427	1.26148	1.09827	1.10335	1.15134	1.226	1.37538	1.25205	1.40866	1.03599	1.19032	1.35141	1.25456	1.1579	0.924032	1.1631	1.1263	1.01259	1.04671	1.30025	1.31128	1.26713	1.30241	1.03738	1.41073	1.07086	1.13947	1.22691	0.928627	1.22163	1.23763	1.12344	1.07645	1.04446	1.29792	0.982692	1.62358	1.21012	1.27555	1.14073	1.32359	1.10709	1.31956	1.17513
	13.9297	1.17668	1.19676	1.11803	1.29069	1.16721	1.25267	1.06214	1.10926	1.15286	1.25124	1.3308	1.24421	1.38943	1.00979	1.20338	1.36844	1.22057	1.14443	0.891056	1.14019	1.15894	1.00408	1.04745	1.25293	1.35664	1.27921	1.31579	1.04452	1.35924	1.07349	1.08309	1.23094	0.934002	1.23644	1.17518	1.12602	1.10314	1.01097	1.24905	0.977758	1.646	1.14375	1.27824	1.09734	1.25878	1.09776	1.27398	1.17074
	13.963	1.17612	1.14081	1.10901	1.26573	1.18667	1.27217	1.06928	1.10424	1.16228	1.21009	1.33215	1.23375	1.36251	1.01273	1.17958	1.32993	1.2102	1.16001	0.903823	1.17085	1.10736	1.00721	1.05513	1.29257	1.32453	1.28757	1.34003	1.03204	1.35264	1.05911	1.10673	1.2127	0.89986	1.1868	1.16333	1.1347	1.11482	1.01364	1.24943	0.955447	1.63864	1.19553	1.24964	1.11685	1.25891	1.07002	1.26005	1.15815
	13.9963	1.1581	1.14563	1.13285	1.28962	1.16901	1.25422	1.02645	1.10016	1.12926	1.21595	1.33467	1.22708	1.36754	0.992306	1.13894	1.3315	1.24503	1.12225	0.901517	1.16669	1.167	1.01255	1.00274	1.26132	1.33011	1.25668	1.29885	1.04767	1.35719	1.05813	1.10883	1.25572	0.899018	1.21834	1.11742	1.10345	1.09047	1.03552	1.27224	0.972918	1.628	1.13879	1.30767	1.10563	1.26107	1.07914	1.27389	1.20278
	14.0297	1.14013	1.12174	1.12146	1.28063	1.17674	1.26591	1.04156	1.11108	1.14249	1.22595	1.31757	1.18826	1.3895	0.983631	1.17281	1.3715	1.21267	1.17827	0.883651	1.14039	1.10085	1.00063	1.026	1.29219	1.32148	1.23937	1.29711	1.0486	1.33001	1.03095	1.08529	1.20581	0.885844	1.17697	1.15633	1.0918	1.06854	0.975626	1.24529	0.967763	1.57498	1.1338	1.25563	1.08429	1.24049	1.08187	1.28182	1.17343
	14.063	1.15823	1.1109	1.10829	1.25489	1.17302	1.2521	1.02757	1.08382	1.13022	1.19635	1.33597	1.19955	1.36068	0.958372	1.14306	1.33872	1.20571	1.13587	0.883474	1.11945	1.10343	0.983148	1.00049	1.26216	1.31268	1.2437	1.30452	1.02168	1.35713	1.01684	1.1097	1.16715	0.881575	1.19714	1.15427	1.10966	1.0561	0.972367	1.28454	0.964068	1.62671	1.12792	1.24166	1.10485	1.30902	1.03703	1.24561	1.14343
	14.0964	1.14993	1.11588	1.09384	1.2594	1.15182	1.24001	1.07037	1.07109	1.09589	1.18919	1.34135	1.16096	1.35284	0.957881	1.14417	1.38315	1.21007	1.13679	0.878287	1.14447	1.12576	0.976684	1.01623	1.25416	1.30922	1.2618	1.3368	1.02028	1.36953	1.02266	1.08508	1.18427	0.874335	1.1936	1.14583	1.09032	1.08398	0.992212	1.22099	0.94716	1.60423	1.14242	1.2537	1.07972	1.22941	1.02438	1.24966	1.17979
	14.1297	1.17103	1.12638	1.0901	1.27346	1.15543	1.27214	1.02789	1.07497	1.14843	1.20924	1.33976	1.16554	1.35498	0.962349	1.15932	1.38964	1.19472	1.1357	0.880275	1.11438	1.10203	0.968474	1.01178	1.2867	1.2867	1.21919	1.32786	1.03728	1.34277	1.01611	1.09229	1.19068	0.882538	1.23097	1.14162	1.1325	1.07669	0.986547	1.21569	0.933562	1.63592	1.10574	1.27306	1.07397	1.29108	1.04946	1.25824	1.16355
	14.163	1.14617	1.12299	1.0863	1.27149	1.18633	1.24153	1.03795	1.0739	1.12316	1.20429	1.32762	1.18641	1.35522	0.933638	1.17126	1.39569	1.21113	1.14361	0.859544	1.11753	1.10572	0.962542	1.01402	1.25647	1.3265	1.24137	1.28431	1.04347	1.34116	1.00721	1.09016	1.18562	0.883626	1.23383	1.1528	1.09978	1.10923	0.925348	1.22879	0.929269	1.6368	1.13564	1.26427	1.07162	1.2454	0.984932	1.27282	1.20185
	14.1964	1.1374	1.11866	1.08529	1.23244	1.13584	1.21082	0.99495	1.06939	1.07783	1.19637	1.28703	1.14938	1.36244	0.926136	1.15777	1.29673	1.19349	1.14727	0.819817	1.10546	1.11601	0.946016	1.00677	1.25094	1.28546	1.22283	1.28748	1.02454	1.32834	0.991755	1.08103	1.16495	0.868496	1.26055	1.13096	1.06681	1.07917	0.950652	1.21149	0.933153	1.62513	1.11072	1.21606	1.05128	1.28683	0.997264	1.26581	1.18146
	14.2297	1.1455	1.12753	1.11241	1.21405	1.12683	1.24939	1.00479	1.0731	1.10259	1.17733	1.32067	1.15985	1.349	0.891856	1.17227	1.34079	1.1706	1.10918	0.848513	1.12324	1.10593	0.933026	0.981932	1.22773	1.26939	1.23799	1.29694	1.03811	1.29001	0.984399	1.07913	1.16882	0.866596	1.17649	1.17732	1.08615	1.08564	0.937918	1.23052	0.934531	1.5956	1.1119	1.26346	1.04694	1.29071	0.993658	1.21281	1.13252
	14.263	1.1289	1.07002	1.06393	1.23161	1.0963	1.22286	0.966811	1.07693	1.06844	1.17088	1.286	1.13439	1.35656	0.895131	1.12131	1.31353	1.17671	1.09703	0.82687	1.13173	1.06168	0.955713	0.951935	1.24317	1.29192	1.2163	1.2457	1.01626	1.31645	0.987206	1.05629	1.13904	0.83857	1.19719	1.12041	1.04804	1.04794	0.930829	1.21298	0.936106	1.59858	1.10523	1.23285	1.05724	1.24072	0.956363	1.22441	1.13031
	14.2964	1.12803	1.10032	1.07589	1.23197	1.1481	1.23266	0.998494	1.0877	1.10579	1.17565	1.30454	1.10123	1.34788	0.931443	1.09963	1.35604	1.19949	1.17918	0.821322	1.09513	1.13305	0.939216	0.951899	1.29475	1.27334	1.2409	1.28614	1.02838	1.31557	0.973266	1.04928	1.16736	0.850148	1.18043	1.1228	1.08567	1.05243	0.943394	1.22162	0.961268	1.63401	1.07417	1.24811	1.0224	1.25569	0.989969	1.22174	1.19822
	14.3297	1.11101	1.05896	1.03496	1.20127	1.13601	1.24937	0.987043	1.05891	1.07299	1.17595	1.31857	1.09033	1.34871	0.916648	1.11681	1.31943	1.1894	1.12775	0.819603	1.08315	1.08965	0.956068	0.979801	1.25861	1.28972	1.1974	1.26363	1.06392	1.29073	0.959487	1.05124	1.17824	0.833994	1.16626	1.14416	1.03225	1.03998	0.918887	1.1938	0.967209	1.59972	1.13712	1.22515	1.09338	1.27813	0.991082	1.22302	1.12932
	14.363	1.08706	1.07072	1.05937	1.2356	1.10332	1.241	0.976319	1.07493	1.08396	1.20608	1.30518	1.10675	1.37084	0.937585	1.12113	1.3279	1.19421	1.12296	0.791219	1.08376	1.09658	0.926578	0.960091	1.19935	1.27718	1.21361	1.28748	1.04323	1.29336	0.951463	1.05815	1.16056	0.829884	1.18704	1.13168	1.08406	1.07448	0.92611	1.20069	0.944041	1.63367	1.10363	1.22206	1.07692	1.27079	0.990321	1.24123	1.12235
	14.3964	1.09813	1.07815	1.06707	1.21948	1.09839	1.232	0.997761	1.07612	1.08632	1.20132	1.27143	1.10567	1.3514	0.940617	1.12867	1.32765	1.2114	1.14613	0.779032	1.09527	1.0297	0.925706	0.931708	1.2464	1.28092	1.24394	1.24863	1.03765	1.28095	0.936484	1.06953	1.22014	0.837705	1.16723	1.10673	1.0459	1.08266	0.901107	1.18826	0.957195	1.65722	1.0717	1.18675	1.07447	1.25471	1.00988	1.25926	1.12313
	14.4297	1.09953	1.07355	1.0616	1.21773	1.12164	1.23199	0.966803	1.07027	1.1416	1.21478	1.29543	1.09225	1.39204	0.927912	1.14134	1.35566	1.1685	1.13765	0.77906	1.09254	1.06276	0.90045	0.963792	1.23285	1.27666	1.20172	1.24004	1.06053	1.28093	0.950245	1.07313	1.17484	0.828064	1.20717	1.13488	1.05734	1.03851	0.892519	1.1983	0.965251	1.67254	1.11351	1.22346	1.09075	1.26718	1.00782	1.28799	1.15139
	14.463	1.10904	1.08693	1.02576	1.20474	1.11899	1.21093	1.00328	1.06361	1.10988	1.22212	1.2906	1.10077	1.41932	0.937858	1.10156	1.41394	1.18565	1.1209	0.766581	1.11401	1.06943	0.910367	0.947577	1.23403	1.29879	1.22547	1.27264	1.02841	1.25784	0.945921	1.0634	1.18739	0.815406	1.15769	1.11506	1.04075	1.06443	0.886935	1.16422	0.968722	1.63931	1.12097	1.2759	1.09278	1.30577	0.977137	1.2859	1.13705
	14.4963	1.08997	1.06069	1.02619	1.19591	1.08874	1.20347	0.964879	1.03363	1.09228	1.21982	1.26781	1.07929	1.41322	0.915761	1.10577	1.38675	1.14166	1.11734	0.753382	1.07826	1.0741	0.902253	0.938217	1.2467	1.29769	1.22312	1.26811	1.04637	1.2856	0.915773	1.05402	1.16884	0.840561	1.127	1.09296	1.05088	1.0503	0.897723	1.14669	0.952522	1.65129	1.0847	1.20018	1.07698	1.24666	1.00529	1.28007	1.17424
	14.5297	1.08568	1.04634	1.02793	1.21318	1.1048	1.19085	0.974858	1.05213	1.07726	1.18133	1.26613	1.0605	1.41983	0.937512	1.10216	1.35509	1.17094	1.09151	0.754238	1.08149	1.04453	0.897608	0.953495	1.2346	1.303	1.17552	1.26918	1.05227	1.25772	0.904271	1.0353	1.13422	0.817181	1.13914	1.10162	1.03215	1.07976	0.863483	1.14469	0.923375	1.6542	1.06936	1.24638	1.0337	1.23305	0.993252	1.2629	1.18655
	14.563	1.10017	1.07025	1.00487	1.21382	1.05837	1.16381	0.962077	1.03013	1.06823	1.16158	1.25732	1.04972	1.40101	0.944717	1.11979	1.25794	1.14621	1.09629	0.734928	1.08231	1.02495	0.886737	0.941383	1.19734	1.23764	1.19334	1.2669	1.03988	1.27063	0.909308	1.03659	1.12597	0.816056	1.16819	1.05367	1.01528	1.07651	0.896512	1.12299	0.93071	1.60124	1.08299	1.18043	1.05954	1.23841	1.00192	1.26306	1.20547
	14.5964	1.06607	1.04909	0.996581	1.1738	1.08163	1.22087	0.949274	1.01572	1.06233	1.17636	1.26122	1.04312	1.39407	0.915896	1.05295	1.28875	1.12316	1.14786	0.728833	1.07349	1.03709	0.916626	0.921394	1.1964	1.29904	1.2037	1.2329	1.04945	1.26613	0.893436	1.03074	1.12608	0.817943	1.16223	1.08362	1.0445	1.08102	0.865245	1.16691	0.910813	1.61688	1.06799	1.19513	1.04727	1.2361	1.00364	1.28621	1.18321
	14.6297	1.09248	1.08161	1.00331	1.18516	1.09135	1.21588	0.948765	1.04404	1.05944	1.17419	1.26995	1.05588	1.4016	0.901063	1.13156	1.25632	1.17202	1.09308	0.706263	1.10431	1.05541	0.890864	0.957758	1.17344	1.26238	1.17939	1.26012	1.03323	1.25284	0.899479	1.0329	1.14434	0.807259	1.17052	1.06904	1.05087	1.08927	0.842021	1.15254	0.919292	1.67584	1.08218	1.17101	1.11246	1.25651	0.975459	1.26744	1.24921
	14.663	1.04872	1.04796	1.0049	1.14914	1.04749	1.18067	0.912175	1.03367	1.08337	1.18477	1.23809	1.05277	1.39483	0.895741	1.05514	1.26437	1.12365	1.10916	0.712517	1.05028	1.00613	0.874491	0.88983	1.16149	1.24014	1.16538	1.21563	1.02694	1.25228	0.875567	1.03603	1.07927	0.789601	1.18489	1.05332	1.04004	1.05466	0.834616	1.1065	0.891182	1.58196	1.05571	1.16921	1.1063	1.23135	0.945199	1.26231	1.19854
	14.6964	1.06473	1.04417	0.972727	1.16363	1.03751	1.16701	0.945894	1.02974	1.05777	1.14634	1.26474	1.05358	1.43419	0.878344	1.09531	1.35192	1.14098	1.0954	0.694637	1.07887	1.02415	0.895361	0.909176	1.19158	1.2671	1.17086	1.21935	1.0353	1.25553	0.872223	1.02916	1.12689	0.773242	1.18436	1.07813	1.07546	1.05174	0.824977	1.12199	0.904394	1.63357	1.06893	1.17993	1.0322	1.21331	0.9427	1.25813	1.24712
	14.7297	1.05628	1.06118	0.999128	1.17205	1.07747	1.21196	0.942515	1.03626	1.08187	1.16125	1.25056	1.03825	1.41284	0.896648	1.11104	1.29476	1.15121	1.10929	0.700426	1.07379	1.06631	0.85758	0.928663	1.18176	1.23836	1.19673	1.26375	1.05053	1.25408	0.863592	1.03755	1.08111	0.787587	1.21849	1.06375	1.11004	1.03591	0.83587	1.13655	0.859031	1.56727	1.05399	1.20509	1.08795	1.23635	0.933623	1.22574	1.22754
	14.763	1.03357	1.03689	0.968599	1.13192	1.09415	1.1737	0.909605	1.0416	1.06824	1.16459	1.23406	1.03997	1.39497	0.909718	1.06647	1.27315	1.13503	1.12981	0.68836	1.07245	1.00638	0.850344	0.8962	1.1822	1.28336	1.14982	1.26034	1.03515	1.26078	0.859072	1.01206	1.11486	0.768658	1.26529	1.104	1.07153	1.03027	0.815186	1.12062	0.883952	1.5687	1.08318	1.22256	1.10552	1.21334	0.94297	1.24657	1.21562
	14.7964	1.06337	1.0408	0.980234	1.16399	1.06496	1.2139	0.915154	1.01389	1.07259	1.17235	1.24885	1.03086	1.40755	0.918393	1.08138	1.28294	1.14523	1.10025	0.68759	1.08525	1.00024	0.840091	0.890047	1.17521	1.27387	1.20924	1.28395	1.03089	1.23898	0.83341	1.0238	1.09025	0.777256	1.23901	1.1165	1.09098	1.11454	0.825329	1.12709	0.877276	1.62142	1.07411	1.18626	1.06385	1.20476	0.923747	1.224	1.19676
	14.8297	1.04852	1.05738	0.977786	1.12649	1.05824	1.21129	0.906717	1.02703	1.05726	1.19461	1.24576	1.03705	1.42657	0.889531	1.09779	1.28706	1.12384	1.09173	0.679584	1.05411	1.03527	0.868683	0.87013	1.17727	1.27765	1.19962	1.25216	1.05814	1.25774	0.825626	1.02917	1.08962	0.786877	1.2644	1.11084	1.10435	1.11227	0.817481	1.12289	0.853536	1.61922	1.04747	1.16691	1.02655	1.19108	0.915116	1.19838	1.22665
	14.863	1.03559	1.03647	0.941855	1.14572	1.06012	1.2224	0.914322	1.0173	1.03627	1.12829	1.23564	1.02647	1.39661	0.910881	1.07319	1.27809	1.13533	1.07913	0.680561	1.06159	1.01374	0.826075	0.889763	1.13954	1.28169	1.21625	1.26009	1.03057	1.23304	0.812096	1.0207	1.074	0.747804	1.23399	1.11572	1.08197	1.09754	0.82832	1.1232	0.874516	1.62021	1.05186	1.14331	1.09017	1.22489	0.929913	1.22324	1.25726
	14.8963	1.05463	1.04993	0.972915	1.13084	1.05292	1.19959	0.885502	1.02073	1.03983	1.17596	1.27606	1.02595	1.39613	0.906725	1.10624	1.2754	1.14049	1.0789	0.673377	1.04706	1.02219	0.854478	0.878638	1.18936	1.30136	1.21485	1.26474	1.05289	1.22208	0.808405	1.04093	1.10682	0.768634	1.19558	1.124	1.08916	1.09468	0.800999	1.12487	0.864143	1.59192	1.0378	1.15162	1.0449	1.22004	0.901783	1.22783	1.26761
	14.9297	1.03691	1.03518	0.969484	1.16897	1.05241	1.19352	0.899498	1.01371	1.02537	1.15326	1.23188	1.01781	1.40954	0.891457	1.03985	1.23807	1.05671	1.08792	0.661534	1.02983	0.957101	0.859717	0.87457	1.15881	1.24704	1.19322	1.24125	1.04866	1.23804	0.776381	1.02488	1.06469	0.778326	1.23984	1.11992	1.10911	1.11875	0.785949	1.10307	0.867307	1.56679	1.0483	1.15361	1.02259	1.22594	0.877347	1.20988	1.24346
	14.963	1.07538	1.03072	0.968868	1.17211	1.07413	1.18911	0.909838	1.00908	1.05367	1.16896	1.26269	1.00896	1.442	0.924076	1.10994	1.28806	1.14849	1.09454	0.681121	1.0412	1.02345	0.821864	0.896577	1.14397	1.28794	1.22358	1.26688	1.03667	1.22839	0.769711	1.01735	1.08217	0.773078	1.22675	1.14897	1.11309	1.08971	0.790942	1.0943	0.876808	1.61634	1.03835	1.17505	1.09006	1.23755	0.876623	1.24224	1.23182
	14.9963	1.04433	1.04463	0.939879	1.14495	1.04741	1.16392	0.877583	1.00915	1.03827	1.14176	1.22738	0.983673	1.38915	0.917052	1.04266	1.27455	1.12876	1.07682	0.660352	1.03183	1.03304	0.854389	0.885684	1.17104	1.24982	1.15752	1.24941	1.03051	1.21471	0.754539	1.00655	1.09984	0.779243	1.23308	1.11543	1.08157	1.06187	0.770638	1.10942	0.870111	1.55631	1.07276	1.19003	1.10203	1.19873	0.869143	1.20719	1.2773
Figure 2F
	WT A20	Orai1 KO #4	Orai3 KO #2	O1/O3 KO #7
	1.02753	0.575486	0.792987	0.178452
	0.946854	0.229379	0.836465	0.090112
	0.968035	0.234296	0.727256	0.104034
	1.02687	0.498002	0.870279	0.117659
	1.02301	0.899975	0.834441	0.130268
	1.001	0.43686	0.613832	0.077148
	0.975839	0.22468	0.626061	0.10341
	0.996015	0.25128	0.986078	0.099236
	0.974073	0.612392	0.731442	0.098965
	0.977222	0.151904	0.656352	0.120464
	0.880152	0.293254	0.923999	0.046746
	1.23482	0.419507	0.808955	0.128319
	1.0364	0.328098	0.851736	0.070191
	0.965594	0.271316	0.943223	0.128381
	1.05112	0.191915	0.68522	0.094621
	1.15185	0.151921	0.724832	0.05262
	0.946034	0.175719	0.760734	0.054165
	0.821051	0.391256	0.646051	0.057835
	1.10924	0.702919	0.918476	0.08341
	0.976807	0.622305	0.645918	0.08593
	0.995922	0.957103	0.805898	0.14776
	0.925587	0.376116	0.986602	0.108179
	0.892198	0.188236	0.797528	0.135492
	1.04996	0.524692	0.898793	0.063304
	1.00472	0.597904	0.606349	0.072933
	1.02922	0.220945	0.56876	0.057282
	0.999464	0.63383	0.668744	0.077994
	0.979459	0.736044	0.658879	0.092408
	0.976827	0.229584	0.772212	0.058371
	0.953347	0.477151	0.689803	0.038979
	0.905625	0.33022	0.91094	0.073127
	1.02293	0.178817	0.608495	0.117237
	0.839072	0.494784	0.569508	0.10453
	1.02832	0.193918	0.673727	0.080179
	1.01259	0.307869	0.766971	0.173232
	0.803277	0.153373	0.851293	0.04904
	1.0114	0.417511	0.714003	0.060103
	1.04649	0.523216	0.785516	0.088127
	1.31561	0.420135	0.535718	0.105955
	0.932381	0.185303	0.761909	0.118991
	1.32065	0.60537	0.700499	0.079944
	0.940078	0.249969	0.834812	0.083585
	1.14193	0.847309	0.709698	0.105052
	0.927821	0.188956	0.639625	0.095132
	0.962717	0.384325	0.608578	0.083775
	0.986837	0.580811	0.724349	0.170932
	1.13794	0.240743	0.71084	0.083339
	1.05733	0.709645	0.886897	0.071769
	0.743217	0.992219	0.740557	0.062173
	0.968181	0.445033	0.817977	0.111814
	1.13473	0.226768	0.470538	0.054328
	0.974153	0.340475	0.621218	0.097229
	1.07411	0.128719	0.684669	0.075845
	0.961148	0.273461	0.585832	0.109514
	1.22799	0.215211	0.521454	0.053412
	1.20479	0.097791	0.710541	0.08841
	1.07259	0.568698	0.638138	0.05627
	1.12133	0.462114	0.885338	0.097743
	0.905807	0.159128	0.63839	0.062686
	0.885732	1.01466	0.827677	0.093604
	0.968194	0.327609	0.755777	0.067479
	0.820634	0.367098	0.682361	0.08386
	1.0815	0.499434	0.481216	0.181161
	1.17273	0.275331	0.767999	0.052062
	0.83001	0.457622	0.748634	0.131826
	0.946524	0.086738	0.883475	0.030947
	1.04448	0.120446	0.630456	0.04801
	1.08557	0.5313	0.567925	0.212712
	0.95572	0.274447	0.68316	0.100037
	1.08102	0.956245	0.643622	0.107654
	0.909107	0.140948	0.828933	0.06991
	1.36876	0.572967	0.818029	0.106116
	1.08324	0.198541	0.858295	0.149486
	1.13834	0.289659	0.807458	0.165797
	0.856985	0.368896	0.725059	0.15536
	0.959419	0.188939	0.774141	0.116729
	0.955315	0.572071	0.81298	0.048835
	0.94841	0.149595	0.868664	0.064634
	0.908808	0.258432	0.586033	0.083055
	0.893055	0.526528	0.608358	0.074679
	1.38206	0.341024	0.57232	0.120179
	1.04799	0.467453	0.56739	0.072024
	0.980467	0.564721	0.729914	0.078608
	0.970699	0.392811	0.792741	0.121975
	0.848307	0.367738	0.315836	0.099267
	1.09238	0.144567	0.834034	0.050894
	0.856409	0.362782	0.743952	0.072592
	1.27773	0.166642	0.616746	0.038236
	0.926779	0.179481	0.632996	0.106187
	1.08359	0.22314		0.051764
	0.953517	0.44522		0.064682
	0.846535	0.427212		0.117158
	1.13851	0.168809		0.064955
	0.924937	0.512641		0.092805
	1.05246	0.147249		0.042249
	1.00515	0.156996		0.038214
	1.13764	0.413881		0.036518
	0.817732	0.457534		0.097551
	1.109	0.808964
		0.352399
Figure 2G
	Time (sec)
	0	0.54673	0.492414	0.557	0.457666	0.434699
	1.777	0.535593	0.482483	0.552846	0.443269	0.410539
	3.775	0.583939	0.480714	0.548836	0.44992	0.442358
	5.777	0.534758	0.482344	0.575236	0.449322	0.424259
	7.78	0.541293	0.490372	0.558937	0.456997	0.431886
	9.781	0.553741	0.469403	0.569012	0.435563	0.423163
	11.778	0.522582	0.494155	0.568683	0.447765	0.426079
	13.776	0.535746	0.474581	0.548178	0.432276	0.430934
	15.779	0.569439	0.496536	0.570329	0.444213	0.416618
	17.777	0.552562	0.481206	0.584063	0.456419	0.431411
	19.779	0.502723	0.464776	0.595617	0.455887	0.434387
	21.777	0.526898	0.481532	0.591536	0.457158	0.430964
	23.778	0.531037	0.480124	0.590497	0.453911	0.423888
	25.777	0.548081	0.482063	0.583036	0.463735	0.430435
	27.779	0.518483	0.477171	0.608658	0.440595	0.410357
	29.777	0.520197	0.447506	0.608274	0.469059	0.417139
	31.777	0.503296	0.4438	0.59088	0.462675	0.422823
	33.777	0.496222	0.451135	0.540091	0.457376	0.416411
	35.775	0.54511	0.451064	0.562068	0.464976	0.436698
	37.774	0.519745	0.452685	0.573814	0.455141	0.430366
	39.774	0.520389	0.442976	0.588645	0.451103	0.429181
	41.778	0.528095	0.442073	0.567863	0.46414	0.428385
	43.775	0.556062	0.448399	0.568681	0.4535	0.431043
	45.773	0.526443	0.45459	0.577773	0.473733	0.438353
	47.778	0.501484	0.421106	0.567434	0.469093	0.413645
	49.777	0.531576	0.470858	0.60354	0.442521	0.418644
	51.778	0.537695	0.461013	0.575805	0.450132	0.421407
	53.778	0.51027	0.453798	0.586904	0.46894	0.442733
	55.776	0.562137	0.445896	0.5452	0.434337	0.41589
	57.776	0.550967	0.425827	0.531194	0.444469	0.411738
	59.777	0.558162	0.455571	0.518926	0.460557	0.424449
	61.774	0.592817	0.450674	0.560025	0.461425	0.428871
	63.777	0.602976	0.461803	0.557243	0.471192	0.442714
	65.774	0.562415	0.446627	0.571552	0.466302	0.429697
	67.778	0.588202	0.477306	0.558809	0.478641	0.433872
	69.778	0.584755	0.462445	0.584497	0.461106	0.425371
	71.775	0.592321	0.457664	0.574207	0.486778	0.461651
	73.775	0.575888	0.459951	0.589095	0.467352	0.443124
	75.778	0.55978	0.454782	0.561571	0.451405	0.442161
	77.775	0.560108	0.463675	0.580577	0.454871	0.441374
	79.773	0.547956	0.471641	0.588026	0.498367	0.434471
	81.774	0.553935	0.448801	0.583112	0.465245	0.435368
	83.775	0.562994	0.465203	0.608326	0.462204	0.425884
	85.777	0.583935	0.614267	1.00207	0.468311	0.43917
	87.776	0.568284	1.53383	1.26884	0.474672	0.458662
	89.776	0.619863	1.36521	1.17579	0.48417	0.630865
	91.777	0.59227	1.1312	1.02505	0.459829	1.29935
	93.777	0.606246	1.09192	0.933556	0.472233	1.25856
	95.778	0.59538	1.33569	1.02661	0.505636	1.16498
	97.775	0.605033	1.42292	1.09523	0.483397	1.12208
	99.776	0.591381	1.40343	1.11214	0.513965	1.14867
	101.777	0.654135	1.36662	1.02182	0.525315	1.20479
	103.776	0.661668	1.20044	1.07271	1.47799	1.10176
	105.774	0.685172	1.29919	1.17524	1.35726	1.20206
	107.773	0.763085	1.26349	1.10283	1.03456	1.16925
	109.776	1.16075	1.57534	1.08711	0.899124	1.29833
	111.775	0.971707	1.48951	1.08859	1.25817	1.35038
	113.774	0.768168	1.38901	1.22776	1.36323	1.30181
	115.774	0.71541	1.17768	1.24176	1.19357	1.22542
	117.776	0.725191	1.13634	1.27854	1.13749	1.22401
	119.775	0.709176	0.972966	1.18539	1.43673	1.19603
	121.775	0.695177	1.13861	1.23388	1.44738	1.23256
	123.775	0.70386	1.19551	1.22157	1.368	1.22082
	125.776	1.08724	1.03982	1.18849	1.36774	1.23205
	127.776	1.11095	0.868624	1.20129	1.27453	1.33145
	129.778	0.913268	1.11835	1.28611	1.24344	1.3418
	131.775	0.836119	1.22436	1.28481	1.41566	1.20846
	133.778	0.784943	1.0586	1.20242	1.36549	1.1085
	135.775	1.08035	0.990658	1.20168	1.10553	1.18941
	137.777	0.871452	1.02939	1.17058	1.08967	1.2173
	139.776	0.791655	0.970134	1.16727	1.4226	1.31319
	141.776	0.724431	1.02023	1.16069	1.43139	1.35401
	143.779	0.644119	1.06871	1.22453	1.01649	1.2272
	145.777	0.586323	0.957105	1.23148	0.795645	1.12618
	147.774	0.649186	0.850933	1.21274	1.57483	1.07549
	149.778	0.624588	0.930016	1.28028	1.41559	1.2321
	151.78	0.778433	0.894569	1.3476	0.973465	1.24864
	153.779	1.30871	0.835	1.09839	0.703713	1.10106
	155.778	1.141	0.922158	1.06043	0.628492	1.07229
	157.776	0.870494	1.04056	1.21045	1.02667	0.999552
	159.773	0.80649	0.97308	1.19362	1.70132	1.08187
	161.774	0.974776	0.831066	1.016	1.35106	1.18077
	163.775	1.04476	0.810672	1.06633	1.00365	1.16774
	165.777	0.790248	0.857291	1.04423	0.836392	1.04384
	167.774	0.796914	0.826601	0.955156	1.13191	0.928109
	169.776	1.0755	0.784859	1.07119	1.33324	0.883047
	171.777	1.13209	0.943938	1.13089	0.920574	0.985557
	173.774	0.836005	1.03239	1.0743	0.730161	1.22751
	175.776	0.686483	0.826741	0.98171	0.623198	1.15746
	177.776	0.622445	0.72396	1.04764	0.652263	1.09765
	179.773	0.647229	0.647975	0.965799	0.641903	1.00449
	181.775	0.673329	0.676239	0.888653	1.29808	0.950784
	183.777	0.635093	0.724946	1.0531	1.52385	1.0238
	185.774	0.653583	0.976818	0.975329	1.14248	1.11413
	187.773	0.653786	0.948517	0.824236	0.761523	1.09349
	189.775	0.625328	0.890834	0.88581	0.674897	1.10735
	191.773	0.622529	0.696447	0.832619	0.61735	1.06313
	193.775	1.28055	0.846195	0.85215	0.617679	1.05188
	195.774	1.28689	0.971958	0.876398	0.782845	0.992151
	197.777	0.917401	1.00931	1.1273	1.51966	0.956229
	199.778	0.700017	0.901038	0.922933	1.20906	1.07676
	201.778	0.627659	0.956014	0.759515	0.813588	1.08116
	203.775	0.636275	1.00693	0.738416	0.655129	0.949159
	205.775	0.640448	0.907809	0.916006	0.621944	0.81458
	207.778	0.636229	0.871564	1.07004	0.60279	0.875141
	209.775	0.621317	0.897327	0.910263	0.611458	0.87344
	211.774	0.610368	0.917802	0.757311	0.622442	0.962832
	213.775	0.640242	0.739495	0.656607	0.640504	0.861306
	215.774	0.6085	0.702826	0.727106	0.6215	0.778385
	217.775	0.595112	1.03001	0.786105	0.804974	0.954102
	219.775	0.613182	1.12192	1.04793	1.54324	1.04137
	221.773	0.594858	0.922479	0.927936	1.29136	0.947443
	223.776	0.67845	0.739054	0.75336	0.849623	0.892199
	225.78	1.31046	0.683879	0.647278	0.65789	0.968127
	227.776	1.3028	0.678171	0.714935	0.623358	1.08457
	229.778	0.796735	0.841867	0.992082	0.600185	1.02324
	231.777	0.686314	0.837775	0.984821	0.582303	0.825091
	233.778	0.633335	0.687192	0.804799	0.604621	0.790833
	235.778	0.634179	0.697639	0.646036	0.602682	0.954473
	237.775	0.627565	0.639032	0.628728	0.582834	1.00142
	239.775	0.560164	0.623297	0.627992	0.577605	0.821663
	241.774	0.702411	0.665976	0.71298	0.581438	0.64731
	243.777	0.79293	0.753088	0.975412	0.617112	0.595325
	245.773	1.29372	1.14044	0.995436	0.592233	0.565299
	247.775	0.976379	1.02934	0.736082	0.612995	0.614131
	249.776	0.676489	0.775095	0.68925	0.635421	1.02975
	251.773	0.610235	0.652272	0.674364	0.651295	1.22515
	253.777	0.576031	0.912693	0.678384	0.785962	1.04244
	255.774	0.591566	1.2239	0.694163	1.3006	0.794146
	257.778	0.587815	0.947174	0.777701	1.2488	0.658227
	259.777	0.616079	0.735577	0.767153	0.842125	0.612815
	261.774	0.628221	0.826447	0.898057	0.658513	0.612614
	263.776	0.618557	0.982974	0.746695	0.60005	0.58651
	265.777	0.591597	0.881171	0.664364	0.572165	0.61552
	267.775	0.61044	0.78893	0.620808	0.567134	0.959745
	269.777	0.700955	0.712972	0.612795	0.583191	1.22171
	271.775	1.40903	0.906716	0.643496	0.565009	1.05104
	273.78	0.998466	0.830407	0.621758	0.573329	0.824318
	275.777	0.662997	0.835859	0.569086	0.579881	0.703871
	277.775	0.647575	0.851225	0.616271	0.614965	0.623854
	279.78	0.590779	0.84934	0.679268	0.580187	0.596596
	281.777	0.586258	1.23776	0.961949	0.58201	0.619423
	283.775	0.598425	0.994388	0.94418	0.556973	0.60619
	285.778	0.658597	0.737448	0.758594	0.580884	0.888665
	287.774	0.736436	0.639097	0.722953	0.562699	1.11447
	289.775	1.33497	1.01396	0.688922	0.596512	0.910679
	291.777	0.936612	1.218	0.738721	0.570814	0.6903
	293.778	0.654375	0.957755	1.01444	0.583538	0.613841
	295.773	0.564691	0.795935	0.902593	0.570867	0.57912
	297.774	0.581997	0.894455	0.699249	0.588222	0.619797
	299.778	0.572501	1.21934	0.608818	0.569371	0.767703
	301.776	0.554576	1.0201	0.609838	0.596439	1.10171
	303.774	0.568405	0.801797	0.70021	0.599027	0.947644
	305.776	0.599024	0.960407	0.937956	0.612286	0.817307
	307.776	1.4838	1.07415	0.902356	0.589878	0.709375
	309.777	1.12967	0.892198	0.772829	0.694026	0.671303
	311.776	0.755748	0.715595	0.655051	0.764937	0.999941
	313.776	0.660911	0.837716	0.660416	1.47976	1.12496
	315.776	0.728403	1.11738	0.678457	1.25823	0.893255
	317.774	1.29482	0.916433	1.0617	0.880618	0.723437
	319.775	0.789352	0.708385	1.0024	0.638791	0.611602
	321.775	0.617394	0.732533	0.778888	0.625332	0.633239
	323.775	0.604596	1.18708	0.656924	0.611689	0.7835
	325.775	0.560136	1.14991	0.623965	0.60466	1.08448
	327.776	0.561702	0.764752	0.612453	0.627396	1.04585
	329.775	0.594934	0.656201	0.677506	0.637376	0.809399
	331.773	0.610744	0.634302	1.05146	0.71785	0.607188
	333.778	1.3479	0.958	0.959908	1.20719	0.56449
	335.774	1.12173	1.29206	0.725408	1.26677	0.558841
	337.776	0.710433	1.05646	0.603999	0.96914	0.539873
	339.775	0.644579	0.874953	0.650977	0.805238	0.617604
	341.777	0.577373	0.866323	0.605453	0.673337	1.11854
	343.776	0.618386	0.814147	0.588544	0.662334	1.02279
	345.775	1.24055	1.15808	0.587186	0.60336	0.808992
	347.774	1.02318	1.07409	0.56817	0.612742	0.684412
	349.777	0.727977	0.765612	0.576178	0.5847	0.606475
	351.774	1.09934	0.676679	0.582303	0.60969	0.658197
	353.776	1.16752	0.739861	0.624325	0.89981	0.968307
	355.775	0.640584	1.26946	1.04186	1.45433	1.0573
	357.778	0.543601	1.0016	0.9867	1.12484	0.926079
	359.775	0.569821	0.779908	0.721157	0.767816	0.713965
	361.777	0.617549	0.757441	0.665583	0.611548	0.653955
	363.778	0.825648	1.17099	0.635731	0.596963	0.70753
	365.773	1.32058	1.07181	0.635925	0.593402	1.02805
	367.773	0.747889	0.740389	0.743443	0.655974	0.955464
	369.779	0.580341	0.624734	0.938316	0.658531	0.79384
	371.78	0.578513	0.660449	0.8865	0.700509	0.655768
	373.775	0.558192	1.14069	0.748693	0.976058	0.761789
	375.778	0.584329	1.11982	0.671725	1.4339	0.953941
	377.774	1.29982	0.836749	0.753278	1.14175	0.830768
	379.775	0.95451	0.650457	0.762434	0.734051	0.612476
	381.775	0.59713	0.69352	0.863158	0.631293	0.531189
	383.777	0.526987	1.17098	0.757612	0.60326	0.533823
	385.774	0.565612	1.04088	0.648511	0.627677	0.566144
	387.779	0.564751	0.745644	0.611924	0.615487	0.558963
	389.777	0.528711	0.658172	0.782814	0.597899	0.593991
	391.776	0.540812	0.998604	0.923427	0.630561	0.669293
	393.777	0.712474	1.09363	0.766402	0.659637	1.04863
	395.779	1.36121	0.821447	0.634778	1.04468	1.00536
	397.779	0.798557	0.717175	0.602663	1.33421	0.767
	399.775	0.560961	1.13488	0.629011	1.04426	0.625847
	401.778	0.572085	1.20097	0.736835	0.71623	0.553463
	403.776	0.564565	0.877977	0.994197	0.626237	0.598583
	405.778	0.54577	0.671761	0.798479	0.656444	0.902307
	407.776	0.734611	0.64729	0.600691	0.612319	1.08913
	409.773	1.26371	0.774392	0.582937	0.627968	0.886481
	411.776	0.82636	1.27143	0.580754	0.613206	0.689737
	413.776	0.573915	0.954696	0.62409	0.628831	0.607167
	415.777	0.568181	0.683108	0.766108	0.616648	0.613064
	417.773	0.551438	0.636415	0.985223	0.600488	0.698884
	419.777	0.615165	1.02389	0.773999	0.621523	1.00129
	421.777	1.35828	1.15497	0.643315	0.730601	0.899831
	423.779	0.854306	0.83217	0.581268	1.19567	0.696006
	425.774	0.623794	0.664065	0.566799	1.38105	0.556525
	427.775	0.596467	0.672533	0.559407	1.03201	0.542864
	429.773	0.572999	0.877815	0.568413	0.703107	0.558968
	431.777	0.600879	1.21442	0.581549	0.584226	0.572564
	433.777	1.35935	1.05895	0.561633	0.594562	0.527899
	435.777	0.897091	0.790879	0.617354	0.608347	0.628428
	437.778	0.615586	0.724642	1.03381	0.581289	1.1079
	439.777	0.542723	1.11675	0.981411	0.589667	1.04141
	441.779	0.846389	0.934904	0.70078	0.616871	0.843886
	443.777	1.03235	0.79046	0.614569	0.633746	0.66832
	445.778	0.601082	0.659722	0.573536	0.816621	0.587089
	447.772	0.548214	0.890626	0.594144	1.36903	0.601764
	449.775	0.598786	1.14306	0.646221	1.0169	0.644275
	451.774	1.25287	0.978701	0.958357	0.673091	1.03482
	453.777	0.972789	0.754891	0.912109	0.591273	1.15272
	455.775	0.632563	0.673171	0.721495	0.559369	1.03046
	457.776	0.557957	1.09055	0.621959	0.576833	0.906149
	459.777	0.67027	1.11546	0.578359	0.593332	0.798631
	461.776	1.10243	0.902217	0.589952	0.58451	0.686115
	463.776	0.772133	0.719552	0.574892	0.565005	0.568337
	465.775	0.559646	0.691746	0.572867	0.579121	0.566725
	467.775	0.588898	0.641999	0.581407	0.596442	0.572856
	469.774	1.16613	0.954305	0.572755	0.609754	0.641165
	471.778	0.932285	1.1456	0.690091	0.621602	1.01905
	473.778	0.666444	1.0363	1.04533	0.662984	0.994525
	475.775	0.718681	0.713903	0.880345	1.18764	0.775698
	477.777	1.0161	0.681241	0.677619	1.37555	0.611896
	479.776	0.682687	0.984573	0.596925	0.896508	0.549166
	481.773	0.602582	0.95138	0.551969	0.655349	0.594997
	483.779	0.69461	0.693182	0.573864	0.602399	0.559645
	485.774	1.17867	0.628753	0.589782	0.60285	0.555981
	487.775	0.798801	0.67223	0.988724	0.581165	0.749292
	489.773	0.585643	0.956933	1.00646	0.599849	1.03722
	491.778	0.586088	0.917137	0.714597	0.636947	0.901552
	493.774	0.73292	0.850106	0.603386	0.692379	0.734989
	495.774	1.12119	0.72907	0.592202	1.43491	0.650061
	497.774	0.794781	0.791934	0.589646	1.28573	0.580106
	499.778	0.578676	1.05341	0.624457	0.87783	0.638224
	501.775	0.682205	0.89906	0.64494	0.639274	0.790646
	503.774	0.912445	0.822914	0.991515	0.633217	0.990508
	505.774	0.732586	0.771355	0.867856	0.595352	0.875152
	507.773	0.619876	0.91994	0.695439	0.588473	0.761815
	509.773	0.59825	0.793787	0.623581	0.586351	0.704759
	511.776	0.589872	0.7018	0.613072	0.595874	0.664685
	513.779	0.680736	1.02295	0.59257	0.587512	0.683238
	515.773	1.08028	1.06104	0.599436	0.607796	0.904061
	517.774	0.665131	0.773125	0.590918	0.68027	1.01234
	519.774	0.570434	0.619815	0.637371	1.21437	0.835172
	521.773	0.6413	0.586317	0.635579	1.29441	0.663136
	523.774	1.23479	0.961034	0.648791	0.967296	0.583898
	525.775	0.721294	1.04769	0.69102	0.680874	0.568724
	527.774	0.546275	0.969478	0.954358	0.624268	0.557075
	529.776	0.542947	0.777982	0.933874	0.599844	0.530473
	531.774	0.571672	0.657136	0.736751	0.606324	0.560307
	533.776	1.19171	0.820913	0.61509	0.618021	0.666067
	535.777	1.01397	1.16964	0.616715	0.604203	1.08959
	537.777	0.611035	1.0688	0.589848	0.587077	1.00526
	539.777	0.515007	0.926281	0.607016	0.592513	0.777718
	541.775	0.565823	0.813117	0.565774	0.577657	0.602588
	543.777	0.492721	0.835345	0.603372	0.618707	0.57088
	545.773	0.697219	1.0639	0.621409	0.762598	0.548506
	547.777	1.35056	0.91213	0.625603	1.35879	0.603203
	549.777	0.808351	0.709421	1.09787	1.21843	0.786883
	551.773	0.581033	0.644805	0.96628	0.79193	1.02272
	553.774	0.575856	0.65183	0.757249	0.629843	0.857342
	555.774	0.621859	0.709854	0.613295	0.576607	0.688538
	557.776	1.17208	1.1192	0.610234	0.606329	0.636086
	559.775	0.738506	0.958641	0.602061	0.596023	0.656775
	561.774	0.565135	0.730144	0.61423	0.758709	0.968307
	563.774	0.568966	0.699035	0.678199	1.12742	0.949338
	565.775	0.557708	0.990595	1.06873	1.20076	0.76205
	567.776	0.608564	1.11708	0.911161	0.864991	0.598449
	569.775	1.25975	0.831748	0.780227	0.68559	0.563874
	571.776	0.933864	0.733419	0.638337	0.617119	0.551339
	573.777	0.551086	0.724356	0.58621	0.593052	0.551469
	575.778	0.567875	1.08954	0.633282	0.597279	0.607428
	577.775	0.623179	1.04864	0.678758	0.596004	0.625155
	579.773	1.29124	0.881873	0.878645	0.643511	0.817234
	581.773	0.956075	0.670174	0.874507	1.29367	1.00663
	583.774	0.636264	0.821511	0.706023	1.21237	0.869503
	585.773	0.725937	1.06627	0.597135	0.769618	0.667894
	587.774	1.18125	0.979003	0.612936	0.654953	0.592554
	589.774	0.739512	0.767585	0.638305	0.610321	0.55535
	591.774	0.601793	0.692265	0.6186	0.712925	0.539234
	593.778	0.597721	0.762779	0.905471	1.35499	0.614175
	595.775	0.823645	1.11307	0.91605	1.23199	1.04404
	597.779	1.27949	1.19112	0.7201	0.824057	1.06113
	599.775	0.804791	1.09702	0.618298	0.636517	0.77646
Figure 2H
	Time (sec)
	0	0.587865	0.948696	0.412132	0.39909	0.497955
	1.777	0.522232	0.769718	0.404967	0.411421	0.492695
	3.776	0.480317	0.608563	0.410111	0.415293	0.520483
	5.777	0.459155	0.517537	0.392795	0.427605	0.496514
	7.777	0.457122	0.45524	0.415101	0.411682	0.505446
	9.78	0.466839	0.440962	0.417701	0.399146	0.489227
	11.78	0.436423	0.41157	0.414798	0.400742	0.495426
	13.78	0.45491	0.420537	0.417106	0.401084	0.508965
	15.777	0.443016	0.417518	0.409821	0.418816	0.495225
	17.777	0.438481	0.408199	0.411524	0.412494	0.510141
	19.778	0.454405	0.393879	0.419972	0.412933	0.511016
	21.778	0.427214	0.413337	0.403558	0.406827	0.508243
	23.78	0.437191	0.394698	0.41292	0.396568	0.489959
	25.78	0.430925	0.407798	0.427854	0.42497	0.501412
	27.782	0.440772	0.407928	0.43452	0.414365	0.504104
	29.777	0.443787	0.405346	0.460384	0.434628	0.503659
	31.778	0.437348	0.404869	0.42408	0.429455	0.513996
	33.78	0.436765	0.436836	0.431804	0.405048	0.531501
	35.78	0.44482	0.419983	0.438146	0.411652	0.488917
	37.777	0.442874	0.414348	0.429293	0.407694	0.498916
	39.775	0.441012	0.415549	0.423412	0.40545	0.515396
	41.775	0.441123	0.434617	0.428359	0.400515	0.506561
	43.779	0.435297	0.434219	0.443894	0.412455	0.503588
	45.781	0.438184	0.414285	0.4139	0.404115	0.505213
	47.778	0.427978	0.400918	0.429646	0.401005	0.499204
	49.776	0.424335	0.41285	0.42059	0.41371	0.529773
	51.778	0.419835	0.393128	0.400934	0.369842	0.501406
	53.779	0.429292	0.397392	0.411667	0.412803	0.493157
	55.778	0.438933	0.393355	0.404981	0.365542	0.483505
	57.778	0.43357	0.406786	0.399251	0.403687	0.495297
	59.776	0.410194	0.349621	0.34813	0.401465	0.473155
	61.78	0.41586	0.398348	0.42183	0.400856	0.470501
	63.782	0.419269	0.387914	0.413589	0.385152	0.485215
	65.78	0.414231	0.390029	0.411484	0.404532	0.488556
	67.777	0.404735	0.400844	0.422467	0.396671	0.480122
	69.777	0.429124	0.392348	0.412715	0.395341	0.498243
	71.78	0.422951	0.396621	0.427931	0.4003	0.487279
	73.777	0.413899	0.415421	0.428804	0.421525	0.487146
	75.778	0.408388	0.432031	0.448764	0.369489	0.490214
	77.774	0.44828	0.42986	0.424122	0.352672	0.482257
	79.779	0.430839	0.4811	0.438841	0.369611	0.490988
	81.775	0.428362	0.790118	0.42876	0.359458	0.516488
	83.778	0.431914	1.1796	0.444286	0.378396	0.517384
	85.778	0.435998	1.01731	0.41473	0.442406	0.537487
	87.776	0.458256	0.874938	0.44802	0.391393	0.63177
	89.778	0.513988	0.712636	0.425096	0.435476	1.41711
	91.778	1.25443	0.596568	0.417044	0.494637	1.32585
	93.776	1.40874	0.5264	0.424575	1.15036	1.16956
	95.777	1.24925	0.473612	0.436253	1.17825	1.01646
	97.78	0.976801	0.458425	0.43454	0.89328	0.97088
	99.78	0.856823	0.44216	0.46889	0.837334	1.03261
	101.778	0.822266	0.427921	0.507293	0.81467	0.954563
	103.779	1.1857	0.436704	1.07332	0.874271	0.899695
	105.776	1.39011	0.461427	1.38298	0.9544	1.17794
	107.778	1.22253	0.436108	1.13815	0.954311	1.22473
	109.778	1.05599	0.444945	0.933832	0.781737	1.09318
	111.78	1.18603	0.495501	0.731738	0.665487	0.888324
	113.777	1.22356	0.581224	0.704479	0.697361	1.12441
	115.78	1.19975	1.37393	0.702184	0.903398	1.61385
	117.779	1.09502	1.28186	0.750994	1.02936	1.4189
	119.779	1.03811	1.08595	1.02814	0.789966	1.03879
	121.777	0.991786	0.842344	0.8902	0.624554	0.765228
	123.777	1.32353	0.713438	0.694549	0.526132	0.691637
	125.777	1.26646	0.756077	0.602697	0.483322	0.753991
	127.777	1.06138	0.860131	0.576498	0.472895	1.19141
	129.778	0.895004	0.842281	0.547627	0.428939	1.15057
	131.777	0.913159	0.797188	0.537795	0.443171	0.831767
	133.777	0.793062	0.703456	0.507267	0.433663	0.673247
	135.779	0.628856	0.66633	0.519769	0.443858	0.583136
	137.777	0.566576	0.710677	0.511315	0.486801	0.553285
	139.777	0.503918	0.811712	0.486137	0.5187	0.549882
	141.776	0.469087	0.747047	0.452097	0.740014	0.550363
	143.776	0.479308	0.647509	0.489623	1.27388	0.558448
	145.778	0.471491	0.5499	0.552036	1.09581	0.552504
	147.776	0.475172	0.494402	1.21091	0.865557	0.552433
	149.779	0.484567	0.511548	1.1094	0.617422	0.533616
	151.779	0.534282	0.592517	0.785269	0.501748	0.529695
	153.78	0.557184	1.04436	0.604952	0.454928	0.538929
	155.777	0.561722	1.03495	0.467492	0.448801	0.555369
	157.778	0.69499	0.826748	0.427294	0.42514	0.525717
	159.777	1.1973	0.624254	0.446209	0.40878	0.533011
	161.775	1.15695	0.483121	0.426334	0.411908	0.546935
	163.778	0.699149	0.438652	0.432318	0.404059	0.538931
	165.779	0.533657	0.433617	0.421317	0.43699	0.571023
	167.78	0.477935	0.428413	0.414248	0.406009	0.625932
	169.779	0.472495	0.467078	0.413802	0.40969	1.39654
	171.779	0.456455	0.489896	0.423765	0.439194	1.21201
	173.777	0.450201	0.705603	0.390626	0.41627	0.759296
	175.775	0.466307	1.17145	0.433002	0.397238	0.587322
	177.776	0.459968	0.998592	0.468952	0.39658	0.533391
	179.778	0.446609	0.691549	0.443731	0.421587	0.545159
	181.779	0.468194	0.551579	0.48714	0.39912	0.518757
	183.779	0.460137	0.53356	0.574805	0.407516	0.517951
	185.778	0.476622	0.572632	0.96135	0.414934	0.528604
	187.776	0.464196	0.683352	0.968402	0.413263	0.54919
	189.776	0.456058	0.990533	0.675855	0.411695	0.515302
	191.779	0.459995	0.815679	0.558738	0.399837	0.542404
	193.778	0.457377	0.569787	0.462677	0.409582	0.545399
	195.778	0.448412	0.45061	0.441604	0.433466	0.553887
	197.78	0.457392	0.440184	0.435089	0.413536	0.559246
	199.779	0.444165	0.464656	0.431859	0.48315	0.554495
	201.775	0.44981	0.488562	0.41177	0.6493	0.583647
	203.78	0.457593	0.662471	0.407643	1.41824	0.814591
	205.778	0.44797	1.10758	0.40071	1.10309	1.47778
	207.78	0.44459	0.945955	0.434259	0.773276	1.05186
	209.78	0.458132	0.658272	0.42233	0.574574	0.695827
	211.777	0.45687	0.47264	0.428963	0.469103	0.569989
	213.775	0.47942	0.41026	0.432971	0.430026	0.550361
	215.778	0.463007	0.404651	0.458591	0.410009	0.543755
	217.777	0.522728	0.397281	0.418729	0.431168	0.542732
	219.777	0.579127	0.393608	0.412504	0.43421	0.51711
	221.78	1.38034	0.393573	0.407489	0.408921	0.534853
	223.777	1.09338	0.384985	0.41961	0.448668	0.542094
	225.778	0.697704	0.387012	0.416445	0.449447	0.551342
	227.779	0.525818	0.395773	0.394407	0.449442	0.537135
	229.776	0.500319	0.383267	0.41615	0.573561	0.579702
	231.779	0.484746	0.392224	0.427597	1.26216	1.17355
	233.778	0.465428	0.412691	0.428734	0.961222	1.23304
	235.779	0.480787	0.415263	0.408388	0.642126	0.890423
	237.775	0.474334	0.421846	0.426681	0.457566	0.615512
	239.775	0.448519	0.421419	0.424181	0.419634	0.554402
	241.775	0.455047	0.389837	0.408298	0.425827	0.55241
	243.775	0.432088	0.41164	0.415104	0.409805	0.544139
	245.778	0.450034	0.421548	0.433788	0.416462	0.573583
	247.777	0.447605	0.406554	0.428367	0.400496	0.524195
	249.777	0.469087	0.422732	0.471254	0.380835	0.546595
	251.778	0.476526	0.41895	0.73509	0.402802	0.510772
	253.776	0.459147	0.40979	1.11598	0.415837	0.536877
	255.776	0.471064	0.419651	0.945593	0.421248	0.535324
	257.775	0.548255	0.484284	0.632526	0.41352	0.529787
	259.778	1.39651	0.517151	0.538946	0.445725	0.498801
	261.775	1.1818	1.01181	0.475539	0.486465	0.525965
	263.781	0.710798	1.01311	0.431857	0.595879	0.521018
	265.776	0.532087	0.75602	0.433641	1.32056	0.558354
	267.775	0.475055	0.54525	0.429481	1.01559	0.563362
	269.779	0.45185	0.485635	0.491388	0.643578	0.559322
	271.777	0.459932	0.46517	1.15516	0.527676	0.811834
	273.779	0.489458	0.482608	1.09992	0.519449	1.39852
	275.777	0.586476	0.560207	0.715683	0.494963	1.14088
	277.777	0.756694	1.05426	0.491573	0.530303	0.732886
	279.779	1.12964	0.909426	0.511338	0.739509	0.610359
	281.78	0.759705	0.634904	0.464366	1.01354	0.610814
	283.775	0.542074	0.482072	0.453291	0.695498	0.561164
	285.78	0.468417	0.423725	0.454779	0.514164	0.52951
	287.776	0.460981	0.418742	0.452202	0.49175	0.522081
	289.777	0.436504	0.420917	0.436999	0.448107	0.51959
	291.777	0.427578	0.400343	0.458818	0.420117	0.523159
	293.777	0.435985	0.408694	0.451293	0.420489	0.53327
	295.778	0.427506	0.398959	1.21021	0.42748	0.513676
	297.779	0.440822	0.400464	1.06586	0.420629	0.541745
	299.776	0.435748	0.4053	0.738388	0.42704	0.548338
	301.778	0.445539	0.406624	0.525514	0.409509	0.740548
	303.777	0.463745	0.41546	0.430267	0.431247	1.31094
	305.776	0.686482	0.447708	0.444965	0.410666	0.915963
	307.779	1.30143	0.458081	0.403575	0.427052	0.613793
	309.779	0.832046	1.11798	0.395842	0.470702	0.541803
	311.778	0.545479	1.02657	0.428651	1.38873	0.532545
	313.779	0.477588	0.800912	0.417848	1.12142	0.568568
	315.775	0.433379	0.61122	0.422208	0.680714	0.564814
	317.779	0.416218	0.632531	0.441673	0.48477	0.576523
	319.776	0.420245	0.711079	0.447256	0.463812	0.56029
	321.775	0.422996	0.912087	0.45844	0.497703	0.616606
	323.779	0.435689	0.670059	0.44478	0.705365	1.15035
	325.781	0.434404	0.538206	0.461966	1.16864	1.19675
	327.776	0.438444	0.508512	0.467019	0.756944	0.749265
	329.776	0.459855	0.667006	0.433846	0.535472	0.594286
	331.777	0.471336	0.865537	0.432641	0.47719	0.566605
	333.775	0.536244	0.613604	0.457148	0.467082	0.568562
	335.778	0.954404	0.455334	0.557058	0.501222	0.549916
	337.779	1.09328	0.419256	0.862838	0.481334	0.561094
	339.777	0.702565	0.454221	0.90669	0.592541	0.794172
	341.777	0.492757	0.413343	0.629113	1.34503	1.24215
	343.778	0.454034	0.432944	0.516444	0.962648	0.874737
	345.779	0.444334	0.418528	0.457507	0.585632	0.67265
	347.778	0.459975	0.405864	0.439322	0.472122	0.576514
	349.779	0.475524	0.412798	0.43686	0.440486	0.578151
	351.775	0.593716	0.408943	0.430325	0.443313	0.560801
	353.777	1.3026	0.427968	0.431703	0.407321	0.583182
	355.778	0.846021	0.417167	0.438233	0.462922	0.602253
	357.777	0.497077	0.432605	0.586207	0.456512	0.794746
	359.778	0.46019	0.70659	1.2644	0.774589	1.27261
	361.776	0.44903	1.09957	0.961916	1.31545	0.926485
	363.776	0.439048	0.95217	0.622947	0.781375	0.649749
	365.779	0.467217	0.672188	0.472061	0.570097	0.558721
	367.778	0.443612	0.481996	0.463521	0.451646	0.527684
	369.776	0.496362	0.457635	0.438081	0.476945	0.544911
	371.779	1.04666	0.50442	0.44	0.681447	0.523939
	373.779	1.07827	0.662253	0.44624	1.20822	0.554353
	375.776	0.621074	0.823004	0.46373	0.799067	0.551666
	377.779	0.453382	0.63235	1.088	0.534401	0.606836
	379.777	0.424546	0.47723	1.00847	0.455009	1.30572
	381.78	0.42975	0.43414	0.651536	0.43734	1.01322
	383.777	0.426681	0.444205	0.48426	0.404378	0.654563
	385.777	0.453395	0.443027	0.46562	0.409244	0.597454
	387.775	0.453718	0.41108	0.436377	0.413322	0.582368
	389.778	0.499562	0.420451	0.42754	0.438912	0.561554
	391.778	0.714748	0.411541	0.444359	1.14872	0.558656
	393.781	1.08333	0.442621	0.440465	1.14769	0.544204
	395.78	0.662839	0.407811	0.453833	0.703014	0.563177
	397.777	0.466029	0.416293	0.427658	0.488761	0.698593
	399.779	0.437868	0.406807	0.467736	0.459915	1.25517
	401.776	0.420459	0.408687	0.496412	0.480551	0.94991
	403.779	0.413533	0.395781	1.0168	0.474778	0.652654
	405.778	0.441409	0.392493	1.1571	0.604011	0.611895
	407.777	0.424413	0.415376	0.749039	1.16808	0.592057
	409.779	0.436311	0.409048	0.491538	0.857977	0.625303
	411.776	0.442006	0.427767	0.440171	0.551502	0.632698
	413.78	0.451619	0.423722	0.439835	0.47837	0.749176
	415.779	0.488533	0.427835	0.428159	0.434687	1.10764
	417.78	0.568866	0.442927	0.423439	0.444254	0.858296
	419.777	1.2029	0.474719	0.422443	0.45507	0.647949
	421.778	0.949401	0.934127	0.428614	0.464024	0.58733
	423.779	0.578849	0.924189	0.43773	0.435698	0.604925
	425.777	0.471181	0.715905	0.488638	0.524253	0.80593
	427.78	0.464636	0.557854	0.515009	1.26523	1.18342
	429.775	0.458887	0.481837	0.690767	0.944447	0.893521
	431.781	0.473793	0.437893	1.06981	0.594931	0.672703
	433.779	0.495998	0.417755	0.700881	0.490281	0.601861
	435.776	1.01698	0.443025	0.509345	0.461077	0.579958
	437.778	0.935665	0.424258	0.429262	0.475896	0.59182
	439.777	0.608542	0.424442	0.420512	0.474022	0.648321
	441.778	0.498502	0.401577	0.409695	0.545438	1.0199
	443.781	0.464742	0.426014	0.43777	0.936342	0.85273
	445.779	0.457566	0.427747	0.414332	0.95112	0.645535
	447.776	0.445608	0.420689	0.41632	0.634338	0.574568
	449.779	0.469413	0.426772	0.419857	0.43812	0.613591
	451.775	0.498797	0.40506	0.423405	0.437992	0.715947
	453.776	0.955073	0.443386	0.452363	0.433982	1.33369
	455.776	0.968966	0.419661	0.4394	0.404323	0.861586
	457.778	0.56378	0.427047	0.449205	0.455924	0.644881
	459.777	0.448055	0.440183	0.433059	0.434274	0.579359
	461.776	0.430721	0.446774	0.439453	0.469734	0.546301
	463.778	0.428988	0.438329	0.45618	0.982179	0.550345
	465.78	0.435049	0.450625	0.581065	1.10994	0.547434
	467.779	0.441201	0.440383	0.669046	0.622124	0.537228
	469.776	0.426589	0.49301	1.08686	0.443351	0.550577
	471.781	0.435974	0.91901	0.797894	0.434997	0.556177
	473.778	0.428517	0.962638	0.530742	0.463114	0.565161
	475.776	0.438554	0.801449	0.457087	0.420761	0.554804
	477.776	0.430802	0.570917	0.455737	0.40884	0.549677
	479.778	0.45896	0.470731	0.426753	0.438572	0.585405
	481.776	0.484454	0.450857	0.412611	0.470184	0.631968
	483.779	1.16316	0.411679	0.400954	1.12023	1.26965
	485.777	0.952519	0.441681	0.434217	1.09896	1.04988
	487.777	0.553548	0.439123	0.434678	0.649368	0.66729
	489.776	0.459685	0.394985	0.439728	0.47411	0.576292
	491.781	0.479564	0.422589	0.581389	0.487628	0.551927
	493.779	0.436292	0.422753	0.87291	0.460608	0.545271
	495.775	0.446717	0.436057	0.69993	0.537823	0.558184
	497.779	0.467107	0.479905	0.623114	0.995478	0.578135
	499.776	0.527366	0.876045	0.513776	0.964634	0.599797
	501.775	1.11306	0.953809	0.471148	0.556162	0.607201
	503.774	0.942094	0.765709	0.447279	0.448668	0.821721
	505.776	0.550451	0.566343	0.457437	0.429683	1.20951
	507.774	0.49266	0.480823	0.461272	0.455309	0.835935
	509.775	0.470786	0.438315	0.462576	0.436465	0.593712
	511.775	0.513584	0.429254	0.649953	0.457124	0.559671
	513.775	0.484036	0.425225	1.12113	0.451643	0.542276
	515.78	0.477356	0.442274	0.857049	0.442986	0.563919
	517.774	0.461619	0.419873	0.524107	0.429027	0.546156
	519.776	0.483114	0.407849	0.43578	0.430517	0.544391
	521.775	0.480214	0.425205	0.428858	0.430771	0.541891
	523.775	0.47312	0.405994	0.4092	0.569634	0.54643
	525.775	0.456684	0.405923	0.414834	1.22191	0.536252
	527.778	0.442107	0.4176	0.439102	0.940098	0.554823
	529.777	0.446885	0.425277	0.413451	0.605207	0.555113
	531.776	0.447869	0.4276	0.414943	0.484984	0.544268
	533.775	0.456947	0.434299	0.433776	0.434871	0.540957
	535.776	0.469129	0.473481	0.444078	0.44622	0.543855
	537.776	0.476928	0.951785	0.434015	0.476007	0.548749
	539.777	0.505413	0.890286	0.414363	1.13723	0.546136
	541.777	0.600862	0.686195	0.425044	1.04984	0.556252
	543.776	1.30223	0.539448	0.413014	0.683114	0.569271
	545.779	0.934137	0.464751	0.413419	0.585542	0.584182
	547.776	0.588109	0.455485	0.443553	0.491151	0.629764
	549.776	0.516919	0.440985	0.418445	0.501456	0.925411
	551.776	0.470269	0.458336	0.432308	0.648499	1.28226
	553.778	0.478185	0.549681	0.411692	1.02647	0.952051
	555.776	0.458909	0.902446	0.424972	0.677904	0.677087
	557.779	0.447104	0.703471	0.422959	0.488025	0.591934
	559.778	0.48103	0.523093	0.431665	0.455931	0.564355
	561.777	0.474141	0.46505	0.443163	0.465822	0.558531
	563.776	0.474749	0.462559	0.442383	0.476373	0.559662
	565.777	0.467249	0.42026	0.45484	0.885905	0.540096
	567.779	0.468097	0.416809	0.444418	0.928392	0.562144
	569.778	0.461934	0.423969	0.4216	0.625779	0.603102
	571.778	0.473277	0.423824	0.423025	0.528767	0.703051
	573.777	0.458839	0.394006	0.431294	0.464866	1.30543
	575.776	0.468088	0.402949	0.432958	0.481073	1.11038
	577.777	0.463362	0.417357	0.466214	0.801983	0.752648
	579.779	0.476727	0.434231	0.516772	1.0239	0.610308
	581.775	0.488604	0.485333	0.622329	0.619031	0.571709
	583.778	0.504098	0.467946	1.07838	0.496053	0.559823
	585.776	0.519907	0.441966	0.897737	0.470951	0.575205
	587.777	1.34459	0.473498	0.597789	0.474097	0.589448
	589.78	1.06097	0.573574	0.458702	0.592105	0.677503
	591.778	0.657898	0.824294	0.446941	1.13694	1.20828
	593.779	0.508354	0.852998	0.424559	0.785359	0.989941
	595.776	0.489135	0.665903	0.426521	0.503028	0.680893
	597.778	0.47445	0.49823	0.472073	0.455101	0.580517
	599.777	0.481389	0.444248	0.423272	0.439453	0.572227
Figure 2I
	Time (sec)
	0	0.726554	0.564885	0.452594	0.492584	0.635929
	1.776	0.691464	0.547504	0.47354	0.506488	0.636658
	3.774	0.727606	0.541525	0.473064	0.561459	0.681528
	5.777	0.71815	0.564653	0.464456	0.55085	0.667721
	7.775	0.715805	0.560855	0.462577	0.673645	0.632065
	9.778	0.72867	0.565452	0.459067	0.702599	0.667281
	11.774	0.726689	0.553009	0.465657	0.622319	0.65703
	13.777	0.695066	0.558945	0.476155	0.576384	0.669405
	15.778	0.696647	0.553896	0.461959	0.52985	0.643459
	17.774	0.684099	0.547792	0.472919	0.494247	0.644429
	19.773	0.683024	0.565097	0.479282	0.512545	0.654075
	21.776	0.669135	0.549282	0.459362	0.499271	0.662758
	23.777	0.699048	0.533051	0.488681	0.481545	0.644999
	25.778	0.655482	0.5399	0.469277	0.514697	0.652282
	27.778	0.651615	0.545999	0.477731	0.505309	0.66965
	29.776	0.67492	0.549638	0.454223	0.514802	0.661932
	31.776	0.699542	0.54155	0.460088	0.503742	0.641851
	33.774	0.709857	0.53677	0.455872	0.515661	0.646416
	35.775	0.712633	0.552745	0.475357	0.515521	0.645257
	37.775	0.727837	0.534198	0.466575	0.535244	0.662554
	39.774	0.708362	0.537519	0.472157	0.530939	0.664295
	41.772	0.725729	0.540262	0.447854	0.531212	0.654462
	43.773	0.682323	0.541983	0.45324	0.497365	0.670768
	45.772	0.703988	0.541827	0.462038	0.498037	0.672995
	47.772	0.72031	0.564898	0.461103	0.508227	0.630705
	49.776	0.643954	0.536162	0.445975	0.486869	0.630275
	51.773	0.674529	0.524271	0.44886	0.497215	0.646742
	53.773	0.657884	0.533141	0.449782	0.487767	0.637704
	55.775	0.680834	0.553016	0.472046	0.487846	0.664518
	57.772	0.716344	0.52048	0.439711	0.499138	0.676161
	59.773	0.715065	0.574981	0.484039	0.555225	0.69443
	61.774	0.642458	0.541451	0.446862	0.499496	0.677479
	63.771	0.638399	0.498415	0.476931	0.510034	0.687363
	65.775	0.660541	0.463628	0.446001	0.492362	0.667053
	67.775	0.633518	0.499302	0.455115	0.481732	0.692125
	69.774	0.627619	0.49427	0.444258	0.514611	0.677083
	71.775	0.687137	0.492594	0.449965	0.51907	0.702
	73.774	0.66023	0.474463	0.443933	0.505828	0.667026
	75.776	0.62162	0.476396	0.446062	0.512333	0.69116
	77.775	0.645954	0.506312	0.454089	0.489959	0.696328
	79.772	0.636362	0.524502	0.459109	0.514586	0.682194
	81.774	0.687184	0.540775	0.466692	0.524232	0.681748
	83.775	0.642071	0.524861	0.450827	0.504103	0.761325
	85.774	0.630723	0.529341	0.471449	0.522652	0.709942
	87.775	0.638226	0.534985	0.481392	0.564654	0.698149
	89.775	0.658357	0.548712	0.470278	1.20696	0.699077
	91.775	0.648407	0.780925	0.473862	1.25194	0.70738
	93.775	0.617639	1.15305	0.482612	1.10291	0.70927
	95.772	0.6451	1.13884	0.486678	0.983572	0.703917
	97.775	0.636659	1.02918	0.501951	0.885466	0.772265
	99.775	0.646802	1.00599	0.531143	0.947038	0.920115
	101.776	0.736032	0.935054	1.03368	1.05041	1.51114
	103.773	1.35435	1.06554	1.04202	1.1758	1.3913
	105.774	1.48683	1.25897	0.899513	1.19318	1.2509
	107.775	1.34304	1.28868	0.68847	1.13906	1.04316
	109.775	1.16805	1.36682	0.563767	1.02465	0.899862
	111.775	0.94719	1.41067	0.512413	0.847641	0.841981
	113.774	0.803084	1.31722	0.506598	0.95182	0.809865
	115.777	0.733141	1.32438	0.49627	1.09397	0.878035
	117.776	0.676096	1.2266	0.465787	0.879656	1.2728
	119.772	0.642507	1.1211	0.468085	0.792283	1.30482
	121.777	0.627419	0.928729	0.453909	0.804021	1.23468
	123.773	0.677012	1.01479	0.48319	1.07916	1.02429
	125.779	0.832947	1.19978	0.47429	1.04066	0.845717
	127.773	1.43375	1.16686	0.45873	0.738517	0.71986
	129.777	1.38743	0.951559	0.457991	0.611834	0.657211
	131.772	1.19986	0.860117	0.459988	0.557947	0.682665
	133.774	0.906723	0.970452	0.48311	0.52308	0.659943
	135.773	0.75252	1.39098	0.503486	0.554576	0.660358
	137.774	0.707157	1.07743	0.638158	0.589688	0.697085
	139.775	0.680575	0.802769	1.12875	0.670877	0.662282
	141.776	0.788315	0.715933	0.919974	0.758992	0.701873
	143.773	0.764116	0.704793	0.775162	1.00218	0.681854
	145.776	0.779982	0.698256	0.622972	0.895262	0.667361
	147.773	1.00708	0.892701	0.585694	0.742521	0.690526
	149.775	1.22579	1.40952	0.550797	0.642206	0.670757
	151.773	1.40839	1.211	0.530789	0.581764	0.634272
	153.773	1.39779	0.801131	0.510784	0.556496	0.657636
	155.775	1.37282	0.679526	0.546683	0.586755	0.639896
	157.773	1.3444	0.652627	0.611687	0.665829	0.742063
	159.776	1.23464	0.644547	0.590478	1.13742	0.694733
	161.773	1.15756	0.660083	0.573033	1.0353	0.753221
	163.775	1.11991	0.684189	0.526927	0.855287	0.929227
	165.776	0.969408	0.985848	0.489227	0.644411	1.29451
	167.777	0.884815	1.3491	0.479291	0.642916	1.21839
	169.772	0.888427	1.10237	0.459597	0.781415	0.959351
	171.774	0.888938	0.767203	0.475908	0.997289	0.760484
	173.773	0.914381	0.679653	0.485296	0.796281	0.660401
	175.776	0.928016	0.669297	0.650819	0.623982	0.640577
	177.776	0.927621	0.639304	1.03608	0.550975	0.653818
	179.774	0.936564	0.626522	0.840309	0.666055	0.641112
	181.773	0.903372	0.630571	0.641986	1.18691	0.631291
	183.773	0.919766	0.669114	0.505957	1.00185	0.633903
	185.775	0.911472	0.654773	0.479092	0.7403	0.631575
	187.774	0.874952	0.702218	0.474608	0.615328	0.67421
	189.778	0.855975	1.3251	0.49559	0.632365	0.651855
	191.774	0.814004	1.17628	0.468257	0.76469	0.666751
	193.774	0.870973	0.894186	0.502984	1.08793	0.652218
	195.773	0.903907	0.708544	0.480059	0.868602	0.629656
	197.773	0.893806	0.673205	0.477121	0.728073	0.662202
	199.776	0.972166	0.654546	0.474007	0.686171	0.640586
	201.776	0.938811	0.673911	0.47642	0.932925	0.656767
	203.772	0.896497	0.689793	0.53718	0.888713	0.68052
	205.776	0.938482	1.36453	0.881427	0.676431	0.638115
	207.773	0.932977	1.28496	0.907679	0.599822	0.643168
	209.774	0.967791	0.943479	0.708615	0.691113	0.644333
	211.775	0.92926	0.714308	0.59151	1.05613	0.644172
	213.772	0.961488	0.699065	0.663395	0.880207	0.662039
	215.774	0.874995	0.706836	0.858552	0.679371	0.640524
	217.773	0.884111	0.689927	0.59306	0.595888	0.637136
	219.775	0.898656	0.714721	0.496736	0.622778	0.642815
	221.772	0.932197	1.3594	0.467819	1.11248	0.615829
	223.775	0.942573	1.18929	0.487371	1.04818	0.660813
	225.775	0.930356	0.885284	0.490247	0.850918	0.637321
	227.775	0.921175	0.682771	0.519014	0.668106	0.69006
	229.773	0.858416	0.715975	0.885665	0.659005	0.662862
	231.775	0.839197	1.08392	0.959949	1.04982	0.787614
	233.776	0.772992	1.33617	0.756334	0.888424	1.08554
	235.776	0.798825	1.07141	0.538131	0.806739	1.31287
	237.775	0.769131	0.795776	0.512314	0.90598	1.07282
	239.776	0.769927	0.787999	0.522639	0.936199	0.828257
	241.772	0.856425	1.1467	0.537459	0.76556	0.667197
	243.772	0.860951	1.15289	0.640009	0.723115	0.642347
	245.776	0.946373	0.784049	0.810954	0.928349	0.606964
	247.775	0.929553	0.709271	0.663996	1.00119	0.622137
	249.775	1.02911	0.689888	0.560442	0.756251	0.628834
	251.772	0.984107	0.691272	0.626998	0.70441	0.638224
	253.773	0.984808	0.687374	0.842587	0.845999	0.645866
	255.774	0.858859	0.721719	0.684873	0.838897	0.661173
	257.775	0.735689	0.741502	0.542592	0.72364	0.605589
	259.773	0.688049	1.42094	0.487834	0.866087	0.61476
	261.772	0.679482	1.23492	0.489397	0.925782	0.639406
	263.775	0.685172	0.845085	0.497096	0.856236	0.634888
	265.775	0.666975	0.729007	0.844556	0.788644	0.594717
	267.775	0.669609	0.690356	0.858257	0.896996	0.63375
	269.775	0.657714	0.695064	0.62469	0.941176	0.631932
	271.775	0.669348	1.29846	0.559577	0.826634	0.631317
	273.775	1.23259	1.25859	0.726723	0.742186	0.670025
	275.774	1.40563	0.829437	0.807277	0.816928	0.70857
	277.774	1.2728	0.709569	0.616522	0.976048	1.27952
	279.775	1.02235	0.698636	0.570924	0.863401	1.13794
	281.773	0.861634	0.714789	0.581225	0.81111	0.939484
	283.774	0.76723	1.28398	0.61556	0.889566	0.700829
	285.775	0.692017	1.31448	0.819513	0.846481	0.638843
	287.774	0.674139	0.965669	0.696322	0.770809	0.628374
	289.774	0.657907	0.738942	0.582081	0.795314	0.62059
	291.772	0.674996	0.727773	0.705589	0.963117	0.635939
	293.774	0.64532	0.728094	0.78745	0.917959	0.607924
	295.775	0.669068	0.908857	0.722527	0.737643	0.639615
	297.773	0.657818	1.37473	0.592331	0.778684	0.638316
	299.774	0.723859	1.02086	0.768699	0.956154	0.619254
	301.773	0.702158	0.760343	0.82762	0.851054	0.629313
	303.774	0.854955	0.75326	0.556291	0.752471	0.62585
	305.773	1.45205	0.772137	0.511081	1.01728	0.62942
	307.775	1.31226	1.44697	0.636388	0.979091	0.655187
	309.774	1.13848	1.24788	0.83382	0.805846	0.628655
	311.774	0.964086	0.892552	0.677395	0.6892	0.625058
	313.773	0.789326	0.774952	0.572549	0.882648	0.615029
	315.774	0.700569	0.848108	0.689719	1.03574	0.626545
	317.772	0.695322	1.33174	0.761789	0.880068	0.656334
	319.774	0.693341	1.0112	0.539857	0.678464	0.733524
	321.775	0.683986	0.749801	0.509255	0.691313	1.30551
	323.773	0.680198	0.732443	0.548396	1.00241	1.15107
	325.777	0.709803	0.744404	0.829803	0.925308	0.911754
	327.773	0.731006	1.36099	0.715519	0.837776	0.691443
	329.776	0.728436	1.24406	0.608124	0.827663	0.632259
	331.773	0.943303	0.895128	0.836006	1.00811	0.655504
	333.776	1.36083	0.771803	0.701564	0.857222	0.640695
	335.775	1.23471	0.815654	0.597763	0.709469	0.61337
	337.776	1.13703	1.40193	0.822238	0.712239	0.629388
	339.776	0.912064	1.16355	0.798405	1.00012	0.653185
	341.775	0.821251	0.879993	0.625435	1.00796	0.626574
	343.771	0.710449	0.78998	0.608189	0.80865	0.643507
	345.775	0.710486	1.24337	0.818099	0.808866	0.640893
	347.771	0.699817	1.30119	0.613388	0.956252	0.646534
	349.772	0.701273	1.01396	0.548594	0.917056	0.702635
	351.772	0.730415	0.808366	0.601144	0.739464	1.14689
	353.772	0.720332	0.812098	0.878656	0.726423	1.27517
	355.771	0.731893	1.41603	0.699065	0.959046	1.05423
	357.772	0.697254	1.26352	0.58647	0.808911	0.8125
	359.774	0.740457	0.984505	0.811057	0.708101	0.648647
	361.772	1.19526	0.852436	0.777525	0.860977	0.658451
	363.775	1.36977	0.827519	0.742226	0.919477	0.632782
	365.772	1.21759	1.35476	0.707761	0.723635	0.614709
	367.776	1.02062	1.23532	0.740712	0.651659	0.615565
	369.774	0.844824	0.943731	0.841604	0.645849	0.595837
	371.773	0.817127	0.806971	0.711749	0.929177	0.616686
	373.775	0.75118	0.856978	0.71684	0.9039	0.621031
	375.774	0.745275	1.40555	0.656937	0.746999	0.628571
	377.775	0.784825	1.29523	0.73153	0.658148	0.714217
	379.774	0.735535	0.921723	0.799843	0.673994	1.29501
	381.776	0.746348	0.76364	0.584203	1.07592	1.12136
	383.773	0.77235	0.809715	0.717087	0.988022	0.877135
	385.777	0.779397	1.2668	0.768807	0.739342	0.731647
	387.773	0.980409	1.36504	0.602498	0.674013	0.667206
	389.774	1.34542	1.06312	0.680453	0.753885	0.677923
	391.772	1.2948	0.814877	0.743005	0.906161	0.634029
	393.776	1.12019	0.733256	0.629125	0.738661	0.647305
	395.774	0.989766	0.799801	0.629716	0.709206	0.635931
	397.776	0.935525	1.36295	0.784183	1.01785	0.680396
	399.774	0.952913	1.26229	0.742197	0.905103	0.696414
	401.772	0.964197	1.0243	0.621588	0.769695	0.689991
	403.773	1.21864	0.825375	0.628061	0.639187	0.699709
	405.774	1.25796	1.18381	0.752511	0.658524	1.17793
	407.774	1.06524	1.28988	0.663262	1.0382	1.22143
	409.773	0.968302	1.01002	0.661336	0.938809	0.931486
	411.775	0.930645	0.827202	0.78431	0.70539	0.707728
	413.771	0.900921	0.808962	0.701495	0.612681	0.641117
	415.774	1.07957	1.33457	0.719781	0.737509	0.637316
	417.772	1.28946	1.25528	0.719543	1.04768	0.643443
	419.775	1.28088	0.947861	0.584576	0.92274	0.644192
	421.777	1.05364	0.839073	0.690646	0.70592	0.629675
	423.775	0.874951	0.897154	0.798517	0.677596	0.610183
	425.774	0.914951	1.37136	0.673663	0.778948	0.608407
	427.774	1.25149	1.11943	0.649706	0.857787	0.644444
	429.776	1.14472	0.847851	0.726331	0.742428	0.704065
	431.776	1.01111	0.786151	0.716031	0.647474	1.30082
	433.774	0.8675	0.968585	0.597671	0.721615	1.09141
	435.774	0.834009	1.33935	0.598875	0.916839	0.783277
	437.773	0.791948	1.10411	0.796647	0.798435	0.682801
	439.773	0.851013	0.830622	0.635323	0.643092	0.66177
	441.776	0.984775	0.793276	0.578928	0.686782	0.638606
	443.772	1.35656	0.782574	0.588112	0.870072	0.621755
	445.774	1.39103	1.36387	0.702414	0.830048	0.643313
	447.775	1.20391	1.31389	0.717239	0.7781	0.639083
	449.777	1.04449	0.959478	0.666287	0.708601	0.639474
	451.775	0.970873	0.810171	0.6138	0.819512	0.634733
	453.776	0.889437	0.833721	0.749363	0.981899	1.03334
	455.772	0.897901	1.34469	0.663199	0.834165	1.20413
	457.777	1.16719	1.261	0.635759	0.736799	0.961525
	459.773	1.33454	0.963057	0.672948	0.754822	0.734453
	461.775	1.1567	0.922045	0.704131	0.769769	0.677232
	463.774	1.03466	1.22058	0.715256	0.7711	0.696015
	465.777	1.00451	1.10467	0.664407	0.860353	0.674545
	467.773	1.06532	0.920624	0.695223	0.785389	0.833311
	469.776	1.22637	1.02692	0.671703	0.629291	1.23061
	471.773	1.27972	1.33302	0.688392	0.586018	1.04941
	473.771	1.12744	1.17643	0.660995	0.585691	0.833261
	475.772	0.925643	0.994319	0.648242	0.607786	0.729039
	477.772	0.924187	0.886357	0.644614	0.932505	0.705031
	479.776	0.958912	1.26328	0.675028	0.917399	0.70688
	481.773	1.26891	1.18942	0.687658	0.706695	0.756897
	483.779	1.27209	0.982141	0.728718	0.595985	1.13377
	485.773	1.143	0.908806	0.682986	0.55638	1.17314
	487.776	0.971465	1.20362	0.677328	0.681303	0.989936
	489.776	0.930657	1.1922	0.670207	1.0227	0.750133
	491.773	1.09022	0.957537	0.638991	0.763326	0.674651
	493.776	1.34396	0.931799	0.655443	0.622033	0.653356
	495.775	1.31836	1.28199	0.647792	0.642426	0.667084
	497.775	1.17652	1.18466	0.687827	0.92839	0.852953
	499.775	1.08329	0.907663	0.692079	0.835234	1.17151
	501.777	1.06483	0.812277	0.660929	0.700637	1.07783
	503.774	1.11746	1.33884	0.656367	0.64206	0.84159
	505.775	1.25393	1.2657	0.692805	0.834038	0.752893
	507.773	1.20296	1.00698	0.683231	0.927492	0.724011
	509.775	1.03275	0.835986	0.716947	0.739052	0.726309
	511.774	0.889759	1.26384	0.682408	0.571306	0.744194
	513.772	0.929236	1.2727	0.666562	0.562454	1.01394
	515.777	0.956924	1.00762	0.692206	0.57978	1.05291
	517.775	1.2795	0.805401	0.670017	0.719335	0.934314
	519.772	1.21843	1.20815	0.706024	0.795018	0.735578
	521.773	1.21884	1.21519	0.640629	0.744697	0.700251
	523.776	1.08342	1.02501	0.609942	0.60577	0.666384
	525.776	1.08917	0.835102	0.600676	0.612708	0.676503
	527.774	1.0179	1.2034	0.700179	0.951654	0.693267
	529.773	1.13983	1.32726	0.674317	0.838251	0.969049
	531.776	1.29502	1.0734	0.627947	0.674325	1.09626
	533.773	1.06065	0.82509	0.648284	0.711939	0.886606
	535.776	0.998076	0.920637	0.678493	0.671842	0.683562
	537.774	0.924585	1.35816	0.676585	0.578556	0.617421
	539.775	0.91167	1.25921	0.673154	0.698569	0.65996
	541.776	1.1709	1.04485	0.673365	1.00025	0.646
	543.773	1.23749	0.908087	0.602888	0.905352	0.630954
	545.778	1.22513	1.29	0.631058	0.709099	0.620227
	547.772	1.03738	1.27481	0.7063	0.622385	0.614522
	549.774	0.960307	0.941908	0.741231	0.822242	0.688694
	551.773	0.896279	0.820406	0.663114	0.933152	1.12493
	553.773	0.972797	0.926352	0.704362	0.808591	1.11416
	555.775	1.21065	1.27926	0.613616	0.675275	0.931654
	557.772	1.23953	1.12282	0.675865	0.5949	0.748658
	559.775	1.21434	0.890859	0.732738	0.584213	0.64246
	561.776	1.13031	0.8072	0.675971	0.780103	0.63604
	563.776	0.996926	0.909588	0.705352	1.00227	0.618623
	565.776	0.95242	1.34928	0.686456	0.859151	0.660231
	567.774	1.002	1.13637	0.643164	0.647812	0.60272
	569.774	1.12308	0.932465	0.652648	0.567128	0.652615
	571.772	1.23276	0.814351	0.68545	0.544851	0.682398
	573.776	1.20512	0.991197	0.639898	0.530158	0.682503
	575.773	1.12746	1.2929	0.612757	0.800921	0.908667
	577.774	0.991756	1.24303	0.614	0.939041	1.11482
	579.775	1.01096	1.05574	0.584395	0.726669	0.983895
	581.771	1.06927	0.922157	0.572202	0.583505	0.811686
	583.777	1.19627	0.936551	0.631533	0.551306	0.685831
	585.776	1.14316	1.31902	0.64443	0.513653	0.684189
	587.772	1.02405	1.23009	0.676286	0.586233	0.637333
	589.775	0.996947	0.98564	0.643367	0.939522	0.646413
	591.774	1.19207	0.853595	0.65705	0.822224	0.686165
	593.775	1.23352	0.857683	0.696496	0.677899	0.921751
	595.777	1.15197	1.28961	0.661568	0.605833	1.18138
	597.776	1.10319	1.19207	0.602155	0.575825	0.974128
	599.773	1.0206	1.0001	0.676232	0.552519	0.758803
Figure 2J
	Time (sec)
	0	0.443996	0.569254	0.447154	0.469066	0.449551
	1.772	0.44142	0.579002	0.445562	0.463918	0.455948
	3.773	0.43464	0.603409	0.454402	0.464989	0.438558
	5.776	0.526157	0.606032	0.467495	0.475359	0.440814
	7.772	1.197	0.564685	0.50345	0.458683	0.430597
	9.773	1.0543	0.58637	0.577252	0.473792	0.460833
	11.777	0.715914	0.590793	1.0367	0.449045	0.434122
	13.775	0.520865	0.596196	1.03754	0.466283	0.440625
	15.774	0.483386	0.605808	0.845848	0.460125	0.445381
	17.776	0.427428	0.58347	0.703141	0.459737	0.43686
	19.775	0.425522	0.565108	0.55961	0.458702	0.440272
	21.772	0.432649	0.593947	0.538799	0.451089	0.441822
	23.778	0.428597	0.583317	0.470765	0.455974	0.429626
	25.773	0.425947	0.629904	0.479287	0.470355	0.437251
	27.771	0.424715	0.625767	0.444523	0.448438	0.444093
	29.776	0.446273	0.627986	0.456801	0.460093	0.434699
	31.771	0.438175	0.627913	0.463863	0.472955	0.438698
	33.772	0.44313	0.611054	0.474487	0.465444	0.434269
	35.774	0.431507	0.601231	0.444819	0.463904	0.437669
	37.772	0.437701	0.586238	0.446112	0.472322	0.444573
	39.774	0.422416	0.580662	0.416566	0.469493	0.438239
	41.773	0.421351	0.551645	0.438616	0.509561	0.448864
	43.77	0.439616	0.576843	0.456218	0.491555	0.450772
	45.772	0.441153	0.561839	0.440181	0.469609	0.450914
	47.774	0.438762	0.568283	0.428547	0.479913	0.447521
	49.774	0.436246	0.537176	0.435433	0.469046	0.441436
	51.772	0.463109	0.605899	0.416162	0.469895	0.456017
	53.776	0.408052	0.603857	0.406022	0.489093	0.435103
	55.771	0.426691	0.575504	0.418257	0.460174	0.439382
	57.772	0.425337	0.580534	0.454874	0.466012	0.426533
	59.775	0.307847	0.451625	0.319937	0.412152	0.325394
	61.774	0.464596	0.617464	0.338519	0.62637	0.639789
	63.773	0.398887	0.546527	0.401061	0.44132	0.418432
	65.774	0.433548	0.554561	0.442452	0.460486	0.438701
	67.775	0.45628	0.56211	0.43781	0.473968	0.428566
	69.772	0.457358	0.5555	0.445156	0.465463	0.450746
	71.773	0.414009	0.539965	0.467359	0.443901	0.441575
	73.772	0.430778	0.540654	0.443581	0.463648	0.452312
	75.774	0.435972	0.551696	0.4634	0.465587	0.444861
	77.772	0.450536	0.556194	0.484351	0.45669	0.473301
	79.775	0.449204	0.572507	0.477978	0.45593	0.44743
	81.774	0.430218	0.558313	0.867	0.447534	0.447531
	83.772	0.510453	0.586428	1.32265	0.463488	0.452741
	85.773	0.982825	0.658023	1.21079	0.473532	0.465794
	87.774	1.2838	1.0014	0.995539	0.467673	0.43395
	89.775	1.15568	1.10774	0.814249	0.476863	0.483556
	91.776	1.05398	1.08901	0.650445	0.496252	0.482247
	93.776	0.977937	1.04682	0.627501	0.4723	0.484281
	95.774	1.17573	1.13367	0.649993	0.468383	0.48507
	97.775	1.30984	1.12299	0.928901	1.18162	1.35048
	99.772	1.20714	1.28648	1.08724	1.39298	1.4619
	101.771	1.10408	1.21135	0.871312	1.28524	1.40063
	103.771	1.10369	1.15063	0.690287	1.26194	1.39574
	105.773	1.24294	1.06005	0.890579	1.32628	1.43657
	107.774	1.29959	0.971281	1.1004	1.35072	1.52299
	109.778	1.23272	1.0915	0.885245	1.41085	1.58598
	111.77	1.20004	1.07378	0.668398	1.34186	1.50962
	113.773	1.14429	1.09964	0.550547	1.30623	1.47133
	115.77	0.976187	0.941711	0.541418	1.29434	1.37569
	117.773	1.05215	0.766913	0.524752	1.30076	1.38786
	119.771	1.08487	0.759024	0.502629	1.24499	1.30935
	121.775	0.859866	0.7483	0.491969	1.29178	1.29465
	123.774	0.886236	0.698475	0.473979	1.22773	1.32607
	125.776	1.12064	0.7499	0.509977	1.27166	1.21657
	127.776	0.818219	0.745191	0.508739	1.15733	1.17934
	129.774	0.716408	0.884702	0.534696	1.17802	1.23416
	131.772	0.970241	0.980633	0.960546	1.15935	1.20005
	133.775	1.02774	0.784591	1.2541	1.06591	1.03067
	135.775	0.6428	0.740162	1.03803	1.05526	1.1855
	137.773	0.525861	0.857773	0.740983	0.986574	1.28463
	139.791	0.492501	1.18011	0.581982	0.946658	1.14844
	141.773	0.726288	0.887272	0.519255	0.971278	1.05291
	143.771	1.23765	0.675051	0.517187	1.02332	1.15688
	145.774	0.829715	0.576842	0.507463	0.966957	1.16159
	147.773	0.537797	0.619571	0.503842	0.93052	0.993419
	149.775	0.479775	0.579997	0.493752	1.0052	1.18934
	151.775	0.468648	0.610969	0.482362	0.826033	1.16971
	153.776	0.470578	0.594016	0.493643	0.89789	0.834339
	155.772	0.452974	0.592949	0.469164	0.90572	1.13212
	157.775	0.462742	0.623905	0.497099	0.847248	0.974145
	159.772	0.447542	0.588477	0.487557	0.842854	0.896189
	161.774	0.450394	0.558205	0.479228	0.825163	1.0929
	163.771	0.462484	0.565398	0.463266	0.808684	0.760172
	165.776	0.430208	0.579825	0.486479	0.770142	0.677902
	167.771	0.429673	0.563122	0.476418	0.823805	0.796189
	169.775	0.446547	0.557545	0.466422	0.796616	0.906886
	171.773	0.42581	0.59217	0.489535	0.743614	0.888563
	173.771	0.443806	0.584817	0.458816	0.743695	0.813856
	175.773	0.437133	0.616318	0.457121	0.615904	0.699467
	177.773	0.428628	0.587529	0.479323	0.631507	0.683442
	179.773	0.426885	0.578401	0.465637	0.690018	0.790541
	181.776	0.443289	0.588547	0.493322	0.60212	0.694633
	183.773	0.46061	0.589455	0.494783	0.613104	0.680085
	185.773	0.468322	0.583528	0.497595	0.592124	0.632225
	187.771	0.573046	0.599837	0.454265	0.588044	0.568931
	189.774	0.800359	0.582787	0.462092	0.616212	0.522705
	191.773	0.864088	0.586866	0.482127	0.587916	0.530686
	193.775	0.6434	0.582557	0.470391	0.572593	0.511672
	195.773	0.461799	0.573623	0.477464	0.546388	0.486583
	197.773	0.430152	0.60093	0.463374	0.539756	0.524616
	199.774	0.440063	0.625259	0.46189	0.496122	0.494678
	201.774	0.418214	0.632193	0.470764	0.517918	0.505783
	203.774	0.434325	0.646272	0.474956	0.520235	0.498745
	205.772	0.412394	1.05468	0.471315	0.484012	0.535599
	207.774	0.431364	1.00802	0.496266	0.500205	0.517717
	209.774	0.420907	0.766014	0.482827	0.495364	0.497557
	211.772	0.383764	0.686646	0.454593	0.480416	0.520174
	213.776	0.439553	0.62635	0.479833	0.516567	0.497658
	215.774	0.431575	0.624834	0.46387	0.510814	0.50449
	217.774	0.416863	0.624994	0.469132	0.503002	0.501985
	219.771	0.438871	0.673563	0.471828	0.508636	0.516075
	221.775	0.442122	0.624664	0.471284	0.52232	0.529521
	223.773	0.42798	0.624443	0.468118	0.522844	0.508592
	225.775	0.443359	0.684221	0.474462	0.518473	0.498636
	227.774	0.420066	0.646773	0.468302	0.499236	0.515758
	229.772	0.422384	0.643628	0.449156	0.508166	0.510366
	231.774	0.443234	0.690097	0.470463	0.511804	0.528856
	233.77	0.430016	0.678674	0.476352	0.521882	0.543999
	235.772	0.428683	0.666719	0.467958	0.519279	0.614561
	237.774	0.435075	0.668815	0.474647	0.496142	1.10624
	239.777	0.44183	0.692348	0.495697	0.519351	1.0447
	241.774	0.425889	0.646436	0.487544	0.521658	0.781957
	243.769	0.437447	0.653691	0.476188	0.511402	0.641627
	245.773	0.422144	0.67666	0.482689	0.532132	0.638117
	247.776	0.45254	0.672671	0.478583	0.509489	0.744453
	249.772	0.456686	0.674959	0.460623	0.521684	0.720916
	251.773	0.433909	0.662402	0.481813	0.513069	0.648506
	253.774	0.450904	0.656383	0.462631	0.49597	0.559591
	255.772	0.440656	0.63264	0.463408	0.500849	0.542385
	257.773	0.434012	0.655924	0.457797	0.490351	0.568313
	259.77	0.441129	0.631043	0.467908	0.492482	0.508842
	261.773	0.456153	0.655213	0.462596	0.518062	0.531723
	263.777	0.434641	0.662676	0.455651	0.501079	0.491477
	265.772	0.439621	0.64006	0.4588	0.501701	0.490758
	267.771	0.441673	0.61176	0.470716	0.484473	0.513469
	269.773	0.449454	0.603449	0.475699	0.537471	0.480803
	271.774	0.457292	0.576371	0.453308	0.506895	0.504186
	273.773	0.433728	0.608601	0.442129	0.512813	0.493364
	275.772	0.455931	0.620427	0.485781	0.502458	0.501693
	277.776	0.4438	0.621269	0.491855	0.519312	0.51116
	279.775	0.439674	0.589554	0.491403	0.526847	0.490675
	281.775	0.419844	0.616152	0.499065	0.501334	0.50997
	283.775	0.460634	0.629173	0.498123	0.560409	0.502492
	285.775	0.462693	0.608135	0.470222	0.54469	0.495089
	287.775	0.446572	0.605884	0.509775	0.570194	0.499482
	289.772	0.45884	0.558934	0.584644	0.624555	0.493466
	291.771	0.457106	0.589317	0.729754	0.807086	0.475735
	293.776	0.475259	0.619888	0.954395	0.885181	0.502324
	295.775	0.468456	0.621656	0.861108	0.843988	0.509004
	297.772	0.478736	0.628177	0.640366	0.822735	0.468959
	299.774	0.465008	0.585012	0.518848	0.757517	0.518713
	301.775	0.462575	0.568636	0.478036	0.70803	0.482263
	303.771	0.49838	0.564535	0.481914	0.706689	0.49432
	305.771	0.484587	0.573097	0.456119	0.66391	0.495506
	307.772	0.434923	0.579752	0.461052	0.63309	0.492686
	309.772	0.453571	0.587297	0.464174	0.571464	0.495555
	311.773	0.474577	0.584674	0.484429	0.551154	0.519468
	313.775	0.478917	0.630456	0.460284	0.535847	0.4897
	315.774	0.450961	0.589408	0.479516	0.502244	0.497062
	317.772	0.472691	0.636373	0.455481	0.526613	0.492977
	319.774	0.445678	0.622832	0.480004	0.526	0.505943
	321.772	0.454224	0.61218	0.467419	0.514513	0.491614
	323.771	0.430654	0.60302	0.493776	0.503922	0.505315
	325.772	0.464226	0.576034	0.47822	0.518561	0.511355
	327.771	0.486212	0.576798	0.472374	0.485566	0.49805
	329.771	0.479325	0.569911	0.438501	0.496549	0.522134
	331.771	0.470266	0.584504	0.471487	0.501062	0.494227
	333.772	0.503303	0.584226	0.466758	0.504254	0.519463
	335.773	0.472399	0.552673	0.46733	0.481205	0.505178
	337.774	0.429262	0.553688	0.457407	0.488291	0.50225
	339.774	0.460039	0.559527	0.467374	0.502571	0.486193
	341.773	0.454142	0.564318	0.495427	0.495212	0.503841
	343.775	0.444371	0.537607	0.466935	0.49686	0.492739
	345.772	0.44399	0.539525	0.493119	0.507437	0.492857
	347.772	0.453935	0.530382	0.497796	0.493645	0.491478
	349.774	0.453	0.539525	0.508563	0.501861	0.47691
	351.774	0.45239	0.55721	0.570015	0.483437	0.489133
	353.772	0.441781	0.535564	0.651262	0.498358	0.501011
	355.775	0.485256	0.540186	0.970613	0.497021	0.496691
	357.774	0.462857	0.548838	0.88881	0.505279	0.524377
	359.772	0.422215	0.532023	0.628971	0.498034	0.546104
	361.771	0.422529	0.522359	0.518329	0.504456	0.539275
	363.773	0.468153	0.532387	0.475951	0.527982	0.573759
	365.774	0.463013	0.541102	0.466132	0.590452	0.769097
	367.774	0.493938	0.519747	0.467245	0.630153	1.03154
	369.774	0.458627	0.543661	0.455807	0.78073	0.952915
	371.772	0.476973	0.530835	0.467225	0.73117	0.737388
	373.774	0.488834	0.530715	0.476727	0.746926	0.816257
	375.773	0.577143	0.520989	0.444348	0.704133	0.855945
	377.771	1.00683	0.558834	0.476238	0.718068	0.646454
	379.775	0.954394	0.575541	0.465784	0.667158	0.591826
	381.773	0.670878	0.679518	0.44257	0.655931	0.665351
	383.775	0.525811	0.906852	0.467733	0.6496	0.722623
	385.774	0.483352	0.73153	0.466777	0.638117	0.751067
	387.772	0.455982	0.572331	0.502427	0.60854	0.627216
	389.771	0.451736	0.528625	0.465838	0.624999	0.645665
	391.773	0.458492	0.511526	0.470093	0.553488	0.567483
	393.771	0.463303	0.509255	0.482971	0.559325	0.571238
	395.775	0.457095	0.541198	0.467806	0.537134	0.525089
	397.773	0.468232	0.543732	0.468264	0.532004	0.510232
	399.774	0.442877	0.535743	0.459894	0.474694	0.548764
	401.777	0.488744	0.519766	0.447979	0.501867	0.514212
	403.77	0.533219	0.501562	0.455604	0.499668	0.480274
	405.772	0.509415	0.514017	0.469334	0.47134	0.492921
	407.772	0.617552	0.482069	0.479635	0.449767	0.482745
	409.772	0.778803	0.535316	0.516903	0.497392	0.489183
	411.771	0.888949	0.541321	0.499362	0.486554	0.482651
	413.773	0.634027	0.520096	0.466141	0.452445	0.47232
	415.771	0.470771	0.555174	0.453217	0.469921	0.477906
	417.774	0.475706	0.631267	0.474717	0.478751	0.486218
	419.775	0.457738	0.712161	0.470907	0.454809	0.504195
	421.774	0.428579	0.849132	0.448429	0.4768	0.486724
	423.773	0.462336	0.808534	0.466064	0.486066	0.478699
	425.771	0.447054	0.66766	0.471614	0.475475	0.494811
	427.774	0.45213	0.579036	0.492032	0.464331	0.491572
	429.772	0.464909	0.570903	0.571287	0.510024	0.488296
	431.774	0.451659	0.545384	1.16516	0.475374	0.480984
	433.771	0.447073	0.509005	1.07822	0.475843	0.478317
	435.77	0.443889	0.565563	0.762279	0.48671	0.502835
	437.773	0.443388	0.512681	0.552986	0.483063	0.480151
	439.773	0.450443	0.553665	0.501403	0.493373	0.497939
	441.776	0.466109	0.542117	0.469267	0.507832	0.515366
	443.77	0.461919	0.560529	0.471497	0.534047	0.500009
	445.771	0.456327	0.536193	0.48481	0.66554	0.499451
	447.774	0.479536	0.541507	0.491658	0.688708	0.529963
	449.777	0.500596	0.519877	0.453122	0.70455	0.54284
	451.773	0.507949	0.527197	0.44817	0.707009	0.537146
	453.773	0.502654	0.544181	0.498356	0.671376	0.578467
	455.774	0.524745	0.54903	0.492252	0.634092	0.667175
	457.771	0.493501	0.546274	0.480374	0.600268	0.879036
	459.774	0.496879	0.547643	0.509102	0.635349	0.944123
	461.773	0.485128	0.539013	0.492644	0.561421	0.757872
	463.774	0.474196	0.544909	0.500247	0.556341	0.708228
	465.771	0.453139	0.549158	0.468426	0.562816	0.677778
	467.77	0.464665	0.516168	0.504938	0.54291	0.717222
	469.772	0.501694	0.500693	0.472237	0.544257	0.758282
	471.775	0.584554	0.512306	0.499543	0.505559	0.716329
	473.773	0.846632	0.515131	0.507301	0.500503	0.680469
	475.775	0.893673	0.540968	0.488996	0.508139	0.611253
	477.772	0.635773	0.522395	0.530509	0.508512	0.510783
	479.774	0.492968	0.508591	0.557375	0.492582	0.528433
	481.775	0.457633	0.521046	0.566709	0.505742	0.479389
	483.774	0.458536	0.551274	0.520766	0.477881	0.514135
	485.774	0.443829	0.52307	0.482712	0.489347	0.462515
	487.77	0.469991	0.566683	0.50453	0.484177	0.495687
	489.772	0.452982	0.873782	0.486274	0.4921	0.478029
	491.77	0.445057	0.783979	0.498009	0.488457	0.486414
	493.772	0.456017	0.633732	0.475411	0.511607	0.496606
	495.77	0.474512	0.551583	0.485564	0.498433	0.490377
	497.775	0.513202	0.510956	0.463133	0.513645	0.478663
	499.773	0.639107	0.495815	0.474098	0.499093	0.485866
	501.77	0.880164	0.533543	0.487104	0.479787	0.454192
	503.771	0.766045	0.481376	0.476447	0.500723	0.495625
	505.773	0.570625	0.527791	0.466379	0.513384	0.520334
	507.772	0.481222	0.545474	0.509237	0.542806	0.518676
	509.771	0.465968	0.52776	0.495751	0.518749	0.500296
	511.772	0.428146	0.510102	0.455776	0.521577	0.476332
	513.77	0.465703	0.519244	0.467913	0.525346	0.512123
	515.774	0.473613	0.531546	0.45203	0.521692	0.5272
	517.774	0.42825	0.543599	0.449164	0.555139	0.490213
	519.772	0.435717	0.539703	0.441836	0.638019	0.506846
	521.774	0.429049	0.536073	0.461886	0.687551	0.504986
	523.773	0.448101	0.52399	0.477867	0.684108	0.507401
	525.773	0.439133	0.526989	0.461895	0.684082	0.514562
	527.773	0.455269	0.557258	0.488241	0.69419	0.481313
	529.774	0.420339	0.552076	0.463977	0.656757	0.509897
	531.772	0.455151	0.543922	0.475008	0.649902	0.48487
	533.771	0.469139	0.523745	0.466227	0.639317	0.476103
	535.774	0.458729	0.542441	0.475907	0.59221	0.500674
	537.772	0.455553	0.576092	0.463773	0.534137	0.508701
	539.775	0.474958	0.529415	0.468379	0.521849	0.506625
	541.77	0.429007	0.530976	0.461845	0.517372	0.516787
	543.773	0.457919	0.609314	0.434301	0.502369	0.520132
	545.77	0.436055	0.640787	0.469806	0.485686	0.499531
	547.772	0.443133	0.637851	0.456227	0.469755	0.495595
	549.773	0.48048	0.725532	0.469888	0.478223	0.511788
	551.776	0.523072	0.825029	0.457057	0.484952	0.533999
	553.775	0.516609	0.740061	0.461213	0.491384	0.535398
	555.771	0.498833	0.654776	0.488213	0.488739	0.505675
	557.771	0.501162	0.578664	0.470175	0.466398	0.520588
	559.773	0.56816	0.563028	0.482698	0.472062	0.504587
	561.771	0.522436	0.550156	0.510606	0.495173	0.536646
	563.774	0.471479	0.558314	0.623016	0.469083	0.514074
	565.771	0.529815	0.545999	0.96976	0.46049	0.522587
	567.774	0.511702	0.536918	0.982938	0.474349	0.614002
	569.771	0.815597	0.547749	0.712359	0.493439	0.996433
	571.773	1.01794	0.529008	0.544871	0.4947	0.811432
	573.773	0.774	0.525615	0.468187	0.472025	0.61337
	575.771	0.505527	0.53969	0.457743	0.489887	0.572779
	577.771	0.452649	0.523534	0.450065	0.483112	0.492528
	579.774	0.452714	0.521173	0.466767	0.464261	0.490645
	581.771	0.419208	0.497575	0.467501	0.473553	0.498431
	583.775	0.481533	0.548121	0.453694	0.475461	0.497129
	585.773	0.439322	0.516063	0.436151	0.482682	0.457164
	587.774	0.420718	0.525644	0.450891	0.490428	0.492328
	589.773	0.462876	0.550552	0.467869	0.518469	0.480394
	591.774	0.423992	0.502944	0.441096	0.487573	0.476702
	593.772	0.460519	0.507644	0.470393	0.513078	0.484196
	595.772	0.468752	0.526179	0.483329	0.545101	0.483967
	597.775	0.444387	0.504639	0.488933	0.654405	0.495315
	599.773	0.47752	0.523154	0.487199	0.666651	0.495523
Figure 2K
	WT A20	Orai1 KO #4	Orai3 KO #2	O1/O3 DKO #7
	33	24	25	8
	33	18	18	11
	36	8	19	9
	28	20	19	5
	25	24	13	4
	32	12	20	11
	32	10	34	7
	33	28	3	12
	29	8	3	2
	21	11	9	16
	3	20	7	11
	34	18	11	8
	26	22	24	2
	22	7	12	3
	20	22	16	3
	25	4	28	6
	23	29	28	2
	4	14	22	2
	5	25	19	5
	9	14	33	9
	29	26	19	1
	36	9	10	5
	24	35	13	2
	11	28	20	6
	6	17	33	8
	25	13	19	5
	12	21	4	9
	18	22	11	17
	30	27	38	7
	31	35	11	12
	11	14	13	8
	28	19	16	5
	25	13	27	5
	5	13	2	2
	10	30	19	7
	21	25	22	9
	21	19	35	3
	13	21	10	18
	32	22	24	1
	33	18	5	8
	7	10	36	3
	27	2	9	14
	23	19	24	6
	28	13	5	8
	3	12	26	19
	16	11	21	1
	24	5	22	13
	13	24	14	3
	22	15	16	4
	37	8	32	2
	20	6	9	11
	37	19	23	15
	30	19	3	19
	11	18	26	14
	8	30	2	6
	28	18	17	11
	17	30	4	4
	21	24	2	8
	29	19	7	3
	20	29	28	6
	31	16	14	15
	27	17	2	11
	8	9	5	12
	18	10	34	11
	35	15	4	8
	33	18	17	7
	19	25	32	5
	28	26	26	6
	20	32	4	7
	17	25	30	4
	24	4	21	5
	33	22	25	4
	29	18	10	4
	35	17	29	3
	20	14	4	24
	22	11	9	3
		28	31	2
		4	30	5
		10	3
[truncated: 338 more columns]
