# Supplementary material for: Orai3 and Orai1 mediate CRAC channel function and metabolic reprogramming in B cells
Source: eLife. 2023 Feb 21;12:e84708. doi: 10.7554/eLife.84708 (PMC9998091; doi:10.7554/eLife.84708)
Supplement: Figure 3—figure supplement 1—source data 1. [file elife-84708-fig3-figsupp1-data1.xlsx]

## Sheet: Sheet1
Figure 3 - Figure Supplement 1B
	B cells	CD4+ T cells	CD8+ T cells
	9058	7841	9463
	8599	7364	8920
	10039	9057	10621
	9666	8708	10205
	8256	7140	8642
	8903	7736	9263
	9593	8744	9606
	9873	8945	10024
Figure 3 - Figure Supplement 1E		Mb1cre/+			Orai1fl/flMb1cre/+
	Unstimulated	1769	1775	1813	1944	1920	1862
	IgM	7981	7778	7851	8164	8004	8321
	CD40	3626	3615	3269	3393	3233	3261
	IgM/CD40	8109	8064	7961	8579	8552	8556
	LPS	7057	7227	6992	7821	7905	7653
Figure 3 - Figure Supplement 1H
		Mb1cre/+			Orai1fl/flMb1cre/+
	Unstimulated	120	121	123	105	102	103
	IgM	6184	6143	6069	4484	4686	4965
	CD40	307	309	282	240	233	243
	IgM/CD40	7558	7835	7509	6446	6174	6300
	LPS	4228	4079	3983	4007	3886	3897
