# Supplementary material for: Orai3 and Orai1 mediate CRAC channel function and metabolic reprogramming in B cells
Source: eLife. 2023 Feb 21;12:e84708. doi: 10.7554/eLife.84708 (PMC9998091; doi:10.7554/eLife.84708)
Supplement: Figure 3—source data 1. [file elife-84708-fig3-data1.xlsx]

## Sheet: Sheet1
Figure 3B
	Orai1fl/fl	Orai1fl/fl; Mb1Cre/+
	229	74
	227	75
	218	71
	208	69
Figure 3C
	Mb1cre/+	Orai1fl/flMb1cre/+
	1.17438	0.038248
	0.887601	0.0304087
	0.851282	0.0262962
	1.05385	0.0401213
	1.18027	0.0254878
	1.04685	0.0329327
Figure 3D
	Mb1cre/+	Orai1fl/flMb1cre/+
	0.459451	0.463314
	0.415655	0.476208
	0.410567	0.453641
	0.500124	0.512415
	0.498766	0.457212
	0.468067	0.490102
Figure 3E
	Mb1cre/+	Orai1fl/flMb1cre/+
	0.784418	0.906095
	0.813967	0.986355
	0.855873	0.973899
	1.01366	0.948739
	0.911276	0.919101
	1.00796	0.877965
Figure 3F
	Time (Min)	Mb1Cre/+
	0	0.406001	0.456654	0.397385	0.388476	0.452049	0.384532	0.445557	0.396564	0.436946	0.406903	0.458699	0.446819	0.398718	0.412322	0.409553	0.395861	0.438403	0.4316	0.403761	0.437912	0.421734	0.387313	0.408353	0.412993	0.445386	0.396154	0.501874	0.592045	0.407853	0.471737	0.408137	0.38541	0.399933	0.391593	0.377698	0.41402	0.428198	0.432708	0.982961	0.511058	0.447891	0.384745	0.439383	0.414133	0.416052	0.423103	0.412581	0.391065
	0.029683	0.402094	0.443134	0.405084	0.4019	0.431529	0.384165	0.437338	0.403604	0.419666	0.441147	0.501688	0.409802	0.407927	0.427857	0.38945	0.386625	0.449132	0.432846	0.404598	0.439838	0.42658	0.41386	0.403191	0.393972	0.444563	0.420421	0.483779	0.586059	0.407614	0.435843	0.413643	0.373012	0.405489	0.395076	0.376661	0.402494	0.411736	0.446949	1.04634	0.495624	0.449719	0.40025	0.452594	0.407137	0.391913	0.401785	0.410674	0.361828
	0.062933	0.402194	0.443568	0.400146	0.375081	0.431347	0.37859	0.440531	0.386295	0.408751	0.410957	0.554214	0.397506	0.41303	0.393685	0.390958	0.388399	0.45912	0.429767	0.393802	0.439689	0.401518	0.390945	0.406817	0.407242	0.417458	0.40149	0.494575	0.555754	0.396161	0.43714	0.394624	0.379057	0.381897	0.384049	0.384336	0.391334	0.396976	0.43992	1.03266	0.519358	0.430619	0.387585	0.443448	0.383385	0.395793	0.404518	0.413546	0.378657
	0.096317	0.403045	0.441199	0.40067	0.386032	0.422868	0.387574	0.427631	0.399639	0.417883	0.416772	0.83496	0.410106	0.400659	0.407415	0.381247	0.380284	0.417371	0.429719	0.381942	0.428897	0.421046	0.394698	0.39528	0.392399	0.451805	0.405418	0.477001	0.548369	0.398362	0.45499	0.40322	0.37983	0.395803	0.396811	0.368455	0.389773	0.400472	0.448201	1.08021	0.518699	0.435619	0.405463	0.446354	0.398158	0.415152	0.420927	0.405873	0.377407
	0.12965	0.401561	0.465384	0.407182	0.390395	0.431329	0.371837	0.429684	0.399138	0.443316	0.429162	0.911134	0.421421	0.406392	0.427975	0.393666	0.398126	0.441346	0.443522	0.403566	0.436427	0.420689	0.40379	0.40515	0.391235	0.447204	0.39624	0.476903	0.534262	0.404937	0.445271	0.39158	0.389358	0.392756	0.383007	0.387053	0.402272	0.402938	0.447206	1.19748	0.501809	0.41655	0.400015	0.441208	0.414639	0.429462	0.414437	0.412975	0.374386
	0.163017	0.399888	0.453883	0.378736	0.392904	0.432627	0.375903	0.439867	0.379294	0.440448	0.411507	0.797514	0.421774	0.397153	0.416997	0.380828	0.394454	0.433708	0.443122	0.388313	0.418955	0.415044	0.395077	0.401802	0.386834	0.433889	0.416081	0.492338	0.511633	0.397072	0.45544	0.40124	0.387569	0.399926	0.397312	0.389719	0.398081	0.402573	0.452956	1.17886	0.526667	0.434278	0.386927	0.427595	0.39883	0.398794	0.417821	0.405936	0.372632
	0.196317	0.381979	0.450772	0.405611	0.400326	0.413877	0.368359	0.415633	0.405305	0.415299	0.410553	0.667948	0.40718	0.401594	0.420547	0.373815	0.401787	0.4542	0.463519	0.383953	0.426386	0.413904	0.378868	0.420054	0.392793	0.425773	0.409786	0.485775	0.521264	0.404587	0.444798	0.408742	0.370109	0.38725	0.399072	0.386346	0.399672	0.39176	0.450979	1.00311	0.4799	0.444784	0.397626	0.461081	0.401469	0.426862	0.396551	0.436905	0.391306
	0.2296	0.401987	0.457277	0.388249	0.388024	0.410326	0.39232	0.414008	0.387925	0.437868	0.412402	0.604485	0.423959	0.435356	0.403199	0.381405	0.39945	0.445419	0.427993	0.390334	0.426021	0.42428	0.391782	0.414265	0.396305	0.437546	0.38851	0.48685	0.515462	0.401692	0.444604	0.400256	0.369118	0.406785	0.387042	0.394157	0.413449	0.411261	0.434586	0.924378	0.48671	0.442199	0.406086	0.438178	0.387457	0.397255	0.410648	0.423801	0.38342
	0.262967	0.418771	0.444225	0.399148	0.386387	0.41509	0.372159	0.412123	0.411994	0.417881	0.403626	0.551714	0.415235	0.417829	0.422722	0.388568	0.440335	0.438648	0.478595	0.400083	0.426205	0.398634	0.402411	0.422023	0.40324	0.437929	0.423322	0.475493	0.506563	0.397342	0.439531	0.40483	0.375296	0.405399	0.393013	0.397237	0.417989	0.406341	0.46253	0.825333	0.488055	0.447431	0.385034	0.45257	0.403626	0.399734	0.400221	0.412202	0.395111
	0.296333	0.41163	0.436758	0.384467	0.395928	0.416731	0.376874	0.421816	0.39	0.403441	0.393018	0.49797	0.408192	0.422857	0.408031	0.383462	0.4128	0.427435	0.473377	0.393881	0.444414	0.398053	0.399797	0.419231	0.392912	0.417834	0.406297	0.488077	0.49222	0.401708	0.438478	0.391758	0.38492	0.3916	0.402613	0.362084	0.410709	0.399438	0.462103	0.700184	0.465009	0.448466	0.400212	0.439483	0.395036	0.410648	0.411527	0.4337	0.38811
	0.32965	0.432129	0.450996	0.404182	0.397212	0.399545	0.411968	0.432075	0.403882	0.421996	0.408013	0.508645	0.411719	0.410674	0.416619	0.383775	0.41478	0.439936	0.490682	0.414982	0.432604	0.416767	0.396924	0.438737	0.388928	0.441457	0.424116	0.50711	0.496546	0.419833	0.456738	0.40178	0.374666	0.393083	0.393808	0.388534	0.417254	0.393224	0.460543	0.675971	0.466758	0.442208	0.411164	0.439587	0.407571	0.4082	0.417479	0.410599	0.399446
	0.362983	0.402808	0.451454	0.401968	0.403027	0.420779	0.404527	0.409539	0.408451	0.416974	0.4097	0.468045	0.428577	0.428465	0.413254	0.385595	0.431324	0.43611	0.446911	0.401368	0.447891	0.410918	0.40846	0.452336	0.403838	0.438067	0.43129	0.498176	0.481725	0.394163	0.449354	0.41259	0.376753	0.407214	0.394366	0.390496	0.405379	0.409047	0.483573	0.603676	0.479058	0.440747	0.393596	0.459232	0.395725	0.420329	0.402884	0.414946	0.391244
	0.396317	0.406775	0.47418	0.398117	0.386939	0.41842	0.38239	0.410509	0.390069	0.418915	0.41807	0.46465	0.415759	0.402899	0.413872	0.378867	0.427277	0.435801	0.490693	0.40195	0.420129	0.415182	0.398375	0.455309	0.395416	0.43615	0.429285	0.471491	0.476756	0.400409	0.437277	0.39878	0.374144	0.402403	0.384658	0.384161	0.415381	0.393221	0.47823	0.591525	0.464523	0.452915	0.391951	0.440749	0.406349	0.385736	0.399005	0.427341	0.404517
	0.42965	0.403511	0.446578	0.405065	0.387078	0.437179	0.373032	0.403062	0.3953	0.433242	0.41595	0.466863	0.427799	0.390449	0.420114	0.383601	0.412647	0.415082	0.46217	0.406206	0.437281	0.417138	0.387481	0.475138	0.400342	0.440554	0.400562	0.488272	0.484403	0.40834	0.440616	0.406876	0.378617	0.40002	0.388689	0.40045	0.39824	0.390371	0.476577	0.583006	0.453945	0.435261	0.381253	0.448137	0.404754	0.388213	0.403392	0.422066	0.398076
	0.462983	0.419612	0.444555	0.395184	0.394549	0.425883	0.36862	0.410326	0.405763	0.420482	0.42214	0.441894	0.413751	0.403813	0.425292	0.384255	0.427041	0.422002	0.468032	0.399779	0.419452	0.421912	0.40133	0.467909	0.411297	0.432324	0.415011	0.488169	0.469151	0.396306	0.427031	0.404191	0.373587	0.397883	0.382883	0.3998	0.396866	0.420889	0.476424	0.568452	0.437885	0.437133	0.380938	0.4508	0.403504	0.411117	0.398951	0.416214	0.373818
	0.4963	0.397975	0.443343	0.408495	0.382278	0.407177	0.373475	0.394329	0.376657	0.380466	0.404101	0.471931	0.400634	0.399902	0.417498	0.379753	0.437296	0.409105	0.452885	0.408835	0.403129	0.402772	0.393494	0.495937	0.38647	0.427489	0.432109	0.467538	0.458099	0.394163	0.428312	0.403777	0.371957	0.39803	0.390746	0.368893	0.404149	0.39917	0.483307	0.577767	0.430322	0.421544	0.377622	0.443543	0.393389	0.386139	0.398994	0.409752	0.378936
	0.529617	0.417727	0.463611	0.401919	0.419779	0.425749	0.372537	0.407801	0.394172	0.418492	0.403463	0.460792	0.43971	0.396033	0.416882	0.383304	0.432176	0.418291	0.485507	0.394821	0.44205	0.402036	0.399974	0.509403	0.413694	0.4331	0.403886	0.483672	0.460799	0.397094	0.42935	0.404837	0.380698	0.408375	0.390364	0.383081	0.399438	0.405593	0.488174	0.535624	0.452069	0.444138	0.394369	0.447544	0.391553	0.390384	0.410708	0.432021	0.389218
	0.562983	0.405577	0.451021	0.411466	0.393692	0.4217	0.370412	0.401236	0.396333	0.413627	0.408774	0.459352	0.419351	0.398778	0.408888	0.382115	0.426364	0.450739	0.482885	0.421689	0.422795	0.417271	0.383911	0.506671	0.398555	0.416283	0.416638	0.48899	0.47796	0.392464	0.428325	0.40729	0.386078	0.389867	0.400817	0.386819	0.389646	0.396318	0.492143	0.534217	0.460799	0.446797	0.398694	0.442611	0.418279	0.398695	0.409886	0.401017	0.368683
	0.596317	0.404058	0.464602	0.415044	0.398628	0.393806	0.379502	0.396452	0.387537	0.40435	0.428629	0.422035	0.419909	0.406641	0.419739	0.386945	0.411383	0.42876	0.485732	0.376445	0.432153	0.409972	0.401521	0.487714	0.403066	0.42797	0.395917	0.484467	0.44803	0.393407	0.417003	0.401059	0.375205	0.389778	0.39322	0.377267	0.403686	0.403729	0.46834	0.486765	0.455666	0.440068	0.390327	0.446767	0.390539	0.41416	0.403863	0.412729	0.39958
	0.62965	0.403979	0.466838	0.407771	0.398922	0.421389	0.375084	0.3977	0.396501	0.424914	0.418875	0.43202	0.433223	0.396601	0.428293	0.388911	0.420673	0.439104	0.456201	0.400068	0.453265	0.418017	0.392787	0.475456	0.403394	0.445912	0.391481	0.481705	0.484818	0.40344	0.443002	0.400777	0.375528	0.398684	0.386696	0.372854	0.394104	0.417891	0.483681	0.468568	0.464222	0.437086	0.396723	0.437864	0.40402	0.39765	0.39754	0.430518	0.396187
	0.662967	0.393717	0.441508	0.39143	0.38648	0.398693	0.368722	0.399152	0.378848	0.426348	0.412235	0.452048	0.400416	0.392777	0.426815	0.378516	0.405655	0.427106	0.455714	0.407787	0.432104	0.404707	0.390124	0.470191	0.39732	0.419936	0.416548	0.457048	0.4828	0.411639	0.441895	0.4033	0.384644	0.395872	0.37759	0.389426	0.387683	0.411891	0.479275	0.449431	0.433111	0.450942	0.38845	0.455255	0.409707	0.392695	0.400975	0.412263	0.372084
	0.696283	0.425104	0.432532	0.40199	0.397615	0.425324	0.395582	0.395175	0.395338	0.420692	0.413459	0.432343	0.413522	0.388283	0.438988	0.384115	0.420127	0.423746	0.492927	0.395663	0.436602	0.404916	0.385861	0.47267	0.40488	0.452794	0.412108	0.467751	0.48494	0.417325	0.428782	0.397422	0.381713	0.384972	0.375101	0.408831	0.386824	0.414161	0.463183	0.448499	0.426679	0.429149	0.407191	0.443962	0.39187	0.390906	0.403818	0.418507	0.391766
	0.7296	0.412453	0.446915	0.406943	0.39261	0.415258	0.38993	0.38724	0.390473	0.408976	0.430547	0.42992	0.420818	0.411405	0.424091	0.387673	0.393628	0.421862	0.481497	0.388527	0.436737	0.401539	0.385176	0.453342	0.403695	0.428793	0.414154	0.471937	0.488929	0.391991	0.43204	0.40341	0.384649	0.385245	0.397239	0.395097	0.40148	0.3954	0.451498	0.429533	0.460059	0.427074	0.398789	0.447138	0.381114	0.39365	0.411103	0.412426	0.3878
	0.762983	0.434859	0.456097	0.417073	0.38926	0.428663	0.387467	0.398164	0.400684	0.412083	0.431476	0.43463	0.415689	0.403479	0.420441	0.370636	0.394159	0.433349	0.484446	0.394264	0.441439	0.392725	0.388337	0.443236	0.397497	0.44794	0.400051	0.495165	0.470712	0.397578	0.415439	0.404337	0.367571	0.393004	0.373004	0.393652	0.391866	0.388056	0.466397	0.438975	0.443289	0.43842	0.391668	0.444944	0.400207	0.396717	0.392235	0.401452	0.372975
	0.796283	0.432187	0.446065	0.393577	0.394041	0.407379	0.386106	0.402602	0.391309	0.391452	0.431096	0.436259	0.434716	0.391228	0.411309	0.400436	0.397627	0.408849	0.480851	0.393037	0.447443	0.388621	0.39526	0.440399	0.394179	0.444651	0.393885	0.51331	0.479518	0.392591	0.436049	0.390677	0.367014	0.388486	0.383889	0.397753	0.404361	0.398258	0.452882	0.406879	0.444111	0.42216	0.381978	0.444546	0.411836	0.39449	0.440005	0.430749	0.364053
	0.8296	0.419376	0.456251	0.415885	0.400767	0.409594	0.371256	0.387793	0.405055	0.397344	0.408417	0.453302	0.414983	0.408457	0.421212	0.389281	0.411516	0.452291	0.503615	0.406407	0.480748	0.411286	0.393855	0.449167	0.408051	0.43977	0.418195	0.486971	0.469224	0.398101	0.434981	0.396871	0.387837	0.396692	0.394173	0.406713	0.414761	0.389289	0.453336	0.430459	0.449488	0.439898	0.402758	0.456313	0.406675	0.433362	0.446014	0.413219	0.406903
	0.862967	0.435445	0.459945	0.396634	0.404981	0.403738	0.378249	0.402968	0.408379	0.414878	0.423081	0.445075	0.41942	0.416823	0.43549	0.380552	0.39521	0.431585	0.514783	0.417254	0.472703	0.417102	0.401386	0.494813	0.393077	0.434028	0.43224	0.483307	0.468057	0.404071	0.429643	0.391176	0.37975	0.399373	0.404177	0.39398	0.395848	0.398255	0.445212	0.413148	0.451126	0.447652	0.391227	0.464606	0.407524	0.384663	0.435859	0.430406	0.369672
	0.89625	0.414044	0.464042	0.399707	0.414784	0.397574	0.384298	0.385158	0.388996	0.40788	0.454774	0.432154	0.426865	0.415879	0.423369	0.376755	0.406041	0.431457	0.509306	0.398737	0.46496	0.40173	0.402131	0.520623	0.398805	0.449611	0.406158	0.491055	0.456772	0.397572	0.442428	0.399797	0.381885	0.380638	0.390248	0.389609	0.393739	0.392261	0.44301	0.421728	0.455553	0.447469	0.394602	0.446051	0.374703	0.389996	0.462732	0.403072	0.371394
	0.9296	0.426145	0.479477	0.405376	0.403263	0.413739	0.392567	0.389346	0.395505	0.442577	0.433408	0.441316	0.428272	0.412309	0.412949	0.386355	0.417737	0.407804	0.524923	0.391634	0.486353	0.400768	0.401919	0.51928	0.417926	0.448596	0.405086	0.500266	0.455871	0.403472	0.436711	0.404282	0.376981	0.400839	0.389117	0.387856	0.39723	0.408318	0.45664	0.41379	0.444416	0.444022	0.402633	0.445718	0.403918	0.411796	0.481291	0.428481	0.396114
	0.962933	0.402639	0.469518	0.400651	0.384727	0.386391	0.39295	0.401067	0.386614	0.406379	0.431621	0.426008	0.420736	0.419618	0.409363	0.387955	0.404341	0.424001	0.530976	0.394463	0.473958	0.413984	0.407941	0.516602	0.384152	0.452913	0.443668	0.487452	0.442286	0.40974	0.438134	0.407499	0.377137	0.389412	0.375743	0.391442	0.414153	0.407245	0.431653	0.407197	0.480843	0.432503	0.392083	0.467464	0.392553	0.394041	0.555974	0.414797	0.387433
	0.996267	0.405844	0.435291	0.410751	0.382724	0.406855	0.381473	0.411617	0.382884	0.403803	0.435245	0.42414	0.396148	0.401168	0.393324	0.375569	0.405729	0.431652	0.507956	0.395735	0.471497	0.416397	0.396254	0.584456	0.404645	0.442946	0.365269	0.465133	0.446551	0.404917	0.426768	0.399536	0.366547	0.39137	0.376464	0.393521	0.374819	0.395725	0.434942	0.420868	0.448956	0.434233	0.390226	0.466548	0.38252	0.390453	0.995149	0.412732	0.366893
	1.02962	0.409513	0.42732	0.389952	0.393077	0.404403	0.367213	0.392198	0.392029	0.410712	0.446706	0.440672	0.417354	0.396189	0.409801	0.382932	0.389371	0.403318	0.493498	0.38281	0.444806	0.41315	0.395261	0.684655	0.40347	0.461151	0.43251	0.484952	0.466936	0.417938	0.434115	0.357819	0.408157	0.407733	0.383892	0.391297	0.387131	0.398243	0.447576	0.408413	0.431895	0.430832	0.373789	0.457899	0.379016	0.391773	0.825999	0.421221	0.381137
	1.06295	0.358295	0.438405	0.375533	0.372686	0.386317	0.343136	0.347139	0.3491	0.363932	0.366744	0.390639	0.366122	0.384322	0.369462	0.349631	0.374617	0.414656	0.524077	0.374889	0.39555	0.371182	0.362745	0.636509	0.362472	0.414965	0.337825	0.4132	0.413682	0.380613	0.389813	0.350955	0.345333	0.366778	0.335747	0.365941	0.358648	0.37384	0.407458	0.418904	0.384059	0.412049	0.345946	0.429321	0.387509	0.377408	0.682136	0.419602	0.353949
	1.0963	0.41271	0.418949	0.386435	0.386998	0.397713	0.363318	0.406994	0.390397	0.408097	0.431052	0.429799	0.398951	0.414015	0.397359	0.377094	0.391708	0.418747	0.522594	0.411047	0.441172	0.397539	0.409237	0.693216	0.381984	0.449466	0.396212	0.494671	0.441456	0.418218	0.429698	0.395906	0.368688	0.393202	0.373749	0.384822	0.386575	0.407603	0.435551	1.09953	0.434984	0.444076	0.392675	0.446712	0.380679	0.390158	0.620483	0.408881	0.353128
	1.12963	0.404502	0.426259	0.399073	0.390219	0.390968	0.360137	0.385398	0.387065	0.402188	0.399972	0.456124	0.414303	0.400809	0.394398	0.378365	0.386719	0.401917	0.53523	0.406354	0.449907	0.401448	0.397545	0.659697	0.400998	0.42434	0.393567	0.44877	0.433452	0.388597	0.425499	0.411865	0.361155	0.396378	0.385725	0.396658	0.415562	0.381835	0.433786	1.08688	0.44328	0.425982	0.410587	0.458491	0.406242	0.392733	0.621049	0.42398	0.38004
	1.16297	0.396158	0.43086	0.390467	0.387276	0.394267	0.382606	0.398892	0.377217	0.41939	0.409837	0.44397	0.4151	0.41448	0.402014	0.376655	0.395653	0.407361	0.533502	0.374199	0.471185	0.41335	0.404898	0.608586	0.386436	0.421144	0.396155	0.454776	0.424764	0.402848	0.424927	0.386213	0.361441	0.397533	0.374676	0.376186	0.392737	0.403981	0.428286	0.898225	0.43591	0.423461	0.381473	0.464654	0.390803	0.408911	0.628468	0.410031	0.365702
	1.1963	0.405348	0.430514	0.383224	0.40118	0.384732	0.398237	0.429414	0.403363	0.393526	0.41719	0.445745	0.419144	0.405211	0.402658	0.397837	0.387321	0.406472	0.529738	0.40237	0.481367	0.391047	0.382881	0.578488	0.403897	0.432875	0.388409	0.464814	0.426652	0.403564	0.433637	0.403512	0.373351	0.403114	0.381577	0.365382	0.403117	0.394934	0.433181	0.804607	0.456747	0.443733	0.405505	0.436173	0.393205	0.375784	0.641257	0.421802	0.374285
	1.22963	0.399679	0.446854	0.383146	0.39339	0.414811	0.390532	0.457344	0.385155	0.390056	0.413816	0.450916	0.409385	0.39929	0.417948	0.399408	0.386348	0.394044	0.526358	0.403736	0.449586	0.403211	0.381448	0.521959	0.393365	0.444631	0.397802	0.449388	0.424361	0.393329	0.429427	0.386966	0.376695	0.393987	0.382214	0.362508	0.391834	0.382989	0.44718	0.848785	0.430253	0.429013	0.394478	0.453878	0.385924	0.37076	0.69755	0.434642	0.370804
	1.26297	0.431161	0.454039	0.387378	0.387699	0.390954	0.381646	0.641015	0.393884	0.424489	0.412464	0.441141	0.411632	0.400794	0.395029	0.394488	0.414948	0.400748	0.522067	0.390043	0.460553	0.409408	0.390144	0.492481	0.403299	0.42935	0.389965	0.439299	0.416837	0.40719	0.407543	0.38287	0.382439	0.391664	0.374672	0.378837	0.377942	0.399059	0.426921	0.799806	0.449807	0.432202	0.399565	0.454947	0.400043	0.389146	0.814407	0.405115	0.380289
	1.2963	0.426287	0.441826	0.404288	0.395896	0.387051	0.386472	0.848847	0.39333	0.425079	0.393685	0.420073	0.401641	0.402856	0.410143	0.394637	0.380429	0.408058	0.506763	0.394773	0.445704	0.393526	0.380933	0.48121	0.401013	0.444893	0.395734	0.438021	0.425383	0.399782	0.421877	0.40184	0.368926	0.392563	0.379546	0.385499	0.386248	0.393245	0.434995	0.728357	0.449135	0.435993	0.397405	0.434598	0.384488	0.362847	0.648645	0.414209	0.372889
	1.32968	0.395915	0.425524	0.406703	0.408347	0.38722	0.379746	0.789204	0.389869	0.417653	0.410308	0.435086	0.407616	0.392826	0.395206	0.398578	0.391949	0.393646	0.524513	0.405733	0.432024	0.390512	0.395765	0.465462	0.417262	0.412458	0.390599	0.473455	0.415052	0.397861	0.432076	0.395161	0.379205	0.382153	0.390039	0.369007	0.387527	0.400085	0.443609	0.767633	0.453	0.428031	0.371038	0.437837	0.39418	0.398865	0.590221	0.430796	0.395243
	1.36297	0.377326	0.445446	0.399851	0.404084	0.390035	0.390674	0.659883	0.394372	0.407207	0.392353	0.417871	0.422899	0.389849	0.404292	0.400392	0.388699	0.420941	0.525177	0.371501	0.424242	0.391392	0.385204	0.471495	0.438251	0.448639	0.392422	0.44259	0.411404	0.397176	0.43263	0.389722	0.367692	0.383871	0.384813	0.380452	0.387545	0.402661	0.441943	0.822088	0.468948	0.443216	0.374272	0.44087	0.393736	0.379746	0.539202	0.436263	0.386149
	1.39625	0.382309	0.448385	0.390387	0.388877	0.386829	0.352925	0.637876	0.380245	0.410675	0.405849	0.422581	0.401423	0.405342	0.402402	0.399155	0.387253	0.381004	0.49325	0.396035	0.45023	0.406333	0.381967	0.464383	0.451614	0.429194	0.396001	0.447503	0.429948	0.393966	0.43452	0.408476	0.388173	0.392169	0.37598	0.377082	0.382388	0.413613	0.436557	0.801697	0.494915	0.436086	0.39443	0.447782	0.393739	0.395737	0.508611	0.423006	0.36448
	1.42962	0.396933	0.433579	0.408636	0.399242	0.381828	0.353459	0.602623	0.380011	0.412633	0.421012	0.442874	0.413102	0.390744	0.397849	0.387454	0.394296	0.421351	0.509169	0.398013	0.44392	0.386679	0.367271	0.440546	0.453411	0.443495	0.388157	0.458866	0.418859	0.408411	0.42169	0.399569	0.382007	0.402612	0.367289	0.384662	0.386742	0.407733	0.436807	0.722954	0.505797	0.438349	0.376569	0.441294	0.401515	0.387225	0.474057	0.446439	0.377275
	1.46295	0.371073	0.445238	0.452234	0.386727	0.403658	0.372541	0.556361	0.381635	0.41119	0.411215	0.479922	0.42028	0.380934	0.401083	0.388915	0.390568	0.405455	0.504163	0.387815	0.428107	0.403492	0.400649	0.429716	0.468008	0.434107	0.388699	0.467938	0.417179	0.399292	0.436998	0.415855	0.375612	0.384872	0.383064	0.369509	0.394862	0.420748	0.430676	0.749232	0.521827	0.433238	0.387545	0.435459	0.372607	0.379587	0.540991	0.429125	0.367386
	1.49628	0.409229	0.447848	0.448325	0.375929	0.391273	0.377111	0.529989	0.364496	0.40586	0.417011	0.48371	0.404559	0.38286	0.412549	0.378538	0.387233	0.398956	0.51927	0.385565	0.442557	0.399822	0.373927	0.428177	0.423522	0.455013	0.381421	0.497181	0.41146	0.388492	0.420709	0.397123	0.367136	0.399684	0.381655	0.384664	0.380874	0.447559	0.424373	0.739806	0.509217	0.439473	0.373615	0.450095	0.377678	0.376316	0.555864	0.4174	0.398458
	1.5296	0.37473	0.450604	0.450394	0.374435	0.38539	0.393195	0.532	0.381331	0.404916	0.418305	0.530548	0.42269	0.391096	0.401325	0.380141	0.387897	0.400127	0.504996	0.397814	0.425983	0.405559	0.381353	0.423016	0.419114	0.448308	0.384438	0.53429	0.408968	0.384371	0.415671	0.406272	0.377286	0.385057	0.383928	0.392214	0.389465	0.445519	0.425064	0.670575	0.499309	0.441007	0.372752	0.434094	0.383888	0.376638	0.748185	0.412574	0.369263
	1.5629	0.399649	0.432026	0.470987	0.390344	0.381139	0.41061	0.545529	0.370327	0.410052	0.42254	1.00703	0.400148	0.380419	0.392134	0.368973	0.382075	0.392667	0.505468	0.380305	0.440423	0.401384	0.375717	0.424193	0.411032	0.423455	0.393349	0.603948	0.414831	0.378765	0.418804	0.39	0.378976	0.380407	0.371841	0.3654	0.388956	0.451326	0.422905	0.632201	0.498006	0.419849	0.386887	0.417971	0.385027	0.398343	0.680701	0.417073	0.354204
	1.59628	0.424943	0.438471	0.472883	0.39896	0.391486	0.470172	0.549866	0.386132	0.396644	0.425092	1.00341	0.41992	0.406923	0.398506	0.378797	0.410044	0.392461	0.493026	0.390583	0.437721	0.400741	0.37758	0.403508	0.409799	0.445639	0.38945	0.873123	0.4131	0.412893	0.420722	0.406724	0.364208	0.409155	0.37297	0.376473	0.394209	0.452402	0.429204	0.61695	0.491734	0.437979	0.38015	0.446241	0.393249	0.392776	0.643303	0.422649	0.367007
	1.62962	0.379596	0.451596	0.512137	0.379207	0.392837	1.29875	0.51062	0.381062	0.40395	0.451022	0.864741	0.459902	0.397993	0.396464	0.377117	0.423567	0.420435	0.49705	0.394379	0.434197	0.404876	0.383063	0.410052	0.415335	0.458516	0.397004	0.758017	0.414118	0.399536	0.418344	0.394011	0.375267	0.408803	0.390041	0.380746	0.391115	0.448441	0.431507	0.688799	0.484418	0.433677	0.365749	0.448969	0.392194	0.399585	0.610022	0.424626	0.375707
	1.66295	0.381362	0.419616	0.654693	0.40206	0.3834	1.14456	0.462582	0.374174	0.420382	0.464813	0.764715	0.461544	0.405235	0.395786	0.380678	0.417659	0.40976	0.465888	0.375551	0.43203	0.394666	0.367855	0.405948	0.401934	0.443157	0.386821	0.65474	0.405359	0.388487	0.407446	0.395766	0.377061	0.413214	0.390821	0.366736	0.374983	0.429557	0.437629	1.24955	0.453447	0.421119	0.376088	0.44551	0.39035	0.379732	0.561257	0.427649	0.377768
	1.69628	0.37717	0.447411	0.620314	0.404763	0.382076	0.923733	0.459752	0.375347	0.412423	0.454016	0.673229	0.494246	0.400288	0.392489	0.364415	0.450051	0.407706	0.484362	0.388244	0.45191	0.39603	0.413809	0.397732	0.417202	0.434138	0.389157	0.633343	0.412081	0.390501	0.424629	0.390239	0.379342	0.425701	0.382267	0.367329	0.393363	0.429455	0.433037	1.30455	0.43539	0.441383	0.383349	0.450237	0.390373	0.400621	0.544512	0.425039	0.379675
	1.72962	0.395644	0.435157	0.584852	0.405566	0.400858	0.785077	0.436601	0.378508	0.415429	0.44751	0.598229	0.529575	0.387104	0.408719	0.374672	0.412211	0.395079	0.47538	0.391459	0.451316	0.385413	0.380913	0.389135	0.401875	0.436876	0.38155	0.596268	0.402325	0.40037	0.427717	0.401834	0.366663	0.407271	0.385366	0.372422	0.382957	0.415359	0.42395	1.29873	0.461852	0.424331	0.381439	0.465743	0.384407	0.385833	0.52808	0.454057	0.387998
	1.76295	0.39744	0.443177	0.576812	0.380963	0.385521	0.711878	0.44042	0.381457	0.423095	0.454673	0.583896	0.731442	0.394798	0.399713	0.371708	0.407827	0.375534	0.488868	0.394736	0.442914	0.394992	0.377371	0.401886	0.412405	0.447633	0.407391	0.594637	0.424787	0.384382	0.433322	0.394461	0.391688	0.418992	0.374007	0.368755	0.392356	0.416125	0.443972	1.15529	0.450171	0.445224	0.380955	0.523295	0.391265	0.384274	0.591311	0.451344	0.384256
	1.79625	0.403225	0.458284	0.602868	0.386036	0.39043	0.656365	0.432874	0.387283	0.410677	0.409931	0.569256	0.995202	0.406228	0.394822	0.369036	0.393435	0.41104	0.456026	0.401404	0.446327	0.414203	0.3971	0.391488	0.400723	0.437432	0.37594	0.546194	0.413226	0.392416	0.412998	0.403606	0.372467	0.419178	0.391545	0.382432	0.393993	0.429307	0.438837	1.09027	0.428778	0.446393	0.376165	0.742579	0.382062	0.38922	0.586325	0.47239	0.380634
	1.82962	0.42269	0.448678	0.627517	0.391098	0.402311	0.624225	0.431117	0.391067	0.468829	0.449047	0.617595	0.838281	0.399921	0.398602	0.383015	0.433293	0.405407	0.440996	0.412125	0.4401	0.38564	0.373874	0.400842	0.405755	0.438785	0.404681	0.527713	0.423025	0.410682	0.416741	0.399846	0.381437	0.412164	0.393135	0.394339	0.413505	0.419657	0.432791	0.954439	0.450396	0.436266	0.375491	0.902098	0.399662	0.390687	0.701598	0.488573	0.401606
	1.86297	0.390624	0.475204	0.678791	0.403381	0.39028	0.574708	0.431675	0.392351	0.426244	0.42885	0.570295	0.718727	0.390071	0.414614	0.381451	0.451698	0.396207	0.421318	0.428989	0.445614	0.391426	0.38192	0.392379	0.406965	0.449185	0.394933	0.524802	0.435192	0.406984	0.423752	0.390642	0.380127	0.420131	0.38808	0.38693	0.420982	0.400732	0.440539	0.960934	0.430583	0.477354	0.438589	0.825875	0.398853	0.389405	0.989094	0.46086	0.385591
	1.89627	0.375411	0.463769	0.839989	0.376915	0.399469	0.586799	0.444047	0.386081	0.402448	0.439031	0.553292	0.642165	0.397627	0.399989	0.381127	0.554948	0.391943	0.442914	0.409082	0.432993	0.394117	0.385013	0.414873	0.400564	0.443911	0.414984	0.520349	0.431341	0.42509	0.446418	0.389586	0.386979	0.410471	0.3926	0.380739	0.39683	0.403451	0.450992	1.1478	0.482906	0.480173	0.395334	0.738738	0.401919	0.41735	0.956183	0.447335	0.391488
	1.92962	0.388167	0.46178	0.969018	0.399979	0.398946	0.516997	0.429678	0.402287	0.408346	0.435168	0.590011	0.618943	0.411051	0.402485	0.374301	0.572729	0.397754	0.448174	0.395539	0.445662	0.414163	0.383482	0.406225	0.405964	0.448217	0.401282	0.511347	0.427777	0.405336	0.438094	0.399354	0.375375	0.422575	0.391495	0.391678	0.391732	0.404551	0.448323	1.01507	0.557668	0.484782	0.397633	0.728049	0.396657	0.409127	0.874938	0.439867	0.384625
	1.96295	0.400884	0.468718	0.887509	0.377323	0.382965	0.457538	0.418744	0.369671	0.427459	0.440226	0.818122	0.564685	0.394382	0.400507	0.377825	0.965444	0.393245	0.414488	0.409987	0.428225	0.396606	0.391873	0.384941	0.418885	0.431938	0.379313	0.456148	0.415022	0.396824	0.425133	0.397077	0.35045	0.41271	0.380237	0.388115	0.386751	0.399135	0.421359	0.930065	1.07728	0.496156	0.378843	0.719186	0.377748	0.395015	0.755137	0.43283	0.386398
	1.99628	0.377999	0.455275	0.780264	0.378312	0.391716	0.543363	0.414863	0.367138	0.386228	0.512122	0.892612	0.512322	0.377796	0.395733	0.371512	0.849492	0.340249	0.397253	0.37857	0.427521	0.379296	0.366109	0.379313	0.391208	0.418898	0.419472	0.456471	0.414201	0.400425	0.417131	0.379162	0.35654	0.399418	0.379121	0.398634	0.372305	0.385333	0.448352	0.894525	1.12933	0.533923	0.350244	0.711334	0.387023	0.388062	0.676403	0.445136	0.392831
	2.02962	0.369659	0.425182	0.797398	0.388594	0.401109	0.557893	0.418558	0.372003	0.410449	0.708581	0.850779	0.574492	0.391895	0.404638	0.378253	0.836276	0.396237	0.425516	0.373818	0.422289	0.38011	0.378728	0.383836	0.386617	0.432684	0.389168	0.466069	0.424612	0.436702	0.435923	0.395772	0.350996	0.392125	0.388882	0.385515	0.388767	0.407758	0.441304	1.12582	1.32919	0.543723	0.376026	0.840717	0.382346	0.428484	0.686283	0.430709	0.395923
	2.06293	0.413474	0.468914	0.843488	0.41197	0.416712	0.64766	0.44379	0.397791	0.413988	1.11889	0.991193	0.661602	0.421108	0.432705	0.406975	0.934373	0.415123	0.468571	0.422105	0.449756	0.400798	0.392962	0.407419	0.4164	0.464248	0.362821	0.473364	0.452303	0.445737	0.492024	0.402996	0.404407	0.447412	0.38975	0.385922	0.420696	0.429415	0.498541	1.27031	1.3908	0.541848	0.396754	0.986125	0.410285	0.432735	0.762008	0.443059	0.417779
	2.0963	0.408882	0.497489	0.923061	0.42501	0.443901	0.80919	0.483644	0.415976	0.445908	1.15915	1.0234	0.669204	0.418859	0.445637	0.414993	1.01582	0.411825	0.475724	0.433801	0.473455	0.444941	0.40953	0.429674	0.426961	0.47585	0.422112	0.509277	0.45823	0.492917	0.507651	0.42941	0.42376	0.460772	0.428735	0.413913	0.423965	0.459142	0.488374	1.40303	1.46148	0.578024	0.388657	1.17144	0.422935	0.458861	0.752061	0.466633	0.451396
	2.12962	0.439795	0.52695	0.986535	0.459326	0.510863	0.818987	0.541661	0.441373	0.476022	1.08738	1.0381	0.665919	0.431894	0.450733	0.428509	1.0722	0.453758	0.569788	0.449447	0.495722	0.437221	0.431075	0.447371	0.451304	0.479021	0.449485	0.504009	0.477298	0.533775	0.603173	0.468759	0.42971	0.498007	0.471628	0.447916	0.406748	0.476515	0.529669	1.24771	1.55515	0.606898	0.424871	1.23697	0.453775	0.512812	0.764785	0.500049	0.457777
	2.16297	0.440076	0.539469	0.975301	0.463887	0.582136	0.85069	1.27663	0.431142	0.458632	1.12856	1.03074	0.663668	0.442116	0.469263	0.448065	1.05304	0.452095	0.59458	0.446775	0.490453	0.433542	0.436044	0.467267	0.447762	0.504003	0.44205	0.516244	0.472282	0.612784	0.646188	0.481549	0.441542	0.525979	0.48023	0.448956	0.455653	0.511969	0.55033	1.24906	1.49921	0.631629	0.43323	1.33202	0.462201	0.535218	0.728631	0.48944	0.482686
	2.1963	0.478031	0.572563	1.01923	0.476434	0.727972	0.986511	1.55265	0.445201	0.515247	1.18055	1.06583	0.7662	0.505069	0.473106	0.471307	1.10385	0.47629	0.583827	0.456159	0.548644	0.468492	0.442807	0.466699	0.453222	0.543909	0.475447	0.523925	0.513204	0.667356	0.78776	0.504771	0.473962	0.555943	0.493375	0.467385	0.448448	0.636196	0.581025	1.41619	1.61142	0.668321	0.483813	1.32457	0.472733	0.619484	0.77783	0.510477	0.480126
	2.2296	0.485975	0.581799	0.996121	0.504277	0.72804	0.897783	1.53709	0.461174	0.5248	1.23775	1.0381	0.788408	0.508694	0.49761	0.507575	1.10118	0.498629	0.637409	0.483395	0.63874	0.478292	0.455348	0.472249	0.483147	0.583281	0.475475	0.575712	0.53808	0.689881	0.854636	0.509828	0.484411	0.576708	0.515251	0.46369	0.446032	1.00483	0.634106	1.39346	1.65468	0.679076	0.474923	1.33632	0.515121	0.605913	0.799162	0.559876	0.499653
	2.26295	0.498478	0.63941	0.936797	0.509787	0.779504	1.01476	1.65199	0.475215	0.533954	1.25138	1.0781	0.790142	0.512637	0.508782	0.550897	1.08827	0.49201	0.656867	0.503117	0.916599	0.487301	0.502279	0.501609	0.488425	0.592793	0.465017	0.578954	0.570927	0.774379	0.860683	0.558128	0.490578	0.603311	0.545058	0.493383	0.509668	1.08749	0.634439	1.38387	1.74034	0.767589	0.485164	1.35945	0.515132	0.648048	0.830392	0.566408	0.560995
	2.29628	0.520822	0.606353	0.974572	0.524806	0.804754	0.958419	1.65983	0.470286	0.598815	1.22465	1.03847	0.878653	0.526167	0.53335	0.703588	1.15303	0.520535	0.705765	0.518628	1.01668	0.502608	0.516717	0.517432	0.534038	0.617342	0.504517	0.640029	0.612238	0.80826	0.995863	0.577857	0.528122	0.630857	0.582437	0.525334	0.485629	1.11257	0.771293	1.41416	1.79122	0.914661	0.526595	1.33484	0.549526	0.693808	0.919794	0.584738	0.548932
	2.32962	0.541046	0.659058	1.04445	0.542447	0.830753	1.07419	1.61326	0.511873	0.560879	1.25355	1.08132	0.972885	0.557533	0.543722	0.824153	1.14929	0.528605	0.680082	0.542519	1.05319	0.508676	0.491132	0.509104	0.538953	0.628043	0.509181	0.662424	0.660679	0.833307	0.990381	0.591386	0.54723	0.645573	0.667506	0.52562	0.524512	1.1375	0.814182	1.46211	1.66746	1.01491	0.528367	1.38208	0.581073	0.728789	0.959888	0.642411	0.587077
	2.36298	0.510396	0.665508	1.02965	0.567462	0.889232	1.02137	1.64282	0.515334	0.589285	1.29781	1.06061	0.979741	0.583203	0.53993	0.969264	1.12053	0.506201	0.752567	0.546214	1.04538	0.524437	0.516561	0.529658	0.544993	0.646178	0.526937	0.726957	0.691016	0.815228	1.0539	0.63012	0.559145	0.686488	0.72999	0.550982	0.515197	1.14081	0.863368	1.352	1.70464	1.07105	0.561733	1.3726	0.594804	0.761593	0.921175	0.661685	0.601498
	2.3963	0.554835	0.691967	0.947829	0.590183	0.912193	1.0262	1.64992	0.544927	0.606386	1.25458	1.07406	1.00536	0.582137	0.585815	0.987786	1.10804	0.532266	0.823377	0.543255	1.02827	0.552524	0.532202	0.561366	0.558221	0.678714	0.525743	0.732479	0.718931	0.882155	1.03646	0.63736	0.577694	0.684207	0.831316	0.550432	0.513153	1.16363	0.889648	1.40819	1.81066	1.05618	0.573265	1.40833	0.593322	0.707355	0.907003	0.762844	0.587114
	2.42962	0.558749	0.663516	0.963912	0.594084	0.96558	1.04377	1.66283	0.54441	0.684384	1.2914	1.07406	0.997591	0.594242	0.599247	1.06109	1.04757	0.564667	0.89435	0.571608	1.03199	0.517801	0.515723	0.559732	0.576335	0.693525	0.530284	0.774332	0.764165	0.87082	1.06301	0.650597	0.599067	0.704794	0.858635	0.561317	0.554466	1.11264	0.924149	1.35113	1.72439	1.0855	0.549727	1.37824	0.632498	0.784195	0.883842	0.760576	0.611917
	2.46297	0.55189	0.741074	0.91637	0.593493	0.984099	1.07261	1.65823	0.550001	0.667145	1.29493	1.0711	0.974504	0.621086	0.622384	1.06183	1.14746	0.570931	1.00765	0.57901	1.00938	0.558673	0.54598	0.600986	0.584357	0.73269	0.543027	0.760864	0.78385	0.900417	1.03659	0.673525	0.611347	0.704729	0.882139	0.575926	0.570531	1.1238	0.967403	1.36161	1.84237	1.12586	0.567978	1.38707	0.691811	0.778311	0.899346	0.813167	0.617094
	2.49632	0.563765	0.709643	0.938698	0.608296	1.00566	1.08083	1.59605	0.570918	0.66942	1.3032	1.06497	1.00233	0.639929	0.620939	1.06894	1.05784	0.593077	0.942707	0.573939	1.0419	0.581655	0.572873	0.617098	0.605133	0.700303	0.580338	0.815758	0.799106	0.921918	1.03417	0.680379	0.616958	0.704987	0.875091	0.545459	0.568866	1.1506	0.992697	1.31205	1.81921	1.14661	0.616129	1.39472	0.815105	0.810218	0.916979	0.854033	0.627298
	2.52963	0.573674	0.747533	0.94323	0.675372	1.01907	1.12697	1.64841	0.578453	0.730412	1.32504	1.07409	1.01198	0.658968	0.667621	1.07083	1.14693	0.615828	1.03757	0.593782	1.06624	0.61446	0.569435	0.700096	0.632724	0.754793	0.579883	0.803447	0.791306	0.915174	1.07446	0.724338	0.633142	0.735165	0.905028	0.591591	0.596243	1.19714	1.00042	1.28917	1.76159	1.16482	0.629392	1.37866	0.87638	0.818889	0.937667	0.874705	0.646003
	2.56295	0.59865	0.752424	0.894967	0.664067	1.04104	1.10317	1.56252	0.552344	0.735745	1.31754	1.08908	1.05966	0.66144	0.647002	1.07818	1.1047	0.639994	1.08384	0.619546	1.02799	0.625888	0.583455	0.69601	0.64724	0.746145	0.584057	0.853929	0.798572	0.903954	1.06833	0.742799	0.667669	0.741507	0.87542	0.60179	0.594503	1.14606	1.0383	1.27747	1.70629	1.15689	0.618225	1.38658	0.939527	0.833725	0.898749	0.931508	0.644909
	2.59628	0.603424	0.834655	0.933201	0.702397	1.00701	1.11534	1.63969	0.596841	0.757884	1.30566	1.08153	1.01509	0.689253	0.655199	1.06855	1.0339	0.667465	1.07376	0.630201	1.04807	0.663401	0.594359	0.692128	0.622854	0.805039	0.596981	0.880999	0.831872	0.918992	1.07584	0.740463	0.683277	0.754573	0.891351	0.59996	0.608741	1.16249	1.022	1.19891	1.68239	1.20983	0.636114	1.38862	0.894204	0.864937	0.947392	0.925461	0.666742
	2.62962	0.600019	0.853444	1.00205	0.704311	1.04795	1.11485	1.62632	0.611726	0.74568	1.34423	1.05332	0.982541	0.691713	0.654109	1.07118	1.00641	0.633319	1.08125	0.666635	1.00067	0.701932	0.596684	0.775373	0.671318	0.746439	0.600295	0.980621	0.840748	0.928705	1.12817	0.714134	0.660448	0.736553	0.943796	0.628546	0.639852	1.16928	1.02531	1.21978	1.88928	1.20802	0.637907	1.35511	0.899045	0.823212	0.933603	0.913201	0.709597
	2.66295	0.633619	0.83857	1.06149	0.729337	1.06084	1.22712	1.57288	0.620574	0.72085	1.43706	1.03016	1.03685	0.73398	0.698259	1.05629	1.03203	0.661936	1.12797	0.666678	0.997341	0.713585	0.603971	0.787148	0.685498	0.797828	0.586047	0.938409	0.852847	0.94666	1.08698	0.759594	0.698541	0.778052	0.912751	0.619476	0.63283	1.14913	1.02716	1.27072	1.72299	1.19723	0.67877	1.34562	0.889741	0.868031	0.937045	0.982947	0.689784
	2.6963	0.60479	0.873095	1.07413	0.734338	1.07005	1.23599	1.52258	0.609238	0.735703	1.31835	1.00043	1.05978	0.753474	0.676126	1.12928	1.02052	0.66849	1.14821	0.660745	1.04155	0.745723	0.646496	0.862837	0.685661	0.785754	0.625459	0.953006	0.846852	0.98861	1.10255	0.786927	0.69933	0.814147	0.969546	0.642341	0.668541	1.18555	1.04793	1.22571	1.76262	1.1715	0.696165	1.34415	0.931238	0.892945	0.939794	0.965664	0.69267
	2.72962	0.652021	0.889342	1.03763	0.761	0.982429	1.28615	1.55702	0.630054	0.731201	1.32635	1.01025	1.0443	0.767553	0.694939	1.09338	0.949839	0.660489	1.14411	0.676317	1.0071	0.750431	0.606299	0.831092	0.68878	0.755908	0.615422	0.926511	0.863467	0.94416	1.10085	0.783154	0.725489	0.823989	0.909801	0.640834	0.637739	1.17027	0.99751	1.21072	1.81729	1.17581	0.702319	1.35473	0.90125	0.867386	0.899509	0.986537	0.734351
	2.76293	0.669451	0.933033	1.05713	0.768377	1.0321	1.30038	1.53665	0.649897	0.740378	1.33367	1.00668	1.04966	0.803987	0.737688	1.10867	0.973066	0.707831	1.20828	0.679486	1.01101	0.74826	0.656018	0.832563	0.710423	0.812811	0.624013	0.943086	0.86364	0.984463	1.11641	0.782581	0.717281	0.821077	0.968271	0.664737	0.686473	1.14097	1.09486	1.14126	1.65901	1.1446	0.709597	1.3745	0.921181	0.930846	0.914906	0.985138	0.715922
	2.79628	0.699958	0.916935	1.00868	0.735483	1.03358	1.23815	1.52981	0.654352	0.773988	1.30265	1.03849	1.06611	0.792136	0.718941	1.11387	0.890917	0.709743	1.19836	0.689356	1.01962	0.75061	0.628592	0.808608	0.697351	0.794436	0.613194	0.920495	0.860681	0.974195	1.13524	0.792124	0.733362	0.824626	0.945317	0.678319	0.653289	1.14811	1.03266	1.06783	1.78097	1.10639	0.730723	1.3363	0.928181	0.897357	0.896771	0.917345	0.711001
	2.82962	0.701483	0.893298	1.08312	0.796892	1.0617	1.29764	1.46155	0.66728	0.738144	1.35908	1.10036	1.04376	0.809251	0.740742	1.10786	0.932824	0.700105	1.21308	0.703892	0.993447	0.769665	0.661305	0.813277	0.757076	0.873842	0.635687	0.944458	0.883212	0.969411	1.09756	0.829497	0.743175	0.832275	0.945946	0.708143	0.691954	1.08752	1.03457	1.10053	1.60873	1.15467	0.692363	1.32029	0.927252	0.897211	0.917469	0.943643	0.714018
	2.86297	0.701636	0.935373	0.997583	0.794108	1.03201	1.18796	1.42183	0.641172	0.790682	1.3427	0.997439	1.06525	0.781582	0.766057	1.10185	0.867483	0.747898	1.20192	0.675685	0.964764	0.825075	0.674744	0.852402	0.780138	0.873739	0.660951	0.903925	0.908861	0.962429	1.09206	0.826086	0.766666	0.838077	0.919468	0.696585	0.692188	1.10784	1.04733	1.02348	1.64219	1.13319	0.710272	1.29129	0.953622	0.89609	0.898442	0.96512	0.721069
	2.8963	0.721159	0.918436	0.987905	0.765114	0.992461	1.14434	1.44057	0.634888	0.779026	1.28814	1.00109	1.02657	0.793045	0.742763	1.07894	0.938965	0.735707	1.17944	0.687135	0.924482	0.773091	0.703879	0.807505	0.783026	0.838128	0.655745	0.89304	0.896125	0.957718	1.10939	0.827106	0.750557	0.855704	0.876274	0.691449	0.681248	1.08653	1.03447	0.96718	1.54172	1.08028	0.718886	1.27351	0.908965	0.910901	0.848699	0.958003	0.746536
	2.9296	0.766721	0.93076	0.997113	0.776249	1.02708	1.22752	1.42544	0.687164	0.816385	1.25797	1.00347	0.985161	0.823333	0.779687	1.07117	0.918288	0.771078	1.19464	0.792855	0.96984	0.773647	0.796886	0.810967	0.767297	0.865158	0.717556	0.869164	0.916873	0.939182	1.08289	0.855766	0.734005	0.856804	0.931159	0.730519	0.697571	1.09726	1.04917	1.03633	1.54856	1.09945	0.75682	1.25771	0.913517	0.912488	0.872909	0.984128	0.790601
	2.96297	0.809761	0.99352	0.947731	0.78401	1.04853	1.19628	1.39927	0.747112	0.798249	1.25801	1.06286	1.01264	0.867962	0.782725	1.06231	0.938712	0.804132	1.18924	0.757704	0.961903	0.803731	0.847649	0.839919	0.797052	0.833833	0.668465	0.842641	0.909126	0.950212	1.08714	0.843344	0.756574	0.852438	0.964207	0.702526	0.711084	1.07594	1.03582	0.981853	1.52803	1.12615	0.774419	1.23532	0.950488	0.983933	0.905328	0.9828	0.785638
	2.9963	0.842558	0.982995	0.972506	0.823544	1.0563	1.17197	1.35492	0.70037	0.77835	1.38867	1.05149	1.03597	0.872934	0.795122	1.0656	0.899035	0.821381	1.26765	0.716033	0.94797	0.792367	0.944226	0.807293	0.825054	0.889715	0.691308	0.840049	0.885139	1.00737	1.08597	0.845266	0.770099	0.90085	0.910424	0.743823	0.719017	1.0805	1.10857	1.00595	1.50761	1.10307	0.816659	1.24203	0.954208	0.913022	0.905317	1.01589	0.797257
	3.02963	0.832875	1.00982	0.960711	0.79979	1.05826	1.19649	1.32423	0.778686	0.791788	1.26507	1.06339	1.00508	0.854475	0.797986	1.08141	0.884526	0.831179	1.21013	0.720181	0.974441	0.825299	1.01421	0.845784	0.818751	0.878406	0.672421	0.835765	0.898725	1.00167	1.09066	0.850411	0.758078	0.908654	0.855302	0.751736	0.734618	1.03809	1.14626	0.993838	1.45957	1.07738	0.755299	1.18058	0.947082	0.975576	0.88926	0.966138	0.814965
	3.06295	0.821709	1.0676	0.92288	0.784668	1.06112	1.18745	1.27794	0.76416	0.777516	1.21895	1.06992	1.00536	0.844991	0.796605	1.04501	0.885723	0.786553	1.16942	0.739553	0.984297	0.793057	1.01826	0.846171	0.828698	0.880605	0.660635	0.85594	0.831696	0.993284	1.06842	0.844174	0.769525	0.900119	0.897054	0.722917	0.738713	1.06206	1.22885	0.977698	1.44913	1.09093	0.79466	1.24438	0.933892	0.986081	0.891103	0.97998	0.792099
	3.09628	0.878933	1.13481	0.947582	0.822301	1.10867	1.20476	1.2863	0.770949	0.791811	1.29971	1.07725	1.02254	0.88065	0.823391	1.08161	0.880448	0.834742	1.22645	0.759268	0.993774	0.818976	1.04643	0.890965	0.860527	0.877796	0.706309	0.84252	0.873923	1.03902	1.13196	0.885713	0.772697	0.912724	0.90062	0.779233	0.732986	1.05065	1.29811	0.952775	1.48822	1.09354	0.820662	1.252	0.938633	0.971249	0.898054	0.936558	0.802255
	3.12962	0.866114	1.21256	0.899064	0.84713	1.0111	1.22603	1.24562	0.81433	0.82281	1.28297	1.07444	1.01045	0.924033	0.816665	1.10489	0.981559	0.877728	1.29269	0.729057	0.968811	0.776124	1.06304	0.889222	0.880406	0.915261	0.746181	0.825377	0.837392	0.991866	1.12992	0.873481	0.759197	0.933535	0.895315	0.784131	0.717376	1.07184	1.2902	0.941996	1.44455	1.07042	0.829152	1.20173	0.982341	0.991251	0.846129	0.993441	0.829531
	3.16298	0.92081	1.25824	0.87934	0.845991	1.07509	1.16506	1.27366	0.755038	0.817967	1.30224	1.06618	1.02573	0.879934	0.839826	1.09416	0.90422	0.829358	1.339	0.741664	0.949942	0.814076	1.05965	0.9043	0.892056	0.927725	0.716571	0.796369	0.841954	0.982869	1.08704	0.874003	0.776175	0.904445	0.900329	0.765879	0.741048	1.0289	1.28199	0.982312	1.42928	1.08959	0.786713	1.15306	0.918587	0.957257	0.865691	0.944661	0.812027
	3.19625	0.9139	1.33193	0.900317	0.865942	1.01539	1.10257	1.20363	0.788431	0.819498	1.28052	1.10221	1.02443	0.960116	0.842627	1.08305	0.910601	0.841188	1.29428	0.799461	0.950136	0.809023	1.04944	0.963262	0.922607	0.886412	0.724976	0.80589	0.844129	1.02727	1.09503	0.863303	0.803611	0.940288	0.909222	0.738463	0.72695	1.07636	1.21142	0.970571	1.40049	1.03803	0.839925	1.215	0.943628	0.995519	0.856036	0.96799	0.795424
	3.22965	0.999537	1.44962	0.897189	0.883278	1.15684	1.16855	1.30516	0.843046	0.851784	1.45376	1.16046	1.01252	0.946778	0.868921	1.11548	0.961476	0.853446	1.35894	0.824595	1.03209	0.836444	1.06509	0.916417	0.920888	0.952397	0.738385	0.859691	0.837468	1.08943	1.14529	0.918269	0.834671	0.973554	0.937123	0.808276	0.804197	1.05556	1.33433	1.01689	1.49799	1.10946	0.831229	1.26232	0.941436	1.04259	0.81908	0.990695	0.841089
	3.26293	1.02051	1.4873	0.858529	0.882729	1.12672	1.25504	1.28491	0.836374	0.931205	1.48242	1.13214	1.01714	0.960719	0.86372	1.13196	0.93944	0.83544	1.38408	0.815459	0.928613	0.832995	1.05258	0.963108	0.924688	0.942568	0.764937	0.821578	0.818161	1.08224	1.17616	0.956571	0.829062	0.967945	0.921793	0.803208	0.79733	1.11718	1.30467	0.972258	1.43625	1.11789	0.859353	1.19561	0.99176	1.01503	0.86813	1.01211	0.882059
	3.29627	1.07411	1.31603	0.867936	0.895576	1.11776	1.16247	1.23784	0.855764	0.815484	1.39928	1.10542	1.04283	0.939534	0.849388	1.09253	0.895115	0.905404	1.33091	0.802272	0.936214	0.861329	1.03462	0.925758	0.905294	0.988926	0.746357	0.796416	0.802146	1.11025	1.13275	0.949701	0.839443	0.989977	0.943159	0.845101	0.761625	1.07354	1.26845	0.913324	1.41103	1.03414	0.823112	1.17249	0.935035	1.04449	0.875291	0.920849	0.872215
	3.32965	1.04677	1.44643	0.920636	0.895369	1.1869	1.22872	1.15997	0.835966	0.894823	1.45439	1.19151	1.04889	1.00034	0.8586	1.1126	0.901946	0.882561	1.32574	0.793415	0.935969	0.885124	1.04561	0.932992	0.95338	0.964297	0.774394	0.83742	0.780897	1.06742	1.18227	0.955952	0.822097	0.992547	0.939867	0.84693	0.784307	1.08362	1.30177	0.947126	1.36189	1.12426	0.865643	1.18693	0.91336	1.09177	0.86728	1.02114	0.946772
	3.36293	1.22975	1.62992	1.02425	0.957577	1.16594	1.25225	1.21941	0.850086	0.931388	1.63072	1.21204	1.03048	1.05193	0.904005	1.16648	0.858404	0.879793	1.41294	0.863081	0.986074	0.888675	1.10893	0.981229	1.01191	1.03997	0.802726	0.859475	0.775107	1.15287	1.26329	0.9615	0.872028	1.0545	0.978294	0.832382	0.783798	1.05796	1.43725	0.945973	1.47891	1.1006	0.883069	1.26785	0.923697	1.13915	0.852571	1.01588	0.97231
	3.39628	1.1538	1.43019	0.918757	0.861512	1.1594	1.13752	1.12248	0.845382	0.856575	1.47756	1.10762	0.992776	0.968907	0.85239	1.1015	0.869962	0.865268	1.46387	0.852467	0.95097	0.828028	0.940459	0.92495	0.899432	1.01811	0.825498	0.802393	0.787059	1.0714	1.19101	0.966208	0.852277	1.00018	0.914861	0.820806	0.734027	1.03692	1.30805	0.791258	1.27333	1.09594	0.84942	1.18132	0.944613	1.02305	0.856628	0.948888	0.899456
	3.4296	1.31278	1.40931	1.04988	0.943698	1.09005	0.97569	1.12154	0.829345	0.908124	1.44534	1.10677	1.04532	1.04948	0.916091	1.08009	0.881762	0.829056	1.37916	0.815981	0.904766	0.841358	0.974165	0.936201	0.981967	1.01402	0.797279	0.805305	0.746928	1.08946	1.17983	0.9592	0.812648	1.01466	0.918917	0.812452	0.769627	1.03617	1.31344	0.890319	1.28556	1.07143	0.892205	1.16694	0.906754	1.10158	0.843714	0.948435	0.933951
	3.46295	1.63234	1.68219	1.08918	1.00026	1.27272	1.12132	1.19393	0.902163	0.956339	1.94175	1.22343	1.10139	1.09122	1.00028	1.2006	0.897948	0.911638	1.60383	0.946172	1.00804	0.899686	1.02715	1.01545	1.09503	1.06349	0.819735	0.843296	0.785883	1.19869	1.34391	1.09692	0.924936	1.08641	1.01568	0.910741	0.868815	1.046	1.55411	0.8951	1.28472	1.22521	0.900952	1.29683	0.988	1.22337	0.922161	1.10201	0.993555
	3.4963	1.77823	1.73052	1.09794	1.07022	1.18666	1.16748	1.20021	1.00012	1.02362	1.88962	1.21625	1.18743	1.11385	1.02832	1.22804	0.949367	0.949065	1.65127	0.898544	0.994016	0.888998	1.12071	0.994058	1.07918	1.13366	0.911755	0.859398	0.788386	1.22175	1.37679	1.06095	0.921829	1.11918	0.99134	0.88202	0.874557	1.13671	1.48656	0.916165	1.32112	1.22389	0.944123	1.29681	1.00727	1.21771	0.916454	1.07422	1.03884
	3.52962	1.71865	1.37286	1.12102	1.04256	1.25435	1.13059	1.11653	0.891566	0.956622	1.5091	1.11912	1.09891	1.11783	0.992193	1.15792	0.869039	0.876656	1.48578	0.920424	0.942717	0.894362	1.02402	0.977694	1.01388	1.09655	0.857756	0.802871	0.738588	1.12013	1.25724	1.04072	0.907762	1.09973	0.940755	0.881327	0.824702	1.06501	1.47313	0.841353	1.26224	1.12602	0.927545	1.21689	0.993916	1.10233	0.880323	1.03543	1.03999
	3.56297	1.64123	1.46392	1.07889	1.01203	1.20448	1.00366	1.08355	0.909438	0.956055	1.63597	1.18522	1.09224	1.04618	0.952926	1.15495	0.874266	0.888127	1.42815	0.92509	0.945324	0.852239	1.03501	0.934096	0.951329	1.04734	0.861282	0.819738	0.70882	1.09091	1.2688	0.979186	0.821607	1.06439	0.930252	0.863557	0.832526	1.00427	1.28486	0.770355	1.15849	1.02277	0.848457	1.17576	0.926962	1.11355	0.799465	0.974298	0.957569
	3.5963	1.78009	1.3746	1.03293	0.999965	1.09624	0.980225	1.04689	0.895525	0.907964	1.53581	1.09994	1.04444	1.06393	1.01076	1.11118	0.827164	0.906384	1.44779	0.916157	0.907499	0.954323	0.981112	0.904488	0.977545	1.01273	0.844823	0.774633	0.692398	1.07237	1.22279	0.997058	0.874368	1.09515	0.950452	0.868002	0.806432	1.01697	1.35201	0.767761	1.1027	1.08916	0.897574	1.1413	0.918601	1.0795	0.845962	0.97864	1.00337
	3.62965	1.49121	1.21665	0.910406	0.920377	1.00987	0.845063	0.978688	0.821882	0.791692	1.30631	1.00969	0.975454	1.02279	0.923874	1.01948	0.790324	0.90352	1.27327	0.842151	0.871731	0.810218	0.910803	0.893343	0.911755	0.976604	0.833019	0.770973	0.661209	1.05355	1.06403	0.902048	0.803388	0.995485	0.863379	0.806178	0.775769	0.937658	1.20373	0.729301	1.01418	0.950775	0.831494	1.04935	0.873755	0.986192	0.807962	0.886194	0.858574
	3.66293	1.35097	1.19751	0.95494	0.913013	0.962356	0.907643	0.973862	0.832781	0.811983	1.2615	0.990514	0.914358	1.02857	0.964963	1.0188	0.776143	0.882014	1.34041	0.822082	0.853657	0.852366	0.874808	0.817992	0.921753	1.03207	0.792688	0.737215	0.657076	0.993587	1.07581	0.921804	0.828089	0.991286	0.802171	0.829932	0.770772	0.949717	1.18354	0.725622	0.998632	0.992928	0.889017	1.01148	0.870379	1.01252	0.80091	0.897948	0.87035
	3.6963	1.43563	1.1942	1.0226	0.911749	0.981075	0.863102	0.953794	0.856159	0.899095	1.21291	0.976417	0.974622	1.03881	0.967012	0.996121	0.776024	0.884215	1.35914	0.8155	0.885876	0.830112	0.915286	0.890204	0.942496	0.980445	0.801119	0.755023	0.654526	1.02519	1.0573	0.904757	0.783187	1.0438	0.883404	0.811131	0.789645	0.949526	1.19156	0.7066	0.915535	0.958777	0.893313	1.02774	0.855553	1.0224	0.785708	0.903505	0.894053
	3.72963	1.4009	1.13506	1.15348	0.922921	0.949981	0.843661	0.978396	0.856941	0.833666	1.26377	0.977713	0.925164	1.03489	0.918401	1.03173	0.796409	0.877326	1.33983	0.831466	0.876775	0.875795	0.914013	0.882814	0.916586	1.03374	0.810003	0.779579	0.640036	0.978032	1.0786	0.937891	0.794362	1.0129	0.850616	0.833617	0.760949	0.938122	1.16092	0.66941	0.940376	0.954952	0.853937	1.01001	0.872663	1.06619	0.800758	0.914606	0.865235
	3.76297	1.42326	1.1508	1.38903	0.947225	0.953481	0.864864	1.07718	0.852864	0.844086	1.26724	0.962424	0.886708	0.995817	0.965097	0.994992	0.788391	0.929449	1.34032	0.832205	0.820821	0.808404	0.910985	0.858325	0.942887	0.966312	0.825655	0.737105	0.64509	0.978434	1.06788	0.883219	0.822371	1.03982	0.844829	0.809613	0.777248	0.958851	1.12164	0.656658	0.955397	0.963002	0.832212	0.982147	0.82913	1.03073	0.726367	0.890112	0.902758
	3.7963	1.49029	1.13785	1.36109	0.935332	1.00952	0.843913	1.08905	0.856597	0.788013	1.30945	0.945086	0.917399	1.04285	0.953171	1.0215	0.777744	0.896958	1.32782	0.802337	0.877544	0.852592	0.907084	0.865006	0.932732	1.08402	0.761569	0.766136	0.630148	1.0066	1.11983	0.902324	0.823615	1.06333	0.835827	0.800987	0.864835	0.949693	1.18943	0.643737	0.939942	0.932486	0.897486	0.984157	0.90182	1.07685	0.712053	0.858855	0.902462
	3.82962	1.51162	1.12064	1.30642	0.977109	0.950394	0.760906	1.06468	0.863444	0.880757	1.28249	0.989268	0.88204	1.06858	0.926891	0.988938	0.854468	0.943594	1.33695	0.855542	0.772414	0.833812	0.891902	0.844296	0.900808	1.08098	0.783861	0.725294	0.624669	1.00869	1.09415	0.898905	0.840259	1.12234	0.861162	0.802064	0.862409	0.929301	1.15536	0.654177	0.931958	0.904989	0.887427	0.970371	0.888608	1.04315	0.740783	0.909015	0.896049
	3.86292	1.43271	1.15229	1.27436	0.940711	1.00509	0.823643	1.09388	0.851158	0.817954	1.28164	0.992683	0.884807	1.05965	0.947434	1.02354	0.874644	0.875438	1.35931	0.868633	0.82407	0.821222	0.828014	0.848355	0.921853	1.04225	0.817186	0.750667	0.634256	1.00592	1.08353	0.936053	0.855764	1.1309	0.851378	0.847359	0.865961	0.937934	1.15346	0.61788	0.874537	0.953306	0.933353	0.979433	0.890159	1.09271	0.736951	0.902788	0.910341
	3.8963	1.34736	1.1045	1.29157	0.927773	0.997118	0.736408	1.07374	0.835676	0.838259	1.23145	0.937968	0.880437	1.02745	0.947726	0.999245	0.826701	0.922011	1.30749	0.865487	0.781745	0.825742	0.848976	0.890015	0.925691	1.00634	0.77743	0.722941	0.626288	0.973505	1.07952	0.918089	0.802487	1.08389	0.803054	0.781748	0.880655	0.890301	1.07807	0.594411	0.869771	0.913949	0.837923	0.952451	0.872163	0.99419	0.696612	0.870493	0.843667
	3.92967	1.35323	1.11222	1.23788	0.908588	0.98131	0.726064	1.0366	0.871999	0.862601	1.20799	0.950496	0.86196	1.00202	0.937342	1.00718	0.838606	0.8852	1.46003	0.851634	0.770766	0.872908	0.848051	0.854682	0.945652	1.01589	0.773879	0.738085	0.600712	0.992436	1.08292	0.901411	0.803462	1.12307	0.829121	0.850727	0.891791	0.918001	1.10358	0.596212	0.84305	0.885552	0.907662	0.942419	0.906086	1.06133	0.717811	0.866359	0.886927
	3.96293	1.38225	1.12804	1.15852	0.881834	0.995166	0.673789	1.04651	0.837783	0.835312	1.22381	0.951576	0.847735	1.07546	0.947392	0.954166	0.84989	0.880814	1.30487	0.820845	0.755908	0.839232	0.820862	0.842691	0.926465	1.04168	0.78559	0.727227	0.601841	0.99223	1.05846	0.906061	0.829538	1.08078	0.826938	0.808698	0.869384	0.901826	1.05169	0.592796	0.847003	0.893276	0.841566	0.925542	0.865812	1.0036	0.68819	0.827449	0.894475
	3.9963	1.34908	1.09936	1.12123	0.901111	0.990541	0.720987	1.01084	0.850507	0.836278	1.17542	0.912408	0.824057	1.04764	0.969116	0.952355	0.798704	0.886339	1.39079	0.872481	0.759827	0.876002	0.784272	0.822577	0.910857	1.05427	0.812172	0.717588	0.590817	0.954018	1.13575	0.89836	0.815959	1.15824	0.800239	0.855141	0.905819	0.895407	1.07967	0.581768	0.869685	0.864072	0.837588	0.917879	0.891027	1.0758	0.699313	0.83	0.875608
	4.02965	1.38565	1.00109	1.11271	0.886863	0.957252	0.69168	0.97022	0.830155	0.822158	1.1503	0.929834	0.835989	1.04394	0.939931	0.955417	0.791041	0.9097	1.35541	0.850731	0.771401	0.820068	0.813051	0.866527	0.917607	0.963868	0.7635	0.74643	0.604041	0.931492	1.05928	0.919043	0.823993	1.14205	0.780464	0.768271	0.883867	0.863653	1.07784	0.642033	0.853806	0.864868	0.835175	0.908045	0.881197	0.993106	0.687116	0.85544	0.902221
	4.06297	1.36447	1.02832	1.07155	0.885549	0.946695	0.725712	0.952928	0.834811	0.813732	1.13826	0.965391	0.858253	0.995718	0.925275	0.917647	0.78223	0.878873	1.31887	0.835966	0.743589	0.798528	0.847089	0.873704	0.88607	1.00847	0.751389	0.755534	0.593192	0.95156	1.0553	0.889566	0.843408	1.11864	0.798304	0.825968	0.881131	0.880606	1.06891	0.579583	0.827117	0.877405	0.86546	0.939247	0.878592	1.05721	0.662876	0.820341	0.861256
	4.09628	1.27871	1.0312	1.02449	0.894237	0.898362	0.70875	0.897679	0.829741	0.811452	1.12309	0.895898	0.810416	1.04913	0.926497	0.937778	0.770464	0.881274	1.29609	0.826805	0.703341	0.859646	0.822398	0.819624	0.933153	0.93829	0.734929	0.699824	0.585759	0.953727	1.07826	0.882912	0.833641	1.15211	0.788306	0.835199	0.963909	0.852067	1.08694	0.559432	0.792822	0.867533	0.836039	0.88346	0.858504	1.02102	0.655417	0.818929	0.800548
	4.12957	1.21785	1.05855	0.935184	0.859279	0.927698	0.704968	0.882698	0.851153	0.796068	1.15963	0.948779	0.835273	1.01599	0.912384	0.942542	0.733627	0.852754	1.39223	0.861854	0.691871	0.849935	0.826499	0.810653	0.873208	0.972172	0.750804	0.732931	0.565843	0.945391	1.1045	0.907535	0.823903	1.18075	0.760122	0.80801	1.04002	0.824981	1.08427	0.5598	0.812391	0.856157	0.837381	0.912101	0.837687	0.995228	0.652315	0.845442	0.84501
	4.16293	1.25325	1.02916	0.922472	0.874671	0.917709	0.677547	0.88533	0.845074	0.812748	1.12181	0.882775	0.764928	1.03685	0.901082	0.924138	0.707382	0.877355	1.38593	0.887405	0.739543	0.822752	0.796821	0.817503	0.885589	1.0036	0.744319	0.718357	0.562582	0.954825	1.06349	0.902802	0.822044	1.17688	0.751226	0.798819	1.06022	0.83952	1.02661	0.557158	0.80107	0.858017	0.858345	0.894717	0.879583	1.05286	0.643177	0.836439	0.805841
	4.1963	1.18623	0.976475	0.920044	0.886218	0.900067	0.651488	0.823476	0.798253	0.804177	1.08482	0.905216	0.806905	1.03749	0.935633	0.941444	0.693139	0.884867	1.36858	0.836943	0.712172	0.826729	0.775872	0.83675	0.847572	0.989953	0.737678	0.711317	0.53981	0.918006	1.1237	0.903144	0.873622	1.14615	0.787627	0.808095	1.08372	0.819565	1.05468	0.571602	0.801256	0.819744	0.858446	0.875828	0.842556	0.99862	0.599461	0.831178	0.848899
	4.2296	1.17912	1.01919	0.887239	0.880488	0.945733	0.670416	0.839906	0.786139	0.791862	1.01939	0.871332	0.771921	1.00356	0.879057	0.911341	0.669364	0.862057	1.31942	0.874011	0.706403	0.812182	0.802812	0.806611	0.876303	0.974299	0.739651	0.68553	0.56047	0.926308	1.08173	0.882515	0.851731	1.17247	0.763213	0.766567	1.07682	0.805525	1.02551	0.547651	0.829455	0.825306	0.866725	0.866586	0.82173	1.01735	0.609429	0.807401	0.864937
	4.26292	1.26255	1.02753	0.874226	0.812133	0.920406	0.674761	0.873147	0.827501	0.764127	1.07569	0.894418	0.774942	1.03026	0.896086	0.885376	0.662243	0.87873	1.31325	0.843728	0.706221	0.807771	0.763498	0.786581	0.896959	1.03512	0.745214	0.677858	0.543265	0.905288	1.05227	0.874805	0.813887	1.19541	0.743557	0.795437	1.09884	0.77601	1.04498	0.539346	0.860342	0.818676	0.855247	0.864011	0.838162	1.0441	0.598988	0.798358	0.832037
	4.29628	1.25516	1.0208	0.860292	0.874428	0.897204	0.650083	0.830147	0.807243	0.849656	1.06839	0.870791	0.779303	1.05895	0.915778	0.914582	0.652979	0.877034	1.35357	0.92116	0.69937	0.830379	0.847327	0.817145	0.857733	1.02832	0.732467	0.701377	0.561659	0.946237	1.12833	0.924521	0.842439	1.21185	0.758086	0.809717	1.12892	0.798433	1.0405	0.529284	0.932668	0.807787	0.833178	0.867576	0.810535	0.997865	0.608334	0.79112	0.837791
	4.32962	1.26475	0.927031	0.866984	0.815227	0.881906	0.590788	0.796932	0.818549	0.792902	1.13803	0.84939	0.795027	1.0432	0.899817	0.908989	0.631192	0.911117	1.32627	0.833694	0.665981	0.850111	0.780766	0.825265	0.852143	1.0189	0.723712	0.678889	0.542164	0.892012	1.07156	0.942423	0.822446	1.13098	0.777419	0.798189	1.14328	0.806394	1.04967	0.517426	0.958511	0.796235	0.842803	0.843033	0.781101	1.01565	0.59096	0.819181	0.771521
	4.36288	1.27584	0.966999	0.864555	0.81664	0.849009	0.610259	0.797793	0.820285	0.741517	1.12875	0.836458	0.763962	1.03631	0.912739	0.906449	0.645689	0.884468	1.39365	0.854615	0.659593	0.808293	0.772973	0.786874	0.831826	1.03528	0.71854	0.670665	0.526144	0.922808	1.05844	0.84173	0.794449	1.18545	0.742583	0.782038	1.20815	0.785608	1.00582	0.513391	0.956413	0.795886	0.834058	0.830056	0.78042	1.01609	0.610541	0.785618	0.861825
	4.39632	1.35447	0.937003	0.821322	0.852191	0.882569	0.628157	0.744363	0.795692	0.821878	1.07112	0.825222	0.763049	1.00464	0.894466	0.866403	0.617637	0.963872	1.38294	0.868424	0.667354	0.837971	0.756385	0.756208	0.809961	1.04149	0.71379	0.669177	0.53642	0.89983	1.03733	0.909024	0.812836	1.15234	0.749606	0.813985	1.1607	0.777265	1.00523	0.503001	1.0102	0.792894	0.814701	0.845242	0.796472	1.00215	0.613052	0.781245	0.838649
	4.42957	1.29256	0.923339	0.848331	0.847756	0.881352	0.601165	0.735495	0.802921	0.770198	1.05955	0.811337	0.768655	1.00862	0.888479	0.885613	0.570149	0.900156	1.37502	0.837817	0.660676	0.810419	0.782234	0.783434	0.835087	1.02842	0.688537	0.671339	0.533885	0.898792	1.05639	0.914642	0.820738	1.1618	0.773797	0.745466	1.12536	0.773356	1.00041	0.492854	1.01105	0.799754	0.853863	0.839772	0.797947	0.968437	0.573	0.765662	0.815964
	4.46298	1.24182	0.926939	0.791163	0.810431	0.861087	0.599263	0.740399	0.758975	0.765712	1.00575	0.774038	0.726294	0.980481	0.893695	0.853727	0.554656	0.930999	1.31135	0.826667	0.658398	0.797763	0.744494	0.771384	0.832906	0.980106	0.701513	0.659167	0.50977	0.879956	1.05837	0.902258	0.794114	1.14867	0.72296	0.784705	1.10383	0.771053	0.969995	0.506337	1.0214	0.796593	0.802471	0.812457	0.763204	0.931232	0.576866	0.765815	0.815149
	4.4963	1.22207	0.939258	0.773917	0.824929	0.808571	0.578251	0.728245	0.773396	0.751748	1.04847	0.772649	0.746783	1.02878	0.848471	0.860445	0.563296	0.974649	1.31652	0.794449	0.646496	0.800254	0.723566	0.776761	0.821712	1.00358	0.705629	0.627839	0.516432	0.904341	0.965484	0.882316	0.812512	1.12644	0.70389	0.796616	1.12563	0.755357	0.985632	0.512017	0.954742	0.789379	0.816177	0.816618	0.779928	0.943579	0.584685	0.765407	0.771578
	4.52962	1.15384	0.915792	0.753521	0.816352	0.823032	0.58801	0.714096	0.812499	0.743686	1.02105	0.75678	0.70557	0.976093	0.872681	0.861201	0.572298	0.909639	1.27186	0.824094	0.649364	0.76405	0.7249	0.809079	0.809695	1.01159	0.703524	0.606199	0.514708	0.896933	1.00854	0.876624	0.808182	1.16932	0.758882	0.767515	1.17876	0.744417	0.954433	0.503043	0.956524	0.764518	0.797557	0.787736	0.783914	0.931323	0.571405	0.755406	0.824176
	4.563	1.22287	0.907771	0.741585	0.816917	0.811876	0.563363	0.675959	0.782332	0.748251	1.00893	0.757971	0.72715	0.95198	0.869363	0.844794	0.552534	0.899667	1.30093	0.814974	0.642488	0.736215	0.766678	0.768551	0.793255	0.989902	0.722773	0.609598	0.496806	0.890763	1.02081	0.87774	0.805992	1.1708	0.727369	0.753782	1.17465	0.746462	0.969106	0.483307	0.982207	0.76552	0.809773	0.804947	0.759815	0.946108	0.580297	0.768808	0.811755
	4.5963	1.25081	0.900147	0.710619	0.789468	0.80111	0.591295	0.687017	0.770606	0.733124	1.00883	0.760157	0.72896	0.987229	0.87351	0.876201	0.541283	0.896167	1.33368	0.832476	0.633164	0.745639	0.704745	0.775298	0.829885	1.0205	0.702996	0.63794	0.523486	0.892603	1.00207	0.895593	0.85693	1.17986	0.739067	0.766201	1.17613	0.724822	0.926818	0.486195	0.957675	0.776119	0.740631	0.80933	0.75328	0.977275	0.566376	0.74782	0.814032
	4.62965	1.19795	0.880455	0.706412	0.756839	0.797077	0.586789	0.670599	0.741563	0.71657	0.983346	0.714023	0.737553	0.96924	0.839099	0.849964	0.540446	0.901501	1.27735	0.843905	0.614304	0.760853	0.690828	0.753747	0.780477	0.997016	0.720466	0.612717	0.488128	0.889684	0.990567	0.850642	0.829225	1.13025	0.709847	0.73788	1.17018	0.717756	0.924077	0.48328	0.952515	0.766751	0.789354	0.783681	0.744809	0.971372	0.544646	0.722592	0.830693
	4.66297	1.11857	0.858853	0.659885	0.809605	0.827247	0.584361	0.636899	0.787767	0.735489	0.987749	0.727567	0.71575	0.995787	0.843904	0.852201	0.525251	0.85433	1.31073	0.771248	0.638332	0.755056	0.715291	0.744505	0.83571	1.00161	0.699691	0.610849	0.488237	0.886131	1.00422	0.895876	0.81124	1.12264	0.709786	0.760866	1.12956	0.710606	0.917672	0.475047	0.954561	0.747967	0.773565	0.775264	0.748829	0.948412	0.536134	0.73841	0.760123
	4.69622	1.15734	0.896	0.6367	0.78519	0.809051	0.574364	0.659413	0.758309	0.700077	0.93884	0.72436	0.716227	0.953711	0.82803	0.868107	0.534043	0.831381	1.28282	0.790877	0.637442	0.734783	0.716512	0.765565	0.800112	0.960992	0.679339	0.626684	0.498007	0.896873	0.973511	0.888741	0.818601	1.11003	0.722944	0.759882	1.07812	0.690886	0.916434	0.458606	0.914366	0.745873	0.741525	0.769204	0.74789	0.955942	0.536394	0.749673	0.780753
	4.7296	1.19293	0.848308	0.594895	0.780458	0.768632	0.573977	0.630942	0.764603	0.69351	0.985354	0.701542	0.706471	0.987575	0.843128	0.826412	0.51319	0.870539	1.30869	0.807815	0.61774	0.758989	0.712499	0.7528	0.792193	1.00844	0.658188	0.625391	0.490933	0.903056	0.980286	0.87335	0.823111	1.10717	0.711118	0.758773	1.05496	0.707389	0.915133	0.462657	0.898338	0.739017	0.763438	0.747266	0.759848	0.968279	0.569041	0.745838	0.757001
	4.76293	1.17101	0.82598	0.610455	0.763208	0.743031	0.538328	0.622534	0.769381	0.678633	0.934238	0.709733	0.706843	0.997982	0.806581	0.829416	0.482113	0.861506	1.3129	0.790423	0.613759	0.738717	0.691833	0.728327	0.783557	1.01773	0.668446	0.611817	0.484446	0.859697	0.971922	0.882926	0.80066	1.13773	0.735189	0.721877	1.008	0.672842	0.86542	0.470777	0.854428	0.728658	0.741216	0.735517	0.719997	0.898839	0.535397	0.712507	0.775232
	4.79625	1.02916	0.88846	0.594827	0.773062	0.765104	0.522032	0.609193	0.76737	0.73866	0.981578	0.724295	0.673366	0.981944	0.852393	0.829054	0.516036	0.864297	1.29229	0.798489	0.616282	0.723948	0.705398	0.75891	0.790104	0.979025	0.657988	0.611289	0.490237	0.863741	1.0023	0.851324	0.794805	1.15551	0.693008	0.758387	1.0037	0.704337	0.944697	0.461996	0.845728	0.745156	0.744307	0.745204	0.744242	0.934748	0.536221	0.724265	0.790429
	4.82962	1.11313	0.846404	0.586267	0.778151	0.775627	0.559582	0.614622	0.778035	0.706227	0.950125	0.708504	0.702571	0.970807	0.85316	0.842466	0.491436	0.810766	1.23591	0.779193	0.630388	0.777583	0.719431	0.760576	0.769824	1.01994	0.663912	0.589574	0.497502	0.869386	0.982616	0.860265	0.788946	1.09473	0.730563	0.739439	0.948554	0.668315	0.890623	0.45402	0.825112	0.732793	0.749194	0.731565	0.742204	0.909923	0.50995	0.736709	0.778629
	4.86293	1.11494	0.803535	0.590932	0.772479	0.736083	0.533827	0.585213	0.770019	0.693309	0.923328	0.701943	0.651966	0.978578	0.828362	0.828424	0.503784	0.765708	1.28606	0.772006	0.587705	0.756808	0.703138	0.748475	0.756301	0.972188	0.663094	0.589837	0.488035	0.849172	0.952213	0.854103	0.823941	1.10737	0.662009	0.729702	0.954902	0.652312	0.882514	0.439215	0.819224	0.696664	0.687504	0.755513	0.705201	0.89179	0.546382	0.732263	0.757812
	4.89632	1.10213	0.780833	0.53151	0.715274	0.749352	0.540567	0.584067	0.739212	0.699323	0.934105	0.695079	0.672747	0.967664	0.855332	0.829554	0.503525	0.83287	1.2679	0.768665	0.597179	0.731049	0.68514	0.769588	0.756259	0.991988	0.661794	0.608978	0.507566	0.899325	0.993752	0.842761	0.799431	1.08248	0.654701	0.778011	0.925176	0.654702	0.857277	0.459441	0.757727	0.695023	0.748666	0.71436	0.683838	0.903042	0.495525	0.721727	0.751829
	4.92963	1.10495	0.769645	0.529481	0.738352	0.718823	0.514596	0.59189	0.754893	0.677637	0.936984	0.665988	0.655697	0.930412	0.834652	0.80797	0.484579	0.798953	1.23345	0.740264	0.60139	0.734116	0.709945	0.746593	0.762753	0.921777	0.656905	0.612547	0.489493	0.868198	0.983107	0.848457	0.791037	1.11625	0.700699	0.745773	0.862524	0.663756	0.881473	0.435525	0.776599	0.713605	0.752136	0.72872	0.717668	0.900707	0.519891	0.705021	0.722087
	4.96295	1.14491	0.745877	0.513256	0.742482	0.709928	0.5372	0.59073	0.733645	0.661047	0.83748	0.673912	0.651559	0.932133	0.814502	0.80121	0.469241	0.788066	1.22645	0.730738	0.577841	0.736911	0.7035	0.730773	0.730916	0.967183	0.616829	0.567881	0.480382	0.871011	0.923116	0.846856	0.81426	1.10311	0.705129	0.717058	0.860547	0.654831	0.859276	0.439842	0.745692	0.719058	0.719372	0.713098	0.734094	0.874923	0.501246	0.738437	0.757769
	4.99632	1.09798	0.753404	0.497357	0.733038	0.689659	0.522618	0.572625	0.71949	0.650072	0.84839	0.628886	0.640604	0.899544	0.785896	0.834365	0.486759	0.744515	1.23166	0.736107	0.586586	0.724937	0.703075	0.726764	0.72182	0.917767	0.59674	0.57554	0.475256	0.850308	0.926172	0.804617	0.797357	1.0319	0.690148	0.711947	0.81691	0.647107	0.832489	0.42829	0.760637	0.686655	0.676543	0.708613	0.688712	0.89515	0.485093	0.674297	0.733641
	5.02962	1.06652	0.782543	0.517861	0.720595	0.706588	0.538635	0.563171	0.752875	0.695032	0.884626	0.645951	0.647605	0.964983	0.848667	0.812171	0.469328	0.765476	1.21598	0.789302	0.551337	0.704954	0.7357	0.707513	0.723658	0.975759	0.665515	0.607371	0.4917	0.867602	0.932036	0.842308	0.813117	1.05012	0.650686	0.710343	0.811866	0.633537	0.857199	0.43799	0.757334	0.679529	0.699783	0.724302	0.681367	0.876349	0.492947	0.696355	0.723829
	5.0629	1.13688	0.772292	0.523623	0.726041	0.687178	0.522473	0.554246	0.715035	0.674378	0.870091	0.654129	0.636687	0.931579	0.813058	0.80985	0.478464	0.749554	1.29333	0.78708	0.581815	0.689599	0.68208	0.701805	0.743802	0.99597	0.67895	0.586812	0.475086	0.847438	0.977884	0.827324	0.818381	1.05504	0.664582	0.738369	0.77596	0.63314	0.825989	0.435822	0.742018	0.688679	0.665738	0.687252	0.676432	0.872985	0.491347	0.704059	0.726127
	5.0963	1.00982	0.721929	0.469407	0.720605	0.69788	0.523029	0.547955	0.727953	0.67393	0.869461	0.621653	0.598979	0.912734	0.804264	0.80382	0.47159	0.737436	1.27682	0.740171	0.573683	0.727557	0.684605	0.728432	0.715185	0.945136	0.641081	0.558141	0.47749	0.862164	0.967691	0.828832	0.783066	1.04671	0.690677	0.711853	0.753729	0.622043	0.885686	0.408064	0.74486	0.666233	0.697205	0.689696	0.672425	0.85425	0.484918	0.689839	0.695651
	5.12963	1.04445	0.75075	0.475355	0.685128	0.69834	0.514877	0.555669	0.725651	0.652217	0.88559	0.624625	0.621761	0.928868	0.818765	0.815277	0.479552	0.763943	1.26783	0.754016	0.5661	0.708379	0.686794	0.717488	0.736884	0.973901	0.637156	0.560742	0.483063	0.834484	1.01298	0.78864	0.801687	1.03299	0.654373	0.697601	0.745487	0.629474	0.845031	0.424747	0.674237	0.665274	0.700738	0.692032	0.696404	0.845641	0.487449	0.685609	0.714484
	5.16295	0.962949	0.721381	0.489694	0.716107	0.689856	0.546858	0.541807	0.752251	0.617451	0.851968	0.632827	0.643942	0.897357	0.818755	0.787679	0.472156	0.771129	1.16863	0.724043	0.580158	0.725402	0.663167	0.716114	0.727094	1.0046	0.640116	0.574952	0.4795	0.858479	1.0208	0.798475	0.811658	0.987125	0.656953	0.725074	0.752832	0.585255	0.806027	0.414553	0.66377	0.675976	0.69039	0.661458	0.657995	0.816387	0.487221	0.700021	0.708491
	5.1963	1.01066	0.698409	0.465649	0.742105	0.697185	0.527779	0.539941	0.715438	0.614342	0.830442	0.623548	0.631435	0.909835	0.798243	0.789978	0.452631	0.769945	1.23895	0.719442	0.574536	0.720118	0.68819	0.722728	0.673696	0.930668	0.644455	0.563877	0.477361	0.846805	0.976825	0.836293	0.795986	1.03257	0.658791	0.707664	0.72994	0.612285	0.810482	0.414446	0.642276	0.644988	0.680523	0.669949	0.667447	0.82814	0.466724	0.6878	0.732795
	5.22962	1.01299	0.716077	0.470593	0.69888	0.696252	0.523308	0.539787	0.716105	0.635868	0.8786	0.636126	0.626573	0.900037	0.784343	0.794284	0.453686	0.759521	1.24562	0.719188	0.563083	0.705881	0.691703	0.705593	0.700524	0.926484	0.634404	0.580549	0.473016	0.853694	1.01167	0.801914	0.773598	1.0073	0.67107	0.692079	0.692174	0.62167	0.811786	0.428389	0.662225	0.683426	0.712136	0.678072	0.671424	0.853082	0.475807	0.690598	0.699936
	5.26295	0.939767	0.724323	0.466704	0.714625	0.672645	0.538688	0.534983	0.696066	0.605196	0.865411	0.622064	0.604146	0.909858	0.797925	0.773285	0.43324	0.747626	1.27159	0.710836	0.543234	0.686713	0.663212	0.717441	0.716594	0.946731	0.631913	0.559087	0.455054	0.824632	1.05157	0.8054	0.76863	1.01155	0.619773	0.701477	0.684459	0.596828	0.818889	0.413488	0.616548	0.67043	0.63547	0.673451	0.655521	0.863298	0.490535	0.703238	0.710569
	5.29632	0.994997	0.650844	0.443534	0.685145	0.68782	0.481185	0.529121	0.707787	0.59814	0.878666	0.60673	0.602856	0.898784	0.788247	0.797314	0.451686	0.774873	1.18741	0.747543	0.566267	0.718793	0.675014	0.679478	0.691263	0.969787	0.60845	0.549902	0.461501	0.837979	1.0401	0.807174	0.782585	0.981634	0.634796	0.701026	0.679201	0.610776	0.801829	0.417578	0.62821	0.660762	0.619794	0.651559	0.670787	0.828951	0.467833	0.686786	0.726673
	5.32957	0.939513	0.668694	0.440653	0.681677	0.65918	0.486069	0.52639	0.697842	0.630281	0.822813	0.606337	0.597454	0.913407	0.762029	0.765172	0.449321	0.736409	1.15403	0.721192	0.551328	0.700349	0.627164	0.670023	0.718607	0.912014	0.597641	0.549378	0.463506	0.812808	1.03969	0.773354	0.796155	0.962348	0.611879	0.72844	0.659579	0.59711	0.808637	0.386572	0.595995	0.655523	0.695427	0.654146	0.709969	0.824045	0.468146	0.662821	0.68434
	5.36292	0.961074	0.64439	0.432975	0.676123	0.659341	0.492499	0.514269	0.691544	0.602033	0.834034	0.602199	0.584382	0.867385	0.772019	0.785347	0.423333	0.752251	1.22669	0.722206	0.571439	0.709516	0.674997	0.702343	0.692405	0.897182	0.648137	0.555905	0.456929	0.791047	0.995049	0.807882	0.771045	0.981396	0.630999	0.722386	0.630842	0.602867	0.761664	0.388433	0.582105	0.635103	0.609879	0.643233	0.663341	0.812683	0.460723	0.669928	0.656251
	5.39622	0.903092	0.644092	0.428367	0.676653	0.631314	0.485335	0.494905	0.691709	0.607946	0.852296	0.590163	0.563752	0.866647	0.752888	0.766274	0.426729	0.709442	1.14254	0.705733	0.571352	0.712413	0.665722	0.656818	0.675658	0.885899	0.604712	0.570223	0.446309	0.805962	1.02957	0.787985	0.756085	0.934763	0.643799	0.693173	0.614048	0.593499	0.780504	0.414034	0.553227	0.647474	0.64097	0.623546	0.657415	0.783959	0.465828	0.655574	0.663701
	5.42962	0.996205	0.642677	0.406803	0.702353	0.643316	0.463495	0.49492	0.679919	0.576773	0.854871	0.588452	0.589734	0.893004	0.76545	0.738827	0.4327	0.74495	1.22217	0.685507	0.55327	0.71063	0.695938	0.704178	0.718899	0.914628	0.598355	0.546768	0.452144	0.79602	1.0161	0.77567	0.760707	0.953861	0.631698	0.682771	0.611714	0.563539	0.767441	0.397301	0.536822	0.637388	0.642839	0.636768	0.649638	0.809708	0.454479	0.666418	0.69744
	5.46295	0.977544	0.661968	0.399049	0.697795	0.65983	0.486003	0.51516	0.699669	0.602021	0.790184	0.571695	0.598697	0.89142	0.751373	0.769579	0.428292	0.760902	1.17127	0.699225	0.552676	0.692228	0.669751	0.676635	0.663994	0.936943	0.62421	0.535282	0.461801	0.81357	1.01789	0.781813	0.749234	0.92351	0.590904	0.696964	0.582733	0.580375	0.753779	0.408699	0.547777	0.646524	0.605556	0.628658	0.63925	0.816179	0.453942	0.65278	0.699776
	5.49632	0.908199	0.659694	0.403682	0.683223	0.616626	0.484305	0.48385	0.666478	0.575974	0.798687	0.594252	0.583622	0.860489	0.761234	0.750109	0.429426	0.772582	1.2315	0.715184	0.526607	0.68416	0.648642	0.665052	0.677768	0.911554	0.61017	0.524282	0.447328	0.791849	1.00304	0.769381	0.760663	0.915207	0.614049	0.684782	0.591962	0.57945	0.762853	0.404999	0.545861	0.64901	0.632448	0.619643	0.638523	0.820876	0.475678	0.645838	0.660439
	5.52962	0.927838	0.633918	0.403844	0.684335	0.615983	0.489004	0.510496	0.687327	0.578632	0.802072	0.574608	0.596485	0.885079	0.75451	0.723741	0.423924	0.757308	1.22868	0.686744	0.540644	0.701819	0.661764	0.662263	0.675632	0.924124	0.597196	0.545564	0.448709	0.788974	0.998363	0.775194	0.733617	0.929682	0.59219	0.662472	0.60862	0.584236	0.744092	0.415897	0.554129	0.617706	0.651937	0.616288	0.643604	0.757712	0.45969	0.679186	0.655008
	5.56298	0.964993	0.598013	0.395777	0.700575	0.616721	0.501992	0.522199	0.685301	0.560437	0.79564	0.568012	0.570531	0.858576	0.74145	0.772107	0.424678	0.756336	1.12153	0.713867	0.563861	0.686764	0.653924	0.665583	0.656452	0.894242	0.610121	0.555711	0.45062	0.800055	0.9745	0.755867	0.731725	0.906998	0.603096	0.693775	0.586991	0.55995	0.762584	0.396229	0.492352	0.634561	0.646437	0.614561	0.656254	0.792698	0.468648	0.631199	0.70524
	5.59627	0.968436	0.62347	0.393843	0.689685	0.583843	0.480782	0.508111	0.694728	0.576447	0.814418	0.555427	0.569265	0.854917	0.77553	0.74915	0.417303	0.736997	1.12591	0.695742	0.549151	0.677063	0.663711	0.669119	0.657544	0.904019	0.614341	0.55078	0.470872	0.770704	0.964836	0.759273	0.723302	0.903976	0.587081	0.692456	0.576465	0.556668	0.740583	0.415939	0.485234	0.641992	0.627376	0.604131	0.629887	0.783548	0.449938	0.645178	0.656623
	5.62963	0.922526	0.646151	0.398748	0.683008	0.621016	0.491211	0.530944	0.660656	0.555115	0.812899	0.568406	0.559396	0.872864	0.748128	0.749656	0.404894	0.763952	1.11349	0.648913	0.540364	0.697588	0.644829	0.638054	0.645192	0.928354	0.571105	0.535221	0.440353	0.788032	0.960019	0.748833	0.73421	0.887332	0.584973	0.676974	0.548503	0.584691	0.747931	0.400182	0.476168	0.632733	0.609682	0.610257	0.653723	0.767396	0.429562	0.654808	0.653383
	5.66297	0.913797	0.59813	0.406389	0.69041	0.611996	0.470224	0.550136	0.630596	0.559584	0.791413	0.552014	0.56161	0.849311	0.736691	0.742951	0.425743	0.704937	1.1276	0.684341	0.538578	0.652401	0.655168	0.674258	0.647819	0.888421	0.582719	0.52626	0.451381	0.758802	1.0071	0.765196	0.739008	0.885026	0.568716	0.671384	0.560001	0.572364	0.720486	0.385273	0.453194	0.62312	0.598958	0.589648	0.644961	0.744603	0.429059	0.644038	0.659769
	5.6963	0.937327	0.631134	0.396501	0.716373	0.608067	0.463249	0.592483	0.65137	0.576806	0.786977	0.555717	0.571749	0.831032	0.765668	0.719558	0.4135	0.702647	1.11004	0.698675	0.556067	0.673821	0.633959	0.664921	0.645465	0.914529	0.584368	0.52103	0.451491	0.781606	0.948784	0.753763	0.759999	0.92026	0.567988	0.676413	0.56647	0.542755	0.71384	0.39817	0.470493	0.622413	0.583588	0.613266	0.652009	0.796879	0.435711	0.634354	0.662384
	5.72963	0.919704	0.615022	0.380105	0.668271	0.587478	0.468508	0.585195	0.652843	0.546121	0.773968	0.54407	0.561049	0.866516	0.718108	0.717702	0.408946	0.732424	1.13302	0.681582	0.52558	0.654609	0.623394	0.653192	0.625743	0.896137	0.576805	0.528132	0.44864	0.772272	0.932467	0.745511	0.74929	0.914112	0.571951	0.681733	0.539504	0.551504	0.720234	0.382708	0.450739	0.615971	0.594837	0.603194	0.625026	0.801027	0.446574	0.645777	0.621231
	5.76295	0.899904	0.593737	0.371046	0.654797	0.561216	0.474038	0.576153	0.632449	0.544928	0.73657	0.530519	0.549015	0.875073	0.691379	0.720242	0.396844	0.709387	1.1266	0.654835	0.510283	0.642674	0.65438	0.649712	0.629154	0.909443	0.567809	0.525175	0.440211	0.743773	0.921297	0.734663	0.751462	0.880195	0.57387	0.687128	0.535865	0.527598	0.754259	0.412339	0.439529	0.611788	0.572286	0.573097	0.621901	0.756012	0.439654	0.623281	0.641971
	5.79627	0.902933	0.575674	0.383403	0.729929	0.621689	0.457769	0.543623	0.653081	0.518867	0.758496	0.549685	0.554487	0.812881	0.688478	0.706694	0.399448	0.708349	1.15414	0.68451	0.528805	0.647868	0.59178	0.61176	0.611264	0.935551	0.558215	0.522396	0.436865	0.735988	0.973494	0.726151	0.72885	0.838457	0.563035	0.635258	0.524888	0.537307	0.699265	0.397955	0.439336	0.621585	0.590664	0.5569	0.598615	0.739797	0.432227	0.640738	0.633255
	5.82962	0.9165	0.573657	0.389507	0.753755	0.571803	0.492552	0.551892	0.637419	0.528707	0.758568	0.539997	0.524201	0.8203	0.72222	0.716081	0.394076	0.706492	1.10637	0.643365	0.510301	0.678932	0.602234	0.611332	0.611237	0.885653	0.568999	0.498155	0.447741	0.763373	0.911287	0.720215	0.737136	0.851174	0.528019	0.670337	0.525791	0.52794	0.705312	0.399539	0.437966	0.614844	0.587776	0.5624	0.593078	0.705481	0.426931	0.65042	0.659425
	5.86295	0.837684	0.598326	0.378562	0.722867	0.539895	0.468984	0.539704	0.618309	0.517118	0.747161	0.5296	0.532181	0.813463	0.730797	0.708071	0.410213	0.673512	1.08717	0.660166	0.523174	0.700451	0.608337	0.621706	0.610916	0.880351	0.561548	0.516391	0.451071	0.765868	0.917426	0.688627	0.773975	0.874596	0.555117	0.646294	0.519467	0.537374	0.705921	0.394173	0.432194	0.596919	0.582283	0.583439	0.583761	0.731813	0.416604	0.628799	0.631481
	5.8963	0.880134	0.623367	0.377424	0.720823	0.57536	0.470412	0.548154	0.649934	0.518363	0.746001	0.529129	0.531238	0.823211	0.705424	0.725784	0.401597	0.691242	1.08807	0.684673	0.521096	0.651577	0.640307	0.592967	0.628044	0.901373	0.574006	0.524499	0.455186	0.741847	0.909887	0.70976	0.751904	0.877911	0.557404	0.649158	0.517256	0.535202	0.700731	0.378722	0.44566	0.619523	0.570104	0.58147	0.606705	0.753225	0.440862	0.624415	0.647897
	5.92962	0.868224	0.560476	0.383399	0.725429	0.553603	0.471446	0.521357	0.632235	0.529601	0.728076	0.544183	0.526025	0.834337	0.696182	0.713086	0.387778	0.689666	1.03719	0.708094	0.526163	0.639308	0.603682	0.630176	0.592806	0.878662	0.54714	0.522554	0.436006	0.739089	0.897077	0.703031	0.756292	0.86982	0.569197	0.628662	0.49611	0.51082	0.68719	0.388187	0.439609	0.605767	0.589381	0.57679	0.618826	0.734721	0.419063	0.625465	0.639529
	5.96297	0.853506	0.575271	0.356583	0.742974	0.542586	0.451142	0.518667	0.610373	0.527829	0.741254	0.536113	0.533581	0.828928	0.695593	0.7191	0.388948	0.659463	1.10276	0.653816	0.499712	0.656397	0.585668	0.618624	0.613976	0.889358	0.561891	0.49876	0.433568	0.719747	0.913542	0.706774	0.745847	0.834117	0.543635	0.635771	0.490509	0.528263	0.677006	0.40977	0.412749	0.600034	0.582418	0.563256	0.592713	0.741403	0.434161	0.61998	0.629923
	5.99628	0.862563	0.55578	0.361634	0.689158	0.566715	0.467377	0.50738	0.610754	0.517593	0.7148	0.533239	0.521458	0.814533	0.714246	0.702245	0.377209	0.654598	1.11316	0.629444	0.495068	0.659413	0.617154	0.60764	0.62317	0.890893	0.573433	0.526646	0.43365	0.723789	0.904966	0.693388	0.742328	0.834569	0.511834	0.64094	0.490599	0.529026	0.682018	0.377268	0.403255	0.602344	0.571957	0.557823	0.588292	0.676855	0.434835	0.615757	0.618932
	6.02967	0.882467	0.589023	0.355552	0.707218	0.555934	0.487191	0.50498	0.61066	0.508971	0.731698	0.533877	0.494552	0.831345	0.698049	0.685874	0.385066	0.652711	1.09501	0.665768	0.529011	0.647559	0.617533	0.631731	0.618409	0.847619	0.555743	0.520297	0.455493	0.723593	0.873203	0.661756	0.713185	0.888575	0.547907	0.650465	0.488784	0.495131	0.644644	0.389728	0.417434	0.582949	0.539916	0.551667	0.579188	0.703919	0.432146	0.613151	0.580117
	6.06295	0.847885	0.573281	0.367522	0.700846	0.525855	0.491899	0.493692	0.604456	0.501832	0.738928	0.526187	0.504588	0.810952	0.697568	0.707071	0.380059	0.656296	1.08912	0.621521	0.48761	0.659118	0.611399	0.60043	0.600542	0.845064	0.55918	0.514351	0.442181	0.714342	0.838247	0.683035	0.723736	0.855098	0.524943	0.643031	0.492608	0.49784	0.658647	0.389615	0.385883	0.589214	0.547262	0.562537	0.579635	0.702967	0.413937	0.595696	0.582314
	6.09627	0.86523	0.548272	0.356169	0.682948	0.539692	0.488644	0.472496	0.606001	0.496339	0.678831	0.523289	0.52707	0.803554	0.676409	0.6738	0.38445	0.651392	1.05646	0.665386	0.492663	0.615763	0.58348	0.581265	0.579194	0.813825	0.531685	0.52183	0.444985	0.720021	0.817152	0.651632	0.71084	0.835586	0.516748	0.642547	0.482037	0.501493	0.652894	0.38075	0.401773	0.601177	0.569712	0.562691	0.576709	0.703498	0.404531	0.591716	0.596413
	6.12963	0.87986	0.556745	0.363828	0.660631	0.545136	0.537813	0.471838	0.600481	0.53136	0.698087	0.505835	0.527722	0.809984	0.681026	0.682624	0.372526	0.644384	1.08212	0.656578	0.499935	0.647161	0.617087	0.597363	0.58296	0.834578	0.549683	0.51908	0.45113	0.715968	0.842902	0.677902	0.737297	0.834884	0.508695	0.637359	0.494346	0.493195	0.654866	0.366959	0.422287	0.5765	0.554614	0.555539	0.577771	0.715592	0.412048	0.603348	0.594316
	6.16295	0.866411	0.546466	0.351109	0.684538	0.518649	0.543933	0.476767	0.587354	0.49758	0.710234	0.496453	0.483647	0.821992	0.68318	0.678916	0.382402	0.673681	1.03701	0.6443	0.513663	0.623803	0.583768	0.59614	0.5873	0.843446	0.563157	0.503309	0.443795	0.701927	0.802488	0.670903	0.718212	0.840741	0.510781	0.623457	0.473905	0.496559	0.637465	0.389603	0.408669	0.57854	0.547085	0.550416	0.573289	0.698976	0.414728	0.596943	0.588969
	6.1963	0.842322	0.55198	0.354196	0.665678	0.490331	0.580725	0.461394	0.589204	0.504694	0.734463	0.491485	0.499145	0.801127	0.692935	0.686126	0.362393	0.599558	1.06225	0.598313	0.493629	0.626789	0.585163	0.574156	0.573015	0.84095	0.547325	0.512529	0.436378	0.69958	0.796636	0.648426	0.740804	0.847356	0.514066	0.630074	0.474978	0.495431	0.665741	0.385006	0.407765	0.567041	0.557874	0.530218	0.598787	0.689294	0.432909	0.586829	0.571377
	6.22963	0.816914	0.54393	0.360429	0.697982	0.525542	0.567711	0.441677	0.542598	0.468573	0.705744	0.484533	0.493464	0.811469	0.680864	0.665659	0.377881	0.641203	1.00815	0.6065	0.485799	0.629574	0.59927	0.594042	0.553376	0.785795	0.546121	0.503323	0.425957	0.69719	0.816808	0.653795	0.714723	0.810596	0.489357	0.645591	0.489256	0.499146	0.621789	0.366747	0.389569	0.559799	0.506336	0.538395	0.570286	0.675776	0.405504	0.612089	0.644663
	6.26295	0.819574	0.534276	0.353402	0.687748	0.53228	0.587264	0.44981	0.568859	0.492774	0.710731	0.502835	0.46279	0.804044	0.671168	0.671605	0.378435	0.678824	1.05966	0.648027	0.498807	0.632683	0.577121	0.585472	0.557813	0.844176	0.533397	0.510057	0.422001	0.699844	0.766068	0.677905	0.743064	0.790404	0.509782	0.636315	0.467596	0.480515	0.629768	0.401059	0.39038	0.565317	0.497955	0.535422	0.567233	0.671054	0.408027	0.564959	0.573426
	6.29628	0.813561	0.512537	0.358155	0.648967	0.502071	0.566936	0.43425	0.557398	0.490967	0.71349	0.495829	0.485633	0.813619	0.654904	0.685403	0.375076	0.615795	0.998173	0.666279	0.497259	0.623244	0.574714	0.583681	0.560622	0.776624	0.54656	0.503404	0.427748	0.696726	0.802809	0.633233	0.717694	0.790753	0.481827	0.602041	0.463936	0.472733	0.621096	0.393307	0.388201	0.555488	0.488738	0.520369	0.555052	0.710287	0.399658	0.574585	0.561066
	6.3296	0.774276	0.527038	0.350739	0.683522	0.531402	0.53888	0.442831	0.569353	0.480942	0.705451	0.491225	0.497604	0.770856	0.67303	0.659504	0.386389	0.625284	0.97536	0.624797	0.498212	0.62168	0.571945	0.571405	0.549839	0.792812	0.532023	0.511086	0.424931	0.667653	0.774214	0.652386	0.704042	0.772548	0.471071	0.621068	0.435943	0.489392	0.623935	0.370217	0.402701	0.561453	0.509581	0.506965	0.568826	0.643084	0.392008	0.597692	0.563494
	6.36298	0.756234	0.511766	0.346275	0.69222	0.497271	0.538942	0.424157	0.574134	0.489002	0.66639	0.490221	0.48542	0.808781	0.626491	0.666505	0.359375	0.609692	1.01161	0.616837	0.459425	0.621449	0.602778	0.558951	0.564414	0.817148	0.555953	0.490105	0.435174	0.685974	0.772706	0.646213	0.710137	0.776424	0.494491	0.589231	0.458037	0.486469	0.611617	0.371159	0.383406	0.564059	0.499643	0.503547	0.563543	0.66095	0.410977	0.577952	0.566377
	6.3963	0.814594	0.516443	0.3674	0.646782	0.490464	0.524542	0.434561	0.570653	0.466208	0.649436	0.493416	0.448877	0.789024	0.637938	0.678286	0.363282	0.627778	1.02088	0.585411	0.494395	0.622491	0.577538	0.582275	0.543586	0.808963	0.540214	0.490951	0.415852	0.694236	0.765196	0.642405	0.691039	0.781802	0.47492	0.619636	0.445699	0.457888	0.604655	0.384855	0.387838	0.545537	0.505941	0.499982	0.570348	0.63767	0.416334	0.572921	0.566986
	6.42962	0.821557	0.541403	0.349843	0.641082	0.50762	0.534109	0.43408	0.558118	0.472288	0.658391	0.478492	0.456093	0.782929	0.642439	0.670376	0.371154	0.592688	1.0038	0.627365	0.470927	0.600385	0.575167	0.549208	0.542791	0.754908	0.519398	0.482756	0.422625	0.666023	0.750985	0.641035	0.696892	0.779882	0.485583	0.605559	0.464129	0.469463	0.597237	0.38322	0.390074	0.558198	0.503086	0.493004	0.548711	0.647054	0.420604	0.58703	0.537834
	6.46295	0.788144	0.517056	0.353753	0.644064	0.509127	0.5275	0.426943	0.55431	0.477444	0.698537	0.483932	0.462781	0.773316	0.660217	0.648778	0.366118	0.621795	1.00385	0.593347	0.487325	0.611297	0.591164	0.564002	0.552817	0.761859	0.525381	0.501512	0.420348	0.678562	0.763334	0.624441	0.686015	0.75224	0.484898	0.594211	0.446307	0.471421	0.613085	0.385589	0.397124	0.526431	0.517456	0.508563	0.526642	0.670434	0.406964	0.584617	0.571451
	6.4963	0.778783	0.530915	0.355406	0.62386	0.495085	0.513504	0.428499	0.562997	0.472346	0.700019	0.488773	0.456342	0.770479	0.637643	0.664224	0.348291	0.595556	1.04931	0.60891	0.485271	0.566863	0.548083	0.557382	0.537305	0.781851	0.537272	0.503805	0.43476	0.677407	0.753949	0.632643	0.722566	0.774721	0.48568	0.581434	0.443994	0.449908	0.584018	0.379306	0.358922	0.562961	0.50215	0.518675	0.570659	0.681969	0.418442	0.573659	0.545836
	6.52958	0.762693	0.519561	0.340771	0.608886	0.495809	0.494047	0.421055	0.55882	0.467689	0.652624	0.475957	0.457825	0.761978	0.636116	0.643737	0.361104	0.600966	0.999221	0.625663	0.469882	0.624864	0.536297	0.536668	0.523643	0.788348	0.548447	0.503994	0.424586	0.640791	0.756164	0.628407	0.698606	0.742766	0.467762	0.578066	0.443847	0.460533	0.608512	0.393855	0.35407	0.54366	0.499697	0.481062	0.52586	0.65669	0.392549	0.56874	0.567454
	6.56295	0.745307	0.522868	0.345135	0.614317	0.452419	0.474932	0.41936	0.549088	0.472078	0.619432	0.475194	0.455457	0.751818	0.633062	0.641067	0.361849	0.610154	0.936491	0.603517	0.463794	0.594262	0.560053	0.545573	0.547425	0.769514	0.527304	0.511486	0.410482	0.655448	0.72317	0.639491	0.719454	0.719612	0.465514	0.566205	0.441144	0.473447	0.57381	0.388942	0.36622	0.518469	0.494198	0.512948	0.539626	0.650553	0.387377	0.559698	0.588743
	6.59632	0.786522	0.508316	0.352248	0.581641	0.47499	0.461387	0.412155	0.543161	0.450132	0.670448	0.468068	0.455874	0.769637	0.622101	0.633208	0.367459	0.562327	0.989966	0.617315	0.48499	0.591024	0.589802	0.540361	0.511112	0.760372	0.517257	0.484322	0.422193	0.645672	0.735662	0.619431	0.70276	0.762245	0.455018	0.597942	0.437419	0.449887	0.598254	0.391639	0.375607	0.51123	0.460152	0.492313	0.525106	0.659684	0.386892	0.557041	0.536782
	6.62958	0.76979	0.524107	0.352525	0.566669	0.479173	0.442634	0.43117	0.524435	0.471902	0.636501	0.471531	0.454788	0.746401	0.625205	0.627338	0.358268	0.624909	0.974496	0.574134	0.46994	0.596374	0.58341	0.535788	0.532702	0.769557	0.540553	0.494695	0.409822	0.639699	0.750022	0.649775	0.699509	0.736566	0.469232	0.564037	0.42342	0.457033	0.597304	0.393247	0.386472	0.537951	0.482602	0.493804	0.53536	0.662978	0.389118	0.531345	0.560806
	6.66295	0.788101	0.504109	0.35659	0.571511	0.492208	0.441524	0.413532	0.528771	0.449404	0.664011	0.467244	0.456312	0.744261	0.628543	0.650667	0.374035	0.555254	0.933783	0.564795	0.463579	0.574146	0.544451	0.525709	0.527012	0.733127	0.532993	0.492153	0.418032	0.613846	0.714801	0.643085	0.700756	0.746545	0.460775	0.564051	0.416735	0.456618	0.565085	0.40821	0.368435	0.54617	0.481433	0.479049	0.507532	0.627179	0.406274	0.551601	0.520492
	6.69628	0.753807	0.498401	0.3504	0.539738	0.496376	0.428515	0.391202	0.522923	0.441343	0.641789	0.461722	0.440549	0.764861	0.619737	0.631992	0.366176	0.61031	0.977582	0.598689	0.47247	0.598292	0.548516	0.519447	0.518129	0.722051	0.508999	0.477437	0.421829	0.641368	0.724597	0.654057	0.692581	0.718673	0.470357	0.586252	0.4287	0.466101	0.56834	0.389508	0.386589	0.532594	0.498946	0.482895	0.513988	0.62533	0.376724	0.555031	0.534365
	6.72957	0.764024	0.487825	0.353475	0.57339	0.479233	0.428847	0.398937	0.541054	0.449528	0.65213	0.451596	0.460055	0.739468	0.593695	0.631065	0.361458	0.571948	0.944046	0.597221	0.474005	0.59362	0.565176	0.52657	0.513048	0.730569	0.526057	0.472733	0.414587	0.61942	0.690359	0.634623	0.68578	0.731278	0.439961	0.597987	0.429591	0.467597	0.582871	0.383235	0.387353	0.529117	0.484829	0.473114	0.532096	0.638113	0.402215	0.535546	0.538572
	6.76292	0.757952	0.497525	0.342666	0.567486	0.482303	0.420787	0.399314	0.540945	0.444688	0.623376	0.44795	0.450547	0.728233	0.608462	0.628488	0.354522	0.580457	0.957198	0.567564	0.460781	0.605279	0.566418	0.508216	0.511553	0.708134	0.519375	0.470818	0.410897	0.626593	0.689855	0.632086	0.66116	0.690095	0.458156	0.580485	0.422564	0.442137	0.570475	0.360413	0.36318	0.519756	0.435146	0.492924	0.512256	0.608552	0.402667	0.533368	0.513751
	6.79632	0.763464	0.471892	0.342605	0.558947	0.451135	0.423192	0.392255	0.510554	0.465359	0.614755	0.447252	0.437467	0.722216	0.610989	0.609893	0.34798	0.563698	0.96834	0.584903	0.456311	0.597604	0.542414	0.507903	0.504166	0.701508	0.513852	0.469383	0.419048	0.597948	0.675469	0.625807	0.687904	0.701124	0.461887	0.546408	0.424706	0.450625	0.571514	0.373622	0.366103	0.534662	0.477012	0.477321	0.506335	0.627161	0.385196	0.518463	0.536182
	6.82965	0.778283	0.489541	0.359542	0.554561	0.481445	0.410422	0.407992	0.513998	0.454208	0.624033	0.464828	0.439716	0.725106	0.593579	0.598269	0.349162	0.56747	0.968851	0.566285	0.460272	0.566932	0.551865	0.505339	0.500986	0.740341	0.509707	0.461653	0.421503	0.605368	0.683428	0.628235	0.67111	0.704914	0.460724	0.574374	0.417959	0.451216	0.564537	0.393583	0.355917	0.526769	0.469209	0.478433	0.517859	0.629531	0.389301	0.54013	0.500738
	6.86297	0.765434	0.501121	0.365739	0.522797	0.444544	0.412115	0.397162	0.495464	0.450122	0.633335	0.440954	0.442852	0.721767	0.594737	0.602806	0.36379	0.560102	0.922418	0.573051	0.472887	0.582414	0.55032	0.512563	0.509982	0.743072	0.518133	0.462634	0.44119	0.632618	0.695969	0.640936	0.669814	0.700104	0.482238	0.560554	0.422008	0.466176	0.555005	0.357172	0.379945	0.530048	0.460658	0.47968	0.501927	0.593344	0.393587	0.528815	0.526995
	6.89632	0.747889	0.491013	0.348867	0.532373	0.484647	0.400659	0.394297	0.5095	0.454299	0.652116	0.446878	0.435114	0.712923	0.620952	0.597935	0.349666	0.579738	0.927034	0.562168	0.481359	0.610858	0.554244	0.507296	0.48434	0.701655	0.496032	0.46835	0.404578	0.601031	0.660809	0.604741	0.665261	0.698227	0.471859	0.546001	0.402577	0.446971	0.55062	0.371952	0.359099	0.52477	0.442061	0.476379	0.487576	0.623213	0.391562	0.506755	0.502202
	6.92962	0.759638	0.490564	0.3442	0.526382	0.453924	0.389754	0.384497	0.504804	0.462038	0.591215	0.46329	0.426483	0.733558	0.619439	0.597273	0.354286	0.542858	0.911891	0.569611	0.461884	0.564244	0.560157	0.496765	0.493795	0.706492	0.510624	0.469667	0.418406	0.600752	0.686713	0.60872	0.679445	0.689	0.488213	0.571433	0.406537	0.446167	0.547448	0.373949	0.356044	0.520653	0.469438	0.483766	0.512081	0.631019	0.388077	0.510624	0.497003
	6.96298	0.788786	0.484269	0.344432	0.53727	0.458785	0.392142	0.387414	0.511094	0.409975	0.593491	0.444634	0.433873	0.723602	0.62004	0.603676	0.344345	0.539613	0.905238	0.545524	0.463382	0.564904	0.518046	0.496716	0.484998	0.678483	0.522656	0.466074	0.409194	0.606027	0.696345	0.63479	0.686983	0.684518	0.477467	0.555256	0.411163	0.43205	0.543023	0.385507	0.378495	0.513363	0.45815	0.472773	0.487104	0.607384	0.385499	0.53126	0.493344
	6.99627	0.772523	0.469192	0.348275	0.536205	0.471394	0.39563	0.380624	0.510509	0.430849	0.593015	0.4527	0.428	0.734397	0.605652	0.582627	0.360131	0.551686	0.912982	0.579912	0.458812	0.582391	0.539699	0.507129	0.49171	0.670184	0.525968	0.474241	0.427324	0.573846	0.64552	0.627502	0.662266	0.670057	0.482867	0.543629	0.397127	0.444692	0.543741	0.36331	0.375243	0.528371	0.472649	0.467121	0.491969	0.599105	0.380323	0.517271	0.501628
	7.02962	0.776893	0.483457	0.348556	0.508426	0.433161	0.375528	0.383052	0.511732	0.454798	0.614954	0.452633	0.443831	0.714074	0.607522	0.595709	0.362811	0.555469	0.95054	0.539635	0.454169	0.586872	0.522073	0.491543	0.48281	0.681839	0.504485	0.48782	0.433153	0.597933	0.658823	0.621204	0.669617	0.6639	0.453933	0.53308	0.398709	0.449433	0.536686	0.354609	0.355626	0.504742	0.441523	0.464753	0.500489	0.619329	0.384987	0.526184	0.478441
	7.06295	0.791359	0.484181	0.328258	0.521436	0.454589	0.386772	0.384081	0.508238	0.459447	0.593866	0.437246	0.421201	0.692896	0.601986	0.587773	0.341577	0.544455	0.89315	0.579956	0.455342	0.545936	0.543133	0.499897	0.47213	0.664149	0.498186	0.471453	0.412045	0.583383	0.660575	0.615664	0.650667	0.673944	0.489532	0.516115	0.408211	0.426499	0.521311	0.379039	0.389118	0.514466	0.436106	0.459156	0.502552	0.602649	0.374075	0.528517	0.4867
	7.0963	0.769328	0.482905	0.338304	0.500226	0.43343	0.374056	0.394968	0.483823	0.432844	0.599856	0.432259	0.423265	0.685777	0.5946	0.586206	0.344218	0.551321	0.902851	0.565253	0.452144	0.540264	0.529919	0.494387	0.489776	0.666322	0.513732	0.467779	0.415956	0.578196	0.620339	0.622577	0.649645	0.658214	0.473405	0.533611	0.406167	0.425034	0.519638	0.367171	0.365112	0.505585	0.445726	0.460356	0.498795	0.599607	0.383889	0.506777	0.491707
	7.12963	0.762535	0.468468	0.330414	0.483264	0.466101	0.378203	0.384819	0.519229	0.404901	0.616177	0.433687	0.411943	0.678797	0.615966	0.608087	0.361299	0.555487	0.857637	0.52513	0.428409	0.571526	0.517487	0.506014	0.484694	0.665848	0.492489	0.462977	0.416377	0.569815	0.623516	0.602802	0.63679	0.6478	0.454251	0.518865	0.395152	0.42468	0.530949	0.360835	0.371776	0.496164	0.463489	0.445818	0.496408	0.614666	0.380815	0.507879	0.466401
	7.16297	0.751595	0.438434	0.345872	0.492769	0.431109	0.361902	0.383955	0.48454	0.436804	0.602086	0.446326	0.428996	0.674157	0.610043	0.569597	0.347455	0.591769	0.951311	0.555148	0.443946	0.552363	0.532321	0.495616	0.483261	0.668478	0.495695	0.47309	0.410949	0.56079	0.6399	0.612534	0.648896	0.645103	0.461957	0.520818	0.424075	0.425067	0.548903	0.375794	0.356767	0.504591	0.440569	0.452841	0.487312	0.617276	0.379256	0.51372	0.469688
	7.19628	0.729329	0.481276	0.328534	0.490231	0.451565	0.372058	0.384747	0.494867	0.451721	0.594848	0.446411	0.417905	0.686449	0.596625	0.577965	0.354085	0.583954	0.937845	0.542817	0.458787	0.54988	0.518478	0.517564	0.481156	0.650653	0.494779	0.462613	0.417691	0.577221	0.643943	0.618983	0.667784	0.629292	0.432942	0.52285	0.383665	0.422545	0.536113	0.369732	0.376956	0.515258	0.460011	0.465434	0.493007	0.586065	0.373033	0.502884	0.483815
	7.22958	0.781595	0.477511	0.335639	0.506682	0.451352	0.363718	0.378191	0.477029	0.438535	0.571682	0.425948	0.403404	0.67647	0.618157	0.583891	0.345328	0.549541	0.915602	0.502957	0.430989	0.530434	0.504845	0.492015	0.483826	0.668694	0.492526	0.46793	0.430322	0.570585	0.629255	0.60871	0.6353	0.638543	0.457758	0.519022	0.401014	0.426175	0.531176	0.375793	0.347791	0.488998	0.424627	0.45989	0.51127	0.566079	0.381093	0.509754	0.492905
	7.26293	0.708798	0.491687	0.345905	0.477745	0.437305	0.365282	0.381841	0.485237	0.418524	0.567651	0.432223	0.430741	0.686379	0.601616	0.577042	0.371537	0.546684	0.899128	0.539653	0.446403	0.549026	0.527219	0.488177	0.469227	0.668163	0.489639	0.456561	0.420797	0.575095	0.608431	0.628675	0.63498	0.651113	0.432279	0.522001	0.398518	0.435403	0.528291	0.380519	0.378897	0.490447	0.444264	0.473389	0.487142	0.606763	0.366156	0.497973	0.477269
	7.2963	0.779904	0.468119	0.368316	0.487585	0.456615	0.372069	0.372347	0.469666	0.428886	0.578361	0.433585	0.418654	0.687099	0.596319	0.566365	0.359213	0.516936	0.878303	0.55064	0.461151	0.546134	0.540508	0.487237	0.457806	0.650606	0.491859	0.470989	0.416299	0.573775	0.604294	0.609232	0.631318	0.638651	0.42698	0.513468	0.419015	0.41358	0.525342	0.374831	0.381181	0.499354	0.43558	0.44835	0.493137	0.5944	0.378183	0.493255	0.483674
	7.32963	0.746385	0.45638	0.344785	0.476573	0.429405	0.360512	0.372737	0.483387	0.421618	0.57019	0.413328	0.404979	0.656598	0.584313	0.564872	0.34665	0.564238	0.876998	0.497647	0.438359	0.546742	0.459303	0.495189	0.48378	0.623966	0.472286	0.435922	0.445662	0.552488	0.598641	0.597191	0.649696	0.639472	0.443268	0.511894	0.401897	0.403863	0.522079	0.393266	0.349101	0.487473	0.412406	0.4421	0.484379	0.613154	0.382202	0.497417	0.475437
	7.36297	0.776962	0.451049	0.327634	0.475576	0.423222	0.361708	0.382968	0.463113	0.443648	0.602152	0.429117	0.409019	0.664608	0.585308	0.573352	0.353333	0.563631	0.890407	0.523889	0.440776	0.528273	0.474372	0.487387	0.467768	0.63186	0.510346	0.454277	0.419359	0.54822	0.596061	0.575408	0.649834	0.637301	0.438408	0.509167	0.374969	0.40405	0.505689	0.384493	0.354792	0.488114	0.433149	0.469059	0.465758	0.547151	0.383962	0.474691	0.462146
	7.39627	0.756724	0.446192	0.324306	0.457112	0.421307	0.344531	0.368032	0.494338	0.40625	0.582421	0.434093	0.415938	0.674868	0.595127	0.541621	0.361778	0.526307	0.879379	0.507302	0.448471	0.522666	0.522394	0.472171	0.466135	0.635149	0.481999	0.460965	0.426998	0.553664	0.591518	0.592089	0.652542	0.607158	0.429107	0.509129	0.395596	0.405765	0.502218	0.360525	0.379584	0.48893	0.425736	0.442518	0.489451	0.601918	0.379554	0.458066	0.477926
	7.42963	0.784287	0.456946	0.349203	0.462923	0.444026	0.35763	0.380346	0.483746	0.427934	0.577796	0.431543	0.412268	0.676403	0.588862	0.556993	0.344156	0.541515	0.884208	0.539669	0.474602	0.527059	0.504875	0.489161	0.467299	0.652683	0.481753	0.457327	0.422657	0.549025	0.604466	0.588792	0.631595	0.61754	0.412789	0.49646	0.380243	0.409511	0.514446	0.403252	0.354876	0.499419	0.418375	0.445835	0.486947	0.551711	0.390912	0.494222	0.483906
	7.46297	0.79303	0.448906	0.33873	0.451712	0.422982	0.370867	0.376261	0.471692	0.421182	0.574281	0.433357	0.406212	0.668166	0.572054	0.559574	0.340614	0.530452	0.872067	0.514468	0.450089	0.50481	0.484867	0.469883	0.444345	0.612693	0.477262	0.464939	0.418391	0.543147	0.600011	0.585308	0.653359	0.609184	0.417554	0.491292	0.386344	0.414439	0.524065	0.373967	0.378853	0.509188	0.401064	0.459963	0.473347	0.559915	0.362694	0.472843	0.462841
	7.49628	0.745404	0.422458	0.347881	0.484152	0.408479	0.35589	0.368567	0.463659	0.398501	0.524585	0.432169	0.387934	0.648266	0.563139	0.538657	0.335492	0.523896	0.873877	0.503023	0.455421	0.523656	0.496665	0.488858	0.457731	0.611366	0.499277	0.44632	0.420582	0.519158	0.565842	0.608589	0.627454	0.601883	0.400759	0.49225	0.383905	0.395098	0.484973	0.373826	0.366545	0.478277	0.417964	0.429792	0.479124	0.581677	0.347695	0.46219	0.43236
	7.52963	0.746551	0.465844	0.342648	0.460021	0.433852	0.363809	0.368462	0.465429	0.394454	0.572055	0.418506	0.404398	0.663736	0.563832	0.550679	0.360831	0.522491	0.917881	0.496515	0.430145	0.523261	0.500106	0.470841	0.47384	0.609069	0.487539	0.459269	0.412273	0.522248	0.567731	0.602534	0.612898	0.592665	0.396142	0.50688	0.385103	0.416268	0.497012	0.357598	0.359123	0.496944	0.438388	0.442425	0.470532	0.571889	0.374929	0.4747	0.4694
	7.56298	0.736702	0.447335	0.328474	0.495307	0.428053	0.335964	0.368341	0.448221	0.40039	0.550909	0.39673	0.415212	0.647967	0.543981	0.541415	0.339724	0.536278	0.853332	0.498796	0.441072	0.498647	0.469003	0.462685	0.429817	0.605881	0.498009	0.440691	0.412594	0.524883	0.554821	0.60487	0.625348	0.58379	0.397509	0.500306	0.378896	0.412015	0.502316	0.376588	0.360769	0.48706	0.40783	0.432471	0.476827	0.554619	0.37533	0.459726	0.450983
	7.5963	0.740376	0.42356	0.351252	0.466187	0.39677	0.339424	0.367746	0.475171	0.404495	0.554134	0.415988	0.4212	0.633603	0.557013	0.527648	0.318132	0.520529	0.864551	0.496218	0.442065	0.504745	0.481749	0.475537	0.4386	0.601814	0.470379	0.437873	0.410153	0.520975	0.556381	0.591604	0.610706	0.565089	0.410462	0.461647	0.374738	0.381885	0.495902	0.357748	0.362092	0.470737	0.429945	0.446331	0.460001	0.531492	0.360633	0.434865	0.42623
	7.6296	0.743979	0.425415	0.349417	0.446506	0.40202	0.361644	0.364944	0.460811	0.418229	0.56927	0.40739	0.4141	0.643564	0.541261	0.516567	0.352996	0.502565	0.848321	0.505097	0.423267	0.521465	0.480095	0.469751	0.454939	0.595232	0.495459	0.433837	0.426941	0.528909	0.566508	0.582301	0.612737	0.584451	0.41516	0.497472	0.389487	0.400669	0.525025	0.389768	0.361925	0.482067	0.424319	0.425971	0.459131	0.5489	0.368258	0.462929	0.445114
	7.66295	0.766201	0.441252	0.336303	0.436213	0.414997	0.353544	0.358711	0.455219	0.403799	0.558509	0.415132	0.389466	0.624513	0.54804	0.534259	0.354478	0.492062	0.883317	0.472926	0.426017	0.491276	0.455061	0.461583	0.450481	0.592134	0.478699	0.439903	0.40966	0.512809	0.553531	0.56267	0.612028	0.588026	0.380445	0.490533	0.384209	0.395092	0.487724	0.37828	0.368417	0.4828	0.420147	0.436295	0.448522	0.564413	0.375172	0.449263	0.423235
	7.69628	0.763731	0.451178	0.350859	0.469353	0.418326	0.335251	0.366864	0.447932	0.418232	0.559085	0.422455	0.402858	0.638429	0.543711	0.524586	0.354842	0.502989	0.83272	0.494596	0.426933	0.487569	0.478484	0.477844	0.443229	0.607622	0.468245	0.439154	0.41618	0.526927	0.54123	0.566994	0.614159	0.575042	0.39903	0.471427	0.385923	0.379766	0.493553	0.374294	0.35922	0.469394	0.410195	0.433904	0.460607	0.536528	0.377982	0.470207	0.426766
	7.72963	0.773533	0.428327	0.334342	0.471271	0.40717	0.327176	0.380316	0.437181	0.383989	0.555857	0.401637	0.394727	0.630548	0.54619	0.523645	0.338518	0.501892	0.85341	0.480308	0.450201	0.492364	0.462969	0.466365	0.435021	0.609235	0.47653	0.426309	0.432965	0.532349	0.535979	0.576473	0.593154	0.572992	0.400839	0.482662	0.390728	0.410811	0.509686	0.395955	0.368352	0.481312	0.416037	0.449606	0.459394	0.530957	0.37502	0.447738	0.443618
	7.76297	0.720921	0.421433	0.32973	0.454356	0.4099	0.327184	0.356954	0.436153	0.402333	0.552875	0.404166	0.41945	0.638848	0.539929	0.526197	0.345525	0.505768	0.837558	0.481581	0.435531	0.501317	0.47514	0.467535	0.436189	0.623331	0.474127	0.428371	0.43155	0.510438	0.556805	0.580208	0.624675	0.565585	0.390282	0.479294	0.381913	0.384514	0.490919	0.381224	0.358268	0.472948	0.416905	0.42434	0.470839	0.536888	0.372025	0.454358	0.443713
	7.7963	0.736914	0.418633	0.35449	0.449734	0.417341	0.343499	0.360795	0.447059	0.374725	0.516692	0.399512	0.413839	0.622312	0.521077	0.524509	0.355543	0.52907	0.836166	0.465479	0.422353	0.485181	0.454535	0.460306	0.416465	0.580333	0.467925	0.430417	0.418644	0.501912	0.543635	0.565708	0.595355	0.557433	0.377405	0.46152	0.388181	0.388614	0.480485	0.397894	0.364525	0.465274	0.408592	0.42396	0.437289	0.518616	0.363898	0.434374	0.422042
	7.82963	0.75957	0.435158	0.346837	0.457031	0.412186	0.337035	0.371077	0.429432	0.407344	0.56155	0.393226	0.401813	0.628783	0.528385	0.517653	0.342728	0.482355	0.819202	0.472652	0.427983	0.509066	0.449336	0.447266	0.43574	0.581207	0.478427	0.450268	0.400486	0.510458	0.545789	0.56917	0.606928	0.564652	0.384881	0.444908	0.367205	0.399217	0.48768	0.393224	0.380156	0.460833	0.401486	0.420326	0.471038	0.543061	0.365883	0.456098	0.443535
	7.86298	0.696622	0.425182	0.322733	0.444387	0.403217	0.333511	0.353608	0.427682	0.399906	0.551097	0.398145	0.387554	0.617087	0.532423	0.527027	0.339986	0.50157	0.788692	0.459092	0.440208	0.491714	0.45648	0.464983	0.415991	0.561298	0.454113	0.43796	0.418099	0.498425	0.53423	0.543709	0.59397	0.56934	0.404177	0.477852	0.367324	0.395086	0.471789	0.378977	0.357671	0.451488	0.388444	0.426765	0.477327	0.514544	0.380553	0.435579	0.431463
	7.89632	0.689045	0.435514	0.327454	0.427541	0.399696	0.337854	0.36963	0.409106	0.391289	0.569533	0.392641	0.406962	0.628384	0.519148	0.51168	0.346645	0.493083	0.861264	0.470574	0.433421	0.505312	0.459671	0.464256	0.442694	0.567317	0.474835	0.445898	0.40975	0.494401	0.528638	0.556813	0.608385	0.575244	0.384511	0.477142	0.372382	0.396064	0.49013	0.38052	0.371506	0.456975	0.403821	0.423954	0.472125	0.504463	0.38075	0.456066	0.417663
	7.92963	0.7385	0.436169	0.342866	0.452261	0.407707	0.35244	0.363513	0.428216	0.405802	0.553207	0.399382	0.383315	0.642973	0.518894	0.501725	0.35359	0.514618	0.866952	0.468447	0.421591	0.480841	0.46128	0.443783	0.424989	0.579734	0.46903	0.445641	0.422048	0.501123	0.552416	0.530971	0.606019	0.55509	0.392432	0.462469	0.370831	0.393295	0.480306	0.367929	0.373308	0.454701	0.400915	0.425744	0.451486	0.508641	0.349208	0.447498	0.43471
	7.96297	0.73403	0.438802	0.337664	0.432119	0.388683	0.345039	0.375074	0.439527	0.392278	0.569769	0.400264	0.372831	0.630454	0.533044	0.503799	0.353766	0.481567	0.79135	0.448547	0.440843	0.475373	0.47177	0.448048	0.438921	0.590025	0.472889	0.446338	0.405051	0.488652	0.531344	0.574551	0.613542	0.545895	0.379787	0.444195	0.367974	0.385683	0.491575	0.37528	0.357591	0.456744	0.404453	0.401468	0.45386	0.502443	0.368476	0.436629	0.424231
	7.99627	0.78236	0.44847	0.33981	0.421702	0.394824	0.351866	0.353953	0.437439	0.403556	0.537881	0.400706	0.39397	0.608854	0.524797	0.499	0.345499	0.478239	0.818372	0.457964	0.433937	0.482982	0.459875	0.448701	0.443139	0.590857	0.475059	0.453603	0.408271	0.490832	0.54642	0.544783	0.614903	0.533241	0.3851	0.478448	0.377572	0.378078	0.468544	0.385676	0.377673	0.458958	0.404154	0.432475	0.433418	0.49893	0.35154	0.43153	0.423979
	8.02965	0.782519	0.447535	0.336053	0.425031	0.386621	0.351094	0.368132	0.446589	0.389968	0.533875	0.410232	0.387405	0.613785	0.513373	0.500744	0.345031	0.489344	0.806989	0.446333	0.428254	0.475411	0.463479	0.456201	0.427876	0.585124	0.479449	0.442954	0.411886	0.509097	0.525534	0.579492	0.596023	0.557337	0.369736	0.453039	0.355705	0.393003	0.474351	0.394351	0.362362	0.460423	0.407322	0.42555	0.443675	0.544402	0.371276	0.448688	0.438854
	8.06297	0.780409	0.436784	0.332456	0.414733	0.385438	0.323519	0.351755	0.432317	0.384581	0.547904	0.405906	0.401712	0.615185	0.516809	0.491587	0.346425	0.474063	0.806391	0.45687	0.422574	0.490533	0.460452	0.438833	0.428378	0.575213	0.45205	0.44847	0.417481	0.510966	0.530908	0.557112	0.598773	0.542317	0.37303	0.458469	0.34481	0.381864	0.486276	0.376477	0.367299	0.462071	0.414088	0.417467	0.438778	0.513016	0.368823	0.432322	0.42954
	8.09632	0.818684	0.398789	0.34286	0.425013	0.38766	0.334996	0.370295	0.421279	0.39968	0.534495	0.412755	0.4138	0.592636	0.515359	0.503128	0.353385	0.463422	0.825246	0.46023	0.430496	0.527881	0.43558	0.444339	0.407709	0.570716	0.48283	0.436827	0.417775	0.488635	0.529686	0.543611	0.587753	0.541437	0.366344	0.460671	0.374589	0.386062	0.484265	0.397034	0.367439	0.465657	0.411914	0.410884	0.442594	0.491255	0.367824	0.441622	0.429786
	8.12963	0.798258	0.424937	0.335748	0.428794	0.392778	0.346607	0.359965	0.43424	0.384022	0.500963	0.387399	0.38594	0.62818	0.500526	0.502367	0.345578	0.476992	0.809163	0.456164	0.42472	0.468972	0.449048	0.44179	0.410096	0.546898	0.464156	0.421443	0.395983	0.47126	0.531979	0.543745	0.601228	0.532325	0.371691	0.455491	0.363688	0.394048	0.46173	0.370771	0.371384	0.46062	0.389339	0.404782	0.443536	0.4964	0.359887	0.430506	0.425446
	8.16295	0.803122	0.435413	0.337288	0.422456	0.372414	0.36522	0.366701	0.438633	0.382267	0.531402	0.405995	0.384658	0.614084	0.498906	0.492244	0.352878	0.459838	0.79117	0.452894	0.419923	0.473913	0.454405	0.44512	0.411072	0.572298	0.473041	0.423441	0.405875	0.489973	0.517273	0.535881	0.593588	0.529156	0.367911	0.447778	0.354279	0.374762	0.44517	0.368275	0.354106	0.443047	0.383094	0.408981	0.430854	0.515125	0.364919	0.42673	0.415837
	8.1963	0.84822	0.429484	0.336658	0.394986	0.380455	0.343765	0.37182	0.423655	0.364753	0.517797	0.406967	0.393844	0.608071	0.500542	0.480072	0.34714	0.478397	0.774997	0.426333	0.417275	0.495041	0.465337	0.432282	0.417077	0.517529	0.454184	0.430978	0.410766	0.481065	0.50851	0.539682	0.569914	0.544696	0.359595	0.44464	0.364444	0.364926	0.459583	0.39792	0.345689	0.443215	0.40118	0.420433	0.442771	0.495165	0.357596	0.423582	0.400402
	8.22957	0.869928	0.424194	0.358955	0.396651	0.391121	0.338933	0.363337	0.413739	0.390568	0.549037	0.3941	0.390413	0.606996	0.477126	0.471385	0.351805	0.463211	0.763881	0.450787	0.428469	0.4652	0.442351	0.429042	0.42547	0.548828	0.446878	0.443537	0.405294	0.486311	0.522563	0.530412	0.584367	0.519766	0.365128	0.450946	0.375996	0.386141	0.449165	0.35556	0.356816	0.454634	0.384403	0.417232	0.442614	0.495948	0.365436	0.419027	0.422721
	8.26292	0.976994	0.421799	0.339219	0.415579	0.378755	0.335451	0.352092	0.404437	0.379096	0.552876	0.387304	0.374862	0.58721	0.483428	0.489566	0.348199	0.485271	0.795419	0.438206	0.413111	0.482149	0.423833	0.426926	0.433466	0.529189	0.439937	0.419281	0.405133	0.47628	0.508584	0.531368	0.58258	0.534065	0.358418	0.451962	0.363093	0.374048	0.476686	0.384713	0.383737	0.448171	0.402681	0.416116	0.438177	0.505799	0.364995	0.425299	0.421233
	8.2963	0.986418	0.4243	0.330815	0.415487	0.375243	0.330597	0.35976	0.419328	0.384404	0.488775	0.386511	0.368686	0.598134	0.482526	0.474912	0.344032	0.474653	0.791371	0.442883	0.4248	0.461113	0.441833	0.45076	0.411204	0.544848	0.461122	0.450442	0.401269	0.465299	0.502571	0.534325	0.598483	0.506745	0.357627	0.442993	0.360456	0.390087	0.45842	0.376874	0.355039	0.427319	0.387178	0.409322	0.430393	0.492277	0.369806	0.432577	0.395807
	8.32963	0.929111	0.426115	0.340647	0.396846	0.377416	0.329312	0.364878	0.416885	0.380503	0.495721	0.387932	0.377793	0.596723	0.486623	0.474455	0.333713	0.479238	0.770363	0.417975	0.41293	0.459302	0.454202	0.438695	0.419791	0.537611	0.448545	0.419876	0.39398	0.481954	0.504195	0.528222	0.588481	0.520279	0.368153	0.429028	0.359159	0.370626	0.452322	0.374063	0.358337	0.434934	0.389786	0.401802	0.428725	0.502253	0.357225	0.418524	0.405549
	8.36293	0.909998	0.422458	0.349321	0.408023	0.369179	0.329959	0.353308	0.418638	0.405121	0.524865	0.379885	0.388182	0.609467	0.492428	0.470382	0.342031	0.456227	0.775505	0.420834	0.421606	0.440662	0.454625	0.421078	0.406385	0.526932	0.43465	0.444448	0.402375	0.489845	0.505244	0.517361	0.584666	0.510812	0.340041	0.42897	0.364497	0.379266	0.456004	0.367184	0.365969	0.425999	0.399899	0.396104	0.427686	0.491499	0.371286	0.425644	0.423671
	8.39623	0.892503	0.416768	0.331456	0.397719	0.368929	0.311133	0.351618	0.408825	0.380501	0.505504	0.379045	0.369554	0.593819	0.483724	0.489698	0.356814	0.479976	0.762431	0.439435	0.410505	0.45491	0.416729	0.442797	0.418923	0.535806	0.439933	0.427413	0.415956	0.463584	0.486045	0.503494	0.586791	0.514978	0.367427	0.432726	0.368989	0.369091	0.44685	0.37724	0.378636	0.441642	0.371962	0.395674	0.417695	0.488922	0.35607	0.428551	0.4058
	8.42957	0.901567	0.425374	0.344139	0.424693	0.372229	0.324692	0.36817	0.411707	0.38752	0.517518	0.376413	0.383079	0.591304	0.473523	0.485523	0.339069	0.475475	0.773546	0.409319	0.423266	0.4728	0.440701	0.428609	0.416028	0.538974	0.443782	0.428559	0.405756	0.464259	0.497237	0.512184	0.602821	0.509403	0.365569	0.438206	0.363143	0.375236	0.470015	0.386482	0.352266	0.441304	0.390761	0.402472	0.425634	0.482256	0.357845	0.411494	0.407745
	8.46293	0.91806	0.41097	0.319775	0.402413	0.371815	0.333991	0.356176	0.403992	0.39727	0.487161	0.382821	0.384026	0.569978	0.472359	0.490284	0.34553	0.455678	0.747345	0.391038	0.401761	0.460524	0.430655	0.423391	0.417422	0.522195	0.436691	0.434061	0.413434	0.463152	0.477158	0.503391	0.587607	0.502945	0.359702	0.425296	0.367664	0.370128	0.435946	0.373849	0.328509	0.428953	0.387642	0.405371	0.420989	0.477415	0.371079	0.417002	0.397516
	8.49627	0.864706	0.419855	0.340185	0.392381	0.388948	0.330986	0.36622	0.413727	0.382369	0.502946	0.372223	0.392701	0.56764	0.46723	0.477669	0.335489	0.432943	0.773496	0.397191	0.424568	0.456297	0.420254	0.431101	0.396348	0.540655	0.439147	0.416739	0.39882	0.458658	0.486133	0.51115	0.584076	0.49847	0.362822	0.431866	0.361633	0.373583	0.461189	0.381375	0.367898	0.432515	0.373116	0.397958	0.40363	0.483108	0.367929	0.426386	0.399683
	8.5296	0.808213	0.416349	0.330904	0.400305	0.394339	0.334848	0.35593	0.408401	0.380108	0.489943	0.383678	0.358122	0.553808	0.464577	0.466443	0.350537	0.445329	0.745039	0.408479	0.421074	0.437558	0.433031	0.409904	0.394805	0.513375	0.453097	0.43301	0.396389	0.474015	0.483928	0.501429	0.538573	0.490588	0.351607	0.441607	0.35713	0.386043	0.45401	0.382498	0.353582	0.440303	0.366844	0.408959	0.395185	0.45247	0.350409	0.402627	0.401972
	8.56297	0.780416	0.414621	0.344287	0.403757	0.355748	0.363396	0.355602	0.404801	0.393919	0.521652	0.386405	0.377018	0.573007	0.469877	0.463864	0.353461	0.469496	0.753361	0.414671	0.409944	0.436007	0.442456	0.422383	0.422122	0.515946	0.447471	0.437787	0.398849	0.46056	0.481671	0.517381	0.576267	0.497966	0.359593	0.421564	0.359286	0.368893	0.460127	0.354086	0.361932	0.439677	0.38085	0.397263	0.43076	0.472366	0.367401	0.405425	0.397883
	8.5963	0.817046	0.438749	0.322342	0.403263	0.358599	0.333338	0.369741	0.400107	0.394474	0.486831	0.381242	0.360613	0.561208	0.474437	0.470743	0.337664	0.449165	0.71925	0.405396	0.421676	0.471243	0.44517	0.407849	0.387929	0.500896	0.456608	0.421408	0.395925	0.451347	0.44858	0.496077	0.585809	0.489347	0.366807	0.425355	0.361584	0.372924	0.456533	0.378388	0.372304	0.439784	0.390533	0.398597	0.409428	0.467163	0.366026	0.425359	0.379068
	8.62962	0.8668	0.449052	0.345296	0.398368	0.359543	0.345316	0.347877	0.420731	0.370076	0.492994	0.380765	0.367134	0.577305	0.467442	0.463679	0.354753	0.468375	0.713551	0.402538	0.428119	0.451043	0.422114	0.415909	0.419468	0.531455	0.464334	0.446916	0.408479	0.450094	0.475062	0.498661	0.575194	0.501123	0.360716	0.412309	0.352517	0.367596	0.447726	0.375206	0.375253	0.429281	0.383964	0.405366	0.413722	0.474639	0.363323	0.412404	0.397297
	8.66297	0.798627	0.413117	0.337121	0.389269	0.36108	0.351354	0.357539	0.393042	0.36494	0.51859	0.38341	0.371468	0.573098	0.461893	0.462562	0.341023	0.443145	0.727936	0.410138	0.411957	0.445758	0.434557	0.399879	0.408707	0.506637	0.446914	0.426248	0.397115	0.449199	0.47244	0.498363	0.560241	0.487413	0.355484	0.411136	0.341804	0.376628	0.459297	0.363577	0.36929	0.426749	0.407903	0.393326	0.417877	0.471877	0.363701	0.410068	0.385517
	8.6963	0.743064	0.418984	0.338051	0.399342	0.366223	0.346538	0.35737	0.404643	0.364637	0.486557	0.37456	0.368951	0.564617	0.460665	0.462137	0.339515	0.451967	0.697759	0.407897	0.411657	0.443311	0.429722	0.408105	0.400296	0.518118	0.44182	0.439503	0.411744	0.448808	0.473714	0.492778	0.592769	0.483045	0.35974	0.425626	0.360019	0.363214	0.445949	0.378617	0.373403	0.435796	0.366594	0.391905	0.425718	0.476392	0.36955	0.419181	0.402344
	8.72963	0.781752	0.397618	0.333791	0.389073	0.335886	0.326346	0.35917	0.40134	0.36142	0.480294	0.373115	0.361263	0.57524	0.459627	0.45428	0.363696	0.451018	0.758073	0.398673	0.403893	0.447045	0.426501	0.40721	0.39374	0.499046	0.42486	0.424157	0.396624	0.454821	0.456272	0.487369	0.553928	0.467617	0.34336	0.415198	0.352066	0.369796	0.446667	0.370992	0.364861	0.428526	0.389135	0.39284	0.41829	0.433137	0.356599	0.398964	0.399106
	8.76298	0.836109	0.407763	0.345615	0.389807	0.353377	0.343859	0.35849	0.394622	0.372471	0.474807	0.372959	0.362347	0.546064	0.463652	0.451249	0.346007	0.445275	0.754906	0.399888	0.420559	0.441342	0.42629	0.403853	0.404175	0.497063	0.433412	0.426226	0.397162	0.433961	0.454717	0.4645	0.567116	0.480956	0.342726	0.407641	0.351896	0.361381	0.448614	0.385219	0.348567	0.425256	0.379441	0.393395	0.411126	0.451955	0.335958	0.412871	0.394614
	8.79628	0.798887	0.414751	0.34453	0.393079	0.372851	0.319931	0.363563	0.392669	0.388362	0.496115	0.380758	0.367487	0.570061	0.457085	0.443795	0.352682	0.438639	0.70415	0.413521	0.417927	0.445788	0.436115	0.417171	0.418985	0.516168	0.422027	0.417076	0.406245	0.444712	0.455457	0.480566	0.564604	0.495685	0.349237	0.419926	0.353004	0.369053	0.43309	0.387119	0.367149	0.426516	0.395204	0.385333	0.39698	0.475224	0.365528	0.406256	0.392365
	8.82963	0.802108	0.416976	0.329227	0.39533	0.366463	0.337553	0.354887	0.403879	0.390148	0.453318	0.37072	0.3813	0.565006	0.457634	0.448632	0.347276	0.421225	0.707443	0.405171	0.414256	0.423284	0.397354	0.408474	0.387011	0.497013	0.450198	0.433389	0.389967	0.439414	0.447328	0.488157	0.568949	0.494295	0.343307	0.424392	0.365195	0.363574	0.447639	0.383585	0.374872	0.424822	0.384248	0.384453	0.394039	0.460299	0.366011	0.412845	0.377936
	8.86297	0.784101	0.425688	0.342668	0.393358	0.341313	0.34553	0.354653	0.374923	0.370137	0.506491	0.37439	0.365244	0.564634	0.44414	0.440798	0.360861	0.43757	0.74	0.394755	0.406607	0.420694	0.413828	0.402999	0.397567	0.501549	0.431056	0.416519	0.403571	0.439257	0.447474	0.471919	0.555887	0.483037	0.352011	0.414249	0.346124	0.36203	0.445892	0.401928	0.354517	0.42799	0.366983	0.391169	0.403559	0.459458	0.363371	0.407992	0.401354
	8.89628	0.785821	0.416683	0.342571	0.4086	0.362585	0.336873	0.362871	0.380811	0.37691	0.505159	0.371788	0.367652	0.583003	0.447273	0.4447	0.368654	0.42149	0.69308	0.381964	0.428343	0.416312	0.433521	0.402505	0.389603	0.505411	0.437059	0.425879	0.40832	0.445158	0.44601	0.487239	0.562581	0.477252	0.355768	0.399227	0.346679	0.372351	0.444155	0.361457	0.360782	0.422583	0.352945	0.391494	0.419644	0.43999	0.363497	0.397614	0.401189
	8.9297	0.84223	0.42533	0.345834	0.389812	0.354333	0.334476	0.35452	0.38723	0.365546	0.471106	0.382835	0.362511	0.548033	0.459138	0.452806	0.351389	0.442619	0.697461	0.394265	0.412726	0.432547	0.402432	0.408808	0.404382	0.475112	0.432723	0.417997	0.404423	0.433071	0.454035	0.473537	0.554647	0.475536	0.361214	0.40039	0.355893	0.369182	0.459663	0.370394	0.359871	0.420556	0.382927	0.388513	0.393071	0.461628	0.368494	0.418965	0.38127
	8.96293	0.737796	0.390568	0.346968	0.392294	0.349113	0.342314	0.358503	0.380888	0.379613	0.465136	0.377775	0.370569	0.567133	0.445819	0.43863	0.349888	0.447929	0.701711	0.394484	0.412515	0.421563	0.424618	0.401809	0.396112	0.486625	0.414761	0.426254	0.400933	0.452041	0.453349	0.469708	0.571995	0.473797	0.343355	0.40973	0.369707	0.374106	0.444594	0.384343	0.367942	0.413247	0.37187	0.399397	0.402804	0.447033	0.341086	0.401643	0.396768
	8.99628	0.763017	0.404673	0.34232	0.388967	0.356333	0.308416	0.358705	0.381762	0.363023	0.480883	0.375205	0.369861	0.552573	0.445361	0.429035	0.363848	0.430699	0.713843	0.39133	0.409205	0.430663	0.420538	0.401115	0.402545	0.486456	0.422089	0.431285	0.393324	0.446739	0.426182	0.440573	0.564815	0.491349	0.37457	0.414393	0.349663	0.370874	0.438186	0.361791	0.365984	0.436081	0.355484	0.388652	0.394397	0.464593	0.372737	0.41228	0.377136
	9.02962	0.765393	0.41361	0.345043	0.38549	0.348909	0.325721	0.359704	0.385137	0.377227	0.475534	0.380681	0.371735	0.543564	0.436559	0.433305	0.345181	0.416292	0.708664	0.376666	0.41217	0.444088	0.41757	0.380087	0.387793	0.475238	0.428564	0.434697	0.396996	0.438026	0.424363	0.470277	0.526412	0.475224	0.348429	0.405256	0.350102	0.358795	0.421766	0.348165	0.371554	0.442817	0.380555	0.382784	0.404638	0.426718	0.350602	0.394405	0.396839
	9.06297	0.720418	0.404537	0.347195	0.376193	0.338884	0.344067	0.354551	0.374607	0.368128	0.468034	0.382201	0.361806	0.537749	0.443485	0.430025	0.347009	0.421903	0.698897	0.388877	0.406212	0.415527	0.404161	0.399537	0.383141	0.473938	0.426	0.423458	0.409437	0.430057	0.433629	0.46511	0.536138	0.463938	0.329645	0.406203	0.343835	0.364649	0.427969	0.383373	0.357881	0.415472	0.362023	0.39339	0.407734	0.451242	0.372345	0.412507	0.388304
	9.09628	0.720734	0.395928	0.339971	0.385825	0.3454	0.328978	0.363786	0.390261	0.36868	0.465896	0.37334	0.371466	0.534158	0.447878	0.439742	0.341238	0.444281	0.691573	0.396145	0.422477	0.432533	0.390099	0.393522	0.39427	0.493551	0.425906	0.436824	0.393853	0.438224	0.453401	0.463625	0.547578	0.4533	0.347896	0.405623	0.343185	0.370458	0.425236	0.376222	0.367513	0.406829	0.385228	0.373142	0.404137	0.458879	0.345379	0.419697	0.38379
	9.12963	0.691684	0.419226	0.354278	0.382435	0.355771	0.340874	0.344804	0.371196	0.369081	0.482987	0.391923	0.356621	0.545902	0.431902	0.436655	0.34511	0.416344	0.700988	0.405076	0.411155	0.404728	0.413503	0.398265	0.385377	0.492812	0.412452	0.419898	0.403446	0.429003	0.426738	0.461558	0.51908	0.456685	0.342441	0.401318	0.341689	0.353967	0.416783	0.376955	0.384025	0.417265	0.368823	0.381219	0.389142	0.429047	0.353817	0.391711	0.393825
	9.16292	0.683781	0.40536	0.355456	0.384944	0.344247	0.337503	0.361352	0.378369	0.352682	0.463991	0.372613	0.358053	0.554293	0.414361	0.42116	0.353299	0.429364	0.717815	0.385484	0.418827	0.411549	0.413579	0.39707	0.380381	0.488218	0.411335	0.431448	0.40369	0.427661	0.41355	0.461651	0.552238	0.456839	0.345237	0.413889	0.351055	0.361833	0.416728	0.364569	0.352293	0.404275	0.390251	0.381021	0.395294	0.456671	0.331279	0.402078	0.393487
	9.19628	0.668855	0.416223	0.331452	0.385644	0.334785	0.333895	0.358295	0.382668	0.36181	0.47436	0.374875	0.35314	0.544828	0.428172	0.428913	0.358314	0.432454	0.676258	0.36752	0.400635	0.412776	0.392547	0.400758	0.376907	0.464304	0.408855	0.420976	0.396118	0.450691	0.413933	0.457069	0.531001	0.450596	0.338262	0.40638	0.342388	0.357347	0.412266	0.353241	0.367612	0.40989	0.363295	0.389421	0.387172	0.472146	0.371012	0.419049	0.382497
	9.22965	0.671608	0.40513	0.333884	0.374268	0.343849	0.335325	0.359322	0.385147	0.345771	0.455192	0.374697	0.365022	0.547685	0.441266	0.427992	0.345648	0.427937	0.657723	0.383174	0.420123	0.425259	0.397395	0.405227	0.370892	0.464604	0.417756	0.424961	0.389274	0.43682	0.428011	0.456504	0.53538	0.455977	0.348705	0.408461	0.351794	0.349574	0.420875	0.351651	0.355438	0.414478	0.375231	0.368405	0.391925	0.438492	0.352215	0.393646	0.368019
	9.26298	0.607417	0.402965	0.329743	0.36029	0.343187	0.337356	0.355512	0.367612	0.346918	0.454085	0.371406	0.376012	0.547764	0.416873	0.429709	0.355207	0.413341	0.661462	0.365928	0.387447	0.423214	0.389575	0.388112	0.382403	0.500409	0.398653	0.425155	0.390026	0.424738	0.415068	0.465175	0.530271	0.45832	0.348511	0.402949	0.351541	0.353264	0.412872	0.384322	0.359497	0.410417	0.368656	0.373863	0.38415	0.430518	0.350688	0.393712	0.373377
	9.2963	0.588484	0.403623	0.353456	0.380949	0.328616	0.336549	0.358409	0.370241	0.363068	0.466526	0.393221	0.356594	0.532631	0.407004	0.430677	0.345103	0.411633	0.670416	0.385568	0.399024	0.42838	0.395324	0.407742	0.385024	0.463199	0.40322	0.43681	0.388955	0.424483	0.410119	0.440542	0.544184	0.446281	0.335169	0.381768	0.356995	0.351728	0.430125	0.367885	0.370483	0.4113	0.374281	0.386452	0.40163	0.440567	0.350104	0.393219	0.376816
	9.32965	0.632168	0.37942	0.353932	0.374145	0.345025	0.329228	0.356944	0.393696	0.371204	0.449515	0.390703	0.374835	0.554373	0.429501	0.417898	0.342531	0.415927	0.633532	0.374984	0.418416	0.421753	0.391393	0.398286	0.389165	0.479939	0.396958	0.421109	0.397868	0.438236	0.396862	0.435099	0.536576	0.452224	0.333405	0.379646	0.34916	0.358368	0.423238	0.367039	0.374191	0.41617	0.382817	0.374287	0.403619	0.426959	0.34842	0.392756	0.386388
	9.36295	0.596368	0.375946	0.351453	0.382136	0.354919	0.313643	0.359215	0.359849	0.360622	0.455356	0.380868	0.362631	0.570277	0.42832	0.441374	0.350709	0.429159	0.663431	0.379847	0.410803	0.432185	0.415033	0.392714	0.398605	0.466976	0.419399	0.419439	0.401025	0.430936	0.421251	0.458371	0.555768	0.447175	0.33635	0.399426	0.345413	0.359734	0.413291	0.374671	0.3767	0.42	0.363599	0.391537	0.400139	0.434999	0.363782	0.405089	0.392861
	9.39628	0.576979	0.404727	0.32145	0.378279	0.339307	0.334473	0.355561	0.371005	0.337116	0.460522	0.385767	0.369244	0.529995	0.431267	0.424085	0.363195	0.431579	0.63882	0.378547	0.420823	0.420192	0.406147	0.389634	0.38699	0.495178	0.425014	0.427437	0.396639	0.424615	0.425852	0.456066	0.525275	0.45103	0.331083	0.408943	0.355097	0.371321	0.420469	0.354041	0.353803	0.409088	0.360872	0.38066	0.398799	0.446434	0.345262	0.403907	0.383636
	9.42963	0.580333	0.39866	0.358151	0.374685	0.340633	0.321032	0.357032	0.389825	0.360361	0.466452	0.365416	0.35221	0.520712	0.432516	0.423884	0.353931	0.426153	0.681288	0.371753	0.413863	0.409477	0.383762	0.401151	0.37555	0.465733	0.419857	0.427219	0.398192	0.420452	0.410058	0.433069	0.531307	0.461385	0.334496	0.396853	0.360878	0.353035	0.408074	0.377361	0.353497	0.401739	0.353696	0.383908	0.388917	0.43104	0.364448	0.406534	0.389484
	9.46297	0.56173	0.400934	0.332061	0.393554	0.332375	0.335074	0.347927	0.388028	0.345453	0.454495	0.366166	0.380299	0.529572	0.439735	0.422127	0.359575	0.411	0.646031	0.365443	0.412864	0.392009	0.39053	0.380637	0.384093	0.45305	0.404198	0.417093	0.392139	0.419699	0.399808	0.443998	0.513109	0.455729	0.339517	0.383903	0.341653	0.357245	0.405042	0.365236	0.349781	0.41562	0.36404	0.37085	0.39183	0.438254	0.360399	0.385707	0.383216
	9.49632	0.541897	0.385283	0.338313	0.383916	0.339925	0.31365	0.355576	0.381791	0.351884	0.440807	0.368555	0.335767	0.539013	0.411387	0.424426	0.347732	0.422001	0.627975	0.36686	0.406288	0.392166	0.38666	0.383704	0.385258	0.465416	0.399197	0.415883	0.405947	0.422291	0.382263	0.450952	0.512472	0.444819	0.328549	0.403294	0.33873	0.346752	0.402365	0.369584	0.367825	0.397962	0.343906	0.362532	0.396938	0.413163	0.347927	0.386821	0.374041
	9.52965	0.571141	0.394907	0.346849	0.393136	0.350752	0.345446	0.355111	0.372071	0.366977	0.457018	0.371487	0.35836	0.543074	0.417158	0.40846	0.374342	0.416248	0.634547	0.365597	0.409684	0.396671	0.393985	0.384856	0.393146	0.45457	0.394869	0.430117	0.399638	0.420008	0.398623	0.44506	0.509706	0.436884	0.329663	0.392943	0.35234	0.359514	0.411181	0.379209	0.360311	0.406528	0.362944	0.382911	0.368879	0.428723	0.3611	0.391978	0.379495
	9.56297	0.552747	0.408744	0.334724	0.373423	0.338618	0.32531	0.351229	0.37891	0.336109	0.441348	0.364803	0.337689	0.511404	0.407785	0.416151	0.351792	0.43392	0.633899	0.353591	0.421699	0.400807	0.408612	0.370968	0.370491	0.469535	0.404951	0.422077	0.387852	0.413379	0.409461	0.434263	0.524551	0.439953	0.342207	0.394235	0.351932	0.343811	0.393975	0.367903	0.380567	0.41897	0.365435	0.385322	0.380157	0.423542	0.354261	0.380233	0.374401
	9.59628	0.524974	0.417646	0.342184	0.383766	0.336566	0.356197	0.350197	0.37471	0.374016	0.449201	0.367332	0.367168	0.528848	0.417171	0.433014	0.363352	0.381381	0.665941	0.365961	0.410396	0.411886	0.39243	0.395207	0.384436	0.476886	0.387169	0.430074	0.404087	0.414654	0.407772	0.445433	0.510838	0.450268	0.354915	0.384391	0.345088	0.352126	0.40901	0.370694	0.384881	0.391416	0.37872	0.368046	0.390784	0.418101	0.342031	0.3795	0.367418
	9.62963	0.545073	0.40404	0.341007	0.374568	0.33363	0.343523	0.35799	0.362963	0.348891	0.451181	0.374975	0.353095	0.511609	0.416568	0.408609	0.345457	0.417353	0.635029	0.37026	0.408781	0.407803	0.399189	0.38855	0.377758	0.452719	0.415362	0.426416	0.392359	0.399422	0.397948	0.429357	0.504621	0.446097	0.340917	0.383328	0.339369	0.344543	0.398514	0.363394	0.360647	0.407986	0.363577	0.363354	0.394099	0.409908	0.346412	0.372136	0.362662
	9.66297	0.519722	0.417409	0.336533	0.365713	0.339898	0.32989	0.352086	0.373662	0.365077	0.458919	0.369685	0.358646	0.5146	0.426254	0.422325	0.338653	0.405859	0.608158	0.383127	0.420384	0.40346	0.396781	0.382298	0.378767	0.439685	0.404782	0.425548	0.398895	0.397254	0.398115	0.448341	0.513904	0.445254	0.341176	0.375759	0.365724	0.347426	0.3943	0.381187	0.376455	0.416969	0.333004	0.372032	0.358611	0.424301	0.353066	0.399996	0.380395
	9.69627	0.548526	0.403195	0.344832	0.379293	0.351943	0.325377	0.371224	0.386454	0.345787	0.44884	0.374073	0.346141	0.508576	0.408811	0.411075	0.354932	0.429215	0.607104	0.385286	0.410786	0.407755	0.38212	0.372764	0.37544	0.437667	0.402707	0.417921	0.372433	0.419584	0.390896	0.449342	0.5198	0.444481	0.339663	0.37825	0.352967	0.356903	0.403501	0.357212	0.354075	0.408479	0.349642	0.375258	0.387058	0.436835	0.349082	0.383153	0.383917
	9.72963	0.51314	0.39798	0.338358	0.36002	0.351853	0.335474	0.349505	0.402541	0.353413	0.46448	0.3733	0.338529	0.507874	0.406076	0.412289	0.347261	0.408091	0.614681	0.343258	0.405344	0.414053	0.382203	0.386834	0.367981	0.453114	0.38964	0.43052	0.38439	0.398889	0.388105	0.425762	0.492967	0.441438	0.32379	0.385315	0.351453	0.361865	0.400216	0.383239	0.368943	0.400844	0.3561	0.367535	0.394209	0.413036	0.369021	0.40371	0.376506
	9.76297	0.509158	0.393011	0.336624	0.390817	0.341918	0.35829	0.348091	0.373795	0.35797	0.452073	0.387309	0.358983	0.518923	0.424317	0.405621	0.353539	0.400126	0.62805	0.349649	0.415236	0.40213	0.394534	0.381093	0.379036	0.44437	0.404598	0.427911	0.386445	0.406384	0.403529	0.433821	0.495346	0.441854	0.329699	0.373607	0.350028	0.356667	0.388035	0.357271	0.367797	0.398689	0.347397	0.376388	0.364936	0.421134	0.344568	0.378812	0.36199
	9.79628	0.526444	0.376838	0.350487	0.368352	0.342467	0.330199	0.33982	0.367618	0.344002	0.456227	0.355496	0.362215	0.511301	0.413269	0.40371	0.333866	0.414969	0.611544	0.333261	0.406198	0.380567	0.38199	0.378483	0.367684	0.429098	0.378251	0.41731	0.379318	0.402807	0.376272	0.420939	0.51623	0.43625	0.326785	0.382274	0.347347	0.356495	0.399403	0.381055	0.350859	0.398187	0.367969	0.375966	0.367909	0.404536	0.356114	0.366943	0.366877
	9.82963	0.499683	0.402551	0.343853	0.359099	0.35139	0.351833	0.354491	0.372959	0.355716	0.435941	0.368555	0.36327	0.517167	0.427777	0.417159	0.353638	0.421344	0.601286	0.36121	0.414916	0.391589	0.382761	0.381915	0.379374	0.461865	0.400303	0.411884	0.391922	0.399687	0.387538	0.432968	0.504543	0.448487	0.340216	0.380707	0.358887	0.31244	0.402204	0.366229	0.374498	0.394903	0.350207	0.387574	0.384996	0.429631	0.368418	0.392041	0.363378
	9.86297	0.509635	0.39826	0.356534	0.37758	0.357451	0.335076	0.35796	0.358782	0.376703	0.456526	0.377541	0.356706	0.502214	0.421513	0.412514	0.344936	0.438438	0.6179	0.364482	0.427922	0.417159	0.381528	0.379567	0.383604	0.468212	0.40556	0.410085	0.394562	0.414677	0.38801	0.443288	0.519678	0.447365	0.349975	0.397102	0.35384	0.354412	0.417461	0.355635	0.366351	0.405284	0.355602	0.374086	0.399663	0.40231	0.355308	0.386563	0.376312
	9.89628	0.485127	0.394807	0.355415	0.382775	0.354021	0.350292	0.347987	0.378174	0.341448	0.452844	0.380655	0.354386	0.498337	0.411851	0.413893	0.354547	0.4036	0.592293	0.342908	0.408111	0.40133	0.399595	0.389438	0.385854	0.447302	0.41069	0.410501	0.397996	0.406718	0.388073	0.452042	0.507731	0.443211	0.340289	0.379425	0.362723	0.361038	0.413029	0.39298	0.371695	0.421568	0.367134	0.385452	0.396125	0.42227	0.361668	0.381064	0.372704
	9.92965	0.487149	0.417983	0.372179	0.381881	0.358308	0.364661	0.374799	0.362192	0.325967	0.449776	0.378454	0.355979	0.505117	0.409506	0.402672	0.358287	0.408158	0.644533	0.360455	0.405465	0.418162	0.381103	0.369988	0.386312	0.469419	0.423367	0.435533	0.384657	0.426567	0.380604	0.418948	0.505911	0.453304	0.34635	0.394988	0.363405	0.357413	0.402164	0.37836	0.394038	0.418233	0.36951	0.364606	0.379371	0.415641	0.381049	0.390956	0.381309
	9.96298	0.515591	0.412177	0.370446	0.391099	0.368822	0.390152	0.367825	0.373328	0.392631	0.44381	0.391392	0.390704	0.536265	0.411069	0.436065	0.398185	0.43413	0.661723	0.389866	0.447345	0.425116	0.420997	0.395857	0.387642	0.475146	0.437904	0.452219	0.440881	0.424827	0.422279	0.480534	0.540678	0.469289	0.364037	0.426146	0.395249	0.369068	0.441779	0.416454	0.402079	0.447585	0.376276	0.411347	0.410366	0.447579	0.372339	0.431778	0.374513
	9.99628	0.591023	0.503114	0.477566	0.432825	0.472097	0.489637	0.423774	0.452628	0.504771	0.523934	0.462743	0.485596	0.603231	0.501123	0.531234	0.434092	0.532356	0.821932	0.499022	0.564634	0.559197	0.51382	0.477409	0.440078	0.52516	0.498284	0.57018	0.572378	0.549507	0.47491	0.629531	0.622617	0.567171	0.437774	0.528954	0.490438	0.440083	0.533978	0.528609	0.482835	0.586686	0.455072	0.518182	0.490543	0.501153	0.438944	0.581343	0.450274
	10.0297	0.718659	0.58478	0.624471	0.525887	0.530786	0.611283	0.509604	0.551579	0.650285	0.558783	0.569376	0.598901	0.759133	0.54266	0.646218	0.514035	0.669585	1.02961	0.599536	0.686036	0.779359	0.718377	0.552862	0.514182	0.644248	0.5856	0.718726	0.698223	0.680626	0.559215	0.765573	0.685332	0.651559	0.56895	0.6674	0.609254	0.529071	0.649866	0.656607	0.633746	0.672606	0.522422	0.671634	0.573577	0.582232	0.503983	0.718135	0.546456
	10.063	0.786337	0.745261	0.746477	0.610315	0.63201	0.727171	0.593665	0.628653	0.826753	0.589505	0.675906	0.751275	0.908977	0.606558	0.762052	0.610696	0.764993	1.32311	0.723215	0.834435	0.946427	0.879872	0.67297	0.586057	0.717154	0.692486	0.866098	0.881292	0.825027	0.69331	0.882269	0.762349	0.80315	0.652767	0.775865	0.739889	0.655789	0.764121	0.814997	0.736989	0.83406	0.621186	0.831855	0.681809	0.670625	0.574351	0.869571	0.618678
	10.0963	0.872016	0.855276	0.831852	0.720628	0.736672	0.899579	0.645157	0.692264	0.921965	0.644121	0.765137	0.867454	1.01138	0.671457	0.823728	0.678309	0.866191	1.55266	0.910945	0.973694	1.24027	1.02277	0.773464	0.633658	0.807444	0.722638	0.978769	0.981835	0.904671	0.708382	1.01738	0.824554	0.849456	0.713616	0.990436	0.859432	0.763262	0.903354	0.926147	0.805539	1.03572	0.707653	0.942841	0.776273	0.76818	0.649611	1.0771	0.673698
	10.1296	0.978548	0.979106	0.972629	0.835609	0.83842	0.936377	0.785897	0.816434	1.08177	0.723213	0.859591	1.02807	1.24516	0.750202	0.940529	0.762471	0.963725	1.70293	1.24204	1.09636	1.37108	1.1155	0.880311	0.66852	0.934891	0.791961	1.20048	1.14745	1.04462	0.814763	1.14933	0.878037	0.957319	0.852688	1.1402	1.00731	0.872461	1.05624	1.15336	0.909222	1.24058	0.823553	1.10118	0.855606	0.851142	0.714788	1.31399	0.733189
	10.163	1.10434	1.06705	1.10009	0.89194	1.00602	1.12549	0.838247	0.868168	1.21109	0.758627	0.932732	1.08165	1.3939	0.784614	0.986984	0.8226	0.981459	1.78835	1.37553	1.21326	1.33933	1.17365	0.960306	0.731829	1.05305	0.880709	1.26852	1.26272	1.1545	0.913042	1.25684	0.921332	1.00688	0.928352	1.23811	1.14594	1.01391	1.21349	1.29792	1.05435	1.28679	0.941272	1.21486	0.918364	0.928017	0.810816	1.56953	0.759934
	10.1963	1.11305	1.13027	1.23123	0.952581	1.21663	1.11118	0.903871	0.94394	1.32045	0.768888	1.04916	1.19294	1.58863	0.84639	1.02898	0.905507	1.05348	2.10599	1.72715	1.33338	1.44646	1.2295	1.04996	0.74951	1.13084	0.903641	1.37461	1.32021	1.20941	0.969697	1.25948	0.957943	1.09725	0.990145	1.36556	1.21706	1.05234	1.34239	1.27753	1.02577	1.46053	1.01156	1.33857	0.950465	1.02177	0.872948	1.69834	0.812547
	10.2296	1.25903	1.26814	1.24466	1.01521	1.42684	1.14093	0.966216	1.03788	1.38796	0.823266	1.16059	1.279	1.79231	0.916444	1.08042	0.988327	1.19009	2.16454	1.89182	1.40475	1.59623	1.36171	1.07845	0.859853	1.19902	0.97925	1.44505	1.48498	1.30912	1.02691	1.44994	1.05765	1.20215	1.1257	1.4274	1.40971	1.25903	1.43579	1.44642	1.17299	1.52678	1.06092	1.50159	1.06331	1.22162	0.966841	1.96015	0.933545
	10.263	1.2506	1.34429	1.32815	1.12192	1.5416	1.36772	1.07922	1.07293	1.5407	0.83583	1.26512	1.46018	1.97411	0.965058	1.20566	1.0011	1.30018	2.40595	2.06991	1.51509	1.62536	1.45583	1.11488	0.846832	1.20401	0.994117	1.54578	1.54577	1.4693	1.11092	1.48851	1.09849	1.23189	1.16337	1.65755	1.39154	1.40863	1.64314	1.56959	1.25153	1.59161	1.1592	1.54702	1.13503	1.36604	1.01977	2.13867	1.02538
	10.2963	1.31683	1.38644	1.43722	1.20147	1.73278	1.43714	1.17153	1.13967	1.73536	0.912212	1.37668	1.49502	2.00506	0.995572	1.26044	1.05158	1.24593	2.45764	2.07243	1.59661	1.73643	1.43854	1.23425	0.892948	1.32737	1.07928	1.59653	1.56749	1.52405	1.11794	1.56282	1.17918	1.24582	1.27021	1.70366	1.58551	1.59767	1.78674	1.67529	1.25721	1.63856	1.20272	1.70794	1.2165	1.43435	1.13444	2.26254	1.05195
	10.3296	1.39307	1.59389	1.56967	1.21185	1.97987	1.42091	1.18366	1.21756	1.83375	0.913521	1.55769	1.58678	2.12297	1.02025	1.3049	1.20809	1.40249	2.33431	2.23178	1.72026	1.78899	1.56781	1.29401	0.957524	1.37916	1.07928	1.68362	1.68607	1.55346	1.18018	1.61723	1.1673	1.30081	1.27698	1.76358	1.57627	1.68499	1.81516	1.7243	1.32649	1.75276	1.30465	1.74926	1.23956	1.68371	1.12242	2.46896	1.1536
	10.363	1.43884	1.54753	1.59962	1.31717	1.91391	1.51736	1.26041	1.242	1.93422	1.00524	1.53355	1.69901	2.23019	1.07838	1.3369	1.19205	1.37187	2.45988	2.15986	1.70285	1.83527	1.64798	1.3039	0.98499	1.39919	1.07457	1.81011	1.76457	1.70375	1.22299	1.65482	1.22194	1.31367	1.32605	1.77186	1.61873	1.76066	1.95301	1.90268	1.39749	1.85773	1.33406	1.86986	1.26908	1.7107	1.22763	2.60174	1.09791
	10.3963	1.40184	1.60672	1.67425	1.3083	2.20658	1.55726	1.32896	1.34042	2.01627	1.05144	1.62993	1.81929	2.22436	1.13502	1.44265	1.23557	1.43944	2.59859	2.33273	1.7534	1.92987	1.72974	1.34345	1.01231	1.48528	1.13442	1.76992	1.82414	1.73209	1.29891	1.8285	1.29062	1.36161	1.36673	1.88964	1.76059	1.80165	2.0887	1.94898	1.35069	1.97982	1.45443	1.95105	1.38623	1.91084	1.26618	2.58714	1.25632
	10.4296	1.56123	1.63931	1.78614	1.41316	2.31311	1.5705	1.3874	1.36749	2.24843	1.08839	1.68083	1.83306	2.43399	1.15918	1.50472	1.3365	1.47512	2.62837	2.44932	1.92401	1.95162	1.71784	1.38469	1.06113	1.53841	1.10121	1.83619	1.86149	1.79854	1.35231	1.80394	1.32333	1.41737	1.412	1.94222	1.83305	1.86369	2.18084	2.04955	1.37058	1.98357	1.46496	1.97345	1.48727	1.81994	1.33893	2.60066	1.33511
	10.463	1.50518	1.58617	1.72525	1.41864	2.30994	1.65311	1.41425	1.40463	2.1141	1.09263	1.67836	1.8744	2.38926	1.18553	1.49922	1.27419	1.60134	2.4699	2.41539	1.92135	1.96579	1.74385	1.40886	1.08016	1.63173	1.2118	1.98605	1.85336	1.84409	1.3905	1.89584	1.3488	1.36179	1.50829	1.93766	1.82507	1.92524	2.26268	2.01984	1.49907	2.03354	1.43978	2.08556	1.46079	1.938	1.35702	2.6459	1.33291
	10.4963	1.57712	1.88366	1.85688	1.46641	2.25592	1.60788	1.52664	1.48694	2.18857	1.16747	1.82962	1.9708	2.49897	1.27214	1.61306	1.44754	1.60189	2.56427	2.69818	2.03013	1.98512	1.83769	1.50395	1.11287	1.7072	1.26224	2.0947	1.99774	1.86621	1.40976	1.93252	1.43828	1.52558	1.52976	2.0388	2.00229	2.04645	2.31212	2.22745	1.53517	2.05902	1.55631	2.14476	1.53867	2.07665	1.42848	2.67727	1.49248
	10.5296	1.61373	1.87776	1.93417	1.58879	2.48952	1.7719	1.53943	1.47744	2.22979	1.20801	1.92984	2.08256	2.46401	1.29564	1.68529	1.43181	1.67161	2.63632	2.69348	2.03575	2.07741	1.89572	1.5675	1.12703	1.64617	1.25204	2.05214	1.98033	1.97322	1.40703	1.98485	1.3615	1.48756	1.62492	2.12735	2.04782	2.0551	2.43717	2.10704	1.48496	2.1932	1.61779	2.15515	1.58428	2.14509	1.41666	2.75541	1.46076
	10.563	1.58206	1.90765	2.00605	1.66843	2.5172	1.68938	1.60302	1.55578	2.3153	1.27078	1.95271	2.0644	2.39974	1.23031	1.72358	1.42884	1.65628	2.69167	2.80804	1.9724	1.96976	1.93538	1.5652	1.16585	1.69651	1.30577	2.03694	1.9527	2.18531	1.49838	1.94071	1.49358	1.47815	1.6429	2.15527	2.07856	2.10675	2.40778	2.2181	1.63624	2.15152	1.5875	2.28178	1.57086	2.14103	1.4781	2.92812	1.4348
	10.5963	1.66685	1.87293	2.07696	1.57544	2.52989	1.78981	1.60834	1.57809	2.44812	1.19418	1.9977	2.23261	2.34798	1.39257	1.76892	1.40132	1.69898	2.58909	2.75051	2.01789	2.04864	1.9698	1.63626	1.16173	1.76846	1.33988	2.22333	2.04016	2.20283	1.63038	2.06481	1.48779	1.55143	1.69745	2.32061	2.09629	2.25807	2.49197	2.46108	1.57208	2.22364	1.67903	2.2977	1.71593	2.40599	1.5359	2.73575	1.57612
	10.6297	1.74223	1.91379	2.04698	1.65861	2.57731	1.8635	1.709	1.63033	2.46482	1.24026	2.11185	2.29204	2.45969	1.37437	1.67793	1.56619	1.68912	2.68144	2.85388	2.07201	2.30245	2.03483	1.65328	1.24531	1.81561	1.33174	2.21835	1.93988	2.15552	1.62026	2.03623	1.55856	1.54323	1.77182	2.40027	2.21953	2.20804	2.44159	2.21819	1.7034	2.17396	1.70615	2.33749	1.63784	2.42809	1.52422	2.65728	1.56743
	10.663	1.79712	2.01423	2.12058	1.64189	2.60633	1.89634	1.68336	1.69799	2.47112	1.36079	2.16476	2.23545	2.48712	1.46385	1.85658	1.59138	1.76173	2.73061	2.72695	2.07588	2.24728	2.1335	1.76777	1.29262	1.79338	1.39669	2.27904	1.94206	2.2984	1.6043	2.17453	1.51047	1.61118	1.80034	2.3113	2.20049	2.44803	2.63437	2.32033	1.71397	2.2726	1.74269	2.28731	1.747	2.48686	1.65497	2.7422	1.68396
	10.6963	1.88461	2.14201	2.31418	1.69316	2.6666	1.79581	1.78823	1.68131	2.47071	1.3739	2.17156	2.23019	2.40526	1.49381	1.85134	1.59048	1.79109	2.41616	3.03302	2.12963	2.31046	2.14374	1.75241	1.2496	1.83213	1.4224	2.28829	2.12357	2.36495	1.53575	2.26567	1.57126	1.55741	1.9149	2.43028	2.15041	2.47429	2.49057	2.16261	1.74194	2.32741	1.74673	2.46826	1.78296	2.41865	1.70215	2.57635	1.729
	10.7296	1.76009	1.99832	2.28776	1.7332	2.54878	1.88801	1.81877	1.77633	2.38915	1.30533	2.19518	2.25003	2.36387	1.52531	1.90671	1.63926	1.76448	2.48435	2.76319	2.01098	2.34654	2.10763	1.80513	1.37555	1.84432	1.41247	2.23831	1.93519	2.2574	1.61077	2.23579	1.53424	1.63526	1.82538	2.27663	2.14552	2.23195	2.43719	2.32676	1.67921	2.26292	1.79123	2.38402	1.77488	2.51093	1.64444	2.58053	1.71787
	10.763	1.77134	2.05399	2.24356	1.79128	2.38405	1.98598	1.84366	1.69844	2.44689	1.38861	2.22025	2.23044	2.36638	1.53365	1.99736	1.59283	1.85567	2.32206	2.78917	2.16371	2.3092	2.21718	1.84323	1.31163	1.86152	1.43389	2.2332	2.04867	2.36158	1.74716	2.24707	1.52784	1.6435	1.86653	2.41929	2.21418	2.27463	2.51895	2.49123	1.78444	2.29631	1.85446	2.40521	1.77649	2.41994	1.73762	2.58073	1.65865
	10.7963	1.72392	2.2836	2.27645	1.77735	2.45006	1.96143	1.81913	1.77064	2.36851	1.43064	2.36391	2.28379	2.4281	1.59465	1.9488	1.61172	1.81185	2.33947	2.77114	2.09194	2.3494	2.09678	1.92332	1.31742	1.94264	1.46715	2.4385	2.0161	2.45063	1.69792	2.3097	1.52849	1.72646	1.9318	2.4381	2.33453	2.36325	2.52946	2.53445	1.7316	2.33478	1.75099	2.40859	1.80945	2.41942	1.82702	2.49609	1.81801
	10.8296	1.75985	2.10888	2.28023	1.81326	2.45522	1.89718	1.79997	1.73556	2.35491	1.38284	2.29472	2.25696	2.28856	1.58214	1.99982	1.5986	1.89855	2.4913	2.76796	2.16052	2.30657	2.33107	1.88871	1.36536	1.95573	1.44613	2.39728	2.12322	2.37278	1.71574	2.30231	1.56687	1.73158	1.96575	2.3896	2.16765	2.24501	2.63434	2.49829	1.83087	2.27646	1.79825	2.4239	1.85163	2.42731	1.77651	2.4313	1.79877
	10.8629	1.838	2.31209	2.22994	1.85471	2.54066	2.05166	1.91868	1.83783	2.33124	1.39767	2.37146	2.46758	2.41127	1.64349	1.92353	1.63736	1.83429	2.51844	2.92167	2.09053	2.47819	2.23278	1.94391	1.31426	1.98862	1.52244	2.32227	2.06837	2.47181	1.81908	2.35936	1.58176	1.76974	1.96167	2.5527	2.25253	2.31503	2.47035	2.46439	1.80709	2.33035	1.86699	2.40084	1.90643	2.38149	1.78927	2.49909	1.82093
	10.8963	1.96333	2.17316	2.21522	1.81343	2.56745	1.93208	1.86544	1.7943	2.37992	1.44	2.43019	2.45597	2.32873	1.65614	2.02791	1.6485	1.96144	2.43106	2.76547	2.07853	2.4173	2.0971	1.9438	1.34077	2.03904	1.51222	2.41111	2.08515	2.53266	1.86682	2.34176	1.70017	1.73217	2.0593	2.41139	2.34429	2.37102	2.47872	2.69295	1.81867	2.28022	1.94569	2.50798	1.86005	2.5385	1.87726	2.40259	1.87724
	10.9296	1.79765	2.35758	2.35716	1.84145	2.60288	1.91134	1.96653	1.84794	2.50156	1.38676	2.41673	2.27818	2.3181	1.62652	2.14496	1.60829	1.95174	2.36092	2.84254	2.14557	2.45024	2.15754	1.97493	1.40654	2.18348	1.5871	2.34342	2.21692	2.51815	1.83179	2.48925	1.72689	1.78852	2.10864	2.53805	2.22909	2.34474	2.48776	2.44582	1.88689	2.43487	1.97535	2.42976	1.92589	2.3997	1.83123	2.49486	2.01435
	10.963	1.86768	2.37067	2.32667	1.94002	2.59463	2.03076	1.90417	1.90399	2.51059	1.45977	2.48471	2.35387	2.26043	1.7078	2.10101	1.78992	1.96749	2.43292	2.67787	2.2271	2.38939	2.19857	2.03839	1.42882	2.18757	1.57622	2.42571	2.12692	2.3927	1.80097	2.42498	1.63394	1.82624	1.97813	2.56534	2.25423	2.29393	2.43855	2.63344	1.73198	2.3632	1.92309	2.35681	2.0336	2.37786	2.0694	2.47255	1.97125
	10.9963	1.81472	2.37395	2.23103	1.90033	2.41811	2.09073	1.95034	1.82667	2.3103	1.49611	2.38896	2.37502	2.22389	1.65216	2.18482	1.81582	1.98582	2.35819	2.75093	2.17634	2.57121	2.27255	1.80181	1.39152	2.0521	1.56436	2.38468	2.2486	2.4326	1.91849	2.40636	1.58323	1.78536	2.19706	2.50529	2.24017	2.18881	2.5751	2.53745	1.94234	2.29997	1.94672	2.43791	1.97595	2.53341	1.98498	2.5685	2.06264
	11.0296	1.97192	2.23873	2.18282	1.84453	2.40147	1.97713	1.91106	1.89511	2.45407	1.51673	2.38121	2.44839	2.15905	1.7972	2.14889	1.80183	1.96928	2.37884	2.74659	2.08079	2.45436	2.28604	1.85556	1.43817	2.13093	1.49578	2.21872	2.18537	2.47655	1.86559	2.35568	1.61539	1.79354	1.9588	2.46314	2.12717	2.26014	2.39387	2.5085	1.88764	2.46986	1.89841	2.45378	1.90266	2.39249	1.97834	2.44348	1.97028
	11.063	1.74536	2.29734	2.25316	1.88324	2.463	2.00359	2.0471	1.98473	2.40282	1.39739	2.49539	2.3085	2.33493	1.77417	2.19688	1.87239	2.04239	2.38939	2.83305	2.17784	2.36411	2.20429	1.96159	1.54152	2.23007	1.49922	2.35861	2.16081	2.48347	1.85317	2.36777	1.67056	1.88354	2.13305	2.51043	2.18484	2.23472	2.40567	2.53353	1.89605	2.41979	2.08096	2.48466	1.97765	2.33988	2.05118	2.50376	1.98265
	11.0963	1.97504	2.32697	2.27234	1.9487	2.45545	1.90956	1.93697	1.89162	2.34046	1.57692	2.51414	2.43992	2.31076	1.77924	2.22409	1.96287	2.00831	2.44761	2.83452	2.25012	2.42992	2.33511	1.93005	1.53204	2.14785	1.58617	2.38267	2.33768	2.44972	2.03729	2.47008	1.74698	1.96395	2.22622	2.46974	2.22886	2.32029	2.47427	2.64596	2.00029	2.41847	2.10022	2.47341	2.02525	2.34013	2.14132	2.39073	2.07965
	11.1296	1.84588	2.2858	2.21481	1.92328	2.27287	2.02005	1.94181	1.87295	2.23074	1.50169	2.42897	2.43506	2.22598	1.81924	2.18586	1.86388	2.13383	2.25049	2.77251	2.12908	2.34357	2.42236	1.98806	1.51174	2.17239	1.60669	2.37293	2.17706	2.47445	1.85444	2.43276	1.69712	1.89634	2.21166	2.56236	2.28311	2.25931	2.39883	2.57869	1.94123	2.3668	1.94813	2.41876	2.07272	2.64769	2.13197	2.42407	2.07475
	11.1629	1.88133	2.41408	2.25731	1.96822	2.3845	1.92602	1.9968	1.92353	2.22854	1.51827	2.50199	2.36331	2.25998	1.83367	2.27794	1.99427	1.99688	2.40224	2.73697	2.24227	2.50409	2.37299	2.04889	1.55203	2.11368	1.52601	2.27943	2.23912	2.52873	2.10624	2.35075	1.71916	1.97351	2.20448	2.60328	2.23962	2.24406	2.4559	2.59228	1.95127	2.36569	1.95081	2.45951	2.07892	2.35305	2.19428	2.40682	2.1436
	11.1963	1.98156	2.67138	2.16849	2.01444	2.43555	1.99595	1.9901	1.94084	2.20741	1.46681	2.4094	2.32787	2.18455	1.86474	2.29422	1.78442	2.06396	2.30849	2.60067	2.22725	2.3405	2.34525	2.06512	1.56825	2.18517	1.5878	2.3313	2.18861	2.45307	1.97605	2.42662	1.66581	2.06182	2.20895	2.58827	2.15602	2.19455	2.47306	2.45667	1.96238	2.38333	1.99203	2.36053	1.94744	2.38321	2.16953	2.43221	2.09692
	11.2296	1.94436	2.35729	2.16797	1.92635	2.36544	1.90211	2.04743	1.92328	2.30837	1.51443	2.48709	2.26414	2.19116	1.88271	2.2696	1.87826	2.08427	2.27195	2.65202	2.07522	2.46964	2.26375	2.00352	1.52783	2.37749	1.66088	2.22765	2.21744	2.41541	1.96527	2.36729	1.68607	1.91329	2.2608	2.42335	2.28277	2.16315	2.46983	2.48234	1.96188	2.46314	1.95457	2.52351	2.06206	2.41507	2.17624	2.44705	2.15682
	11.263	2.02006	2.42266	2.04332	2.07082	2.33326	1.92744	2.07107	1.9774	2.21944	1.61427	2.47577	2.23249	2.1586	1.8211	2.30082	1.84401	2.04265	2.27696	2.59427	2.20983	2.56358	2.32348	2.04108	1.51749	2.27603	1.61406	2.37667	2.1299	2.53804	2.05965	2.24498	1.63983	2.05941	2.34236	2.59878	2.34049	2.22404	2.37156	2.45156	1.97329	2.2989	2.0846	2.45001	2.15324	2.27924	2.19221	2.45895	2.30489
	11.2963	1.86671	2.34634	2.10398	2.05766	2.26076	1.91876	1.95048	1.90493	2.16472	1.54969	2.3698	2.33238	2.12895	1.82845	2.31484	1.9756	2.0299	2.20453	2.49319	2.18284	2.3329	2.24102	2.05674	1.67067	2.26886	1.59264	2.28224	2.16333	2.42171	2.00822	2.25362	1.73555	2.07588	2.16911	2.27531	2.26992	2.16861	2.4133	2.39371	2.02095	2.36742	2.02237	2.4964	1.99904	2.26704	2.15546	2.50868	2.08841
	11.3296	2.12399	2.37524	2.05237	1.96824	2.3667	1.98957	2.04876	2.02401	2.3672	1.52465	2.4392	2.28007	2.16068	1.87926	2.31108	1.91512	2.12491	2.30748	2.64376	2.07268	2.41115	2.33391	2.02891	1.65255	2.37295	1.70744	2.15967	2.19592	2.46235	2.14735	2.37074	1.78953	2.11268	2.20336	2.48592	2.29386	2.20864	2.53242	2.5101	2.02795	2.4178	2.05416	2.42021	2.09066	2.33893	2.14913	2.51342	2.33225
	11.363	2.06827	2.45849	2.07005	2.04976	2.27212	1.92419	2.04143	1.86689	2.42214	1.63738	2.35779	2.0436	2.16662	1.90272	2.17103	1.99052	2.0853	2.35214	2.66065	2.23102	2.54094	2.25143	2.08483	1.57703	2.31415	1.69595	2.21066	2.17314	2.48115	2.04769	2.29287	1.86623	2.04302	2.23917	2.42044	2.25374	2.28266	2.50422	2.50709	2.03169	2.4007	1.99944	2.44108	2.08684	2.33444	2.08847	2.50075	2.25572
	11.3963	2.00447	2.35178	2.18126	2.01424	2.28682	2.00934	2.12705	2.0072	2.2657	1.69607	2.4052	2.307	2.05715	1.8621	2.36653	1.96995	2.15962	2.21293	2.86742	2.12736	2.38097	2.44857	2.16875	1.58649	2.25052	1.73421	2.23618	2.16039	2.46938	2.15733	2.49316	1.78937	2.06206	2.30691	2.41657	2.17023	2.39626	2.49951	2.50538	2.05684	2.3673	2.00892	2.39739	2.11951	2.31837	2.22227	2.41087	2.28145
	11.4296	1.89029	2.46234	2.11958	2.078	2.49614	2.08043	2.0366	1.89288	2.35644	1.62122	2.38476	2.20747	2.09064	1.91166	2.37519	2.00013	2.06296	2.3322	2.45204	2.06417	2.42864	2.26235	2.055	1.59976	2.33793	1.67006	2.15623	2.12855	2.43386	2.16155	2.19507	1.7457	2.01976	2.11027	2.37483	2.13266	2.34191	2.38072	2.50274	2.09736	2.30706	1.85362	2.31756	2.19047	2.23873	2.23942	2.42657	2.16046
	11.4629	2.06901	2.33376	2.07771	2.11869	2.25473	2.00153	2.01549	1.99649	2.25974	1.60084	2.35707	2.16432	2.17865	1.96908	2.27012	1.90722	2.08137	2.23729	2.27575	2.12406	2.6389	2.31375	2.08259	1.56186	2.28316	1.75168	2.10882	2.17514	2.44134	2.14652	2.32869	1.75418	2.10353	2.19079	2.47249	2.0982	2.35353	2.30299	2.48593	2.07567	2.46088	1.91076	2.47468	1.98581	2.40082	2.17264	2.32848	2.14704
	11.4963	1.87942	2.43653	2.19724	2.0902	2.23882	1.92172	2.06246	2.01595	2.3419	1.60699	2.31273	2.19684	2.13379	1.94308	2.24519	1.98286	2.14614	2.44089	2.48522	2.19016	2.31175	2.27114	2.0487	1.63168	2.26095	1.6107	2.25899	2.16786	2.39699	2.13203	2.41882	1.90839	2.07648	2.20513	2.5555	2.17964	2.28624	2.34942	2.34172	2.15684	2.32894	1.86869	2.40167	2.10471	2.09837	2.30994	2.49053	2.35702
	11.5296	2.05795	2.23978	2.13113	2.02713	2.30456	2.16338	2.05304	1.98859	2.18633	1.61396	2.4515	2.17131	2.11793	1.92453	2.22523	1.92687	2.04134	2.25399	2.62888	2.20638	2.41719	2.22117	2.11095	1.59894	2.23712	1.72209	2.18382	2.21833	2.46764	2.2763	2.2559	1.96443	2.09061	2.15794	2.43321	2.25099	2.39135	2.32743	2.3431	2.08123	2.30586	1.99088	2.32332	1.95543	2.35355	2.14436	2.43643	2.19519
	11.563	2.07409	2.25716	2.12813	2.02008	2.3203	2.12501	2.16652	1.89622	2.20735	1.66047	2.38044	2.08565	2.18636	2.00534	2.19113	1.99666	2.30476	2.40874	2.57875	2.13355	2.44432	2.24852	2.11933	1.66732	2.357	1.72161	2.15092	2.17043	2.37643	2.31334	2.25006	1.80192	2.17853	2.3178	2.40228	2.15118	2.33859	2.31416	2.36855	2.10446	2.40926	1.94487	2.33743	2.02953	2.31016	2.19843	2.42657	2.23472
	11.5963	2.04797	2.26776	2.09868	2.04411	2.26279	2.16511	2.07227	1.85576	2.1686	1.72271	2.35183	2.20409	2.18497	1.95559	2.33202	2.04385	2.14755	2.34775	2.47963	2.10639	2.38399	2.2063	2.07053	1.67757	2.41097	1.79086	2.04576	2.15811	2.31545	2.35324	2.31489	1.88419	2.16739	2.1081	2.53671	2.23084	2.34835	2.47217	2.32592	1.99037	2.38673	2.00954	2.3077	2.15295	2.22046	2.19401	2.33494	2.38972
	11.6296	2.14393	2.21003	2.09396	2.21068	2.22375	2.01686	2.15974	1.97713	2.2169	1.72677	2.37542	2.13161	2.2003	1.99285	2.32954	1.97388	2.20398	2.29557	2.51232	2.10455	2.49292	2.27123	2.09981	1.55314	2.29292	1.62809	2.03141	2.15116	2.44263	2.38703	2.30639	1.90801	2.13052	2.12672	2.45929	2.14502	2.28512	2.34579	2.37808	2.10608	2.30038	1.81525	2.27343	2.08224	2.26781	2.13809	2.38822	2.21435
	11.663	1.92848	2.24307	2.12414	2.28741	2.25281	2.12297	2.19451	1.96267	2.30965	1.78327	2.38735	2.13713	2.23162	1.96615	2.25014	2.01804	2.17364	2.38472	2.54347	2.01055	2.45494	2.20046	2.00463	1.5984	2.26064	1.68514	2.02799	2.16507	2.54592	2.25896	2.23188	1.92246	2.08501	2.21472	2.3436	2.14436	2.40959	2.5379	2.33467	2.15704	2.37257	1.91804	2.30148	2.14072	2.4173	2.12247	2.28843	2.23236
	11.6963	2.1172	2.22466	2.13017	2.24374	2.21484	1.99411	2.19335	1.93658	2.17362	1.72318	2.37613	2.16478	2.27291	2.02924	2.2608	2.10302	2.30856	2.26337	2.42533	2.08785	2.50208	2.25435	2.04896	1.67555	2.20094	1.6622	1.96797	2.2347	2.33357	2.44325	2.23856	1.9484	2.11479	2.27726	2.48404	2.18066	2.22837	2.47628	2.41021	2.28074	2.35246	1.95337	2.50533	2.02901	2.27821	2.17659	2.33297	2.36012
	11.7296	2.14118	2.46428	2.02373	2.2836	2.24714	2.03467	2.10269	1.88607	2.25588	1.68937	2.29604	2.13219	2.27812	1.9963	2.22143	2.09513	2.14682	2.29267	2.61869	2.07269	2.39854	2.31133	1.99765	1.60623	2.4911	1.67229	1.9744	2.11666	2.45899	2.25194	2.21716	1.92353	2.20381	2.19277	2.50616	2.14632	2.31567	2.37014	2.43734	2.15888	2.32365	1.91906	2.31472	2.03471	2.36558	2.20341	2.29849	2.28048
	11.763	1.99999	2.47097	2.10919	2.27283	2.17561	2.05023	2.25036	1.97944	2.26903	1.72689	2.29293	2.13014	2.29887	2.04856	2.32172	2.04377	2.1171	2.36827	2.43485	1.97112	2.42537	2.21135	1.91633	1.60603	2.3642	1.63034	1.98059	2.22698	2.40256	2.30516	2.27199	1.9571	2.20765	2.19216	2.42988	2.14246	2.32065	2.45709	2.48323	2.04254	2.26548	2.03974	2.25061	1.99616	2.28444	2.20857	2.24491	2.16035
	11.7963	1.89486	2.37945	2.0758	2.24744	2.23043	1.97781	2.13883	2.00983	2.27501	1.71998	2.31668	2.00675	2.121	1.95755	2.21487	2.03464	2.16256	2.21517	2.54779	2.07818	2.44334	2.167	1.91829	1.62194	2.23496	1.67447	1.88635	2.22778	2.32221	2.26573	2.23095	1.93774	2.17564	2.3179	2.40624	2.16127	2.34171	2.39669	2.34641	2.02806	2.293	2.1133	2.25453	2.06012	2.15817	2.30596	2.52948	2.42441
	11.8296	2.04888	2.38663	2.03417	2.1842	2.23476	2.17569	2.08563	1.87898	2.24535	1.74266	2.2343	2.24242	2.13303	2.03155	2.24309	1.92239	2.21176	2.39845	2.65742	2.11194	2.28779	2.20774	1.95793	1.58187	2.34806	1.65257	1.84111	2.19675	2.38554	2.34924	2.2249	2.01792	2.17568	2.349	2.49747	2.12681	2.43569	2.26527	2.24541	2.13808	2.3142	1.98518	2.3236	1.99132	2.32092	2.05877	2.30709	2.32773
	11.8629	2.04787	2.34684	2.0963	2.22328	2.36489	1.99654	2.0312	1.88237	2.16345	1.78233	2.34353	2.1247	2.17521	1.95167	2.19576	2.00062	2.09073	2.24123	2.42999	2.09073	2.51211	2.20498	1.86782	1.54343	2.37914	1.63737	1.84357	2.06855	2.32261	2.19421	2.178	1.93472	2.06689	2.08921	2.32291	1.97661	2.28937	2.25601	2.26495	2.15044	2.10236	2.01924	2.28112	2.0184	2.26439	2.12074	2.34551	2.29343
	11.8963	2.00796	2.42814	2.0659	2.22741	2.12486	1.99083	2.16125	1.94657	2.27927	1.86469	2.30598	2.2559	2.12863	2.03823	2.28273	2.14602	2.10474	2.22627	2.46657	2.05008	2.3191	2.14249	1.97055	1.64395	2.23171	1.68994	1.88513	2.1814	2.29718	2.39786	2.16684	1.94612	2.11436	2.20738	2.62251	2.12199	2.29203	2.41833	2.39321	2.04093	2.24863	2.00761	2.27662	2.0385	2.24748	2.1726	2.39323	2.33808
	11.9296	2.02809	2.35123	2.09168	2.15645	2.09584	2.00436	2.03077	1.97996	2.13648	1.84407	2.24598	2.03036	2.30164	1.98504	2.21514	2.0449	2.12507	2.35451	2.58902	2.00598	2.3185	2.13264	1.96483	1.5931	2.3634	1.68921	1.98696	2.16377	2.39353	2.44453	2.29175	1.83376	2.20888	2.13594	2.44638	2.08584	2.16957	2.27092	2.35386	2.13849	2.24856	1.93462	2.23327	2.0143	2.19768	2.18964	2.29913	2.41498
	11.963	1.89496	2.39342	2.13902	2.21832	2.07526	2.07514	2.03057	1.89038	2.15422	1.80356	2.32049	2.08793	2.213	1.97318	2.16267	2.01801	2.19903	2.25437	2.42664	2.02145	2.37731	2.1849	2.01817	1.60948	2.33969	1.69753	1.91473	2.22065	2.37862	2.41187	2.13905	2.02192	2.11471	2.18959	2.52541	2.11257	2.32439	2.34934	2.38436	2.178	2.22237	2.02322	2.31306	1.88409	2.20309	2.14662	2.30135	2.36985
	11.9963	1.91809	2.14647	2.13049	2.14644	2.27011	2.04656	2.00968	1.8936	1.99725	1.85781	2.33144	2.07073	2.1728	1.98702	2.15217	2.10786	2.10529	2.32927	2.31788	2.0495	2.22826	2.12764	1.9275	1.6039	2.21719	1.57939	1.76831	2.10217	2.3975	2.37878	2.24908	2.00474	2.17606	2.12999	2.39129	2.08337	2.2174	2.24969	2.24633	2.06366	2.1767	1.83448	2.23042	1.93321	2.1854	2.14716	2.22674	2.239
	12.0296	1.89338	2.32607	2.16156	2.26652	2.15488	2.04368	2.11703	1.86293	2.22918	1.79387	2.32995	2.07685	2.22966	1.93848	2.19103	2.04331	2.1356	2.35815	2.42924	2.03522	2.3114	2.12999	2.06898	1.68413	2.15674	1.62461	1.78427	2.16164	2.37849	2.37896	2.26701	1.93589	2.11814	2.0456	2.50185	2.03412	2.21597	2.42102	2.4346	2.20088	2.15488	1.94452	2.2211	1.97528	2.2846	2.09535	2.26405	2.39993
	12.063	2.08178	2.2606	1.9973	2.19254	2.06614	1.93067	2.06279	1.81233	2.13084	1.77104	2.14541	2.04176	2.12567	2.03237	2.19963	1.97486	2.20718	2.35534	2.43566	1.95552	2.30679	2.08576	2	1.70781	2.30166	1.54657	1.82528	2.07641	2.35197	2.3398	2.25615	1.95252	2.06087	2.19884	2.47071	2.08664	2.17518	2.25577	2.28483	2.14078	2.20659	1.93385	2.31817	1.88248	2.25211	2.12941	2.25386	2.37385
	12.0962	1.92502	2.12614	2.06115	2.17546	2.14732	1.97547	2.03391	1.90663	2.05194	1.81074	2.11731	2.12289	2.19916	1.95587	2.13655	2.05713	2.17387	2.27202	2.51091	2.02954	2.3031	2.07561	1.9791	1.66262	2.25495	1.62194	1.78605	2.13645	2.39596	2.41537	2.26969	1.98857	2.11657	2.07401	2.21375	2.07188	2.16691	2.3106	2.29751	2.02713	2.17046	1.9845	2.23031	2.01393	2.18936	2.18678	2.2891	2.19464
	12.1296	1.84946	2.23023	2.10682	2.17412	2.1084	1.92816	2.08166	1.95837	2.15705	1.86171	2.31971	2.09977	2.19454	1.98175	2.28797	2.0145	2.3141	2.45224	2.51075	2.01547	2.22079	2.02379	2.11332	1.76964	2.34512	1.57228	1.70182	2.17699	2.26952	2.21503	2.23155	2.07746	2.0614	2.06675	2.4479	2.16711	2.09377	2.30648	2.32287	2.14277	2.16771	1.91737	2.19002	1.95814	2.09305	2.23919	2.20893	2.33341
	12.163	1.90373	2.27446	2.06559	2.15742	2.07232	2.05764	2.03518	1.90194	2.11186	1.94287	2.23776	1.95189	2.26436	1.98873	2.21763	2.049	2.19092	2.38452	2.34247	2.00378	2.25092	2.13917	2.11269	1.62598	2.35338	1.63636	1.81305	2.04732	2.30709	2.31082	2.25169	1.96846	2.16584	2.07583	2.51612	2.10291	2.14142	2.3652	2.34726	2.03473	2.11666	1.98056	2.27264	1.93977	2.16901	2.21668	2.41622	2.35165
	12.1963	1.92833	2.27138	2.09928	2.25882	2.19739	1.98905	2.08458	1.9222	2.15681	1.94444	2.18736	2.04165	2.23504	1.97788	2.23407	2.19819	2.12496	2.31894	2.44349	2.08851	2.26375	2.06726	2.07522	1.70782	2.30521	1.67232	1.83388	2.10984	2.31285	2.28042	2.11076	1.94905	2.06566	2.10395	2.32951	2.02122	2.06096	2.36308	2.27463	2.09326	2.22485	1.98787	2.26706	1.88892	2.02606	2.14847	2.44039	2.24427
	12.2296	1.90056	2.22976	2.1043	2.19905	2.04669	1.92165	1.96425	1.88172	2.03426	1.82235	2.21903	2.0034	2.11443	1.88918	2.2476	2.08857	2.06098	2.43219	2.36833	2.04925	2.29052	2.10348	2.11298	1.81393	2.23887	1.5283	1.833	2.14402	2.31143	2.28133	2.24398	1.9869	2.09931	2.03632	2.31537	2.00224	2.01105	2.30988	2.24361	2.09963	2.15498	1.87166	2.24586	1.91108	2.27222	2.19299	2.29691	2.25963
	12.263	1.79617	2.19489	2.03575	2.13892	2.13478	1.81507	2.04503	1.81982	2.18714	1.86582	2.28163	2.16298	2.30878	1.98428	2.04303	2.1046	2.13146	2.31324	2.29021	1.88605	2.28676	2.0492	2.15996	1.68508	2.10306	1.61472	1.80118	2.19868	2.32594	2.42423	2.13342	1.98547	2.05462	2.23945	2.26478	2.1318	2.0522	2.37255	2.2774	2.02021	2.16941	1.9061	2.26758	1.89066	2.21798	2.15063	2.24239	2.29542
	12.2963	1.89861	2.12821	2.03489	2.14548	2.07858	1.86669	2.03518	1.81947	2.13924	1.75876	2.30009	1.96842	2.22577	1.94097	2.17393	2.07098	2.06511	2.39912	2.38525	1.99862	2.27459	2.2218	1.99209	1.78511	2.35845	1.5943	1.80392	2.16845	2.20385	2.30853	2.16564	2.04948	2.07244	2.21672	2.43133	2.06128	2.07649	2.3679	2.24969	1.91998	2.12165	1.93746	2.19432	1.95269	2.13687	2.10216	2.24607	2.25664
	12.3296	1.93004	2.09929	2.12049	2.2477	2.06187	1.96508	2.05382	1.8458	2.2097	1.91297	2.18022	2.09899	2.27861	2.01433	2.13336	2.05905	2.18749	2.34169	2.31345	2.00331	2.26503	2.17124	2.12333	1.75515	2.26795	1.69589	1.73754	2.09774	2.37033	2.34652	2.16298	2.08465	2.06759	2.16072	2.33381	2.11642	1.9708	2.31885	2.1925	2.08002	2.15173	1.92787	2.21468	1.89809	2.18647	2.21231	2.27002	2.24935
	12.363	1.90003	2.20491	2.12856	2.23449	2.1658	1.97485	2.05349	1.82348	2.06517	1.91266	2.25187	2.08694	2.29317	2.00587	2.1981	2.10668	2.17138	2.45977	2.25037	2.02273	2.24207	2.12363	2.07984	1.83326	2.17919	1.66752	1.83619	2.18303	2.42052	2.41389	2.16492	2.05342	2.10166	2.2315	2.43973	2.03845	2.13233	2.36149	2.31033	2.15328	2.10441	1.80015	2.17108	1.90378	2.23608	2.05726	2.21187	2.18714
	12.3963	1.89337	2.36594	2.09029	2.22392	2.03788	1.85278	2.0623	1.81054	2.21647	1.89599	2.14549	2.0539	2.26125	1.89209	2.2824	2.00484	2.09071	2.38804	2.38003	1.96495	2.23641	2.097	2.01351	1.84258	2.18619	1.58662	1.80324	2.1713	2.37482	2.37431	2.16485	2.09965	1.97604	2.15065	2.40071	2.10704	2.06262	2.36725	2.14283	2.07151	2.06046	1.86185	2.19856	1.88541	2.06347	2.08727	2.1788	2.18099
	12.4296	1.80638	2.23481	2.1003	2.31461	2.1627	1.90186	1.99265	1.80265	2.0838	1.8554	2.20528	2.07487	2.18869	1.96512	2.18312	2.15883	2.16643	2.25009	2.34308	1.98728	2.28151	1.97314	2.08317	1.86657	2.19512	1.66709	1.84038	2.07995	2.31653	2.39897	2.25836	1.94519	2.06246	2.22569	2.30467	2.13742	2.21104	2.27793	2.30302	2.08495	2.08733	2.11158	2.16203	1.98951	2.06133	2.07852	2.18351	2.36709
	12.463	1.99181	2.25043	2.15251	2.36934	2.20311	2.04513	2.0446	1.79493	2.12468	2.00522	2.16786	2.04604	2.24416	2.02913	2.16453	2.15363	2.19871	2.37295	2.29871	1.90442	2.18327	2.07366	1.97567	1.83777	2.30881	1.6687	1.86044	2.08496	2.36674	2.4314	2.16182	1.95464	2.00171	2.10385	2.32586	2.07097	2.07625	2.32873	2.26371	1.91782	2.11401	1.87486	2.10667	1.9627	2.23014	2.16831	2.21552	2.23292
	12.4963	1.92738	2.23631	2.15739	2.35004	2.13872	1.96808	2.06205	1.83141	2.19828	1.85208	2.19025	2.04452	2.1517	1.9691	2.182	2.13691	2.08817	2.33302	2.33845	1.95802	2.30228	2.09428	2.05166	1.90747	2.20271	1.57398	1.91023	2.04509	2.34858	2.48076	2.12766	2.16288	1.99779	2.087	2.35628	2.14564	2.12351	2.23799	2.11357	1.99153	2.1674	2.02312	2.22852	1.9644	2.12488	2.08171	2.22422	2.14026
	12.5297	1.84058	2.35623	2.13791	2.26939	2.03043	1.80248	2.0171	1.75594	2.15828	1.91807	2.12476	1.9513	2.19058	1.99968	2.23555	1.96129	2.15047	2.29733	2.34945	1.8911	2.25485	2.06878	2.02068	1.79906	2.09841	1.5685	1.88582	2.13607	2.24253	2.4118	2.12726	2.00068	1.96542	2.11851	2.44129	2.10007	2.05009	2.33328	2.15954	2.04005	2.14167	1.91357	2.09873	1.89888	2.00778	1.97105	2.33267	2.16044
	12.5629	1.78143	2.16309	2.14475	2.23091	2.1313	1.93259	1.95254	1.78267	2.16151	1.95344	2.23063	2.10561	2.2553	1.92565	2.21646	1.97273	2.14886	2.39007	2.20561	1.90915	2.30251	2.0432	1.99672	1.80571	2.31983	1.56622	1.89092	2.04223	2.36091	2.33762	2.1909	1.99229	1.97466	2.13817	2.34692	2.14112	2.02102	2.34063	2.22205	1.95166	2.05001	1.98996	2.10732	1.88429	1.99201	2.09886	2.14018	2.27212
	12.5963	1.82076	2.38104	2.25769	2.2309	2.0931	2.00906	1.95346	1.78407	2.073	1.74275	2.17659	1.95426	2.23214	1.9501	2.2082	2.10849	1.98684	2.19873	2.26922	1.99792	2.20618	2.18229	1.97923	1.79754	2.30704	1.6179	1.95443	2.08633	2.4237	2.3557	2.1555	2.16409	2.00696	2.19926	2.40842	2.17027	1.99672	2.32421	2.21467	1.99859	2.20166	1.88857	2.20441	1.9526	2.16272	2.03223	2.15773	2.09207
	12.6296	1.73024	2.27	2.14852	2.17563	2.12927	2.0552	2.0533	1.77504	2.33103	1.85129	2.15258	2.08189	2.33833	1.95009	2.21439	2.05529	2.06595	2.27207	2.33617	1.97041	2.20192	2.15414	2.0633	1.91289	2.1963	1.58931	1.93986	2.02485	2.35177	2.35957	2.16431	1.99014	2.0205	1.95704	2.25039	2.09864	2.08332	2.31993	2.22625	1.89893	2.09003	1.81623	2.16119	1.92599	2.25555	2.09135	2.18888	2.13126
	12.663	1.81316	2.15372	2.13517	2.15047	2.13297	1.85375	1.98812	1.79347	2.20318	1.99668	2.10343	2.13504	2.22723	1.9734	2.24151	1.99554	1.96284	2.32117	2.24516	1.94575	2.27147	1.98139	1.97799	1.86174	2.19365	1.53251	1.98011	2.04363	2.30508	2.43608	2.17121	1.98153	2.00278	2.01101	2.2919	2.12133	2.00766	2.3073	2.29539	1.97294	2.00359	1.90224	2.15735	1.84695	2.05086	2.06246	2.21671	2.08924
	12.6963	1.73405	2.26371	2.10986	2.1932	2.25224	1.82291	1.99379	1.84071	2.19814	2.06341	2.18801	1.94064	2.278	1.84563	2.19371	1.96274	2.12287	2.38944	2.26919	1.95883	2.11875	2.14998	1.98115	1.76413	2.16527	1.62397	1.86223	1.92192	2.26383	2.4089	2.11587	1.97377	2.05104	2.15083	2.31656	2.21731	2.02415	2.32757	2.17751	1.88528	2.05278	1.84857	2.0929	1.81313	2.16152	2.09139	2.16122	2.12464
	12.7296	1.75616	2.30223	2.09701	2.36784	2.18178	1.9647	2.08688	1.87888	2.17949	2.17952	2.12254	2.10825	2.32464	2.00692	2.1462	2.08271	2.09862	2.43377	2.388	1.9742	2.28008	2.05327	2.12782	1.94041	2.33911	1.58003	1.99101	1.96476	2.41153	2.27068	2.13914	2.00884	2.10105	2.22388	2.19544	2.18497	2.08018	2.3777	2.19666	1.89692	2.05163	1.98733	2.1468	1.86046	2.18677	2.00781	2.20547	2.06847
	12.763	1.81227	2.21114	2.10649	2.20531	2.22528	1.91145	2.01832	1.83998	2.27343	2.11585	2.17675	2.05114	2.24435	1.94176	2.22286	2.03976	2.1304	2.44466	2.3226	1.93897	2.25133	1.95449	2.0675	1.86641	2.17936	1.56945	1.89273	1.96657	2.38621	2.3631	2.22066	1.98015	2.02737	2.03402	2.30791	2.19156	1.99047	2.34314	2.19011	1.96982	2.11086	2.0301	2.19623	1.90619	2.20472	2.06518	2.06153	2.1899
	12.7963	1.66352	2.24933	1.90735	2.07998	2.07856	1.83097	1.96115	1.78112	2.09525	2.30959	2.1902	2.03735	2.17607	1.91199	2.19242	1.98466	1.98846	2.29685	2.35819	1.99441	2.2123	1.97874	1.90235	1.87503	2.07994	1.46248	1.97576	2.01038	2.33436	2.27175	2.0574	1.99768	1.95159	2.07914	2.1892	2.06566	1.95276	2.34992	2.04466	1.8349	2.09389	1.89701	2.04897	1.94621	2.20605	2.05074	2.03177	2.3037
	12.8296	1.68283	2.13387	2.19118	2.14918	2.16722	1.86383	2.03157	1.81008	2.1737	2.19615	2.16715	2.10566	2.30496	1.9951	2.20606	1.99305	2.11872	2.41994	2.17755	1.88501	2.3266	1.93576	2.08996	1.99533	2.2422	1.59201	1.97215	1.99714	2.28075	2.28188	2.20089	2.01642	2.09389	2.25832	2.34446	2.16056	2.11265	2.33527	1.96181	1.96876	2.14463	2.03834	2.1848	1.98992	2.28921	2.07126	2.02958	2.17975
	12.863	1.75732	2.12371	2.21643	2.10588	2.08941	1.84347	2.01496	1.88518	2.309	2.09684	2.11229	2.11891	2.27307	1.99151	2.21316	1.91278	2.02991	2.30877	2.3232	1.97602	2.27464	1.94774	2.05348	1.87164	2.17261	1.52764	1.95704	2.00689	2.50113	2.3357	2.2093	1.99001	2.07617	2.09513	2.33584	2.10633	2.10582	2.27831	2.13349	1.94637	2.04392	2.01701	2.19257	1.95204	2.22682	1.94109	2.00579	2.19199
	12.8963	1.70228	2.2787	2.14831	2.19955	2.08106	1.98839	2.06452	1.92347	2.19089	2.14165	2.28938	2.23122	2.27696	1.99361	2.25329	1.95007	2.15191	2.48045	2.26618	1.90793	2.24593	2.12092	2.08424	1.99241	2.20537	1.51581	2.00121	2.00975	2.36461	2.39823	2.14018	2.03799	2.15313	2.15747	2.36497	2.16381	2.17123	2.32416	2.12135	1.97572	2.06997	2.08388	2.21044	2.02607	2.22646	2.17928	2.13827	2.25305
	12.9296	1.7088	2.33682	2.06224	2.10557	2.17565	1.95652	2.07832	1.86311	2.04952	2.30724	2.29414	2.09612	2.28554	1.98971	2.29995	1.94293	2.01455	2.51677	2.43541	2.05225	2.32814	1.97792	2.12631	1.97402	2.11058	1.58775	1.87145	2.02182	2.40172	2.47646	2.10466	2.05942	2.07611	2.14851	2.40865	2.18243	2.11925	2.32366	2.21411	1.90897	2.10871	1.89245	2.18934	1.9543	2.29996	2.04247	2.13482	2.24111
	12.9629	1.72539	2.23043	2.17005	2.08112	2.10064	1.976	2.12962	1.93266	2.23884	2.41573	2.31978	2.14944	2.24462	2.15761	2.35103	1.98574	2.08324	2.42732	2.38353	1.94495	2.2711	2.11829	2.20068	1.98824	2.23272	1.56976	1.95769	2.06992	2.66995	2.48715	2.00095	2.07726	2.15917	2.03181	2.39282	2.15596	2.14733	2.34245	2.14356	1.98287	2.08526	2.02413	2.15671	2.03917	2.38883	2.09597	2.12724	2.32872
	12.9963	1.75701	2.26141	2.09277	2.02876	2.06537	1.86841	1.95498	1.75369	2.13486	2.1266	2.26116	1.99624	2.09701	1.99008	2.18285	1.83496	1.86523	2.20879	2.24348	1.90918	2.32208	1.89395	2.09054	1.93919	2.15016	1.47775	1.91711	1.82312	2.39525	2.26511	2.04518	2.00153	1.9682	2.01442	2.27651	2.08544	2.10382	2.29451	2.06469	1.85386	1.99041	1.96641	2.05727	1.90912	2.12197	2.07966	2.15394	2.14994
Figure 3G
	Mb1cre/+	Orai1fl/fl Mb1cre/+
	1.65678	0.303878
	2.25339	0.397603
	1.98498	0.386671
	1.98746	1.4854
	2.30829	0.571176
	1.81103	0.17731
	1.87556	0.213004
	1.66182	0.483425
	2.18462	0.46105
	1.96596	0.455302
	2.13568	0.665698
	2.1116	0.497518
	1.99386	0.640277
	1.7481	0.339829
	1.97251	0.239067
	1.8399	0.605009
	1.90594	0.332953
	2.08608	0.271508
	2.67256	0.603098
	1.84465	0.511997
	2.22074	0.51775
	2.06747	0.492753
	1.83069	0.615645
	1.60902	0.202968
	2.02168	0.727747
	1.36749	0.502314
	2.00297	0.869168
	1.95302	0.505406
	2.24338	0.636182
	2.10655	0.735373
	2.07422	0.506848
	1.65818	0.33348
	1.75558	0.37215
	2.00265	0.26887
	2.22752	0.761321
	1.98089	0.77169
	2.11688	0.682302
	2.2322	0.489325
	2.31459	0.632046
	1.8867	0.447211
	2.05163	0.280449
	1.74379	0.310056
	2.1589	0.562741
	1.8111	0.126993
	2.23204	0.613117
	1.92889	0.341762
	2.53716	0.94742
	2.0431	0.471434
	2.15334	0.355252
	2.34741	0.353929
	2.58565	0.978489
	1.1892	1.1277
	1.68094	0.637283
	2.16303	0.284326
	1.37565	0.525368
	2.04665	1.23032
	1.66047	0.413048
	3.08396	0.123983
	1.92758	1.11703
	2.45026	0.710798
	2.42914	0.591816
	2.04561	0.311976
	1.28386	0.473511
	2.26889	0.590258
	2.02438	0.98419
	1.93114	1.33308
	2.47538	0.56887
	1.97854	1.11588
	2.23671	0.628978
	1.86641	0.344752
	2.17347	0.460715
	2.13932	0.213638
	2.38621	0.861126
	2.21918	0.290255
	0.735257	0.393642
	1.7254	0.669304
	1.65628	1.19685
	1.95121	0.911735
	2.22466	0.459656
	2.27649	0.61775
	2.02507	1.44077
	1.1401	1.29962
	1.63897	1.0389
	2.16734	0.691788
	2.04022	0.524568
	2.05259	0.566454
	2.70116	0.321747
	1.64481	0.937944
	3.04298	0.877371
	2.8157	0.400902
	2.4279	0.574907
	2.10204	0.606702
	2.58618	0.497628
	2.19843	0.845877
	1.74514	0.697215
	2.42719	0.708211
	2.13247	0.419438
	1.89911	0.340938
	2.75981	0.328438
	2.84982	0.758881
	2.08866	0.375713
	2.50835	0.829574
	1.93049	0.663885
	1.7762	0.321314
	1.53382	0.419668
	2.16054	0.39863
	2.12017	0.337207
	2.52823	0.634672
	1.95079	0.483143
	2.00316	0.629196
	2.32474	0.443543
	2.16117	0.679143
	1.96655	0.781872
	1.03081	1.08746
	2.05462	0.59686
	2.16464	0.510191
	2.08193	0.49511
	2.00503	0.209206
	1.81924	0.650741
	1.13471	0.140542
	1.93224	0.865811
	1.51841	0.640324
	1.09348	0.588978
	1.13196	0.206856
	2.10155	0.467987
	2.01566	0.216761
	2.072	0.501945
	1.60997	0.454261
	2.24181	0.400054
	1.66453	0.580147
	0.816231	0.548385
	1.6361	0.827855
	1.47607	0.407042
	1.74625	0.762554
	1.86369	0.310596
	1.90141	0.42428
	2.3894	0.441813
	2.25195	0.651745
	1.81521	0.340648
	0.875552	0.43668
	1.65428	0.465054
	1.35392	0.404192
	0.931283	0.179229
	1.45291	0.491239
	0.928207	0.603924
	1.95866	1.11637
	2.74858	0.803507
	1.71253	0.321403
	0.859093	1.02086
	1.02824	0.564718
	2.41042	0.486991
	1.95954	0.470592
	1.04328	0.630664
	0.763072	1.06532
	0.848842	0.668707
	1.48709	0.5848
	2.21443	0.603961
	1.35837	0.533748
	0.730943	0.676082
	2.26545	1.02747
	1.8977	0.724743
	1.63516	0.466915
	1.08431	0.696028
	2.25126	0.590292
	0.969314	0.695891
	1.43912	0.658406
	1.02599	0.568287
	1.70579	0.645145
	0.882157	0.560054
		1.06204
		0.542313
		0.48956
		0.600611
		0.738987
		0.498704
		0.486365
		0.861041
		0.746838
Figure 3H
	Time (Min)
	0	0.406435	0.399084	0.39058	0.370089	0.367645
	0.02965	0.410525	0.386073	0.415379	0.388123	0.392103
	0.063033	0.397253	0.375623	0.382967	0.398386	0.393241
	0.09635	0.394976	0.397903	0.385008	0.398904	0.393069
	0.129683	0.399981	0.400337	0.387314	0.393373	0.379103
	0.163	0.387898	0.386364	0.400377	0.390044	0.395027
	0.196367	0.394658	0.396149	0.390378	0.387141	0.386893
	0.22965	0.3966	0.378143	0.389828	0.384243	0.390272
	0.263017	0.395342	0.361415	0.388944	0.386145	0.375327
	0.296367	0.393891	0.37726	0.392397	0.378215	0.367486
	0.329683	0.39757	0.39041	0.396425	0.381081	0.383054
	0.363	0.386738	0.379987	0.382499	0.374519	0.378529
	0.396333	0.396391	0.38866	0.399826	0.377998	0.399691
	0.429683	0.402409	0.381665	0.39908	0.375195	0.380403
	0.463017	0.38809	0.398089	0.397827	0.37858	0.388013
	0.496367	0.394317	0.396735	0.384198	0.390671	0.387081
	0.529683	0.389648	0.395226	0.39597	0.370332	0.392827
	0.563	0.404947	0.382712	0.394258	0.373409	0.371114
	0.596317	0.395545	0.391771	0.379319	0.379747	0.388257
	0.629667	0.395723	0.396509	0.376063	0.380994	0.400671
	0.66295	0.410269	0.397289	0.389719	0.397696	0.382446
	0.696333	0.392869	0.400158	0.385467	0.379042	0.398504
	0.729633	0.398548	0.390527	0.38912	0.375985	0.379319
	0.762983	0.399037	0.376861	0.383897	0.387845	0.396477
	0.796333	0.401799	0.39311	0.3891	0.381902	0.43112
	0.829667	0.40342	0.403119	0.386417	0.38178	0.429221
	0.863	0.396528	0.374199	0.376568	0.375834	0.425633
	0.896317	0.40423	0.406224	0.388392	0.380344	0.458547
	0.92965	0.410204	0.377445	0.400499	0.371444	0.417899
	0.963033	0.404766	0.383672	0.383967	0.369139	0.444182
	0.996317	0.396923	0.38259	0.385363	0.381993	0.430891
	1.02968	0.403861	0.386064	0.387692	0.363384	0.45426
	1.06302	0.417853	0.403079	0.394542	0.405475	0.474635
	1.09632	0.393765	0.3987	0.398699	0.375595	0.442916
	1.12965	0.409147	0.375955	0.377193	0.378676	0.441939
	1.163	0.407977	0.40681	0.368631	0.387613	0.46308
	1.19632	0.402689	0.382772	0.388957	0.36689	0.45602
	1.22965	0.417283	0.369543	0.401858	0.403042	0.447228
	1.26298	0.41198	0.388672	0.38882	0.391035	0.428309
	1.29633	0.413931	0.409684	0.39466	0.385947	0.520836
	1.32968	0.432057	0.405686	0.376016	0.42392	0.864119
	1.363	0.471489	0.451696	0.414407	0.541818	1.37197
	1.39635	1.43424	0.649834	0.448931	1.14686	1.48471
	1.42963	1.12526	1.19269	0.772564	0.968916	1.85812
	1.46298	1.13671	1.27878	1.18693	1.01538	1.66323
	1.49633	0.947877	1.23239	0.988155	1.25839	1.52409
	1.52965	0.845963	1.26338	1.17636	1.22019	1.23675
	1.56298	1.29168	1.48963	1.27367	1.20439	0.945992
	1.59633	1.18515	1.24229	1.0585	1.18455	0.942358
	1.62965	1.2833	1.45956	1.24833	1.00034	0.958865
	1.66302	1.48623	1.55108	1.30015	1.33912	1.42817
	1.69632	1.22489	1.21036	1.15759	1.1439	1.07943
	1.72967	1.12021	1.47737	1.7229	1.08389	1.07397
	1.76298	0.875856	1.41916	1.66866	1.05848	1.46496
	1.79632	1.26073	1.44937	1.51921	1.34508	1.26886
	1.82965	1.74165	1.14169	1.24373	1.19397	0.946986
	1.86298	1.52216	1.12444	1.49519	1.13424	0.938971
	1.89635	1.19937	1.20425	1.27136	1.30871	1.1648
	1.92967	1.10784	1.11834	1.44332	1.33731	0.893386
	1.963	1.22555	1.00204	1.38793	1.31261	1.48071
	1.99632	1.18191	1.18567	1.23956	1.10038	1.41728
	2.02967	1.16786	1.08625	1.11696	0.957798	1.30545
	2.063	1.28167	0.90843	1.04656	0.870372	1.21521
	2.09628	1.24488	0.924869	1.11386	0.769567	0.942174
	2.12965	1.09838	0.936526	1.03674	0.697242	1.04264
	2.163	0.992807	0.899271	0.843164	0.638492	1.37012
	2.19633	0.959927	0.745882	1.20702	0.646437	1.13601
	2.22965	0.829905	0.664914	1.09521	0.665638	1.22292
	2.263	0.722907	0.634845	1.19699	0.748772	1.01386
	2.29633	0.793428	0.842684	1.19692	0.671467	0.963896
	2.32963	1.03811	0.992061	1.18232	0.61415	0.908912
	2.36302	0.822979	0.91558	1.07345	0.590857	0.893177
	2.39632	0.704821	0.892434	1.11621	0.523942	1.06656
	2.42967	0.900152	0.871027	1.07387	0.485917	0.85121
	2.46298	0.991662	0.802187	1.04749	0.439664	0.730747
	2.49628	0.795376	0.724024	0.902439	0.445585	0.768786
	2.52965	0.71659	0.662351	0.88899	0.426474	0.971133
	2.563	0.653985	0.642938	0.90831	0.426059	0.871833
	2.59632	0.637074	0.620643	0.787307	0.392806	0.77543
	2.62967	0.581016	0.597899	0.729713	0.415867	0.845965
	2.66302	0.535229	0.620477	0.680902	0.399056	0.761541
	2.69633	0.490302	0.560165	0.81144	0.416365	0.703202
	2.72965	0.483533	0.564609	0.814892	0.396188	0.625415
	2.76298	0.477667	0.598862	0.730191	0.393819	0.716
	2.79632	0.477919	0.665292	0.657204	0.379283	0.894049
	2.82965	0.496219	0.601614	0.607054	0.385978	0.682827
	2.86297	0.504598	0.574153	0.626116	0.407335	0.586749
	2.89633	0.507719	0.603718	0.667966	0.397194	0.551186
	2.92967	0.48688	0.630659	0.85544	0.376927	0.641057
	2.96298	0.526083	0.919047	0.821297	0.392476	0.845678
	2.99633	0.528895	0.810154	0.855169	0.385132	0.705073
	3.02967	0.547121	0.74092	0.888294	0.388887	0.622058
	3.063	0.753257	0.779567	0.871587	0.436301	0.584042
	3.09627	0.760573	0.999449	0.754825	0.425924	0.642446
	3.12965	0.723433	0.871228	0.766129	0.456219	0.707463
	3.163	0.619224	0.733167	0.70392	0.542733	0.612725
	3.1963	0.532722	0.773053	0.663629	0.65174	0.540166
	3.22967	0.514255	0.766452	0.600981	0.620887	0.547201
	3.263	0.49305	0.790844	0.586964	0.591873	0.503346
	3.29632	0.510515	0.756474	0.645757	0.536862	0.593486
	3.32968	0.491751	0.704579	0.718684	0.463536	0.663468
	3.363	0.47612	0.585837	0.730819	0.44108	0.60887
	3.39633	0.474418	0.571279	0.636693	0.440857	0.573429
	3.42962	0.467934	0.733776	0.607727	0.413787	0.513174
	3.463	0.495907	0.805129	0.5579	0.409583	0.461291
	3.49628	0.681076	0.684947	0.50249	0.410412	0.456906
	3.52967	0.910087	0.610288	0.496325	0.395167	0.534229
	3.563	0.752075	0.671394	0.512697	0.376026	0.875666
	3.59633	0.684873	0.706398	0.526504	0.409234	0.702818
	3.62967	0.620763	0.680382	0.540342	0.397845	0.580367
	3.66298	0.606706	0.673566	0.520347	0.388014	0.605982
	3.69632	0.557257	0.996518	0.490034	0.401055	0.699872
	3.72967	0.55842	0.756345	0.488056	0.384953	0.671536
	3.763	0.532171	0.649409	0.47028	0.397488	0.559728
	3.79632	0.507625	0.586672	0.477799	0.3962	0.486425
	3.82967	0.505348	0.604761	0.479899	0.413764	0.460153
	3.863	0.506587	0.580481	0.479845	0.466313	0.441419
	3.8963	0.473966	0.705009	0.454516	0.519745	0.453033
	3.92965	0.472005	0.894513	0.469128	0.574778	0.524093
	3.963	0.484481	0.745729	0.456052	0.530829	0.866655
	3.9963	0.502827	0.881904	0.459739	0.492166	0.632197
	4.02967	0.555556	0.810929	0.460983	0.474799	0.540826
	4.06298	0.610786	0.710965	0.457684	0.445382	0.465601
	4.09632	0.76103	0.716082	0.443876	0.439409	0.469725
	4.12963	0.792637	0.806917	0.441549	0.425501	0.46555
	4.16298	0.688053	0.731691	0.454974	0.406544	0.478324
	4.19635	0.583943	0.631184	0.446794	0.412004	0.459229
	4.22963	0.544397	0.547316	0.486542	0.384697	0.427449
	4.263	0.482705	0.594001	0.554225	0.402118	0.421561
	4.29635	0.498306	0.609326	0.670662	0.402499	0.425685
	4.32965	0.484045	1.10736	0.802447	0.425364	0.438776
	4.36293	0.46034	0.918485	0.758113	0.422574	0.451034
	4.39632	0.447267	0.766556	0.691639	0.421899	0.481549
	4.42963	0.469846	0.839575	0.635695	0.403317	0.478594
	4.46297	0.475361	0.816759	0.566022	0.409362	0.43314
	4.49632	0.479153	0.693295	0.559621	0.38819	0.491702
	4.52967	0.513082	0.624531	0.588426	0.402602	0.502397
	4.563	0.552678	0.695351	0.652427	0.381886	0.599104
	4.5963	0.522319	0.610404	0.627163	0.382214	0.574575
	4.62965	0.49868	0.660694	0.539975	0.387455	0.510067
	4.66298	0.511949	0.77389	0.548918	0.367899	0.465078
	4.69633	0.490505	0.767131	0.510336	0.384517	0.455901
	4.72967	0.476644	0.974125	0.49295	0.436766	0.440225
	4.76302	0.47166	0.793349	0.49414	0.527209	0.427562
	4.79627	0.456593	0.739929	0.492929	0.630086	0.42839
	4.82963	0.466472	0.653352	0.491832	0.635974	0.439907
	4.86302	0.463917	0.736188	0.494372	0.568831	0.43589
	4.89632	0.576894	0.739148	0.479063	0.564691	0.4145
	4.92963	1.03823	0.662377	0.472615	0.491984	0.443865
	4.963	0.819629	0.576759	0.492358	0.550562	0.43445
	4.99633	0.717338	0.537772	0.647332	0.601028	0.468194
	5.02967	0.673929	0.515778	1.04657	0.681769	0.457962
	5.063	0.63875	0.619768	0.838838	0.763437	0.548515
	5.0963	0.70051	0.746871	0.664328	0.603801	0.815515
	5.12967	0.706223	0.702131	0.619064	0.560083	0.74255
	5.16298	0.644246	0.702799	0.582205	0.510236	0.686554
	5.19633	0.552049	0.758357	0.553828	0.474878	0.662192
	5.22965	0.523418	0.817205	0.566499	0.498039	0.56868
	5.26298	0.474276	0.914475	0.583195	0.482784	0.496331
	5.29637	0.474339	0.721315	0.567521	0.451714	0.4512
	5.32967	0.452528	0.731159	0.602451	0.435527	0.456312
	5.363	0.452481	0.734662	0.880232	0.419812	0.471245
	5.3963	0.440744	0.859178	0.858209	0.422032	0.444665
	5.42965	0.430092	0.763037	0.702025	0.397088	0.442402
	5.46298	0.432355	0.855638	0.623984	0.398965	0.426084
	5.49632	0.423459	0.8076	0.565012	0.397603	0.419122
	5.52967	0.429256	0.798981	0.547006	0.374629	0.43035
	5.56298	0.424211	0.707294	0.619367	0.386609	0.447009
	5.59635	0.421981	0.643477	1.12901	0.456623	0.531537
	5.62965	0.439227	0.624917	0.807856	0.545572	0.857446
	5.66297	0.421978	0.792423	0.691711	0.739031	0.72053
	5.69633	0.437537	0.788889	0.623862	0.697467	0.546455
	5.72968	0.42048	0.793463	0.657571	0.610818	0.484236
	5.76297	0.427319	0.800213	0.715584	0.593938	0.460382
	5.79633	0.425368	0.834032	0.770853	0.542092	0.44007
	5.82965	0.431154	0.724601	0.659408	0.470729	0.43454
	5.86298	0.447054	0.653341	0.620174	0.450306	0.492538
	5.89633	0.523574	0.676194	0.609319	0.427533	0.555008
	5.92968	1.10828	0.640041	0.566977	0.406453	0.604624
	5.963	0.810987	0.652444	0.517776	0.389871	0.632987
	5.99632	0.639505	0.727953	0.515049	0.408056	0.528931
	6.02967	0.600072	0.819333	0.567308	0.435987	0.494923
	6.06303	0.549432	0.908847	0.928684	0.471904	0.466709
	6.09632	0.55743	0.781355	0.866292	0.46214	0.454335
	6.12965	0.561705	0.885218	0.729491	0.46879	0.433897
	6.16298	0.517436	0.857242	0.688677	0.446977	0.453511
	6.19633	0.499457	0.849264	0.898861	0.417268	0.44354
	6.22965	0.466965	0.864497	0.926764	0.403444	0.468483
	6.26297	0.447893	0.818076	0.877582	0.401699	0.48209
	6.29633	0.444397	0.7588	0.836695	0.371288	0.63416
	6.32967	0.435268	0.796056	0.871493	0.376267	0.586298
	6.36298	0.460705	0.821753	0.757911	0.378576	0.576052
	6.39633	0.443315	0.809189	0.643673	0.375147	0.613042
	6.42963	0.451435	0.703976	0.61707	0.373681	0.724967
	6.463	0.44022	0.583813	0.565891	0.385559	0.592062
	6.49633	0.428068	0.543069	0.553558	0.37759	0.506818
	6.52965	0.433452	0.630428	0.516084	0.398106	0.48237
	6.56298	0.427826	0.809666	0.537401	0.416409	0.486584
	6.59633	0.411416	0.701797	0.495607	0.403872	0.504345
	6.62967	0.417612	0.745253	0.526873	0.414341	0.452467
	6.66298	0.432435	0.831682	0.497794	0.397741	0.43906
	6.69632	0.427241	0.703904	0.54225	0.472001	0.495799
	6.72963	0.438711	0.729812	0.56473	0.550577	0.551115
	6.76298	0.447184	0.637509	0.551946	0.590919	0.592506
	6.79633	0.427792	0.792583	0.681947	0.811257	0.528868
	6.82967	0.440757	0.796702	0.817278	0.71742	0.513138
	6.86298	0.433786	0.764925	0.747697	0.589194	0.520884
	6.89633	0.43912	0.878527	0.687768	0.512324	0.486366
	6.92965	0.426527	0.931315	0.738641	0.456432	0.486398
	6.963	0.420541	0.939595	0.871724	0.470424	0.563747
	6.9963	0.419638	0.922124	0.855904	0.442439	0.543419
	7.02965	0.423566	0.771951	0.81167	0.432239	0.582371
	7.06298	0.437132	0.927604	0.680976	0.421499	0.6438
	7.09633	0.45317	0.865664	0.63772	0.421272	0.818878
	7.12967	0.453564	0.741047	0.636884	0.417377	0.644446
	7.163	0.461992	0.695933	0.587441	0.450093	0.550094
	7.19633	0.451611	0.673957	0.550749	0.464322	0.468649
	7.22963	0.470336	0.635573	0.571343	0.469557	0.432934
	7.26298	0.502415	0.655724	0.690009	0.59161	0.407721
	7.29633	0.480083	0.929759	0.788396	0.795009	0.422806
	7.32967	0.448239	0.820123	1.03761	0.70219	0.422667
	7.36297	0.447304	0.752984	0.907007	0.720751	0.426322
	7.39633	0.454961	0.722987	0.915001	0.65191	0.455641
	7.42965	0.435622	0.651983	0.75035	0.57949	0.434518
	7.463	0.43343	0.711801	0.663181	0.538766	0.436531
	7.49633	0.396443	0.773105	0.61363	0.544505	0.38979
	7.52965	0.421306	0.759125	0.70385	0.511375	0.404905
	7.56298	0.412176	0.697431	0.723957	0.475089	0.403934
	7.59632	0.408259	0.682005	0.670791	0.410809	0.403492
	7.62967	0.396562	0.62153	0.64532	0.40655	0.417306
	7.663	0.405597	0.601812	0.67148	0.396583	0.391414
	7.69633	0.413288	0.576555	0.676574	0.384867	0.405448
	7.72963	0.420757	0.549459	0.680275	0.381534	0.388401
	7.763	0.43442	0.556086	0.63395	0.386616	0.419072
	7.79627	0.462374	0.736015	0.630696	0.401003	0.39663
	7.8296	0.485585	0.830177	0.589652	0.381955	0.417126
	7.86298	0.482229	0.734362	0.586401	0.382174	0.40473
	7.89635	0.463371	0.665904	0.559206	0.361715	0.434597
	7.9296	0.455207	0.756114	0.589199	0.351943	0.513476
	7.96298	0.486471	0.741693	0.725845	0.365459	0.841391
	7.99627	0.550492	0.802874	0.68736	0.376768	0.71161
	8.02965	0.542405	0.694608	0.608791	0.384363	0.566426
	8.06297	0.505971	0.64059	0.576938	0.384775	0.489731
	8.09625	0.485792	0.653628	0.536779	0.378486	0.480778
	8.12962	0.471083	0.630199	0.577088	0.381343	0.47712
	8.16298	0.433676	0.686231	0.654027	0.43852	0.500617
	8.19627	0.452113	0.680792	0.689202	0.920253	0.514697
	8.22965	0.475029	0.789587	0.639063	0.755432	0.494227
	8.263	0.674043	0.777608	0.644895	0.600463	0.51489
	8.29628	0.85166	0.675206	0.63848	0.551194	0.580419
	8.32968	0.742912	0.577394	0.621968	0.526157	0.696722
	8.36297	0.714431	0.533944	0.661869	0.480715	0.553819
	8.3963	0.762326	0.573738	0.646729	0.432075	0.50326
	8.42962	0.758978	0.618573	0.667785	0.395788	0.476394
	8.46298	0.653341	0.669658	0.701534	0.394442	0.493826
	8.49628	0.629522	0.748582	0.705939	0.38577	0.498148
	8.52968	0.628874	0.637909	0.865591	0.386621	0.641385
	8.56295	0.539914	0.667573	0.759534	0.389768	0.81122
	8.59628	0.502508	0.673852	0.689523	0.392705	0.677855
	8.62963	0.493933	0.659056	0.768268	0.37757	0.727515
	8.663	0.448762	0.822003	0.745681	0.35927	0.671129
	8.6963	0.476707	0.74042	0.739314	0.389865	0.539949
	8.7296	0.47557	0.80576	0.839811	0.396385	0.51757
	8.76295	0.455977	0.818293	0.843576	0.408069	0.474635
	8.79625	0.4551	0.835725	0.735107	0.391511	0.45917
	8.82965	0.507153	0.768634	0.678506	0.381648	0.472876
	8.86298	0.50349	0.777843	0.671199	0.37748	0.47314
	8.89632	0.541623	0.71066	0.716801	0.394869	0.448593
	8.9296	0.511932	0.778444	0.629472	0.391921	0.487772
	8.96293	0.484342	0.708628	0.593321	0.513345	0.542744
	8.99628	0.46084	0.643385	0.58253	1.0222	0.504089
	9.02967	0.452499	0.548544	0.658714	0.840156	0.474026
	9.063	0.433976	0.532902	0.70736	0.724858	0.446598
	9.09632	0.442022	0.578065	0.929032	0.718726	0.430468
	9.1297	0.43962	0.802503	0.767843	0.633605	0.4359
	9.16298	0.443347	0.797698	0.71861	0.56114	0.448887
	9.19633	0.4333	0.688767	0.673804	0.49358	0.524149
	9.22965	0.424668	0.581692	0.626188	0.462608	0.691535
	9.263	0.421378	0.566297	0.61149	0.427315	0.620687
	9.29632	0.412725	0.524736	0.632075	0.412773	0.518658
	9.32967	0.425863	0.701555	0.598869	0.405565	0.477776
	9.363	0.435703	0.718818	0.678252	0.398163	0.484128
	9.3963	0.431208	0.665307	0.612441	0.382787	0.516713
	9.42965	0.433318	0.684173	0.597733	0.384831	0.6149
	9.46302	0.413552	0.667232	0.550501	0.394235	0.630792
	9.49633	0.419961	0.927786	0.526256	0.355006	0.924286
	9.52965	0.412639	0.759928	0.507893	0.387302	0.809246
	9.56298	0.414889	0.652255	0.502348	0.388358	0.627033
	9.59633	0.436525	0.640253	0.498842	0.377198	0.505726
	9.6297	0.450961	0.633135	0.511694	0.375096	0.486225
	9.66305	0.447488	0.707361	0.611897	0.383656	0.459981
	9.69633	0.43948	0.738358	0.605326	0.394092	0.477501
	9.72958	0.444726	0.751691	0.590708	0.388668	0.495134
	9.76293	0.461738	0.764063	0.574577	0.388588	0.628173
	9.79628	0.48549	0.6265	0.576414	0.37482	0.880675
	9.82963	0.578051	0.556257	0.709616	0.384104	0.735359
	9.86297	0.627966	0.530222	0.629466	0.369662	0.619693
	9.89635	0.630478	0.555844	0.63737	0.35591	0.538097
	9.92965	0.566146	0.585527	0.593965	0.378282	0.541374
	9.96298	0.493829	0.586258	0.582779	0.395852	0.495172
	9.99632	0.492827	0.551755	0.550586	0.406137	0.479467
Figure 3I
	Time (Min)
	0	0.376076	0.402953	0.494314	0.386752	0.380063
	0.02965	0.383129	0.393654	0.460453	0.384243	0.378964
	0.063033	0.397429	0.415829	0.437024	0.392657	0.381804
	0.09635	0.384126	0.387294	0.442612	0.381129	0.374275
	0.129683	0.41101	0.417112	0.430761	0.385349	0.383639
	0.163	0.388406	0.416938	0.457351	0.389237	0.376622
	0.196367	0.39074	0.426494	0.464953	0.372786	0.376226
	0.22965	0.398633	0.411831	0.46223	0.411097	0.371163
	0.263017	0.412067	0.442416	0.452872	0.379293	0.381491
	0.296367	0.400847	0.439887	0.455282	0.405135	0.369354
	0.329683	0.389016	0.430995	0.444166	0.396332	0.372074
	0.363	0.381935	0.427559	0.472947	0.384853	0.368933
	0.396333	0.39191	0.416595	0.466914	0.392684	0.362037
	0.429683	0.39812	0.404592	0.441114	0.387034	0.365672
	0.463017	0.387249	0.429136	0.4677	0.405731	0.385042
	0.496367	0.387148	0.410534	0.432671	0.383508	0.381876
	0.529683	0.403909	0.433989	0.474531	0.405814	0.385695
	0.563	0.412262	0.4403	0.465666	0.400321	0.370896
	0.596317	0.386184	0.40339	0.445671	0.390201	0.362081
	0.629667	0.380803	0.428258	0.48132	0.400945	0.376092
	0.66295	0.391815	0.427213	0.452426	0.394289	0.36379
	0.696333	0.385268	0.425059	0.454189	0.381226	0.375003
	0.729633	0.39616	0.446416	0.44641	0.381299	0.374976
	0.762983	0.404771	0.445491	0.443673	0.394605	0.385857
	0.796333	0.400071	0.421811	0.46611	0.387264	0.362682
	0.829667	0.393888	0.457487	0.454737	0.398181	0.381527
	0.863	0.405569	0.420769	0.454205	0.389059	0.377003
	0.896317	0.412493	0.440767	0.449533	0.422262	0.382425
	0.92965	0.397147	0.445021	0.463243	0.395544	0.382946
	0.963033	0.371979	0.403724	0.437947	0.376403	0.384631
	0.996317	0.393283	0.416228	0.452234	0.383895	0.355573
	1.02968	0.396594	0.408336	0.457824	0.392838	0.366563
	1.06302	0.401855	0.398983	0.450309	0.402791	0.405724
	1.09632	0.389081	0.411235	0.44808	0.412653	0.370152
	1.12965	0.38434	0.405533	0.443666	0.398651	0.376125
	1.163	0.390463	0.435893	0.452933	0.407469	0.371276
	1.19632	0.393544	0.449565	0.464582	0.399489	0.376765
	1.22965	0.397543	0.418233	0.528721	0.430621	0.372602
	1.26298	0.412672	0.424166	0.708576	0.529745	0.367446
	1.29633	0.42565	0.427927	1.50271	1.42508	0.379606
	1.32968	0.782749	0.820695	1.35811	1.46638	0.406843
	1.363	1.05252	1.00063	1.69182	1.35511	0.39649
	1.39635	0.846676	0.84538	1.56685	1.35024	0.404761
	1.42963	0.940641	0.966458	1.33914	1.27834	0.418878
	1.46298	1.28217	0.855132	1.01914	1.31014	0.424378
	1.49633	1.23212	0.889269	1.11094	1.51013	0.425532
	1.52965	1.08738	0.971463	1.30023	1.62852	0.506169
	1.56298	1.12462	0.962911	1.03682	1.29859	1.2472
	1.59633	0.960118	0.875355	0.950018	1.33776	0.879363
	1.62965	0.885707	0.912891	1.07427	1.4471	0.689443
	1.66302	0.947369	1.06424	1.1735	1.32544	0.662509
	1.69632	0.89674	1.1478	0.906802	1.36916	0.837659
	1.72967	1.19495	1.0811	0.824074	1.13804	1.19091
	1.76298	1.15939	1.00441	0.941408	1.20265	0.825344
	1.79632	1.10734	1.12441	1.32888	1.20488	0.704271
	1.82965	1.04652	1.0595	1.10951	1.09872	0.820924
	1.86298	1.17979	1.26635	0.885147	0.901464	0.741071
	1.89635	1.06815	1.06679	0.792413	0.8193	0.603366
	1.92967	0.934527	0.999656	0.902676	0.951041	0.931527
	1.963	0.829549	1.12654	0.954222	0.914036	0.999124
	1.99632	0.825319	1.08179	0.865546	0.816549	0.808274
	2.02967	0.787302	0.952336	0.731591	0.712338	0.656691
	2.063	0.756043	0.877766	0.669766	0.648664	0.615787
	2.09628	0.769193	0.85785	0.662017	0.632452	0.6213
	2.12965	0.875481	0.837639	0.634779	0.777283	0.748938
	2.163	0.915381	1.00217	0.605658	0.945652	0.938825
	2.19633	0.774665	0.927613	0.616585	0.810549	0.932891
	2.22965	0.712383	0.750417	0.647858	0.681662	1.00364
	2.263	0.640713	0.753465	0.5947	0.641689	0.872182
	2.29633	0.593101	0.68438	0.579927	0.648155	0.757302
	2.32963	0.54177	0.712595	0.590079	0.796943	0.616112
	2.36302	0.538798	0.604631	0.568823	0.737505	0.564584
	2.39632	0.507719	0.665017	0.522092	0.689661	0.696523
	2.42967	0.505919	0.751261	0.500047	0.591585	0.622182
	2.46298	0.505181	0.684965	0.561677	0.586068	0.723601
	2.49628	0.520125	0.678314	0.539873	0.534282	0.793809
	2.52965	0.528757	0.669563	0.53879	0.62338	0.665779
	2.563	0.474179	0.589399	0.535598	0.620574	0.616775
	2.59632	0.501508	0.538817	0.602409	0.653051	0.568724
	2.62967	0.513342	0.512944	0.52693	0.812824	0.891995
	2.66302	0.541118	0.508489	0.543242	0.939675	0.92331
	2.69633	0.54083	0.491672	0.537386	0.785122	0.703995
	2.72965	0.521569	0.477572	0.51565	0.696368	0.71885
	2.76298	0.488805	0.460887	0.493353	0.584574	0.870088
	2.79632	0.477798	0.477716	0.510834	0.587337	0.726061
	2.82965	0.492668	0.45641	0.466628	0.549176	0.739542
	2.86297	0.505615	0.475627	0.458761	0.527958	0.81491
	2.89633	0.506796	0.514752	0.463187	0.569474	0.92187
	2.92967	0.492624	0.553289	0.451927	0.53532	0.824435
	2.96298	0.496717	0.663974	0.452712	0.506713	0.853419
	2.99633	0.471848	0.611518	0.436795	0.500308	0.60615
	3.02967	0.471251	0.605733	0.448833	0.490131	0.565463
	3.063	0.470548	0.613322	0.451859	0.486115	0.657994
	3.09627	0.450868	0.655959	0.43975	0.468279	0.598841
	3.12965	0.467274	0.612487	0.427661	0.490152	0.563485
	3.163	0.481056	0.532687	0.425945	0.529895	0.54019
	3.1963	0.510224	0.504355	0.456439	0.543402	0.551672
	3.22967	0.566446	0.472045	0.460436	0.518379	0.517358
	3.263	0.749285	0.501676	0.439674	0.502766	0.458489
	3.29632	0.838439	0.583759	0.45906	0.49564	0.457789
	3.32968	0.709905	0.670837	0.439432	0.489725	0.491909
	3.363	0.611384	0.632335	0.451484	0.476805	0.537193
	3.39633	0.558094	0.57367	0.442444	0.499405	0.790565
	3.42962	0.563409	0.51384	0.452364	0.527282	0.635069
	3.463	0.544394	0.484126	0.441241	0.709579	0.534254
	3.49628	0.607325	0.465193	0.448689	0.7123	0.522511
	3.52967	0.597414	0.432301	0.46019	0.719138	0.502064
	3.563	0.614115	0.464434	0.457895	0.996589	0.486027
	3.59633	0.605331	0.500188	0.445183	0.865338	0.477817
	3.62967	0.578391	0.6112	0.446299	0.691469	0.501122
	3.66298	0.549074	0.620741	0.448283	0.645929	0.493863
	3.69632	0.624807	0.583916	0.471978	0.73844	0.586272
	3.72967	0.661082	0.555733	0.49711	0.702871	0.598614
	3.763	0.686058	0.542912	0.878399	0.713779	0.505997
	3.79632	0.826392	0.707949	0.967259	0.701576	0.501874
	3.82967	0.756898	0.773218	0.810354	0.74573	0.448007
	3.863	0.664505	0.773858	0.80517	0.730752	0.468984
	3.8963	0.575289	0.632141	0.917001	0.664648	0.484872
	3.92965	0.546241	0.536712	1.0325	0.615656	0.487335
	3.963	0.56414	0.478978	0.804766	0.574881	0.570308
	3.9963	0.548764	0.466303	0.733668	0.655193	0.598349
	4.02967	0.524877	0.437474	0.740814	0.601599	0.728399
	4.06298	0.499133	0.437318	0.895761	0.537064	0.739584
	4.09632	0.488662	0.43873	0.718314	0.55294	0.586221
	4.12963	0.476217	0.450526	0.610956	0.590181	0.572571
	4.16298	0.487288	0.433114	0.524174	0.656038	0.562443
	4.19635	0.459616	0.455734	0.530547	0.608795	0.706888
	4.22963	0.483407	0.475196	0.531458	0.548028	0.817811
	4.263	0.479453	0.590852	0.516972	0.567037	0.64994
	4.29635	0.52357	0.723011	0.515222	0.549423	0.544241
	4.32965	0.557451	0.726333	0.474551	0.54605	0.468909
	4.36293	0.587661	0.751195	0.459802	0.752742	0.506842
	4.39632	0.604666	0.712454	0.468719	0.944003	0.638142
	4.42963	0.576686	0.591881	0.512158	0.800604	0.643414
	4.46297	0.525711	0.559282	0.568383	1.11574	0.54271
	4.49632	0.516876	0.487424	0.613699	1.01634	0.490916
	4.52967	0.503353	0.462528	0.885242	0.967568	0.487202
	4.563	0.596632	0.450539	0.771758	0.960295	0.465558
	4.5963	0.852371	0.452429	0.628584	1.02188	0.449758
	4.62965	0.744997	0.525663	0.63721	0.966078	0.447933
	4.66298	0.628838	0.898151	0.570173	0.929545	0.421085
	4.69633	0.587291	0.811809	0.529363	0.673402	0.458121
	4.72967	0.596262	0.646599	0.493269	0.569713	0.416773
	4.76302	0.636602	0.597459	0.488637	0.521065	0.401937
	4.79627	0.732956	0.573039	0.510605	0.503607	0.397194
	4.82963	0.726961	0.613894	0.47479	0.492446	0.392981
	4.86302	0.689715	0.664572	0.520259	0.514795	0.388707
	4.89632	0.630254	0.617439	0.485638	0.611637	0.411235
	4.92963	0.601054	0.533953	0.487514	0.842122	0.402435
	4.963	0.568037	0.484289	0.493043	0.72727	0.434881
	4.99633	0.524505	0.438168	0.570867	0.652276	0.494142
	5.02967	0.515703	0.453154	0.685477	0.546371	0.880892
	5.063	0.524756	0.437408	0.80029	0.549352	0.721521
	5.0963	0.545183	0.45677	0.846552	0.563797	0.594417
	5.12967	0.555388	0.454419	0.856492	0.564974	0.579468
	5.16298	0.62324	0.463725	0.736433	0.549384	0.607332
	5.19633	0.62101	0.49847	0.605451	0.516691	0.550927
	5.22965	0.641377	0.503543	0.585914	0.519252	0.467971
	5.26298	0.618148	0.477628	0.550918	0.52519	0.439283
	5.29637	0.590226	0.476758	0.616859	0.564171	0.468102
	5.32967	0.620791	0.465029	0.809492	0.559782	0.589132
	5.363	0.569961	0.455927	0.783097	0.539454	0.924905
	5.3963	0.543059	0.466221	0.665446	0.569243	0.680622
	5.42965	0.50313	0.466164	0.604778	0.598783	0.557769
	5.46298	0.513133	0.543187	0.561567	0.534117	0.485665
	5.49632	0.594665	0.623213	0.548625	0.681189	0.458798
	5.52967	0.798303	0.590042	0.537859	0.746633	0.431816
	5.56298	0.792285	0.531823	0.612821	0.704015	0.396557
	5.59635	0.667089	0.591843	0.92927	0.815553	0.397003
	5.62965	0.600174	0.588214	0.910063	0.949411	0.395363
	5.66297	0.525453	0.576632	0.83245	0.88732	0.409642
	5.69633	0.523716	0.532093	0.852711	0.725316	0.407161
	5.72968	0.519286	0.545738	0.814704	0.707129	0.396602
	5.76297	0.49925	0.587584	0.673855	0.645336	0.417288
	5.79633	0.500498	0.53271	0.624581	0.654612	0.455963
	5.82965	0.506586	0.502293	0.683757	0.649478	0.469512
	5.86298	0.510028	0.499199	0.943434	0.648154	0.47172
	5.89633	0.519575	0.464815	0.853562	0.670691	0.465589
	5.92968	0.780285	0.472565	0.744011	0.647511	0.414987
	5.963	0.753635	0.515451	0.608484	0.610916	0.414348
	5.99632	0.679434	0.637736	0.527544	0.594144	0.391951
	6.02967	0.671287	0.669825	0.50999	0.537699	0.388657
	6.06303	0.559886	0.62588	0.476943	0.533004	0.380853
	6.09632	0.58188	0.629204	0.516589	0.621355	0.363925
	6.12965	0.58248	0.580256	0.567179	0.626624	0.387057
	6.16298	0.596658	0.547345	0.649561	0.6808	0.389189
	6.19633	0.515327	0.498078	0.756786	0.674598	0.380755
	6.22965	0.555099	0.511168	0.889851	0.66327	0.381193
	6.26297	0.651662	0.459519	0.853754	0.891199	0.400301
	6.29633	0.631889	0.44519	0.856548	0.846094	0.454449
	6.32967	0.580184	0.448548	0.815698	0.994717	0.462723
	6.36298	0.564012	0.465284	0.755944	0.887325	0.454712
	6.39633	0.58749	0.592962	0.712848	0.909415	0.474729
	6.42963	0.62009	0.73702	0.70991	0.79757	0.500186
	6.463	0.707308	0.639246	0.767359	0.734792	0.513105
	6.49633	0.773384	0.59423	0.690103	0.910133	0.48894
	6.52965	0.741918	0.532659	0.587688	0.75032	0.510082
	6.56298	0.648305	0.536465	0.537936	0.705084	0.493522
	6.59633	0.580437	0.558497	0.486117	0.779329	0.45588
	6.62967	0.612642	0.798906	0.478005	0.838723	0.42466
	6.66298	0.617356	0.707861	0.530149	0.696875	0.425248
	6.69632	0.601849	0.5892	0.523208	0.820317	0.485257
	6.72963	0.571165	0.517961	0.545868	0.846677	0.467425
	6.76298	0.567437	0.489863	0.557037	0.730929	0.490546
	6.79633	0.605681	0.469078	0.580959	0.704309	0.471565
	6.82967	0.668604	0.496	0.555492	0.783303	0.444242
	6.86298	0.787301	0.491111	0.558594	0.761222	0.463365
	6.89633	0.755026	0.673204	0.56793	0.761429	0.44121
	6.92965	0.737303	0.620602	0.819875	0.642007	0.43198
	6.963	0.752546	0.66164	0.854469	0.620779	0.410186
	6.9963	0.742789	0.613351	0.714752	0.644489	0.403343
	7.02965	0.666753	0.574603	0.731763	0.609782	0.409598
	7.06298	0.595503	0.662686	0.743507	0.519586	0.387506
	7.09633	0.558175	0.662222	0.652509	0.504734	0.396379
	7.12967	0.599443	0.603342	0.5901	0.526052	0.404345
	7.163	0.540382	0.532468	0.588336	0.513283	0.409475
	7.19633	0.511505	0.488295	0.58299	0.660489	0.40065
	7.22963	0.546038	0.437647	0.659791	0.886961	0.418777
	7.26298	0.557847	0.464091	0.75134	0.752365	0.472406
	7.29633	0.554867	0.485464	1.09875	0.780515	0.516993
	7.32967	0.496128	0.450495	0.96311	0.952663	0.51264
	7.36297	0.506323	0.465976	0.816538	0.817659	0.434937
	7.39633	0.494691	0.690078	0.78147	0.786107	0.425381
	7.42965	0.510751	0.792057	0.715696	0.753766	0.39588
	7.463	0.543698	0.656577	0.682421	0.826654	0.417711
	7.49633	0.570481	0.607886	0.649242	0.702091	0.407783
	7.52965	0.545639	0.557969	0.567107	0.660074	0.366957
	7.56298	0.544598	0.545207	0.572625	0.643409	0.380639
	7.59632	0.566026	0.511023	0.534239	0.568369	0.394109
	7.62967	0.601242	0.511626	0.509272	0.541865	0.374432
	7.663	0.552438	0.461373	0.503503	0.527806	0.366367
	7.69633	0.545165	0.47662	0.543549	0.640803	0.379264
	7.72963	0.642996	0.518191	0.648895	0.73209	0.362266
	7.763	0.893549	0.493865	0.749342	0.644465	0.394249
	7.79627	0.714296	0.510742	0.681911	0.651104	0.37838
	7.8296	0.629277	0.580672	0.695638	0.66849	0.369294
	7.86298	0.536906	0.549992	0.71113	0.617018	0.396116
	7.89635	0.496158	0.533429	0.728664	0.607256	0.414543
	7.9296	0.483135	0.556044	0.789701	0.589926	0.408845
	7.96298	0.467777	0.481949	0.666171	0.639597	0.393092
	7.99627	0.489215	0.489291	0.591257	0.684179	0.393206
	8.02965	0.517927	0.468671	0.534296	0.593657	0.389723
	8.06297	0.638342	0.454361	0.481499	0.551375	0.391653
	8.09625	0.772117	0.444261	0.468287	0.554204	0.406129
	8.12962	0.761199	0.476947	0.448772	0.610858	0.403291
	8.16298	0.715666	0.479842	0.445364	0.650663	0.422544
	8.19627	0.664865	0.708989	0.451107	0.788729	0.462377
	8.22965	0.620152	0.813925	0.466335	0.760408	0.573912
	8.263	0.653077	0.791792	0.457894	0.819353	0.646665
	8.29628	0.610688	0.600269	0.461481	0.761801	0.602761
	8.32968	0.55408	0.548618	0.478022	0.610779	0.478654
	8.36297	0.535029	0.481766	0.47191	0.582618	0.442768
	8.3963	0.503315	0.446963	0.515342	0.511654	0.410358
	8.42962	0.536461	0.471882	0.631947	0.527638	0.384922
	8.46298	0.527932	0.463983	0.928716	0.725618	0.389524
	8.49628	0.488351	0.446443	0.802151	0.796785	0.390698
	8.52968	0.449452	0.46686	0.632029	0.733556	0.376722
	8.56295	0.47896	0.438212	0.574313	0.707132	0.391115
	8.59628	0.499542	0.448336	0.53687	0.894483	0.37324
	8.62963	0.654217	0.445184	0.548581	0.701189	0.41476
	8.663	0.820322	0.442723	0.576857	0.81474	0.395775
	8.6963	0.709668	0.439493	1.03699	0.832033	0.409379
	8.7296	0.586455	0.445879	0.919838	0.940389	0.434577
	8.76295	0.555856	0.447518	0.7496	0.949638	0.418245
	8.79625	0.569938	0.425921	0.716884	0.831599	0.389945
	8.82965	0.701298	0.424258	0.796217	0.733296	0.383922
	8.86298	0.620356	0.45834	0.801656	1.04064	0.378423
	8.89632	0.594719	0.448388	0.648944	0.86463	0.384563
	8.9296	0.553234	0.467611	0.586477	0.8549	0.371603
	8.96293	0.505403	0.423189	0.587154	0.918823	0.387591
	8.99628	0.484643	0.420239	0.543938	0.871678	0.395523
	9.02967	0.449765	0.417006	0.51261	0.800774	0.394094
	9.063	0.496482	0.472809	0.504465	0.829637	0.380066
	9.09632	0.521217	0.428423	0.455082	0.804097	0.385144
	9.1297	0.533146	0.452695	0.453771	0.762942	0.378555
	9.16298	0.540311	0.473203	0.460855	0.64415	0.39436
	9.19633	0.474725	0.4957	0.45323	0.605214	0.390377
	9.22965	0.490874	0.521105	0.488594	0.623141	0.396776
	9.263	0.537362	0.568729	0.740952	0.626083	0.389378
	9.29632	0.571358	0.659332	1.19639	0.6674	0.386682
	9.32967	0.573693	0.659734	0.816739	0.609321	0.380196
	9.363	0.600909	0.599921	0.649258	0.586307	0.401048
	9.3963	0.574266	0.620571	0.579637	0.640904	0.369659
	9.42965	0.56574	0.770759	0.514553	0.670975	0.389781
	9.46302	0.570724	0.606578	0.493035	0.631089	0.386074
	9.49633	0.554898	0.535249	0.509805	0.809149	0.386584
	9.52965	0.51239	0.47764	0.499242	0.8095	0.396363
	9.56298	0.499948	0.467471	0.497888	0.718869	0.380463
	9.59633	0.493779	0.464155	0.478374	0.660588	0.402767
	9.6297	0.522897	0.464449	0.463294	0.667737	0.383975
	9.66305	0.714664	0.448542	0.604176	0.64588	0.38706
	9.69633	0.661722	0.45801	0.711074	0.642575	0.384772
	9.72958	0.633743	0.436563	0.652897	0.720478	0.381317
	9.76293	0.61612	0.454915	0.579209	0.674552	0.379018
	9.79628	0.597872	0.47495	0.586417	0.557493	0.394005
	9.82963	0.537747	0.502687	0.647552	0.536747	0.423605
	9.86297	0.492246	0.495402	0.861572	0.585431	0.426736
	9.89635	0.468103	0.485268	0.776433	0.870775	0.421787
	9.92965	0.457904	0.491586	0.640055	0.781233	0.389537
	9.96298	0.465588	0.443946	0.605303	0.755999	0.386673
	9.99632	0.472563	0.428778	0.60736	0.857351	0.397761
Figure 3J
	Mb1cre/+	Orai1fl/flMb1cre/+
	10	12
	14	12
	18	14
	14	7
	7	12
	10	14
	12	14
	18	4
	15	9
	17	10
	15	8
	7	9
	8	15
	15	19
	5	12
	15	7
	17	11
	15	10
	19	12
	16	10
	14	16
	12	4
	6	15
	17	4
	11	9
	15	19
	15	13
	12	20
	7	12
	11	4
	16	19
	14	10
	13	16
	14	12
	17	11
	17	15
	17	10
	12	15
	14	14
	13	8
	17	14
	17	9
	10	8
	14	17
	7	9
	18	13
	11	2
	13	19
	5	10
	10	5
	12	14
	12	6
	5	14
	5	7
	10	14
	13	8
	17	12
	10	9
	4	11
	4	17
	13	10
	5	17
	11	15
	11	19
	14	6
	6	5
	17	5
	12	8
	9	13
	8	16
	11	14
	13	8
	2	16
	13	11
	11	13
	13	14
	10	6
	14	11
	7	8
	13	9
	16	15
	13	7
	15	7
	10	15
	11	10
	9	7
	14	5
	8	6
	7	12
	9	12
	9	9
	17	5
	13	4
	5	8
	16	13
	7	6
	7	6
		15
		17
		6
		10
		8
		10
		5
		11
		13
		9
		17
		14
		12
		6
[truncated: 301 more columns]
