# Supplementary material for: Orai3 and Orai1 mediate CRAC channel function and metabolic reprogramming in B cells
Source: eLife. 2023 Feb 21;12:e84708. doi: 10.7554/eLife.84708 (PMC9998091; doi:10.7554/eLife.84708)
Supplement: Figure 4—source data 1. [file elife-84708-fig4-data1.xlsx]

## Sheet: Sheet1
Figure 4C
	A			B			C			D			E			F
	Mb1cre/+	Orai1fl/flMb1cre/+		Mb1cre/+	Orai1fl/flMb1cre/+		Mb1cre/+	Orai1fl/flMb1cre/+		Mb1cre/+	Orai1fl/flMb1cre/+		Mb1cre/+	Orai1fl/flMb1cre/+		Mb1cre/+	Orai1fl/flMb1cre/+
	27.8	41.5		63.8	45.8		6.14	8.03		42.2	45.4		9.96	10.7		26.4	22.7
	34.6	38.3		59	50.6		3.99	7.81		26.4	56.1		12	13.3		35.1	15.2
	31.3	38.2		57.1	51		9.59	7.29		47.9	37.8		9.22	9.55		22.7	27.4
	32	34		53.5	53.3		13.3	8.89		61.9	38.1		9.84	8.34		16.1	27.4
	31	31.4		52.3	61.2		14.2	9.58		55.3	55.5		10	12.4		20.3	18.5
	37.2	34		46	50.9		11.7	11.2		61.8	54.2		11.7	13.4		14.6	18.4
	35.6			50.4			11.6			61.3			12.5			15.1
Figure 4F
	T1			T2			T3			MZ			FO
	Mb1cre/+	Orai1fl/flMb1cre/+		Mb1cre/+	Orai1fl/flMb1cre/+		Mb1cre/+	Orai1fl/flMb1cre/+		Mb1cre/+	Orai1fl/flMb1cre/+		Mb1cre/+	Orai1fl/flMb1cre/+
	14.6	15.6		66.7	67.3		14.9	14		11.5	13.3		85.7	83.2
	15.8	18.4		62.5	59.7		14.8	16.8		15.7	15.1		80.3	81.1
	17.8	14.2		63.3	67		15	15.4		15	11.9		81.6	85.3
	15.9	15.5		64.9	65.6		15.2	15.4		11.5	12.1		85.7	84.9
	13.4	18.7		65	43.5		18.4	16.4		15.7	12.1		80.3	84.9
	17.5	22.6		55.8	41.4		21.1	18.4		15	15.1		81.6	81.1
	21.5			49.1			20			13.3			83.2
