# Supplementary material for: Orai3 and Orai1 mediate CRAC channel function and metabolic reprogramming in B cells
Source: eLife. 2023 Feb 21;12:e84708. doi: 10.7554/eLife.84708 (PMC9998091; doi:10.7554/eLife.84708)
Supplement: Figure 5—figure supplement 1—source data 1. [file elife-84708-fig5-figsupp1-data1.xlsx]

## Sheet: Sheet1
Figure 5 - Figure Supplement 1A
	Time (min)	Mb1cre/+
	0	0.414043	0.528175	0.644717	1.04924	0.824913	0.387813	0.406304	0.486779	0.422125	0.459057	0.405086	0.446026	0.46864	0.456891	0.40428	0.703426	0.358528	0.406551	0.365229	0.446742	0.366053	0.38131	0.431373	0.491808	0.394361	0.38365	0.395762	0.548468	0.494786	0.587202	0.382925	0.41698	0.428771	0.507653	0.601408	0.402076	0.372442	0.472037	0.566231	1.0025	0.506952	0.400646	0.374834	0.490139	0.387358	0.397147	0.344259	0.667253
	0.029583	0.418682	0.581205	1.06065	0.961928	0.928465	0.399658	0.411127	0.498176	0.430853	0.478534	0.401856	0.436841	0.468986	0.441476	0.413755	0.723267	0.364516	0.417664	0.390132	0.467182	0.371086	0.37915	0.459277	0.505121	0.394255	0.372363	0.397007	0.503715	0.455084	0.597965	0.388221	0.418221	0.433869	0.502357	0.692274	0.379692	0.371247	0.479812	0.549495	0.96529	0.546567	0.396538	0.381935	0.469098	0.387955	0.389275	0.347147	0.911116
	0.062933	0.427877	0.655711	1.17627	0.88475	0.883267	0.376977	0.434789	0.486975	0.470981	0.445219	0.400197	0.434725	0.457502	0.443929	0.411006	0.732749	0.35945	0.412163	0.361131	0.453671	0.371225	0.392067	0.445268	0.498317	0.408378	0.381753	0.390472	0.488843	0.432367	0.615214	0.393502	0.415833	0.425975	0.500036	0.805367	0.39974	0.37433	0.501271	0.555417	0.906123	0.494162	0.404149	0.382644	0.459018	0.393458	0.389915	0.349103	0.876991
	0.096283	0.425945	0.663519	1.12339	0.751436	0.784802	0.389582	0.44394	0.498293	0.521734	0.47478	0.405418	0.440232	0.46513	0.435449	0.408786	0.749271	0.347582	0.409114	0.37025	0.449487	0.379172	0.386113	0.471229	0.488977	0.42019	0.373285	0.380047	0.476714	0.419994	0.614559	0.395778	0.406467	0.433592	0.504378	0.765423	0.399236	0.377576	0.498322	0.556167	0.810963	0.521997	0.402324	0.390539	0.457956	0.392633	0.385571	0.3504	0.742056
	0.129667	0.41994	0.688058	1.00541	0.637805	0.695021	0.377226	0.481793	0.486433	0.571909	0.485233	0.403009	0.453966	0.455907	0.438596	0.407086	0.724336	0.351271	0.407588	0.355983	0.43414	0.37977	0.385446	0.472295	0.499026	0.389122	0.368938	0.390742	0.45759	0.394917	0.639976	0.382295	0.407296	0.427826	0.506027	0.682881	0.410419	0.354769	0.490141	0.535352	0.76485	0.516038	0.394614	0.384933	0.454065	0.405398	0.391847	0.342119	0.646236
	0.163	0.426452	0.714513	0.893174	0.548533	0.609814	0.40225	0.512352	0.483435	0.683608	0.480132	0.407837	0.438485	0.46868	0.430984	0.411347	0.734344	0.351655	0.414241	0.343031	0.439623	0.383395	0.375849	0.544225	0.485179	0.417867	0.375973	0.394392	0.439712	0.400198	0.576703	0.381169	0.413345	0.454522	0.514081	0.571625	0.398053	0.367695	0.501153	0.548978	0.727471	0.543449	0.398362	0.387034	0.46461	0.407899	0.39268	0.355092	0.593457
	0.1963	0.421067	0.673654	0.771902	0.490053	0.523524	0.390602	0.569186	0.474586	0.751932	0.467517	0.404631	0.435178	0.438767	0.43493	0.417596	0.821981	0.345054	0.417651	0.371011	0.44218	0.370959	0.370417	0.764048	0.501585	0.407313	0.375674	0.384317	0.435181	0.377904	0.53023	0.385441	0.413122	0.472877	0.494334	0.522527	0.398598	0.376143	0.484615	0.543004	0.739454	0.517652	0.3881	0.373267	0.498177	0.422545	0.393834	0.348491	0.551316
	0.229683	0.42044	0.60518	0.694543	0.437817	0.497106	0.384239	0.709764	0.49423	0.798786	0.491067	0.403071	0.44323	0.453414	0.414634	0.407122	1.00245	0.350393	0.404039	0.367681	0.435242	0.3742	0.382447	0.973205	0.493868	0.40517	0.375228	0.396415	0.430695	0.376596	0.474734	0.377303	0.402149	0.50011	0.513675	0.464235	0.391437	0.361504	0.47789	0.546577	0.863997	0.552987	0.39257	0.385981	0.636238	0.401945	0.391814	0.374979	0.517184
	0.262983	0.414996	0.588251	0.619553	0.422196	0.458672	0.395286	0.8219	0.501359	0.781016	0.478614	0.408787	0.450668	0.457275	0.430999	0.410867	1.13497	0.350654	0.405971	0.358375	0.455573	0.370728	0.384476	0.925756	0.480474	0.396396	0.370573	0.391039	0.440492	0.365435	0.449476	0.367591	0.397081	0.52636	0.501073	0.439035	0.390998	0.3702	0.479874	0.534208	0.995453	0.583933	0.391747	0.39578	0.815238	0.404908	0.376048	0.378062	0.499309
	0.29635	0.414998	0.565173	0.56967	0.39052	0.435839	0.395155	0.770187	0.485695	0.73158	0.493802	0.405437	0.45074	0.473533	0.420825	0.406786	1.11633	0.348276	0.392943	0.367961	0.458186	0.37198	0.393619	0.798258	0.497186	0.399377	0.375384	0.38774	0.441969	0.367653	0.462259	0.383849	0.414776	0.563272	0.504531	0.429616	0.413356	0.37322	0.48255	0.542082	1.06621	0.61316	0.399763	0.413765	0.759166	0.407784	0.383952	0.407848	0.479479
	0.329633	0.408426	0.55183	0.539025	0.384625	0.417485	0.387446	0.687616	0.474892	0.645156	0.476881	0.390108	0.442414	0.459315	0.419662	0.404158	1.09778	0.346087	0.391305	0.362594	0.444224	0.376873	0.393572	0.643417	0.468564	0.39043	0.372143	0.382788	0.443405	0.361973	0.440778	0.375464	0.43401	0.619959	0.504489	0.401992	0.380433	0.367213	0.461009	0.523256	1.01652	0.613018	0.3926	0.407374	0.64657	0.395759	0.389233	0.442656	0.469736
	0.362967	0.426427	0.554811	0.509269	0.371628	0.410588	0.392141	0.637592	0.47701	0.575954	0.514969	0.406074	0.446459	0.466172	0.421142	0.416966	1.02217	0.355329	0.40275	0.368699	0.429629	0.38492	0.395388	0.551084	0.493977	0.389511	0.369451	0.387742	0.466907	0.3651	0.456341	0.363977	0.442875	0.677152	0.509002	0.391015	0.400848	0.36559	0.45245	0.526318	1.00703	0.604966	0.395816	0.419886	0.547288	0.40859	0.38844	0.553503	0.448048
	0.396317	0.430529	0.54685	0.482009	0.382071	0.399184	0.414656	0.56537	0.459608	0.529834	0.532878	0.398503	0.443742	0.483578	0.420273	0.411626	0.962299	0.345863	0.403039	0.378709	0.45976	0.379417	0.397147	0.479708	0.499267	0.387023	0.379918	0.373688	0.541868	0.356669	0.49542	0.372242	0.481245	0.733885	0.490703	0.37939	0.389007	0.374263	0.447488	0.527821	0.975871	0.627309	0.395631	0.420508	0.503834	0.39081	0.387381	0.80346	0.460068
	0.429633	0.423995	0.546027	0.464487	0.372383	0.403162	0.402308	0.532779	0.455899	0.489842	0.570558	0.39868	0.433482	0.446927	0.419091	0.40771	0.910203	0.33977	0.392815	0.354582	0.447773	0.368865	0.402693	0.428882	0.478788	0.402805	0.376121	0.395418	0.69604	0.359343	0.532278	0.376647	0.495558	0.701938	0.494423	0.383748	0.385985	0.357948	0.423176	0.53128	0.969917	0.59264	0.38867	0.431017	0.47784	0.387308	0.382725	0.781105	0.46392
	0.463	0.447961	0.497347	0.454346	0.379884	0.394584	0.398542	0.522432	0.4591	0.463629	0.616139	0.393395	0.444656	0.455663	0.429018	0.41221	0.832891	0.346047	0.393206	0.357879	0.460132	0.387488	0.404286	0.392984	0.472343	0.396543	0.378242	0.394415	0.808743	0.349305	0.59397	0.363147	0.520801	0.712059	0.488931	0.380534	0.408271	0.370748	0.439805	0.523486	0.974257	0.567961	0.395705	0.44769	0.434544	0.396541	0.391279	0.6725	0.483982
	0.496317	0.448489	0.46761	0.439836	0.383079	0.405702	0.396603	0.512295	0.455755	0.43609	0.645908	0.401395	0.450665	0.455642	0.426214	0.40448	0.757458	0.349479	0.400103	0.363452	0.444013	0.374835	0.421247	0.389564	0.49049	0.401352	0.365535	0.397319	0.827796	0.364407	0.632707	0.364647	0.563683	0.669173	0.490491	0.384885	0.385697	0.370216	0.427544	0.527874	1.05353	0.562255	0.395091	0.468537	0.445513	0.391673	0.386185	0.630586	0.540292
	0.529633	0.464662	0.44756	0.429499	0.382354	0.395484	0.398331	0.481775	0.450698	0.42565	0.663478	0.405424	0.443664	0.46686	0.440906	0.404948	0.703871	0.33971	0.383278	0.371142	0.431842	0.373886	0.427089	0.382491	0.461496	0.384679	0.362342	0.382613	0.778361	0.358683	0.671531	0.372305	0.581243	0.623366	0.49627	0.385272	0.371513	0.35616	0.445611	0.516559	1.01143	0.554969	0.385501	0.485913	0.433755	0.38516	0.391528	0.581337	0.865618
	0.56295	0.476147	0.430362	0.424379	0.39166	0.409402	0.418475	0.482201	0.472008	0.420759	0.694165	0.401092	0.4422	0.464696	0.430373	0.410375	0.648472	0.357306	0.393417	0.376409	0.429381	0.391908	0.435937	0.373485	0.473733	0.391523	0.376919	0.39869	0.715948	0.375507	0.690974	0.37145	0.638576	0.643893	0.49319	0.387346	0.389912	0.366637	0.465789	0.514869	0.95059	0.563811	0.394488	0.521506	0.491541	0.390186	0.401593	0.539792	1.03177
	0.5963	0.483455	0.426831	0.433569	0.388965	0.407284	0.406634	0.449745	0.458875	0.405773	0.665855	0.392736	0.449705	0.461031	0.439356	0.405135	0.629284	0.352587	0.393889	0.357838	0.433807	0.381551	0.452729	0.366772	0.461091	0.402909	0.369485	0.393206	0.659927	0.3766	0.638008	0.381916	0.674955	0.652134	0.501535	0.382708	0.389253	0.36242	0.46451	0.524765	0.896116	0.547968	0.385499	0.61248	0.74247	0.386506	0.393751	0.511006	0.988554
	0.629633	0.493414	0.418637	0.42306	0.393571	0.400625	0.42843	0.443085	0.467071	0.400686	0.633353	0.394324	0.467047	0.458423	0.426005	0.395444	0.599872	0.352317	0.398288	0.368567	0.423817	0.376894	0.452376	0.374398	0.483053	0.399327	0.383234	0.39937	0.620791	0.354432	0.598633	0.373452	0.6541	0.692733	0.494407	0.414676	0.37774	0.385713	0.51444	0.512371	0.852229	0.566237	0.399299	0.758187	1.03057	0.392187	0.394812	0.478147	0.896214
	0.66295	0.490766	0.420107	0.426413	0.397074	0.390973	0.479202	0.445932	0.457088	0.399757	0.662518	0.399096	0.45939	0.457472	0.432125	0.403728	0.581005	0.343769	0.397463	0.359436	0.440847	0.3792	0.454042	0.387075	0.457768	0.399017	0.370051	0.391016	0.57641	0.381996	0.583441	0.37705	0.600042	0.718139	0.50412	0.443778	0.391298	0.367539	0.521282	0.51172	0.882478	0.588601	0.399669	0.755249	1.03363	0.377877	0.385982	0.437021	0.784952
	0.696283	0.498525	0.422778	0.425439	0.398921	0.388582	0.486958	0.436675	0.448106	0.405516	0.708772	0.395846	0.465859	0.475468	0.426456	0.395357	0.564628	0.354942	0.398493	0.374654	0.429534	0.37774	0.477534	0.36946	0.464558	0.40327	0.370965	0.397633	0.552162	0.373632	0.578478	0.388422	0.535886	0.763833	0.48981	0.4551	0.383884	0.366671	0.53307	0.51273	0.87139	0.572527	0.403904	0.693306	0.982308	0.384306	0.387664	0.424834	0.693972
	0.729617	0.503135	0.417291	0.418104	0.409988	0.404721	0.480586	0.422646	0.448898	0.389393	0.695086	0.399093	0.460967	0.459504	0.438986	0.403183	0.547213	0.343104	0.391716	0.363692	0.4554	0.372888	0.513775	0.351254	0.464747	0.388809	0.362448	0.393571	0.553987	0.379792	0.575832	0.387062	0.505748	0.737266	0.500415	0.494388	0.385319	0.35444	0.491502	0.509276	0.80973	0.605878	0.392908	0.603965	0.878261	0.387588	0.390347	0.399363	0.632862
	0.762967	0.631127	0.415962	0.427926	0.431523	0.39589	0.529759	0.407513	0.477646	0.387569	0.767844	0.394902	0.457785	0.483182	0.436922	0.390801	0.526784	0.347445	0.403237	0.374996	0.452216	0.371228	0.577151	0.375454	0.465398	0.391046	0.371216	0.385417	0.518314	0.371722	0.598878	0.377359	0.473384	0.659244	0.486663	0.589891	0.397462	0.395848	0.465107	0.520368	0.759504	0.568456	0.386632	0.526499	0.752738	0.378484	0.39377	0.380755	0.603477
	0.7963	1.03679	0.426098	0.428913	0.442353	0.406297	0.605023	0.417967	0.466958	0.400009	0.82508	0.406343	0.472597	0.455385	0.442498	0.389329	0.528992	0.350548	0.389847	0.375892	0.452513	0.377791	0.570488	0.374373	0.457155	0.378877	0.376544	0.392646	0.494304	0.377753	0.555172	0.388054	0.433424	0.601049	0.487549	0.800828	0.395983	0.370797	0.457865	0.541639	0.752051	0.562666	0.404201	0.476878	0.65581	0.388191	0.419023	0.387233	0.57571
	0.829633	1.19172	0.44628	0.414302	0.464531	0.40091	0.63615	0.414501	0.487833	0.396695	0.840146	0.392208	0.471465	0.457076	0.444551	0.379599	0.531126	0.349873	0.38621	0.382396	0.456114	0.378762	0.548699	0.37208	0.453862	0.404302	0.383137	0.393903	0.464266	0.366841	0.471	0.378254	0.416502	0.582929	0.484552	0.884567	0.399966	0.36367	0.476288	0.53922	0.652015	0.571733	0.40544	0.444358	0.581116	0.402362	0.398891	0.37772	0.596236
	0.8629	1.23348	0.465532	0.434209	0.517484	0.443129	0.67429	0.42322	0.512862	0.416249	0.901883	0.402801	0.469562	0.46733	0.461341	0.391637	0.52231	0.348772	0.403625	0.363388	0.444336	0.380756	0.558134	0.375793	0.442597	0.405893	0.377713	0.391714	0.451733	0.367678	0.44759	0.389711	0.417259	0.622682	0.488508	0.814631	0.394322	0.379646	0.473857	0.548948	0.640974	0.554082	0.411915	0.440307	0.529452	0.39634	0.403016	0.366071	0.574859
	0.8963	1.02341	0.475075	0.419834	0.53985	0.448165	0.647383	0.408986	0.565968	0.421702	0.795489	0.399527	0.459874	0.468281	0.458822	0.401793	0.520596	0.34956	0.388863	0.370881	0.439767	0.373205	0.550744	0.406325	0.451105	0.399263	0.382419	0.387986	0.449452	0.368778	0.476349	0.376842	0.421008	0.63186	0.499381	0.768647	0.411779	0.368859	0.462246	0.574217	0.581667	0.434847	0.411427	0.416476	0.447111	0.39379	0.412803	0.375837	0.563722
	0.9296	0.871337	0.433599	0.382797	0.526566	0.438083	0.630818	0.394847	0.555499	0.38298	0.684762	0.381881	0.442742	0.446856	0.436995	0.397007	0.48298	0.341034	0.367049	0.353177	0.435385	0.358542	0.506447	0.381736	0.402792	0.379798	0.348377	0.246415	0.362459	0.354204	0.421705	0.358206	0.341646	0.624849	0.451032	0.698158	0.372134	0.34432	0.421228	0.562429	0.53475	0.398335	0.379255	0.395381	0.423658	0.381517	0.376728	0.343986	0.539437
	0.962933	0.801147	0.486014	0.400295	0.527028	0.454892	0.570748	0.383076	0.599412	0.375902	0.651051	0.380018	0.436825	0.449651	0.43093	0.37213	0.471126	0.330207	0.357369	0.360466	0.398966	0.362031	0.461007	0.387617	0.427175	0.368808	0.35456	0.370804	0.402208	0.360677	0.472661	0.350235	0.364185	0.601192	0.464698	0.657742	0.380435	0.344764	0.411752	0.553844	0.538338	0.481587	0.370239	0.378268	0.403086	0.382707	0.386844	0.346301	0.53924
	0.996283	0.675226	0.522614	0.393982	0.56864	0.462955	0.513813	0.367206	0.648398	0.373121	0.571105	0.383872	0.452566	0.422457	0.438067	0.377489	0.469526	0.335015	0.375645	0.360015	0.353595	0.356741	0.459182	0.405995	0.406364	0.390293	0.344592	0.365537	0.394429	0.347793	0.562159	0.360542	0.35634	0.577407	0.409035	0.594215	0.349452	0.335649	0.41327	0.544156	0.499555	0.479865	0.372883	0.367311	0.379154	0.376321	0.378496	0.348705	0.544209
	1.02962	0.579616	0.53311	0.398539	0.538342	0.450321	0.45569	0.373823	0.67765	0.374068	0.559864	0.393143	0.441103	0.433952	0.426312	0.386956	0.466317	0.342908	0.373268	0.357119	0.423047	0.366854	0.451676	0.408172	0.40863	0.389068	0.352419	0.358855	0.383263	0.349938	0.617511	0.363959	0.376639	0.564627	0.442199	0.547011	0.367565	0.343453	0.389081	0.542558	0.494334	0.466139	0.375905	0.371072	0.378062	0.399892	0.382675	0.3452	0.564841
	1.06297	0.499754	0.534766	0.395197	0.47916	0.484308	0.42899	0.363043	0.660074	0.363183	0.506897	0.39047	0.434405	0.423108	0.427724	0.362487	0.445244	0.345408	0.371095	0.361496	0.415217	0.366963	0.427423	0.394658	0.402263	0.393777	0.337919	0.365689	0.365472	0.355752	0.669122	0.361142	0.364936	0.555088	0.444508	0.505971	0.382193	0.353234	0.390916	0.549166	0.447243	0.439459	0.373766	0.363769	0.377479	0.395728	0.385676	0.34486	0.580114
	1.09628	0.457538	0.538422	0.377691	0.466305	0.507215	0.394385	0.367673	0.623546	0.355304	0.493017	0.388628	0.430718	0.434066	0.419577	0.377449	0.436904	0.340839	0.369113	0.355324	0.415178	0.369731	0.411661	0.390181	0.389093	0.382657	0.3437	0.358568	0.357701	0.357386	0.665903	0.372179	0.381568	0.577175	0.430874	0.483024	0.365311	0.33856	0.395386	0.508565	0.433974	0.421728	0.357271	0.362366	0.36211	0.389018	0.370212	0.332625	0.605719
	1.12962	0.422045	0.537004	0.379995	0.448522	0.49299	0.371412	0.359268	0.560721	0.356921	0.479488	0.388647	0.421221	0.414882	0.416308	0.375421	0.430073	0.340311	0.365279	0.348361	0.419435	0.373859	0.405098	0.388516	0.382078	0.37624	0.337267	0.367006	0.355366	0.353754	0.595692	0.372038	0.365965	0.592026	0.429434	0.422675	0.350201	0.357455	0.395091	0.518515	0.409405	0.389473	0.370333	0.350442	0.360146	0.366596	0.37124	0.333277	0.612302
	1.16293	0.395907	0.554048	0.373537	0.41284	0.473136	0.367181	0.354315	0.524482	0.356016	0.465114	0.395266	0.412805	0.421924	0.429368	0.366103	0.41937	0.336478	0.365699	0.345873	0.411742	0.361338	0.400071	0.37189	0.381279	0.391132	0.348465	0.356227	0.347197	0.351943	0.512061	0.362564	0.350114	0.607569	0.432737	0.409927	0.373272	0.33251	0.389945	0.50904	0.414139	0.386613	0.361327	0.346838	0.351889	0.372411	0.361624	0.337162	0.633677
	1.19628	0.384284	0.563684	0.374975	0.399399	0.475384	0.37059	0.342477	0.502698	0.359604	0.47805	0.386099	0.409145	0.439091	0.420295	0.379331	0.432543	0.337138	0.365648	0.351759	0.406988	0.36274	0.396589	0.373158	0.379579	0.382113	0.33872	0.356392	0.347002	0.355711	0.435333	0.351209	0.37298	0.63381	0.428726	0.397439	0.381797	0.344618	0.4017	0.509495	0.408089	0.384022	0.366686	0.344518	0.354399	0.375877	0.364923	0.32925	0.63098
	1.2296	0.374737	0.568028	0.377753	0.381894	0.446708	0.352916	0.348444	0.474488	0.355566	0.457646	0.389279	0.410674	0.432371	0.412502	0.38284	0.431219	0.346613	0.365738	0.350991	0.411703	0.346002	0.384262	0.381676	0.375991	0.386871	0.335348	0.35557	0.34732	0.356488	0.415178	0.353165	0.367987	0.704772	0.430984	0.388359	0.37572	0.367224	0.378738	0.516325	0.389362	0.38648	0.360587	0.354271	0.355845	0.390227	0.36322	0.325533	0.596659
	1.26297	0.373143	0.545927	0.37995	0.36379	0.426823	0.347568	0.347897	0.456915	0.355774	0.453426	0.386844	0.408731	0.434648	0.401087	0.372997	0.453207	0.344388	0.366361	0.353853	0.423592	0.358637	0.378273	0.384063	0.399684	0.389258	0.346916	0.355903	0.33992	0.347775	0.394062	0.367482	0.374682	0.833295	0.423324	0.361528	0.367556	0.344078	0.395561	0.511506	0.388632	0.386369	0.3625	0.352377	0.347439	0.383844	0.374602	0.33169	0.587663
	1.29627	0.362803	0.562257	0.365941	0.379905	0.393646	0.350357	0.346105	0.444665	0.3488	0.428064	0.377741	0.400571	0.419146	0.401027	0.366588	0.485262	0.343278	0.381179	0.352323	0.398178	0.372305	0.370026	0.401304	0.378138	0.380006	0.347637	0.360995	0.342149	0.322964	0.420111	0.373112	0.361666	0.84564	0.429906	0.363675	0.361995	0.350109	0.387785	0.478439	0.394436	0.385655	0.355476	0.343706	0.360055	0.384535	0.366195	0.326186	0.606696
	1.32963	0.361229	0.564087	0.364969	0.377578	0.392499	0.355715	0.342301	0.428365	0.355351	0.417822	0.373607	0.390764	0.41679	0.407102	0.372865	0.511208	0.343821	0.368456	0.342161	0.402924	0.358487	0.367893	0.451655	0.391925	0.379466	0.346378	0.363641	0.341817	0.339045	0.425161	0.367738	0.367698	0.816778	0.426492	0.347817	0.36686	0.341311	0.378651	0.473007	0.395848	0.390179	0.348082	0.349485	0.353092	0.398344	0.355183	0.32416	0.627625
	1.36295	0.359741	0.567591	0.364223	0.39241	0.381213	0.346679	0.343256	0.417887	0.350939	0.415601	0.378673	0.39358	0.405637	0.399734	0.364052	0.658245	0.344725	0.371526	0.366015	0.398411	0.355656	0.356819	0.543574	0.377427	0.37124	0.351358	0.362889	0.335051	0.345002	0.413375	0.375383	0.362407	0.792122	0.425419	0.351491	0.346231	0.336426	0.387747	0.471129	0.424658	0.382912	0.350537	0.338054	0.357982	0.38966	0.361929	0.322577	0.594983
	1.39627	0.353135	0.605578	0.359111	0.386212	0.377219	0.349132	0.33778	0.40375	0.347724	0.431295	0.375461	0.384766	0.414639	0.382187	0.364629	1.00631	0.346167	0.361679	0.365987	0.421228	0.367326	0.357792	0.78273	0.370413	0.375097	0.349657	0.357383	0.339586	0.328571	0.451751	0.374575	0.360236	0.757863	0.42937	0.341651	0.360572	0.349446	0.385579	0.445971	0.465437	0.371208	0.361809	0.340685	0.355797	0.390116	0.35487	0.318611	0.555138
	1.42963	0.354582	0.624672	0.363625	0.382542	0.366345	0.342007	0.33858	0.397355	0.350202	0.399015	0.373688	0.38441	0.404588	0.390329	0.368403	1.08145	0.347183	0.359986	0.352253	0.390236	0.348546	0.349454	0.707932	0.368749	0.399178	0.341649	0.364403	0.332631	0.340104	0.450755	0.381901	0.376714	0.762127	0.425377	0.339177	0.365009	0.343998	0.414406	0.459677	0.515145	0.372618	0.355494	0.332759	0.349994	0.388641	0.367467	0.315587	0.529899
	1.46297	0.36268	0.631443	0.361869	0.391899	0.37074	0.34812	0.332905	0.395633	0.358285	0.423775	0.38167	0.391688	0.406184	0.388238	0.374344	1.01313	0.345593	0.372068	0.355148	0.40091	0.362342	0.357875	0.631689	0.357987	0.429998	0.354947	0.361788	0.334807	0.334381	0.451533	0.385252	0.362255	0.740509	0.421421	0.336368	0.363166	0.329086	0.419232	0.456191	0.844529	0.364334	0.359338	0.337607	0.347267	0.395512	0.363515	0.322135	0.49585
	1.49632	0.355865	0.610615	0.356357	0.387011	0.369579	0.353825	0.332778	0.395893	0.35758	0.431046	0.384456	0.384205	0.404556	0.385707	0.36494	0.934548	0.341831	0.368544	0.348655	0.418907	0.35789	0.35473	0.531662	0.368505	0.458783	0.355457	0.348962	0.330362	0.339756	0.428007	0.394607	0.354933	0.706078	0.420206	0.351341	0.363252	0.36118	0.415012	0.457783	1.04933	0.3684	0.35293	0.342438	0.353757	0.413535	0.357313	0.326762	0.49239
	1.52962	0.355186	0.566818	0.351796	0.379598	0.362686	0.354703	0.344415	0.391496	0.352413	0.438209	0.386607	0.384646	0.405	0.379236	0.360509	0.824046	0.342006	0.364942	0.346893	0.397185	0.355845	0.348205	0.479074	0.368492	0.522088	0.345487	0.358616	0.330983	0.336787	0.445052	0.377693	0.350572	0.673362	0.415166	0.348633	0.350433	0.347986	0.400181	0.447598	1.01135	0.378427	0.351453	0.339884	0.364884	0.440218	0.359036	0.324854	0.45823
	1.56292	0.356096	0.513544	0.34455	0.387392	0.367898	0.347992	0.338877	0.393244	0.356416	0.436322	0.38102	0.387742	0.40206	0.380423	0.36774	0.706565	0.341821	0.36553	0.357945	0.389956	0.357937	0.348064	0.426311	0.364197	0.688586	0.341843	0.358032	0.331072	0.34343	0.432154	0.382791	0.37737	0.652104	0.417136	0.347494	0.372983	0.338516	0.380904	0.446418	0.87683	0.356487	0.3602	0.339853	0.355026	0.536126	0.360334	0.320125	0.445708
	1.59627	0.361354	0.480358	0.349576	0.392481	0.361968	0.340014	0.334765	0.398836	0.358598	0.464264	0.391161	0.393762	0.4127	0.375023	0.386839	0.615713	0.334616	0.356971	0.361438	0.401633	0.348575	0.361195	0.411637	0.361238	0.771385	0.348207	0.356939	0.335677	0.342519	0.40637	0.380257	0.356915	0.64617	0.42808	0.349639	0.356929	0.34288	0.410299	0.43898	0.728927	0.371144	0.355835	0.350825	0.359628	0.648356	0.351644	0.32513	0.438194
	1.62963	0.356283	0.450246	0.344542	0.408043	0.368452	0.350619	0.336819	0.393665	0.354148	0.507784	0.379619	0.380142	0.403893	0.380843	0.363141	0.53658	0.339663	0.356392	0.360807	0.404367	0.365531	0.354432	0.383527	0.363408	0.664644	0.348162	0.354516	0.332354	0.333053	0.392603	0.377462	0.349734	0.604901	0.414153	0.342378	0.361167	0.347085	0.391524	0.441686	0.623754	0.360445	0.366121	0.336179	0.365256	0.673151	0.358599	0.321421	0.428271
	1.66295	0.366785	0.448067	0.350325	0.421978	0.366518	0.352374	0.35627	0.405058	0.354252	0.626443	0.387732	0.377748	0.38683	0.368608	0.36627	0.489594	0.337594	0.372659	0.35638	0.409227	0.360045	0.350921	0.382904	0.358648	0.591061	0.350333	0.354413	0.332141	0.343106	0.393849	0.388544	0.362398	0.598547	0.427705	0.345982	0.375072	0.362232	0.433696	0.440282	0.554044	0.384048	0.365708	0.347763	0.363375	0.654805	0.364525	0.330387	0.419979
	1.69627	0.377099	0.432019	0.350439	0.420391	0.369177	0.352385	0.372209	0.414404	0.360951	0.820448	0.388955	0.380399	0.385286	0.380459	0.365793	0.459269	0.342803	0.367165	0.358477	0.396256	0.356922	0.356993	0.401576	0.362945	0.498023	0.335321	0.349188	0.329276	0.343206	0.404216	0.378708	0.348917	0.571485	0.410659	0.347545	0.362587	0.328038	0.423844	0.432119	0.491927	0.361552	0.359878	0.335754	0.357208	0.587268	0.348805	0.322119	0.414151
	1.72962	0.398357	0.421521	0.343177	0.437915	0.369767	0.357315	0.388916	0.433517	0.364154	0.817843	0.391308	0.386718	0.402103	0.379241	0.373011	0.443192	0.343052	0.368842	0.354654	0.407284	0.364081	0.354649	0.394076	0.371889	0.4737	0.35457	0.342985	0.335787	0.33939	0.392524	0.384193	0.353787	0.556128	0.413794	0.336401	0.356914	0.349407	0.430162	0.423907	0.456081	0.368018	0.370087	0.347434	0.358544	0.572423	0.36696	0.327861	0.410449
	1.76293	0.419026	0.416541	0.346241	0.423692	0.346527	0.346528	0.426808	0.438843	0.345987	0.703926	0.38359	0.385078	0.38325	0.364083	0.370992	0.421644	0.342173	0.372233	0.362095	0.410657	0.364165	0.359184	0.428928	0.359067	0.428704	0.338984	0.34592	0.333729	0.33835	0.458942	0.396097	0.361774	0.519637	0.416432	0.338395	0.371162	0.321559	0.432763	0.42481	0.428581	0.364463	0.377802	0.342705	0.378268	0.582241	0.359276	0.323857	0.399694
	1.79627	0.440869	0.406811	0.351236	0.432636	0.368068	0.341376	0.521717	0.442062	0.350603	0.626371	0.39322	0.384355	0.386437	0.381348	0.364304	0.402607	0.342509	0.357405	0.346054	0.386088	0.351395	0.355202	0.490279	0.374228	0.394843	0.345413	0.354127	0.326508	0.337042	0.466491	0.400863	0.341945	0.507995	0.405793	0.337891	0.351463	0.356245	0.456041	0.424463	0.414772	0.358703	0.364552	0.337153	0.370404	0.569196	0.354577	0.322905	0.400479
	1.82963	0.495513	0.402461	0.336476	0.452509	0.356013	0.338918	0.699235	0.459358	0.36464	0.586621	0.418274	0.391318	0.373314	0.372478	0.364717	0.388276	0.337233	0.353644	0.353068	0.415953	0.356328	0.376264	0.526212	0.373382	0.393354	0.352969	0.358382	0.343411	0.33841	0.499287	0.405847	0.359788	0.469528	0.406583	0.335104	0.361393	0.36579	0.463573	0.42455	0.411556	0.364917	0.368544	0.34198	0.361348	0.537436	0.342542	0.330123	0.40561
	1.86297	0.619796	0.412363	0.36182	0.449645	0.379084	0.355774	0.798819	0.477424	0.366908	0.485331	0.428973	0.385801	0.379079	0.366757	0.365329	0.379745	0.342482	0.37006	0.357719	0.404999	0.350189	0.37019	0.544434	0.369742	0.374717	0.359723	0.352516	0.341298	0.341213	0.481195	0.403307	0.379906	0.44992	0.402232	0.342455	0.365931	0.335596	0.457583	0.436248	0.392675	0.37567	0.39076	0.346978	0.384287	0.51566	0.375029	0.335014	0.411842
	1.89627	0.565222	0.378423	0.32484	0.484138	0.35033	0.313267	0.660504	0.431831	0.339875	0.446914	0.447296	0.383425	0.373833	0.362262	0.355595	0.373632	0.342028	0.351701	0.350147	0.404318	0.342976	0.34537	0.52194	0.364446	0.360696	0.357582	0.343934	0.342976	0.340855	0.458413	0.405901	0.389797	0.415013	0.40723	0.339237	0.353806	0.345296	0.435355	0.455515	0.367097	0.376631	0.382789	0.341129	0.366696	0.472422	0.371419	0.327807	0.400887
	1.92962	0.565222	0.378423	0.32484	0.484138	0.35033	0.313267	0.660504	0.431831	0.339875	0.446914	0.447296	0.383425	0.373833	0.362262	0.355595	0.373632	0.342028	0.351701	0.350147	0.404318	0.342976	0.34537	0.52194	0.364446	0.360696	0.357582	0.343934	0.342976	0.340855	0.458413	0.405901	0.389797	0.415013	0.40723	0.339237	0.353806	0.345296	0.435355	0.455515	0.367097	0.376631	0.382789	0.341129	0.366696	0.472422	0.371419	0.327807	0.402349
	1.96295	0.344133	0.209999	0.18478	0.494841	0.202482	0.222635	0.346029	0.297185	0.177489	0.208045	0.499266	0.215226	0.217178	0.222168	0.25209	0.257695	0.207298	0.223975	0.218047	0.22461	0.213642	0.213681	0.202132	0.188225	0.125614	0.174197	0.181277	0.217514	0.217368	0.234374	0.223929	0.246082	0.222221	0.244916	0.200876	0.189326	0.113592	0.15732	0.277729	0.231278	0.238111	0.178949	0.205981	0.226271	0.283452	0.17927	0.200127	0.418545
	1.99628	0.613456	0.389321	0.350808	0.814949	0.350526	0.340265	0.51239	0.441101	0.348819	0.42245	1.29527	0.377428	0.392442	0.366326	0.375068	0.36553	0.348529	0.369511	0.346904	0.37598	0.362711	0.401981	0.417867	0.377538	0.349291	0.351777	0.355961	0.377049	0.352542	0.371081	0.383646	0.63333	0.350309	0.405792	0.350012	0.35628	0.34333	0.444656	0.43103	0.400399	0.402008	0.353914	0.346791	0.350321	0.43084	0.342946	0.325766	0.463506
	2.02958	0.678259	0.414552	0.351941	0.847641	0.365326	0.33828	0.490443	0.444647	0.346983	0.405827	1.31683	0.380139	0.384819	0.378212	0.37024	0.367493	0.368038	0.374632	0.36254	0.391197	0.366024	0.410373	0.403009	0.388806	0.350259	0.356608	0.350536	0.418582	0.375257	0.383129	0.392366	0.934767	0.414137	0.502106	0.420251	0.374328	0.355909	0.473709	0.450424	0.484101	0.416191	0.363436	0.225034	0.415798	0.445641	0.363498	0.325098	0.573069
	2.06297	0.74703	0.4498	0.353817	0.881187	0.383323	0.358892	0.500532	0.460709	0.357965	0.396335	1.32678	0.39647	0.407768	0.382665	0.375469	0.377351	0.406633	0.383817	0.377544	0.425757	0.38729	0.415181	0.404954	0.382074	0.362576	0.372319	0.365097	0.575526	0.443347	0.381129	0.394252	1.04697	0.347222	0.416568	0.362544	0.393846	0.36001	0.498295	0.471969	1.08909	0.516048	0.387666	0.394389	0.387565	0.440518	0.351713	0.335509	0.793552
	2.09628	0.792691	0.510874	0.359836	0.863417	0.39336	0.371788	0.503322	0.461194	0.355488	0.405843	1.34575	0.400988	0.398315	0.39267	0.384804	0.367141	0.559884	0.394249	0.370182	0.440468	0.39313	0.428423	0.398522	0.388884	0.404763	0.372473	0.380162	0.817229	0.873582	0.405562	0.403738	1.08754	0.344579	0.424836	0.393047	0.3975	0.385706	0.569232	0.495376	1.04127	0.665493	0.405507	0.496824	0.38888	0.446251	0.361767	0.343549	0.896384
	2.12963	0.847671	0.657299	0.378419	0.919636	0.425344	0.384005	0.526859	0.470621	0.390028	0.411731	1.4044	0.41706	0.401107	0.398848	0.38384	0.394936	0.935505	0.417419	0.407885	0.479439	0.408977	0.454028	0.418473	0.405938	0.419146	0.386132	0.401196	0.862965	0.94202	0.445941	0.405449	1.09676	0.357201	0.451291	0.468636	0.422229	0.409205	0.554904	0.558974	1.04755	0.921969	0.415551	0.975961	0.408945	0.475154	0.362972	0.351068	0.911346
	2.16293	0.853772	0.917374	0.388688	0.916171	0.446595	0.405768	0.539409	0.470593	0.38843	0.42118	1.40727	0.429823	0.43116	0.412299	0.403581	0.409228	1.07662	0.431827	0.404901	0.505655	0.428407	0.474121	0.437816	0.42899	0.469125	0.404111	0.401434	0.871664	0.951508	0.44892	0.436484	1.08695	0.360137	0.460704	0.67464	0.457781	0.456155	0.573837	0.600756	1.04866	1.01645	0.428973	1.01154	0.441547	0.502179	0.365602	0.365881	0.897615
	2.19628	0.830537	1.03951	0.397134	0.887729	0.522528	0.463847	0.575171	0.488607	0.411189	0.429389	1.35942	0.454996	0.460702	0.438017	0.407091	0.425354	1.07499	0.454437	0.438481	0.564818	0.455554	0.503003	0.452509	0.438327	0.469508	0.419356	0.427551	0.840271	0.940293	0.481439	0.434908	1.04758	0.355133	0.488545	0.836937	0.488761	0.483453	0.619017	0.630317	0.995098	1.05815	0.436074	0.995055	0.552239	0.530112	0.389107	0.366494	0.892727
	2.2296	0.83084	1.04686	0.418891	0.881591	0.735994	0.568155	0.60089	0.519018	0.420285	0.451853	1.37081	0.471887	0.468593	0.460349	0.420699	0.469789	1.09083	0.460093	0.458133	0.594009	0.471897	0.516526	0.450327	0.446295	0.562386	0.429408	0.437992	0.806868	0.976791	0.456676	0.447327	0.985073	0.365335	0.507	0.891367	0.483792	0.542219	0.576436	0.634901	1.00308	0.994443	0.449735	0.948862	0.699526	0.555334	0.380419	0.376429	0.846482
	2.26297	0.817806	1.08067	0.425414	0.859179	1.02981	0.676882	0.618228	0.538177	0.444942	0.47658	1.35826	0.492115	0.495683	0.547327	0.430071	0.609153	1.07272	0.504244	0.451377	0.628599	0.477737	0.529932	0.479382	0.467377	0.621894	0.454769	0.456319	0.786846	0.996413	0.472987	0.471601	1.01268	0.373228	0.521186	0.852008	0.52523	0.546634	0.595039	0.651005	0.930815	1.00489	0.477543	0.935271	0.835865	0.660638	0.397148	0.376002	0.866937
	2.29628	0.787727	1.03659	0.463276	0.810252	1.11	0.756298	0.604507	0.554484	0.489926	0.500879	1.31146	0.488204	0.539415	0.672201	0.448328	0.992122	1.0619	0.517603	0.492872	0.663707	0.493041	0.532387	0.462589	0.478326	0.6601	0.461227	0.47085	0.773339	0.999321	0.479259	0.469803	0.990951	0.374013	0.538081	0.847483	0.531052	0.606725	0.605468	0.682096	0.900714	1.01195	0.485062	0.911405	0.912639	0.74072	0.40191	0.385484	0.850774
	2.32965	0.760534	1.01225	0.502006	0.750314	1.09521	0.794507	0.596038	0.567713	0.548936	0.569489	1.33363	0.512756	0.552092	0.77489	0.451778	1.14378	1.04337	0.529718	0.482126	0.706725	0.494399	0.525515	0.47819	0.470569	0.732338	0.478069	0.485383	0.721801	1.00158	0.465205	0.502038	0.911469	0.380686	0.578666	0.803539	0.575874	0.60835	0.597299	0.667719	0.844946	0.924814	0.515021	0.843	0.920898	0.768041	0.402467	0.397184	0.824995
	2.36295	0.729693	0.98965	0.584629	0.711154	1.09208	0.806916	0.603254	0.586672	0.621345	0.607108	1.31869	0.516164	0.588241	0.840858	0.472577	1.0782	1.0361	0.550381	0.496807	0.774034	0.52052	0.545697	0.461652	0.465632	0.728964	0.502151	0.505648	0.688416	0.981408	0.462231	0.509298	0.902676	0.377229	0.577782	0.774031	0.611835	0.619112	0.578678	0.663387	0.818357	0.946729	0.520918	0.828888	0.937715	0.786651	0.414794	0.416132	0.798643
	2.39627	0.702483	0.963063	0.736609	0.692075	1.0706	0.811737	0.583826	0.584053	0.642668	0.649357	1.27363	0.542974	0.597064	0.831344	0.472244	1.06716	1.02787	0.562543	0.535661	0.771189	0.519461	0.553985	0.463219	0.485508	0.74135	0.498351	0.527543	0.65665	0.96273	0.465492	0.524313	0.879155	0.389439	0.603789	0.746458	0.614626	0.606406	0.581236	0.670539	0.800506	0.894637	0.514784	0.791068	0.98027	0.799325	0.41987	0.412589	0.791289
	2.42965	0.672073	0.929215	0.890665	0.677774	1.04863	0.795621	0.566257	0.599127	0.653111	0.655005	1.26944	0.550733	0.618012	0.812691	0.484273	1.03787	1.01116	0.564175	0.523384	0.838691	0.560154	0.56071	0.464515	0.478405	0.723249	0.509122	0.527111	0.622032	0.954717	0.415788	0.542182	0.835795	0.391218	0.610804	0.717968	0.653746	0.648671	0.594734	0.661515	0.734725	0.853713	0.518808	0.771106	0.969007	0.788411	0.423193	0.427871	0.780789
	2.46293	0.633985	0.887875	0.978857	0.641866	1.0067	0.821134	0.561809	0.591119	0.66815	0.672455	1.2137	0.560022	0.622224	0.795048	0.487041	0.978571	0.993875	0.589044	0.536209	0.845263	0.546033	0.552079	0.442617	0.486705	0.737711	0.511914	0.535608	0.607266	0.935007	0.423976	0.558465	0.766779	0.38618	0.616774	0.665649	0.713721	0.693742	0.564377	0.657643	0.719393	0.839385	0.531142	0.725533	0.954298	0.810612	0.439644	0.428716	0.762508
	2.4963	0.604806	0.86637	1.00201	0.600565	0.986189	0.784981	0.547298	0.567201	0.679869	0.657991	1.23589	0.569547	0.648771	0.749937	0.491144	0.913507	0.952491	0.593348	0.557812	0.84581	0.562889	0.549835	0.434879	0.486786	0.728137	0.526106	0.550283	0.558004	0.926121	0.418577	0.537433	0.744667	0.39044	0.618998	0.659261	0.733383	0.675257	0.544385	0.653963	0.68707	0.79808	0.515024	0.684782	0.92527	0.814065	0.436786	0.451706	0.742813
	2.52962	0.569249	0.837351	0.9858	0.577364	0.895295	0.74486	0.535902	0.56914	0.685747	0.659011	1.18416	0.557822	0.622059	0.737111	0.490568	0.874976	0.945818	0.601611	0.563016	0.860807	0.556392	0.555775	0.420733	0.5027	0.726001	0.541266	0.568113	0.552304	0.91206	0.399166	0.581997	0.732822	0.383891	0.642883	0.639226	0.721944	0.659561	0.555883	0.643413	0.671087	0.794017	0.521078	0.656964	0.909235	0.807243	0.439593	0.453552	0.746092
	2.56293	0.549127	0.798138	0.968414	0.562203	0.888979	0.754555	0.516861	0.552669	0.678045	0.612457	1.14955	0.568658	0.666669	0.72378	0.515623	0.817491	0.933545	0.625667	0.534409	0.851471	0.57692	0.55653	0.409979	0.500464	0.737992	0.540435	0.56774	0.529559	0.930884	0.412116	0.636276	0.691064	0.387435	0.635483	0.617396	0.770751	0.690106	0.530041	0.629196	0.625719	0.722613	0.506699	0.631008	0.841133	0.784015	0.445093	0.468859	0.718254
	2.59628	0.525919	0.776125	0.951312	0.52727	0.854176	0.749775	0.486369	0.55348	0.662456	0.578964	1.12378	0.566301	0.666443	0.69669	0.519688	0.809748	0.926013	0.624588	0.559683	0.857421	0.601625	0.545218	0.401776	0.518502	0.682769	0.568913	0.578874	0.506522	0.898676	0.401436	0.694376	0.676792	0.397429	0.652602	0.581053	0.745864	0.684669	0.52897	0.65469	0.606541	0.699117	0.499206	0.613613	0.894685	0.833433	0.439665	0.461541	0.716905
	2.62962	0.498931	0.735622	0.907184	0.509002	0.792532	0.723726	0.485531	0.540972	0.651577	0.572072	1.11286	0.55302	0.679506	0.660869	0.521816	0.759126	0.887598	0.64306	0.574187	0.881895	0.598011	0.540888	0.401256	0.526769	0.69213	0.55725	0.586227	0.487477	0.858083	0.404034	0.705488	0.620671	0.384792	0.641203	0.556121	0.761075	0.677821	0.507501	0.631797	0.576933	0.647562	0.503357	0.59533	0.848455	0.808638	0.447166	0.459705	0.696212
	2.66295	0.471493	0.71274	0.869702	0.503794	0.771643	0.674019	0.47306	0.536818	0.634203	0.558498	1.10347	0.554385	0.659466	0.635242	0.518593	0.711651	0.876003	0.667614	0.573378	0.838022	0.575034	0.541222	0.391178	0.530394	0.701925	0.550686	0.57591	0.464017	0.855802	0.379242	0.697615	0.593957	0.38672	0.646948	0.539304	0.715485	0.679069	0.498429	0.61139	0.540523	0.630871	0.489248	0.558944	0.82243	0.881011	0.452238	0.49937	0.692743
	2.6963	0.462262	0.683032	0.852355	0.485187	0.758416	0.663624	0.461009	0.516214	0.635144	0.533064	1.06109	0.561753	0.668048	0.63115	0.519798	0.660444	0.862395	0.677151	0.589562	0.807588	0.593541	0.549908	0.376414	0.571966	0.667563	0.54355	0.58285	0.4563	0.830775	0.378138	0.728004	0.581757	0.384805	0.650519	0.522881	0.697118	0.704486	0.500992	0.604761	0.536081	0.61601	0.490216	0.551627	0.817484	0.892042	0.448853	0.483316	0.669435
	2.72963	0.438925	0.662834	0.802887	0.467275	0.708088	0.655438	0.458204	0.511392	0.623432	0.506679	1.04262	0.556189	0.669833	0.623363	0.508129	0.642401	0.824254	0.728246	0.596205	0.832056	0.606451	0.55827	0.381831	0.598124	0.678939	0.562728	0.582084	0.428331	0.813032	0.36996	0.720267	0.57213	0.398248	0.667081	0.51527	0.721819	0.700069	0.512857	0.619527	0.522315	0.572606	0.478423	0.543603	0.855816	0.873711	0.453577	0.481608	0.67105
	2.76295	0.450801	0.658556	0.774813	0.459092	0.673086	0.649799	0.464939	0.510002	0.619283	0.501658	1.05118	0.560919	0.692274	0.581731	0.524054	0.619771	0.814998	0.758107	0.581881	0.862543	0.614089	0.563958	0.367974	0.615448	0.668211	0.575762	0.580383	0.427211	0.810748	0.36143	0.745404	0.554338	0.388626	0.653599	0.503612	0.738241	0.731489	0.48885	0.632339	0.498982	0.550183	0.47178	0.518042	0.797641	0.824657	0.467353	0.514721	0.637252
	2.79632	0.426012	0.622018	0.730666	0.445559	0.64965	0.614842	0.442315	0.487013	0.611144	0.4759	0.986466	0.554847	0.66819	0.568422	0.522439	0.592498	0.795869	0.764813	0.579927	0.786282	0.594859	0.553891	0.355592	0.59907	0.66323	0.562026	0.578765	0.416134	0.794309	0.356642	0.705609	0.544857	0.380265	0.660553	0.484875	0.719188	0.676885	0.469492	0.599547	0.484823	0.541256	0.473038	0.513088	0.785647	0.822873	0.459485	0.513524	0.639838
	2.82963	0.413315	0.606784	0.712286	0.430661	0.633579	0.603045	0.426969	0.480309	0.6017	0.462762	0.952904	0.555325	0.678608	0.553481	0.523783	0.562111	0.781206	0.760972	0.57089	0.77829	0.624403	0.554472	0.352851	0.606047	0.647085	0.568414	0.574361	0.400066	0.761671	0.357448	0.755674	0.523902	0.386869	0.648484	0.477445	0.72314	0.691537	0.459571	0.565418	0.473102	0.516961	0.471458	0.487469	0.75786	0.798419	0.466587	0.502741	0.623883
	2.86295	0.41918	0.589119	0.675384	0.421892	0.637123	0.579462	0.423626	0.461578	0.583401	0.457786	0.936859	0.54934	0.654176	0.539911	0.543434	0.537364	0.750065	0.787717	0.566086	0.824988	0.632218	0.583492	0.350248	0.589389	0.661225	0.57583	0.573283	0.393508	0.759591	0.349341	0.74759	0.489046	0.388249	0.681588	0.450868	0.688152	0.673543	0.43558	0.570091	0.471727	0.509541	0.466384	0.47547	0.760518	0.776579	0.466939	0.516869	0.616875
	2.89627	0.413237	0.570763	0.656249	0.42743	0.60959	0.557258	0.411849	0.45751	0.578495	0.438311	0.909658	0.553603	0.665954	0.528766	0.525238	0.516206	0.766716	0.773557	0.598921	0.769342	0.631856	0.580056	0.334867	0.573662	0.63248	0.584366	0.587065	0.391475	0.733793	0.341451	0.747623	0.503918	0.384838	0.653912	0.439879	0.700226	0.733602	0.446952	0.573	0.453661	0.504008	0.457267	0.468029	0.720693	0.750663	0.465499	0.528688	0.618112
	2.92963	0.40082	0.547564	0.634344	0.402473	0.587439	0.550642	0.408754	0.452198	0.563255	0.428561	0.892813	0.548739	0.63348	0.535333	0.536635	0.507783	0.742578	0.783062	0.604098	0.778273	0.647274	0.588948	0.340755	0.561214	0.601103	0.578477	0.573054	0.384997	0.718933	0.330809	0.749383	0.485313	0.382113	0.657413	0.435329	0.678662	0.684582	0.447814	0.550048	0.428171	0.487464	0.458838	0.449893	0.735967	0.73844	0.466951	0.559125	0.604648
	2.96293	0.393541	0.5499	0.604547	0.4067	0.571703	0.564693	0.408358	0.441126	0.568762	0.431177	0.886551	0.54634	0.645141	0.510041	0.527204	0.480509	0.718777	0.798871	0.613579	0.766736	0.651369	0.603473	0.334463	0.581298	0.63491	0.580812	0.577962	0.375064	0.734727	0.351182	0.772402	0.464728	0.380943	0.654901	0.441575	0.700036	0.696768	0.423807	0.573558	0.420049	0.493674	0.459068	0.450826	0.714285	0.727484	0.485785	0.559648	0.585096
	2.9963	0.391811	0.53376	0.573129	0.401512	0.559038	0.516733	0.397914	0.427855	0.566788	0.427327	0.856045	0.544838	0.60924	0.490612	0.549004	0.470093	0.698928	0.763204	0.588972	0.752889	0.633095	0.595257	0.327339	0.587814	0.588067	0.570914	0.565979	0.361041	0.698716	0.337076	0.783879	0.458066	0.376816	0.66256	0.424669	0.67503	0.665159	0.429455	0.545869	0.408642	0.478075	0.437914	0.439342	0.7037	0.712821	0.469674	0.594283	0.588275
	3.02962	0.378927	0.511184	0.567446	0.388602	0.538011	0.528737	0.395404	0.422073	0.54833	0.410413	0.813681	0.551194	0.639261	0.491769	0.542774	0.459774	0.696797	0.745458	0.571315	0.760028	0.649573	0.580979	0.324992	0.560111	0.58223	0.573367	0.564872	0.362677	0.676138	0.341254	0.792447	0.449475	0.377451	0.672341	0.411004	0.625607	0.653941	0.399494	0.544738	0.422133	0.459045	0.434679	0.435179	0.71613	0.661641	0.474963	0.580657	0.570037
	3.06298	0.380084	0.511128	0.530666	0.391097	0.537351	0.498013	0.395019	0.421941	0.556119	0.416639	0.829245	0.538661	0.636055	0.47435	0.540872	0.452779	0.667791	0.750418	0.601059	0.75116	0.649512	0.594939	0.340837	0.551856	0.571946	0.572345	0.555839	0.365422	0.662857	0.351254	0.7907	0.453848	0.382405	0.644721	0.39684	0.66193	0.65283	0.402706	0.534451	0.396859	0.432373	0.437913	0.42819	0.685503	0.673871	0.474972	0.584635	0.557532
	3.09628	0.376047	0.492523	0.518209	0.376975	0.507909	0.494703	0.379594	0.414817	0.536335	0.390636	0.787423	0.544554	0.611711	0.478536	0.543299	0.438408	0.660181	0.717578	0.589366	0.723854	0.642818	0.569232	0.33218	0.544122	0.557661	0.559692	0.562022	0.351741	0.637972	0.34205	0.785837	0.443578	0.377437	0.639142	0.402054	0.62896	0.671152	0.394347	0.515262	0.41078	0.443059	0.427208	0.418582	0.679419	0.657959	0.480473	0.586749	0.54436
	3.12962	0.365682	0.478217	0.501027	0.372627	0.528414	0.479432	0.37793	0.417716	0.537003	0.409425	0.760353	0.53744	0.610363	0.463522	0.545612	0.426448	0.654224	0.716236	0.587505	0.712143	0.605883	0.569864	0.332206	0.538706	0.536587	0.56216	0.555709	0.349414	0.630993	0.335902	0.76798	0.431102	0.374086	0.641481	0.391702	0.63339	0.653055	0.38465	0.516475	0.38638	0.414935	0.414847	0.416216	0.664551	0.630956	0.488028	0.592987	0.541809
	3.16297	0.368804	0.470575	0.484566	0.361183	0.508834	0.470651	0.371253	0.403998	0.51398	0.392257	0.759036	0.535654	0.610213	0.45455	0.549718	0.431298	0.635622	0.718438	0.586671	0.724309	0.640521	0.554092	0.31414	0.556687	0.547339	0.556761	0.551729	0.346888	0.614901	0.322488	0.787381	0.432379	0.362495	0.636189	0.382966	0.612352	0.645033	0.38366	0.495164	0.395308	0.411734	0.413393	0.392696	0.635705	0.644966	0.469375	0.588411	0.521676
	3.1963	0.362167	0.470238	0.472254	0.364803	0.495236	0.474828	0.364391	0.400927	0.512419	0.385528	0.731537	0.531154	0.587204	0.439841	0.538259	0.416592	0.635604	0.70798	0.601226	0.671252	0.622786	0.541506	0.324505	0.548213	0.521907	0.569702	0.561478	0.343136	0.597961	0.325346	0.759657	0.435452	0.362699	0.64594	0.378228	0.610072	0.644849	0.37455	0.498849	0.370458	0.434742	0.419576	0.401934	0.638743	0.635506	0.474201	0.591627	0.534588
	3.22965	0.363148	0.466984	0.467824	0.362243	0.505108	0.470558	0.375495	0.394002	0.522105	0.383326	0.718814	0.536255	0.610044	0.444023	0.533068	0.407031	0.622829	0.688747	0.592143	0.673451	0.605593	0.552815	0.331136	0.551076	0.505856	0.582965	0.533929	0.3455	0.601156	0.332246	0.741248	0.430008	0.367365	0.64279	0.378601	0.605048	0.669542	0.375344	0.48386	0.382081	0.405429	0.411453	0.379658	0.631964	0.608964	0.479914	0.594541	0.499795
	3.26293	0.36568	0.456218	0.444496	0.361242	0.504662	0.458616	0.362595	0.387831	0.506574	0.374944	0.695986	0.538127	0.587795	0.436116	0.52819	0.410396	0.611974	0.691286	0.596527	0.68836	0.619664	0.54763	0.317745	0.538381	0.500345	0.546646	0.554653	0.336274	0.600353	0.327385	0.726297	0.409638	0.369158	0.642017	0.371277	0.5913	0.631552	0.362929	0.481807	0.375299	0.397929	0.40586	0.380728	0.60474	0.61432	0.46141	0.584001	0.505768
	3.29628	0.361445	0.449935	0.44982	0.359098	0.500411	0.469174	0.354005	0.384436	0.503299	0.39281	0.68147	0.533411	0.587821	0.433383	0.533429	0.396343	0.605901	0.675859	0.600416	0.684106	0.634094	0.554956	0.322283	0.536299	0.501024	0.552919	0.521406	0.337606	0.588599	0.330601	0.745068	0.400211	0.376128	0.650325	0.370233	0.603878	0.617813	0.357065	0.466419	0.38439	0.400212	0.406156	0.385877	0.587392	0.616292	0.470399	0.589827	0.489328
	3.32965	0.362482	0.440581	0.436328	0.352474	0.471635	0.449717	0.348796	0.396494	0.499722	0.390287	0.671061	0.531801	0.584766	0.438044	0.537203	0.392421	0.603222	0.665883	0.585413	0.651596	0.631776	0.541907	0.321377	0.519579	0.480876	0.545627	0.540748	0.337923	0.575185	0.34402	0.722435	0.404763	0.365665	0.626653	0.366854	0.576938	0.640953	0.379544	0.478842	0.364884	0.398476	0.407897	0.373537	0.572303	0.603531	0.472785	0.614093	0.479878
	3.36292	0.353303	0.431861	0.425072	0.356359	0.462098	0.433869	0.342416	0.378014	0.486684	0.365264	0.655347	0.52026	0.569989	0.417905	0.533305	0.381914	0.576908	0.647729	0.578478	0.63647	0.613478	0.526163	0.314114	0.520806	0.463786	0.542526	0.533419	0.328955	0.55661	0.334151	0.698431	0.389227	0.359545	0.621158	0.357152	0.540683	0.606419	0.371124	0.461896	0.353132	0.373918	0.395983	0.360521	0.549009	0.610104	0.47606	0.596238	0.474938
	3.39627	0.353398	0.428819	0.419349	0.34961	0.470691	0.441287	0.349968	0.378575	0.486019	0.369166	0.654241	0.532288	0.555468	0.415855	0.536865	0.379969	0.578165	0.664479	0.575766	0.64631	0.630643	0.521585	0.314674	0.516385	0.47566	0.543561	0.501365	0.328189	0.538537	0.319366	0.690521	0.392479	0.362509	0.613538	0.36524	0.57858	0.588982	0.36372	0.469184	0.364118	0.391356	0.395356	0.368602	0.525535	0.621892	0.474945	0.592054	0.466476
	3.42962	0.344253	0.416994	0.41811	0.340555	0.458531	0.411004	0.345782	0.374271	0.468518	0.368175	0.618341	0.508849	0.536589	0.41384	0.520997	0.383362	0.561779	0.641716	0.558089	0.641824	0.619519	0.510853	0.315868	0.502796	0.449159	0.547968	0.504085	0.328083	0.531798	0.327635	0.679906	0.389282	0.353828	0.595952	0.351236	0.539359	0.596884	0.34346	0.450288	0.357129	0.378494	0.399456	0.365947	0.548345	0.609612	0.467139	0.602725	0.47876
	3.46297	0.356608	0.423041	0.40785	0.347695	0.451068	0.424719	0.342571	0.375074	0.472313	0.371044	0.606656	0.515244	0.571446	0.416944	0.539676	0.381411	0.563113	0.666221	0.567447	0.635143	0.614818	0.502674	0.313847	0.495305	0.446356	0.547782	0.52229	0.324099	0.523527	0.324321	0.673107	0.393491	0.35698	0.590122	0.346116	0.539713	0.623645	0.351424	0.442336	0.347178	0.375697	0.392211	0.371294	0.5348	0.599205	0.481618	0.60137	0.466367
	3.4963	0.346323	0.413661	0.396306	0.354279	0.459089	0.408987	0.335886	0.372882	0.459642	0.356031	0.605859	0.513497	0.556039	0.390325	0.519334	0.371005	0.553679	0.62775	0.561029	0.618014	0.615458	0.498141	0.316891	0.495021	0.443626	0.538514	0.51621	0.322137	0.514254	0.33284	0.682834	0.373781	0.364259	0.600945	0.343175	0.543998	0.606794	0.373272	0.452271	0.340073	0.359463	0.402618	0.358012	0.53702	0.571177	0.470989	0.603884	0.469279
	3.52963	0.343119	0.404556	0.401533	0.339565	0.43848	0.411201	0.335498	0.374535	0.463695	0.364814	0.594677	0.517066	0.553471	0.393627	0.522282	0.379729	0.534722	0.638592	0.562155	0.603347	0.61112	0.49358	0.315746	0.492048	0.430361	0.532606	0.490645	0.320049	0.510934	0.314715	0.680557	0.377721	0.35017	0.599949	0.343776	0.536769	0.601429	0.36553	0.441321	0.354576	0.372218	0.400038	0.358857	0.519298	0.563727	0.467006	0.570067	0.459074
	3.56293	0.348345	0.407793	0.386796	0.342339	0.444786	0.413292	0.3386	0.367043	0.461037	0.354995	0.581144	0.512373	0.538851	0.388671	0.52006	0.369278	0.535337	0.619616	0.570366	0.579278	0.607914	0.482408	0.31575	0.491656	0.434001	0.55152	0.497027	0.322786	0.508726	0.31286	0.660859	0.37504	0.361365	0.592687	0.348173	0.498767	0.59852	0.34311	0.447397	0.348516	0.356009	0.406095	0.349544	0.514138	0.546736	0.478815	0.58939	0.455008
	3.59627	0.337013	0.39801	0.375545	0.325257	0.432486	0.394157	0.325107	0.369925	0.435917	0.359474	0.546052	0.49949	0.535514	0.38216	0.525092	0.359748	0.536839	0.59917	0.55143	0.593075	0.603313	0.472783	0.308951	0.474641	0.397444	0.532641	0.48762	0.315396	0.484362	0.304796	0.638207	0.365116	0.358728	0.577636	0.341157	0.52099	0.574005	0.339421	0.429553	0.344079	0.368788	0.382404	0.349584	0.48934	0.529767	0.466691	0.566463	0.451232
	3.62962	0.338821	0.408275	0.402073	0.337193	0.427953	0.391115	0.334405	0.369243	0.442156	0.356771	0.555243	0.50468	0.524733	0.393123	0.518967	0.360913	0.529697	0.601139	0.523771	0.55682	0.599485	0.475125	0.304401	0.46966	0.409867	0.536198	0.482087	0.324432	0.498114	0.317647	0.648731	0.361117	0.353596	0.593962	0.339331	0.512339	0.60895	0.347202	0.440177	0.353189	0.338968	0.392058	0.35516	0.533555	0.531734	0.472044	0.596071	0.446351
	3.66297	0.336641	0.395251	0.380637	0.3325	0.419104	0.389868	0.330747	0.35695	0.440359	0.357689	0.545099	0.496814	0.535749	0.377013	0.526883	0.361138	0.532389	0.599782	0.549239	0.581147	0.598603	0.467321	0.311333	0.4748	0.405252	0.533867	0.48225	0.318527	0.497235	0.326893	0.62132	0.359306	0.349638	0.58782	0.335626	0.497061	0.566696	0.349536	0.432145	0.33497	0.345494	0.3718	0.34594	0.501812	0.509295	0.475069	0.568544	0.433227
	3.69628	0.336441	0.387459	0.371255	0.338594	0.406534	0.380197	0.321009	0.369977	0.42777	0.351663	0.551349	0.500091	0.53806	0.382415	0.503582	0.366739	0.522337	0.589045	0.519233	0.552424	0.601388	0.476655	0.305047	0.467233	0.417308	0.537992	0.476098	0.317781	0.494462	0.334374	0.63549	0.350422	0.352003	0.592591	0.334187	0.484064	0.567897	0.355206	0.425079	0.336196	0.35912	0.387417	0.349858	0.505108	0.501331	0.463982	0.557447	0.431411
	3.72962	0.341333	0.380311	0.378542	0.336119	0.400105	0.381943	0.331082	0.362431	0.425624	0.360327	0.543184	0.489797	0.524289	0.377456	0.517103	0.358596	0.517786	0.591225	0.519944	0.551765	0.591029	0.464966	0.319734	0.487576	0.415823	0.531619	0.493557	0.318155	0.478062	0.321631	0.634655	0.352436	0.353685	0.573141	0.337448	0.500445	0.581526	0.339991	0.421543	0.343091	0.355121	0.377348	0.34658	0.514809	0.492013	0.465656	0.572414	0.428529
	3.76295	0.345309	0.384219	0.370128	0.333235	0.409881	0.378768	0.319531	0.357177	0.40907	0.355023	0.524614	0.482994	0.519424	0.355175	0.499135	0.354197	0.531213	0.587044	0.508421	0.533246	0.585566	0.461668	0.305843	0.474554	0.387719	0.532587	0.471258	0.31948	0.477634	0.317704	0.627922	0.351478	0.347684	0.561656	0.332511	0.485177	0.546036	0.351514	0.402354	0.337186	0.354894	0.371098	0.345095	0.493526	0.468592	0.459972	0.557527	0.422772
	3.79627	0.33675	0.376092	0.364423	0.33029	0.403286	0.380951	0.317709	0.359842	0.410977	0.356783	0.512797	0.482833	0.496077	0.358898	0.50688	0.358635	0.507611	0.596477	0.514135	0.537634	0.561245	0.460215	0.303723	0.458606	0.381179	0.519508	0.456217	0.310418	0.463242	0.318994	0.617569	0.338709	0.341213	0.565398	0.334256	0.480014	0.541361	0.35545	0.404288	0.344464	0.356677	0.375495	0.33737	0.479218	0.464917	0.454695	0.559636	0.415684
	3.82962	0.337258	0.370969	0.358999	0.31872	0.3908	0.373183	0.310934	0.364504	0.399814	0.343929	0.498587	0.487754	0.49467	0.371755	0.498014	0.355523	0.504602	0.577021	0.489402	0.526851	0.588044	0.446247	0.313014	0.460454	0.399586	0.522645	0.45503	0.313534	0.462313	0.326056	0.621847	0.328633	0.345941	0.561238	0.325144	0.477899	0.578094	0.34525	0.412698	0.341452	0.34511	0.374827	0.330003	0.477526	0.456484	0.464586	0.554444	0.415068
	3.86298	0.334574	0.377447	0.355662	0.32704	0.370017	0.368752	0.317398	0.356221	0.390804	0.350314	0.506752	0.470119	0.521146	0.36404	0.483837	0.350281	0.497537	0.5567	0.497258	0.521048	0.575321	0.449995	0.309051	0.463405	0.375203	0.507728	0.462569	0.3112	0.469926	0.312985	0.616803	0.332504	0.340741	0.563328	0.323896	0.456734	0.559676	0.347094	0.395636	0.335689	0.351004	0.373152	0.33536	0.47347	0.455377	0.456754	0.552265	0.417537
	3.89628	0.335597	0.370543	0.357677	0.328218	0.382944	0.374719	0.311132	0.348484	0.393978	0.356193	0.493505	0.474959	0.49886	0.34436	0.496392	0.344132	0.498767	0.580987	0.488943	0.513267	0.55559	0.442021	0.31288	0.460637	0.374494	0.528228	0.440057	0.305861	0.440106	0.309697	0.605638	0.339468	0.333884	0.572108	0.328954	0.482057	0.560048	0.343727	0.392462	0.338759	0.347498	0.368449	0.333105	0.459742	0.453124	0.45808	0.538958	0.40681
	3.92958	0.331198	0.366647	0.355842	0.331201	0.390824	0.362959	0.315875	0.348469	0.402349	0.34864	0.488015	0.466081	0.513188	0.337173	0.490071	0.346028	0.488327	0.578235	0.502659	0.507912	0.56553	0.443995	0.317341	0.44508	0.365721	0.519997	0.447579	0.314464	0.456035	0.315876	0.599348	0.32874	0.341772	0.545705	0.3271	0.462677	0.516096	0.342613	0.387851	0.335001	0.333384	0.373965	0.331379	0.458406	0.433431	0.449013	0.540517	0.408422
	3.96297	0.329683	0.373856	0.350084	0.334106	0.374845	0.363503	0.309393	0.344464	0.381822	0.343599	0.486147	0.465808	0.500459	0.350295	0.494956	0.345034	0.478433	0.542556	0.501447	0.501095	0.555865	0.416513	0.312434	0.45133	0.357535	0.531251	0.443145	0.306588	0.45547	0.317015	0.604125	0.335084	0.336147	0.543888	0.321313	0.466765	0.544389	0.341066	0.393541	0.337718	0.334634	0.364446	0.331489	0.459464	0.43233	0.445993	0.531101	0.400507
	3.99628	0.327837	0.373466	0.344346	0.323061	0.371917	0.346143	0.312647	0.338888	0.386855	0.34949	0.477165	0.460954	0.486482	0.343551	0.485505	0.342826	0.477269	0.552385	0.488895	0.473806	0.563851	0.434421	0.300034	0.443316	0.373912	0.512978	0.427043	0.310444	0.442104	0.314696	0.576062	0.322025	0.332964	0.532859	0.320954	0.441145	0.522611	0.347052	0.39175	0.319682	0.329271	0.363855	0.327691	0.432797	0.423126	0.45146	0.523197	0.403806
	4.02962	0.328286	0.365973	0.343458	0.325831	0.381802	0.343599	0.306051	0.345611	0.376068	0.348731	0.483746	0.451448	0.505425	0.343824	0.494317	0.348699	0.476426	0.56416	0.499036	0.486234	0.56186	0.421809	0.298547	0.441794	0.376605	0.501822	0.419581	0.303339	0.43989	0.325905	0.581135	0.318512	0.333219	0.547867	0.322761	0.436029	0.524621	0.336404	0.38419	0.330497	0.339239	0.370122	0.330961	0.438893	0.423849	0.445152	0.525176	0.395008
	4.06293	0.325462	0.364988	0.343521	0.33025	0.368257	0.345829	0.306151	0.337295	0.369656	0.340124	0.476917	0.453779	0.491034	0.329497	0.480447	0.352893	0.46766	0.550904	0.470503	0.469996	0.550912	0.422302	0.307477	0.428068	0.355858	0.496318	0.409915	0.309745	0.415852	0.321216	0.556323	0.315164	0.336637	0.525857	0.324628	0.437754	0.51457	0.336177	0.380259	0.325793	0.340307	0.366616	0.323049	0.410934	0.406621	0.43749	0.533921	0.390752
	4.09627	0.332654	0.362969	0.332579	0.328457	0.373318	0.347226	0.311875	0.339325	0.374954	0.342987	0.482081	0.451307	0.460823	0.344129	0.483814	0.343764	0.480215	0.562442	0.475873	0.459064	0.539057	0.436365	0.299652	0.431657	0.343191	0.499978	0.406429	0.301802	0.413712	0.316774	0.561907	0.323935	0.334898	0.51758	0.321647	0.44499	0.540489	0.326692	0.360066	0.325191	0.339191	0.369445	0.334638	0.408598	0.406543	0.435173	0.523259	0.385824
	4.12962	0.327679	0.364849	0.342745	0.313854	0.358277	0.346132	0.304705	0.339304	0.361678	0.335841	0.47484	0.446013	0.479718	0.333409	0.484523	0.333086	0.461854	0.54457	0.469897	0.463573	0.541504	0.420758	0.306236	0.427714	0.358788	0.485689	0.418927	0.30911	0.42197	0.316175	0.558572	0.314	0.32384	0.528121	0.314668	0.435504	0.483806	0.343261	0.362146	0.33238	0.341528	0.358605	0.323473	0.419893	0.393445	0.443894	0.517703	0.386007
	4.16297	0.327859	0.358791	0.329107	0.328906	0.352603	0.347828	0.300292	0.344672	0.357574	0.349545	0.455564	0.438798	0.480287	0.342578	0.471915	0.339572	0.45158	0.568411	0.468549	0.460706	0.530857	0.429933	0.309391	0.423906	0.364651	0.480837	0.407061	0.303051	0.416362	0.320869	0.544763	0.320593	0.327046	0.515715	0.333855	0.42628	0.52068	0.33082	0.368996	0.335796	0.327195	0.371837	0.326399	0.416915	0.401625	0.433369	0.533208	0.386122
	4.19623	0.32789	0.361776	0.32754	0.323367	0.36167	0.33745	0.306356	0.33843	0.364721	0.35151	0.455247	0.444738	0.484015	0.33728	0.463228	0.333033	0.464008	0.55974	0.481663	0.458163	0.537875	0.406647	0.309396	0.435333	0.366199	0.486778	0.387672	0.304221	0.410523	0.318206	0.557791	0.311449	0.326273	0.513705	0.330661	0.434341	0.521476	0.336301	0.367237	0.325309	0.339357	0.355279	0.331116	0.4173	0.401029	0.429548	0.545862	0.388994
	4.22963	0.324196	0.364254	0.322339	0.322757	0.368859	0.332998	0.304578	0.350349	0.370581	0.337723	0.467364	0.434824	0.465584	0.327682	0.459028	0.344517	0.447468	0.553579	0.466093	0.446393	0.534619	0.400861	0.305371	0.419946	0.342492	0.469988	0.382436	0.303658	0.402648	0.306136	0.540717	0.303163	0.325548	0.500524	0.317979	0.434042	0.501126	0.347413	0.355491	0.324803	0.328093	0.361483	0.322739	0.4054	0.376662	0.428976	0.580169	0.37989
	4.26295	0.329779	0.36051	0.331653	0.32018	0.370318	0.340533	0.310997	0.344046	0.354139	0.347832	0.457744	0.432033	0.46266	0.332061	0.468238	0.337891	0.452953	0.540236	0.466325	0.437693	0.538832	0.408514	0.309917	0.40958	0.347853	0.477236	0.389939	0.298887	0.424977	0.305908	0.537076	0.310204	0.332591	0.48963	0.336426	0.419576	0.518392	0.325973	0.365305	0.323357	0.330941	0.359562	0.323774	0.392709	0.386525	0.434795	0.634832	0.381084
	4.2963	0.334235	0.354579	0.328797	0.318694	0.362719	0.326527	0.294053	0.343433	0.353731	0.350245	0.461121	0.424162	0.462087	0.325624	0.465042	0.334354	0.44174	0.568303	0.44885	0.440346	0.528399	0.406509	0.308568	0.42199	0.353762	0.473557	0.378447	0.308238	0.417558	0.311766	0.530822	0.323353	0.320779	0.503939	0.320612	0.431846	0.510005	0.317809	0.354488	0.319209	0.335159	0.353582	0.327996	0.37962	0.377378	0.422635	0.685461	0.380902
	4.32965	0.322321	0.357191	0.326247	0.316928	0.361311	0.324518	0.295908	0.336848	0.344647	0.343526	0.447602	0.428424	0.464191	0.331152	0.486878	0.340645	0.439874	0.538815	0.453558	0.426733	0.529399	0.408962	0.298728	0.413883	0.331465	0.472149	0.38488	0.303412	0.411814	0.313068	0.520487	0.30209	0.323187	0.493114	0.318647	0.411898	0.486507	0.319644	0.356138	0.317629	0.330089	0.356558	0.318144	0.381596	0.378595	0.420541	0.714198	0.377839
	4.36297	0.337367	0.356596	0.323066	0.323271	0.366021	0.342496	0.29922	0.350882	0.351993	0.352448	0.4468	0.423432	0.4538	0.32202	0.469924	0.344953	0.439943	0.543245	0.459355	0.420047	0.506093	0.402612	0.309263	0.405361	0.344198	0.483723	0.379353	0.312372	0.415351	0.312658	0.534152	0.30381	0.323399	0.490618	0.323991	0.406615	0.479855	0.343902	0.347274	0.326352	0.325221	0.361923	0.32194	0.384663	0.378249	0.428925	0.714942	0.378785
	4.39627	0.327801	0.354773	0.326663	0.318748	0.346959	0.325545	0.29956	0.339138	0.344883	0.346761	0.445539	0.41782	0.445802	0.332252	0.46225	0.336956	0.431266	0.527846	0.42953	0.430605	0.496984	0.411264	0.301397	0.399265	0.355372	0.458384	0.374565	0.301544	0.394826	0.323192	0.509045	0.308296	0.325698	0.487539	0.321113	0.401211	0.517822	0.338826	0.343821	0.314896	0.325532	0.351017	0.321159	0.377992	0.378433	0.415737	0.736026	0.369831
	4.42962	0.324167	0.350104	0.321337	0.322259	0.343208	0.322089	0.299227	0.33845	0.347907	0.342966	0.435765	0.414937	0.434698	0.321892	0.449992	0.332277	0.43132	0.508258	0.430263	0.406342	0.51553	0.394915	0.302745	0.383352	0.330436	0.450867	0.363971	0.302449	0.395294	0.31301	0.511908	0.295455	0.327824	0.489243	0.322523	0.397913	0.487868	0.331131	0.342007	0.317279	0.324489	0.350313	0.31598	0.359916	0.368143	0.40575	0.723367	0.374536
	4.46297	0.332205	0.350877	0.328435	0.321099	0.352722	0.335806	0.303982	0.337885	0.345313	0.348293	0.429709	0.427552	0.449507	0.310717	0.44931	0.332289	0.424445	0.490728	0.429603	0.414242	0.492177	0.395575	0.313465	0.39139	0.340964	0.444804	0.353166	0.298124	0.407017	0.316624	0.503079	0.294899	0.323962	0.480954	0.311904	0.386905	0.488604	0.327605	0.336737	0.314394	0.320994	0.350655	0.32221	0.365807	0.367474	0.410302	0.697126	0.372934
	4.4963	0.326063	0.359148	0.323301	0.323546	0.345045	0.327105	0.295351	0.338392	0.347176	0.352672	0.42516	0.419661	0.440277	0.31577	0.454596	0.344486	0.41995	0.490161	0.433442	0.416654	0.501534	0.393683	0.301385	0.396391	0.339887	0.44893	0.351179	0.305978	0.388297	0.309087	0.500994	0.305623	0.321347	0.48538	0.315483	0.411705	0.495801	0.324405	0.339426	0.325094	0.335261	0.343472	0.319938	0.369558	0.353694	0.398699	0.670584	0.371487
	4.52962	0.330218	0.35146	0.327149	0.317692	0.350355	0.324282	0.298139	0.342061	0.337667	0.346861	0.425086	0.412837	0.430054	0.320793	0.458911	0.331395	0.411559	0.492127	0.442331	0.412627	0.49282	0.391021	0.309328	0.394664	0.335636	0.444203	0.357077	0.305934	0.389614	0.302465	0.501267	0.302006	0.325017	0.477959	0.324748	0.410396	0.481024	0.323326	0.343719	0.319317	0.32831	0.350132	0.314456	0.370647	0.371452	0.41246	0.685931	0.370361
	4.56295	0.329949	0.354615	0.313466	0.323124	0.346767	0.319755	0.298679	0.336108	0.334587	0.341901	0.421227	0.407758	0.426624	0.318164	0.450631	0.339722	0.407317	0.465954	0.420513	0.381245	0.49638	0.384286	0.300201	0.385977	0.340805	0.436834	0.358829	0.304954	0.376601	0.316588	0.497331	0.299674	0.314769	0.462861	0.320635	0.37969	0.461176	0.332322	0.331587	0.324998	0.325655	0.346125	0.319656	0.359311	0.365387	0.400885	0.657536	0.370997
	4.59628	0.320429	0.346388	0.308797	0.314561	0.344579	0.321826	0.292977	0.336892	0.337194	0.334804	0.415456	0.399666	0.434691	0.318917	0.441009	0.328217	0.405208	0.465759	0.424201	0.396739	0.481588	0.374012	0.302906	0.386395	0.329086	0.448632	0.343706	0.303482	0.373447	0.313063	0.476234	0.295893	0.320887	0.472337	0.327106	0.389237	0.478989	0.33137	0.339582	0.31186	0.33497	0.338998	0.314299	0.356995	0.351899	0.399805	0.651063	0.364064
	4.62965	0.325137	0.352184	0.322912	0.327949	0.348323	0.313979	0.300269	0.332582	0.338053	0.344255	0.421277	0.412214	0.430582	0.321882	0.440779	0.335597	0.408552	0.473274	0.423932	0.395466	0.491801	0.386529	0.30247	0.381063	0.331656	0.445571	0.341239	0.300202	0.371098	0.305829	0.481727	0.314797	0.325982	0.47189	0.323128	0.388489	0.473833	0.332151	0.332027	0.318435	0.329276	0.347343	0.319647	0.360186	0.362653	0.413266	0.623968	0.360096
	4.66295	0.329476	0.342508	0.319799	0.322524	0.345968	0.323906	0.305119	0.332456	0.329628	0.35649	0.40899	0.40521	0.424546	0.333405	0.430056	0.335939	0.410648	0.470151	0.425003	0.40189	0.477226	0.382032	0.299144	0.384979	0.352136	0.439694	0.342222	0.305575	0.382201	0.309555	0.474845	0.307306	0.32634	0.466248	0.32621	0.383352	0.449936	0.329652	0.33992	0.329657	0.31187	0.344401	0.317928	0.346291	0.35945	0.414022	0.615479	0.360872
	4.69628	0.323432	0.343023	0.316186	0.321351	0.342384	0.314608	0.29662	0.335488	0.33137	0.342886	0.40174	0.403287	0.42061	0.332172	0.43934	0.336608	0.399414	0.467583	0.407809	0.391466	0.455682	0.375313	0.299137	0.38591	0.328854	0.436058	0.333525	0.300428	0.371437	0.314649	0.465231	0.29164	0.314162	0.465576	0.323724	0.380028	0.454848	0.320635	0.335382	0.313778	0.324349	0.337938	0.32028	0.355808	0.35115	0.407237	0.607168	0.359279
	4.72963	0.328863	0.349582	0.314664	0.315927	0.3541	0.304391	0.297801	0.345997	0.33382	0.35581	0.399698	0.393627	0.430271	0.322313	0.44084	0.331754	0.401782	0.459173	0.420538	0.382112	0.456759	0.390961	0.311928	0.378405	0.332048	0.42957	0.332877	0.303469	0.357046	0.300099	0.450017	0.298983	0.318249	0.454289	0.325208	0.374435	0.440357	0.328777	0.329678	0.319941	0.334463	0.341056	0.315075	0.342244	0.35441	0.398098	0.589199	0.358212
	4.76298	0.32146	0.336809	0.314078	0.312871	0.340958	0.317021	0.300677	0.34102	0.328327	0.356667	0.385318	0.389637	0.420691	0.309596	0.441584	0.330359	0.389741	0.473364	0.394097	0.364852	0.462007	0.371354	0.288106	0.367218	0.330734	0.423611	0.325978	0.302283	0.358566	0.303532	0.44766	0.298984	0.321355	0.441246	0.321883	0.368539	0.466113	0.312239	0.31733	0.318362	0.338114	0.342018	0.311285	0.332271	0.346894	0.390537	0.571045	0.362018
	4.79628	0.325553	0.342979	0.312876	0.327879	0.329313	0.320533	0.29261	0.340441	0.33114	0.355649	0.382629	0.396435	0.422052	0.315981	0.428606	0.332894	0.401854	0.466734	0.393805	0.356124	0.468397	0.359536	0.298159	0.381742	0.331266	0.435437	0.329371	0.296526	0.365343	0.303477	0.454955	0.30395	0.315404	0.436057	0.327248	0.368847	0.459757	0.320834	0.326862	0.320612	0.328201	0.337425	0.321949	0.337275	0.342456	0.396511	0.569093	0.362494
	4.82965	0.324543	0.341293	0.319407	0.326368	0.33472	0.311634	0.300951	0.335939	0.333913	0.347091	0.390778	0.401167	0.41187	0.316599	0.436919	0.338069	0.394488	0.472296	0.398477	0.377883	0.453161	0.372381	0.302751	0.373798	0.323221	0.423689	0.331992	0.308776	0.354615	0.306526	0.448669	0.293593	0.318267	0.450579	0.326526	0.368938	0.44253	0.321588	0.319372	0.314719	0.31725	0.333636	0.316383	0.350338	0.35019	0.381958	0.549712	0.359509
	4.86295	0.332848	0.340529	0.31751	0.335129	0.331205	0.311642	0.298897	0.335793	0.331012	0.351911	0.386331	0.3962	0.414929	0.318183	0.420414	0.337687	0.393421	0.46868	0.410875	0.367817	0.471663	0.368284	0.309203	0.369497	0.333243	0.425627	0.325685	0.302152	0.364851	0.293882	0.429901	0.295121	0.315274	0.447104	0.324714	0.365139	0.452394	0.333026	0.323158	0.317664	0.31326	0.337051	0.318115	0.346771	0.334509	0.379354	0.543606	0.350683
	4.89628	0.324597	0.334384	0.316007	0.321982	0.328578	0.299432	0.297025	0.331992	0.314924	0.351726	0.379764	0.382188	0.405008	0.312682	0.42053	0.337649	0.391151	0.471984	0.383072	0.360339	0.437426	0.353554	0.300267	0.376427	0.317759	0.421353	0.316522	0.299559	0.355194	0.316309	0.433798	0.293692	0.315782	0.443262	0.318291	0.356402	0.436417	0.314717	0.324498	0.321588	0.32739	0.330539	0.313124	0.34128	0.339908	0.381097	0.535384	0.355784
	4.92962	0.326387	0.338424	0.314536	0.328529	0.336134	0.321538	0.297382	0.340747	0.329522	0.351285	0.387114	0.384535	0.410779	0.320018	0.416416	0.336725	0.392306	0.469375	0.385138	0.375726	0.455708	0.360934	0.304965	0.368697	0.320392	0.419217	0.325009	0.302868	0.349779	0.313228	0.442702	0.295642	0.321473	0.451794	0.325525	0.357807	0.457333	0.322358	0.318521	0.319604	0.325968	0.330192	0.312789	0.319512	0.342073	0.383369	0.518851	0.355863
	4.96297	0.326954	0.336109	0.31015	0.313802	0.338944	0.304102	0.299092	0.338818	0.330995	0.350287	0.379041	0.380963	0.384876	0.315296	0.425708	0.336732	0.39221	0.463516	0.379256	0.345837	0.44718	0.36135	0.312375	0.369866	0.329064	0.418928	0.316677	0.302741	0.35273	0.314778	0.432051	0.304083	0.321488	0.452735	0.315167	0.361008	0.467375	0.322415	0.319322	0.329954	0.330799	0.329887	0.316942	0.324712	0.330463	0.385814	0.51515	0.352947
	4.99627	0.323713	0.332168	0.316975	0.319687	0.340033	0.314315	0.290291	0.330168	0.327707	0.351164	0.374452	0.38826	0.410056	0.321469	0.419557	0.32831	0.388236	0.456922	0.3781	0.353616	0.440824	0.36008	0.305717	0.358154	0.329598	0.413028	0.31543	0.305281	0.344519	0.304124	0.447284	0.290859	0.314022	0.42856	0.318206	0.357956	0.45917	0.320082	0.320693	0.315701	0.315541	0.33156	0.311956	0.33406	0.329956	0.384791	0.508129	0.362465
	5.02962	0.322576	0.346989	0.30888	0.329065	0.337539	0.313692	0.2971	0.334907	0.329506	0.354894	0.375472	0.376482	0.396755	0.318105	0.416978	0.338475	0.384316	0.443423	0.368984	0.350125	0.432776	0.359416	0.304618	0.358657	0.32617	0.410066	0.315588	0.298286	0.343504	0.317556	0.434684	0.296178	0.315081	0.446188	0.318439	0.357848	0.455304	0.333489	0.317348	0.331598	0.339508	0.327385	0.326207	0.325162	0.351999	0.38224	0.511484	0.347363
	5.06295	0.328878	0.341918	0.314092	0.317977	0.336259	0.311653	0.291339	0.333074	0.327282	0.349794	0.376539	0.384992	0.409969	0.306437	0.41786	0.334287	0.383688	0.454412	0.36175	0.341137	0.44291	0.363594	0.311987	0.35166	0.329102	0.403088	0.3144	0.304926	0.335981	0.311804	0.435978	0.291019	0.314117	0.439598	0.318562	0.337832	0.459365	0.306335	0.31157	0.31856	0.311977	0.333833	0.322459	0.326597	0.337217	0.37996	0.528112	0.357468
	5.09627	0.331775	0.338846	0.301681	0.324126	0.335979	0.3089	0.298516	0.327481	0.330958	0.344016	0.363957	0.376919	0.38672	0.312984	0.419731	0.325828	0.382775	0.459223	0.35636	0.349126	0.440102	0.34514	0.301891	0.360359	0.33159	0.408672	0.314956	0.298829	0.344047	0.309942	0.421206	0.297388	0.315622	0.420873	0.320768	0.358726	0.453372	0.319628	0.319762	0.310642	0.332751	0.326226	0.315869	0.316977	0.330101	0.369502	0.507258	0.349021
	5.12963	0.327761	0.339136	0.311574	0.33106	0.329787	0.310806	0.303371	0.331488	0.317695	0.345151	0.358521	0.374505	0.377919	0.324371	0.401143	0.331065	0.375922	0.446379	0.37944	0.360586	0.435813	0.358313	0.307635	0.353345	0.323347	0.4029	0.313148	0.304128	0.339803	0.315691	0.442685	0.297456	0.317902	0.415258	0.318536	0.361855	0.418539	0.344989	0.309518	0.324096	0.326552	0.328888	0.312678	0.316511	0.335329	0.36895	0.507306	0.357134
	5.16297	0.328324	0.340909	0.313572	0.320028	0.32909	0.309034	0.301283	0.337455	0.322876	0.344278	0.360081	0.378674	0.383299	0.31517	0.405008	0.339253	0.373191	0.459278	0.363073	0.34354	0.447426	0.337733	0.305948	0.356549	0.317076	0.397804	0.314415	0.303615	0.346314	0.292775	0.421892	0.290616	0.317972	0.425234	0.316531	0.35956	0.438051	0.321225	0.30654	0.316716	0.34013	0.330045	0.316297	0.32161	0.337884	0.371655	0.48183	0.355562
	5.19627	0.334184	0.33533	0.315645	0.317999	0.334717	0.313459	0.296228	0.33682	0.315027	0.347565	0.351963	0.357927	0.380807	0.30886	0.403778	0.331386	0.381013	0.439181	0.363691	0.342082	0.431646	0.347602	0.309617	0.350186	0.323479	0.390165	0.31391	0.302763	0.33114	0.303671	0.425628	0.299313	0.308748	0.407981	0.318655	0.346177	0.420489	0.323759	0.307306	0.318941	0.317668	0.328476	0.319437	0.336378	0.328017	0.372302	0.493982	0.351317
	5.22962	0.337563	0.349471	0.311259	0.324082	0.337346	0.309891	0.303789	0.346856	0.333454	0.350178	0.362536	0.373715	0.380994	0.318894	0.406227	0.3345	0.378071	0.432142	0.369202	0.355767	0.445793	0.350851	0.304398	0.359777	0.335175	0.40371	0.305971	0.305962	0.339114	0.322265	0.420804	0.290933	0.317906	0.423228	0.32682	0.347818	0.456727	0.317794	0.310819	0.328998	0.310794	0.326362	0.312763	0.323505	0.331588	0.388933	0.491747	0.352014
	5.26295	0.321274	0.34581	0.310023	0.314226	0.33611	0.310204	0.296766	0.331168	0.31703	0.35057	0.353808	0.361443	0.383245	0.299093	0.396392	0.330626	0.364546	0.40477	0.358911	0.32439	0.439511	0.339439	0.305175	0.360481	0.315957	0.38353	0.323201	0.300745	0.341992	0.301423	0.419933	0.294335	0.315237	0.414609	0.325893	0.334818	0.416452	0.319504	0.3051	0.314284	0.322836	0.320326	0.321536	0.317929	0.328947	0.374811	0.491677	0.348755
	5.29628	0.328433	0.340624	0.316659	0.319762	0.340019	0.316771	0.299897	0.33735	0.323971	0.362438	0.351827	0.363679	0.378013	0.316806	0.399545	0.333385	0.373662	0.403041	0.36282	0.331787	0.430527	0.350461	0.305955	0.353907	0.331976	0.392933	0.313965	0.294025	0.329956	0.311959	0.419226	0.302046	0.316942	0.424765	0.320634	0.344771	0.429556	0.330121	0.312085	0.312407	0.320318	0.322339	0.309611	0.331726	0.336864	0.368083	0.46573	0.347927
	5.32962	0.331402	0.337044	0.311884	0.313543	0.34156	0.305118	0.294868	0.330607	0.317724	0.359092	0.372689	0.369929	0.379173	0.315328	0.40195	0.33735	0.362619	0.40775	0.345728	0.35721	0.437809	0.341437	0.298586	0.347775	0.325975	0.391759	0.312918	0.301237	0.32916	0.300571	0.420412	0.310314	0.317329	0.411233	0.31972	0.334769	0.418267	0.328937	0.308043	0.316479	0.321108	0.321106	0.314599	0.32284	0.336687	0.362525	0.465018	0.354936
	5.36295	0.328732	0.341128	0.311028	0.321646	0.33926	0.301573	0.296269	0.3301	0.312593	0.351423	0.351452	0.368799	0.369879	0.325821	0.393438	0.332487	0.363987	0.409725	0.355642	0.338237	0.414611	0.336112	0.306583	0.344544	0.324321	0.388245	0.313875	0.301921	0.350303	0.300892	0.397618	0.293381	0.311037	0.411071	0.324761	0.338721	0.40029	0.322224	0.311155	0.321549	0.314639	0.319621	0.313061	0.326709	0.321709	0.365276	0.457129	0.34839
	5.39628	0.328063	0.339409	0.307029	0.320001	0.331888	0.315483	0.291668	0.330936	0.321545	0.347517	0.351601	0.374514	0.368854	0.315344	0.391457	0.330056	0.360829	0.3827	0.33245	0.334922	0.416864	0.343857	0.302	0.345116	0.326051	0.389487	0.30745	0.300113	0.329855	0.318133	0.403473	0.294834	0.314897	0.404691	0.305892	0.345152	0.40524	0.313321	0.306909	0.314695	0.32345	0.315299	0.311816	0.31953	0.323616	0.362134	0.444826	0.35126
	5.42967	0.329177	0.338605	0.307027	0.313195	0.334359	0.316349	0.290663	0.337191	0.321812	0.353766	0.347942	0.362067	0.373392	0.311072	0.390215	0.332594	0.36348	0.388019	0.350671	0.33305	0.411212	0.338373	0.309278	0.339716	0.321507	0.382808	0.304209	0.299124	0.335106	0.29762	0.407089	0.302165	0.31537	0.402964	0.325459	0.352869	0.440074	0.323558	0.319405	0.319124	0.337336	0.31985	0.315107	0.322222	0.334545	0.372953	0.460682	0.352703
	5.46298	0.332261	0.336943	0.296242	0.318522	0.345791	0.301055	0.295421	0.323501	0.313213	0.342684	0.349894	0.359491	0.373758	0.308116	0.391079	0.333091	0.366592	0.392115	0.342123	0.343797	0.414517	0.321386	0.310332	0.335296	0.314671	0.378049	0.307545	0.3042	0.338727	0.300719	0.405553	0.304152	0.317991	0.40843	0.310783	0.341073	0.425023	0.315034	0.30622	0.322377	0.33382	0.319822	0.325318	0.332339	0.32307	0.35614	0.458308	0.354511
	5.4963	0.327645	0.332646	0.311243	0.32755	0.329547	0.309414	0.29221	0.327124	0.310425	0.351493	0.349534	0.37022	0.361848	0.315603	0.376965	0.33558	0.350927	0.378555	0.335468	0.325254	0.397607	0.335885	0.304399	0.335001	0.316462	0.373357	0.302926	0.303073	0.317744	0.309776	0.394888	0.295829	0.317774	0.406562	0.326978	0.320508	0.416531	0.329685	0.300131	0.321006	0.319019	0.319967	0.308834	0.318556	0.31776	0.360957	0.441913	0.353827
	5.52962	0.329451	0.336971	0.301735	0.319854	0.331037	0.304736	0.299499	0.332387	0.323047	0.352886	0.346785	0.366363	0.362612	0.31081	0.397489	0.330693	0.347303	0.370844	0.323728	0.333617	0.403076	0.33208	0.311131	0.337249	0.314472	0.366706	0.308345	0.301006	0.329447	0.310919	0.395328	0.295823	0.314288	0.391914	0.316271	0.324763	0.396029	0.320281	0.31269	0.326372	0.31365	0.322706	0.316342	0.324236	0.319191	0.352514	0.43052	0.34374
	5.56297	0.328887	0.332588	0.319387	0.327617	0.335136	0.32133	0.300209	0.33759	0.322988	0.358285	0.351122	0.354334	0.364198	0.315232	0.389037	0.335424	0.362932	0.367162	0.343408	0.334079	0.406422	0.32927	0.300158	0.341119	0.306443	0.38792	0.305235	0.303846	0.326834	0.294532	0.400939	0.291958	0.308751	0.396017	0.312825	0.331997	0.406184	0.301044	0.309896	0.32886	0.327017	0.320022	0.32157	0.324331	0.326746	0.343659	0.415499	0.347362
	5.5963	0.330547	0.336381	0.311728	0.318216	0.334768	0.310573	0.303098	0.332688	0.32845	0.341775	0.339994	0.354343	0.372545	0.317786	0.388626	0.344124	0.357071	0.36597	0.328631	0.32659	0.387021	0.34085	0.31401	0.347452	0.330505	0.369182	0.299247	0.301709	0.327761	0.29766	0.399476	0.299973	0.31934	0.393168	0.318865	0.323883	0.417992	0.322507	0.302791	0.324076	0.34121	0.315717	0.318601	0.323774	0.322735	0.358798	0.436956	0.347016
	5.62962	0.33325	0.333933	0.30467	0.321867	0.348481	0.319532	0.299832	0.328114	0.318303	0.360616	0.342094	0.35551	0.36323	0.312735	0.380598	0.337654	0.359653	0.369666	0.339165	0.313031	0.398279	0.339356	0.30454	0.335992	0.3221	0.367687	0.307758	0.301988	0.320006	0.309058	0.402717	0.298312	0.310023	0.403893	0.323755	0.330512	0.401393	0.327764	0.308028	0.324263	0.32189	0.314808	0.315323	0.312177	0.328256	0.363675	0.417319	0.342604
	5.66295	0.33111	0.334156	0.304311	0.320415	0.329713	0.314014	0.297931	0.341358	0.311741	0.344438	0.337293	0.345014	0.3621	0.318129	0.37378	0.335561	0.356333	0.363296	0.33461	0.328078	0.379007	0.332577	0.304778	0.336969	0.327703	0.367004	0.299821	0.307857	0.327732	0.310826	0.38181	0.284887	0.317725	0.397218	0.3126	0.321647	0.393736	0.321448	0.298133	0.320013	0.329894	0.323631	0.315798	0.319388	0.323596	0.353862	0.420297	0.34888
	5.69628	0.327546	0.332938	0.300818	0.331271	0.335635	0.308092	0.296379	0.331851	0.315334	0.356374	0.345247	0.361239	0.360148	0.313886	0.368855	0.340338	0.357771	0.364266	0.342405	0.33016	0.387669	0.337206	0.311244	0.347812	0.336986	0.368756	0.313646	0.304687	0.325675	0.303182	0.389383	0.289556	0.316181	0.408118	0.310448	0.31614	0.401485	0.314427	0.299285	0.318916	0.337691	0.317199	0.313052	0.328133	0.313039	0.354411	0.40738	0.354287
	5.72963	0.332013	0.338095	0.308013	0.323409	0.329102	0.314684	0.30065	0.338551	0.321621	0.352916	0.332402	0.357306	0.351931	0.314305	0.366377	0.337836	0.355481	0.363787	0.3277	0.325997	0.391442	0.331924	0.30215	0.330051	0.322026	0.361435	0.304882	0.301813	0.330389	0.303325	0.391759	0.304901	0.313019	0.405034	0.314816	0.325173	0.396671	0.317683	0.302731	0.321445	0.325408	0.312309	0.322001	0.306165	0.321677	0.348531	0.404628	0.351135
	5.76295	0.331469	0.339334	0.309394	0.321225	0.340693	0.315993	0.295858	0.334912	0.315009	0.361617	0.340284	0.351851	0.35828	0.313719	0.369334	0.331891	0.361977	0.345592	0.320761	0.343413	0.38486	0.319158	0.302645	0.339825	0.333099	0.367372	0.301371	0.308513	0.323106	0.316109	0.396755	0.285443	0.319547	0.401413	0.31151	0.329745	0.393302	0.322417	0.305696	0.323406	0.324249	0.320079	0.320029	0.309178	0.32369	0.345304	0.397736	0.347789
	5.79623	0.329937	0.329991	0.316352	0.327191	0.335784	0.305079	0.286546	0.33418	0.325443	0.349979	0.337931	0.351497	0.357101	0.314943	0.365988	0.331936	0.357561	0.356163	0.326149	0.328399	0.387359	0.32631	0.308602	0.333867	0.320766	0.36749	0.302151	0.299268	0.319899	0.311206	0.381384	0.289991	0.317931	0.390417	0.315797	0.321742	0.401212	0.343149	0.309293	0.313773	0.33709	0.322402	0.312478	0.317122	0.323887	0.352652	0.409875	0.345358
	5.82962	0.321575	0.340685	0.303415	0.320814	0.328548	0.306667	0.292071	0.331619	0.316766	0.342349	0.343403	0.352325	0.349826	0.317551	0.374512	0.331091	0.349497	0.347625	0.334991	0.34334	0.375112	0.317687	0.304293	0.332309	0.300039	0.366871	0.308303	0.292148	0.318522	0.311656	0.389621	0.295092	0.310423	0.395777	0.305421	0.338944	0.397635	0.320822	0.309658	0.326509	0.333468	0.315406	0.313368	0.319535	0.316278	0.346186	0.397903	0.348932
	5.86295	0.32689	0.330178	0.302282	0.322394	0.321578	0.309173	0.290766	0.337112	0.319623	0.34954	0.341191	0.340776	0.350444	0.311936	0.35995	0.33176	0.347774	0.342396	0.31997	0.31397	0.372648	0.320472	0.299927	0.32046	0.314496	0.351914	0.299691	0.295846	0.315558	0.307436	0.382643	0.300591	0.316381	0.388326	0.31703	0.329414	0.366075	0.317532	0.298876	0.320531	0.326249	0.312336	0.320187	0.306212	0.322735	0.334918	0.393756	0.342833
	5.89627	0.327133	0.328266	0.300301	0.31442	0.332551	0.298564	0.287913	0.332958	0.318182	0.356289	0.328619	0.341615	0.346342	0.312643	0.354504	0.334708	0.340251	0.339549	0.322645	0.324838	0.372508	0.323667	0.303499	0.334311	0.318242	0.353394	0.295052	0.303439	0.321605	0.301106	0.371354	0.297121	0.308982	0.399446	0.31964	0.323248	0.379522	0.332211	0.298588	0.312821	0.327772	0.314839	0.307999	0.305209	0.321292	0.337218	0.380373	0.346078
	5.92958	0.317351	0.335138	0.30268	0.319873	0.32959	0.304281	0.292305	0.339881	0.309036	0.353587	0.332356	0.34997	0.346403	0.319782	0.361788	0.335268	0.345722	0.342654	0.32414	0.33005	0.378196	0.321705	0.305087	0.329457	0.315162	0.354712	0.302731	0.291938	0.315686	0.301965	0.384569	0.281972	0.308946	0.399975	0.317789	0.327359	0.397194	0.318853	0.306099	0.31497	0.314428	0.310215	0.312123	0.32304	0.319897	0.343254	0.387326	0.343739
	5.96295	0.32353	0.331114	0.301404	0.319163	0.337154	0.307848	0.290199	0.328132	0.307793	0.346112	0.337477	0.335505	0.337611	0.315217	0.346423	0.332284	0.350244	0.331051	0.318335	0.340294	0.382642	0.328084	0.312673	0.326651	0.329537	0.341089	0.299508	0.297121	0.317708	0.314539	0.370244	0.285923	0.317287	0.381039	0.305921	0.322436	0.364182	0.314123	0.30311	0.331311	0.327482	0.314497	0.314586	0.311542	0.317081	0.335295	0.379177	0.34703
	5.99627	0.325805	0.332326	0.309897	0.319946	0.338525	0.312353	0.29094	0.333824	0.314041	0.341557	0.327138	0.345516	0.337222	0.323324	0.363295	0.332346	0.347436	0.331379	0.318791	0.336724	0.38087	0.3235	0.310195	0.325212	0.332501	0.345696	0.29881	0.296633	0.322869	0.309489	0.368002	0.297963	0.316112	0.384972	0.31568	0.334746	0.386514	0.319033	0.299996	0.322244	0.325026	0.311115	0.314207	0.310563	0.313061	0.332856	0.379872	0.349507
	6.0296	0.326566	0.329882	0.308696	0.317585	0.338624	0.314925	0.302522	0.323078	0.313001	0.343495	0.333822	0.340495	0.341856	0.314179	0.345081	0.330055	0.336627	0.336406	0.324013	0.3434	0.358842	0.323487	0.288462	0.311144	0.326348	0.338631	0.301841	0.303649	0.315415	0.310273	0.369388	0.296651	0.307425	0.385369	0.313928	0.3162	0.36934	0.32066	0.302895	0.310553	0.311124	0.306657	0.315578	0.31497	0.32005	0.334817	0.379194	0.354438
	6.06295	0.333624	0.339146	0.320092	0.318702	0.332604	0.316651	0.302077	0.329711	0.317821	0.340478	0.33791	0.343712	0.350249	0.321868	0.350727	0.334179	0.345725	0.33883	0.320069	0.336256	0.38955	0.323707	0.318958	0.322752	0.323188	0.347392	0.303773	0.302257	0.328859	0.306207	0.38547	0.293313	0.315452	0.38919	0.329458	0.324203	0.385485	0.32797	0.300679	0.319272	0.320167	0.306919	0.312696	0.322465	0.309634	0.338682	0.38161	0.348775
	6.0963	0.327975	0.327469	0.303814	0.3167	0.335396	0.30149	0.291643	0.324109	0.308906	0.347117	0.334686	0.333749	0.338863	0.327578	0.353491	0.331576	0.34283	0.32679	0.32075	0.335618	0.368987	0.31751	0.312641	0.324292	0.327824	0.342699	0.289679	0.290013	0.316772	0.310332	0.362473	0.290488	0.309953	0.380005	0.3145	0.317277	0.363369	0.307433	0.303815	0.310346	0.328356	0.312103	0.312578	0.31909	0.319243	0.328621	0.373128	0.345716
	6.12962	0.326985	0.330607	0.310515	0.329675	0.321913	0.30071	0.293666	0.330277	0.320151	0.350968	0.321586	0.333764	0.340613	0.305164	0.356546	0.331269	0.348289	0.334719	0.303459	0.356131	0.37814	0.31228	0.305595	0.32729	0.326345	0.34871	0.313418	0.301232	0.308931	0.30908	0.361784	0.298836	0.315799	0.387774	0.313664	0.318171	0.36201	0.334544	0.296669	0.310389	0.317625	0.313138	0.315988	0.310563	0.316873	0.32986	0.363637	0.345364
	6.16298	0.322117	0.33134	0.305914	0.321684	0.344754	0.309062	0.301301	0.330835	0.319396	0.341312	0.33165	0.341843	0.340681	0.307196	0.344127	0.334136	0.340984	0.342766	0.315169	0.318694	0.36157	0.31668	0.306019	0.315691	0.336499	0.348788	0.305183	0.307717	0.324631	0.311184	0.372669	0.293901	0.316718	0.387956	0.31444	0.315798	0.370412	0.311746	0.301499	0.330298	0.322509	0.313903	0.306876	0.311079	0.306738	0.330897	0.361354	0.343201
	6.19628	0.334175	0.337068	0.311385	0.323006	0.328203	0.307129	0.30465	0.332157	0.318168	0.337492	0.333438	0.345073	0.34007	0.31288	0.35029	0.333019	0.349785	0.326744	0.321446	0.328193	0.369314	0.311664	0.298146	0.313696	0.329416	0.346116	0.309998	0.297982	0.308424	0.312412	0.363346	0.300762	0.319611	0.382252	0.312577	0.323329	0.360948	0.32483	0.300386	0.316611	0.327665	0.316758	0.318388	0.320149	0.314726	0.330481	0.361898	0.350187
	6.22962	0.324913	0.33311	0.307058	0.322453	0.331036	0.299569	0.294591	0.33523	0.316006	0.352778	0.326799	0.330868	0.338527	0.307937	0.341916	0.334459	0.3416	0.335763	0.312118	0.331437	0.376692	0.311489	0.312273	0.324523	0.327867	0.348656	0.29611	0.300561	0.325208	0.315278	0.358669	0.300522	0.311719	0.380548	0.311136	0.315645	0.376532	0.321156	0.30371	0.313665	0.326251	0.312734	0.31961	0.323054	0.310927	0.325704	0.367675	0.350851
	6.26293	0.327419	0.334826	0.306391	0.311309	0.335085	0.297176	0.288427	0.334461	0.316435	0.350772	0.330473	0.337442	0.337342	0.32055	0.334116	0.334163	0.34651	0.322694	0.316595	0.329825	0.365048	0.31524	0.29627	0.317074	0.333645	0.337183	0.29169	0.295926	0.309603	0.314644	0.361744	0.298114	0.308376	0.384985	0.313975	0.323784	0.379149	0.321091	0.306025	0.321219	0.326996	0.310428	0.316292	0.309067	0.323897	0.32761	0.347486	0.344524
	6.2963	0.328315	0.329422	0.307893	0.327989	0.331745	0.297689	0.295293	0.32798	0.314747	0.341424	0.324822	0.327392	0.331429	0.298234	0.349356	0.332841	0.342927	0.325993	0.307851	0.333726	0.364145	0.325528	0.30245	0.326719	0.328014	0.34207	0.292812	0.299906	0.320014	0.32067	0.347744	0.290023	0.312351	0.374945	0.316977	0.311673	0.368823	0.314616	0.309302	0.328736	0.326685	0.313294	0.314776	0.303784	0.310756	0.32693	0.348472	0.346721
	6.3296	0.324861	0.334915	0.311288	0.322961	0.326739	0.298306	0.301008	0.333419	0.313781	0.349664	0.328633	0.328302	0.333383	0.313836	0.342252	0.337027	0.339576	0.329712	0.316048	0.342424	0.362994	0.31047	0.317073	0.323895	0.336836	0.329583	0.297526	0.304066	0.321074	0.300007	0.358233	0.288352	0.311452	0.386708	0.309113	0.315481	0.35604	0.32169	0.301279	0.314612	0.329034	0.315029	0.312022	0.313193	0.314414	0.325029	0.374101	0.348154
	6.3629	0.331148	0.335115	0.312335	0.328019	0.343615	0.31967	0.294505	0.330836	0.320353	0.359312	0.327547	0.329728	0.323604	0.315119	0.335048	0.343566	0.337429	0.31665	0.32361	0.334443	0.358213	0.332844	0.298902	0.319637	0.329142	0.333008	0.299981	0.298086	0.313541	0.311692	0.366365	0.290089	0.317452	0.388345	0.319005	0.326147	0.338874	0.311822	0.310117	0.327295	0.327053	0.30694	0.316843	0.324342	0.3221	0.321246	0.366833	0.346819
	6.39628	0.316784	0.331191	0.301123	0.311417	0.329128	0.29551	0.295884	0.323576	0.323156	0.350639	0.330389	0.329598	0.334522	0.321517	0.331112	0.336345	0.327252	0.323972	0.310084	0.334051	0.363691	0.316698	0.2994	0.32983	0.324722	0.33836	0.300254	0.300657	0.300512	0.307806	0.358157	0.291379	0.313524	0.387284	0.310078	0.331327	0.323795	0.335667	0.300443	0.318928	0.314966	0.314816	0.318548	0.307371	0.30983	0.33	0.349192	0.347916
	6.42963	0.325701	0.333035	0.306102	0.315009	0.341324	0.30362	0.288605	0.324765	0.324813	0.346298	0.322737	0.332396	0.336724	0.313396	0.338188	0.320224	0.337443	0.315088	0.317691	0.326471	0.356031	0.315071	0.293453	0.319801	0.33245	0.336388	0.296193	0.295612	0.303415	0.308636	0.35446	0.301679	0.31661	0.375634	0.30647	0.334444	0.352491	0.336719	0.306192	0.321622	0.325958	0.306379	0.314343	0.308686	0.314186	0.327965	0.347372	0.345335
	6.463	0.324135	0.333769	0.305225	0.319056	0.328803	0.297562	0.299401	0.323126	0.31079	0.352759	0.326351	0.333277	0.337746	0.312273	0.329756	0.335461	0.334156	0.324804	0.29507	0.330757	0.367061	0.308678	0.294328	0.319064	0.337094	0.329926	0.287127	0.298785	0.310591	0.307571	0.353171	0.289192	0.306578	0.372578	0.310162	0.308089	0.376962	0.321942	0.30142	0.317916	0.31608	0.305927	0.31974	0.313953	0.31792	0.31763	0.347332	0.341082
	6.49625	0.329683	0.327576	0.302375	0.315703	0.325921	0.310847	0.297596	0.322421	0.317004	0.351295	0.333311	0.32726	0.338071	0.313114	0.328767	0.333034	0.333393	0.310899	0.295111	0.334999	0.361432	0.306808	0.295651	0.324567	0.337149	0.332939	0.295413	0.301831	0.302954	0.295447	0.348702	0.300036	0.310617	0.3794	0.30409	0.326398	0.341605	0.340288	0.298084	0.325366	0.308712	0.316715	0.318368	0.305578	0.308973	0.318462	0.349197	0.339478
	6.52957	0.328504	0.330418	0.312149	0.316867	0.338344	0.305217	0.295713	0.32593	0.317643	0.339307	0.322914	0.323185	0.347315	0.31273	0.326271	0.337429	0.332638	0.312071	0.306543	0.337246	0.34354	0.317697	0.305657	0.321605	0.32218	0.32021	0.293064	0.296047	0.309015	0.292759	0.347462	0.29386	0.31935	0.379893	0.317279	0.314465	0.345384	0.332702	0.303509	0.331274	0.326291	0.312264	0.309864	0.312	0.313034	0.320382	0.351666	0.338824
	6.56292	0.328508	0.333557	0.312252	0.313897	0.339506	0.304669	0.298212	0.325388	0.317279	0.347228	0.336662	0.331134	0.334163	0.319055	0.332948	0.333751	0.332223	0.3076	0.325333	0.321343	0.358511	0.31203	0.303363	0.331097	0.328039	0.324436	0.307572	0.292612	0.314761	0.30323	0.357574	0.297025	0.312795	0.378252	0.312657	0.326325	0.346512	0.323129	0.297486	0.324843	0.31593	0.316173	0.311436	0.309122	0.317637	0.314319	0.339295	0.343963
	6.59628	0.32661	0.324269	0.304406	0.312487	0.331804	0.300754	0.303036	0.327023	0.319329	0.344329	0.325376	0.336493	0.339701	0.307256	0.321519	0.33604	0.327918	0.312387	0.307656	0.321741	0.357252	0.319991	0.297322	0.325532	0.333005	0.325714	0.300405	0.304535	0.306372	0.302175	0.354771	0.292958	0.305253	0.384716	0.310603	0.30297	0.360264	0.330229	0.301868	0.311043	0.325898	0.311821	0.317463	0.312081	0.312982	0.315914	0.3389	0.355509
	6.62957	0.329706	0.331597	0.309977	0.313712	0.345481	0.296923	0.296988	0.322729	0.316083	0.34497	0.319798	0.323439	0.328711	0.31594	0.325901	0.333291	0.335157	0.323201	0.300302	0.331946	0.343987	0.31064	0.296147	0.322645	0.332611	0.325914	0.29584	0.299798	0.314616	0.300045	0.349679	0.29864	0.310578	0.374257	0.314677	0.340516	0.347748	0.314294	0.30089	0.327268	0.33212	0.308717	0.309229	0.304579	0.308337	0.317969	0.332503	0.342543
	6.66295	0.326358	0.327677	0.311402	0.315576	0.329885	0.305514	0.303538	0.331278	0.314022	0.354446	0.322826	0.339224	0.334075	0.318363	0.342648	0.338414	0.336486	0.315663	0.290864	0.345135	0.351664	0.314111	0.30377	0.322344	0.331342	0.320701	0.300918	0.296765	0.319108	0.312831	0.348937	0.28602	0.314066	0.372074	0.32349	0.319156	0.355889	0.338573	0.316128	0.316136	0.321547	0.315384	0.317129	0.307682	0.320802	0.31708	0.348652	0.344684
	6.6963	0.328364	0.33155	0.310602	0.31797	0.328402	0.298332	0.30151	0.321196	0.315587	0.347251	0.335883	0.322532	0.31702	0.309657	0.322985	0.338246	0.339312	0.317821	0.293549	0.332872	0.341763	0.319252	0.301768	0.318676	0.336575	0.320727	0.301002	0.298612	0.313462	0.316991	0.346698	0.286383	0.302886	0.381588	0.304577	0.334734	0.340132	0.327595	0.299973	0.321083	0.314674	0.311206	0.319909	0.30231	0.31478	0.30857	0.335761	0.347964
	6.7296	0.329378	0.329894	0.308199	0.31743	0.332944	0.300497	0.298765	0.330491	0.313961	0.354383	0.324603	0.331691	0.325364	0.31843	0.336507	0.338724	0.342138	0.314366	0.30119	0.337268	0.352497	0.305835	0.310282	0.317327	0.338327	0.32668	0.293926	0.303136	0.307329	0.315211	0.348309	0.294266	0.318029	0.380337	0.313604	0.305756	0.336826	0.308903	0.303852	0.324079	0.327451	0.313422	0.313361	0.307507	0.303525	0.313392	0.341874	0.350152
	6.76295	0.336378	0.329788	0.314608	0.317522	0.342293	0.308939	0.303157	0.330408	0.320382	0.352719	0.335271	0.32695	0.333064	0.31092	0.328702	0.340536	0.337087	0.320987	0.297663	0.352635	0.332736	0.312959	0.297483	0.318666	0.339075	0.322446	0.309085	0.301961	0.303065	0.305344	0.35202	0.295365	0.310209	0.391395	0.323883	0.309377	0.352278	0.314207	0.306322	0.334761	0.322625	0.313539	0.321333	0.30511	0.314727	0.319173	0.339133	0.343069
	6.7963	0.332968	0.327517	0.30718	0.32353	0.340673	0.301383	0.308138	0.329615	0.315727	0.3496	0.334131	0.335502	0.338386	0.321636	0.334736	0.339554	0.339924	0.312742	0.300081	0.342003	0.34124	0.319884	0.307605	0.32546	0.326998	0.319279	0.300426	0.298752	0.311603	0.303548	0.347438	0.297888	0.31592	0.392232	0.315865	0.313523	0.353861	0.319465	0.312487	0.325381	0.330783	0.316292	0.315587	0.313519	0.319144	0.32074	0.338581	0.343401
	6.82965	0.33185	0.328693	0.308259	0.327474	0.322158	0.309288	0.304955	0.327268	0.306102	0.350325	0.329808	0.32512	0.342403	0.304553	0.325138	0.339068	0.327751	0.314531	0.302293	0.330977	0.353433	0.317012	0.303127	0.318093	0.329912	0.325366	0.297083	0.300934	0.301434	0.325039	0.34331	0.294058	0.309768	0.374777	0.315604	0.305958	0.347301	0.328584	0.303076	0.321155	0.318801	0.31385	0.313046	0.314545	0.315062	0.311502	0.332788	0.346068
	6.86297	0.325179	0.326522	0.308565	0.313435	0.334902	0.309391	0.297281	0.322645	0.32333	0.341643	0.330834	0.330004	0.331337	0.313484	0.333477	0.331324	0.332628	0.318766	0.310103	0.330003	0.343817	0.305024	0.30043	0.297801	0.326692	0.307304	0.303006	0.308587	0.313054	0.298628	0.345515	0.288965	0.314959	0.382562	0.31945	0.292385	0.330793	0.315232	0.302739	0.305654	0.329344	0.304011	0.308756	0.307117	0.31555	0.310904	0.329306	0.346716
	6.8963	0.332589	0.325746	0.306583	0.318018	0.339388	0.305489	0.298264	0.322526	0.319748	0.343885	0.3332	0.324325	0.337096	0.311435	0.325024	0.332897	0.338509	0.313654	0.300927	0.334478	0.3366	0.316544	0.302061	0.323128	0.337318	0.319984	0.307156	0.296675	0.311205	0.301373	0.342767	0.301878	0.317202	0.374521	0.308318	0.322713	0.348607	0.329289	0.306085	0.339195	0.323046	0.311838	0.311045	0.311947	0.308654	0.303332	0.333294	0.344478
	6.92962	0.32241	0.327381	0.310522	0.317083	0.337552	0.307577	0.295068	0.33014	0.30969	0.336733	0.326679	0.323574	0.341541	0.307276	0.327985	0.340846	0.328379	0.318247	0.29103	0.341987	0.337472	0.313331	0.30011	0.3172	0.327648	0.310852	0.299631	0.297231	0.308177	0.314566	0.349848	0.29826	0.313886	0.38151	0.318495	0.310659	0.318054	0.329823	0.307983	0.322566	0.332721	0.30989	0.310056	0.300164	0.305396	0.310666	0.323787	0.345934
	6.96295	0.326525	0.325271	0.307557	0.326415	0.341096	0.292905	0.295277	0.321837	0.310215	0.359972	0.332902	0.330161	0.333699	0.313914	0.315493	0.334345	0.327399	0.317691	0.302119	0.326079	0.343915	0.31461	0.30158	0.315457	0.323229	0.306972	0.301234	0.29591	0.307861	0.313942	0.342573	0.297652	0.307935	0.382258	0.30616	0.319372	0.322817	0.320841	0.305792	0.317391	0.317482	0.309422	0.315827	0.307062	0.309097	0.313977	0.320263	0.337977
	6.99628	0.323235	0.327101	0.299041	0.314084	0.329725	0.303638	0.295401	0.326353	0.31658	0.345756	0.331765	0.325022	0.343744	0.319114	0.326751	0.33971	0.328517	0.312476	0.295119	0.33563	0.33716	0.321166	0.296215	0.313483	0.31836	0.313123	0.291379	0.300309	0.308852	0.304604	0.329549	0.303588	0.311999	0.377126	0.310328	0.327846	0.335804	0.316675	0.295394	0.322355	0.327567	0.306103	0.318444	0.309725	0.308761	0.313293	0.331098	0.3516
	7.02967	0.331788	0.3272	0.3108	0.317328	0.318943	0.305587	0.294619	0.320579	0.315814	0.339018	0.333304	0.316212	0.323085	0.318279	0.31929	0.335386	0.328298	0.304128	0.289761	0.31461	0.348478	0.314064	0.30712	0.305575	0.321402	0.309771	0.302969	0.296712	0.313421	0.311199	0.335998	0.289847	0.30611	0.36773	0.315046	0.304266	0.335167	0.31898	0.290871	0.318138	0.317172	0.304085	0.309504	0.314816	0.309708	0.300613	0.323271	0.346671
	7.06295	0.327091	0.324273	0.301158	0.324979	0.326088	0.314242	0.290983	0.325566	0.309441	0.333509	0.328895	0.323844	0.325269	0.302495	0.323783	0.330842	0.332544	0.31532	0.301776	0.333042	0.342919	0.318214	0.311956	0.318949	0.335341	0.315583	0.298011	0.300762	0.300274	0.310791	0.334679	0.287096	0.309949	0.371522	0.313376	0.313636	0.340345	0.32245	0.297343	0.321039	0.306656	0.310538	0.314567	0.303743	0.315008	0.315608	0.325183	0.34764
	7.0963	0.33036	0.321886	0.313651	0.317003	0.33574	0.302992	0.306627	0.322605	0.312669	0.352085	0.319996	0.326195	0.334126	0.322147	0.326757	0.331526	0.333738	0.323156	0.301127	0.340969	0.330579	0.319775	0.300566	0.319676	0.337955	0.315806	0.306569	0.300801	0.31249	0.307871	0.337001	0.29225	0.317208	0.386825	0.315487	0.309572	0.333863	0.314486	0.302392	0.318696	0.320752	0.306504	0.314328	0.310766	0.311063	0.309876	0.329943	0.34268
	7.12962	0.328359	0.321288	0.304122	0.311107	0.334885	0.309969	0.295056	0.321943	0.311167	0.343398	0.331376	0.315264	0.335962	0.317159	0.332808	0.334762	0.332185	0.321533	0.313472	0.329722	0.330903	0.312398	0.295745	0.32305	0.332396	0.307044	0.303913	0.297063	0.31197	0.304787	0.336087	0.29054	0.314576	0.376349	0.320233	0.324731	0.323237	0.324329	0.300104	0.319292	0.316934	0.312975	0.320373	0.306442	0.31229	0.303591	0.31413	0.344084
	7.16295	0.325394	0.32202	0.299209	0.306068	0.326802	0.283075	0.295542	0.319965	0.310261	0.336369	0.331747	0.324392	0.334055	0.312994	0.322326	0.329953	0.335541	0.312936	0.302466	0.326797	0.333001	0.318512	0.292678	0.313833	0.329428	0.310267	0.300033	0.299941	0.311766	0.312197	0.335712	0.292509	0.313027	0.369144	0.304049	0.317203	0.346064	0.325486	0.309128	0.326023	0.317818	0.30966	0.3099	0.301701	0.305593	0.306328	0.316763	0.345184
	7.19628	0.331561	0.324335	0.301166	0.309744	0.343068	0.293861	0.296639	0.31448	0.309425	0.339652	0.331314	0.331497	0.33745	0.317217	0.332872	0.33467	0.33143	0.315408	0.299154	0.346296	0.334653	0.311811	0.302974	0.318928	0.314339	0.310604	0.295064	0.304684	0.311346	0.297544	0.335461	0.292275	0.308659	0.378171	0.305035	0.309199	0.310984	0.306697	0.30167	0.315169	0.331386	0.308265	0.312041	0.307228	0.319617	0.30793	0.321653	0.341871
	7.22962	0.332974	0.324676	0.308017	0.312568	0.333003	0.305579	0.298225	0.324105	0.314787	0.340171	0.330691	0.330737	0.323784	0.307991	0.329151	0.33792	0.338088	0.309517	0.299675	0.338735	0.334942	0.309957	0.301499	0.31253	0.330488	0.310523	0.303653	0.302331	0.308217	0.302715	0.338805	0.279542	0.305538	0.378988	0.317841	0.334364	0.340078	0.329806	0.297422	0.327773	0.325047	0.302862	0.30975	0.309347	0.321401	0.316584	0.323758	0.342652
	7.26297	0.33074	0.325596	0.303396	0.315013	0.330057	0.301216	0.296034	0.321952	0.313923	0.34118	0.313901	0.32391	0.327862	0.30669	0.334098	0.333652	0.324938	0.30814	0.302479	0.325021	0.329542	0.298065	0.297765	0.302235	0.331399	0.312878	0.300051	0.300781	0.303473	0.289707	0.327811	0.289156	0.306688	0.364794	0.314021	0.303207	0.331026	0.310108	0.308507	0.314521	0.331766	0.304187	0.311232	0.301995	0.317548	0.305841	0.322473	0.337216
	7.29625	0.331088	0.318574	0.306255	0.318149	0.334671	0.305766	0.297287	0.331373	0.318236	0.345422	0.325905	0.324233	0.330287	0.321349	0.316891	0.337765	0.337811	0.317582	0.299162	0.32313	0.324552	0.316552	0.301039	0.308598	0.333003	0.316503	0.301137	0.297952	0.307003	0.298658	0.329707	0.29081	0.320263	0.369538	0.305583	0.323889	0.330058	0.321704	0.301415	0.329779	0.327126	0.303993	0.313706	0.317247	0.322433	0.318699	0.319585	0.350973
	7.32963	0.327839	0.321682	0.305329	0.3101	0.33252	0.298701	0.292352	0.318782	0.314218	0.318268	0.324602	0.327034	0.319122	0.321766	0.33042	0.33811	0.335324	0.313718	0.293353	0.329552	0.3329	0.316068	0.298929	0.313929	0.319076	0.309378	0.302048	0.299863	0.310209	0.295188	0.323771	0.303121	0.309959	0.374584	0.298114	0.324499	0.328812	0.31609	0.307848	0.328106	0.312524	0.309963	0.306043	0.312273	0.31888	0.312971	0.324669	0.343987
	7.36295	0.330756	0.322278	0.303279	0.312156	0.348491	0.302798	0.296482	0.325699	0.314872	0.341328	0.31912	0.32029	0.325913	0.298374	0.316802	0.327621	0.328192	0.310055	0.301878	0.3327	0.321802	0.320818	0.309142	0.307743	0.331074	0.314097	0.303134	0.300755	0.320436	0.309497	0.334237	0.294465	0.308711	0.38023	0.309058	0.309233	0.318974	0.327227	0.306429	0.321803	0.321965	0.30861	0.312996	0.31129	0.320994	0.304653	0.313828	0.344729
	7.3963	0.323963	0.323857	0.307025	0.313694	0.332149	0.295241	0.301331	0.321952	0.311901	0.334675	0.316255	0.327283	0.336559	0.311944	0.338545	0.328725	0.329113	0.311563	0.288599	0.329039	0.309293	0.319448	0.286532	0.316369	0.342519	0.311251	0.305014	0.300717	0.304024	0.30506	0.326661	0.297362	0.305718	0.366036	0.315203	0.315563	0.328465	0.320218	0.298915	0.299453	0.321286	0.309597	0.316072	0.305573	0.312591	0.30393	0.30735	0.345286
	7.42957	0.334867	0.324874	0.300177	0.310937	0.34651	0.288231	0.292763	0.323972	0.31916	0.330866	0.325089	0.328407	0.330258	0.324403	0.324628	0.33027	0.325485	0.316837	0.298506	0.324781	0.322055	0.316673	0.294252	0.311794	0.321355	0.308979	0.296593	0.294768	0.314991	0.31094	0.336257	0.290771	0.316751	0.365827	0.312267	0.311429	0.328521	0.32003	0.296789	0.326601	0.312369	0.31763	0.312295	0.31536	0.314769	0.299008	0.321908	0.344271
	7.46293	0.327514	0.323366	0.305449	0.316185	0.33054	0.29602	0.286882	0.326456	0.316257	0.349278	0.321888	0.334245	0.327367	0.31112	0.333014	0.334827	0.328027	0.312278	0.304244	0.32143	0.330264	0.323383	0.304356	0.307757	0.338875	0.304604	0.302417	0.300202	0.31451	0.310148	0.325404	0.30225	0.317118	0.380245	0.304008	0.32051	0.306431	0.314333	0.305636	0.315329	0.326481	0.306593	0.316828	0.313883	0.314459	0.301462	0.328422	0.3468
	7.4963	0.326177	0.323726	0.307286	0.315417	0.336413	0.294061	0.28982	0.327139	0.315153	0.338111	0.327507	0.3236	0.333393	0.315395	0.326547	0.334459	0.325631	0.309841	0.297821	0.31938	0.326819	0.322682	0.308712	0.310182	0.324809	0.308225	0.302966	0.306753	0.313585	0.302479	0.337382	0.301112	0.323128	0.376933	0.30958	0.312698	0.308641	0.321243	0.297312	0.314283	0.335589	0.303899	0.317726	0.308141	0.313692	0.304681	0.306049	0.347832
	7.52963	0.337414	0.325167	0.303784	0.309434	0.340475	0.297378	0.292732	0.31456	0.30819	0.344747	0.328912	0.324126	0.330637	0.309867	0.332656	0.33629	0.334114	0.303981	0.310865	0.328924	0.333423	0.319493	0.303123	0.306078	0.342712	0.302468	0.300578	0.297573	0.315234	0.310396	0.324627	0.296151	0.31222	0.386315	0.3231	0.317195	0.32621	0.310901	0.309089	0.325726	0.33278	0.297818	0.309785	0.310971	0.317285	0.297003	0.314814	0.339464
	7.56297	0.331192	0.3283	0.30824	0.307141	0.337437	0.300658	0.295209	0.324193	0.315563	0.341375	0.325829	0.32298	0.325401	0.316406	0.319328	0.329161	0.334922	0.307861	0.301551	0.319519	0.337366	0.309613	0.300471	0.303332	0.330866	0.306075	0.303091	0.291423	0.324032	0.303403	0.327066	0.29502	0.308151	0.361497	0.307863	0.318798	0.324675	0.313397	0.296808	0.320038	0.326856	0.304272	0.313758	0.313313	0.320706	0.305496	0.315213	0.347388
	7.59632	0.331611	0.332207	0.308702	0.309205	0.330742	0.296492	0.290229	0.31925	0.31974	0.337712	0.326863	0.330971	0.331887	0.309597	0.328925	0.336223	0.334313	0.322807	0.30036	0.311821	0.320771	0.311342	0.289929	0.315542	0.34615	0.298691	0.307842	0.296937	0.314355	0.30753	0.331345	0.295245	0.320885	0.367987	0.312387	0.308599	0.303711	0.317687	0.302903	0.331634	0.325076	0.305662	0.312646	0.311478	0.317631	0.304003	0.31902	0.338519
	7.62963	0.331023	0.324086	0.305098	0.315766	0.335706	0.303884	0.289507	0.31883	0.303196	0.346825	0.321835	0.323621	0.327265	0.315791	0.317363	0.327316	0.328608	0.308647	0.292492	0.308737	0.318653	0.313889	0.303817	0.312728	0.346809	0.306828	0.29307	0.297832	0.321312	0.322336	0.331313	0.29436	0.308405	0.369599	0.306111	0.31989	0.32359	0.316872	0.295614	0.309649	0.331296	0.3062	0.316918	0.305679	0.315885	0.301546	0.314027	0.344588
	7.66293	0.334848	0.324269	0.309326	0.309955	0.32831	0.296156	0.286815	0.325028	0.311061	0.33802	0.330876	0.323152	0.319133	0.314871	0.327548	0.333851	0.326401	0.311029	0.290794	0.323545	0.318186	0.30842	0.298139	0.31482	0.340818	0.299788	0.303735	0.299218	0.301601	0.306971	0.337007	0.293112	0.307403	0.371888	0.310528	0.318839	0.30606	0.31727	0.299924	0.312804	0.32081	0.297899	0.314835	0.308988	0.326329	0.302283	0.29981	0.343729
	7.69627	0.333286	0.321644	0.306529	0.32709	0.338879	0.289782	0.305131	0.327005	0.319015	0.343291	0.325271	0.326767	0.330268	0.31951	0.313347	0.335473	0.327568	0.325087	0.296638	0.336155	0.320089	0.320005	0.301932	0.313287	0.323214	0.313383	0.297897	0.301489	0.312775	0.312656	0.328529	0.292582	0.325537	0.37279	0.308294	0.301727	0.300806	0.317429	0.305639	0.308103	0.321972	0.3052	0.315695	0.296482	0.316049	0.314909	0.317908	0.337903
	7.72963	0.330107	0.325404	0.303688	0.310837	0.336423	0.297738	0.298154	0.321558	0.306413	0.341224	0.319043	0.32536	0.329399	0.321363	0.321789	0.333409	0.326908	0.315472	0.311207	0.314321	0.320628	0.312422	0.294015	0.312844	0.346529	0.30914	0.298567	0.299751	0.311954	0.325416	0.331472	0.289126	0.311819	0.36589	0.316697	0.306704	0.327836	0.311926	0.305103	0.314986	0.320696	0.294171	0.303857	0.30638	0.306889	0.300232	0.308198	0.343722
	7.76297	0.331575	0.324715	0.30813	0.310906	0.338875	0.299301	0.294458	0.326376	0.313709	0.334206	0.33271	0.325154	0.317731	0.31239	0.324842	0.32836	0.321609	0.311456	0.306215	0.335286	0.322703	0.313349	0.301042	0.311118	0.341131	0.298726	0.302002	0.295105	0.312737	0.29849	0.32609	0.296813	0.313509	0.359622	0.306508	0.310662	0.317019	0.326165	0.298426	0.329058	0.319974	0.294027	0.312948	0.306878	0.30817	0.295554	0.310214	0.342434
	7.7963	0.328281	0.32277	0.308182	0.324718	0.328803	0.297128	0.29922	0.326347	0.309995	0.352784	0.329641	0.330398	0.328797	0.315365	0.324107	0.337025	0.323296	0.310661	0.295735	0.312735	0.337922	0.317317	0.301892	0.319924	0.33673	0.302428	0.294652	0.295587	0.310092	0.304661	0.329735	0.286816	0.31556	0.367259	0.312385	0.296337	0.315452	0.309773	0.299444	0.323758	0.326004	0.300892	0.314002	0.299753	0.31048	0.296034	0.305126	0.341262
	7.82958	0.332204	0.325355	0.29894	0.312529	0.33619	0.294308	0.290882	0.318669	0.312305	0.3384	0.319648	0.32661	0.332323	0.319112	0.322875	0.33123	0.32586	0.31417	0.310578	0.32553	0.331538	0.308875	0.303577	0.3092	0.336975	0.314074	0.300058	0.295773	0.311377	0.302567	0.333059	0.293607	0.31007	0.373566	0.319942	0.317585	0.344377	0.31852	0.302383	0.315273	0.321645	0.308743	0.310548	0.315889	0.311172	0.301607	0.314096	0.342862
	7.86293	0.334418	0.32321	0.305006	0.322507	0.326564	0.298117	0.295539	0.325982	0.316644	0.344857	0.313141	0.326154	0.33421	0.309181	0.323898	0.33347	0.33411	0.314871	0.30528	0.339885	0.330632	0.320452	0.302231	0.306399	0.335315	0.310941	0.305693	0.300511	0.314811	0.303827	0.322457	0.287751	0.311418	0.363707	0.314363	0.312777	0.312953	0.314616	0.30359	0.316518	0.313158	0.298939	0.31713	0.313462	0.316232	0.298163	0.305872	0.343987
	7.8963	0.326928	0.323227	0.307996	0.320964	0.330852	0.293	0.291904	0.327246	0.313927	0.347305	0.321998	0.325323	0.328218	0.312554	0.319674	0.332695	0.332189	0.306058	0.294666	0.317847	0.317391	0.324923	0.296833	0.319587	0.336806	0.306803	0.29507	0.302356	0.313149	0.30443	0.325791	0.291139	0.306083	0.367191	0.30899	0.31614	0.330246	0.328633	0.30038	0.308701	0.331886	0.311431	0.311885	0.302373	0.30992	0.307497	0.308324	0.345094
	7.92962	0.329991	0.322298	0.308499	0.31044	0.329279	0.298016	0.303594	0.325405	0.31784	0.344025	0.329687	0.322688	0.332028	0.318107	0.324665	0.331935	0.331308	0.322148	0.299887	0.328909	0.322867	0.312437	0.305716	0.30508	0.337431	0.311383	0.31507	0.298978	0.316157	0.288553	0.325392	0.297301	0.314457	0.363875	0.314992	0.325097	0.307752	0.310244	0.310251	0.331532	0.317752	0.3038	0.309761	0.305878	0.312864	0.305378	0.304655	0.353711
	7.96292	0.328014	0.320379	0.305798	0.313071	0.334542	0.304436	0.293066	0.320958	0.306684	0.349101	0.323835	0.328037	0.32739	0.310549	0.319957	0.330725	0.329827	0.310075	0.2962	0.335113	0.308987	0.314327	0.296988	0.313112	0.335539	0.301602	0.294346	0.296549	0.312202	0.301712	0.32999	0.298535	0.310202	0.367093	0.303123	0.326136	0.313701	0.298806	0.28932	0.310079	0.322579	0.300579	0.312555	0.300503	0.322793	0.30596	0.307632	0.342747
	7.99625	0.326069	0.325739	0.306779	0.314385	0.338867	0.299428	0.292165	0.325798	0.315159	0.343272	0.326879	0.32807	0.329964	0.313526	0.321062	0.341017	0.334181	0.315706	0.309187	0.328559	0.339242	0.313431	0.304752	0.322213	0.338132	0.308388	0.297662	0.304551	0.302265	0.297098	0.328968	0.295466	0.305896	0.369418	0.303192	0.308603	0.321701	0.32207	0.294813	0.327732	0.324695	0.30429	0.314173	0.303133	0.317565	0.298671	0.305094	0.340388
	8.02963	0.326216	0.322651	0.302905	0.317038	0.328216	0.290212	0.301687	0.314402	0.313024	0.347942	0.329835	0.32343	0.329819	0.312794	0.323158	0.332853	0.328893	0.307542	0.285939	0.318527	0.333635	0.330478	0.300276	0.327573	0.344459	0.30524	0.293297	0.296145	0.313797	0.297848	0.33225	0.291199	0.309759	0.364264	0.301743	0.306181	0.309757	0.305976	0.305624	0.325638	0.308639	0.302068	0.312762	0.304603	0.303633	0.299749	0.310249	0.342099
	8.06295	0.328517	0.323537	0.313082	0.313789	0.333588	0.296691	0.297173	0.324503	0.311608	0.336568	0.320801	0.314766	0.3224	0.315229	0.323747	0.331736	0.336648	0.311317	0.298556	0.329333	0.326178	0.311553	0.31025	0.322806	0.341868	0.306712	0.295123	0.298507	0.313326	0.32073	0.321138	0.299964	0.309876	0.362301	0.30748	0.321334	0.314068	0.321673	0.306924	0.316046	0.314183	0.303246	0.311265	0.29842	0.320147	0.288223	0.303701	0.34136
	8.0963	0.325504	0.318978	0.311848	0.308145	0.335607	0.294132	0.302184	0.319731	0.309676	0.343544	0.320355	0.327276	0.339312	0.308462	0.319446	0.329856	0.331841	0.315261	0.301717	0.32694	0.327716	0.318885	0.301177	0.311434	0.338927	0.306414	0.302886	0.303137	0.307519	0.309207	0.319682	0.280285	0.308508	0.368495	0.295249	0.325545	0.317129	0.321035	0.299716	0.318401	0.311989	0.304192	0.308721	0.305321	0.310538	0.300444	0.307127	0.346197
	8.12962	0.335784	0.319901	0.303131	0.320857	0.337831	0.297413	0.291555	0.324389	0.310355	0.336144	0.320572	0.331437	0.322488	0.306062	0.321188	0.336321	0.330388	0.307311	0.295553	0.328358	0.32248	0.31052	0.301552	0.313899	0.333649	0.302086	0.301747	0.294877	0.309021	0.322629	0.325755	0.287624	0.313397	0.36384	0.308032	0.302288	0.313928	0.323491	0.298486	0.316306	0.331551	0.304961	0.319088	0.309607	0.313992	0.297698	0.300524	0.338032
	8.16295	0.332	0.322686	0.305531	0.31718	0.332448	0.297942	0.293191	0.323961	0.305971	0.338797	0.323253	0.327246	0.326471	0.304425	0.319093	0.334432	0.323888	0.312608	0.299728	0.327461	0.331008	0.31157	0.308793	0.312685	0.350441	0.297273	0.297038	0.305067	0.31298	0.3077	0.322846	0.300327	0.313133	0.368596	0.308851	0.316479	0.303729	0.319656	0.299524	0.314087	0.319951	0.299391	0.313185	0.305281	0.306893	0.298721	0.302824	0.334279
	8.19632	0.334769	0.320012	0.301739	0.302436	0.33129	0.291892	0.286572	0.32362	0.318406	0.353242	0.324393	0.324138	0.31206	0.307892	0.315069	0.336393	0.333497	0.322916	0.313219	0.324309	0.326622	0.313879	0.297792	0.311824	0.339004	0.298802	0.295691	0.295157	0.314359	0.30337	0.329696	0.293321	0.318363	0.35982	0.300433	0.30604	0.308324	0.29647	0.301509	0.316987	0.324473	0.300207	0.310172	0.307252	0.310121	0.296663	0.308697	0.347156
	8.22968	0.333006	0.31822	0.304996	0.315406	0.348413	0.301891	0.29082	0.325449	0.314544	0.336689	0.326458	0.320978	0.336463	0.314886	0.311148	0.330999	0.331994	0.310376	0.311768	0.320097	0.326677	0.318344	0.285366	0.327811	0.343594	0.312691	0.287916	0.293576	0.312645	0.297048	0.321961	0.279739	0.315014	0.364637	0.305599	0.32163	0.299759	0.306803	0.305685	0.302179	0.317488	0.300846	0.302399	0.304291	0.31449	0.297938	0.299249	0.346222
	8.26298	0.339007	0.325412	0.306764	0.308969	0.330127	0.298637	0.293704	0.320536	0.314697	0.33523	0.330918	0.325576	0.322793	0.310128	0.319021	0.337522	0.334595	0.31509	0.296217	0.318409	0.338996	0.32272	0.294534	0.308084	0.330362	0.296833	0.300971	0.305544	0.317521	0.319525	0.318909	0.293096	0.310491	0.358956	0.303714	0.30485	0.305796	0.300472	0.30085	0.316651	0.315259	0.300406	0.313218	0.303278	0.30509	0.296548	0.308585	0.339569
	8.29628	0.327631	0.321161	0.307811	0.311297	0.326816	0.289034	0.285897	0.322784	0.306036	0.339747	0.320739	0.332356	0.32574	0.31447	0.322896	0.329609	0.319982	0.297676	0.305994	0.326707	0.325878	0.317549	0.291571	0.316658	0.345986	0.299878	0.294744	0.308347	0.326134	0.30887	0.323644	0.295048	0.309377	0.359893	0.305687	0.31166	0.297173	0.316904	0.307572	0.32236	0.314144	0.299282	0.310898	0.312475	0.314291	0.301124	0.310615	0.350613
	8.3296	0.337009	0.322628	0.305795	0.315123	0.321756	0.293629	0.301885	0.317952	0.308695	0.333909	0.321085	0.327108	0.320763	0.315122	0.320164	0.332553	0.324954	0.313001	0.310083	0.325425	0.329875	0.312971	0.295965	0.318622	0.330844	0.304052	0.301397	0.302679	0.308622	0.298335	0.319937	0.293364	0.31513	0.374162	0.314973	0.312813	0.301264	0.29993	0.300192	0.319214	0.318545	0.289641	0.31271	0.312486	0.321288	0.30229	0.300394	0.344485
	8.36295	0.340566	0.32609	0.2968	0.317699	0.349342	0.301993	0.295357	0.324327	0.312987	0.343273	0.318209	0.322742	0.336641	0.31464	0.314798	0.33444	0.330106	0.319996	0.306956	0.32451	0.330867	0.322764	0.309354	0.315623	0.343088	0.297904	0.300325	0.303118	0.321428	0.300903	0.331292	0.285618	0.310743	0.371047	0.307558	0.321818	0.303267	0.316594	0.302181	0.321249	0.323508	0.301097	0.314378	0.312421	0.313908	0.292957	0.314233	0.344893
	8.39628	0.338643	0.323459	0.303589	0.309365	0.337844	0.301013	0.295174	0.322522	0.309974	0.34057	0.328273	0.325791	0.316027	0.312523	0.312278	0.329521	0.334422	0.310646	0.294511	0.328379	0.324068	0.315265	0.299877	0.306385	0.344309	0.301698	0.294489	0.303371	0.324795	0.309409	0.320727	0.286584	0.312296	0.372498	0.310242	0.314645	0.301229	0.313202	0.308271	0.319339	0.315998	0.310121	0.30882	0.31998	0.320227	0.302956	0.292649	0.349419
	8.42958	0.330756	0.330085	0.30609	0.315786	0.332985	0.298227	0.291003	0.32927	0.313845	0.329549	0.323148	0.329844	0.331924	0.30978	0.315811	0.326254	0.330843	0.308896	0.301063	0.330806	0.307816	0.312545	0.305603	0.315428	0.34987	0.306956	0.304531	0.299692	0.308995	0.304178	0.324297	0.285359	0.305922	0.371329	0.308116	0.315879	0.321517	0.335181	0.307497	0.317273	0.30498	0.298748	0.315855	0.302612	0.315199	0.299155	0.309704	0.346416
	8.46298	0.328722	0.320342	0.301568	0.315187	0.351131	0.297796	0.298373	0.322837	0.311669	0.342948	0.319638	0.332767	0.329769	0.318871	0.311586	0.335681	0.328625	0.306148	0.295934	0.334838	0.301938	0.308853	0.312687	0.313697	0.339491	0.2992	0.296364	0.297509	0.325446	0.314245	0.320755	0.301038	0.311436	0.367848	0.303683	0.318777	0.303846	0.323338	0.3007	0.321202	0.32316	0.300874	0.314074	0.311418	0.306518	0.306245	0.306902	0.339484
	8.49632	0.331316	0.318466	0.302691	0.308957	0.331497	0.297492	0.287602	0.313807	0.313614	0.340291	0.326968	0.324979	0.328141	0.317357	0.315385	0.327276	0.326249	0.306715	0.290395	0.314503	0.329459	0.308998	0.301613	0.312369	0.326572	0.307126	0.299935	0.290292	0.315946	0.291509	0.326629	0.300081	0.31443	0.358972	0.306202	0.322528	0.296012	0.316982	0.308182	0.314103	0.324402	0.297882	0.309654	0.315923	0.311978	0.299333	0.297655	0.342926
	8.52963	0.336804	0.329004	0.29859	0.313869	0.345347	0.287694	0.296972	0.32522	0.321068	0.336467	0.324124	0.328627	0.324017	0.308929	0.307861	0.329504	0.330101	0.305197	0.303736	0.333347	0.326325	0.312895	0.298664	0.321232	0.327646	0.305129	0.300471	0.293399	0.315809	0.303856	0.33449	0.289771	0.315753	0.369554	0.300412	0.329161	0.322292	0.316407	0.310695	0.336761	0.312627	0.304762	0.320554	0.305437	0.315669	0.299059	0.306596	0.345322
	8.56295	0.327953	0.313756	0.291906	0.309804	0.339227	0.291832	0.287648	0.320058	0.310022	0.330217	0.331567	0.318723	0.323637	0.316794	0.320164	0.332384	0.31994	0.308996	0.290053	0.331852	0.314179	0.306019	0.29649	0.31404	0.323272	0.293427	0.301405	0.297392	0.316791	0.300758	0.328753	0.295957	0.306653	0.358955	0.304827	0.327476	0.321157	0.306363	0.297746	0.312379	0.320673	0.29228	0.304052	0.307535	0.308366	0.300753	0.298388	0.343153
	8.59627	0.334212	0.316795	0.303985	0.320395	0.335912	0.294631	0.295443	0.322267	0.314257	0.333657	0.319845	0.324549	0.31673	0.310871	0.30888	0.329225	0.323606	0.312597	0.288663	0.325952	0.323843	0.318869	0.30709	0.308689	0.333332	0.297352	0.286081	0.296538	0.306589	0.301047	0.333772	0.296378	0.311911	0.369257	0.292454	0.326153	0.300221	0.326253	0.293901	0.312747	0.317586	0.302047	0.31144	0.321881	0.316079	0.299846	0.300144	0.346177
	8.62957	0.332349	0.315768	0.307818	0.313631	0.337416	0.297806	0.294222	0.319348	0.313581	0.336547	0.314509	0.331807	0.319524	0.316799	0.313656	0.330152	0.326783	0.315669	0.296708	0.337343	0.321193	0.319	0.308656	0.310863	0.324538	0.308355	0.300214	0.297198	0.309045	0.302291	0.327263	0.289289	0.307996	0.374793	0.307035	0.312965	0.305817	0.320333	0.303531	0.307012	0.305215	0.308542	0.306206	0.309089	0.316978	0.29989	0.292085	0.346515
	8.66297	0.339447	0.314432	0.305975	0.315559	0.33329	0.294012	0.290237	0.319984	0.321956	0.340361	0.334396	0.331603	0.32311	0.312907	0.319554	0.334395	0.326811	0.3191	0.291252	0.313209	0.319746	0.319691	0.29987	0.320621	0.339875	0.308842	0.291933	0.29828	0.315754	0.300802	0.323239	0.289772	0.314215	0.364732	0.302425	0.300375	0.311148	0.315703	0.297968	0.315595	0.31945	0.299205	0.307325	0.306641	0.315763	0.297243	0.304682	0.338389
	8.69628	0.334551	0.321436	0.289727	0.316404	0.339567	0.292251	0.297701	0.319271	0.310049	0.334345	0.322691	0.322737	0.323094	0.303077	0.319186	0.329878	0.328	0.315579	0.30296	0.318083	0.323205	0.311467	0.29348	0.316483	0.327281	0.290406	0.293951	0.290059	0.311073	0.291391	0.322139	0.296162	0.316579	0.370211	0.315481	0.298667	0.313673	0.319856	0.288969	0.310719	0.314318	0.29598	0.307703	0.315002	0.309236	0.3005	0.297122	0.343082
	8.72962	0.336228	0.318871	0.301836	0.308051	0.340437	0.294491	0.292024	0.322986	0.322446	0.340933	0.323914	0.328428	0.326737	0.301027	0.310784	0.329984	0.332611	0.314862	0.294371	0.34505	0.330504	0.311904	0.303075	0.312413	0.343965	0.308	0.305558	0.29549	0.315287	0.306624	0.326937	0.304321	0.311352	0.364999	0.309702	0.32004	0.312555	0.305091	0.298291	0.324941	0.329768	0.299436	0.316011	0.303806	0.317378	0.306398	0.298362	0.343297
	8.76295	0.330318	0.322957	0.305851	0.319492	0.329334	0.300369	0.297854	0.317689	0.31604	0.348074	0.321455	0.321997	0.322806	0.326482	0.322563	0.328573	0.331841	0.316264	0.299467	0.330528	0.326337	0.316261	0.297774	0.314272	0.334886	0.298416	0.299126	0.300234	0.320619	0.315943	0.321247	0.291339	0.309393	0.372493	0.311775	0.321436	0.295778	0.330577	0.302897	0.32322	0.327672	0.30747	0.309458	0.30229	0.326346	0.299677	0.311053	0.34084
	8.79632	0.333822	0.324246	0.303242	0.312731	0.338751	0.30459	0.298977	0.312507	0.305599	0.333781	0.316785	0.331071	0.317782	0.308886	0.324381	0.327916	0.324605	0.307487	0.288521	0.339119	0.316727	0.308081	0.291537	0.304612	0.329796	0.300091	0.29646	0.29859	0.31706	0.292754	0.321897	0.282536	0.30517	0.3727	0.297819	0.315626	0.299329	0.313925	0.303262	0.313429	0.314981	0.300431	0.310332	0.306357	0.30792	0.304358	0.293011	0.345526
	8.82963	0.339244	0.321562	0.299572	0.31015	0.337823	0.295184	0.290971	0.316035	0.308969	0.339647	0.315649	0.333184	0.333544	0.309755	0.316332	0.326179	0.329799	0.312555	0.308601	0.329994	0.313393	0.315141	0.301609	0.308184	0.328361	0.309025	0.290996	0.306638	0.319215	0.294721	0.333759	0.279736	0.317644	0.370614	0.301629	0.314772	0.322835	0.302346	0.308055	0.328009	0.309077	0.294883	0.309319	0.30489	0.306618	0.296455	0.300129	0.345394
	8.86295	0.332975	0.316134	0.302811	0.311124	0.333001	0.297348	0.294282	0.31097	0.310727	0.337723	0.316101	0.32692	0.314142	0.317224	0.325101	0.332812	0.324853	0.302949	0.286771	0.317289	0.329393	0.315603	0.304752	0.316925	0.330831	0.296554	0.292488	0.298633	0.316874	0.294293	0.33003	0.281992	0.308225	0.372268	0.30017	0.307387	0.304094	0.308508	0.303465	0.306761	0.313065	0.292978	0.312208	0.314864	0.306255	0.295279	0.302437	0.336716
	8.89632	0.331561	0.322706	0.308334	0.304506	0.327862	0.29901	0.289853	0.318379	0.315297	0.336185	0.329643	0.317618	0.322174	0.314564	0.308955	0.327543	0.331466	0.304782	0.298891	0.319391	0.312215	0.314512	0.295434	0.309668	0.327332	0.302246	0.291292	0.294174	0.313555	0.304944	0.319053	0.293284	0.299057	0.353178	0.292662	0.31044	0.30257	0.298731	0.30052	0.31433	0.313295	0.299956	0.311407	0.295857	0.312827	0.295665	0.299623	0.339312
	8.9296	0.333457	0.323153	0.301518	0.311596	0.329729	0.291106	0.288474	0.315589	0.307342	0.341118	0.331071	0.318588	0.327416	0.31091	0.316993	0.331531	0.333994	0.311281	0.304682	0.326524	0.328637	0.317176	0.313159	0.317892	0.319284	0.305773	0.294005	0.295182	0.319871	0.303186	0.321661	0.288046	0.309565	0.365623	0.317273	0.323018	0.334213	0.31117	0.303916	0.314088	0.316418	0.292395	0.317261	0.320773	0.314852	0.29695	0.301617	0.344347
	8.96297	0.331213	0.328306	0.302977	0.309685	0.334812	0.289682	0.294525	0.312776	0.309785	0.329811	0.321211	0.329196	0.324104	0.321275	0.317605	0.330301	0.326633	0.319578	0.288266	0.320224	0.324466	0.313408	0.291228	0.312492	0.33347	0.297387	0.296521	0.292806	0.310667	0.303355	0.319278	0.300282	0.305974	0.371168	0.303341	0.317438	0.303655	0.319942	0.301543	0.30993	0.327	0.296935	0.309588	0.308722	0.311028	0.297149	0.305336	0.334452
	8.99628	0.3293	0.320104	0.306424	0.302144	0.332359	0.298231	0.27727	0.313901	0.305539	0.336655	0.321157	0.325372	0.329605	0.310793	0.320542	0.329989	0.326192	0.310536	0.297945	0.328916	0.321152	0.316447	0.293075	0.294298	0.337523	0.306417	0.295452	0.299015	0.316644	0.297014	0.318372	0.286306	0.307367	0.361052	0.297139	0.328819	0.314348	0.316996	0.291579	0.307084	0.317407	0.294486	0.31202	0.30348	0.320071	0.292602	0.286391	0.342927
	9.02963	0.330005	0.323947	0.311571	0.30873	0.340315	0.296781	0.299788	0.315714	0.293439	0.335916	0.322268	0.319682	0.329243	0.310908	0.31682	0.331193	0.327481	0.307493	0.30625	0.342132	0.322542	0.320165	0.308363	0.314481	0.324261	0.302096	0.300627	0.291344	0.32866	0.304699	0.33106	0.293502	0.31414	0.367828	0.306385	0.309006	0.307061	0.308277	0.308185	0.312893	0.323344	0.296594	0.317861	0.310611	0.320193	0.301803	0.304613	0.34056
	9.06297	0.331696	0.319655	0.304899	0.316489	0.331215	0.292815	0.292077	0.312428	0.310868	0.334391	0.324266	0.325783	0.316586	0.314413	0.322363	0.339499	0.340946	0.308294	0.29142	0.333451	0.311437	0.311673	0.306987	0.3207	0.331884	0.296617	0.303026	0.298115	0.312265	0.297541	0.329914	0.295456	0.310824	0.366762	0.301593	0.316235	0.310216	0.325514	0.302112	0.318786	0.318998	0.300225	0.315804	0.320051	0.315019	0.303031	0.305627	0.336778
	9.0963	0.333631	0.324848	0.303145	0.311828	0.329656	0.295666	0.280845	0.311492	0.30583	0.336577	0.314624	0.319533	0.325196	0.310217	0.31429	0.332001	0.328007	0.315463	0.292582	0.339639	0.319653	0.311514	0.306033	0.306448	0.322731	0.299735	0.301118	0.296637	0.313538	0.302703	0.330665	0.295261	0.307072	0.37663	0.306697	0.318294	0.306867	0.320627	0.297329	0.312134	0.315601	0.302186	0.313317	0.305748	0.322354	0.299773	0.294645	0.342266
	9.12967	0.328957	0.317845	0.302755	0.310118	0.325291	0.293061	0.298407	0.329088	0.307089	0.340491	0.312922	0.32284	0.331272	0.312953	0.310724	0.324437	0.331018	0.31172	0.299413	0.311292	0.328273	0.317358	0.307479	0.320458	0.327918	0.300377	0.298725	0.300693	0.311288	0.293857	0.33246	0.295161	0.312271	0.361598	0.306568	0.313759	0.318312	0.315747	0.294195	0.32164	0.328053	0.287869	0.317088	0.30062	0.323571	0.298645	0.299653	0.338835
	9.16297	0.333161	0.319826	0.3046	0.30863	0.327819	0.295698	0.296255	0.321721	0.312966	0.334166	0.329377	0.32577	0.326129	0.315893	0.32595	0.330661	0.330484	0.319146	0.306341	0.333866	0.321818	0.312785	0.31116	0.313533	0.323543	0.302949	0.298347	0.294352	0.319866	0.303024	0.328091	0.288964	0.31528	0.358153	0.310755	0.33479	0.308074	0.316034	0.298805	0.305649	0.320251	0.298707	0.305872	0.310401	0.318197	0.297853	0.296564	0.341408
	9.19628	0.32662	0.316836	0.307599	0.308775	0.334827	0.298339	0.301154	0.3102	0.312799	0.332706	0.329232	0.325916	0.324896	0.32133	0.31124	0.324278	0.322762	0.313214	0.299523	0.328721	0.314277	0.319694	0.305849	0.314473	0.333625	0.299984	0.301725	0.299203	0.316391	0.290634	0.331077	0.290753	0.310192	0.360808	0.307696	0.303959	0.304971	0.314395	0.303594	0.318357	0.31242	0.293158	0.314081	0.31853	0.313996	0.296342	0.296594	0.341308
	9.22963	0.323869	0.326026	0.309427	0.310921	0.332946	0.291125	0.290924	0.314661	0.306423	0.336154	0.320253	0.325843	0.318632	0.308607	0.31814	0.327231	0.322639	0.305408	0.305844	0.325292	0.322812	0.315451	0.301614	0.32499	0.325597	0.301068	0.299465	0.294767	0.313217	0.296134	0.325407	0.285595	0.31104	0.36743	0.308033	0.325003	0.306388	0.32479	0.306401	0.320671	0.319646	0.29303	0.307299	0.32191	0.315891	0.3054	0.291754	0.337437
	9.26295	0.331245	0.318478	0.304093	0.311529	0.335436	0.30362	0.295196	0.310913	0.309822	0.333096	0.331846	0.326463	0.320682	0.312957	0.316754	0.327237	0.333134	0.313542	0.303615	0.324195	0.330499	0.300384	0.310904	0.306628	0.335282	0.302439	0.296108	0.294605	0.316639	0.308145	0.327214	0.29409	0.309362	0.351005	0.305159	0.310458	0.303649	0.309075	0.301859	0.317878	0.318643	0.290465	0.316346	0.307961	0.327725	0.298755	0.293746	0.33851
	9.29632	0.333409	0.320632	0.310364	0.306749	0.33299	0.284806	0.293273	0.317968	0.309816	0.332702	0.316839	0.319953	0.324794	0.314979	0.317055	0.337827	0.326183	0.316083	0.294141	0.332383	0.311197	0.320565	0.299212	0.303849	0.322248	0.310324	0.299094	0.295568	0.322085	0.293981	0.320942	0.278473	0.30549	0.361031	0.305916	0.31796	0.296213	0.315176	0.307762	0.31654	0.326134	0.307051	0.305105	0.30984	0.321198	0.304076	0.305869	0.346093
	9.32962	0.325676	0.31931	0.296871	0.315487	0.334769	0.292716	0.292253	0.306332	0.302066	0.338296	0.318846	0.328346	0.331634	0.304324	0.320387	0.335368	0.327906	0.3143	0.301361	0.331986	0.335127	0.315302	0.299984	0.324381	0.322035	0.300338	0.30578	0.296982	0.314131	0.303702	0.335567	0.302485	0.313968	0.356225	0.305852	0.322853	0.305866	0.305999	0.303052	0.303706	0.315555	0.283603	0.315706	0.312256	0.316818	0.297594	0.303227	0.340139
	9.36297	0.332545	0.323759	0.304637	0.31341	0.324478	0.298552	0.290512	0.321956	0.307624	0.327727	0.328211	0.312681	0.324214	0.306996	0.335327	0.331011	0.333583	0.31151	0.294495	0.327107	0.327307	0.314604	0.30171	0.319236	0.340727	0.301909	0.296049	0.296238	0.315503	0.303929	0.329694	0.295449	0.306393	0.355607	0.299066	0.314505	0.291354	0.312709	0.297239	0.316369	0.315818	0.301415	0.313401	0.302809	0.319277	0.302295	0.300956	0.33843
	9.39623	0.330413	0.318109	0.302508	0.306171	0.337093	0.300582	0.301473	0.32805	0.311864	0.343013	0.314314	0.321692	0.327338	0.312138	0.335576	0.33109	0.332487	0.318342	0.30089	0.318781	0.326575	0.29785	0.305619	0.315998	0.328826	0.299232	0.300772	0.298012	0.321405	0.315431	0.331525	0.28907	0.308089	0.364	0.309544	0.320344	0.31973	0.328154	0.298373	0.312633	0.326603	0.299063	0.318722	0.326207	0.318148	0.301561	0.281596	0.34189
	9.42962	0.323518	0.318307	0.303598	0.313724	0.336056	0.295529	0.288408	0.314029	0.315032	0.330264	0.319395	0.321309	0.329391	0.306568	0.31846	0.324791	0.330445	0.316355	0.276633	0.320316	0.317523	0.313669	0.309902	0.306633	0.31013	0.301878	0.295911	0.293544	0.31631	0.311346	0.321702	0.299622	0.311021	0.357519	0.295229	0.325262	0.298446	0.305001	0.299793	0.309373	0.313118	0.288735	0.315093	0.319218	0.312162	0.295304	0.303476	0.337107
	9.46298	0.335572	0.323189	0.312435	0.316835	0.335924	0.299359	0.295892	0.313486	0.310244	0.347699	0.327218	0.327434	0.310816	0.313776	0.312673	0.330462	0.328323	0.31661	0.291566	0.337543	0.312795	0.318663	0.300361	0.318873	0.353383	0.302532	0.295699	0.287933	0.324992	0.288721	0.334002	0.302461	0.313224	0.363573	0.312408	0.32265	0.296576	0.317036	0.305181	0.327471	0.304275	0.299033	0.317228	0.314982	0.32079	0.293771	0.301275	0.342157
	9.49628	0.324993	0.311121	0.301417	0.317311	0.33068	0.301363	0.290275	0.317194	0.315252	0.34621	0.32708	0.320651	0.323694	0.307821	0.322533	0.329882	0.327699	0.309622	0.298954	0.324888	0.31878	0.319979	0.298384	0.312643	0.326675	0.298754	0.299017	0.290381	0.307783	0.304967	0.328897	0.28308	0.307809	0.355191	0.313073	0.304024	0.290562	0.315121	0.296613	0.307199	0.307801	0.29865	0.309412	0.309182	0.312118	0.29777	0.29663	0.338847
	9.5296	0.329869	0.31961	0.309196	0.303395	0.33959	0.303964	0.293424	0.319456	0.30505	0.323173	0.329381	0.32178	0.320162	0.310302	0.321896	0.326623	0.327126	0.307456	0.303511	0.327432	0.326253	0.309349	0.299528	0.31302	0.320699	0.301246	0.291657	0.290082	0.316804	0.311235	0.328411	0.276894	0.305815	0.355588	0.291186	0.325876	0.30053	0.320389	0.307019	0.315909	0.317137	0.289935	0.307406	0.295262	0.320086	0.296671	0.29258	0.337805
	9.56295	0.331994	0.313876	0.304619	0.307872	0.333626	0.301505	0.297983	0.31012	0.303351	0.332198	0.324147	0.326493	0.325826	0.306779	0.317566	0.33197	0.332557	0.314797	0.296775	0.329622	0.325916	0.326944	0.293838	0.322529	0.337655	0.299953	0.294985	0.297409	0.33052	0.313341	0.323884	0.28668	0.320936	0.35952	0.30927	0.315806	0.305056	0.318675	0.303952	0.315489	0.32384	0.291633	0.315655	0.317672	0.320232	0.299503	0.288639	0.341422
	9.5963	0.329987	0.318283	0.305466	0.303369	0.332244	0.306528	0.305494	0.32078	0.306377	0.333925	0.325567	0.31832	0.320767	0.320776	0.31782	0.33668	0.325431	0.30404	0.298996	0.329127	0.329941	0.31141	0.304693	0.315656	0.323704	0.306725	0.293756	0.291539	0.321267	0.293005	0.333003	0.284479	0.314703	0.353432	0.290739	0.320767	0.287427	0.302773	0.299644	0.309678	0.314386	0.301964	0.310107	0.326771	0.315062	0.295471	0.293437	0.338753
	9.6296	0.321717	0.312959	0.303173	0.309409	0.335704	0.298084	0.286781	0.304081	0.30549	0.332363	0.317282	0.314801	0.322315	0.304195	0.322695	0.330746	0.324263	0.312031	0.287792	0.319899	0.308756	0.306206	0.301976	0.316636	0.318222	0.304369	0.295875	0.285669	0.316071	0.299764	0.331657	0.276628	0.30578	0.349044	0.297875	0.319289	0.290982	0.294459	0.307541	0.3068	0.311984	0.30185	0.310167	0.30824	0.317056	0.290802	0.295517	0.337365
	9.66295	0.321863	0.321448	0.316856	0.309698	0.338612	0.31156	0.293767	0.318184	0.306564	0.334752	0.321533	0.329118	0.334964	0.306875	0.31577	0.326018	0.333428	0.293793	0.298879	0.335232	0.315998	0.311859	0.294873	0.332146	0.338209	0.31003	0.297166	0.29328	0.33808	0.306986	0.326065	0.284165	0.319335	0.356843	0.308622	0.318458	0.321096	0.326338	0.30248	0.318975	0.327179	0.296746	0.312491	0.313575	0.315092	0.297956	0.301054	0.327018
	9.69627	0.332155	0.322328	0.307152	0.312476	0.330568	0.303329	0.297647	0.32395	0.30247	0.329872	0.311632	0.318242	0.332165	0.319993	0.322011	0.330639	0.329375	0.309231	0.301976	0.319349	0.328601	0.301014	0.302446	0.318472	0.322179	0.298191	0.303836	0.29378	0.321264	0.289622	0.322981	0.292185	0.309782	0.352304	0.313155	0.3216	0.30015	0.31739	0.302452	0.322588	0.31124	0.291775	0.318519	0.306698	0.319713	0.30725	0.302607	0.340907
	9.72962	0.331054	0.324748	0.309596	0.298371	0.330253	0.295546	0.286506	0.317202	0.310621	0.337988	0.32555	0.320314	0.325	0.305185	0.31579	0.327869	0.329067	0.309323	0.310211	0.328675	0.318	0.305919	0.310518	0.323332	0.341729	0.301787	0.293731	0.29603	0.313097	0.295648	0.337117	0.289378	0.321054	0.352298	0.303519	0.328498	0.305456	0.308095	0.302021	0.315997	0.315633	0.287393	0.308142	0.311304	0.324318	0.299447	0.297221	0.34058
	9.76293	0.325758	0.319219	0.299001	0.309017	0.315015	0.287197	0.280163	0.312536	0.312629	0.339922	0.321109	0.314857	0.321429	0.315091	0.309304	0.325434	0.329795	0.309552	0.301048	0.327921	0.319195	0.307859	0.298249	0.312372	0.3227	0.297143	0.289799	0.299941	0.31485	0.314935	0.333246	0.281868	0.318786	0.359865	0.304954	0.320066	0.282872	0.317648	0.306153	0.322105	0.319782	0.299983	0.311214	0.3059	0.32582	0.296847	0.305414	0.338999
	9.79628	0.328745	0.313146	0.304922	0.307697	0.33556	0.298801	0.290144	0.315829	0.317106	0.332717	0.337484	0.32716	0.315295	0.30623	0.310155	0.329942	0.32328	0.302005	0.29263	0.331373	0.321845	0.310374	0.301635	0.308785	0.316535	0.306247	0.29276	0.296077	0.312437	0.306056	0.340059	0.288158	0.321808	0.349388	0.292922	0.285116	0.299916	0.327337	0.300874	0.31177	0.320801	0.298386	0.311722	0.399393	0.317006	0.303784	0.30804	0.33853
	9.8296	0.319672	0.314031	0.314362	0.324746	0.336651	0.307974	0.278649	0.31101	0.318376	0.340555	0.331931	0.31971	0.327822	0.290381	0.306522	0.333301	0.331275	0.320137	0.303839	0.338326	0.320694	0.307777	0.296785	0.318561	0.304569	0.302116	0.291726	0.292043	0.332804	0.314594	0.325597	0.291209	0.306961	0.341789	0.300656	0.308965	0.289146	0.295257	0.30401	0.318294	0.324154	0.290492	0.318656	0.317917	0.317546	0.297688	0.304016	0.342503
	9.86298	0.333382	0.326184	0.306386	0.312738	0.338932	0.304416	0.296239	0.325868	0.31986	0.346768	0.335273	0.32969	0.320454	0.316223	0.318528	0.330725	0.334997	0.319078	0.303053	0.340124	0.331808	0.312116	0.293294	0.32259	0.32016	0.299324	0.296238	0.294415	0.306453	0.294729	0.341686	0.275236	0.314999	0.358517	0.298146	0.301434	0.298653	0.321828	0.309534	0.321944	0.32299	0.307819	0.310759	0.318763	0.321962	0.298833	0.304483	0.341925
	9.89628	0.314912	0.307993	0.306463	0.301347	0.323202	0.290689	0.285455	0.309759	0.29775	0.313971	0.325607	0.319947	0.302648	0.300189	0.316736	0.322067	0.323493	0.307037	0.29832	0.330446	0.315234	0.300785	0.306638	0.308518	0.31505	0.304822	0.290489	0.295042	0.315349	0.303966	0.331553	0.284972	0.307099	0.344995	0.299655	0.295659	0.301961	0.304734	0.2977	0.303234	0.311984	0.296938	0.303349	0.293802	0.314109	0.295044	0.304125	0.355929
	9.92965	0.326592	0.319231	0.298706	0.309475	0.331244	0.30122	0.292931	0.322346	0.321692	0.339384	0.332338	0.317461	0.32688	0.322635	0.320987	0.337292	0.331038	0.315426	0.308165	0.329535	0.312243	0.30409	0.305896	0.316071	0.322839	0.300148	0.292318	0.288029	0.330459	0.306888	0.390696	0.284925	0.309522	0.342021	0.305317	0.33307	0.302543	0.318235	0.32074	0.322882	0.31985	0.298509	0.314303	0.311521	0.329916	0.308315	0.298772	0.342841
	9.96297	0.352437	0.337696	0.323451	0.319161	0.374966	0.315274	0.32593	0.335016	0.3298	0.398996	0.34391	0.333462	0.355156	0.328861	0.33336	0.368217	0.344218	0.323047	0.323485	0.355098	0.333297	0.327453	0.325083	0.350018	0.335783	0.311629	0.313263	0.300619	0.341551	0.321479	0.511678	0.318815	0.335925	0.368568	0.318481	0.336113	0.340574	0.339588	0.364653	0.356266	0.337874	0.320141	0.346913	0.350295	0.387715	0.312121	0.323604	0.340071
	9.9963	0.395273	0.369436	0.345598	0.348359	0.400726	0.347132	0.375927	0.356989	0.376501	0.447552	0.384649	0.359415	0.398004	0.384436	0.380756	0.41189	0.377492	0.342878	0.330404	0.381035	0.342555	0.356424	0.353449	0.363062	0.359847	0.34356	0.332169	0.320624	0.370248	0.367239	0.638336	0.361353	0.361855	0.387625	0.352889	0.358006	0.382261	0.392787	0.42322	0.413429	0.376257	0.350336	0.375182	0.394682	0.423895	0.335998	0.351311	0.361181
	10.0296	0.427987	0.41256	0.369366	0.353391	0.444537	0.377728	0.402196	0.384996	0.403306	0.519049	0.436179	0.390932	0.424332	0.412654	0.399918	0.449489	0.395249	0.354715	0.353928	0.459929	0.377083	0.403487	0.398871	0.394607	0.377908	0.361359	0.346649	0.325949	0.402731	0.394293	0.757675	0.396095	0.393384	0.401488	0.37398	0.423426	0.404984	0.417907	0.464257	0.460641	0.407104	0.380965	0.421029	0.431511	0.490157	0.363003	0.382527	0.377973
	10.063	0.495127	0.445581	0.387957	0.377932	0.496848	0.375774	0.440396	0.400829	0.438182	0.586185	0.477517	0.393971	0.479002	0.458806	0.411098	0.514314	0.402224	0.368385	0.363304	0.488617	0.40622	0.433195	0.4145	0.429663	0.392536	0.393109	0.372017	0.330674	0.441079	0.400454	0.873374	0.426037	0.421238	0.443213	0.402826	0.437358	0.442427	0.481652	0.531479	0.537647	0.42032	0.418006	0.448838	0.483244	0.567194	0.391775	0.424671	0.398343
	10.0963	0.525985	0.48309	0.42365	0.40154	0.545227	0.42634	0.480912	0.42965	0.476295	0.68064	0.513817	0.43514	0.51172	0.526975	0.451799	0.580936	0.429354	0.395508	0.375494	0.531892	0.421669	0.482935	0.441433	0.47195	0.413776	0.412514	0.388389	0.345198	0.465829	0.442609	1.00958	0.475418	0.468017	0.446487	0.419574	0.480553	0.478473	0.529056	0.639308	0.60766	0.461062	0.453559	0.500671	0.547686	0.647696	0.417793	0.449204	0.404807
	10.1296	0.575594	0.524328	0.449057	0.428947	0.588983	0.453336	0.518773	0.451394	0.518332	0.788653	0.563904	0.460773	0.567804	0.567966	0.483452	0.625347	0.449151	0.399827	0.3956	0.650739	0.463523	0.527553	0.48125	0.506612	0.43458	0.427292	0.417916	0.373356	0.506882	0.482836	1.10639	0.516011	0.499481	0.487145	0.45224	0.523331	0.513891	0.55696	0.707723	0.705844	0.467196	0.488141	0.52828	0.640261	0.715466	0.45107	0.493241	0.434873
	10.163	0.624396	0.567005	0.478156	0.442209	0.674909	0.456692	0.562642	0.460392	0.519943	0.872406	0.612988	0.488264	0.609169	0.622333	0.541527	0.706896	0.481966	0.421254	0.413516	0.701572	0.50572	0.592425	0.492826	0.530048	0.445043	0.457711	0.445491	0.385249	0.543347	0.505289	1.17672	0.556828	0.552045	0.506665	0.478759	0.571066	0.507457	0.619848	0.79939	0.806004	0.518336	0.508001	0.585463	0.648049	0.792995	0.481859	0.543605	0.460249
	10.1963	0.665292	0.623747	0.509829	0.468941	0.729379	0.506624	0.635339	0.498184	0.586989	0.964731	0.649253	0.516875	0.647601	0.678521	0.563586	0.797117	0.50151	0.433385	0.42817	0.748606	0.53809	0.640624	0.53298	0.582004	0.449037	0.491453	0.485046	0.394042	0.582281	0.572715	1.25765	0.628507	0.588325	0.521073	0.521856	0.629729	0.543277	0.670376	0.895083	0.899208	0.586939	0.552582	0.628673	0.706112	0.879889	0.543924	0.586372	0.484767
	10.2296	0.719985	0.665278	0.550752	0.487624	0.79476	0.552001	0.669999	0.493395	0.617807	1.0277	0.68631	0.539572	0.704154	0.743209	0.614076	0.865126	0.513763	0.447353	0.453	0.785718	0.553464	0.689192	0.583735	0.638717	0.486275	0.508992	0.483069	0.409519	0.633042	0.624066	1.30703	0.652528	0.643341	0.546441	0.553741	0.697053	0.621712	0.741676	0.984982	0.946173	0.629775	0.573492	0.66005	0.728927	0.948892	0.571418	0.622923	0.506092
	10.263	0.72472	0.697929	0.584926	0.495622	0.883681	0.588725	0.715638	0.539818	0.667105	1.10264	0.71819	0.568697	0.778116	0.812035	0.688232	0.923019	0.54144	0.45536	0.459754	0.892455	0.622511	0.757787	0.597061	0.704162	0.507855	0.542764	0.509827	0.425036	0.647132	0.664739	1.30461	0.662893	0.702536	0.561878	0.622312	0.739383	0.577206	0.756176	1.02751	0.981028	0.709049	0.611334	0.736481	0.753376	1.0225	0.638767	0.738721	0.530269
	10.2963	0.755371	0.723113	0.583143	0.516863	0.964143	0.601021	0.741875	0.54014	0.690657	1.11821	0.777673	0.587843	0.800996	0.886101	0.784226	0.983555	0.551354	0.481513	0.488055	0.940553	0.663583	0.775305	0.659869	0.77139	0.502762	0.606349	0.533003	0.446904	0.705937	0.671184	1.2953	0.692551	0.778655	0.599982	0.626606	0.775139	0.619444	0.798033	1.10407	1.03275	0.737165	0.6528	0.775551	0.764042	1.06703	0.690495	0.769694	0.560104
	10.3295	0.812157	0.770313	0.635142	0.555466	0.977605	0.665624	0.788223	0.559869	0.747652	1.19846	0.830582	0.637704	0.871522	0.937064	0.882884	1.05043	0.593599	0.51006	0.49352	0.983397	0.722189	0.810251	0.656387	0.81952	0.533479	0.615872	0.566084	0.457267	0.710158	0.744209	1.34249	0.730723	0.849623	0.622724	0.668297	0.841408	0.628488	0.885029	1.13258	1.08109	0.830635	0.680706	0.838487	0.82668	1.12364	0.783271	0.846079	0.582565
	10.3629	0.832073	0.801228	0.668396	0.550444	1.02642	0.675971	0.79302	0.573328	0.760529	1.22872	0.87058	0.676799	0.905898	0.981805	0.907603	1.05767	0.617695	0.501165	0.491123	1.05531	0.747802	0.853646	0.646321	0.847478	0.555319	0.648713	0.605328	0.448567	0.7284	0.787048	1.34898	0.769487	0.915716	0.639223	0.658454	0.855743	0.677834	0.873355	1.15275	1.07562	0.869789	0.708313	0.843257	0.834467	1.1767	0.817312	0.858253	0.612947
	10.3963	0.860012	0.813301	0.721415	0.574506	1.10738	0.722078	0.844307	0.599487	0.803548	1.26279	0.961833	0.718873	0.932316	1.04168	0.989518	1.14353	0.657155	0.553602	0.525396	1.17199	0.77085	0.900145	0.702187	0.944767	0.576807	0.675668	0.608583	0.47925	0.760642	0.835733	1.38599	0.785657	0.972226	0.656354	0.722973	0.878301	0.669701	0.950438	1.21667	1.17002	0.908693	0.714705	0.908661	0.852853	1.21879	0.891109	0.935082	0.641974
	10.4296	0.893436	0.827263	0.784037	0.601754	1.15598	0.719572	0.859937	0.605734	0.790091	1.27237	0.966484	0.764736	0.927482	1.07307	1.07677	1.17508	0.690976	0.563298	0.546231	1.20887	0.796544	0.925374	0.66211	0.961458	0.589195	0.716162	0.673856	0.495956	0.795525	0.841231	1.30592	0.759872	1.01876	0.677933	0.707896	0.93796	0.689751	0.89936	1.27155	1.15757	0.980668	0.7486	0.915393	0.851768	1.25595	0.951854	0.975196	0.698059
	10.4629	0.900195	0.853154	0.810321	0.61833	1.19088	0.73934	0.868974	0.626283	0.838529	1.34266	1.01063	0.77718	0.97325	1.15444	1.13237	1.24798	0.717436	0.600737	0.57883	1.26634	0.860937	0.943147	0.730067	1.00781	0.606306	0.749678	0.681797	0.512768	0.818404	0.886172	1.38153	0.79463	1.06948	0.707002	0.727714	0.922554	0.712171	0.933931	1.32162	1.20287	1.00414	0.74461	0.955014	0.893599	1.36246	0.987482	1.05099	0.736781
	10.4963	0.937992	0.87646	0.837259	0.643091	1.27409	0.782489	0.878549	0.619107	0.852731	1.39535	1.0411	0.843702	0.991432	1.14649	1.20072	1.27568	0.751396	0.606332	0.589603	1.28528	0.85494	1.01489	0.749036	1.07298	0.624062	0.79042	0.704944	0.510011	0.832093	0.910892	1.41242	0.813373	1.11882	0.712733	0.7343	0.928228	0.704011	0.957761	1.29469	1.30185	1.01013	0.777077	0.999672	0.895468	1.32459	1.07483	1.04769	0.778329
	10.5296	0.964967	0.89422	0.868346	0.653724	1.22259	0.809517	0.907152	0.651502	0.84805	1.34654	1.0368	0.848752	1.00041	1.19706	1.26398	1.27898	0.778112	0.632246	0.599746	1.30119	0.842262	1.00371	0.718225	1.07258	0.618595	0.809102	0.719383	0.528003	0.866572	0.981218	1.43117	0.789361	1.16997	0.740718	0.750187	0.990971	0.714828	0.962704	1.37621	1.26168	1.09046	0.777676	1.00023	0.921736	1.37277	1.08691	1.03036	0.80827
	10.5629	0.997807	0.915707	0.888178	0.670037	1.29988	0.812826	0.934236	0.664401	0.864537	1.41387	1.09483	0.882561	1.04424	1.22098	1.35558	1.39222	0.792518	0.658562	0.621579	1.44115	0.8847	1.02251	0.743831	1.12416	0.633593	0.817535	0.751147	0.557802	0.866362	0.994855	1.40109	0.826681	1.17921	0.746908	0.760983	1.03455	0.75528	1.05526	1.38074	1.27535	1.12696	0.787728	1.02194	0.89288	1.38553	1.12216	1.15739	0.855433
	10.5963	1.00481	0.922666	0.920505	0.729866	1.32672	0.831786	0.936663	0.661606	0.894048	1.36962	1.11374	0.909386	1.04788	1.2759	1.3911	1.34087	0.824081	0.666989	0.641961	1.36381	0.919175	1.03519	0.744597	1.09827	0.642762	0.829949	0.733909	0.56994	0.912521	1.00296	1.40968	0.833645	1.20692	0.752942	0.78501	1.01545	0.705309	1.01175	1.40276	1.31346	1.13797	0.81085	1.02906	0.956739	1.40251	1.17748	1.13516	0.889855
	10.6296	1.02787	0.937182	0.951984	0.733569	1.35819	0.817311	0.967839	0.680587	0.894102	1.35588	1.18223	0.951956	1.07934	1.25382	1.43424	1.39171	0.832014	0.664613	0.644108	1.45305	0.949381	1.09257	0.749314	1.115	0.6098	0.849165	0.783867	0.578699	0.94213	1.06745	1.40904	0.846026	1.24042	0.759231	0.79038	1.00625	0.724659	1.03623	1.3565	1.32475	1.15524	0.811819	1.05114	0.946082	1.42309	1.20985	1.18074	0.917978
	10.663	0.982109	0.930045	0.958641	0.745102	1.33407	0.834716	0.956339	0.697031	0.917145	1.36096	1.17899	0.965396	1.12729	1.24644	1.46069	1.45682	0.857644	0.692545	0.69281	1.41771	0.911029	1.06898	0.740626	1.16477	0.660086	0.897916	0.807481	0.599243	0.945182	1.08608	1.35629	0.832273	1.28287	0.778723	0.785819	1.01545	0.740521	1.08919	1.40531	1.33001	1.16684	0.817591	1.08055	0.922603	1.41722	1.18632	1.22345	0.941177
	10.6963	0.996449	0.916164	0.964055	0.768381	1.35378	0.818822	0.982851	0.698732	0.896719	1.39632	1.17053	0.986255	1.1255	1.28622	1.45239	1.44194	0.871874	0.726141	0.674457	1.41772	0.939491	1.04554	0.765935	1.18282	0.646172	0.85805	0.799754	0.602689	0.915697	1.13813	1.32802	0.79496	1.27357	0.791003	0.778664	0.994309	0.729436	1.06529	1.38495	1.26246	1.13647	0.795892	1.10044	0.9549	1.39217	1.24559	1.20091	0.984747
	10.7296	1.06558	0.978689	0.988133	0.772882	1.37588	0.844411	0.982842	0.694398	0.927361	1.39334	1.22219	1.01875	1.14559	1.2728	1.50931	1.47693	0.893433	0.73328	0.694882	1.39943	0.952486	1.07272	0.76167	1.20361	0.644432	0.910984	0.811545	0.623983	1.00924	1.20646	1.32184	0.834274	1.32225	0.808973	0.778023	1.0263	0.75975	1.08671	1.41003	1.20964	1.22549	0.833826	1.12523	0.90029	1.4505	1.26162	1.32074	1.00504
	10.763	1.04156	0.963695	0.993241	0.788333	1.42972	0.84381	0.972314	0.719803	0.918017	1.39099	1.23989	1.02011	1.1212	1.32934	1.50545	1.44169	0.911596	0.718967	0.700993	1.4966	0.9443	1.0858	0.762477	1.26083	0.671855	0.930736	0.82589	0.63063	0.971736	1.19369	1.33033	0.834475	1.33458	0.786771	0.785479	1.05837	0.741975	1.07703	1.37134	1.30078	1.19098	0.838715	1.10946	0.923828	1.46771	1.25295	1.31204	1.03122
	10.7962	1.04284	0.964257	1.01697	0.827152	1.38035	0.851533	0.979333	0.701924	0.943275	1.40241	1.22732	1.01731	1.14304	1.29764	1.50375	1.46511	0.925379	0.752792	0.68669	1.504	0.959073	1.09072	0.764801	1.26327	0.671878	0.948028	0.851758	0.640949	0.977362	1.13335	1.32492	0.830743	1.31368	0.841701	0.810656	1.0468	0.760964	1.14916	1.37352	1.29202	1.16667	0.845567	1.12544	0.929042	1.42272	1.2885	1.34711	1.05871
	10.8296	1.03355	0.994839	1.05966	0.827434	1.35926	0.868749	0.983497	0.731659	0.951139	1.43269	1.23523	1.0714	1.15789	1.37943	1.51569	1.48285	0.948681	0.739087	0.711438	1.40668	0.992935	1.11392	0.768144	1.27157	0.690346	0.928528	0.862168	0.649641	0.9869	1.20793	1.38743	0.843097	1.35569	0.838902	0.780372	1.07195	0.740539	1.08288	1.39285	1.32016	1.25542	0.833076	1.17431	0.93502	1.38721	1.32257	1.35296	1.08902
	10.863	1.06869	0.972663	1.04764	0.833842	1.40819	0.866991	1.01701	0.734245	0.965319	1.38052	1.25311	1.10031	1.14838	1.33206	1.52269	1.44293	0.976376	0.771161	0.71042	1.52101	0.9967	1.10632	0.77163	1.31434	0.668941	0.979885	0.91109	0.660087	0.997602	1.29174	1.34489	0.878321	1.35316	0.852116	0.825424	1.09031	0.762198	1.12323	1.41209	1.23457	1.21677	0.833189	1.19522	0.945614	1.40181	1.31278	1.35132	1.11325
	10.8963	1.05325	0.991854	1.07308	0.861084	1.38666	0.868138	0.994794	0.737216	0.966711	1.45712	1.25529	1.09607	1.14614	1.3727	1.54511	1.49536	0.958002	0.752614	0.725194	1.41846	1.0088	1.13263	0.778577	1.3372	0.686704	0.970855	0.896472	0.670443	0.981002	1.18474	1.31807	0.837009	1.36474	0.852244	0.82827	1.06872	0.715094	1.15361	1.42026	1.25237	1.21775	0.827322	1.16701	0.934826	1.3942	1.3437	1.37948	1.16096
	10.9296	1.07403	0.974601	1.08583	0.838584	1.3681	0.831978	0.992896	0.728783	0.993047	1.42439	1.26561	1.08321	1.14116	1.33421	1.54165	1.49078	1.00135	0.76945	0.75411	1.45551	1.00002	1.11752	0.753644	1.31866	0.683716	0.988136	0.898499	0.671171	1.01128	1.24666	1.33388	0.888546	1.37891	0.859396	0.827633	1.09132	0.765893	1.13339	1.37776	1.28388	1.21958	0.821871	1.19373	0.922716	1.41336	1.29711	1.37476	1.17281
	10.9629	1.03829	0.974758	1.07817	0.876684	1.40846	0.869311	0.98691	0.754892	0.983466	1.36925	1.28189	1.1231	1.14307	1.29015	1.49017	1.47715	0.980678	0.783132	0.734857	1.40775	1.02497	1.09709	0.74106	1.26043	0.668454	0.986003	0.893153	0.682218	1.00549	1.28036	1.33113	0.857916	1.34038	0.856667	0.824835	1.11168	0.756447	1.08335	1.39706	1.29729	1.1973	0.831562	1.14454	0.962022	1.38375	1.33074	1.33546	1.18186
	10.9963	1.04973	0.975041	1.08639	0.899878	1.38945	0.884251	1.00912	0.740404	0.983327	1.40508	1.29906	1.13732	1.15771	1.33503	1.52139	1.46578	1.00131	0.795879	0.740356	1.44945	0.973323	1.10923	0.75863	1.30087	0.724627	1.00128	0.885619	0.687062	1.02618	1.24206	1.29689	0.829633	1.35102	0.899796	0.806576	1.06922	0.763387	1.15776	1.39909	1.25368	1.15681	0.829295	1.16588	0.945322	1.38603	1.38443	1.33451	1.22678
	11.0296	1.00586	0.978721	1.07625	0.87478	1.43818	0.832582	1.01605	0.741973	0.962465	1.36422	1.27885	1.1421	1.1339	1.28683	1.49616	1.46841	1.01114	0.7747	0.718584	1.44297	1.00149	1.09611	0.721982	1.31035	0.684081	1.00856	0.889564	0.688126	0.965002	1.26311	1.25736	0.82254	1.36062	0.880414	0.815758	1.0331	0.732738	1.14445	1.39747	1.27405	1.15511	0.82402	1.19204	0.943056	1.39897	1.36253	1.33576	1.25086
	11.0629	1.04802	0.980782	1.04495	0.888315	1.37362	0.894502	0.980155	0.763323	1.02022	1.38907	1.32321	1.14346	1.17377	1.34502	1.51018	1.45949	1.02202	0.76789	0.741331	1.41588	1.01178	1.13471	0.769283	1.30587	0.698631	1.05234	0.92085	0.708824	1.00105	1.23116	1.29736	0.860706	1.31818	0.879334	0.819035	1.06701	0.77151	1.07295	1.33688	1.2711	1.18407	0.82403	1.17829	0.950794	1.41097	1.35023	1.35167	1.24685
	11.0963	1.04835	0.970448	1.05987	0.888434	1.41008	0.832624	1.02931	0.759285	1.00053	1.41021	1.33758	1.17019	1.19148	1.32329	1.52209	1.49016	1.00015	0.763395	0.781637	1.41154	1.0025	1.10637	0.752014	1.34458	0.719344	1.04359	0.940301	0.706981	0.97493	1.26344	1.23472	0.845851	1.33099	0.896949	0.791558	1.08586	0.779437	1.15836	1.32983	1.23306	1.18971	0.824715	1.22252	0.943754	1.41708	1.33719	1.32018	1.25969
	11.1296	1.04893	0.980967	1.08869	0.902639	1.43848	0.845977	1.01557	0.742035	1.02181	1.36525	1.30172	1.18503	1.14779	1.3133	1.48821	1.48433	1.01763	0.779405	0.799507	1.43198	0.996932	1.11912	0.742455	1.2867	0.691607	1.02723	0.925271	0.715558	1.01628	1.20527	1.27954	0.832691	1.34209	0.89553	0.803201	1.04834	0.751593	1.10024	1.38785	1.24833	1.18135	0.828246	1.21876	0.933463	1.34464	1.38397	1.39875	1.2954
	11.163	1.04164	0.961745	1.08334	0.893003	1.42095	0.847101	0.993257	0.729917	0.958896	1.38862	1.29243	1.20054	1.15234	1.29406	1.45767	1.42997	1.04416	0.798937	0.772713	1.482	1.02165	1.10721	0.738906	1.28842	0.7241	1.05001	0.952847	0.711715	1.00443	1.23609	1.26694	0.827654	1.33043	0.905665	0.830127	1.09478	0.754083	1.17007	1.35761	1.31484	1.19059	0.840362	1.22015	0.920976	1.38111	1.31338	1.38597	1.31068
	11.1963	1.04197	0.959765	1.0767	0.869635	1.37689	0.869366	0.986952	0.742954	1.00214	1.3912	1.32839	1.17116	1.15674	1.31838	1.44226	1.47026	1.02911	0.800329	0.810898	1.41209	1.02021	1.09272	0.753394	1.27829	0.72508	1.04573	0.953459	0.721614	0.97308	1.23165	1.29129	0.826784	1.33264	0.893569	0.808946	1.0683	0.767724	1.15122	1.33679	1.27582	1.18324	0.83275	1.20898	0.938324	1.3519	1.30932	1.36937	1.3137
	11.2296	1.03975	0.965936	1.06495	0.901101	1.37036	0.86021	0.9948	0.735505	0.995942	1.37535	1.28843	1.18489	1.14047	1.31005	1.52359	1.4661	1.04087	0.797042	0.746519	1.37099	0.986625	1.13263	0.730634	1.31676	0.734665	1.07122	0.988411	0.729068	0.986954	1.25034	1.30063	0.834503	1.34246	0.91303	0.802383	1.07239	0.681235	1.12497	1.35405	1.25657	1.17882	0.82657	1.21171	0.961674	1.34641	1.32404	1.31466	1.30906
	11.2629	1.04177	0.961464	1.07287	0.901813	1.38711	0.834323	1.01171	0.757164	1.01999	1.34047	1.31301	1.18266	1.11973	1.3208	1.42959	1.42308	1.03467	0.823179	0.770804	1.42805	0.98278	1.10796	0.703229	1.31611	0.728758	1.0442	0.981831	0.714213	1.02023	1.26003	1.2829	0.85151	1.37383	0.93713	0.794464	1.0907	0.746319	1.15977	1.34827	1.25608	1.17089	0.832054	1.20654	0.925714	1.38772	1.31894	1.32488	1.32436
	11.2963	1.0658	0.966535	1.08768	0.916473	1.39616	0.867794	1.02283	0.745074	1.03792	1.31481	1.32586	1.19568	1.16255	1.2876	1.49391	1.41562	1.0379	0.809868	0.765962	1.37118	1.01117	1.12314	0.721832	1.35875	0.738391	1.04394	0.970125	0.721567	1.00618	1.2436	1.26302	0.831893	1.30072	0.962861	0.796116	1.06375	0.706699	1.22666	1.38108	1.22774	1.2028	0.833889	1.20457	0.943843	1.44787	1.32042	1.35571	1.30972
	11.3296	1.03996	0.964405	1.09722	0.903576	1.40114	0.820801	1.02572	0.736847	1.00977	1.37505	1.32583	1.18505	1.11282	1.30208	1.42749	1.4348	1.05534	0.795831	0.793841	1.45069	0.989102	1.14942	0.699958	1.35275	0.722327	1.07052	0.947316	0.726046	1.01353	1.24931	1.30002	0.837357	1.35721	0.905867	0.809053	1.04553	0.740142	1.07788	1.33497	1.23263	1.1732	0.862491	1.176	0.935161	1.34383	1.32605	1.3556	1.33971
	11.3629	1.0343	0.95339	1.09588	0.930478	1.37809	0.870501	1.03369	0.751328	1.02285	1.34821	1.3209	1.18536	1.1308	1.34435	1.45283	1.41666	1.06009	0.78531	0.787776	1.44144	1.00358	1.10601	0.703994	1.33351	0.765896	1.03888	0.976308	0.716335	1.01358	1.21321	1.25988	0.857336	1.32486	0.927413	0.784845	1.11068	0.739521	1.13707	1.33002	1.28685	1.2147	0.833361	1.20397	0.90429	1.36689	1.35158	1.32149	1.33472
	11.3963	1.03347	0.976088	1.10246	0.901532	1.37546	0.862007	1.02035	0.740569	1.02046	1.36151	1.27206	1.17753	1.16033	1.28953	1.44189	1.4168	1.02049	0.817465	0.780802	1.36953	1.01739	1.13458	0.716823	1.32727	0.740116	1.05971	0.978295	0.731651	1.02049	1.17674	1.29341	0.831617	1.38408	0.934074	0.810773	1.10016	0.735824	1.17807	1.35865	1.24988	1.16409	0.836489	1.22443	0.954391	1.37273	1.31342	1.36605	1.40203
	11.4296	1.03652	0.967054	1.09787	0.931149	1.34221	0.850198	1.03359	0.75748	1.0235	1.35892	1.32538	1.16611	1.15837	1.2805	1.47052	1.40307	1.04752	0.811486	0.808602	1.44611	1.02154	1.13381	0.692947	1.35635	0.766139	1.06361	0.991947	0.733063	0.985625	1.22588	1.27652	0.829852	1.33447	0.934186	0.808017	1.0783	0.715556	1.1199	1.377	1.21473	1.18769	0.805709	1.21143	0.934903	1.36926	1.29062	1.34423	1.34198
	11.463	1.04357	0.985489	1.10161	0.906923	1.39843	0.865585	1.00062	0.747674	1.00634	1.34588	1.27247	1.19083	1.1844	1.30336	1.45712	1.44977	1.07162	0.806995	0.822394	1.35848	0.989772	1.11908	0.700833	1.27349	0.756219	1.08221	0.977462	0.748645	0.942518	1.24843	1.30314	0.810881	1.32634	0.911246	0.799797	1.05024	0.71783	1.12018	1.34704	1.20326	1.20851	0.826054	1.20307	0.909323	1.32541	1.28192	1.331	1.3706
	11.4963	1.05161	0.967492	1.11473	0.917126	1.41354	0.840218	0.987808	0.742039	1.01611	1.34935	1.30006	1.18544	1.09925	1.26035	1.44147	1.42484	1.07012	0.841843	0.795389	1.36084	0.984146	1.1404	0.691614	1.3103	0.731864	1.06902	0.975546	0.716794	0.959327	1.23196	1.291	0.821091	1.33886	0.912659	0.820451	1.10206	0.727707	1.11675	1.34509	1.22616	1.16201	0.833199	1.22752	0.941587	1.32431	1.3194	1.39028	1.33981
	11.5296	0.998708	0.980165	1.09139	0.909381	1.36307	0.851621	1.00947	0.752426	1.02911	1.33313	1.31514	1.18438	1.1522	1.25595	1.44703	1.40922	1.06989	0.808813	0.787317	1.32128	1.00802	1.13768	0.698836	1.33677	0.748154	1.03029	0.964432	0.730402	0.962798	1.21293	1.29219	0.821628	1.29485	0.924277	0.80678	1.06852	0.675859	1.1501	1.36121	1.23961	1.16736	0.812272	1.20011	0.968779	1.28965	1.30895	1.31701	1.38325
	11.563	1.02674	0.978285	1.0831	0.920132	1.37726	0.838912	0.999263	0.732029	0.98614	1.33264	1.27007	1.17952	1.09627	1.28199	1.41566	1.41431	1.04966	0.794821	0.813919	1.28681	1.03289	1.09328	0.683976	1.3138	0.736611	1.04109	0.975086	0.73506	0.965977	1.21462	1.24402	0.85147	1.28823	0.883853	0.797003	1.05108	0.683935	1.12083	1.39817	1.21954	1.17097	0.798715	1.22377	0.951324	1.34952	1.31299	1.39444	1.41514
	11.5963	1.04003	0.967907	1.08644	0.900034	1.41674	0.855091	1.02098	0.749223	1.01404	1.29041	1.28438	1.19135	1.13209	1.3154	1.42365	1.40953	1.03877	0.812184	0.778049	1.34948	1.00484	1.13864	0.688966	1.31371	0.763181	1.06087	0.970609	0.718602	1.00715	1.22798	1.28389	0.845907	1.3235	0.909942	0.797279	1.09368	0.704007	1.13345	1.3406	1.22484	1.2126	0.835173	1.21537	0.913224	1.34781	1.29134	1.3489	1.39209
	11.6296	1.04669	0.967852	1.12488	0.88718	1.33762	0.840898	1.00417	0.719805	0.994828	1.31609	1.25048	1.16898	1.12752	1.27074	1.42906	1.43183	1.04777	0.822501	0.809125	1.38888	0.984237	1.12349	0.68195	1.36057	0.771786	1.03229	0.979445	0.729763	0.974896	1.18174	1.28155	0.826565	1.29693	0.912252	0.788981	1.10503	0.708314	1.04644	1.37683	1.21718	1.21649	0.793393	1.22467	0.901678	1.39611	1.27689	1.37631	1.37639
	11.663	1.03222	0.97395	1.08833	0.903998	1.34388	0.847668	0.979794	0.728065	0.973835	1.35308	1.25132	1.17001	1.12461	1.28454	1.45989	1.40537	1.04427	0.769662	0.839291	1.36887	0.989422	1.14678	0.670742	1.28529	0.77019	1.01553	0.975477	0.719446	0.947826	1.26374	1.31711	0.812924	1.31582	0.894077	0.79483	1.04724	0.661861	1.07598	1.36797	1.24315	1.1836	0.813641	1.23	0.939298	1.36556	1.3289	1.29411	1.34362
	11.6963	1.02595	0.978041	1.06665	0.909717	1.39321	0.857609	1.01036	0.730593	1.00183	1.31104	1.30177	1.19947	1.10415	1.28164	1.38927	1.39502	1.03349	0.822038	0.805157	1.39488	1.00879	1.11577	0.677936	1.33192	0.743133	1.03512	0.993875	0.736901	0.96735	1.21357	1.23752	0.833476	1.31641	0.909629	0.818312	1.08507	0.69894	1.10184	1.39256	1.27185	1.1583	0.799381	1.21089	0.977006	1.37923	1.29763	1.33687	1.32262
	11.7296	1.06006	0.985853	1.11531	0.897315	1.3555	0.830984	0.966948	0.716678	0.969731	1.33431	1.26469	1.17659	1.15375	1.26667	1.41179	1.41649	1.05019	0.804767	0.804406	1.31546	1.00456	1.10525	0.671526	1.2908	0.795763	1.02954	0.952443	0.724513	0.99414	1.19956	1.31001	0.807696	1.32489	0.952616	0.813714	1.03259	0.673057	1.18982	1.3752	1.24311	1.12425	0.821593	1.18314	0.9399	1.41765	1.29742	1.32026	1.36465
	11.7629	1.01042	0.97183	1.03349	0.874907	1.35702	0.834691	0.991405	0.732308	0.992805	1.29807	1.25607	1.16577	1.15576	1.29223	1.42556	1.36393	1.02735	0.796497	0.815501	1.33534	0.987336	1.08495	0.66414	1.26537	0.764016	1.03648	1.00442	0.714539	0.965676	1.24118	1.22849	0.840857	1.27536	0.897437	0.786961	1.06804	0.669587	1.0792	1.35881	1.22313	1.19646	0.797194	1.14878	0.906492	1.41318	1.22438	1.29278	1.33486
	11.7963	1.05677	0.978418	1.07043	0.911175	1.35524	0.835843	0.999758	0.71771	0.994692	1.34312	1.25876	1.19903	1.13171	1.27397	1.40658	1.41811	1.04027	0.814215	0.823683	1.33653	0.993409	1.13367	0.67111	1.29099	0.770645	1.01893	0.999293	0.706066	0.956026	1.20107	1.28329	0.807072	1.30624	0.894542	0.807198	1.08166	0.6983	1.12128	1.38334	1.24299	1.18764	0.778827	1.18709	0.931463	1.4031	1.28225	1.28389	1.34833
	11.8296	1.06394	0.967689	1.07089	0.890579	1.30728	0.883118	1.01801	0.720139	0.989273	1.30735	1.22443	1.13614	1.12551	1.23833	1.37767	1.42576	1.02456	0.790482	0.77893	1.32854	0.992253	1.12103	0.638509	1.31306	0.7414	1.0072	0.990474	0.70619	0.973574	1.23769	1.27201	0.818984	1.29573	0.904715	0.783092	1.04532	0.669979	1.07547	1.37147	1.23174	1.12389	0.777652	1.19759	0.891914	1.36858	1.29178	1.27882	1.3309
	11.863	1.03235	0.991751	1.09742	0.868466	1.27638	0.832845	0.98814	0.73049	0.955408	1.30979	1.27971	1.1858	1.14974	1.24158	1.37921	1.41121	1.02217	0.793181	0.797199	1.33282	0.989764	1.12995	0.65909	1.3347	0.738772	1.03363	1.00921	0.729287	0.983373	1.24987	1.22572	0.828865	1.2908	0.895743	0.809605	1.11335	0.698776	1.10579	1.30293	1.21406	1.16887	0.794646	1.18992	0.929665	1.34501	1.25252	1.28771	1.34713
	11.8963	1.01907	0.965182	1.08543	0.887419	1.36381	0.835755	1.00059	0.714567	0.994962	1.38431	1.25898	1.17101	1.13828	1.29987	1.42438	1.37861	1.02542	0.80729	0.781564	1.35138	0.945444	1.09852	0.657701	1.30509	0.760593	1.00924	0.957637	0.729346	0.958217	1.27679	1.27043	0.818198	1.27248	0.861324	0.814152	1.05216	0.652678	1.04281	1.33627	1.22222	1.11861	0.788336	1.18724	0.908235	1.34266	1.2709	1.30522	1.33024
	11.9297	1.06493	0.980892	1.08389	0.891483	1.33904	0.835691	1.03839	0.73544	0.963842	1.31933	1.26226	1.15726	1.13302	1.27406	1.43985	1.42177	1.02518	0.814652	0.817192	1.34427	0.982266	1.13356	0.656511	1.32191	0.788174	1.0244	0.943363	0.719555	0.97557	1.21893	1.27094	0.832041	1.27392	0.907625	0.794932	1.06704	0.67681	1.11984	1.35068	1.22413	1.17138	0.807396	1.2041	0.95148	1.34915	1.24802	1.28505	1.34171
	11.963	1.04122	0.984875	1.09889	0.885326	1.32117	0.8526	1.02573	0.70906	0.999393	1.3048	1.25899	1.17101	1.10355	1.26407	1.42952	1.40624	1.03415	0.804449	0.829225	1.31123	0.967447	1.13558	0.662832	1.26449	0.770833	1.05226	0.979341	0.721384	0.97759	1.2232	1.29517	0.803885	1.27941	0.897409	0.822622	1.0961	0.675137	1.10239	1.38536	1.18794	1.18328	0.791689	1.18504	0.922201	1.36199	1.26855	1.33362	1.35229
	11.9963	1.02802	0.976631	1.09577	0.883433	1.37537	0.844493	0.975797	0.73637	0.96655	1.23302	1.23723	1.13152	1.1136	1.26122	1.4506	1.38479	1.05409	0.81332	0.783805	1.38473	0.999679	1.13059	0.644438	1.30794	0.762349	1.03997	0.975758	0.69965	0.968132	1.27349	1.25156	0.844866	1.28912	0.882886	0.825796	1.06281	0.65557	1.09327	1.32664	1.18935	1.15826	0.801011	1.22331	0.911925	1.33508	1.2534	1.32561	1.31844
	12.0296	1.02905	0.959649	1.10346	0.866841	1.33369	0.84111	1.00939	0.720272	0.962681	1.33163	1.21293	1.1294	1.12723	1.27269	1.38762	1.39177	1.02847	0.784841	0.786528	1.3494	0.952961	1.11399	0.652953	1.31496	0.777845	1.03104	0.977211	0.679729	0.947515	1.1912	1.25849	0.828281	1.28045	0.918864	0.813335	1.06973	0.666033	1.09341	1.3468	1.2676	1.18902	0.789526	1.18111	0.897231	1.35592	1.23256	1.27273	1.31668
	12.063	1.03102	0.983268	1.08631	0.890827	1.30756	0.846813	1.05263	0.745435	0.969061	1.28212	1.24023	1.13554	1.1241	1.26929	1.44017	1.39698	1.02979	0.814902	0.814997	1.40334	0.962257	1.09861	0.65974	1.2713	0.786223	1.0241	0.967717	0.696085	0.955501	1.2008	1.26839	0.813374	1.25626	0.925297	0.796682	1.07913	0.668946	1.11392	1.35344	1.22754	1.17852	0.803453	1.206	0.978323	1.40192	1.27807	1.31892	1.33691
	12.0963	1.03832	0.962925	1.08917	0.89225	1.26264	0.836961	1.03657	0.7098	0.971967	1.30368	1.18893	1.14223	1.12672	1.29616	1.41621	1.40249	1.03055	0.760537	0.794547	1.39028	0.954561	1.10368	0.647574	1.2604	0.76884	1.01143	0.968458	0.704304	0.955772	1.22189	1.27154	0.836437	1.2575	0.898289	0.78413	1.12264	0.641963	1.12707	1.36789	1.19391	1.2169	0.784242	1.17779	0.91106	1.31206	1.19482	1.26077	1.34075
	12.1296	1.02236	0.971864	1.07049	0.875438	1.30993	0.863227	1.02839	0.724568	0.973586	1.36735	1.22997	1.11007	1.12665	1.28068	1.46891	1.37362	1.03614	0.763927	0.807171	1.36882	1.00362	1.11275	0.656122	1.25761	0.80867	1.01111	0.953523	0.719918	0.942972	1.22403	1.28988	0.851181	1.30082	0.908498	0.822616	1.06436	0.624979	1.036	1.33793	1.23688	1.17403	0.787228	1.16592	0.935474	1.36458	1.22665	1.36309	1.35324
	12.163	1.0336	0.960776	1.08783	0.869683	1.37014	0.836509	0.990657	0.706757	0.979398	1.38264	1.21665	1.1296	1.11211	1.24893	1.43216	1.3683	1.01501	0.797609	0.809871	1.44599	0.963232	1.11433	0.658619	1.28272	0.776739	1.02523	0.956895	0.691243	0.948453	1.23128	1.26635	0.847435	1.24573	0.879904	0.810922	1.11426	0.644044	1.11215	1.31909	1.20997	1.14199	0.769882	1.17968	0.881764	1.35372	1.2256	1.30776	1.33003
	12.1963	1.02777	0.951823	1.13041	0.847843	1.33011	0.83919	1.01166	0.715197	0.961482	1.30872	1.25746	1.12657	1.11615	1.2449	1.36697	1.39544	1.00569	0.785813	0.799577	1.43337	0.967698	1.1454	0.653499	1.29414	0.764749	1.00759	0.949948	0.703587	0.964752	1.24555	1.29384	0.842888	1.2809	0.874344	0.777259	1.05827	0.613172	1.05711	1.33342	1.19848	1.12149	0.789601	1.16612	0.97462	1.40521	1.25059	1.2927	1.36346
	12.2296	1.02218	0.975172	1.08337	0.871392	1.32142	0.834443	1.01717	0.699806	0.96822	1.27988	1.22836	1.1299	1.10712	1.23918	1.46497	1.38738	1.02048	0.76982	0.797305	1.37858	0.972225	1.09713	0.639308	1.27477	0.785838	0.979404	0.973795	0.697925	0.969874	1.18093	1.31432	0.776492	1.27821	0.878212	0.821473	1.0389	0.642895	1.10236	1.34995	1.20334	1.18504	0.779336	1.20885	0.949132	1.39068	1.25422	1.27844	1.37599
	12.2629	1.01567	0.976894	1.12716	0.832806	1.30636	0.823369	1.02482	0.687868	0.956462	1.29991	1.24547	1.11587	1.10764	1.28742	1.44744	1.41705	1.02497	0.774051	0.762152	1.45623	0.958787	1.10729	0.640195	1.25801	0.75363	1.00393	0.961229	0.700956	1.01344	1.24497	1.27854	0.805078	1.24148	0.885284	0.778305	1.0131	0.600373	1.08069	1.37076	1.1708	1.16364	0.775903	1.16206	0.924191	1.37876	1.21276	1.31419	1.37168
	12.2963	1.01828	0.954211	1.10301	0.832576	1.33452	0.816628	0.99906	0.689614	0.964933	1.2926	1.22106	1.12995	1.08584	1.2473	1.40182	1.3528	1.00757	0.80708	0.788498	1.36949	0.986126	1.13084	0.612926	1.26421	0.749304	1.00151	0.925333	0.690751	0.930686	1.19271	1.31226	0.80647	1.22581	0.86405	0.809609	1.02072	0.616539	1.0736	1.34498	1.16618	1.10468	0.765579	1.16548	0.915574	1.41379	1.20887	1.25354	1.34777
	12.3296	1.0433	0.939131	1.11784	0.86222	1.30111	0.856419	0.992937	0.703054	0.9575	1.23392	1.22388	1.11368	1.10622	1.25585	1.35231	1.3882	1.00428	0.784855	0.786842	1.42374	1.00599	1.13986	0.643971	1.27834	0.775477	1.00282	0.979009	0.70923	0.952219	1.22036	1.34153	0.846948	1.28011	0.854268	0.80091	1.05597	0.595599	1.03361	1.31982	1.22775	1.15393	0.79	1.19062	0.914832	1.40552	1.2612	1.32909	1.38422
	12.363	1.00546	0.942277	1.09587	0.836004	1.32992	0.831527	1.01436	0.678479	0.945824	1.23724	1.20468	1.07212	1.1283	1.27426	1.4225	1.33674	0.993245	0.776349	0.793411	1.37058	0.980229	1.09658	0.642284	1.29829	0.768332	0.999183	0.943301	0.668421	0.958355	1.2187	1.28585	0.804414	1.23967	0.840378	0.80166	1.05612	0.547634	1.13029	1.32682	1.17952	1.17252	0.784181	1.20198	0.925603	1.37217	1.23884	1.23963	1.35797
	12.3963	1.0163	0.957838	1.10623	0.822986	1.3707	0.82473	1.01462	0.684213	0.941984	1.25105	1.21371	1.09951	1.09849	1.21251	1.32963	1.34664	0.984979	0.777776	0.766182	1.38549	0.980074	1.12538	0.638309	1.25427	0.809441	0.969833	0.947375	0.669906	0.983495	1.23024	1.30847	0.819622	1.24088	0.857872	0.786818	1.0842	0.593218	1.08298	1.32277	1.17248	1.22	0.768376	1.21255	0.906919	1.38545	1.2334	1.30216	1.37645
	12.4296	1.01259	0.957142	1.11499	0.850187	1.35008	0.85205	1.0171	0.666366	0.937152	1.25122	1.21061	1.09576	1.07342	1.2368	1.37985	1.35087	0.998571	0.796481	0.811421	1.37534	1.00473	1.09229	0.617601	1.26282	0.769256	0.981808	0.939325	0.684104	0.955853	1.12389	1.28172	0.780048	1.22462	0.84984	0.791175	1.03412	0.587966	1.13606	1.33978	1.21183	1.16443	0.768881	1.184	0.91544	1.37636	1.21293	1.28484	1.35563
	12.463	1.03295	0.960027	1.11117	0.860711	1.31966	0.850248	1.02608	0.669384	0.958433	1.31745	1.21848	1.09858	1.11471	1.22918	1.3916	1.35039	1.03581	0.793185	0.784346	1.43878	1.01731	1.09422	0.648578	1.26212	0.761728	0.995826	0.975528	0.677681	0.942533	1.204	1.31134	0.814225	1.24332	0.845673	0.822209	1.03183	0.594998	1.0712	1.37587	1.25458	1.17763	0.786393	1.18717	0.920369	1.40736	1.26408	1.35409	1.36002
	12.4963	1.02801	0.970168	1.11594	0.84846	1.32745	0.826857	1.04273	0.656787	0.952467	1.24954	1.22286	1.10659	1.11418	1.22552	1.38611	1.35685	1.00449	0.768196	0.769836	1.42169	0.986303	1.08112	0.644454	1.23481	0.722627	0.961965	0.965118	0.669681	0.974141	1.15582	1.32788	0.836782	1.25021	0.829784	0.774405	1.04721	0.612504	1.08071	1.3624	1.23326	1.1426	0.76168	1.19421	0.92439	1.35751	1.22984	1.28911	1.3408
	12.5296	1.04028	0.943174	1.08296	0.843505	1.31941	0.802988	1.0244	0.651546	0.957683	1.26673	1.2296	1.10075	1.10624	1.21171	1.38111	1.35023	1.00094	0.763759	0.76965	1.40516	0.9816	1.08258	0.650583	1.26588	0.7758	0.979282	0.961325	0.682343	0.93418	1.21777	1.25549	0.799159	1.24436	0.839508	0.761805	1.01325	0.575205	1.04557	1.33381	1.23055	1.19661	0.757786	1.18877	0.903737	1.3912	1.21176	1.35039	1.35996
	12.563	1.03624	0.97006	1.08068	0.863413	1.35416	0.832532	1.04306	0.671904	0.968318	1.25482	1.19233	1.10472	1.13627	1.20687	1.36607	1.3624	1.0246	0.799151	0.771676	1.49416	1.03966	1.10104	0.642527	1.27822	0.795272	0.952565	0.954635	0.689985	0.944808	1.20003	1.28736	0.829176	1.23704	0.824176	0.812941	1.05747	0.577278	1.04857	1.32575	1.20912	1.15234	0.78326	1.18718	0.932412	1.40556	1.24656	1.31128	1.34726
	12.5963	1.02269	0.959432	1.06941	0.841028	1.34797	0.821537	1.04483	0.645904	0.949765	1.27509	1.22468	1.08316	1.12484	1.20132	1.35965	1.3962	1.00543	0.767566	0.764379	1.37295	0.988499	1.09837	0.64554	1.24708	0.744944	0.973755	0.977695	0.655038	0.938824	1.19051	1.29754	0.821122	1.26531	0.827697	0.797969	1.04655	0.536548	1.049	1.34824	1.20262	1.16707	0.748374	1.1685	0.906506	1.36295	1.21293	1.35759	1.3413
	12.6296	1.03754	0.934591	1.08847	0.852212	1.30203	0.85279	1.02042	0.673989	0.959509	1.27482	1.19585	1.12709	1.04431	1.19499	1.39498	1.36675	1.00133	0.79468	0.754141	1.31436	1.00701	1.08207	0.649625	1.283	0.780952	0.978183	0.967691	0.66552	0.948431	1.14118	1.29124	0.79854	1.26283	0.825054	0.773242	1.06845	0.584515	1.13875	1.32867	1.20581	1.13578	0.76307	1.17902	0.964731	1.39528	1.24144	1.33587	1.30418
	12.663	1.03258	0.950749	1.06793	0.846221	1.34545	0.84752	1.03699	0.65197	0.974736	1.22782	1.20221	1.07587	1.0439	1.23162	1.42206	1.32969	1.02156	0.780214	0.765691	1.37805	0.98304	1.07872	0.633883	1.3148	0.77673	0.982857	0.963421	0.65572	0.929	1.14196	1.25124	0.847455	1.25464	0.812851	0.79754	1.04285	0.5603	1.07477	1.33371	1.19571	1.13745	0.739047	1.20217	0.916223	1.38095	1.20758	1.29641	1.32618
	12.6963	1.04256	0.963765	1.05244	0.846265	1.27845	0.816912	1.00043	0.646184	0.937897	1.26694	1.17526	1.07205	1.06899	1.20116	1.39621	1.33871	0.999792	0.762979	0.781332	1.33707	0.954135	1.09342	0.645874	1.25448	0.749736	0.974514	0.963045	0.667159	0.925632	1.18936	1.25332	0.756122	1.1981	0.796946	0.801618	1.02648	0.541171	0.998402	1.31431	1.1993	1.15452	0.76902	1.17579	0.877801	1.34764	1.19414	1.31403	1.3567
	12.7296	1.05062	0.948952	1.09132	0.853533	1.27335	0.834059	1.02969	0.627923	0.964354	1.27537	1.24808	1.07437	1.07459	1.2191	1.37577	1.32503	1.02177	0.778064	0.769454	1.43403	0.969034	1.08978	0.655465	1.28268	0.727249	0.970993	0.955511	0.659755	0.900579	1.13438	1.25657	0.802282	1.26782	0.765879	0.821141	1.06021	0.559712	0.999432	1.36231	1.20516	1.13095	0.774187	1.14785	0.904331	1.38262	1.18833	1.33271	1.32875
	12.763	1.03976	0.964598	1.09766	0.845183	1.37211	0.840543	1.00389	0.640001	0.9367	1.24318	1.18997	1.09183	1.0574	1.21574	1.41553	1.31343	1.01729	0.77456	0.74459	1.37298	0.977754	1.12498	0.649716	1.23138	0.776824	0.996068	0.966887	0.653603	0.930126	1.15788	1.25474	0.814928	1.23894	0.798237	0.790312	1.07965	0.546522	1.0809	1.34653	1.18014	1.16118	0.765982	1.16345	0.937874	1.39474	1.21883	1.26326	1.37061
	12.7963	1.02869	0.959327	1.09213	0.8574	1.35294	0.818869	1.04491	0.658086	0.951222	1.23487	1.22854	1.07832	1.08931	1.23482	1.40314	1.33671	0.990177	0.789415	0.737417	1.37174	0.98847	1.09706	0.632272	1.18946	0.750064	0.955965	0.931418	0.658889	0.953247	1.14885	1.24517	0.827848	1.25345	0.80466	0.798426	1.04682	0.556208	1.07497	1.34853	1.22361	1.16997	0.77121	1.17377	0.93556	1.3554	1.23441	1.31943	1.3571
	12.8297	1.02783	0.957272	1.08415	0.827134	1.25306	0.817792	1.0511	0.616424	0.92081	1.21261	1.18873	1.01524	1.00879	1.13347	1.31854	1.28882	0.980801	0.77871	0.760424	1.35213	0.93157	1.01927	0.605195	1.18566	0.672135	0.94438	0.929621	0.631231	0.909234	1.1559	1.27513	0.802573	1.27915	0.820974	0.823226	1.14616	0.541595	1.04897	1.4085	1.28981	1.25166	0.791535	1.14339	0.970105	1.45067	1.26249	1.36714	1.37936
	12.863	1.08861	0.991297	1.1381	0.854442	1.34908	0.865645	1.05305	0.673599	0.996106	1.33406	1.21697	1.08784	1.07785	1.27434	1.39314	1.33729	1.02574	0.775584	0.772271	1.3366	0.989365	1.07883	0.626664	1.24627	0.737672	0.943639	0.962844	0.636682	0.925081	1.17141	1.24491	0.797154	1.25584	0.762007	0.746501	1.02881	0.588131	1.03098	1.32121	1.20999	1.16527	0.766499	1.15856	0.936118	1.32439	1.22171	1.29339	1.45388
	12.8963	1.04892	0.974549	1.0722	0.817421	1.30366	0.858157	1.04278	0.633179	0.961486	1.25285	1.21607	1.03202	1.05847	1.18464	1.35929	1.24956	0.992314	0.782189	0.748165	1.26974	0.929326	1.0285	0.60294	1.22996	0.71637	0.916054	0.936295	0.638793	0.901498	1.196	1.24059	0.75003	1.27352	0.760605	0.777587	1.08099	0.52448	0.981754	1.36908	1.21893	1.18024	0.786716	1.13747	0.953489	1.34322	1.26574	1.3851	1.48528
	12.9296	1.01978	0.930469	1.07514	0.817779	1.23002	0.79322	0.972254	0.619163	0.944363	1.21198	1.09844	1.04276	1.06058	1.19572	1.33	1.28516	0.988174	0.757261	0.752851	1.27447	0.955172	1.08081	0.612664	1.18596	0.737214	0.916161	0.930427	0.636227	0.886686	1.12516	1.21528	0.799151	1.21891	0.752291	0.755999	1.10417	0.521474	0.967421	1.30862	1.17257	1.14622	0.76563	1.13124	0.934663	1.30615	1.11243	1.24591	1.37368
	12.963	1.06131	0.956074	1.11434	0.834603	1.24345	0.841521	0.983496	0.634821	0.932723	1.21346	1.16227	1.06648	1.06438	1.21813	1.38812	1.34162	1.02104	0.772322	0.754501	1.32444	0.948708	1.04516	0.633343	1.17723	0.752528	0.910778	0.950114	0.626249	0.916281	1.16518	1.26606	0.78482	1.22832	0.729812	0.756763	1.08105	0.51313	0.996688	1.34321	1.16996	1.12984	0.764595	1.16727	0.897117	1.34945	1.195	1.27508	1.39327
	12.9963	1.03197	0.968274	1.07101	0.86936	1.28885	0.804366	0.989057	0.639154	0.901768	1.24029	1.20103	1.05263	1.10726	1.24656	1.43514	1.3202	1.01324	0.74995	0.748604	1.37436	0.940677	1.08893	0.661191	1.22872	0.80112	0.929944	0.966666	0.654574	0.91355	1.24567	1.23896	0.806975	1.22398	0.719565	0.761418	1.04032	0.544393	1.0521	1.34367	1.19637	1.18186	0.785823	1.16788	0.917999	1.36545	1.19613	1.31457	1.40229
	13.0297	1.04036	0.95778	1.1159	0.850173	1.32966	0.836769	1.02809	0.626244	0.933309	1.22932	1.18752	1.07435	1.08735	1.21756	1.4128	1.31654	1.03383	0.760448	0.75534	1.31446	0.986842	1.0878	0.636017	1.22952	0.759251	0.944834	0.967806	0.652118	0.901691	1.23877	1.22031	0.816525	1.2696	0.742577	0.784774	1.08581	0.535244	1.03203	1.36398	1.23174	1.16912	0.783574	1.17319	0.942274	1.32378	1.20692	1.31245	1.40867
	13.0629	1.04336	0.95335	1.13018	0.84614	1.35796	0.824845	1.02197	0.646093	0.952	1.27913	1.21313	1.0685	1.10144	1.25783	1.44533	1.36643	1.03791	0.772761	0.799676	1.41657	0.944339	1.12556	0.648437	1.22196	0.796235	0.954613	0.981147	0.659444	0.924183	1.22224	1.24991	0.81207	1.29591	0.736351	0.821304	1.10842	0.542391	1.0745	1.35112	1.24166	1.16377	0.798702	1.14834	0.937378	1.38989	1.24657	1.32732	1.41873
	13.0963	1.03005	0.946995	1.10984	0.815852	1.29691	0.839085	1.00584	0.626606	0.909797	1.28799	1.22016	1.07988	1.08637	1.23418	1.42474	1.28675	1.01474	0.754325	0.76356	1.27908	0.944841	1.11325	0.612413	1.23545	0.762347	0.952658	0.917509	0.617329	0.935027	1.19899	1.23164	0.811119	1.2498	0.700149	0.739516	1.11667	0.515555	1.01518	1.33887	1.1772	1.13514	0.77906	1.1613	0.906116	1.31806	1.19192	1.2754	1.35032
	13.1296	1.04394	0.918763	1.08803	0.828847	1.28405	0.820788	0.970441	0.626112	0.927803	1.28706	1.19919	1.07181	1.09018	1.25046	1.39008	1.34533	1.02559	0.760987	0.736887	1.31541	0.975474	1.13861	0.610107	1.18518	0.761982	0.963105	0.940255	0.614363	0.896267	1.16448	1.18971	0.815567	1.2368	0.717339	0.753972	1.08671	0.491744	1.07658	1.3086	1.21535	1.12038	0.745668	1.15114	0.927256	1.29957	1.18848	1.28065	1.3449
	13.163	1.02416	0.917099	1.09802	0.822107	1.29718	0.844714	0.9721	0.595997	0.900537	1.31883	1.17016	1.05377	1.09906	1.19207	1.39732	1.27931	1.0344	0.762712	0.723495	1.32413	0.958641	1.09953	0.607084	1.21876	0.781224	0.927882	0.934344	0.607819	0.910197	1.14134	1.16243	0.783697	1.22706	0.68547	0.744566	1.07739	0.474072	1.04416	1.3706	1.1863	1.10845	0.76117	1.11184	0.924714	1.36705	1.22747	1.23982	1.33869
	13.1963	1.01714	0.923876	1.05947	0.777631	1.25708	0.796143	0.933377	0.586524	0.927955	1.28008	1.15635	1.05711	1.08302	1.20173	1.3455	1.31124	1.0095	0.7472	0.736302	1.27942	0.953405	1.06641	0.575928	1.21927	0.736047	0.932937	0.930411	0.588703	0.870432	1.10376	1.13623	0.764225	1.27019	0.662512	0.755364	1.06689	0.465433	1.03402	1.32797	1.22377	1.08881	0.736182	1.13273	0.92787	1.26029	1.18406	1.22778	1.32805
	13.2296	1.00121	0.904565	1.04091	0.770987	1.22585	0.805952	0.926481	0.586026	0.920205	1.25558	1.16502	1.03892	1.07489	1.19758	1.30319	1.30086	1.00862	0.734453	0.717567	1.24945	0.909091	1.07572	0.560237	1.19271	0.74379	0.94345	0.913374	0.579628	0.855925	1.11022	1.13983	0.777849	1.2119	0.650375	0.73761	1.10022	0.493895	0.9731	1.30859	1.19143	1.0668	0.721169	1.13592	0.904939	1.27441	1.18955	1.23469	1.30647
	13.2629	0.994871	0.90081	1.02385	0.772887	1.15694	0.815947	0.919359	0.571416	0.885983	1.23408	1.11797	1.03849	1.0473	1.14048	1.32702	1.25575	0.997689	0.738032	0.74297	1.15783	0.916664	1.04517	0.521181	1.21116	0.711098	0.892222	0.88273	0.554103	0.846661	1.11943	1.11359	0.776584	1.19387	0.645788	0.704647	1.05855	0.447927	0.975476	1.26947	1.16538	1.05294	0.689655	1.10723	0.925852	1.22345	1.14075	1.22655	1.31618
	13.2963	0.977203	0.890904	1.00713	0.746921	1.20215	0.767565	0.899645	0.554352	0.90606	1.22549	1.09664	1.03093	1.00759	1.15597	1.30803	1.20889	0.975347	0.731698	0.713441	1.23886	0.881784	1.04732	0.517433	1.17612	0.707989	0.905466	0.890446	0.542639	0.852744	1.05377	1.04142	0.768317	1.19384	0.63301	0.717772	1.09003	0.456182	0.968354	1.30954	1.17218	1.05827	0.659779	1.07191	0.847967	1.24119	1.1437	1.18905	1.25408
	13.3296	0.964805	0.872065	1.01574	0.735098	1.20195	0.785616	0.879982	0.553886	0.897072	1.17807	1.11669	1.01578	1.01903	1.12075	1.27564	1.24024	0.973848	0.713966	0.675733	1.11762	0.874989	1.02403	0.496642	1.13182	0.721903	0.882003	0.871089	0.52375	0.843648	1.01744	1.02217	0.748613	1.17165	0.625047	0.694552	1.02282	0.443939	0.951444	1.28973	1.13122	1.01917	0.65811	1.04883	0.894647	1.20729	1.0959	1.16012	1.23622
	13.363	0.928499	0.848461	0.91259	0.702781	1.14686	0.737669	0.846033	0.524454	0.852226	1.14212	1.08046	0.955587	0.98719	1.12895	1.22476	1.15371	0.98481	0.651751	0.674026	1.09685	0.856653	1.02228	0.471258	1.09868	0.72208	0.87729	0.836981	0.49862	0.83436	1.00095	0.990611	0.750457	1.14585	0.603641	0.69711	1.06614	0.448093	0.922286	1.2234	1.1016	0.978441	0.600381	1.01175	0.85524	1.16657	1.0806	1.13111	1.20595
	13.3963	0.90642	0.827584	0.921189	0.67651	1.11385	0.737836	0.840263	0.52986	0.850012	1.13358	1.06433	0.938376	0.980458	1.10953	1.18395	1.15904	0.979029	0.685137	0.671027	1.01972	0.828949	1.02319	0.468578	1.12048	0.682614	0.846721	0.820404	0.488556	0.834904	1.00956	0.945728	0.733187	1.13917	0.595031	0.652836	1.00491	0.429422	0.847821	1.19778	1.1038	0.918911	0.606777	1.01564	0.824276	1.17039	1.09185	1.09368	1.23508
	13.4296	0.888135	0.817771	0.931853	0.652898	1.06851	0.755845	0.818976	0.519038	0.828327	1.07404	0.995774	0.948471	1.00604	1.04365	1.1338	1.10658	0.945261	0.673221	0.622985	1.00284	0.841632	0.996137	0.462161	1.10846	0.699883	0.834062	0.792519	0.472201	0.79805	0.971377	0.946213	0.705529	1.12346	0.584311	0.633084	0.958757	0.405196	0.856149	1.18083	1.12609	0.912845	0.575379	0.989729	0.840409	1.16968	1.08186	1.14003	1.19589
	13.463	0.874646	0.799904	0.897989	0.618904	1.02303	0.692891	0.778938	0.480586	0.789895	1.06186	1.00043	0.938323	0.935439	1.01796	1.08626	1.06239	0.936298	0.61786	0.656317	0.959149	0.780284	0.986523	0.440306	1.06346	0.666286	0.821359	0.745263	0.469857	0.771308	0.948995	0.889559	0.694731	1.07784	0.569922	0.614655	0.978755	0.409528	0.825671	1.16027	1.03897	0.861404	0.543354	0.954001	0.77414	1.09889	0.999931	1.05618	1.15053
	13.4963	0.840363	0.796092	0.864258	0.615734	0.985217	0.708632	0.801773	0.492743	0.77216	1.01927	0.997236	0.938241	0.916584	1.01892	1.09545	1.0218	0.916388	0.629818	0.62754	0.925749	0.786201	0.96864	0.427028	1.05487	0.646276	0.788833	0.763675	0.458244	0.773735	0.921006	0.852075	0.679804	1.05484	0.549237	0.592235	0.964682	0.413223	0.746002	1.15491	1.06862	0.848861	0.528854	0.94768	0.79795	1.09492	0.996088	1.04461	1.16178
	13.5296	0.814923	0.781024	0.84346	0.593386	0.999078	0.661398	0.76072	0.492802	0.731052	0.994824	0.962602	0.934252	0.909532	0.960157	1.01531	1.02715	0.912358	0.599363	0.590813	0.888239	0.736384	0.957854	0.433497	1.02448	0.617847	0.763724	0.726851	0.447095	0.761548	0.912558	0.845946	0.664286	1.0273	0.552607	0.573819	0.984389	0.412846	0.726853	1.14466	1.02899	0.845574	0.51294	0.943895	0.776488	1.06486	0.988681	1.02007	1.1194
	13.563	0.805352	0.764574	0.833762	0.580934	0.940284	0.645168	0.733998	0.47567	0.750299	0.97941	0.912841	0.860538	0.887552	0.967294	1.01561	0.991745	0.881879	0.607486	0.610952	0.839176	0.71201	0.920346	0.411379	1.02557	0.639119	0.754538	0.69201	0.431627	0.744591	0.90125	0.830892	0.652245	1.0278	0.544743	0.565115	0.940354	0.401876	0.728479	1.13962	1.02655	0.830972	0.492293	0.918591	0.789553	1.05329	0.958164	1.01337	1.07961
	13.5963	0.788741	0.749309	0.809286	0.549476	0.909691	0.624907	0.726014	0.482896	0.705757	0.981616	0.896964	0.851923	0.874281	0.94804	0.98645	0.971039	0.912796	0.582063	0.582501	0.774578	0.723077	0.918011	0.41693	1.02607	0.618262	0.740697	0.690992	0.445711	0.737386	0.852024	0.803524	0.632757	1.01277	0.531688	0.55777	0.918624	0.419519	0.710319	1.12495	1.02852	0.7524	0.479462	0.880883	0.736487	1.07275	0.946947	1.01209	1.0749
	13.6296	0.741928	0.722426	0.767036	0.552765	0.887684	0.603627	0.678776	0.461721	0.680634	0.929111	0.900955	0.807223	0.833711	0.920295	0.966436	0.923242	0.876331	0.576347	0.56518	0.786303	0.686288	0.896495	0.402249	0.95614	0.593231	0.712319	0.655668	0.416787	0.719218	0.845518	0.800269	0.63346	0.974689	0.525882	0.538614	0.892602	0.400014	0.698872	1.08721	1.00729	0.735497	0.454707	0.834848	0.744769	1.02625	0.92118	0.965545	1.0533
	13.663	0.723568	0.70864	0.759437	0.540517	0.845424	0.575542	0.664851	0.468628	0.669795	0.917881	0.881275	0.81187	0.836566	0.880649	0.932607	0.891891	0.838057	0.555863	0.564611	0.770226	0.65775	0.855819	0.392	0.973302	0.565977	0.711827	0.662179	0.429371	0.723217	0.851813	0.766616	0.604648	0.952102	0.516605	0.50438	0.879819	0.410091	0.664587	1.06695	0.993028	0.708933	0.451697	0.83089	0.724887	0.99853	0.890146	0.919044	1.0335
	13.6963	0.700562	0.706187	0.723633	0.517356	0.841479	0.563663	0.647211	0.462454	0.642476	0.849522	0.857754	0.784091	0.800574	0.883204	0.896938	0.86041	0.848435	0.549043	0.556275	0.737956	0.630343	0.861503	0.411857	0.916315	0.550454	0.705298	0.645153	0.41357	0.687562	0.781943	0.730494	0.595668	0.923935	0.506985	0.513576	0.838946	0.391258	0.623158	1.04613	0.946321	0.677649	0.439739	0.804753	0.708131	1.01429	0.847174	0.943476	1.0244
	13.7296	0.671846	0.678343	0.687159	0.496204	0.783577	0.534998	0.612793	0.437867	0.609746	0.86583	0.829435	0.77748	0.802954	0.848758	0.827343	0.820621	0.818459	0.527349	0.536849	0.737502	0.606625	0.82527	0.395216	0.900012	0.534083	0.649331	0.618803	0.411235	0.676507	0.763199	0.730592	0.576675	0.897469	0.519842	0.506136	0.833647	0.398071	0.606017	1.04124	0.936305	0.671118	0.428517	0.768267	0.691358	0.989925	0.816276	0.916481	0.973454
	13.763	0.669568	0.663487	0.687567	0.479454	0.759844	0.537715	0.613226	0.448093	0.609723	0.811434	0.815239	0.746742	0.752461	0.81673	0.834031	0.810101	0.821415	0.529128	0.528005	0.700099	0.583866	0.851982	0.397764	0.898339	0.527275	0.648987	0.612478	0.42982	0.673193	0.774772	0.713915	0.553801	0.886028	0.50532	0.504991	0.824331	0.386433	0.581718	1.03026	0.955885	0.649984	0.40951	0.762018	0.639174	0.962656	0.821702	0.907613	0.952978
	13.7963	0.635928	0.640676	0.670097	0.476963	0.724905	0.50814	0.611008	0.430457	0.574395	0.788727	0.788583	0.718404	0.739618	0.796092	0.799969	0.798982	0.818801	0.499505	0.489702	0.68415	0.588178	0.832971	0.390199	0.869647	0.521256	0.639074	0.575046	0.412181	0.66351	0.743892	0.717671	0.525772	0.871732	0.487124	0.48717	0.831043	0.397292	0.574049	0.994066	0.925377	0.611149	0.408166	0.744779	0.692313	0.971146	0.769388	0.887859	0.938956
	13.8296	0.625991	0.639883	0.629904	0.465985	0.707274	0.476623	0.572074	0.429547	0.557768	0.771078	0.787058	0.715639	0.735831	0.800223	0.769454	0.767985	0.810266	0.498815	0.492717	0.669584	0.572933	0.790188	0.392991	0.876522	0.489501	0.619181	0.566747	0.429318	0.666923	0.702785	0.673386	0.542947	0.847493	0.497641	0.48674	0.836201	0.394782	0.575601	0.985678	0.899899	0.619805	0.408605	0.714712	0.63991	0.900632	0.77106	0.875754	0.89443
	13.8629	0.615395	0.624549	0.597867	0.446033	0.714246	0.492616	0.554219	0.426383	0.551936	0.755445	0.753595	0.680142	0.711114	0.750723	0.755396	0.74824	0.791188	0.464512	0.472151	0.664496	0.54578	0.790899	0.384241	0.83224	0.494758	0.600088	0.567276	0.422702	0.656996	0.697931	0.65831	0.525604	0.83802	0.498722	0.479802	0.766708	0.394063	0.558706	0.985718	0.923196	0.599654	0.40851	0.697821	0.649999	0.924341	0.728884	0.839448	0.892555
	13.8963	0.609452	0.615458	0.596628	0.452486	0.71454	0.468677	0.547429	0.431537	0.558076	0.748944	0.751684	0.657871	0.712714	0.717742	0.712782	0.726546	0.76143	0.470442	0.458159	0.65446	0.523166	0.79688	0.384518	0.770231	0.492867	0.586709	0.544843	0.432092	0.623914	0.67104	0.665256	0.531168	0.812289	0.487209	0.483638	0.730977	0.404942	0.569698	0.955888	0.830585	0.580368	0.40656	0.680916	0.63244	0.903188	0.718557	0.842063	0.869605
	13.9296	0.59267	0.607939	0.582709	0.437459	0.681354	0.469511	0.546732	0.439907	0.542578	0.723126	0.747225	0.64951	0.696405	0.736666	0.693342	0.720472	0.760792	0.480823	0.449851	0.642892	0.508579	0.777287	0.377859	0.758611	0.476974	0.56983	0.527919	0.443014	0.634601	0.652906	0.663731	0.502505	0.778701	0.496259	0.48165	0.74111	0.415908	0.525699	0.953634	0.884369	0.577727	0.40615	0.67858	0.623276	0.845068	0.702928	0.804733	0.847706
	13.963	0.58897	0.582024	0.587627	0.432789	0.633226	0.446672	0.542751	0.434591	0.542486	0.721401	0.729097	0.642705	0.646325	0.702537	0.67641	0.693799	0.742777	0.449767	0.462898	0.639593	0.49729	0.72663	0.389376	0.749227	0.485236	0.558537	0.535234	0.434634	0.621025	0.638703	0.659395	0.485933	0.7578	0.507054	0.463478	0.712887	0.392549	0.523232	0.933825	0.828672	0.544859	0.40019	0.652911	0.591501	0.871032	0.659478	0.765445	0.836826
	13.9963	0.5765	0.574352	0.543804	0.429301	0.636883	0.442058	0.539078	0.41497	0.514226	0.651717	0.693863	0.634721	0.659513	0.709694	0.686726	0.660356	0.736843	0.457191	0.457261	0.589571	0.497787	0.752402	0.402001	0.726469	0.454055	0.540249	0.525761	0.414817	0.614096	0.602478	0.633902	0.501859	0.74633	0.490279	0.463458	0.656621	0.39088	0.535304	0.938033	0.854631	0.567848	0.402576	0.628577	0.597934	0.853744	0.644571	0.795011	0.804564
	14.0296	0.587665	0.57587	0.561074	0.415862	0.65901	0.447365	0.54424	0.42017	0.5097	0.654664	0.710217	0.602423	0.650103	0.688516	0.661865	0.671928	0.727197	0.438337	0.456385	0.634693	0.497933	0.748744	0.379429	0.706053	0.462777	0.541659	0.519608	0.42419	0.625315	0.609896	0.64056	0.469733	0.743533	0.485389	0.4533	0.653338	0.353405	0.502693	0.905604	0.825427	0.54179	0.391557	0.621243	0.579699	0.814762	0.648488	0.770636	0.778133
	14.063	0.585484	0.563335	0.571814	0.420482	0.610886	0.435034	0.518678	0.416017	0.519667	0.629316	0.7097	0.595797	0.615762	0.652907	0.649783	0.647849	0.704583	0.442309	0.43401	0.652309	0.465084	0.74024	0.378006	0.689525	0.488439	0.531911	0.509146	0.424152	0.617165	0.59939	0.616513	0.463771	0.70662	0.49921	0.437096	0.634035	0.378857	0.510711	0.910151	0.832064	0.552938	0.379341	0.591535	0.567273	0.837349	0.620917	0.720771	0.759566
	14.0963	0.57002	0.554473	0.539548	0.414633	0.620305	0.424923	0.524566	0.404224	0.495333	0.619969	0.674831	0.570955	0.636315	0.644998	0.662765	0.622038	0.684824	0.433119	0.435749	0.585962	0.474476	0.68076	0.35961	0.660697	0.453333	0.510802	0.508485	0.420122	0.596996	0.619555	0.606501	0.452536	0.696487	0.486599	0.43935	0.594003	0.389353	0.533067	0.849733	0.799181	0.538253	0.376436	0.589844	0.560438	0.79016	0.617073	0.737	0.738668
	14.1296	0.573244	0.541436	0.535139	0.415725	0.610092	0.408391	0.526783	0.406319	0.502133	0.628988	0.668829	0.564873	0.613835	0.645388	0.63109	0.624049	0.678976	0.434427	0.449167	0.595073	0.467349	0.674932	0.36315	0.671278	0.455615	0.50946	0.495727	0.424643	0.590903	0.588848	0.600585	0.455499	0.679955	0.486852	0.443635	0.616238	0.370498	0.498306	0.869433	0.770124	0.543647	0.376581	0.573087	0.560395	0.808291	0.594104	0.738112	0.72939
	14.163	0.557989	0.5303	0.522253	0.415113	0.622814	0.406209	0.50918	0.404204	0.50032	0.627863	0.64924	0.565007	0.6015	0.629385	0.630743	0.613395	0.668743	0.441404	0.434038	0.586061	0.467782	0.712981	0.381073	0.61989	0.460061	0.513708	0.483939	0.416412	0.577659	0.573765	0.61316	0.462525	0.667512	0.476725	0.447579	0.591541	0.370011	0.494336	0.837485	0.79061	0.540371	0.382595	0.579545	0.541927	0.761199	0.575184	0.74398	0.699426
	14.1963	0.556673	0.532777	0.513181	0.404967	0.595012	0.41567	0.502759	0.410056	0.479593	0.611878	0.651004	0.562156	0.581767	0.622405	0.623397	0.613402	0.653053	0.429489	0.420986	0.57699	0.447315	0.654489	0.357327	0.590698	0.455364	0.504844	0.480593	0.416126	0.565742	0.549066	0.593216	0.440199	0.645683	0.472409	0.4245	0.5546	0.382534	0.482902	0.836649	0.763407	0.513455	0.377165	0.579158	0.523181	0.75437	0.580537	0.730102	0.691827
	14.2296	0.540977	0.528652	0.523324	0.419902	0.588486	0.392912	0.512747	0.406671	0.492922	0.616921	0.641447	0.555092	0.580317	0.622222	0.615082	0.589985	0.625573	0.43479	0.416606	0.563688	0.464619	0.638279	0.363036	0.613079	0.43859	0.493862	0.476147	0.43027	0.564275	0.554787	0.593068	0.444687	0.642652	0.47585	0.43413	0.531637	0.386999	0.516848	0.838129	0.771757	0.52586	0.378928	0.562896	0.526672	0.740314	0.573909	0.696813	0.678898
	14.263	0.552981	0.519407	0.516702	0.404092	0.572585	0.403873	0.513399	0.404834	0.493421	0.625817	0.63489	0.553607	0.572084	0.611113	0.596093	0.597009	0.644641	0.417688	0.420397	0.577666	0.456399	0.635528	0.359931	0.582328	0.450966	0.497526	0.470892	0.436298	0.554181	0.548252	0.582689	0.441859	0.618135	0.46735	0.431009	0.546288	0.38191	0.4928	0.833033	0.717995	0.549778	0.377299	0.537033	0.539775	0.730903	0.553638	0.716298	0.673893
	14.2963	0.543719	0.520865	0.514759	0.406726	0.56396	0.407301	0.520338	0.405145	0.488828	0.594723	0.65139	0.541002	0.566012	0.599227	0.594161	0.56735	0.61511	0.420856	0.453217	0.559726	0.448411	0.635566	0.365455	0.575464	0.463305	0.494676	0.471404	0.42728	0.563264	0.521441	0.590784	0.424345	0.622524	0.470653	0.433671	0.521466	0.362024	0.468466	0.810983	0.719717	0.52708	0.372832	0.530462	0.514664	0.709086	0.555292	0.705004	0.684918
	14.3297	0.550122	0.514751	0.526461	0.403295	0.572443	0.397121	0.516961	0.41717	0.471432	0.57459	0.649073	0.558263	0.575927	0.590629	0.571024	0.569766	0.615517	0.414519	0.417283	0.562456	0.45171	0.619943	0.373462	0.565615	0.430177	0.494919	0.456801	0.441043	0.554211	0.555819	0.576045	0.44546	0.61679	0.474453	0.434974	0.503512	0.388434	0.510186	0.804531	0.682765	0.523537	0.367221	0.54093	0.509353	0.702446	0.55762	0.693376	0.644347
	14.3629	0.535377	0.513462	0.508507	0.399707	0.553763	0.396127	0.492867	0.412794	0.483714	0.614771	0.624321	0.530301	0.575384	0.577181	0.609905	0.582137	0.608989	0.430098	0.41821	0.58894	0.435434	0.614713	0.360291	0.544595	0.443253	0.504601	0.458054	0.441484	0.554851	0.562564	0.563584	0.436207	0.599573	0.453858	0.426849	0.507601	0.369468	0.492826	0.816191	0.681869	0.506515	0.382421	0.532869	0.508464	0.687525	0.530859	0.694978	0.628994
	14.3963	0.526864	0.502001	0.499698	0.388525	0.56342	0.389303	0.501605	0.411304	0.480595	0.58102	0.641411	0.541201	0.551279	0.572409	0.582954	0.565002	0.580062	0.429877	0.408686	0.587439	0.439626	0.589298	0.36836	0.542121	0.464108	0.502352	0.451343	0.433791	0.544035	0.565009	0.551419	0.438652	0.592068	0.457011	0.416068	0.487556	0.390131	0.503019	0.814078	0.669674	0.51632	0.371876	0.519494	0.524959	0.675776	0.531689	0.65396	0.639197
	14.4296	0.530417	0.502485	0.503721	0.399454	0.554496	0.378194	0.502736	0.409582	0.476175	0.576056	0.626495	0.522695	0.542971	0.599971	0.57943	0.573821	0.585401	0.407115	0.398379	0.561422	0.440672	0.613018	0.364602	0.512824	0.433921	0.48617	0.443638	0.425883	0.546141	0.530073	0.547827	0.424751	0.592697	0.469595	0.44312	0.471576	0.379142	0.462891	0.795791	0.658998	0.512026	0.374507	0.518557	0.488172	0.678707	0.520334	0.669517	0.633563
	14.4629	0.534636	0.503329	0.497468	0.389668	0.57953	0.398017	0.503373	0.414081	0.468877	0.581914	0.630924	0.530346	0.548962	0.569638	0.595229	0.563452	0.585038	0.417225	0.41479	0.551311	0.433406	0.617319	0.374436	0.532672	0.461144	0.497459	0.455874	0.418275	0.541675	0.541206	0.550198	0.415092	0.585217	0.472059	0.426106	0.473747	0.376226	0.48844	0.784686	0.685167	0.51918	0.387281	0.509446	0.50413	0.684869	0.524379	0.652315	0.61797
	14.4963	0.530417	0.484215	0.4907	0.396652	0.55225	0.374956	0.497623	0.413336	0.463878	0.566536	0.637551	0.524102	0.547444	0.574178	0.590208	0.552846	0.568108	0.407881	0.403609	0.558349	0.434869	0.587525	0.371246	0.512913	0.440957	0.49296	0.446238	0.423643	0.544774	0.528266	0.546849	0.429333	0.564474	0.464355	0.425178	0.469034	0.363536	0.484946	0.775742	0.645695	0.527009	0.362088	0.512057	0.514187	0.668764	0.522844	0.643241	0.613805
	14.5296	0.525657	0.498879	0.477368	0.390588	0.556014	0.385853	0.492995	0.40221	0.472948	0.575109	0.619148	0.513573	0.565788	0.570273	0.571168	0.549589	0.561003	0.415081	0.421931	0.550567	0.424457	0.590698	0.366238	0.522657	0.437131	0.498665	0.436285	0.421199	0.525193	0.521389	0.543379	0.423235	0.566354	0.44738	0.439983	0.448737	0.388457	0.479928	0.762103	0.680547	0.510965	0.374961	0.510809	0.510387	0.656653	0.512021	0.651536	0.606354
	14.563	0.539856	0.491164	0.478221	0.389991	0.570096	0.391567	0.470499	0.415539	0.455624	0.571153	0.632831	0.512477	0.539575	0.568189	0.576308	0.536311	0.550491	0.403507	0.389359	0.552043	0.443983	0.586017	0.377156	0.48775	0.450216	0.501758	0.432432	0.435226	0.529986	0.496504	0.526496	0.424004	0.562697	0.466144	0.431234	0.459131	0.354622	0.464986	0.750555	0.65383	0.502134	0.364942	0.503936	0.47385	0.662189	0.514308	0.649889	0.607657
	14.5963	0.534333	0.486968	0.484025	0.380325	0.568405	0.394036	0.482539	0.404867	0.468228	0.547018	0.628986	0.518849	0.536798	0.560205	0.559291	0.547664	0.559584	0.40511	0.393812	0.551711	0.440976	0.562778	0.36258	0.503835	0.436714	0.499449	0.448909	0.44527	0.530881	0.496873	0.532429	0.414399	0.552233	0.46605	0.432819	0.448231	0.355809	0.478999	0.749659	0.667343	0.502752	0.37699	0.514262	0.471275	0.670566	0.500469	0.618453	0.597307
	14.6296	0.52524	0.479375	0.469339	0.389603	0.552358	0.368322	0.45169	0.409812	0.460476	0.549938	0.622597	0.514544	0.527413	0.560869	0.549539	0.534819	0.551078	0.391603	0.386132	0.561284	0.420112	0.559291	0.357448	0.489506	0.4565	0.494431	0.442776	0.43267	0.530604	0.497164	0.537811	0.414964	0.565264	0.457527	0.422808	0.471964	0.357992	0.488648	0.756329	0.636271	0.480688	0.370544	0.498427	0.47883	0.635161	0.478859	0.643095	0.582393
	14.663	0.509949	0.479247	0.46503	0.38514	0.518948	0.390981	0.476576	0.402893	0.450089	0.559719	0.613535	0.511822	0.5226	0.558944	0.564662	0.538208	0.544338	0.404254	0.388201	0.546258	0.423478	0.56898	0.365594	0.49669	0.43005	0.48875	0.434417	0.455125	0.514356	0.461391	0.530991	0.391117	0.544358	0.455587	0.417915	0.435127	0.354894	0.480763	0.753828	0.619548	0.514357	0.384252	0.49153	0.504271	0.634239	0.480129	0.649694	0.573761
	14.6963	0.531462	0.486644	0.460874	0.390329	0.565547	0.379586	0.488643	0.407356	0.463247	0.554254	0.610652	0.504557	0.535868	0.551945	0.584558	0.52877	0.537012	0.415147	0.390635	0.565666	0.420679	0.574536	0.359622	0.4815	0.459996	0.486904	0.426025	0.438593	0.521537	0.503382	0.526027	0.396222	0.549583	0.432822	0.422627	0.43479	0.375833	0.489766	0.723075	0.628201	0.498281	0.370124	0.486195	0.481063	0.621309	0.486093	0.620556	0.577021
	14.7296	0.517276	0.478462	0.454576	0.386836	0.567447	0.378042	0.483018	0.402248	0.462952	0.549117	0.631256	0.492828	0.536845	0.542613	0.579633	0.536542	0.537109	0.406322	0.394208	0.554142	0.421638	0.544603	0.353723	0.482137	0.471491	0.492508	0.429669	0.439975	0.524954	0.486666	0.521253	0.391646	0.545967	0.440897	0.416066	0.440044	0.356778	0.450234	0.735173	0.634067	0.515948	0.367621	0.474676	0.481866	0.627773	0.492458	0.630496	0.581848
	14.763	0.508861	0.480372	0.456616	0.391342	0.558426	0.39258	0.469822	0.405282	0.460944	0.522839	0.613706	0.511311	0.534498	0.555839	0.559353	0.536062	0.535478	0.402721	0.411765	0.538847	0.434707	0.567488	0.354019	0.486821	0.475768	0.490005	0.424265	0.447097	0.518151	0.495453	0.526457	0.411887	0.538109	0.443323	0.417448	0.451291	0.361248	0.460301	0.739745	0.623658	0.49622	0.374576	0.486635	0.45856	0.612566	0.478591	0.604618	0.586847
	14.7963	0.525878	0.473969	0.435667	0.389352	0.542211	0.393146	0.465897	0.401018	0.462929	0.543291	0.624688	0.513105	0.543148	0.525329	0.567493	0.533623	0.549465	0.414047	0.409041	0.552448	0.4044	0.590507	0.368266	0.467757	0.452493	0.499996	0.425544	0.436627	0.527517	0.478516	0.525921	0.398064	0.533232	0.450752	0.417395	0.426169	0.35175	0.465056	0.749466	0.614655	0.471561	0.372075	0.47469	0.478311	0.639899	0.497423	0.641993	0.571155
	14.8296	0.516624	0.476499	0.44692	0.378182	0.531988	0.390352	0.462144	0.397733	0.456983	0.553462	0.603336	0.498588	0.509892	0.534638	0.560608	0.535032	0.522747	0.418527	0.392463	0.540347	0.426992	0.568513	0.352885	0.476148	0.447298	0.482291	0.426249	0.427502	0.508109	0.448435	0.504191	0.403155	0.527447	0.419311	0.430811	0.423689	0.355697	0.455093	0.740665	0.599161	0.488828	0.366233	0.483586	0.45887	0.625315	0.477312	0.621586	0.563949
	14.8629	0.522769	0.476877	0.437948	0.382494	0.548028	0.382175	0.470866	0.411995	0.46452	0.538847	0.602985	0.499501	0.521717	0.538633	0.577283	0.521901	0.528665	0.406917	0.390083	0.552117	0.421492	0.573856	0.355979	0.492839	0.467421	0.504245	0.413433	0.428731	0.516434	0.493593	0.512259	0.412679	0.527715	0.440416	0.414993	0.447014	0.353379	0.468437	0.731058	0.604066	0.475368	0.379603	0.491503	0.458521	0.615677	0.480432	0.601872	0.562067
	14.8963	0.514324	0.480768	0.436992	0.376605	0.527689	0.372212	0.476187	0.407769	0.451072	0.544972	0.612584	0.503039	0.505369	0.545815	0.551016	0.534938	0.51279	0.38893	0.390765	0.569726	0.425941	0.561923	0.370359	0.485573	0.435307	0.51851	0.422807	0.419458	0.506846	0.4812	0.521267	0.393563	0.517021	0.460164	0.425665	0.442486	0.371657	0.464874	0.730291	0.605769	0.489754	0.37813	0.483038	0.448204	0.637025	0.488447	0.617689	0.561643
	14.9296	0.522547	0.48118	0.428507	0.386914	0.514826	0.381662	0.478328	0.401864	0.46337	0.515687	0.614725	0.496481	0.526927	0.531519	0.564988	0.533397	0.523513	0.405285	0.383827	0.528588	0.414192	0.577142	0.361703	0.481656	0.454296	0.525542	0.412798	0.435747	0.509084	0.492262	0.494909	0.408072	0.531748	0.448407	0.422629	0.429052	0.355882	0.458199	0.719368	0.603402	0.494771	0.381547	0.484575	0.444555	0.593133	0.491099	0.630148	0.55887
	14.963	0.511038	0.47612	0.432594	0.376553	0.522582	0.378554	0.466357	0.411768	0.447737	0.529285	0.620831	0.492306	0.506674	0.519399	0.551512	0.539419	0.523752	0.381312	0.402045	0.520454	0.410638	0.565847	0.364493	0.49515	0.452166	0.508216	0.405323	0.440756	0.512847	0.466459	0.507666	0.399071	0.515397	0.426503	0.408742	0.434501	0.360072	0.449704	0.712048	0.594561	0.498623	0.36555	0.472399	0.45655	0.583118	0.47989	0.613141	0.556254
	14.9962	0.516568	0.474945	0.430488	0.388585	0.506695	0.369348	0.479574	0.39198	0.452154	0.526091	0.591587	0.498102	0.506495	0.519612	0.560922	0.526922	0.512702	0.411568	0.404797	0.516988	0.416533	0.577868	0.358517	0.486802	0.476639	0.512319	0.418356	0.434503	0.506284	0.47852	0.500492	0.400791	0.518932	0.436216	0.413584	0.439657	0.367019	0.504883	0.731911	0.581922	0.491407	0.373204	0.482195	0.441216	0.606268	0.478024	0.595624	0.541556
	15.0297	0.517348	0.470246	0.430926	0.396498	0.523774	0.378218	0.474867	0.405172	0.463159	0.545242	0.608821	0.504714	0.509507	0.530081	0.550471	0.543158	0.535359	0.401474	0.415527	0.546315	0.433471	0.582613	0.350192	0.479854	0.477623	0.502943	0.418644	0.459041	0.500347	0.479212	0.525191	0.398269	0.523552	0.430666	0.416025	0.441056	0.354723	0.488587	0.725679	0.578983	0.473159	0.384784	0.481595	0.455157	0.606648	0.474493	0.640408	0.542351
	15.063	0.52149	0.460333	0.432316	0.37526	0.51446	0.363395	0.459421	0.401392	0.446887	0.522972	0.627114	0.500051	0.503138	0.523491	0.54946	0.522218	0.512568	0.408654	0.400474	0.552645	0.421683	0.570977	0.351954	0.467642	0.44552	0.514066	0.420234	0.453755	0.486803	0.448015	0.510504	0.400109	0.51747	0.433764	0.416745	0.426202	0.35406	0.461744	0.702359	0.57864	0.477857	0.36735	0.459984	0.436054	0.583508	0.472041	0.595567	0.549008
	15.0963	0.527016	0.473136	0.449955	0.396857	0.52522	0.372132	0.452736	0.400813	0.444419	0.531613	0.594557	0.502223	0.498108	0.53151	0.542987	0.513411	0.515265	0.408649	0.397929	0.57901	0.426244	0.559073	0.363304	0.484342	0.468156	0.491756	0.411805	0.47229	0.498854	0.474004	0.501977	0.400896	0.509689	0.425523	0.409536	0.41681	0.378875	0.472938	0.71735	0.59477	0.465202	0.38368	0.471832	0.447886	0.576441	0.468773	0.590649	0.550768
	15.1296	0.526544	0.463002	0.436734	0.377368	0.514263	0.366309	0.470999	0.398754	0.457244	0.520822	0.597711	0.502268	0.513822	0.528406	0.561941	0.522592	0.522938	0.39351	0.411365	0.537827	0.4136	0.57139	0.354014	0.483406	0.482238	0.490883	0.412669	0.458578	0.501299	0.483489	0.511014	0.389	0.513815	0.427168	0.413666	0.434869	0.355605	0.459203	0.724411	0.580928	0.462648	0.374502	0.476211	0.432152	0.566734	0.46422	0.589805	0.549943
	15.1629	0.528734	0.46197	0.436991	0.383496	0.50921	0.377422	0.467885	0.394863	0.449241	0.515376	0.584723	0.498327	0.494575	0.511278	0.545683	0.515501	0.508147	0.380492	0.417034	0.538024	0.431404	0.55246	0.369467	0.492794	0.477654	0.498439	0.415164	0.435553	0.496812	0.468412	0.487867	0.390769	0.513618	0.415195	0.414996	0.427439	0.362532	0.449864	0.702124	0.572569	0.451985	0.374141	0.466625	0.447217	0.580076	0.465208	0.593785	0.546872
	15.1963	0.532524	0.468458	0.439613	0.38939	0.515894	0.37929	0.456917	0.398435	0.445352	0.523653	0.616955	0.48636	0.491249	0.510616	0.554253	0.512946	0.506975	0.392382	0.395806	0.543373	0.423404	0.558724	0.364076	0.481947	0.465844	0.501518	0.419382	0.435794	0.518075	0.450078	0.507294	0.403024	0.528523	0.432867	0.411596	0.413991	0.360565	0.457201	0.702049	0.588452	0.471782	0.383735	0.462217	0.42931	0.589683	0.464055	0.584052	0.554575
	15.2296	0.530314	0.45541	0.436634	0.384992	0.520991	0.381981	0.441866	0.410683	0.455447	0.502132	0.593857	0.501917	0.501297	0.521946	0.538218	0.517304	0.508126	0.397456	0.415113	0.516826	0.426622	0.5623	0.360842	0.478107	0.476063	0.502835	0.402849	0.435604	0.496514	0.461594	0.491968	0.391617	0.499297	0.43135	0.397807	0.437948	0.358926	0.464253	0.710151	0.590406	0.459605	0.391864	0.462753	0.419271	0.55488	0.452572	0.567228	0.542248
	15.263	0.518068	0.462929	0.438465	0.381902	0.505215	0.355394	0.450766	0.407627	0.457242	0.557467	0.587729	0.498064	0.519687	0.516096	0.550185	0.523525	0.505003	0.373233	0.407156	0.5213	0.435569	0.571921	0.363544	0.457929	0.482403	0.499123	0.39257	0.442407	0.492933	0.477577	0.495155	0.391524	0.514444	0.429993	0.419488	0.435389	0.34436	0.473799	0.681767	0.599672	0.475922	0.404914	0.459895	0.419683	0.574265	0.454695	0.574925	0.537034
	15.2963	0.526793	0.462828	0.468059	0.400348	0.511727	0.353148	0.455766	0.412455	0.459235	0.516171	0.612917	0.497356	0.495588	0.526942	0.57177	0.517572	0.516455	0.392892	0.413908	0.543879	0.419794	0.586701	0.375	0.48211	0.492003	0.477069	0.405249	0.445607	0.502058	0.476244	0.49134	0.397228	0.529499	0.43082	0.412695	0.428184	0.353069	0.459173	0.688378	0.579592	0.462269	0.39224	0.461493	0.42391	0.572924	0.468671	0.58131	0.543329
	15.3297	0.52165	0.446964	0.471725	0.384492	0.528948	0.375245	0.449662	0.40601	0.44439	0.528957	0.586837	0.491245	0.495456	0.520716	0.541312	0.502099	0.490557	0.385444	0.405074	0.499875	0.424935	0.569939	0.349771	0.472127	0.485748	0.485044	0.410405	0.446371	0.494029	0.483236	0.496048	0.387188	0.510109	0.423063	0.411397	0.430766	0.362069	0.4502	0.678374	0.595111	0.464685	0.384442	0.46619	0.44139	0.545858	0.463606	0.583879	0.544054
	15.363	0.515633	0.450532	0.460144	0.382801	0.528489	0.381949	0.458283	0.398075	0.44937	0.523144	0.577743	0.501129	0.491209	0.507225	0.555482	0.502285	0.484731	0.390257	0.386018	0.512469	0.423275	0.563166	0.363511	0.462474	0.456161	0.461297	0.399819	0.449084	0.490052	0.494761	0.494234	0.396841	0.516766	0.433811	0.417468	0.423825	0.373709	0.461911	0.669824	0.574849	0.481683	0.379758	0.470742	0.457013	0.546793	0.451755	0.581896	0.523981
	15.3963	0.515239	0.453745	0.472451	0.368725	0.485511	0.372037	0.44842	0.397426	0.438459	0.51688	0.578013	0.495032	0.490422	0.487547	0.53638	0.486396	0.487827	0.387261	0.407518	0.487466	0.422326	0.559567	0.360307	0.457502	0.492706	0.476643	0.391144	0.418328	0.512088	0.474835	0.487721	0.378138	0.509604	0.420541	0.394209	0.421263	0.338451	0.447421	0.669169	0.574186	0.467259	0.378751	0.439743	0.412642	0.547445	0.461189	0.568502	0.533513
	15.4296	0.519635	0.454865	0.474751	0.394774	0.502255	0.369844	0.452664	0.402104	0.455544	0.518419	0.599384	0.485684	0.479264	0.480255	0.542488	0.50117	0.482522	0.385927	0.393357	0.494776	0.430831	0.556623	0.351728	0.450475	0.489201	0.495249	0.395452	0.415132	0.494079	0.469937	0.491432	0.374213	0.518225	0.420972	0.409766	0.4286	0.364132	0.461191	0.663167	0.572206	0.450161	0.373828	0.461483	0.429978	0.550656	0.450549	0.56999	0.538624
	15.463	0.512706	0.455043	0.489597	0.383876	0.489101	0.352467	0.449554	0.407477	0.463322	0.511702	0.588733	0.495594	0.498781	0.493244	0.543324	0.483993	0.500131	0.391096	0.413939	0.514783	0.421144	0.547403	0.355672	0.474131	0.487908	0.500129	0.409367	0.418595	0.49889	0.475391	0.49575	0.392143	0.51086	0.44587	0.405335	0.412663	0.362742	0.458973	0.668507	0.577243	0.437894	0.384687	0.468803	0.439002	0.555651	0.466861	0.583377	0.53817
	15.4963	0.512061	0.452034	0.476843	0.377181	0.516079	0.376378	0.454947	0.400341	0.46154	0.525236	0.588076	0.491578	0.499752	0.497969	0.533144	0.498261	0.503161	0.397481	0.387629	0.491859	0.425211	0.556357	0.354134	0.465431	0.495576	0.495268	0.386347	0.410304	0.503824	0.468723	0.490805	0.39044	0.504905	0.445762	0.412906	0.407782	0.341856	0.474302	0.683961	0.570379	0.483332	0.383124	0.45829	0.437044	0.554409	0.441147	0.645636	0.530521
	15.5296	0.525213	0.447972	0.485625	0.379647	0.501775	0.380798	0.465838	0.408877	0.446116	0.494414	0.571495	0.498903	0.514917	0.491139	0.525665	0.4955	0.483912	0.37903	0.409357	0.51287	0.41597	0.571598	0.357442	0.480261	0.493442	0.536237	0.396289	0.411187	0.491586	0.477724	0.494317	0.376384	0.512977	0.426993	0.416351	0.40092	0.354679	0.42002	0.667309	0.58203	0.454713	0.38342	0.456937	0.410568	0.53159	0.453778	0.69733	0.531588
	15.563	0.523734	0.44994	0.460162	0.381024	0.516399	0.374299	0.458072	0.404899	0.441331	0.491816	0.583489	0.490532	0.501244	0.493525	0.532498	0.487882	0.48714	0.389977	0.380334	0.512519	0.425366	0.548308	0.361361	0.470473	0.465415	0.531335	0.416221	0.405742	0.49722	0.495968	0.494782	0.370136	0.515041	0.418619	0.38567	0.407369	0.360046	0.452601	0.675836	0.583178	0.477817	0.379021	0.461404	0.433194	0.564186	0.450417	0.74223	0.526216
	15.5963	0.521881	0.443945	0.455974	0.383987	0.502569	0.37086	0.445857	0.385371	0.443277	0.505353	0.574402	0.506034	0.48935	0.490651	0.538027	0.485908	0.488581	0.383604	0.393011	0.500978	0.418177	0.543219	0.348072	0.455064	0.462923	0.53362	0.397566	0.398005	0.505358	0.477022	0.487204	0.375218	0.512286	0.418605	0.403581	0.424577	0.361168	0.453155	0.6753	0.572094	0.463429	0.383263	0.447285	0.42631	0.537284	0.441382	0.851555	0.529963
	15.6296	0.519387	0.444039	0.467268	0.371365	0.501489	0.361542	0.450372	0.396771	0.46023	0.516552	0.584809	0.503303	0.510387	0.481084	0.536054	0.491546	0.501807	0.386416	0.391496	0.506364	0.411418	0.555551	0.355157	0.462819	0.483542	0.559396	0.390419	0.388969	0.490571	0.533033	0.499693	0.381842	0.515029	0.432875	0.397226	0.422976	0.350057	0.442603	0.659855	0.558352	0.466923	0.392888	0.45923	0.434485	0.557984	0.452969	0.865057	0.523237
	15.663	0.512868	0.441326	0.462109	0.374965	0.49117	0.357817	0.450826	0.399822	0.443844	0.494096	0.565114	0.487758	0.480066	0.490633	0.535555	0.486831	0.480995	0.378159	0.402354	0.495325	0.426886	0.54619	0.360639	0.455922	0.468192	0.54356	0.401807	0.38603	0.502864	0.517947	0.488935	0.382864	0.497113	0.418669	0.401683	0.390546	0.34511	0.446587	0.676564	0.566215	0.472324	0.397251	0.452846	0.424058	0.522658	0.44607	0.873733	0.518502
	15.6963	0.513186	0.442342	0.478517	0.37707	0.506534	0.365572	0.429613	0.406033	0.460113	0.479973	0.581406	0.507545	0.496293	0.490689	0.548591	0.473072	0.493717	0.379482	0.405833	0.498873	0.417062	0.549691	0.361523	0.46973	0.478176	0.565383	0.409346	0.381911	0.497611	0.524409	0.498515	0.375024	0.505738	0.43608	0.409188	0.426215	0.358679	0.415787	0.660189	0.566911	0.482903	0.405263	0.452036	0.418355	0.535753	0.45163	0.918847	0.525313
	15.7296	0.508164	0.448971	0.48847	0.373302	0.506708	0.3717	0.453813	0.394004	0.455908	0.498862	0.577057	0.506225	0.500921	0.478988	0.54984	0.48615	0.484333	0.389236	0.39739	0.502316	0.422381	0.540144	0.34865	0.476211	0.470392	0.554368	0.398769	0.378115	0.487432	0.495296	0.490019	0.382685	0.518654	0.447143	0.394746	0.403762	0.370944	0.453976	0.672105	0.577344	0.47075	0.412804	0.466472	0.423682	0.541277	0.450022	0.928444	0.52072
	15.763	0.502073	0.44062	0.477752	0.387199	0.502238	0.374912	0.434589	0.393605	0.445405	0.4912	0.569155	0.499761	0.516397	0.478958	0.532849	0.478982	0.47797	0.396506	0.394478	0.503569	0.425869	0.529275	0.358335	0.439098	0.464216	0.551524	0.393502	0.368025	0.498127	0.509876	0.497132	0.381202	0.499181	0.448802	0.401493	0.399015	0.367503	0.45448	0.653016	0.546347	0.445475	0.413329	0.449281	0.388173	0.518609	0.450348	0.901513	0.523239
	15.7963	0.496315	0.442817	0.491243	0.378423	0.50018	0.372888	0.431397	0.393654	0.458164	0.507453	0.578482	0.497589	0.47596	0.490871	0.542095	0.477167	0.476805	0.394187	0.425353	0.486385	0.400546	0.535464	0.348627	0.450912	0.481177	0.554019	0.379075	0.374047	0.51232	0.560658	0.490172	0.390617	0.507711	0.430738	0.392023	0.43203	0.352595	0.46148	0.664819	0.547017	0.457861	0.424859	0.450533	0.414326	0.517161	0.443083	0.89251	0.529161
	15.8296	0.511231	0.444475	0.487325	0.389241	0.505667	0.359807	0.449295	0.394952	0.439296	0.497209	0.58752	0.515714	0.508268	0.474206	0.537253	0.488672	0.480285	0.386242	0.399209	0.498193	0.417881	0.549597	0.353115	0.433769	0.477221	0.539662	0.384415	0.370345	0.496824	0.49346	0.498148	0.38221	0.495532	0.448133	0.397144	0.405961	0.36744	0.438467	0.66231	0.575842	0.448952	0.435421	0.462097	0.410933	0.524375	0.457077	0.850943	0.534864
	15.8629	0.520399	0.437621	0.490235	0.377482	0.497514	0.360739	0.433568	0.396314	0.447367	0.488175	0.576563	0.492652	0.473079	0.490099	0.529544	0.484759	0.48131	0.387311	0.418087	0.495468	0.402618	0.56335	0.346294	0.453298	0.487215	0.537475	0.389854	0.361098	0.490937	0.526173	0.494095	0.383717	0.497576	0.419781	0.389693	0.408216	0.366499	0.44405	0.647816	0.586209	0.48122	0.439408	0.447824	0.423481	0.508823	0.450042	0.842918	0.523301
	15.8963	0.515955	0.428133	0.472561	0.376111	0.503286	0.372501	0.435785	0.389317	0.434616	0.501414	0.584411	0.49457	0.478819	0.469086	0.521318	0.480706	0.480211	0.379996	0.390194	0.478753	0.395758	0.536241	0.354867	0.434333	0.478972	0.517753	0.390044	0.360338	0.495304	0.509229	0.480106	0.37158	0.492817	0.427302	0.39065	0.412263	0.354195	0.428325	0.640548	0.54369	0.467055	0.431341	0.453348	0.417043	0.50301	0.44358	0.843342	0.541631
	15.9296	0.522287	0.433542	0.464809	0.374547	0.49566	0.357974	0.436626	0.389864	0.436695	0.494703	0.588054	0.497918	0.481687	0.479892	0.549599	0.475012	0.487404	0.391061	0.393169	0.472304	0.411298	0.556674	0.337544	0.440923	0.479747	0.504108	0.381484	0.368453	0.518008	0.530484	0.484181	0.380585	0.496399	0.428591	0.402591	0.429949	0.342126	0.431425	0.648095	0.56212	0.462278	0.429729	0.445156	0.412445	0.500363	0.449808	0.809672	0.53935
	15.963	0.505573	0.43851	0.463721	0.386658	0.501667	0.362752	0.441915	0.38419	0.459451	0.484218	0.568247	0.504278	0.494238	0.478296	0.537459	0.482419	0.487025	0.386631	0.377432	0.490401	0.414802	0.55437	0.349103	0.462558	0.46933	0.492075	0.391982	0.364209	0.508037	0.538218	0.49603	0.38505	0.497259	0.424255	0.385871	0.431482	0.364314	0.428726	0.615052	0.543715	0.484977	0.441849	0.444808	0.423125	0.508055	0.440433	0.84343	0.544326
	15.9962	0.516934	0.437226	0.458264	0.373006	0.488129	0.365158	0.424598	0.382554	0.447511	0.494783	0.574022	0.489011	0.4791	0.481462	0.523004	0.480304	0.480219	0.383354	0.405681	0.50047	0.407964	0.566846	0.361724	0.4433	0.477027	0.47385	0.371073	0.364274	0.512661	0.556979	0.470515	0.372709	0.504499	0.422037	0.395382	0.404688	0.360975	0.455657	0.624313	0.536238	0.46584	0.449002	0.461787	0.417413	0.517274	0.43707	0.827067	0.555879
	16.0296	0.515067	0.439409	0.455862	0.373971	0.487229	0.34976	0.421869	0.386061	0.440674	0.488992	0.560235	0.495436	0.482822	0.485299	0.553608	0.475245	0.472216	0.378955	0.407062	0.499901	0.405413	0.569946	0.343818	0.449238	0.459368	0.473052	0.391215	0.360443	0.497256	0.528103	0.481466	0.380187	0.48862	0.430381	0.396241	0.423328	0.375748	0.433739	0.622895	0.546063	0.462621	0.436775	0.45325	0.418585	0.476962	0.435983	0.815571	0.5514
	16.063	0.51641	0.440742	0.451424	0.375372	0.503539	0.366556	0.440507	0.396553	0.43891	0.495542	0.559185	0.47994	0.486966	0.487334	0.522593	0.479479	0.46828	0.381968	0.39103	0.488226	0.398549	0.559944	0.351973	0.435466	0.475381	0.459359	0.388687	0.370489	0.505534	0.533932	0.485036	0.385878	0.479657	0.420363	0.404387	0.403802	0.354639	0.44531	0.628722	0.554168	0.462384	0.4478	0.452865	0.411101	0.510746	0.43564	0.830645	0.546877
	16.0963	0.507548	0.434589	0.47078	0.383049	0.488221	0.367899	0.438863	0.39161	0.441092	0.493943	0.569965	0.482806	0.488881	0.494101	0.524738	0.493884	0.476516	0.384811	0.396665	0.504813	0.409614	0.559414	0.347451	0.42737	0.479539	0.469264	0.405419	0.353934	0.50114	0.521279	0.480719	0.372109	0.496269	0.434064	0.39175	0.410615	0.347759	0.45037	0.638168	0.538156	0.470574	0.449053	0.466025	0.413003	0.50485	0.420225	0.791559	0.549743
	16.1296	0.509497	0.431406	0.466565	0.375115	0.495654	0.362354	0.43051	0.397614	0.435759	0.481757	0.569632	0.484615	0.48214	0.478118	0.52313	0.470016	0.477367	0.393472	0.394641	0.495605	0.418069	0.565221	0.355546	0.435235	0.467932	0.467659	0.391395	0.364486	0.492253	0.566048	0.481809	0.366605	0.489885	0.432204	0.407322	0.388911	0.336922	0.445793	0.636897	0.552032	0.452513	0.44525	0.458772	0.413996	0.479956	0.425669	0.811378	0.556162
	16.163	0.511845	0.434713	0.469505	0.379199	0.499289	0.364627	0.439496	0.394261	0.435252	0.508811	0.563265	0.49069	0.480106	0.477075	0.524254	0.460606	0.483517	0.378762	0.396685	0.485314	0.419706	0.564749	0.354952	0.454599	0.470344	0.472118	0.399241	0.359708	0.485333	0.549767	0.48774	0.385055	0.496509	0.428947	0.403716	0.406391	0.360884	0.444788	0.632706	0.555543	0.439286	0.456179	0.459009	0.400536	0.494579	0.436145	0.784616	0.560046
	16.1963	0.523341	0.431835	0.474073	0.379991	0.496252	0.374707	0.428257	0.385681	0.437948	0.500437	0.5457	0.495697	0.50014	0.471699	0.528376	0.493338	0.479613	0.395142	0.376251	0.490586	0.408337	0.539642	0.365944	0.439272	0.489408	0.471929	0.395752	0.365452	0.503759	0.534998	0.489866	0.37463	0.488383	0.436403	0.413989	0.417702	0.379427	0.458033	0.625235	0.57014	0.464376	0.43749	0.45334	0.409047	0.503119	0.433261	0.758125	0.558364
	16.2296	0.503986	0.430834	0.459811	0.37543	0.488757	0.359918	0.426642	0.391279	0.438813	0.4969	0.560282	0.477751	0.47537	0.475425	0.513391	0.471383	0.481561	0.387381	0.405625	0.495581	0.421784	0.555987	0.348627	0.443773	0.466896	0.453611	0.38993	0.359365	0.508512	0.57328	0.49149	0.372837	0.493345	0.418059	0.422483	0.414612	0.348991	0.41116	0.629776	0.566193	0.459644	0.447589	0.460177	0.399358	0.50635	0.427408	0.760101	0.551417
	16.263	0.507592	0.433709	0.449193	0.368922	0.510441	0.367051	0.451645	0.376567	0.439842	0.491797	0.535079	0.483977	0.480618	0.47555	0.514939	0.473554	0.488393	0.382178	0.391439	0.48327	0.419284	0.552993	0.344478	0.455145	0.47997	0.457988	0.391045	0.361526	0.519894	0.570419	0.490702	0.377588	0.487691	0.438972	0.399613	0.402589	0.338296	0.449957	0.62388	0.542679	0.458868	0.422675	0.436555	0.401894	0.50871	0.41632	0.741861	0.558121
	16.2963	0.508522	0.435725	0.461028	0.378815	0.48413	0.359438	0.443821	0.379063	0.44592	0.485199	0.550994	0.469588	0.497044	0.484135	0.525406	0.478642	0.477325	0.377134	0.398795	0.480779	0.417589	0.563859	0.348934	0.436004	0.471726	0.461237	0.388837	0.362094	0.497458	0.547357	0.47572	0.386401	0.483053	0.428468	0.387317	0.397492	0.345452	0.426593	0.6174	0.55242	0.449516	0.410446	0.460973	0.407178	0.496939	0.415817	0.762308	0.562952
	16.3296	0.497909	0.429518	0.454983	0.366625	0.495887	0.357801	0.441919	0.385732	0.43487	0.489514	0.535735	0.478829	0.498164	0.45606	0.526117	0.479719	0.470423	0.382224	0.405113	0.509719	0.408878	0.575501	0.35143	0.433381	0.509373	0.444729	0.380324	0.354707	0.509808	0.58807	0.479056	0.374124	0.480817	0.433728	0.401185	0.404192	0.337482	0.436074	0.619671	0.550673	0.436679	0.413466	0.453109	0.396405	0.489471	0.411435	0.762547	0.563507
	16.363	0.512081	0.431784	0.460925	0.386303	0.478041	0.36652	0.438128	0.390577	0.444925	0.494068	0.564919	0.491463	0.459506	0.47191	0.516604	0.474087	0.476704	0.381885	0.391834	0.49556	0.412009	0.585683	0.358779	0.46048	0.475878	0.446964	0.39042	0.357459	0.499259	0.601688	0.489199	0.382251	0.504313	0.430447	0.408656	0.402873	0.36403	0.447155	0.632544	0.555403	0.450208	0.412333	0.459576	0.41832	0.482698	0.419535	0.738868	0.581087
	16.3963	0.503135	0.428912	0.449288	0.37326	0.491913	0.358705	0.443426	0.38354	0.43484	0.484798	0.548549	0.486425	0.473456	0.471722	0.502298	0.480937	0.470818	0.379669	0.411513	0.504271	0.414836	0.568699	0.340349	0.458947	0.457907	0.439578	0.392877	0.362482	0.497661	0.603567	0.476044	0.364822	0.483046	0.434943	0.406161	0.416874	0.35201	0.454758	0.616544	0.572378	0.45781	0.400184	0.45867	0.407228	0.499475	0.41023	0.755019	0.592388
	16.4296	0.494493	0.422695	0.460032	0.373348	0.481409	0.368548	0.430283	0.388759	0.437533	0.48763	0.563932	0.480779	0.479625	0.465457	0.515667	0.461705	0.466714	0.384996	0.398319	0.477266	0.42443	0.578747	0.354417	0.446948	0.486725	0.436148	0.385715	0.363158	0.492284	0.63107	0.484055	0.360993	0.493194	0.415023	0.403273	0.41971	0.345498	0.430153	0.607791	0.541143	0.439087	0.40264	0.442545	0.413352	0.488714	0.413353	0.726053	0.594453
	16.4629	0.498764	0.427552	0.447226	0.371694	0.49091	0.363838	0.444332	0.391528	0.438223	0.485638	0.554592	0.487706	0.492824	0.480568	0.515529	0.47633	0.470658	0.382886	0.405483	0.486828	0.411923	0.582942	0.344384	0.445443	0.501795	0.45281	0.387003	0.351216	0.485455	0.601008	0.481189	0.383724	0.493533	0.422606	0.396328	0.393415	0.350292	0.429789	0.604549	0.545168	0.443856	0.403511	0.448341	0.415972	0.49908	0.41581	0.731594	0.581658
	16.4963	0.500642	0.427895	0.45257	0.355447	0.477778	0.358978	0.445571	0.398029	0.432001	0.487064	0.556329	0.488473	0.480056	0.467815	0.522244	0.46368	0.476656	0.372012	0.403516	0.487237	0.414474	0.585375	0.334569	0.423399	0.499485	0.454702	0.386798	0.354257	0.494926	0.614855	0.486718	0.373177	0.493456	0.424121	0.395196	0.422326	0.337885	0.433561	0.599852	0.526659	0.441606	0.405138	0.44335	0.40253	0.492016	0.40532	0.731876	0.596937
	16.5296	0.507483	0.421721	0.452	0.367686	0.47122	0.36295	0.435258	0.379242	0.440551	0.472228	0.544511	0.490008	0.456945	0.45751	0.521804	0.465733	0.474363	0.373043	0.408109	0.495181	0.402601	0.581914	0.335714	0.419855	0.469651	0.449427	0.376093	0.349316	0.491778	0.645779	0.49068	0.366678	0.479023	0.428246	0.385551	0.408793	0.354537	0.429965	0.610404	0.517832	0.430274	0.402985	0.454532	0.399796	0.487333	0.408226	0.73421	0.606841
	16.563	0.501469	0.423181	0.45322	0.378326	0.471944	0.359848	0.439153	0.381869	0.436273	0.497379	0.562348	0.479639	0.472568	0.449389	0.533073	0.470153	0.467116	0.376309	0.395072	0.472328	0.421306	0.590213	0.353374	0.440662	0.488149	0.455277	0.384782	0.355028	0.473428	0.623303	0.490526	0.355292	0.478202	0.425342	0.39341	0.402775	0.355867	0.427824	0.618547	0.547275	0.439549	0.407664	0.453678	0.407484	0.494483	0.407702	0.702482	0.594267
	16.5963	0.513619	0.429953	0.451829	0.362912	0.481419	0.351975	0.423458	0.379912	0.433252	0.493827	0.5366	0.486138	0.47491	0.468272	0.546772	0.469284	0.450175	0.377284	0.405324	0.476859	0.414637	0.588066	0.35098	0.440031	0.479676	0.439036	0.373406	0.354383	0.463724	0.61995	0.462996	0.355424	0.476799	0.409138	0.405263	0.403148	0.342569	0.445931	0.595515	0.541242	0.462941	0.423781	0.451813	0.412815	0.481367	0.409128	0.713467	0.604438
	16.6296	0.51534	0.424061	0.465503	0.365673	0.486603	0.371467	0.445365	0.385394	0.438174	0.480266	0.551455	0.481148	0.478289	0.446355	0.526674	0.464896	0.466903	0.377899	0.408972	0.474327	0.422747	0.604047	0.358916	0.432906	0.514882	0.450837	0.391009	0.349519	0.461964	0.637158	0.497927	0.384262	0.488474	0.425503	0.40607	0.431019	0.350344	0.445438	0.609085	0.540306	0.430785	0.426779	0.463025	0.402363	0.498611	0.40455	0.739297	0.608165
	16.663	0.508491	0.432037	0.459766	0.364227	0.476766	0.354864	0.427049	0.376095	0.426596	0.489082	0.541576	0.483108	0.473817	0.450683	0.527199	0.475238	0.465186	0.388319	0.391925	0.505658	0.420839	0.598287	0.34769	0.43078	0.486873	0.440871	0.36866	0.350784	0.466217	0.604266	0.46286	0.369601	0.488822	0.40784	0.38392	0.400561	0.3681	0.438409	0.590009	0.539507	0.453229	0.434178	0.455934	0.393688	0.485506	0.392889	0.718159	0.60597
	16.6963	0.505311	0.436053	0.458911	0.360146	0.467577	0.363979	0.428613	0.371995	0.431493	0.48996	0.531737	0.490299	0.477622	0.467045	0.534324	0.479265	0.467095	0.374452	0.399434	0.479476	0.423115	0.597172	0.363713	0.422306	0.480626	0.452688	0.366771	0.349504	0.468766	0.658514	0.470554	0.368507	0.473919	0.412338	0.389989	0.390522	0.36038	0.427859	0.605083	0.532065	0.454846	0.435367	0.474792	0.4125	0.474435	0.409697	0.729442	0.593663
	16.7296	0.520502	0.428993	0.473131	0.36275	0.478234	0.34642	0.439225	0.378557	0.436442	0.476836	0.550407	0.481352	0.487568	0.475311	0.541952	0.469705	0.471773	0.38179	0.386411	0.501236	0.409806	0.63412	0.345113	0.448665	0.487957	0.447192	0.384341	0.355121	0.466764	0.65107	0.47657	0.36272	0.483752	0.411072	0.380947	0.418319	0.336631	0.399073	0.600324	0.535866	0.452497	0.458447	0.459353	0.395698	0.503337	0.409249	0.774804	0.591446
	16.763	0.509883	0.436069	0.466472	0.370579	0.494253	0.375028	0.436405	0.375897	0.438583	0.506078	0.554676	0.485986	0.47312	0.46173	0.54077	0.48105	0.465564	0.4016	0.406739	0.473319	0.424937	0.603959	0.34156	0.440179	0.498302	0.447799	0.376384	0.351645	0.467732	0.682409	0.488274	0.373332	0.487247	0.406713	0.390076	0.4358	0.360107	0.433796	0.602526	0.558788	0.444246	0.455411	0.458468	0.40908	0.498331	0.416945	0.745974	0.603634
	16.7963	0.495883	0.423661	0.459335	0.363332	0.487209	0.354852	0.438653	0.38017	0.437261	0.497627	0.55518	0.4855	0.461508	0.469479	0.527583	0.471638	0.450757	0.382663	0.40371	0.473319	0.420018	0.598805	0.335596	0.433989	0.450203	0.439109	0.370114	0.347439	0.452008	0.649312	0.479475	0.362624	0.475319	0.412932	0.38132	0.413212	0.351007	0.41103	0.589391	0.522766	0.430892	0.438427	0.4381	0.38924	0.478825	0.40012	0.732587	0.601204
	16.8296	0.518328	0.431272	0.485796	0.375005	0.469984	0.358757	0.43846	0.379477	0.44211	0.477414	0.550477	0.478501	0.468936	0.44891	0.532942	0.478123	0.469003	0.393447	0.390187	0.473337	0.413661	0.615062	0.349935	0.418621	0.481063	0.448689	0.374586	0.35021	0.452353	0.671987	0.487547	0.385266	0.484958	0.405425	0.391114	0.411166	0.348316	0.418057	0.571092	0.528855	0.448673	0.457916	0.459401	0.390253	0.48535	0.416923	0.695309	0.604608
	16.863	0.512017	0.433279	0.463479	0.378006	0.473275	0.368287	0.438034	0.393711	0.432883	0.483527	0.556582	0.489161	0.472416	0.460767	0.523686	0.475341	0.464195	0.379941	0.396274	0.489408	0.429302	0.615401	0.35863	0.435545	0.475321	0.440399	0.366821	0.346029	0.450523	0.64233	0.479463	0.361274	0.484599	0.404048	0.393879	0.42357	0.350319	0.423869	0.591195	0.510977	0.473092	0.468033	0.460212	0.401205	0.46257	0.43245	0.698454	0.612359
	16.8963	0.497587	0.421039	0.476766	0.378774	0.488333	0.360124	0.426863	0.38216	0.424527	0.484368	0.557524	0.476304	0.468818	0.466418	0.523047	0.479785	0.454729	0.369321	0.378591	0.479177	0.430922	0.597288	0.350254	0.427033	0.489615	0.455958	0.372753	0.345066	0.458642	0.693616	0.483963	0.365846	0.484215	0.423752	0.380513	0.416975	0.359257	0.399038	0.579399	0.525563	0.458419	0.443619	0.45435	0.39765	0.491264	0.419728	0.70417	0.612863
	16.9296	0.509781	0.427271	0.464061	0.372115	0.475223	0.36187	0.420596	0.379879	0.404122	0.481304	0.56159	0.493219	0.465553	0.468993	0.515529	0.483017	0.455334	0.376278	0.38665	0.470128	0.426011	0.630136	0.347793	0.459823	0.470194	0.438729	0.369072	0.348365	0.447709	0.678892	0.477446	0.366149	0.480977	0.406247	0.375206	0.415412	0.356077	0.413918	0.582031	0.50858	0.46176	0.449966	0.455679	0.401627	0.482727	0.408004	0.7211	0.601004
	16.963	0.508756	0.433613	0.477656	0.369895	0.483311	0.357631	0.43548	0.377692	0.427063	0.48852	0.567095	0.488729	0.478399	0.459254	0.508069	0.475628	0.464975	0.380605	0.408653	0.470182	0.419997	0.593699	0.345232	0.448363	0.488014	0.457517	0.379365	0.347285	0.440745	0.681303	0.48367	0.369911	0.478455	0.422498	0.367567	0.429561	0.35114	0.422332	0.579604	0.514807	0.460787	0.449553	0.476017	0.408115	0.487346	0.411817	0.735361	0.600464
	16.9963	0.505236	0.425375	0.469111	0.36502	0.488286	0.344549	0.437509	0.37958	0.428483	0.486649	0.551623	0.483175	0.459655	0.46334	0.519392	0.474562	0.465342	0.383926	0.390331	0.471866	0.427498	0.596215	0.347259	0.433366	0.492151	0.438059	0.380098	0.343975	0.454996	0.658945	0.482526	0.342949	0.47604	0.424095	0.377203	0.41815	0.361886	0.421141	0.54622	0.516105	0.468765	0.427412	0.450986	0.404868	0.484889	0.418297	0.676914	0.615313
	17.0296	0.507333	0.428987	0.483884	0.372433	0.475769	0.346159	0.427831	0.374111	0.427632	0.480855	0.55706	0.485843	0.464705	0.457724	0.508509	0.470833	0.449724	0.388584	0.418229	0.47493	0.442715	0.603613	0.336615	0.423059	0.483122	0.451686	0.364635	0.345459	0.45769	0.662213	0.476925	0.347753	0.47856	0.411324	0.379815	0.41974	0.342569	0.410931	0.591226	0.50655	0.457691	0.448795	0.465684	0.395019	0.487331	0.422658	0.743912	0.606802
	17.063	0.512865	0.428577	0.499051	0.377793	0.486589	0.349818	0.440824	0.377974	0.426294	0.494137	0.569213	0.491156	0.474799	0.457996	0.520781	0.488203	0.453277	0.381524	0.39764	0.495351	0.432473	0.600236	0.342902	0.421531	0.467795	0.455931	0.363335	0.347423	0.436009	0.694679	0.478727	0.351977	0.483517	0.434549	0.387062	0.425667	0.349054	0.426047	0.561792	0.483275	0.443905	0.433999	0.462752	0.404451	0.491571	0.411315	0.707149	0.603928
	17.0963	0.520464	0.419335	0.500871	0.376117	0.480366	0.363833	0.432885	0.366668	0.432268	0.486142	0.545503	0.48622	0.463724	0.453476	0.503485	0.466765	0.45892	0.373077	0.382926	0.476733	0.437056	0.594866	0.332389	0.426499	0.443541	0.457376	0.368338	0.347462	0.432022	0.664163	0.47513	0.338443	0.470645	0.420631	0.385427	0.409639	0.33769	0.414104	0.541124	0.507846	0.455819	0.429534	0.458894	0.39621	0.476252	0.41732	0.714723	0.590753
	17.1296	0.518226	0.424364	0.49735	0.378654	0.474484	0.351196	0.423859	0.368653	0.425796	0.46557	0.588204	0.466047	0.474383	0.474303	0.523822	0.477537	0.45841	0.386498	0.393664	0.498252	0.438472	0.586937	0.342825	0.433476	0.4686	0.445284	0.361587	0.338089	0.43925	0.687665	0.483789	0.359189	0.466361	0.426667	0.373437	0.421819	0.357083	0.407198	0.543496	0.523103	0.454349	0.40849	0.462343	0.404005	0.475793	0.424657	0.729008	0.598858
	17.1629	0.509684	0.427109	0.478189	0.391341	0.469495	0.35118	0.425285	0.362199	0.420616	0.466688	0.573246	0.474031	0.469391	0.462353	0.496732	0.476289	0.464631	0.380395	0.39186	0.499034	0.440727	0.597408	0.354562	0.421532	0.475015	0.440678	0.364021	0.345728	0.444717	0.68933	0.479259	0.373719	0.483735	0.415465	0.395765	0.419436	0.355089	0.416792	0.561874	0.528892	0.43676	0.400105	0.472422	0.412287	0.460965	0.422276	0.717469	0.606839
	17.1963	0.503897	0.420407	0.464295	0.386558	0.468668	0.362116	0.441655	0.374368	0.431844	0.472473	0.57287	0.463532	0.46897	0.461302	0.491771	0.471806	0.460688	0.388529	0.379269	0.480381	0.452785	0.593072	0.334445	0.427447	0.479413	0.460463	0.358342	0.339498	0.43163	0.679632	0.46846	0.362246	0.471824	0.421409	0.381112	0.410689	0.338289	0.405471	0.568205	0.514324	0.426018	0.395935	0.458724	0.400411	0.464624	0.425778	0.734647	0.604489
	17.2296	0.511989	0.422945	0.460519	0.371918	0.485389	0.365092	0.426818	0.37506	0.424581	0.473335	0.570608	0.47538	0.452095	0.463413	0.492069	0.472423	0.462689	0.380141	0.395615	0.487834	0.437523	0.599399	0.338702	0.408332	0.460993	0.43385	0.361681	0.338214	0.423928	0.653015	0.466118	0.378248	0.474846	0.425783	0.392553	0.415511	0.348323	0.403433	0.549401	0.497533	0.425916	0.389683	0.453495	0.399452	0.452426	0.417274	0.703738	0.607407
	17.263	0.510728	0.429732	0.460281	0.37317	0.457304	0.349911	0.434234	0.372945	0.425103	0.499878	0.566645	0.461941	0.44428	0.446914	0.497709	0.467948	0.452777	0.383406	0.404194	0.502388	0.471531	0.605836	0.344234	0.416958	0.474851	0.438214	0.36235	0.336991	0.429728	0.709721	0.47226	0.374311	0.465955	0.419465	0.400297	0.411318	0.365491	0.403743	0.548928	0.541054	0.459853	0.392643	0.452689	0.413228	0.486903	0.406102	0.721748	0.605653
	17.2963	0.500776	0.426795	0.466982	0.372492	0.474096	0.348453	0.435089	0.381709	0.413166	0.473498	0.584364	0.469318	0.481839	0.443559	0.502787	0.475014	0.446845	0.380251	0.396727	0.479096	0.44152	0.606497	0.337575	0.406661	0.448322	0.44459	0.359617	0.342775	0.437328	0.687563	0.477913	0.351662	0.465793	0.412051	0.389779	0.404226	0.348361	0.397109	0.56742	0.513759	0.463168	0.385598	0.466409	0.40614	0.494517	0.424961	0.679957	0.609915
	17.3296	0.501189	0.423327	0.439291	0.382928	0.487529	0.363371	0.428681	0.382453	0.424085	0.482151	0.546384	0.460346	0.460813	0.462871	0.49382	0.464663	0.452812	0.377997	0.396013	0.479161	0.421132	0.574586	0.338328	0.430723	0.476435	0.451752	0.350356	0.339932	0.419344	0.707256	0.467828	0.354417	0.479631	0.423233	0.381257	0.427224	0.34449	0.413331	0.55601	0.498901	0.427364	0.388416	0.464007	0.412288	0.474855	0.417521	0.703213	0.608327
	17.3629	0.504235	0.429324	0.433167	0.365188	0.487051	0.351226	0.425381	0.364472	0.417381	0.483718	0.584484	0.463634	0.461942	0.453629	0.479556	0.461238	0.448635	0.384435	0.405415	0.458449	0.429469	0.581261	0.34623	0.42589	0.462025	0.454391	0.357827	0.346539	0.42496	0.646311	0.467107	0.352722	0.472015	0.41503	0.382167	0.401038	0.35191	0.39824	0.526817	0.52352	0.450641	0.381887	0.455578	0.394821	0.469483	0.399121	0.710508	0.602883
	17.3963	0.494296	0.42784	0.440927	0.381349	0.46555	0.356951	0.425967	0.374039	0.42048	0.463335	0.560325	0.455975	0.477141	0.449628	0.482123	0.475444	0.452941	0.39374	0.403554	0.476597	0.43617	0.607518	0.357032	0.397625	0.451247	0.455422	0.352288	0.337071	0.423315	0.698561	0.476908	0.366835	0.477849	0.417612	0.383329	0.404348	0.337183	0.387995	0.540934	0.491591	0.485917	0.381517	0.452055	0.415019	0.467165	0.412089	0.704432	0.599365
	17.4296	0.505236	0.426383	0.44219	0.377005	0.508284	0.354099	0.42709	0.36743	0.431821	0.466212	0.580598	0.44782	0.450241	0.450259	0.490144	0.46137	0.451192	0.372352	0.407737	0.457561	0.419823	0.619846	0.333046	0.416232	0.464252	0.427062	0.357967	0.337187	0.420594	0.669659	0.470525	0.373476	0.466628	0.406551	0.384256	0.431849	0.352791	0.40898	0.558052	0.506379	0.453226	0.382657	0.45097	0.397435	0.456327	0.418306	0.693322	0.59095
	17.4629	0.51704	0.428406	0.435009	0.370195	0.47856	0.359191	0.415197	0.396855	0.42705	0.469881	0.558601	0.458434	0.463246	0.45061	0.475785	0.460995	0.453245	0.373189	0.393012	0.497571	0.428411	0.611266	0.327108	0.438616	0.445957	0.429343	0.363078	0.335917	0.423156	0.662847	0.468841	0.367558	0.482472	0.4192	0.379268	0.428215	0.348264	0.392819	0.549318	0.505621	0.434346	0.368803	0.462573	0.404977	0.465703	0.425448	0.7342	0.589312
	17.4963	0.499542	0.420997	0.425599	0.365865	0.470228	0.350034	0.420882	0.373091	0.427397	0.469204	0.564512	0.461226	0.469861	0.459921	0.475211	0.456627	0.447348	0.371952	0.382508	0.468004	0.432534	0.609448	0.351261	0.422305	0.465894	0.436399	0.360229	0.331797	0.42456	0.655218	0.478401	0.35372	0.468332	0.414066	0.387723	0.415314	0.346083	0.41895	0.542743	0.494917	0.446602	0.368559	0.451582	0.40073	0.456493	0.406903	0.7127	0.582472
	17.5296	0.504499	0.423368	0.426467	0.368971	0.501604	0.35217	0.422351	0.377187	0.410023	0.475274	0.569433	0.446877	0.460921	0.452308	0.475819	0.470313	0.445895	0.383304	0.386216	0.450981	0.444205	0.607889	0.354551	0.41059	0.473957	0.42531	0.359606	0.338862	0.426838	0.698471	0.475282	0.35164	0.480851	0.412393	0.39536	0.423051	0.341264	0.412397	0.523262	0.496103	0.443273	0.377368	0.46186	0.401385	0.482713	0.408184	0.70069	0.569923
	17.563	0.503483	0.42855	0.420812	0.368259	0.478752	0.364423	0.421296	0.375621	0.428534	0.481116	0.572009	0.453436	0.465572	0.477963	0.478808	0.463294	0.446395	0.381109	0.393095	0.477289	0.431001	0.607474	0.328681	0.433254	0.460995	0.42868	0.354124	0.331807	0.439177	0.685303	0.473874	0.366762	0.474991	0.419979	0.373603	0.406715	0.362076	0.389153	0.539944	0.510698	0.453857	0.36941	0.458058	0.406839	0.475922	0.411778	0.762889	0.577575
	17.5963	0.505222	0.428773	0.419775	0.367836	0.472303	0.349547	0.416487	0.377717	0.423806	0.469036	0.561192	0.444978	0.456047	0.45582	0.476439	0.461584	0.448887	0.381876	0.399855	0.486357	0.430357	0.589552	0.339798	0.434435	0.466904	0.41767	0.352297	0.334507	0.421499	0.645169	0.479662	0.370876	0.476284	0.415817	0.382304	0.420561	0.343915	0.39667	0.521205	0.529997	0.451528	0.379086	0.458746	0.396801	0.472395	0.421145	0.74929	0.575431
	17.6296	0.496253	0.420363	0.410907	0.37298	0.48685	0.348116	0.419405	0.380062	0.409326	0.473699	0.574152	0.452854	0.461575	0.449599	0.467916	0.453105	0.449528	0.368024	0.365758	0.473302	0.442639	0.59639	0.347331	0.409941	0.448928	0.43764	0.353434	0.329757	0.421217	0.69392	0.472353	0.375586	0.472365	0.418077	0.374114	0.407817	0.363818	0.380319	0.520743	0.475662	0.446778	0.364541	0.465465	0.40843	0.467376	0.421302	0.719827	0.558731
	17.663	0.490366	0.416141	0.403416	0.370654	0.481603	0.355724	0.416448	0.369565	0.418096	0.455155	0.570995	0.44547	0.455012	0.457258	0.472879	0.459086	0.449406	0.378802	0.391752	0.460513	0.431741	0.614064	0.341499	0.41297	0.438412	0.415436	0.363721	0.338707	0.422454	0.653968	0.476657	0.366129	0.48089	0.410716	0.390951	0.417788	0.364134	0.413304	0.542233	0.478685	0.442968	0.384277	0.452141	0.391044	0.477032	0.429999	0.739329	0.566113
	17.6963	0.488747	0.429025	0.40694	0.365093	0.493861	0.353197	0.400233	0.365568	0.419417	0.478562	0.576261	0.465767	0.449896	0.453535	0.476765	0.464475	0.452218	0.377253	0.384312	0.46522	0.428107	0.596097	0.347535	0.433225	0.484973	0.432153	0.346515	0.331096	0.437619	0.668059	0.474722	0.367589	0.471519	0.408773	0.386019	0.411422	0.356822	0.39882	0.528598	0.503156	0.438279	0.369421	0.444345	0.401969	0.476689	0.427268	0.732313	0.56107
	17.7296	0.504956	0.434808	0.400977	0.375752	0.483156	0.349665	0.412199	0.377188	0.421668	0.484125	0.577507	0.458209	0.441945	0.473802	0.467393	0.464665	0.451696	0.384967	0.362716	0.491971	0.442921	0.616395	0.338611	0.425088	0.472694	0.427432	0.363913	0.339291	0.434249	0.649289	0.47098	0.373656	0.488665	0.410231	0.428683	0.419641	0.35073	0.388857	0.528027	0.508889	0.459955	0.372019	0.460798	0.403661	0.482466	0.424767	0.730723	0.564668
	17.7629	0.488837	0.422843	0.407455	0.369515	0.490756	0.339971	0.412658	0.36417	0.409249	0.489057	0.586229	0.456442	0.45891	0.461508	0.470141	0.459039	0.452125	0.376061	0.39497	0.453401	0.443384	0.608048	0.350365	0.424531	0.465337	0.425923	0.351577	0.334882	0.412734	0.650496	0.468783	0.363527	0.478507	0.425714	0.410979	0.399022	0.335733	0.395933	0.536748	0.491613	0.452285	0.375223	0.447138	0.395678	0.460053	0.432961	0.744242	0.564018
	17.7963	0.482068	0.416615	0.395867	0.354991	0.490819	0.363281	0.425594	0.374835	0.412044	0.464585	0.541582	0.447129	0.458405	0.453987	0.459631	0.46107	0.445513	0.380621	0.374459	0.499805	0.417138	0.593645	0.333654	0.431003	0.447153	0.435664	0.343536	0.327583	0.444447	0.62255	0.48727	0.356007	0.48279	0.397729	0.397264	0.409147	0.316079	0.372174	0.522683	0.505981	0.429529	0.367058	0.454041	0.394665	0.477801	0.430835	0.728172	0.546216
	17.8296	0.480833	0.423307	0.413969	0.380088	0.478742	0.360086	0.407615	0.39623	0.411224	0.476452	0.575371	0.440187	0.462321	0.453704	0.467413	0.461074	0.455693	0.372468	0.371531	0.475844	0.420809	0.618433	0.322325	0.431825	0.451188	0.423325	0.34789	0.332918	0.421853	0.657372	0.470137	0.363539	0.468996	0.398647	0.406173	0.422393	0.320997	0.390633	0.533855	0.478122	0.426514	0.385462	0.462184	0.383195	0.458659	0.416147	0.753687	0.550141
	17.863	0.476125	0.410172	0.379321	0.346751	0.481723	0.343827	0.413163	0.362648	0.403296	0.452815	0.54437	0.434475	0.436824	0.446964	0.442309	0.470421	0.440309	0.385819	0.379757	0.463021	0.404742	0.558913	0.32695	0.41088	0.453218	0.412469	0.335519	0.342983	0.42123	0.594454	0.478304	0.356781	0.455113	0.393447	0.391314	0.404894	0.313616	0.395551	0.518712	0.491401	0.439212	0.36494	0.443968	0.401243	0.448399	0.419805	0.759849	0.537295
	17.8963	0.477042	0.421839	0.40202	0.363508	0.471428	0.350834	0.424571	0.362047	0.412607	0.451427	0.562024	0.44151	0.437018	0.467291	0.45295	0.50153	0.444926	0.378107	0.383097	0.487573	0.410389	0.608221	0.342608	0.437338	0.423674	0.433759	0.334918	0.356676	0.435461	0.677424	0.487869	0.354325	0.467279	0.406134	0.395924	0.404795	0.344169	0.380166	0.528186	0.511584	0.43178	0.376138	0.436526	0.396021	0.461707	0.436393	0.714428	0.541456
	17.9296	0.471312	0.413762	0.399957	0.363505	0.464342	0.354999	0.424345	0.365104	0.410494	0.456822	0.545388	0.441237	0.435137	0.448278	0.44791	0.505703	0.444846	0.368866	0.355831	0.455794	0.407726	0.548346	0.329784	0.432302	0.456046	0.410456	0.345102	0.363698	0.427249	0.628137	0.480727	0.356208	0.457206	0.387129	0.389535	0.402608	0.328834	0.391188	0.526175	0.505462	0.438504	0.361231	0.453548	0.402999	0.475583	0.431908	0.706966	0.50771
	17.963	0.453456	0.409325	0.398397	0.369015	0.472007	0.342159	0.420357	0.363602	0.395641	0.454202	0.546274	0.443364	0.452943	0.468796	0.441358	0.518873	0.449968	0.376011	0.387918	0.467398	0.417041	0.598016	0.326088	0.421336	0.443107	0.422871	0.346606	0.369022	0.416887	0.662531	0.491035	0.34805	0.45545	0.385653	0.373406	0.417255	0.332562	0.375081	0.499337	0.484862	0.433294	0.383025	0.446374	0.4045	0.447238	0.427059	0.730707	0.508668
	17.9963	0.454243	0.406241	0.401833	0.363244	0.475425	0.334383	0.406262	0.360785	0.415482	0.454392	0.532892	0.438749	0.444472	0.453618	0.425307	0.54765	0.449024	0.376306	0.369149	0.448551	0.416995	0.597942	0.33087	0.427457	0.432103	0.4127	0.336385	0.368649	0.402689	0.603443	0.462041	0.358081	0.450465	0.39529	0.381118	0.391628	0.349506	0.368835	0.507378	0.492932	0.429471	0.365612	0.443715	0.406035	0.451194	0.418316	0.725234	0.506574
	18.0296	0.452596	0.405084	0.395282	0.356562	0.472367	0.348397	0.404367	0.353389	0.392884	0.440289	0.528865	0.426223	0.444175	0.450708	0.434079	0.523216	0.435213	0.372064	0.358884	0.47118	0.397173	0.584594	0.343854	0.419539	0.454291	0.405494	0.340147	0.36657	0.400244	0.608732	0.445504	0.362654	0.44512	0.392141	0.371662	0.399146	0.314491	0.394976	0.507475	0.475608	0.429656	0.360501	0.455236	0.396497	0.466546	0.400891	0.734299	0.497281
	18.0629	0.463991	0.407443	0.374587	0.352553	0.441443	0.330774	0.406206	0.346937	0.388934	0.443691	0.519693	0.417912	0.438964	0.453319	0.434057	0.517943	0.436491	0.360604	0.368687	0.479643	0.401883	0.537131	0.33028	0.398834	0.445947	0.404189	0.338357	0.356391	0.399785	0.594889	0.452246	0.341103	0.443765	0.381606	0.375078	0.389248	0.322955	0.376821	0.473998	0.487994	0.431238	0.345002	0.442626	0.390906	0.423284	0.414349	0.733387	0.490805
	18.0963	0.459296	0.418362	0.387681	0.355725	0.458846	0.347657	0.404284	0.359113	0.39151	0.447248	0.531021	0.430116	0.433386	0.459706	0.428927	0.517199	0.443843	0.377931	0.354862	0.44573	0.415925	0.573741	0.333174	0.438978	0.445091	0.397673	0.327036	0.371369	0.405113	0.63951	0.450869	0.363987	0.440972	0.363143	0.370852	0.38464	0.308875	0.372014	0.479849	0.493956	0.418132	0.348919	0.439674	0.40283	0.433548	0.408359	0.7302	0.487812
	18.1296	0.456738	0.41699	0.372558	0.355491	0.468712	0.353406	0.404166	0.351796	0.385723	0.44139	0.527913	0.418193	0.438533	0.452865	0.422629	0.519814	0.440379	0.366597	0.34912	0.457584	0.41573	0.587579	0.311629	0.414059	0.449531	0.405509	0.33962	0.362155	0.413645	0.598289	0.456488	0.352143	0.440138	0.378919	0.373774	0.386971	0.325393	0.380348	0.475408	0.513847	0.42547	0.347893	0.432171	0.403641	0.434921	0.404334	0.742434	0.472468
	18.163	0.453899	0.420293	0.38518	0.358889	0.458645	0.341295	0.424217	0.359823	0.383622	0.438348	0.529819	0.426127	0.43675	0.444034	0.413396	0.508947	0.438067	0.376092	0.361501	0.446626	0.416911	0.56897	0.340182	0.386497	0.448728	0.408694	0.341929	0.355731	0.403734	0.607344	0.453621	0.361479	0.43803	0.393695	0.378704	0.383438	0.338007	0.375835	0.472958	0.490245	0.450274	0.357648	0.434434	0.3899	0.43584	0.400304	0.732092	0.48147
	18.1963	0.446118	0.41167	0.366355	0.358735	0.453277	0.342898	0.399218	0.347279	0.388397	0.441833	0.503899	0.419797	0.444792	0.451016	0.417674	0.521901	0.441966	0.384167	0.358949	0.455383	0.411741	0.549393	0.325652	0.412185	0.441419	0.398393	0.329733	0.362439	0.402428	0.594091	0.445274	0.360089	0.420531	0.382151	0.374226	0.392146	0.339026	0.36533	0.468843	0.465113	0.422049	0.345473	0.427503	0.381547	0.423126	0.395701	0.72678	0.477516
	18.2296	0.461356	0.417692	0.376004	0.354738	0.453656	0.342872	0.4019	0.359741	0.371032	0.431168	0.529461	0.41637	0.446563	0.443181	0.422441	0.50418	0.444334	0.371261	0.3594	0.468952	0.412236	0.564204	0.333222	0.404252	0.448002	0.411446	0.337248	0.355634	0.412809	0.642157	0.453859	0.355998	0.432177	0.375198	0.393716	0.420864	0.347043	0.376666	0.467151	0.493305	0.41759	0.356216	0.433996	0.398318	0.416077	0.387848	0.737383	0.479694
	18.263	0.456298	0.406018	0.37439	0.3454	0.448222	0.323197	0.402988	0.359401	0.380144	0.421492	0.528504	0.426491	0.433278	0.43443	0.40736	0.495859	0.433132	0.377801	0.368807	0.461315	0.407284	0.561655	0.331506	0.431102	0.425404	0.394323	0.335307	0.341685	0.398394	0.618471	0.442088	0.358324	0.430234	0.375218	0.371406	0.40555	0.320722	0.401388	0.453027	0.468418	0.424456	0.346543	0.417712	0.386698	0.41548	0.374579	0.803005	0.466511
	18.2963	0.462437	0.40606	0.372887	0.346695	0.448289	0.33676	0.419015	0.36841	0.389026	0.442767	0.522283	0.415794	0.447312	0.443879	0.416698	0.509682	0.434687	0.37728	0.333897	0.457215	0.401864	0.548795	0.329778	0.431846	0.428509	0.394559	0.331947	0.35528	0.401431	0.614878	0.440956	0.364484	0.426241	0.377963	0.375683	0.371741	0.327689	0.370969	0.444064	0.48415	0.400795	0.354008	0.411006	0.39435	0.42107	0.386784	0.763228	0.468909
	18.3296	0.452188	0.410044	0.36992	0.351986	0.448278	0.333188	0.393469	0.368605	0.378764	0.435873	0.511889	0.409103	0.436171	0.448947	0.417881	0.51278	0.435997	0.369477	0.354423	0.46321	0.40185	0.569358	0.326215	0.424297	0.435158	0.393184	0.329809	0.34297	0.402545	0.613586	0.436043	0.353679	0.427094	0.372685	0.370776	0.405635	0.30765	0.370998	0.449739	0.477216	0.411052	0.360217	0.406039	0.385631	0.415594	0.382973	0.743492	0.459887
	18.363	0.462659	0.416743	0.359961	0.353281	0.43344	0.339439	0.420575	0.367322	0.39098	0.434687	0.527446	0.417494	0.445143	0.432443	0.408816	0.494433	0.441609	0.377708	0.341246	0.450072	0.416341	0.560612	0.332143	0.421248	0.462374	0.402746	0.326581	0.339112	0.397996	0.640002	0.444485	0.371307	0.421428	0.365941	0.364522	0.411709	0.319894	0.388247	0.460141	0.493317	0.413108	0.355234	0.420172	0.387936	0.419514	0.372425	0.780198	0.458536
	18.3963	0.459955	0.418561	0.3595	0.347907	0.450797	0.337841	0.401254	0.379134	0.37202	0.438386	0.499523	0.410285	0.434348	0.427625	0.388685	0.474736	0.423956	0.365269	0.343944	0.451753	0.408102	0.565713	0.324557	0.417985	0.411809	0.392609	0.332082	0.332839	0.393752	0.590958	0.432662	0.350216	0.426155	0.373255	0.359997	0.401337	0.305888	0.380262	0.442898	0.463425	0.432869	0.352324	0.421131	0.374516	0.423349	0.375184	0.758519	0.455269
	18.4296	0.445327	0.412256	0.374187	0.34815	0.451915	0.340962	0.3958	0.37725	0.381789	0.431938	0.504053	0.407912	0.425293	0.423165	0.408324	0.49554	0.430527	0.365921	0.351331	0.452171	0.415596	0.547669	0.330568	0.403349	0.449747	0.374057	0.330437	0.334659	0.396459	0.628377	0.43705	0.373517	0.424663	0.37468	0.378469	0.375699	0.300757	0.35878	0.432387	0.51258	0.427477	0.347853	0.423064	0.382278	0.406006	0.366841	0.747268	0.454622
	18.463	0.462339	0.411232	0.358405	0.347621	0.442905	0.332512	0.420902	0.361223	0.380285	0.4183	0.516302	0.399365	0.415074	0.408145	0.400576	0.500889	0.425845	0.365594	0.352572	0.45501	0.401477	0.548453	0.318054	0.416843	0.431893	0.395074	0.327369	0.334292	0.392691	0.626985	0.428245	0.352889	0.420246	0.367481	0.37668	0.380134	0.318855	0.383574	0.439409	0.478738	0.410219	0.348707	0.414272	0.378467	0.415633	0.367454	0.751605	0.450911
	18.4963	0.464172	0.415449	0.361884	0.348152	0.447249	0.340807	0.416402	0.375744	0.380759	0.423686	0.523525	0.408448	0.420431	0.43224	0.403528	0.496103	0.428331	0.375963	0.343156	0.442894	0.413112	0.553339	0.312057	0.428321	0.449192	0.384103	0.324865	0.342286	0.394603	0.618483	0.427995	0.35732	0.422011	0.376586	0.373362	0.393877	0.320848	0.371716	0.431648	0.489696	0.422549	0.338467	0.413665	0.384002	0.409363	0.371077	0.783911	0.456623
	18.5296	0.442544	0.417007	0.352529	0.343373	0.446041	0.355225	0.407935	0.38354	0.375376	0.432345	0.501021	0.398021	0.436888	0.418232	0.416729	0.482832	0.435841	0.368304	0.368908	0.471055	0.406705	0.539379	0.331379	0.406073	0.445642	0.392537	0.326127	0.33787	0.385153	0.655995	0.429049	0.353918	0.425062	0.374519	0.356546	0.400527	0.309338	0.366012	0.428553	0.466903	0.43515	0.341864	0.405739	0.383962	0.400532	0.366679	0.744932	0.447849
	18.5629	0.453291	0.415081	0.357285	0.352936	0.454674	0.349363	0.402867	0.372009	0.373654	0.422684	0.50828	0.397373	0.421501	0.429015	0.401372	0.476093	0.427832	0.368459	0.366596	0.484313	0.413477	0.552801	0.332947	0.418788	0.437122	0.396737	0.338392	0.329839	0.391118	0.666197	0.443919	0.345777	0.424095	0.367986	0.369464	0.415211	0.33218	0.37031	0.436741	0.483039	0.42057	0.344583	0.416816	0.378611	0.404982	0.365382	0.764557	0.451809
	18.5963	0.457039	0.41994	0.361342	0.352287	0.434513	0.343164	0.41001	0.375805	0.378732	0.434062	0.503592	0.400378	0.435363	0.412692	0.390408	0.486574	0.431982	0.365732	0.343183	0.457469	0.412984	0.544772	0.335356	0.428103	0.413547	0.394685	0.329456	0.325848	0.389673	0.61507	0.432536	0.376009	0.415325	0.372902	0.37848	0.39044	0.325798	0.356534	0.42818	0.467488	0.428749	0.337766	0.401401	0.394452	0.418336	0.355656	0.756126	0.437557
	18.6296	0.444305	0.405409	0.359019	0.355236	0.433726	0.342783	0.399083	0.375046	0.377408	0.429461	0.504299	0.407698	0.433102	0.432301	0.399219	0.470376	0.441699	0.36638	0.349269	0.448185	0.405939	0.529325	0.332223	0.437569	0.444456	0.380056	0.329761	0.333222	0.401837	0.624001	0.438915	0.359813	0.413802	0.366243	0.367532	0.411286	0.324594	0.368058	0.435216	0.486253	0.40409	0.327931	0.394636	0.385707	0.394272	0.364695	0.744469	0.436694
	18.6629	0.438602	0.411189	0.351477	0.356281	0.446325	0.336183	0.411257	0.359927	0.367049	0.432322	0.489448	0.393627	0.420727	0.423617	0.40079	0.467156	0.427822	0.374191	0.345605	0.441604	0.385587	0.538412	0.327584	0.433704	0.430848	0.39243	0.32776	0.322693	0.378082	0.634481	0.422636	0.352137	0.402623	0.363004	0.360946	0.393802	0.312118	0.362123	0.426775	0.487582	0.416311	0.337415	0.398817	0.387551	0.395953	0.363289	0.746828	0.433808
	18.6963	0.450319	0.420204	0.354367	0.335599	0.440945	0.330016	0.412779	0.354232	0.361439	0.423118	0.490061	0.402153	0.421866	0.42994	0.406795	0.474596	0.418517	0.384498	0.349719	0.467667	0.395275	0.509478	0.320917	0.419544	0.42551	0.389924	0.31663	0.322432	0.39137	0.629931	0.430427	0.361168	0.412571	0.358302	0.365533	0.390413	0.309825	0.370859	0.427213	0.475056	0.415233	0.330635	0.396595	0.390637	0.394914	0.356867	0.759954	0.444339
	18.7296	0.441472	0.422099	0.355117	0.346518	0.435583	0.346443	0.412093	0.36548	0.36899	0.451928	0.498843	0.390109	0.415269	0.412178	0.40062	0.465476	0.42207	0.394015	0.348753	0.445158	0.405366	0.525415	0.339607	0.416671	0.44458	0.370454	0.315055	0.3184	0.380726	0.623744	0.422076	0.353793	0.412996	0.355946	0.366374	0.395599	0.293508	0.335241	0.413208	0.500412	0.423575	0.325972	0.396289	0.382237	0.391499	0.374782	0.73051	0.438036
	18.7629	0.446115	0.411549	0.346597	0.340569	0.437215	0.347412	0.404114	0.356095	0.367227	0.421435	0.494135	0.389034	0.433363	0.421303	0.394445	0.479226	0.416943	0.367205	0.336057	0.450261	0.407713	0.506955	0.311252	0.403715	0.420426	0.377172	0.327956	0.323509	0.390716	0.635372	0.41722	0.363388	0.406757	0.359981	0.375315	0.410253	0.311962	0.359326	0.410648	0.47883	0.424321	0.32405	0.406068	0.371135	0.39045	0.368186	0.714934	0.441939
	18.7963	0.449038	0.40915	0.356588	0.346696	0.430724	0.337988	0.414417	0.353076	0.363425	0.415531	0.496541	0.390853	0.420542	0.408271	0.385984	0.453885	0.419386	0.370429	0.341255	0.440706	0.394448	0.526166	0.326116	0.41863	0.409537	0.371069	0.323126	0.329444	0.390841	0.641093	0.412231	0.366355	0.408651	0.34716	0.359106	0.386313	0.324367	0.358875	0.403261	0.488606	0.397827	0.322902	0.403505	0.372884	0.369755	0.346147	0.744005	0.446884
	18.8296	0.447023	0.416617	0.343633	0.338941	0.439624	0.350756	0.405842	0.356734	0.37077	0.424937	0.482004	0.389627	0.411226	0.406269	0.410388	0.461932	0.42531	0.367008	0.340032	0.429966	0.386556	0.494399	0.32159	0.424775	0.421038	0.372285	0.307691	0.32443	0.387196	0.605485	0.4095	0.353233	0.408268	0.356334	0.371685	0.402123	0.302238	0.349696	0.410579	0.478342	0.413273	0.325138	0.396022	0.3886	0.388763	0.349747	0.718304	0.428823
	18.863	0.455585	0.415055	0.352369	0.342292	0.457482	0.33166	0.407029	0.351434	0.373943	0.411899	0.510889	0.39523	0.418961	0.407417	0.39593	0.461598	0.418751	0.371701	0.351243	0.453302	0.388435	0.516142	0.32646	0.424922	0.441979	0.384201	0.312393	0.328406	0.395706	0.635768	0.422742	0.365113	0.418471	0.351851	0.372344	0.403816	0.311941	0.356915	0.408238	0.472835	0.442504	0.329973	0.394783	0.375157	0.399862	0.359724	0.693055	0.429512
	18.8963	0.444056	0.412354	0.341742	0.346832	0.445092	0.335748	0.413864	0.349723	0.369491	0.406172	0.538034	0.379018	0.407954	0.423264	0.393727	0.460522	0.421059	0.360699	0.350629	0.428659	0.381746	0.506431	0.322223	0.416994	0.433726	0.362013	0.317468	0.31301	0.394637	0.605779	0.424976	0.351495	0.407927	0.350154	0.356629	0.377895	0.308208	0.340215	0.413413	0.445258	0.400865	0.325892	0.394193	0.380318	0.385769	0.344108	0.745631	0.431069
	18.9296	0.453435	0.420748	0.356112	0.344222	0.442177	0.327604	0.414039	0.350217	0.366924	0.423208	0.537256	0.403583	0.415388	0.412315	0.401278	0.467184	0.416643	0.37248	0.354058	0.442697	0.370098	0.507547	0.322925	0.430163	0.454688	0.374965	0.320927	0.324206	0.384641	0.597731	0.427267	0.348473	0.4099	0.348868	0.372063	0.409341	0.312476	0.353305	0.412454	0.468266	0.419606	0.327991	0.390741	0.377585	0.400089	0.342916	0.709104	0.421675
	18.9629	0.457293	0.417143	0.364417	0.353333	0.448126	0.338041	0.404156	0.355061	0.372803	0.429091	0.56024	0.395597	0.430235	0.402588	0.400947	0.462019	0.419909	0.384522	0.371373	0.444345	0.390188	0.539149	0.334409	0.429531	0.436821	0.375484	0.326446	0.321843	0.374067	0.641935	0.423392	0.360466	0.412487	0.355207	0.370517	0.409675	0.308926	0.356979	0.404069	0.465961	0.409895	0.321719	0.390045	0.366649	0.376665	0.346989	0.721832	0.438083
	18.9963	0.450229	0.411876	0.364471	0.339087	0.451301	0.345726	0.396721	0.346363	0.373186	0.413113	0.544052	0.385333	0.402064	0.420308	0.387936	0.443952	0.403656	0.359311	0.338713	0.440855	0.388115	0.491791	0.328556	0.429425	0.402295	0.377306	0.318047	0.315148	0.384466	0.629384	0.408948	0.361399	0.412726	0.34226	0.362914	0.387982	0.3182	0.35403	0.398522	0.462003	0.406299	0.316297	0.378719	0.380163	0.380434	0.344358	0.701357	0.42586
	19.0296	0.454947	0.419178	0.347832	0.348942	0.439289	0.336935	0.41057	0.348484	0.364218	0.413233	0.550896	0.395939	0.422596	0.407122	0.406316	0.446632	0.406979	0.379436	0.350257	0.447688	0.382549	0.488206	0.316403	0.418773	0.438151	0.376978	0.313817	0.322397	0.374167	0.582572	0.411187	0.359587	0.406713	0.341792	0.374069	0.41673	0.312741	0.349987	0.396348	0.467497	0.42197	0.317479	0.3983	0.391169	0.386168	0.346846	0.675215	0.43218
	19.063	0.448462	0.405186	0.346043	0.347961	0.438759	0.352498	0.390136	0.341338	0.358594	0.42096	0.526383	0.377168	0.409514	0.398674	0.391747	0.434635	0.410287	0.364636	0.337168	0.457931	0.382288	0.487833	0.313921	0.431738	0.421499	0.372379	0.317462	0.305682	0.363034	0.672519	0.411834	0.342214	0.40103	0.354169	0.36434	0.386798	0.306135	0.351292	0.392899	0.465479	0.393001	0.312429	0.392029	0.366616	0.364718	0.348878	0.675797	0.414722
	19.0963	0.451823	0.40854	0.343421	0.349819	0.437047	0.340688	0.402768	0.343697	0.364893	0.408805	0.544837	0.384966	0.42893	0.4052	0.387886	0.436055	0.407166	0.371906	0.34151	0.42238	0.383028	0.50218	0.315726	0.412678	0.414807	0.368458	0.305096	0.320109	0.373567	0.58892	0.41354	0.355053	0.390273	0.345527	0.371138	0.411738	0.298679	0.342989	0.387549	0.456148	0.39943	0.304945	0.386418	0.372283	0.382589	0.336462	0.698618	0.422014
	19.1296	0.460392	0.422168	0.362054	0.351299	0.42191	0.339924	0.408637	0.335605	0.355161	0.407206	0.553475	0.382466	0.422879	0.40409	0.392043	0.447201	0.407611	0.382126	0.334944	0.44024	0.394853	0.512326	0.323432	0.407539	0.417961	0.390984	0.309675	0.322631	0.369707	0.649976	0.418518	0.353717	0.394418	0.356289	0.373797	0.408113	0.319494	0.339792	0.387091	0.485237	0.395986	0.308871	0.382403	0.368056	0.397712	0.348208	0.668952	0.413291
	19.1629	0.454388	0.410411	0.346872	0.34282	0.437563	0.33041	0.408563	0.335069	0.365753	0.394119	0.538551	0.388776	0.405968	0.408621	0.384235	0.432098	0.415591	0.366787	0.355899	0.474404	0.386074	0.508068	0.317953	0.413744	0.429562	0.375627	0.305626	0.313243	0.382477	0.622047	0.402104	0.355502	0.40246	0.350609	0.371148	0.39156	0.305573	0.358669	0.396445	0.481218	0.402134	0.315034	0.371464	0.370258	0.390896	0.350011	0.662797	0.416602
	19.1963	0.45606	0.418402	0.362351	0.344187	0.444274	0.334984	0.410133	0.346343	0.364366	0.411853	0.568838	0.396332	0.413256	0.415458	0.384196	0.443237	0.409969	0.369679	0.344486	0.435202	0.377097	0.508664	0.333096	0.434412	0.428926	0.377773	0.320606	0.322032	0.365698	0.612516	0.420529	0.37476	0.407364	0.349234	0.369817	0.404254	0.30746	0.346874	0.40778	0.483945	0.414062	0.317338	0.394236	0.375359	0.383746	0.340846	0.657639	0.415703
	19.2296	0.453836	0.407807	0.344024	0.346406	0.43604	0.332968	0.407853	0.340307	0.369988	0.399114	0.54798	0.378367	0.4097	0.414326	0.371799	0.442923	0.41107	0.368305	0.348943	0.447	0.376525	0.48791	0.305077	0.40514	0.438965	0.365734	0.319072	0.317403	0.372702	0.579766	0.407002	0.349537	0.397915	0.341748	0.353087	0.397802	0.323606	0.350418	0.395479	0.445572	0.391513	0.317905	0.389055	0.387025	0.374133	0.346004	0.626522	0.409316
	19.2629	0.45273	0.407884	0.342805	0.333813	0.429797	0.332428	0.414428	0.343186	0.356469	0.402299	0.561657	0.380231	0.425752	0.396816	0.403751	0.436259	0.40348	0.357536	0.358309	0.451535	0.384025	0.487235	0.318578	0.419154	0.442248	0.369711	0.301839	0.323227	0.378686	0.588666	0.420212	0.337758	0.389988	0.341088	0.368426	0.402588	0.298334	0.330414	0.397379	0.452159	0.413521	0.319061	0.391239	0.361364	0.378969	0.34339	0.652298	0.423739
	19.2963	0.467485	0.416317	0.346752	0.332264	0.434622	0.335632	0.405241	0.342927	0.371658	0.406444	0.538736	0.389715	0.421446	0.410206	0.387046	0.436582	0.397073	0.367607	0.35932	0.450893	0.391421	0.463819	0.320066	0.43744	0.426901	0.379467	0.315788	0.31776	0.370459	0.589292	0.408658	0.365245	0.401654	0.351418	0.363232	0.408859	0.333493	0.337792	0.379857	0.452188	0.415847	0.31734	0.377566	0.364337	0.3798	0.340008	0.618539	0.415511
	19.3296	0.451116	0.418834	0.350081	0.346674	0.423148	0.339163	0.409458	0.340914	0.367641	0.405218	0.515618	0.387678	0.42454	0.401133	0.388842	0.439407	0.408815	0.363699	0.351013	0.449339	0.364925	0.480067	0.324332	0.422159	0.411692	0.375269	0.297802	0.321981	0.367723	0.607891	0.417414	0.353943	0.402846	0.344203	0.362711	0.393699	0.32602	0.353725	0.388684	0.472526	0.403416	0.315829	0.374767	0.37207	0.368996	0.348534	0.66378	0.411499
	19.363	0.458611	0.410231	0.356948	0.347465	0.43291	0.337182	0.415688	0.339103	0.36506	0.420346	0.530143	0.38894	0.420572	0.405614	0.38959	0.43173	0.398732	0.362321	0.359259	0.460709	0.370439	0.466205	0.328367	0.40154	0.435518	0.386439	0.302724	0.314282	0.382296	0.595428	0.416347	0.350035	0.395294	0.347298	0.383612	0.388918	0.301723	0.351258	0.400402	0.480673	0.418854	0.317835	0.380455	0.369903	0.374768	0.334189	0.616472	0.418694
	19.3963	0.452268	0.415061	0.347794	0.333564	0.449112	0.336534	0.402205	0.334711	0.358114	0.403274	0.538571	0.384374	0.424592	0.406401	0.399147	0.437066	0.407097	0.373758	0.345403	0.444971	0.370067	0.485292	0.331921	0.420465	0.430582	0.363785	0.312999	0.334038	0.389244	0.57171	0.403672	0.373516	0.393722	0.352995	0.364375	0.384518	0.316852	0.371596	0.395976	0.472124	0.405606	0.307844	0.371952	0.371983	0.378321	0.340992	0.6228	0.406227
	19.4296	0.449104	0.417951	0.36453	0.328754	0.448053	0.327293	0.405993	0.332325	0.359433	0.414753	0.53302	0.377065	0.397067	0.412036	0.391645	0.43556	0.405464	0.377977	0.371213	0.465938	0.377697	0.473545	0.331358	0.412578	0.43139	0.367993	0.302698	0.322612	0.37172	0.610183	0.393468	0.354461	0.394844	0.343855	0.351971	0.391889	0.28673	0.353183	0.389964	0.46512	0.41134	0.310896	0.382627	0.371056	0.370654	0.344326	0.622428	0.411892
	19.463	0.451994	0.430625	0.350253	0.327558	0.434552	0.339939	0.4072	0.347895	0.366146	0.417948	0.53669	0.393805	0.406049	0.407606	0.396383	0.443809	0.418086	0.364665	0.357962	0.454885	0.371885	0.482375	0.324429	0.428785	0.436348	0.368827	0.312287	0.32024	0.372166	0.607764	0.397995	0.353651	0.397609	0.354379	0.352228	0.383057	0.307344	0.354329	0.400303	0.471267	0.41155	0.316477	0.383727	0.380665	0.378139	0.342822	0.610733	0.405791
	19.4963	0.465117	0.417132	0.353613	0.347522	0.43259	0.335171	0.414571	0.335254	0.359011	0.419433	0.523462	0.382859	0.414252	0.392116	0.396282	0.427086	0.404948	0.355349	0.363601	0.448745	0.384691	0.475025	0.315697	0.403691	0.415525	0.368111	0.316416	0.321325	0.381531	0.568155	0.410823	0.34177	0.394659	0.353698	0.376656	0.401117	0.308331	0.34841	0.390405	0.455803	0.40226	0.313364	0.383035	0.369379	0.374927	0.333208	0.574155	0.406605
	19.5296	0.452722	0.421316	0.366037	0.335111	0.426954	0.325602	0.412219	0.335096	0.373949	0.417875	0.516527	0.381055	0.419367	0.386056	0.36871	0.437812	0.412427	0.375923	0.346919	0.440554	0.382043	0.484505	0.331317	0.412591	0.420633	0.363646	0.312558	0.327509	0.37852	0.586612	0.406509	0.359646	0.39297	0.3493	0.374187	0.39233	0.307013	0.354847	0.391099	0.471417	0.4019	0.30893	0.382148	0.363354	0.384309	0.345214	0.613641	0.400742
	19.563	0.456852	0.415146	0.354122	0.343438	0.428812	0.33506	0.402405	0.340149	0.358066	0.405609	0.50906	0.388269	0.407096	0.395981	0.381064	0.433105	0.397043	0.368019	0.35761	0.448132	0.368517	0.449915	0.33716	0.411052	0.410193	0.361691	0.305212	0.326738	0.363856	0.617127	0.40497	0.355328	0.394719	0.348597	0.352617	0.371699	0.3014	0.344995	0.38713	0.452728	0.401974	0.300935	0.377764	0.380711	0.365549	0.330414	0.592123	0.401216
	19.5963	0.461274	0.420236	0.351567	0.340248	0.437475	0.341405	0.392055	0.342115	0.353785	0.406678	0.510122	0.389439	0.406248	0.396627	0.356639	0.43925	0.409494	0.385539	0.387998	0.483156	0.368672	0.462396	0.319351	0.41589	0.416582	0.368028	0.313769	0.31968	0.372484	0.560926	0.387333	0.353527	0.386016	0.354232	0.349586	0.397308	0.316283	0.366702	0.383193	0.46461	0.400878	0.317001	0.376205	0.362029	0.36743	0.327871	0.58322	0.393312
	19.6296	0.449664	0.416184	0.348718	0.339993	0.419561	0.343829	0.404931	0.334767	0.364609	0.408805	0.509754	0.389601	0.422751	0.412263	0.374064	0.421613	0.409911	0.356634	0.392001	0.461013	0.374959	0.461427	0.307099	0.417206	0.438847	0.366984	0.315528	0.328611	0.370612	0.599916	0.402725	0.368211	0.389867	0.344429	0.357193	0.39979	0.289907	0.353294	0.392145	0.457482	0.410561	0.312921	0.386355	0.369503	0.376859	0.336445	0.56499	0.411259
	19.663	0.456264	0.416145	0.362381	0.337656	0.429619	0.335358	0.398294	0.336491	0.362377	0.41886	0.496591	0.383819	0.42014	0.399903	0.387137	0.44306	0.406336	0.369017	0.393168	0.435114	0.37817	0.438431	0.326499	0.43339	0.419467	0.369311	0.300667	0.313569	0.356497	0.557723	0.398636	0.354826	0.392889	0.35826	0.372139	0.360687	0.309099	0.361126	0.392814	0.461567	0.388371	0.307486	0.379592	0.37285	0.374778	0.33132	0.547922	0.409592
	19.6963	0.459584	0.419643	0.354591	0.347849	0.444479	0.334275	0.405206	0.328364	0.362649	0.416146	0.517556	0.379027	0.426154	0.419167	0.381753	0.416716	0.401195	0.354927	0.387996	0.447834	0.374088	0.435137	0.323636	0.435777	0.444806	0.372464	0.313796	0.320308	0.375294	0.557709	0.413056	0.349663	0.381097	0.368556	0.37214	0.397859	0.318711	0.35008	0.386302	0.463795	0.409371	0.314513	0.374285	0.383213	0.390295	0.332118	0.538136	0.402854
	19.7296	0.448795	0.416181	0.359417	0.332953	0.425192	0.328059	0.411869	0.341334	0.348418	0.416309	0.499817	0.384672	0.415384	0.390346	0.384661	0.429591	0.40404	0.365105	0.398607	0.459178	0.365963	0.429372	0.330924	0.429038	0.427025	0.370386	0.316632	0.315716	0.366096	0.588321	0.402605	0.364496	0.393149	0.345129	0.351352	0.397054	0.308037	0.344996	0.382062	0.444113	0.397364	0.309162	0.387409	0.374125	0.387904	0.331582	0.563226	0.399423
	19.763	0.458109	0.409906	0.362472	0.329348	0.426031	0.337399	0.395584	0.335203	0.364006	0.409755	0.489109	0.383944	0.422382	0.395665	0.393607	0.431854	0.405261	0.36265	0.415812	0.439632	0.381657	0.413594	0.325628	0.4151	0.410127	0.364515	0.328441	0.317305	0.372025	0.632568	0.394135	0.358202	0.386246	0.343751	0.353401	0.385985	0.31442	0.335829	0.392332	0.453267	0.409907	0.316155	0.387222	0.370555	0.37127	0.320895	0.505504	0.397647
	19.7963	0.449175	0.409996	0.362767	0.338621	0.432569	0.342882	0.400618	0.341823	0.355245	0.411075	0.49875	0.381825	0.416557	0.390526	0.390591	0.430387	0.402455	0.352404	0.401524	0.422037	0.379112	0.428132	0.328433	0.407873	0.40948	0.370306	0.303765	0.311951	0.384717	0.599443	0.394988	0.353279	0.383337	0.353672	0.354921	0.393917	0.303427	0.365192	0.392923	0.438368	0.387205	0.31071	0.385767	0.362352	0.367331	0.323773	0.531499	0.406606
	19.8296	0.463445	0.414115	0.362462	0.33462	0.441985	0.352162	0.399632	0.328825	0.364562	0.413882	0.516827	0.382695	0.397226	0.4164	0.383627	0.430827	0.411375	0.366098	0.386604	0.436532	0.383144	0.410589	0.324071	0.432837	0.436486	0.362344	0.304123	0.318997	0.368975	0.614021	0.405331	0.370187	0.391331	0.346844	0.355032	0.392884	0.327204	0.349817	0.3983	0.467528	0.401848	0.315034	0.392152	0.3645	0.392291	0.330474	0.533579	0.400131
	19.863	0.453078	0.41348	0.364922	0.326884	0.433579	0.337074	0.413258	0.340509	0.374716	0.41709	0.495373	0.374867	0.400539	0.383741	0.373038	0.428571	0.399897	0.35739	0.402956	0.453891	0.363202	0.389923	0.322822	0.415128	0.429341	0.373921	0.302133	0.324814	0.361648	0.548304	0.405663	0.354406	0.380001	0.340502	0.371031	0.401111	0.30652	0.359013	0.381176	0.459858	0.417446	0.317173	0.399969	0.37631	0.374956	0.324205	0.518423	0.400738
	19.8963	0.451305	0.412313	0.359122	0.339936	0.428153	0.334786	0.409082	0.344792	0.355807	0.410458	0.49526	0.381167	0.419496	0.401515	0.392704	0.426545	0.410506	0.34831	0.409738	0.442461	0.385601	0.392803	0.337242	0.430804	0.44662	0.359888	0.303941	0.322879	0.373458	0.593038	0.40394	0.364467	0.39202	0.357022	0.369085	0.394438	0.321994	0.355292	0.385994	0.441332	0.387555	0.323995	0.388057	0.360135	0.368449	0.324392	0.521538	0.401271
	19.9296	0.465187	0.417441	0.365257	0.340057	0.413694	0.333857	0.402284	0.336223	0.358649	0.403685	0.500407	0.368691	0.39857	0.387786	0.379981	0.424586	0.409167	0.370204	0.398275	0.479981	0.374014	0.398447	0.322526	0.429662	0.43033	0.358091	0.311527	0.319078	0.380768	0.597064	0.398588	0.366159	0.385129	0.350006	0.346212	0.385964	0.31747	0.33429	0.388713	0.452135	0.426529	0.307646	0.38964	0.37378	0.368375	0.330475	0.533889	0.403631
	19.9629	0.460856	0.417828	0.368011	0.343687	0.442689	0.335717	0.406497	0.333145	0.367357	0.410314	0.494164	0.387866	0.403329	0.400598	0.398509	0.431006	0.406588	0.356585	0.41038	0.430405	0.382831	0.39379	0.319404	0.434767	0.459582	0.364934	0.326281	0.320008	0.360522	0.592091	0.39325	0.360532	0.391238	0.348555	0.367749	0.38212	0.323118	0.342401	0.38077	0.441401	0.407615	0.330006	0.382261	0.3798	0.379826	0.314488	0.530711	0.400079
	19.9963	0.46014	0.410696	0.361079	0.33882	0.442471	0.332071	0.398415	0.336509	0.368874	0.405295	0.499904	0.385983	0.414026	0.404435	0.382329	0.422613	0.408727	0.369511	0.365914	0.435255	0.361267	0.400404	0.321988	0.419052	0.439027	0.360785	0.316127	0.316157	0.368884	0.577172	0.402302	0.359087	0.382874	0.356236	0.377922	0.39768	0.317843	0.358056	0.382982	0.453832	0.391332	0.315458	0.389282	0.357387	0.365508	0.323183	0.512147	0.391287
	20.0296	0.469566	0.407831	0.359514	0.3323	0.417939	0.326792	0.418562	0.338392	0.369502	0.404686	0.498402	0.385226	0.414455	0.400796	0.381466	0.41705	0.404859	0.358067	0.404542	0.442815	0.364719	0.404965	0.336422	0.421202	0.428613	0.356577	0.315487	0.313068	0.378944	0.590718	0.408145	0.348829	0.385487	0.346049	0.365016	0.405095	0.311557	0.358173	0.392332	0.422417	0.391489	0.31642	0.385228	0.385752	0.382617	0.328638	0.514407	0.405412
	20.0629	0.456289	0.406139	0.369031	0.336664	0.448248	0.333194	0.403456	0.343036	0.368537	0.418968	0.489135	0.382682	0.408998	0.393934	0.38805	0.410564	0.411613	0.360778	0.40632	0.431499	0.392105	0.383669	0.328131	0.430803	0.428722	0.358934	0.296422	0.31853	0.360988	0.550115	0.386182	0.349923	0.387158	0.353204	0.365989	0.398618	0.313161	0.339716	0.397662	0.434426	0.420627	0.321727	0.386338	0.359544	0.368848	0.332061	0.486866	0.396876
	20.0963	0.45108	0.415774	0.357408	0.337155	0.465049	0.345753	0.401617	0.344112	0.363476	0.410497	0.491513	0.382936	0.411573	0.399638	0.396268	0.432203	0.409604	0.372164	0.424708	0.432822	0.392317	0.398096	0.322932	0.426991	0.435233	0.370836	0.31444	0.312315	0.378896	0.587124	0.391999	0.352539	0.387744	0.358077	0.352618	0.410335	0.304259	0.347228	0.382261	0.448742	0.418985	0.32688	0.38421	0.37899	0.383879	0.317467	0.524254	0.401179
	20.1296	0.465519	0.418865	0.359608	0.335182	0.438656	0.338123	0.415103	0.353809	0.373854	0.407014	0.512915	0.377698	0.413582	0.399764	0.380917	0.431092	0.405641	0.368202	0.430086	0.420533	0.396599	0.397904	0.342804	0.416187	0.433972	0.383114	0.316378	0.323223	0.369873	0.597251	0.402783	0.363903	0.384731	0.346133	0.345201	0.420166	0.325758	0.34729	0.392035	0.429068	0.395464	0.325551	0.401216	0.364463	0.376273	0.325319	0.48314	0.391518
	20.1629	0.461227	0.421488	0.362581	0.33175	0.445611	0.33726	0.409558	0.343382	0.365012	0.411067	0.489735	0.386009	0.41013	0.402682	0.38157	0.425147	0.401143	0.361668	0.431695	0.433512	0.391668	0.393428	0.333635	0.429774	0.43779	0.372115	0.309451	0.321991	0.370582	0.625969	0.387245	0.365957	0.379729	0.350092	0.363329	0.378386	0.320316	0.337666	0.383139	0.432623	0.404763	0.327542	0.383799	0.370712	0.383723	0.33551	0.509032	0.409146
	20.1963	0.459775	0.408639	0.360798	0.339364	0.454947	0.3233	0.412455	0.33816	0.359066	0.41836	0.489554	0.370498	0.411896	0.393029	0.392142	0.422412	0.391869	0.358106	0.413127	0.419109	0.384995	0.390841	0.318188	0.427427	0.43625	0.365349	0.315665	0.317251	0.377574	0.561839	0.387123	0.362129	0.382155	0.34063	0.350712	0.376536	0.331423	0.350409	0.384985	0.428657	0.392853	0.316055	0.382425	0.381182	0.364705	0.328243	0.496413	0.400477
	20.2296	0.456707	0.404022	0.363907	0.324713	0.418444	0.336539	0.396494	0.322183	0.357875	0.405353	0.484228	0.382577	0.407457	0.398529	0.385561	0.415308	0.404834	0.356988	0.386643	0.432898	0.376168	0.379373	0.331733	0.422437	0.423569	0.366296	0.30937	0.327247	0.3805	0.570037	0.392717	0.354826	0.381814	0.346059	0.362587	0.429082	0.30607	0.351085	0.383215	0.451386	0.392374	0.316719	0.381413	0.373748	0.36865	0.321807	0.485269	0.399616
	20.263	0.450416	0.40004	0.353381	0.335032	0.441836	0.335186	0.398794	0.332923	0.357639	0.403718	0.49251	0.363059	0.411583	0.406496	0.381803	0.430161	0.405582	0.365878	0.404556	0.431403	0.361589	0.383589	0.316384	0.42642	0.416111	0.36542	0.300264	0.315109	0.371978	0.560651	0.397597	0.374056	0.38278	0.33704	0.35235	0.407884	0.304267	0.341898	0.393021	0.424582	0.398815	0.320192	0.394831	0.385282	0.375976	0.329662	0.465525	0.394474
	20.2963	0.463793	0.409887	0.360084	0.326255	0.426553	0.332424	0.411744	0.34284	0.364793	0.402905	0.497935	0.382005	0.400613	0.401415	0.388527	0.418794	0.405423	0.382756	0.381133	0.43741	0.376548	0.370452	0.327905	0.430299	0.439701	0.374021	0.316423	0.314272	0.386012	0.569754	0.399358	0.348057	0.377329	0.345882	0.35877	0.402887	0.317637	0.347654	0.377711	0.448227	0.408976	0.309311	0.39668	0.37555	0.375365	0.318065	0.48536	0.40223
	20.3296	0.455062	0.409449	0.356611	0.340109	0.430864	0.33169	0.408274	0.321166	0.356385	0.422362	0.4807	0.381603	0.41307	0.396236	0.389847	0.419587	0.400523	0.36425	0.402497	0.412238	0.375878	0.374526	0.322583	0.435084	0.439255	0.357959	0.305234	0.32126	0.384929	0.602162	0.389776	0.353684	0.382839	0.348714	0.369401	0.405779	0.326257	0.346923	0.384557	0.457699	0.404575	0.307771	0.383228	0.344129	0.366814	0.323127	0.471142	0.390563
	20.363	0.453358	0.403989	0.354024	0.327543	0.438156	0.330612	0.396247	0.330738	0.367732	0.402274	0.473193	0.366393	0.418395	0.394642	0.379899	0.41445	0.388061	0.365144	0.398057	0.424066	0.370205	0.368807	0.336245	0.42119	0.395175	0.353693	0.309718	0.311608	0.373515	0.598765	0.384284	0.354844	0.373245	0.341103	0.369767	0.406055	0.299161	0.356796	0.381733	0.444132	0.418021	0.307563	0.390317	0.365129	0.367719	0.326668	0.481258	0.401721
	20.3963	0.448582	0.413769	0.355484	0.322203	0.435786	0.332528	0.38633	0.349806	0.370967	0.40666	0.481371	0.378467	0.410483	0.400936	0.376291	0.422892	0.398175	0.357994	0.41473	0.437441	0.379986	0.377954	0.326326	0.422192	0.432042	0.372321	0.316318	0.311499	0.381572	0.601651	0.391716	0.358442	0.379559	0.356175	0.349997	0.413456	0.326246	0.346904	0.38382	0.446137	0.396473	0.320122	0.394367	0.385209	0.375472	0.320914	0.484486	0.403739
	20.4296	0.463906	0.403755	0.365782	0.330201	0.434989	0.345708	0.394094	0.320898	0.357396	0.412726	0.485025	0.3687	0.38855	0.406134	0.391438	0.427422	0.392535	0.341509	0.401672	0.438142	0.371683	0.383756	0.340555	0.420268	0.423845	0.375127	0.306691	0.318942	0.367049	0.616112	0.394353	0.371833	0.386266	0.353792	0.361119	0.4272	0.30765	0.367878	0.384283	0.452934	0.389982	0.332698	0.390511	0.376981	0.379395	0.327192	0.479461	0.395288
	20.463	0.463601	0.406277	0.355177	0.331285	0.45207	0.330438	0.392705	0.327187	0.370179	0.408933	0.490822	0.380549	0.407186	0.4068	0.382336	0.431839	0.399423	0.357542	0.365285	0.425702	0.381934	0.391024	0.308384	0.413121	0.417641	0.359161	0.308673	0.321791	0.382644	0.677833	0.382592	0.343557	0.379611	0.356054	0.357346	0.395955	0.296108	0.359266	0.388178	0.436947	0.397943	0.32055	0.392951	0.385369	0.369105	0.319652	0.476081	0.400747
	20.4963	0.464286	0.400075	0.358817	0.327824	0.432092	0.321683	0.40914	0.329235	0.369093	0.406082	0.480188	0.377532	0.397336	0.408818	0.385674	0.427209	0.394675	0.353231	0.391266	0.453238	0.386106	0.371097	0.319835	0.42429	0.428742	0.378653	0.304816	0.31905	0.376723	0.59207	0.386722	0.368895	0.377452	0.335035	0.355061	0.39369	0.2854	0.343932	0.365586	0.433349	0.417749	0.307735	0.390032	0.363393	0.364024	0.319463	0.473592	0.403007
	20.5296	0.468187	0.400996	0.361593	0.328953	0.427997	0.335401	0.405816	0.327403	0.371369	0.402902	0.472079	0.374017	0.412409	0.412518	0.378444	0.427066	0.398337	0.354227	0.393511	0.390518	0.378389	0.374725	0.304586	0.434052	0.420287	0.37152	0.309171	0.30838	0.368092	0.605735	0.394748	0.383165	0.373357	0.341434	0.349534	0.40433	0.326238	0.349781	0.378926	0.44828	0.398222	0.311936	0.397856	0.377298	0.374432	0.323505	0.447062	0.390497
	20.563	0.459854	0.411945	0.350172	0.329515	0.416185	0.341732	0.396666	0.334723	0.366135	0.389635	0.469922	0.372474	0.420687	0.413582	0.383901	0.4241	0.398589	0.35895	0.408325	0.423409	0.375754	0.368368	0.321592	0.443525	0.428694	0.368888	0.307406	0.317875	0.371765	0.658959	0.385662	0.337638	0.389891	0.343998	0.357624	0.419272	0.313094	0.338531	0.37902	0.439448	0.397822	0.31595	0.389628	0.387846	0.372178	0.321225	0.478421	0.402039
	20.5963	0.467366	0.410487	0.356128	0.326096	0.441446	0.331694	0.403771	0.335914	0.364972	0.405753	0.474347	0.376955	0.423012	0.402391	0.37422	0.410394	0.392796	0.356666	0.386803	0.431316	0.37892	0.367192	0.324934	0.436779	0.436243	0.382712	0.302943	0.313443	0.361002	0.607063	0.389139	0.361014	0.381275	0.348124	0.357106	0.425432	0.299255	0.339245	0.374099	0.428461	0.400791	0.306824	0.403906	0.3836	0.362093	0.322042	0.466077	0.406639
	20.6296	0.459551	0.40375	0.352728	0.342647	0.428317	0.335581	0.384827	0.327783	0.365214	0.403892	0.49745	0.37343	0.406622	0.412186	0.394566	0.422942	0.400767	0.363246	0.412937	0.415281	0.381798	0.37227	0.329378	0.424714	0.458989	0.370417	0.308166	0.323789	0.366341	0.603305	0.378615	0.372334	0.383534	0.350272	0.352479	0.408647	0.331364	0.3561	0.387266	0.463394	0.412695	0.314773	0.396117	0.369984	0.384129	0.321664	0.464381	0.398463
	20.663	0.469195	0.42007	0.365211	0.330276	0.438432	0.342639	0.39563	0.328877	0.370501	0.393657	0.482304	0.377113	0.412367	0.409113	0.386911	0.416885	0.384173	0.367284	0.392373	0.425821	0.374838	0.375424	0.313673	0.421611	0.426509	0.383191	0.316431	0.307032	0.362624	0.608577	0.388247	0.353104	0.378005	0.337633	0.346863	0.414322	0.32658	0.342626	0.383717	0.448573	0.395355	0.309025	0.402457	0.388718	0.384357	0.31946	0.447674	0.392698
	20.6963	0.471793	0.409943	0.354834	0.327513	0.440883	0.341306	0.402216	0.331738	0.372001	0.399511	0.468865	0.376087	0.416703	0.404634	0.379891	0.428242	0.388027	0.35997	0.420998	0.41253	0.383818	0.365304	0.326699	0.442657	0.400554	0.37075	0.310956	0.311826	0.375015	0.601265	0.388805	0.346028	0.375612	0.33168	0.358183	0.395535	0.298092	0.348422	0.375589	0.435766	0.386157	0.311361	0.388122	0.364426	0.381928	0.321643	0.46155	0.399531
	20.7296	0.471985	0.409001	0.352833	0.32363	0.441451	0.340279	0.409682	0.332881	0.362221	0.398769	0.462833	0.367448	0.41631	0.408295	0.370492	0.415441	0.396821	0.370786	0.405088	0.43058	0.380442	0.34608	0.323508	0.4301	0.432048	0.368632	0.315504	0.31072	0.388107	0.558584	0.389079	0.367145	0.383142	0.335323	0.35229	0.413212	0.312283	0.346806	0.377915	0.453502	0.404974	0.304998	0.400919	0.395321	0.371305	0.32413	0.450398	0.403721
	20.763	0.476406	0.408345	0.351316	0.339565	0.4509	0.32969	0.399368	0.327377	0.372952	0.403707	0.500652	0.3886	0.416857	0.414939	0.377436	0.429661	0.396652	0.358877	0.391688	0.432322	0.382567	0.363917	0.329303	0.449979	0.421456	0.366198	0.318302	0.320575	0.371997	0.571408	0.387805	0.359833	0.383902	0.34276	0.365475	0.412176	0.309505	0.348645	0.383322	0.459795	0.395524	0.320847	0.386096	0.379187	0.382259	0.325298	0.44222	0.398939
	20.7963	0.459079	0.413988	0.361757	0.33419	0.424781	0.335564	0.398936	0.323032	0.375237	0.39321	0.473078	0.37017	0.41769	0.411045	0.386302	0.423959	0.40219	0.363276	0.377104	0.425588	0.389431	0.364445	0.311359	0.433284	0.450121	0.373158	0.306468	0.322333	0.375655	0.512493	0.384596	0.357399	0.382503	0.345601	0.359538	0.3918	0.305534	0.343325	0.376634	0.445005	0.394558	0.315696	0.403712	0.381667	0.367806	0.329368	0.451503	0.394871
	20.8296	0.463057	0.410325	0.337597	0.327516	0.441008	0.330487	0.401769	0.325726	0.367114	0.39897	0.494368	0.385117	0.405111	0.399246	0.386677	0.419688	0.401503	0.351792	0.415422	0.434283	0.394001	0.33845	0.335375	0.429469	0.443555	0.373339	0.318827	0.318286	0.368688	0.548983	0.395042	0.356153	0.383085	0.348864	0.357516	0.425612	0.295619	0.351598	0.382447	0.442125	0.408678	0.316071	0.397593	0.361844	0.383463	0.320482	0.454781	0.395384
	20.8629	0.459447	0.410394	0.350479	0.321512	0.421454	0.348587	0.398677	0.332451	0.371611	0.398327	0.488225	0.376359	0.393824	0.421945	0.380357	0.405108	0.391902	0.350506	0.376282	0.420168	0.364658	0.363043	0.324117	0.42825	0.421299	0.378001	0.30741	0.322258	0.382596	0.548597	0.384769	0.361504	0.378594	0.33985	0.353013	0.389968	0.301119	0.352728	0.376346	0.397624	0.41565	0.314651	0.395658	0.370308	0.368809	0.316137	0.426293	0.39714
	20.8963	0.464877	0.402057	0.354217	0.32627	0.433482	0.334426	0.407651	0.326966	0.368853	0.405732	0.469231	0.375286	0.401125	0.413127	0.383033	0.404928	0.389969	0.369147	0.374338	0.429517	0.385377	0.34869	0.331384	0.414689	0.419848	0.364487	0.303254	0.310502	0.378572	0.527589	0.383451	0.357291	0.375527	0.333161	0.35077	0.416135	0.294309	0.343992	0.377816	0.454509	0.416934	0.31577	0.410413	0.357419	0.372803	0.326526	0.433182	0.395327
	20.9296	0.454176	0.400793	0.346448	0.331261	0.425395	0.339482	0.384732	0.324373	0.370232	0.396127	0.480383	0.368575	0.407215	0.418317	0.383941	0.410791	0.40061	0.36784	0.421116	0.424899	0.375017	0.352037	0.329487	0.430467	0.427424	0.375061	0.308881	0.312986	0.383833	0.552797	0.380991	0.368803	0.369177	0.335776	0.353793	0.393812	0.311768	0.333771	0.376	0.431619	0.412668	0.305945	0.401816	0.361251	0.37973	0.329225	0.429011	0.397539
	20.9629	0.462047	0.406333	0.360857	0.344413	0.439765	0.327196	0.392856	0.330592	0.367159	0.401406	0.476587	0.386386	0.4156	0.406358	0.391359	0.419543	0.386233	0.363495	0.366725	0.442598	0.364598	0.354943	0.3162	0.406304	0.407536	0.371306	0.307917	0.322116	0.36726	0.582139	0.380286	0.362378	0.377576	0.343874	0.356075	0.414779	0.306726	0.331854	0.371857	0.440815	0.396485	0.308927	0.398017	0.382541	0.368076	0.321514	0.439981	0.393604
	20.9963	0.458033	0.407608	0.354462	0.334044	0.442878	0.345497	0.400961	0.320495	0.389568	0.401253	0.47959	0.383326	0.410523	0.412163	0.392109	0.41362	0.393769	0.354955	0.398258	0.430617	0.409351	0.361689	0.321409	0.420385	0.441974	0.38374	0.316027	0.316776	0.368736	0.581244	0.376999	0.366288	0.377827	0.344622	0.352605	0.408478	0.30232	0.341504	0.38941	0.427404	0.41704	0.31064	0.405172	0.375868	0.364041	0.314709	0.450029	0.388029
Figure 5 - Figure Supplement 1B
	Mb1cre/+	Orai1fl/flMb1cre/+	Orai3fl/fl Mb1cre/+	Orai1/Orai3fl/flMb1cre/+
	0.773693	0.038478	1.17805	0.088167
	0.686846	0.105934	1.36476	0.067358
	0.831634	0.045409	1.0684	0.03548
	0.629802	0.074484	1.01963	0.077864
	1.11528	0.095024	0.437613	0.075863
	0.603813	0.094027	0.401569	0.179029
	0.767596	0.092427	0.239659	0.059718
	0.453564	0.113328	0.748254	0.051835
	0.740171	0.102372	0.561113	0.010101
	1.14315	0.142958	0.633043	0.039709
	1.01198	0.12581	0.902043	0.097289
	0.880598	0.105544	1.07465	0.086851
	0.888832	0.139241	0.313304	0.083443
	1.07924	0.082615	0.448007	0.064036
	1.22838	0.08697	0.393643	0.170611
	1.17329	0.172122	1.31634	0.051763
	0.748125	0.150886	0.334023	0.066953
	0.534806	0.126852	0.78647	0.037685
	0.540971	0.06706	0.308334	0.052206
	1.19056	0.088984	1.39942	0.045464
	0.724426	0.08435	1.18055	0.042606
	0.848633	0.102759	0.568337	0.084489
	0.471939	0.059291	0.981179	0.082739
	1.05205	0.092526	0.038568	0.090021
	0.494391	0.263046	0.74879	0.110984
	0.777385	0.105957	0.328535	0.079276
	0.718723	0.107545	0.504082	0.232325
	0.453603	0.204619	0.862287	0.0724
	0.710829	0.102606	1.35817	0.048969
	0.987778	0.095055	0.112725	0.068259
	1.09962	0.117497	0.404672	0.066861
	0.603574	0.044053	0.080954	0.075858
	1.07699	0.178025	0.798245	0.091539
	0.617866	0.083867	0.103911	0.107224
	0.530472	0.151721	1.30682	0.055296
	0.850496	0.111192	1.14734	0.125765
	0.477476	0.076883	0.05151	0.087563
	0.921924	0.124774	0.154584	0.090349
	1.12256	0.071614	0.570427	0.172606
	1.02678	0.103685	0.354926	0.066721
	0.943439	0.083228	0.846169	0.059222
	0.565553	0.076162	0.966582	0.015797
	0.926651	0.099859	1.06748	0.102635
	0.684521	0.241974	0.286272	0.120979
	1.1536	0.131408	1.15478	0.063776
	1.08938	0.132739	0.844023	0.074067
	1.09463	0.078032	1.04698	0.108485
	1.12935	0.098591	1.02473	0.109473
	0.245118	0.080235	0.238723	0.110114
	0.791342	0.164266	1.35521	0.17547
	0.439761	0.409674	1.06845	0.055782
	0.503392	0.06436	0.961902	0.066703
	0.887909	0.096842	0.383246	0.090922
	0.627181	0.224211	0.477874	0.174475
	0.778333	0.244335	1.46636	0.073883
	0.842684	0.211362	0.970714	0.072592
	0.592759	0.057351	0.502821	0.043656
	0.717564	0.100785	0.862584	0.149726
	0.594796	0.142685	0.829041	0.131448
	0.577636	0.071932	1.28326	0.077107
	0.662402	0.072376	1.23574	0.103096
	0.829912	0.054512	0.735759	0.068209
	0.693705	0.158345	0.058783	0.064123
	0.813174	0.065567	0.993013	0.033035
	1.12003	0.065889	0.084633	0.102442
	1.09005	0.125912	0.718381	0.075975
	0.954026	0.065413	0.122118	0.066369
	0.895013	0.07975	0.373563	0.100417
	0.75352	0.128976	1.14833	0.369778
	0.834856	0.126521	0.636624	0.086004
	1.14096	0.075147	1.33463	0.139383
	0.837575	0.181529	0.644618	0.076314
	0.868101	0.085151	1.32951	0.106191
	0.882708	0.112265	0.893332	0.079275
	1.02268	0.226641	0.298418	0.099315
	1.02651	0.145292	0.434992	0.144837
	0.774303	0.09741	0.880866	0.228772
	0.552295	0.112879	1.18063	0.104379
	0.631607	0.179184	0.092167	0.192746
	1.00566	0.150801	0.224402	0.157445
	0.451407	0.088576	0.773466	0.103813
	0.703848	0.112774	0.382992	0.097606
	0.871386	0.167461	0.353575	0.14471
	0.809469	0.152551	0.180982	0.195482
	0.678579	0.083533	0.491	0.067648
	0.844546	0.216037	0.267947	0.075799
	1.22837	0.148453	0.703577	0.089783
	0.822002	0.41896	0.370637	0.076414
	0.65636	0.060628	0.666609	0.214586
	0.766988	0.100502	0.738899	0.064899
	0.804838	0.164114	0.24996	0.08751
	0.749468	0.255503	0.901699	0.059726
	0.587219	0.122347	0.65522	0.068626
	0.730036	0.16773	0.841018	0.076147
	0.819104	0.243068	0.946001	0.045118
	0.723509	0.05566	0.584391	0.101443
	1.2604	0.117211	1.2033	0.117893
	0.935973	0.145361	1.17524	0.079878
	0.913107	0.113736	0.571266	0.144482
	1.06196	0.166112	0.299195	0.063139
	0.628358	0.052336	0.844391	0.243697
	0.31959	0.084422	0.725875	0.062829
	1.00353	0.028442	0.238234	0.187595
	0.338552	0.129419	1.33434	0.046377
	0.944016	0.12189	0.985507	0.141982
	1.12512	0.10761	0.301224	0.143702
	1.27731	0.155757	0.916159	0.176583
	0.384137	0.030598	0.784434	0.063229
	0.75383	0.03466	0.615787	0.083664
	0.260241	0.094201	0.93815	0.106738
	1.26533	0.076171	0.255785	0.110052
	0.959158	0.13018	1.01969	0.213515
	0.458171	0.060824	0.628106	0.033903
	0.919947	0.174559	1.32059	0.258862
	1.14871	0.120134	0.786879	0.161346
	1.26351	0.084291	1.35217	0.120406
	0.716406	0.131703	1.27281	0.102481
	0.286141	0.080176	0.29565	0.086024
	0.453671	0.086535	1.27372	0.188441
	0.876012	0.092211	1.20662	0.199316
	0.760421	0.067377	1.17455	0.095322
	0.639695	0.13535	0.61181	0.150941
	0.980093	0.305174	0.897884	0.121844
	0.781493	0.076152	0.905857	0.121191
	0.487755	0.128634	1.05394	0.05996
	0.34671	0.222873	1.31368	0.121135
	0.864839	0.100615	0.904064	0.08887
	1.01113	0.237061	0.922008	0.091973
	0.968651	0.167658	0.897711	0.123983
	1.09562	0.090425	0.972943	0.081309
	1.07083	0.050929	1.06472	0.122593
	1.12764	0.092021	1.12752	0.006543
	1.51511	0.411393	1.19243	0.019318
	0.911342	0.130991	1.21767	0.092206
	1.10829	0.116798	1.00909	0.127486
	0.818331	0.119636	0.80863	0.130074
	0.721947	0.119158	0.415254	0.361245
	0.404079	0.178029	0.603564	0.176734
	0.882284	0.149684	0.957237	0.118496
	1.14181	0.133229	0.818013	0.064446
	0.7601	0.117188	1.10513	0.069638
	0.703472	0.086404	0.502477	0.092616
	0.285241	0.112719	0.420215	0.087694
	1.49924	0.087503	0.512502	0.058178
	1.26238	0.04822	0.776903	0.20777
	0.501184	0.068435	1.22401	0.171141
	1.04182	0.099126	0.709391	0.113642
	1.06404	0.172557	0.561032	0.166735
	0.76544	0.141516	1.05022	0.124764
	0.786018	0.125435	0.208353	0.138582
	0.765044	0.029528	0.3747	0.067293
	1.1089	0.093059	0.40132	0.120426
	0.833719	0.079058	0.293726	0.134646
	0.687449	0.141303	1.34419	0.07587
	0.986448	0.174641	1.40877	0.16073
	1.00721	0.081541	0.708729	0.078089
	0.344166	0.139913	0.636608	0.134595
	0.706544	0.230568	0.337356	0.135813
	0.941334	0.088171	0.18256	0.136029
	0.522199	0.163901	0.323661	0.149604
	0.693006	0.094745	0.322299	0.110001
	0.410634	0.140044	0.853182	0.068592
	1.08269	0.302706	0.25131	0.277228
	0.325264	0.135625	0.647237	0.109875
	0.261677	0.267933	0.177845	0.201537
	1.08428	0.15468	0.436129	0.063564
	0.307923	0.185765	1.12502	0.151069
	1.06458	0.193787	0.250769	0.138636
	0.949463	0.138783	1.07152	0.300197
	0.369622	0.131627	0.284627	0.287253
	1.02972	0.118347	0.262092	0.127097
	0.860436	0.250507	1.03368	0.083994
	0.779816	0.116128	0.197872
	1.04028	0.127451	0.521767
	0.744455	0.181006	0.674839
	0.171364	0.115602	0.776988
	0.79877	0.179261	0.923664
	0.224652	0.177968	0.610945
	1.17791	0.12621	1.1399
	0.247945	0.14035	1.15446
	1.04332	0.130766	0.371225
	0.968499	0.615791	0.317531
	1.31713	0.254009	0.245961
	0.929781	0.291172	1.10823
	1.2669	0.107563	0.159275
	1.15062	0.09797	0.224868
	0.663481	0.120298	0.227023
	1.30832	0.094743	0.11749
	1.21403	0.117961	0.74775
	1.02938	0.134304	0.874731
	0.461383	0.102178	0.860701
	0.749525	0.082655	0.760152
	0.496881	0.27673	1.19589
	1.08576	0.181158	1.06234
	0.901242	0.210275	0.68049
	0.719989	0.064806	0.376591
	0.995843	0.55759	0.962168
	0.932383	0.199345	0.783693
	0.685585	0.084703	1.09911
	1.4098	0.304884	0.825491
	0.876251	0.047263	0.333767
	0.772869	0.114408	0.413373
	1.22303	0.13644	0.455332
	0.356338	0.089182	0.279506
	1.2559	0.122893	0.086592
	1.14064	0.065822	0.178578
	0.345182	0.187488	0.894723
	0.953701	0.067327	0.30394
	1.09256	0.246262	0.65091
	0.777289	0.105732	0.846968
	1.02582	0.100617	0.96415
	1.21116	0.215841	0.351961
	1.07224	0.125404	0.858519
	1.0642	0.11448	1.38215
	0.956408	0.096565	0.51667
	1.28057	0.148545	0.846245
	1.05832	0.122254	0.053172
	0.994641	0.067447	1.17586
	1.0957	0.176284	0.103649
	1.13207	0.085379	0.168622
	0.481676	0.133398	1.19289
	0.47469	0.064535	0.037515
	0.926113	0.070676	0.773115
	0.874654	0.105154	0.858852
	0.734546	0.029248	0.752338
	0.701971	0.047163	1.02027
	0.664371	0.070483	1.27741
	1.0115	0.056497	1.36061
	0.502983	0.103634	0.454247
	0.733475	0.060758	1.25558
	1.07426	0.156492	0.735397
	0.815741	0.078133	1.09173
	1.28308	0.20472	0.33351
	0.875428	0.083066	1.34262
	1.1199	0.10014	0.302992
	1.02828	0.153257	0.924504
	0.723257	0.054917	0.136368
	0.503552	0.050341	0.959661
	0.986932	0.194775	0.33096
	1.27102	0.110884	1.2012
	0.583523	0.091784	0.060159
	0.639643	0.24468	0.199519
	0.730701	0.144524	0.702164
	0.430011	0.107664	0.37775
	0.704406	0.140479	0.319939
	1.18463	0.212773	0.791086
	0.73872	0.117682	0.207164
	1.32538	0.161772	0.426478
	1.18235	0.134738	0.612971
	1.08336	0.515312	1.52479
	0.382595	0.078017	0.025302
	0.912137	0.378532	0.139222
	0.904878	0.107214	0.290724
	0.721847	0.148085	0.210555
	0.80822	0.101497	0.867884
	1.32911	0.141542	0.253794
	0.335008	0.112036	0.219619
	1.05716	0.497966	0.144247
	0.737889	0.165398	0.614933
	0.970102	0.076134	0.248356
	1.19216	0.05653	0.725744
	0.370703	0.189902	0.384025
	1.13957	0.167072	0.560823
	1.26816	0.190866	0.630593
	1.15635	0.239392	0.950258
	0.910553	0.217599	0.395348
	1.23575	0.148427	0.390565
	1.28841	0.425572	0.755446
	0.823859	0.176638	0.196694
	0.822905	0.134504	0.808539
	0.730293	0.160361	0.884108
	0.762684	0.169041	1.21063
	0.574163	0.165516	0.248151
	0.578631	0.091017	1.21901
	0.489426	0.114235	0.127681
	1.41107	0.155736	0.857016
	0.862819	0.215512	0.618613
	0.528575	0.335509	0.190754
	0.853637	0.122597	0.312273
	0.910346	0.108086	0.476813
	1.00335	0.134846	0.298977
	0.741857	0.119426	0.654144
	1.06759	0.207464	0.26643
	1.22801	0.106736	0.282641
	0.72986	0.187825	0.523694
	0.600457	0.12689	0.556889
	1.1583	0.212312	0.620406
		0.178981	0.538827
			0.297611
			0.186446
Figure 5 - Figure Supplement 1C
	Mb1cre/+			Orai1fl/flMb1cre/+			Orai3fl/fl Mb1cre/+			Orai1/Orai3fl/flMb1cre/+
	-0.09448	0.0006032	287	-0.0004404	0.0002465	288	-0.06067	0.0005722	290	-0.004182	0.0001903	172
[truncated: 989 more columns]
