# Supplementary material for: Orai3 and Orai1 mediate CRAC channel function and metabolic reprogramming in B cells
Source: eLife. 2023 Feb 21;12:e84708. doi: 10.7554/eLife.84708 (PMC9998091; doi:10.7554/eLife.84708)
Supplement: Figure 5—source data 1. [file elife-84708-fig5-data1.xlsx]

## Sheet: Sheet1
Figure 5A
	Orai1					Orai2					Orai3
	Mb1cre/+	Orai1fl/flMb1cre/+	Orai3fl/fl Mb1cre/+	Orai1/Orai3fl/flMb1cre/+		Mb1cre/+	Orai1fl/fl Mb1cre/+	Orai3fl/fl Mb1cre/+	Orai1/Orai3fl/fl Mb1cre/+		Mb1cre/+	Orai1fl/flMb1cre/+	Orai3fl/fl Mb1cre/+	Orai1/Orai3fl/flMb1cre/+
	0.0963949	0.00279281	0.0982543	0.00503598		0.114767	0.115747	0.120024	0.118061		0.130465	0.115316	0.00123651	0.000193117
	0.0988674	0.00224633	0.0977882	0.00326009		0.124714	0.105677	0.108204	0.127596		0.109951	0.0911348	0.00138489	0.000480621
	0.0962642	0.00257052	0.0973242	0.00365617		0.117089	0.109909	0.096285	0.123025		0.120772	0.11033	0.00144428	0.000370916
Figure 5B
	Time (min)	Mb1cre/+
	0	0.403744	0.375669	0.452623	0.396856	0.336742	0.393005	0.462238	0.382686	0.346144	0.429115	0.368011	0.507611	0.40882	0.361788	0.345029	0.415046	0.381565	0.394909	0.354597	0.436461	0.429324	0.342833	0.363365	0.384072	0.362478	0.367692	0.387582	0.392421	0.533682	0.449887	0.386577	0.387177	0.369597	0.336838	0.388068	0.374103	0.34493	0.349081	0.449207	0.359475	0.32774	0.483428	0.395652	0.38943	0.362018	0.418419	0.323009	0.395277
	0.029583	0.416435	0.36054	0.444608	0.403461	0.368522	0.385936	0.436506	0.361618	0.353998	0.378842	0.408194	0.432169	0.406588	0.342467	0.365976	0.394885	0.359411	0.396627	0.393064	0.440191	0.447425	0.396699	0.382025	0.375735	0.374541	0.374355	0.405685	0.420313	0.539845	0.493021	0.388146	0.393858	0.366977	0.349815	0.385801	0.364479	0.330107	0.350088	0.453753	0.348108	0.354511	0.431686	0.40606	0.416714	0.352542	0.410575	0.345117	0.417885
	0.062917	0.407465	0.378534	0.423598	0.407496	0.358093	0.379516	0.439428	0.369479	0.338028	0.382163	0.484014	0.406848	0.402052	0.354285	0.350128	0.382724	0.401806	0.394061	0.396963	0.440665	0.392721	0.384515	0.362118	0.386475	0.379583	0.366162	0.389837	0.394571	0.548912	0.465918	0.395378	0.389219	0.364166	0.347397	0.37673	0.35722	0.342619	0.353295	0.433391	0.332473	0.333739	0.381528	0.396578	0.410996	0.353526	0.379807	0.351333	0.39009
	0.0962	0.406401	0.37107	0.433675	0.370695	0.390936	0.385228	0.430076	0.366756	0.349966	0.397692	0.496148	0.392504	0.40399	0.377495	0.350255	0.384014	0.385015	0.399591	0.400811	0.428374	0.398185	0.364518	0.370625	0.364434	0.368641	0.372444	0.381928	0.41307	0.544131	0.475331	0.399342	0.387613	0.356735	0.324181	0.394233	0.331113	0.351085	0.35219	0.42479	0.35369	0.334731	0.422612	0.40445	0.399407	0.362288	0.455281	0.319205	0.372367
	0.129567	0.416468	0.379725	0.415203	0.396342	0.411716	0.372695	0.391235	0.383329	0.352854	0.407839	0.514568	0.39208	0.409739	0.364713	0.360132	0.376608	0.359815	0.366181	0.440634	0.451738	0.419553	0.371639	0.377079	0.390798	0.382824	0.397005	0.385351	0.411368	0.552045	0.444342	0.392222	0.381474	0.386646	0.340694	0.389229	0.371986	0.342041	0.356268	0.424071	0.354082	0.327974	0.407428	0.416476	0.42704	0.358854	0.467028	0.316754	0.368561
	0.1629	0.381277	0.362015	0.418151	0.383783	0.417226	0.374782	0.418479	0.363147	0.340924	0.392084	0.527165	0.361716	0.411074	0.354855	0.374518	0.391781	0.398914	0.377367	0.524204	0.407675	0.444871	0.35634	0.358973	0.386238	0.371361	0.392026	0.383133	0.388777	0.536279	0.482402	0.378698	0.376926	0.361174	0.348634	0.375126	0.357289	0.332426	0.32734	0.400932	0.324618	0.329967	0.407831	0.436107	0.392305	0.340469	0.448768	0.352793	0.365137
	0.196233	0.398773	0.363819	0.414364	0.398052	0.402955	0.355181	0.415267	0.363914	0.361951	0.374932	0.480197	0.384905	0.425599	0.368612	0.430769	0.41042	0.382935	0.36571	0.519543	0.43327	0.40569	0.360248	0.384762	0.368872	0.369399	0.380727	0.372856	0.412864	0.534607	0.500504	0.382892	0.384258	0.369953	0.338058	0.418696	0.349699	0.335223	0.372829	0.409511	0.349066	0.325713	0.409985	0.419309	0.391456	0.356809	0.42343	0.353784	0.392833
	0.229567	0.39304	0.369747	0.41924	0.367991	0.385754	0.366438	0.385397	0.348881	0.355321	0.366729	0.551926	0.366417	0.418158	0.365059	0.417393	0.39181	0.360674	0.377386	0.47234	0.419594	0.369035	0.360391	0.35507	0.371608	0.363177	0.393342	0.362534	0.374025	0.530048	0.831046	0.396521	0.381539	0.380272	0.334839	0.367746	0.364243	0.331397	0.352952	0.375707	0.383636	0.337286	0.415489	0.391134	0.396438	0.362171	0.380247	0.320873	0.3807
	0.262867	0.386781	0.381715	0.409399	0.366028	0.365395	0.37641	0.353979	0.351945	0.364568	0.368021	0.835047	0.368818	0.401084	0.369205	0.387298	0.382593	0.373479	0.378182	0.448482	0.423202	0.385214	0.382104	0.36176	0.373175	0.374689	0.375244	0.367241	0.396895	0.53561	0.729781	0.412676	0.3845	0.384895	0.345581	0.381113	0.352856	0.334078	0.358052	0.360358	0.357442	0.328663	0.48925	0.451155	0.393774	0.356223	0.377538	0.326928	0.392584
	0.296233	0.406462	0.361075	0.405663	0.380841	0.363889	0.372129	0.388228	0.35179	0.348396	0.382746	0.534037	0.344026	0.418719	0.383387	0.363008	0.392475	0.380589	0.385799	0.403792	0.434634	0.394325	0.371462	0.359783	0.367988	0.369495	0.375796	0.369376	0.383733	0.541004	0.600541	0.385616	0.370533	0.377723	0.348951	0.351363	0.346365	0.340978	0.371145	0.40939	0.378834	0.330616	0.536908	0.401157	0.423954	0.362155	0.35142	0.323731	0.395326
	0.329567	0.394357	0.362244	0.408734	0.382408	0.38346	0.383868	0.344869	0.354244	0.356774	0.37626	0.546511	0.384032	0.423362	0.363351	0.383977	0.391387	0.354457	0.386774	0.391339	0.451435	0.379888	0.349867	0.354749	0.370214	0.378346	0.386475	0.362345	0.381944	0.507549	0.562007	0.388892	0.368993	0.384652	0.361097	0.378494	0.373227	0.333657	0.566113	0.364634	0.358654	0.33343	0.426243	0.410665	0.437125	0.353092	0.358817	0.326507	0.369561
	0.362883	0.422755	0.356204	0.408073	0.382887	0.372489	0.376416	0.359338	0.358262	0.336675	0.381541	0.706904	0.3567	0.404149	0.342884	0.342782	0.421795	0.394695	0.373975	0.381398	0.462044	0.403394	0.389408	0.363935	0.38018	0.363079	0.385291	0.355112	0.400763	0.54305	0.510989	0.377412	0.370442	0.455695	0.354905	0.366868	0.365018	0.349549	0.761563	0.357993	0.361353	0.339136	0.43244	0.429289	0.415924	0.36233	0.395721	0.342363	0.396536
	0.396233	0.43696	0.374695	0.407212	0.364131	0.362597	0.397475	0.377111	0.365581	0.347016	0.35692	0.60239	0.39674	0.405815	0.364398	0.351375	0.443939	0.386175	0.389537	0.380938	0.470618	0.443274	0.380771	0.371456	0.392427	0.416005	0.396951	0.36723	0.418257	0.519659	0.48567	0.380493	0.372138	0.716517	0.330402	0.384326	0.364666	0.334119	0.615057	0.377965	0.376121	0.342961	0.474485	0.456272	0.424272	0.37645	0.467442	0.327828	0.384799
	0.4295	0.465722	0.384876	0.426727	0.374378	0.335931	0.392293	0.380778	0.34799	0.354991	0.37435	0.472118	0.369182	0.405628	0.363296	0.357985	0.498512	0.434984	0.39007	0.407131	0.455241	0.504764	0.327065	0.360942	0.39794	0.369718	0.400889	0.363043	0.526896	0.565339	0.47306	0.38686	0.377073	0.69405	0.355033	0.367818	0.351985	0.359504	0.510161	0.35681	0.371615	0.330267	0.701498	0.476964	0.389767	0.359604	0.436005	0.329256	0.383168
	0.462867	0.958944	0.358038	0.425002	0.351194	0.357362	0.37043	0.370899	0.376765	0.318498	0.359444	0.408713	0.35369	0.402772	0.353459	0.371281	0.545177	0.457281	0.37623	0.367501	0.41032	0.468215	0.3441	0.35301	0.406182	0.372282	0.389752	0.349283	0.774039	0.506125	0.457754	0.381665	0.376835	0.599181	0.329965	0.363157	0.375147	0.350269	0.471763	0.345107	0.36134	0.323917	0.569484	0.45181	0.415328	0.363706	0.45232	0.327718	0.368461
	0.496217	1.2509	0.366879	0.422614	0.374246	0.322976	0.372851	0.373594	0.375921	0.338125	0.377546	0.411766	0.347568	0.415018	0.356307	0.348708	0.550528	0.537317	0.369133	0.391722	0.443227	0.499194	0.381482	0.368017	0.435696	0.361909	0.375873	0.360966	0.784557	0.514109	0.426942	0.35772	0.375272	0.584113	0.365895	0.359733	0.384402	0.325504	0.461502	0.362373	0.36702	0.331753	0.553407	0.424665	0.458465	0.369578	0.405303	0.346781	0.369538
	0.52955	1.02095	0.371814	0.42448	0.404014	0.348965	0.368108	0.35297	0.343849	0.337764	0.355302	0.376015	0.358239	0.404927	0.380196	0.357747	0.506258	0.560207	0.379885	0.398221	0.430529	0.49125	0.339812	0.389206	0.453185	0.373486	0.407009	0.354599	0.697307	0.551828	0.456225	0.371703	0.387201	0.516353	0.362882	0.3717	0.391025	0.345588	0.444686	0.36996	0.362225	0.342695	0.47007	0.429231	0.410637	0.407566	0.389104	0.35843	0.370656
	0.5629	0.83333	0.362181	0.421096	0.37008	0.342403	0.376848	0.351673	0.360749	0.347512	0.373099	0.367475	0.350916	0.412784	0.351949	0.364088	0.451134	0.500646	0.370228	0.394418	0.435377	0.456815	0.349799	0.366624	0.413044	0.384013	0.375046	0.347208	0.569379	0.523261	0.46168	0.371413	0.366889	0.452355	0.365851	0.368837	0.415273	0.330286	0.686753	0.35341	0.375002	0.33251	0.435691	0.381932	0.412164	0.366475	0.373075	0.329426	0.365399
	0.5962	0.705702	0.371931	0.400508	0.361545	0.371583	0.373165	0.346047	0.341205	0.32592	0.379046	0.365294	0.338052	0.415954	0.376881	0.321243	0.432395	0.493864	0.404263	0.38004	0.437906	0.485792	0.405509	0.358017	0.417219	0.34471	0.388232	0.343287	0.540559	0.52602	0.466115	0.395258	0.371963	0.468935	0.375237	0.384383	0.506002	0.330756	0.647843	0.395838	0.370272	0.330644	0.428347	0.435739	0.425182	0.383596	0.408464	0.346212	0.384348
	0.629517	0.627456	0.339772	0.426903	0.380477	0.348346	0.382345	0.333987	0.353996	0.33656	0.383084	0.377866	0.366384	0.418476	0.372569	0.361147	0.435864	0.451117	0.376261	0.372969	0.471874	0.541755	0.370796	0.366402	0.399965	0.369747	0.373043	0.344153	0.519615	0.536093	0.471705	0.365064	0.381734	0.490432	0.416216	0.376925	0.485152	0.354295	0.502385	0.90493	0.382507	0.323207	0.461412	0.438903	0.379399	0.383574	0.362438	0.335679	0.404963
	0.66285	0.556068	0.357915	0.434726	0.375791	0.359642	0.373962	0.377832	0.341814	0.344887	0.384644	0.424978	0.373724	0.409657	0.395278	0.336674	0.427426	0.392451	0.391662	0.404416	0.440722	0.536432	0.37966	0.361487	0.420548	0.363825	0.394285	0.34167	0.487774	0.524076	0.481242	0.36588	0.384179	0.470525	0.403455	0.354853	0.478411	0.325538	0.428554	0.929267	0.3749	0.357463	0.513633	0.450148	0.399491	0.408715	0.374005	0.343878	0.377447
	0.6962	0.495202	0.363613	0.416194	0.377931	0.35336	0.391723	0.372076	0.356239	0.345687	0.403949	0.476587	0.372431	0.404659	0.374329	0.352755	0.43761	0.426656	0.384161	0.380188	0.44621	0.516746	0.363227	0.386956	0.409588	0.411148	0.386944	0.350029	0.50119	0.513824	0.488988	0.393803	0.3756	0.469818	0.410996	0.387817	0.470992	0.356368	0.400524	0.687988	0.351707	0.373312	0.649885	0.526982	0.404773	0.448032	0.371981	0.362164	0.370998
	0.72955	0.470199	0.352055	0.426377	0.373118	0.361886	0.376971	0.372407	0.33463	0.362049	0.385956	0.504774	0.359333	0.406757	0.433023	0.372099	0.428659	0.389844	0.381715	0.37984	0.471719	0.520717	0.381381	0.402527	0.434104	0.373934	0.412701	0.352102	0.526866	0.530648	0.507084	0.394046	0.367335	0.425704	0.408206	0.385071	0.464488	0.315956	0.38992	0.534669	0.376856	0.358365	0.620947	0.559003	0.377218	0.415442	0.375961	0.329663	0.387004
	0.76285	0.462977	0.353953	0.423446	0.358833	0.367268	0.383905	0.370574	0.372652	0.337822	0.405082	0.488519	0.360922	0.422416	0.420491	0.425115	0.438414	0.392059	0.3845	0.378998	0.470715	0.551023	0.366918	0.359585	0.42901	0.406581	0.382759	0.354656	0.502148	0.524216	0.505929	0.358541	0.390627	0.384424	0.391908	0.384238	0.46667	0.330627	0.379615	0.487515	0.381419	0.3802	0.506786	0.59934	0.383096	0.411659	0.369842	0.326451	0.382777
	0.7962	0.425378	0.327969	0.388082	0.353336	0.37889	0.387437	0.34845	0.330387	0.341452	0.387764	0.42322	0.360303	0.392186	0.398931	0.482292	0.637711	0.367689	0.367909	0.380375	0.473845	0.572795	0.357323	0.360325	0.493231	0.400944	0.368398	0.333584	0.493755	0.523366	0.485279	0.383161	0.37872	0.371004	0.409153	0.373263	0.478901	0.33441	0.395347	0.419621	0.363408	0.87453	0.427069	0.565952	0.422344	0.39709	0.384816	0.341313	0.358502
	0.829533	0.409492	0.334444	0.400673	0.35361	0.379625	0.367917	0.33159	0.335177	0.307799	0.378585	0.346474	0.345547	0.389319	0.388242	0.472539	0.613439	0.352269	0.353065	0.372518	0.437129	0.450574	0.347605	0.346313	0.545424	0.362086	0.361241	0.317492	0.434487	0.481432	0.444604	0.328021	0.355194	0.356105	0.359564	0.338928	0.651593	0.305368	0.332317	0.376995	0.346742	0.587812	0.35706	0.460645	0.354239	0.376921	0.340569	0.314037	0.343905
	0.862833	0.421328	0.370834	0.407402	0.358687	0.389502	0.383921	0.368782	0.341665	0.336317	0.360077	0.35911	0.340308	0.394194	0.368639	0.441405	0.501686	0.36394	0.362769	0.3494	0.445667	0.494217	0.361198	0.359103	0.555784	0.361563	0.359412	0.315354	0.440016	0.497233	0.429014	0.38798	0.359364	0.382521	0.365552	0.373836	0.572068	0.314623	0.406395	0.387959	0.360174	0.618418	0.359209	0.455507	0.410136	0.395123	0.40154	0.341201	0.340583
	0.8962	0.412515	0.371283	0.407154	0.364469	0.391895	0.378244	0.342447	0.344465	0.334622	0.360183	0.363051	0.334635	0.386126	0.356254	0.404062	0.443087	0.36338	0.343133	0.340135	0.440767	0.450193	0.33603	0.357305	0.459186	0.357509	0.355805	0.326176	0.441779	0.469915	0.419219	0.366046	0.363862	0.347293	0.415272	0.360523	0.45686	0.338885	0.361045	0.376974	0.35497	0.499862	0.392844	0.409212	0.370719	0.459855	0.347599	0.327996	0.381871
	0.929517	0.403381	0.354476	0.404587	0.368673	0.372782	0.387843	0.342267	0.339887	0.348566	0.368112	0.390082	0.377487	0.421198	0.358923	0.43506	0.470388	0.373389	0.398669	0.38003	0.46194	0.506951	0.338907	0.358907	0.488822	0.363797	0.366122	0.358594	0.440306	0.49711	0.488081	0.382254	0.387468	0.37153	0.628419	0.387892	0.467468	0.328925	0.387512	0.410718	0.379466	0.532466	0.405224	0.461259	0.379165	0.809275	0.424713	0.341385	0.417725
	0.962867	0.385682	0.357189	0.416776	0.364793	0.374437	0.390203	0.363048	0.320613	0.346202	0.36143	0.361756	0.368947	0.428627	0.341452	0.390524	0.502116	0.399136	0.391082	0.394312	0.486062	0.571502	0.323942	0.354902	0.454167	0.334859	0.363335	0.346294	0.399332	0.46814	0.51977	0.365073	0.368083	0.366745	0.537562	0.373114	0.462505	0.307908	0.363404	0.420244	0.363144	0.496278	0.457978	0.457353	0.418484	0.620153	0.421031	0.360317	0.428328
	0.996183	0.41144	0.37117	0.406171	0.37177	0.367336	0.391311	0.357685	0.344087	0.354808	0.373392	0.35186	0.364869	0.420053	0.351795	0.414011	0.665321	0.389787	0.384512	0.363589	0.495372	0.538926	0.38833	0.352168	0.403796	0.347859	0.37666	0.335836	0.394137	0.473034	0.505182	0.368698	0.381417	0.361013	0.470681	0.377438	0.572562	0.322772	0.367353	0.40936	0.367626	0.461332	0.430739	0.407399	0.386477	0.531627	0.419172	0.42771	0.409613
	1.02955	0.409431	0.360493	0.41317	0.371409	0.359283	0.459729	0.381081	0.347195	0.329807	0.353397	0.340322	0.390667	0.435145	0.365398	0.395277	0.72953	0.401971	0.384587	0.367681	0.507418	0.458103	0.336084	0.380398	0.402092	0.369193	0.380506	0.354058	0.37309	0.482648	0.475744	0.392196	0.379442	0.364722	0.427527	0.370995	0.702513	0.3282	0.381372	0.40676	0.362933	0.478062	0.484717	0.419879	0.364316	0.4923	0.413188	0.439676	0.441842
	1.06285	0.394752	0.363951	0.383737	0.362142	0.337261	0.919371	0.378099	0.334411	0.316507	0.385608	0.346669	0.381733	0.46093	0.367767	0.334787	0.616762	0.418676	0.398453	0.376859	0.492489	0.476722	0.356514	0.367344	0.384445	0.351743	0.374653	0.341488	0.377796	0.478536	0.497923	0.369975	0.371174	0.35148	0.387623	0.390067	0.625248	0.32153	0.351155	0.383659	0.370176	0.506203	0.473084	0.379511	0.376641	0.427634	0.434936	0.5134	0.438761
	1.09618	0.37494	0.365026	0.396543	0.358252	0.354429	0.786147	0.377244	0.317266	0.330011	0.385978	0.333914	0.374234	0.484252	0.353421	0.367214	0.53189	0.385048	0.374974	0.369809	0.501999	0.447694	0.367737	0.379969	0.382861	0.374513	0.384501	0.352674	0.406501	0.489328	0.463372	0.365566	0.357021	0.364284	0.374461	0.39697	0.537361	0.338737	0.367993	0.372399	0.341591	0.469142	0.46429	0.384702	0.393502	0.408704	0.394815	0.448991	0.471405
	1.12953	0.379065	0.353852	0.397069	0.340523	0.338585	0.607165	0.363717	0.323904	0.342345	0.403716	0.375908	0.389803	0.733075	0.369535	0.334712	0.469085	0.358473	0.392445	0.389286	0.461562	0.46529	0.363951	0.36926	0.364714	0.356105	0.369857	0.348295	0.423438	0.504165	0.438269	0.360773	0.368045	0.369256	0.348899	0.382873	0.490335	0.324715	0.335966	0.366245	0.350866	0.438482	0.496099	0.393427	0.376087	0.382188	0.371834	0.418246	0.463815
	1.16288	0.383685	0.35909	0.400352	0.369602	0.33934	0.530418	0.340976	0.344968	0.346728	0.398877	0.366497	0.390008	1.1626	0.353332	0.351152	0.441607	0.382231	0.384562	0.385495	0.464745	0.487473	0.338012	0.381939	0.388211	0.371831	0.354248	0.336502	0.402302	0.469711	0.433846	0.349899	0.359322	0.366038	0.368273	0.358284	0.450413	0.349037	0.373848	0.364285	0.357845	0.386665	0.449263	0.384254	0.376503	0.402779	0.400959	0.394225	0.451613
	1.1962	0.377905	0.35171	0.41872	0.365777	0.339936	0.469166	0.365556	0.32844	0.335288	0.36989	0.38974	0.386248	1.03401	0.352168	0.38123	0.436051	0.35577	0.387471	0.37462	0.466693	0.51028	0.362602	0.380894	0.367732	0.356684	0.375312	0.316955	0.408133	0.481584	0.420838	0.37033	0.369615	0.350169	0.338363	0.390387	0.417947	0.348332	0.450661	0.379486	0.348688	0.37041	0.468679	0.418311	0.365018	0.385749	0.38522	0.380888	0.443467
	1.2295	0.405659	0.354768	0.415797	0.361284	0.358436	0.441702	0.361082	0.333267	0.349913	0.378191	0.363146	0.35589	0.954828	0.351409	0.367353	0.438449	0.387253	0.402219	0.403823	0.476518	0.514834	0.377878	0.375216	0.369819	0.354145	0.371412	0.350885	0.390549	0.498908	0.409991	0.388889	0.373804	0.355556	0.340153	0.364437	0.386485	0.349987	0.445516	0.411787	0.357239	0.362264	0.465785	0.403967	0.405793	0.376443	0.381692	0.366269	0.477997
	1.26287	0.400914	0.348091	0.40457	0.367274	0.338488	0.419836	0.439112	0.326434	0.345623	0.375856	0.345584	0.366101	0.975715	0.368271	0.374538	0.405188	0.37695	0.379105	0.386458	0.495394	0.536709	0.349538	0.378417	0.363973	0.369221	0.370149	0.337934	0.392291	0.481377	0.401485	0.376242	0.359466	0.362313	0.335376	0.361791	0.378806	0.337777	0.398574	0.48141	0.380533	0.358978	0.398393	0.393717	0.370955	0.363681	0.390603	0.410744	0.479832
	1.29618	0.402271	0.345008	0.42111	0.359338	0.357519	0.400941	0.862894	0.339812	0.356845	0.379644	0.354481	0.357295	0.960737	0.349224	0.557509	0.398305	0.365348	0.373317	0.39989	0.468384	0.510713	0.334986	0.349863	0.375232	0.355172	0.394843	0.372772	0.357488	0.480543	0.424563	0.368045	0.375823	0.356938	0.359893	0.353923	0.377815	0.365771	0.408151	0.472899	0.353045	0.359273	0.37602	0.381318	0.380348	0.369666	0.391905	0.420932	0.432529
	1.32953	0.401736	0.37602	0.404273	0.363096	0.330968	0.398506	0.716543	0.338105	0.344365	0.372583	0.340891	0.354397	0.87805	0.338957	0.696186	0.386672	0.364983	0.375703	0.408935	0.49552	0.553001	0.317807	0.401687	0.356703	0.360441	0.379405	0.3801	0.397722	0.494152	0.471409	0.360625	0.36904	0.366212	0.359803	0.379966	0.379803	0.343212	0.349222	0.450142	0.351678	0.343526	0.401769	0.403508	0.406802	0.370027	0.386405	1.01172	0.458764
	1.36285	0.388046	0.369595	0.389202	0.357332	0.344968	0.393038	0.654349	0.341849	0.334824	0.368184	0.341799	0.34865	0.906106	0.330784	0.572301	0.365745	0.332538	0.382958	0.382054	0.515817	0.490477	0.35677	0.376651	0.349867	0.348255	0.400265	0.341965	0.412461	0.497467	0.593103	0.367703	0.364657	0.367067	0.340767	0.368585	0.389365	0.348549	0.350193	0.398427	0.361966	0.335611	0.373103	0.381719	0.358352	0.37978	0.458207	0.687276	0.425524
	1.39618	0.397481	0.359123	0.409748	0.368614	0.366827	0.38316	0.696287	0.34691	0.345009	0.402489	0.355944	0.337725	0.866925	0.358504	0.476266	0.367085	0.369504	0.366548	0.439318	0.612762	0.489132	0.368308	0.381527	0.370712	0.345161	0.373951	0.339339	0.505195	0.489311	0.693987	0.379339	0.380062	0.374611	0.349973	0.357005	0.355953	0.340073	0.343321	0.42572	0.330078	0.333496	0.323532	0.386427	0.368739	0.355199	0.660222	0.528495	0.443295
	1.42955	0.403348	0.367196	0.427472	0.379345	0.343445	0.39267	0.653914	0.345333	0.361245	0.397126	0.337037	0.356176	0.836613	0.335907	0.438246	0.368414	0.404419	0.399268	0.565112	0.642417	0.474159	0.336878	0.356371	0.370112	0.394274	0.397387	0.348686	0.880508	0.506493	0.585618	0.380267	0.3635	0.365322	0.349978	0.377883	0.380936	0.342328	0.34008	0.42136	0.34555	0.337487	0.345512	0.424529	0.392792	0.368058	0.690271	0.447509	0.510518
	1.46287	0.39565	0.349754	0.386711	0.349432	0.338257	0.393484	0.54446	0.330953	0.352856	0.383603	0.339373	0.377628	0.751631	0.348215	0.411606	0.35324	0.451697	0.372248	0.73622	0.561993	0.48052	0.359831	0.372464	0.354428	0.333518	0.38887	0.344593	0.704064	0.49729	0.549241	0.379911	0.383024	0.37618	0.348113	0.394005	0.369897	0.322464	0.321886	0.448453	0.364087	0.358054	0.359704	0.4186	0.416333	0.36836	0.521298	0.407307	0.523745
	1.4962	0.381495	0.377605	0.401693	0.357089	0.351642	0.408494	0.511889	0.332809	0.335706	0.384994	0.347772	0.36692	0.71398	0.356443	0.414546	0.354273	0.488616	0.384187	0.57499	0.505214	0.534379	0.338618	0.371256	0.362873	0.38091	0.39225	0.327839	0.55873	0.505555	0.51326	0.391207	0.371228	0.36938	0.357769	0.404762	0.438289	0.337485	0.351989	0.56402	0.361245	0.310961	0.36509	0.44092	0.378508	0.382668	0.44629	0.404997	0.509054
	1.52953	0.393228	0.368536	0.411361	0.382378	0.336568	0.402607	0.451498	0.345741	0.350578	0.36314	0.352908	0.353727	0.699558	0.37117	0.400658	0.341836	0.487355	0.354917	0.528707	0.494632	0.475352	0.380894	0.354068	0.411455	0.360098	0.42404	0.331673	0.525018	0.487934	0.483949	0.358463	0.372178	0.453932	0.36729	0.392705	0.666683	0.334418	0.326064	0.871499	0.337948	0.338508	0.356218	0.409278	0.415305	0.369653	0.424055	0.368582	0.527317
	1.56287	0.403597	0.398692	0.407227	0.356721	0.341909	0.398969	0.437156	0.34528	0.355492	0.374917	0.354075	0.346396	0.638102	0.394488	0.388463	0.338648	0.695006	0.375416	0.458514	0.520666	0.438197	0.345326	0.35277	0.417988	0.371102	0.413499	0.345966	0.488301	0.499492	0.485005	0.379208	0.367562	0.545046	0.368998	0.410767	0.640054	0.308794	0.360679	0.924908	0.352524	0.345819	0.344212	0.415261	0.460037	0.363455	0.476876	0.354434	0.504827
	1.5962	0.385996	0.432697	0.407142	0.357079	0.354181	0.406035	0.384935	0.357551	0.356426	0.367304	0.387022	0.363944	0.610353	0.386294	0.380196	0.377483	0.661476	0.367911	0.450194	0.470025	0.437257	0.388473	0.382265	0.434492	0.367296	0.478933	0.358948	0.451243	0.487032	0.473141	0.348029	0.370415	0.881206	0.392457	0.429557	0.486073	0.338509	0.358469	0.845707	0.362823	0.326061	0.364162	0.444951	0.447246	0.360692	0.461711	0.34851	0.512494
	1.62952	0.435373	0.505318	0.419788	0.378838	0.43482	0.394315	0.387706	0.373512	0.371272	0.365374	0.810369	0.370661	0.562938	0.410088	0.357832	0.381281	0.530135	0.381661	0.467832	0.49846	0.389824	0.320175	0.385505	0.534358	0.370602	0.75729	0.408293	0.466864	0.500899	0.494147	0.361787	0.372207	0.730029	0.381379	0.447593	0.439373	0.351554	0.368704	0.683728	0.353717	0.342598	0.402637	0.401611	0.405597	0.354727	0.535822	0.36124	0.738901
	1.66288	0.445181	0.636359	0.408466	0.379349	0.89082	0.391509	0.362545	0.394109	0.355566	0.372806	0.705746	0.363747	0.509813	0.443945	0.394713	0.393941	0.470138	0.391747	0.419731	0.535933	0.402595	0.342446	0.402707	0.459963	0.366081	0.78386	0.435793	0.450268	0.484835	0.494238	0.359898	0.37512	0.619322	0.425736	0.479457	0.410696	0.338962	0.426378	0.570389	0.359483	0.339323	0.415617	0.42869	0.441774	0.357832	0.509953	0.370529	0.725181
	1.69617	0.435824	0.717077	0.410487	0.428875	0.657137	0.39451	0.367032	0.386719	0.36351	0.395015	0.824914	0.346833	0.481364	0.434673	0.476118	0.381243	0.47402	0.386879	0.413136	0.556342	0.385744	0.364181	0.362818	0.477776	0.398569	0.674512	0.895651	0.42988	0.474228	0.507881	0.362275	0.370101	0.608273	0.500658	0.52169	0.375847	0.337674	0.420404	0.530716	0.367962	0.341612	0.393901	0.401095	0.436776	0.3532	0.479208	0.332911	0.644853
	1.72953	0.449818	0.704706	0.42017	0.455836	0.509967	0.382303	0.339688	0.392088	0.379797	0.410902	0.72117	0.342291	0.47581	0.469931	0.677478	0.397434	0.465076	0.36951	0.393114	0.696499	0.364435	0.349473	0.361294	0.447102	0.391754	0.608816	0.777472	0.431815	0.484586	0.55144	0.362484	0.366377	0.678409	0.482155	0.514753	0.368584	0.330494	0.375876	0.455524	0.369958	0.340885	0.40042	0.422617	0.358614	0.370763	0.411112	0.333088	0.546198
	1.76288	0.512586	0.626656	0.407171	0.453156	0.462135	0.394051	0.35432	0.373033	0.392964	0.403464	0.586453	0.383186	0.44914	0.453999	0.580626	0.400494	0.432683	0.388935	0.391406	0.711583	0.365966	0.37293	0.356217	0.452888	0.375887	0.565609	0.597252	0.411343	0.479364	0.588561	0.363954	0.375273	0.617503	0.448186	0.445686	0.358713	0.335538	0.394879	0.430162	0.370427	0.340186	0.568663	0.396224	0.375145	0.367834	0.433202	0.33293	0.519165
	1.7962	0.842886	0.583454	0.421844	0.423751	0.424343	0.388869	0.375262	0.38399	0.411518	0.438339	0.481255	0.340465	0.438564	0.44692	0.555842	0.431745	0.448672	0.368854	0.378188	0.72828	0.382109	0.386702	0.38648	0.416789	0.382352	0.585507	0.501611	0.423633	0.508927	0.583259	0.356462	0.390314	0.523276	0.403202	0.443879	0.38153	0.343882	0.398775	0.456939	0.355809	0.329368	0.741846	0.406509	0.397236	0.341081	0.435666	0.350881	0.436867
	1.82952	0.914493	0.582247	0.423878	0.450318	0.429878	0.411165	0.389281	0.369949	0.602196	0.45116	0.464206	0.393836	0.447163	0.407363	0.515165	0.417025	0.437105	0.378628	0.406728	0.665697	0.348904	0.374967	0.363114	0.39282	0.386442	0.602191	0.441611	0.422767	0.482563	0.507851	0.376036	0.369838	0.459601	0.394715	0.431276	0.357542	0.370002	0.475305	0.526185	0.389042	0.354952	0.536003	0.408117	0.435878	0.356178	0.428301	0.347655	0.458941
	1.86287	0.726648	0.659886	0.41176	0.43337	0.41996	0.400702	0.365146	0.357829	0.636554	0.481773	0.434936	0.381025	0.437959	0.425403	0.59426	0.408819	0.388413	0.378823	0.393612	0.699721	0.359489	0.375361	0.3761	0.382985	0.380298	0.54805	0.389878	0.399087	0.501722	0.462722	0.378	0.389052	0.459581	0.370182	0.399946	0.369616	0.332549	0.582267	0.734049	0.387125	0.341395	0.470612	0.408349	0.403461	0.365727	0.505792	0.370122	0.423018
	1.8962	0.58436	0.660072	0.43712	0.44938	0.378128	0.408462	0.45268	0.374141	0.71591	0.58944	0.426084	0.405381	0.438161	0.404586	0.465787	0.393941	0.403155	0.384207	0.37849	0.697257	0.353586	0.370924	0.345349	0.380597	0.372406	0.524744	0.399241	0.424481	0.500261	0.522624	0.379207	0.387137	0.45197	0.368202	0.419727	0.336621	0.343587	0.444033	0.656049	0.364732	0.381926	0.422849	0.421365	0.374199	0.364301	0.586276	0.388688	0.416948
	1.92952	0.523536	0.668742	0.393273	0.46276	0.351244	0.416201	0.44856	0.32734	0.619979	0.694226	0.398503	0.339971	0.431174	0.382588	0.467698	0.393872	0.397813	0.354413	0.385666	0.613614	0.357655	0.355894	0.376618	0.372455	0.356727	0.528297	0.372831	0.379692	0.474788	0.440908	0.379283	0.335981	0.379426	0.346725	0.381398	0.329096	0.316642	0.402746	0.612588	0.353928	0.457936	0.376083	0.349689	0.370047	0.365326	0.623237	0.351934	0.42492
	1.96285	0.47447	0.624549	0.391011	0.473587	0.350184	0.601137	0.425159	0.364657	0.560897	0.596737	0.414851	0.359407	0.450764	0.404789	0.476909	0.402799	0.390673	0.397605	0.374996	0.54159	0.347788	0.367371	0.38217	0.376155	0.363177	0.482104	0.362243	0.370062	0.465257	0.471706	0.366694	0.380752	0.399997	0.334485	0.382239	0.329954	0.323653	0.370166	0.565611	0.358269	0.905518	0.394967	0.384413	0.366704	0.368387	0.536223	0.403026	0.37503
	1.99618	0.508543	0.761428	0.418412	0.472329	0.376167	1.12709	0.495296	0.355578	0.583747	0.57787	0.41862	0.393661	0.533508	0.403726	0.588808	0.601402	0.431654	0.406786	0.393623	0.578321	0.369178	0.343438	0.378612	0.458521	0.381512	0.512149	0.392254	0.389642	0.465715	0.503706	0.366539	0.399739	0.422447	0.340173	0.391718	0.353455	0.335101	0.381548	0.644548	0.387043	0.91042	0.462391	0.386154	0.392742	0.371509	0.557985	0.728858	0.401381
	2.02955	0.521104	0.805431	0.439615	0.497175	0.374835	0.985352	0.489759	0.376574	0.654098	0.674096	0.493689	0.412474	0.995937	0.473078	0.644187	0.721925	0.444137	0.442076	0.39407	0.668567	0.449185	0.387216	0.384198	0.972448	0.402511	0.513155	0.423231	0.402619	0.47253	0.59137	0.36728	0.41819	0.427701	0.355594	0.394715	0.384499	0.347168	0.401539	0.675354	0.415433	1.01504	0.661991	0.399572	0.395716	0.377871	0.544109	0.918472	0.403668
	2.06292	0.513278	0.837117	0.49414	0.516345	0.421698	1.03824	0.529051	0.410133	0.705098	0.723789	0.50209	0.422783	1.20892	0.514444	0.727284	0.717304	0.491572	0.460066	0.425528	0.754747	0.50453	0.38732	0.414608	0.909453	0.42235	0.55877	0.411113	0.406879	0.504835	0.638917	0.386583	0.429237	0.480464	0.384619	0.417258	0.359742	0.394761	0.440936	0.789119	0.417925	1.04274	0.888687	0.434112	0.430131	0.391583	0.683099	0.887047	0.431826
	2.0962	0.540443	0.880623	0.497874	0.518854	0.428361	1.11313	0.676478	0.446296	0.713473	0.748337	0.639377	0.456008	1.22891	0.643089	0.706977	0.744073	0.481619	0.526532	0.425597	0.866295	0.564794	0.396316	0.436564	0.92503	0.455707	0.627727	0.423735	0.433619	0.525401	0.671341	0.396441	0.459144	0.496324	0.40918	0.433269	0.376262	0.378862	0.482122	0.841317	0.448704	1.04635	0.887518	0.463147	0.448993	0.447612	0.776956	0.865851	0.430127
	2.12952	0.714241	0.839539	0.50972	0.560985	0.438781	1.11413	0.793056	0.476684	0.775113	0.731122	0.800174	0.40621	1.31635	0.866659	0.723805	0.734055	0.519255	0.636572	0.468762	0.969926	0.555261	0.446165	0.468839	0.888012	0.50342	0.705205	0.452773	0.436929	0.55637	0.785059	0.415727	0.501567	0.518631	0.404721	0.457509	0.379438	0.390114	0.471992	0.890242	0.477411	1.05395	0.927446	0.46588	0.486004	0.503811	0.785481	0.864114	0.452851
	2.16285	0.926099	0.883387	0.527092	0.589477	0.444797	1.16958	0.851867	0.524298	0.792371	0.763099	0.858921	0.45189	1.27701	1.01693	0.731174	0.768304	0.590378	0.695174	0.439609	1.00455	0.572256	0.459652	0.465397	0.893547	0.510055	0.719938	0.466597	0.448189	0.556008	0.806976	0.424228	0.490902	0.540639	0.443619	0.480509	0.355015	0.404368	0.549795	0.819278	0.452687	1.10854	0.817944	0.633711	0.599927	0.649288	0.846292	0.95748	0.481944
	2.19618	0.964963	0.918454	0.567942	0.60419	0.486395	1.22756	0.88213	0.54771	0.801765	0.72929	0.916722	0.463499	1.33845	0.995775	0.774047	0.765355	0.6945	0.7306	0.485552	1.02916	0.521084	0.469658	0.483927	0.841869	0.528649	0.759516	0.470107	0.453548	0.579892	0.796172	0.42642	0.517056	0.577668	0.457974	0.529124	0.387482	0.414902	0.556589	0.801985	0.495956	1.02606	0.795917	0.743117	0.647766	0.711822	0.937008	0.965103	0.574111
	2.22953	0.92396	0.855331	0.563501	0.644277	0.472199	1.20925	0.936072	0.573434	0.819938	0.771418	1.00991	0.510688	1.30287	1.02998	0.831105	0.804235	0.722035	0.747273	0.501121	0.994479	0.533868	0.543396	0.521209	0.832819	0.554026	0.789081	0.499522	0.529176	0.59129	0.805811	0.447069	0.540445	0.558478	0.553349	0.583797	0.431798	0.436525	0.63807	0.810969	0.516739	1.0508	0.834497	0.751074	0.853854	0.797331	0.863925	0.964467	0.584451
	2.26287	1.07459	0.924583	0.584517	0.676757	0.512843	1.19841	0.983107	0.579201	0.798025	0.772432	0.988013	0.511452	1.2494	1.0328	0.811414	0.78161	0.723254	0.767997	0.555055	1.044	0.476691	0.466247	0.528484	0.833515	0.614636	0.798225	0.545291	0.521656	0.607395	0.854843	0.430162	0.555015	0.597872	0.596874	0.753773	0.463398	0.463198	0.718857	0.885094	0.518279	1.01997	0.787739	0.746399	0.938868	0.788814	0.872868	0.992651	0.670992
	2.29618	1.20247	0.921303	0.591405	0.657372	0.590968	1.20213	1.01546	0.573995	0.809252	0.815179	0.992335	0.562121	1.25572	1.07044	0.800685	0.791409	0.744608	0.78302	0.546229	1.00531	0.513154	0.504251	0.532664	0.833588	0.633714	0.825318	0.519936	0.567768	0.618391	0.8394	0.468966	0.570099	0.668699	0.700764	0.866473	0.509383	0.472838	0.82953	0.878392	0.553416	1.01576	0.731954	0.791073	0.975415	0.807338	0.866087	0.975697	0.792333
	2.32953	1.12995	0.898839	0.631156	0.744448	0.568266	1.2044	1.06671	0.584814	0.783376	0.797242	0.932155	0.636712	1.30988	0.937856	0.77972	0.786859	0.760676	0.801567	0.584628	1.022	0.461272	0.546083	0.527187	0.820067	0.66453	0.838601	0.569877	0.546965	0.631451	0.807873	0.474477	0.586183	0.742193	0.662043	0.827207	0.496632	0.486148	0.853573	0.817195	0.551857	0.979955	0.680412	0.766532	0.974353	0.772407	0.897417	0.986835	0.851937
	2.36285	1.13001	0.92809	0.652433	0.692308	0.659769	1.23596	1.08556	0.604456	0.812848	0.79304	0.866779	0.797033	1.28767	0.990863	0.810471	0.770139	0.786674	0.793436	0.582875	0.981269	0.443892	0.548635	0.54089	0.794435	0.717973	0.789542	0.584103	0.624058	0.649773	0.795782	0.489752	0.609507	0.856657	0.684806	0.848634	0.52792	0.514511	0.864408	0.844823	0.580731	0.933827	0.656764	0.819088	0.96446	0.821927	0.863105	0.984705	0.918235
	2.3962	1.12367	0.934372	0.705571	0.72181	0.730566	1.20545	1.03445	0.584646	0.806563	0.792842	0.840554	0.80309	1.25503	0.964515	0.779701	0.803816	0.846539	0.83547	0.572206	0.962595	0.465171	0.592213	0.531055	0.811633	0.712444	0.848947	0.648943	0.607276	0.650028	0.799285	0.463842	0.617078	0.916308	0.750219	0.851663	0.603128	0.519609	0.893621	0.776586	0.614832	0.991714	0.680148	0.781069	0.948603	0.813375	0.93487	0.957535	0.883052
	2.42952	1.13004	0.920469	0.721271	0.76217	0.747393	1.19363	1.06361	0.606208	0.790114	0.836049	0.866267	0.84214	1.28877	0.945279	0.774629	0.815883	0.837016	0.867639	0.637539	0.977778	0.421054	0.567709	0.595447	0.852467	0.776924	0.859696	0.613696	0.594443	0.628268	0.783786	0.480551	0.646495	0.914138	0.736937	0.857234	0.652328	0.522712	0.858675	0.816463	0.628121	0.909549	0.68538	0.813269	1.01272	0.825783	0.83748	0.941092	0.962818
	2.46285	1.13574	0.848704	0.726446	0.741466	0.730285	1.17929	1.0989	0.635753	0.800806	0.819786	0.85598	0.863446	1.27507	0.853081	0.717611	0.81465	0.758201	0.86743	0.68506	0.962958	0.413966	0.547917	0.571119	0.793401	0.852489	0.821867	0.653089	0.584364	0.691289	0.784349	0.527151	0.648493	0.909259	0.721931	0.901603	0.694043	0.515764	0.869195	0.777566	0.660004	0.910677	0.654842	0.775456	0.983328	0.827844	0.781401	0.925263	0.914028
	2.49615	1.09688	0.876844	0.775241	0.789442	0.729909	1.21318	1.05693	0.66605	0.800145	0.825111	0.810606	0.804038	1.22072	0.885704	0.706331	0.78987	0.743518	0.903983	0.696569	0.997807	0.404303	0.604622	0.595642	0.797015	0.771016	0.784134	0.634848	0.617809	0.689084	0.795928	0.502602	0.663852	0.953188	0.737279	0.900001	0.785916	0.532049	0.974418	0.738458	0.675301	0.891283	0.583107	0.805174	1.04048	0.7837	0.775886	0.881197	0.96602
	2.52948	1.08973	0.851523	0.728968	0.81287	0.785303	1.24925	1.05123	0.628529	0.834489	0.845771	0.824884	0.813582	1.18309	0.906229	0.743387	0.765584	0.702407	0.878164	0.726667	0.996604	0.459642	0.601686	0.573063	0.822099	0.847159	0.813321	0.705512	0.646433	0.699798	0.747702	0.503517	0.704752	0.991528	0.772759	0.89234	0.807058	0.585526	0.909649	0.731543	0.637459	0.891622	0.593222	0.772083	1.01489	0.858614	0.776517	0.887892	0.952368
	2.56285	0.991841	0.869217	0.792967	0.835705	0.821318	1.1775	1.00545	0.66011	0.801561	0.868084	0.84136	0.892934	1.21378	0.864857	0.751072	0.741675	0.747937	0.874343	0.702957	1.01192	0.399635	0.696624	0.637243	0.798971	0.942559	0.869459	0.721422	0.660625	0.737616	0.770959	0.497573	0.708041	0.952998	0.773381	0.90488	0.762377	0.556454	0.91653	0.768198	0.714888	0.842363	0.538835	0.735979	1.02926	0.841905	0.758142	0.889638	0.920863
	2.59618	1.01006	0.880661	0.748771	0.805946	0.802848	1.17448	1.04657	0.623273	0.795654	0.812867	0.839586	0.828706	1.2071	0.845651	0.691136	0.767087	0.759008	0.92267	0.718946	0.901572	0.434764	0.66721	0.624855	0.86605	0.921384	0.824446	0.669254	0.625814	0.711263	0.722993	0.560781	0.707637	0.954267	0.781839	0.926394	0.65855	0.591867	0.95022	0.778347	0.736072	0.852475	0.622335	0.763079	1.05293	0.833915	0.723704	0.835205	0.927925
	2.62953	1.01112	0.880802	0.708558	0.833719	0.837509	1.20693	1.09871	0.613224	0.804502	0.769041	0.757096	0.880132	1.23784	0.779751	0.633528	0.76725	0.819637	0.891687	0.692279	0.923891	0.381629	0.661393	0.638567	0.824606	0.888845	0.817097	0.727879	0.671813	0.688975	0.708418	0.53726	0.698725	0.976523	0.81006	0.90079	0.691765	0.616446	0.917702	0.721866	0.709852	0.889103	0.540201	0.788493	0.992279	0.847108	0.72282	0.831964	0.941187
	2.66287	0.987535	0.931763	0.797837	0.864739	0.867375	1.19918	1.0232	0.67129	0.806227	0.83159	0.710146	0.799466	1.18409	0.790406	0.654722	0.76818	0.733046	0.925789	0.708544	0.966851	0.408928	0.658985	0.658752	0.815045	0.88703	0.841333	0.748641	0.640271	0.708849	0.701782	0.489413	0.753708	0.914701	0.780456	0.907909	0.691106	0.577493	0.894765	0.752153	0.760531	0.88377	0.549529	0.759236	0.97389	0.884768	0.774633	0.833988	0.873148
	2.6962	0.96022	0.819076	0.782484	0.922628	0.854483	1.16919	0.987776	0.670375	0.821244	0.813856	0.786964	0.843297	1.17092	0.759046	0.708304	0.79179	0.690519	0.908369	0.746369	0.902057	0.377432	0.743807	0.634756	0.786737	0.85712	0.817288	0.748268	0.666609	0.721581	0.713231	0.529416	0.771335	0.944732	0.751341	0.940953	0.701841	0.601654	0.908295	0.704054	0.750102	0.816915	0.508335	0.745218	0.94872	0.858376	0.69285	0.794978	0.961413
	2.72947	0.917146	0.814885	0.806125	0.923768	0.867602	1.14022	1.04715	0.682367	0.818195	0.820269	0.743367	0.767593	1.16153	0.780024	0.67354	0.747015	0.718201	0.970017	0.733026	0.885477	0.421573	0.723365	0.663469	0.76994	0.817356	0.839712	0.723373	0.663131	0.726462	0.684935	0.556148	0.734275	0.974932	0.77458	0.93635	0.613658	0.594526	0.942229	0.729175	0.784082	0.843138	0.522442	0.766289	0.918904	0.863725	0.740041	0.827884	0.893556
	2.76282	0.944954	0.819721	0.810061	0.949471	0.894607	1.21485	0.949774	0.687291	0.804388	0.850179	0.716164	0.761842	1.09572	0.761369	0.703741	0.781592	0.76366	0.920274	0.81326	0.947411	0.40987	0.82247	0.647783	0.798802	0.934095	0.833802	0.769026	0.634044	0.739944	0.682516	0.582489	0.7687	0.964188	0.775449	0.892941	0.646796	0.63223	0.966603	0.715365	0.811905	0.778035	0.502708	0.73803	1.02495	0.894163	0.685433	0.79258	0.844028
	2.79618	0.900114	0.840657	0.835171	0.917224	0.830672	1.09073	0.989877	0.664524	0.838079	0.809981	0.707063	0.777493	1.0843	0.728903	0.636545	0.743852	0.733957	0.953012	0.805812	0.879388	0.437066	0.721859	0.673958	0.794671	0.867531	0.809026	0.708578	0.592107	0.730803	0.648245	0.569985	0.763398	0.906382	0.787355	0.948768	0.627033	0.644858	0.898978	0.697857	0.75147	0.79031	0.495841	0.746953	1.01233	0.907869	0.735262	0.775909	0.870266
	2.82953	0.846495	0.802307	0.84523	0.902409	0.8895	1.14158	0.925271	0.683209	0.777616	0.753677	0.710476	0.800066	1.08729	0.730541	0.655421	0.793292	0.746764	0.933561	0.758607	0.867382	0.37749	0.79658	0.713588	0.78344	0.907324	0.748252	0.749359	0.602719	0.730896	0.631508	0.588543	0.759346	0.91251	0.778806	0.907769	0.600588	0.6374	0.917176	0.687545	0.760395	0.758943	0.481751	0.718205	0.972913	0.89585	0.636351	0.845177	0.866729
	2.86285	0.906001	0.829502	0.811794	0.952581	0.892655	1.08143	0.967162	0.698087	0.78374	0.715761	0.658956	0.778248	1.15558	0.683368	0.65178	0.712819	0.693038	1.00291	0.811015	0.84434	0.338586	0.81635	0.701778	0.810483	0.899428	0.826596	0.737629	0.567934	0.755163	0.694312	0.619813	0.751459	0.942246	0.768019	0.921567	0.617248	0.64559	0.885412	0.683898	0.82114	0.766245	0.479248	0.690956	0.975647	0.918578	0.554905	0.84615	0.887166
	2.89613	0.855582	0.776715	0.834682	0.906202	0.847206	1.12145	0.938147	0.699536	0.777281	0.737548	0.661276	0.782036	1.05855	0.68222	0.625975	0.783621	0.67697	0.972068	0.884425	0.808794	0.372821	0.87831	0.726262	0.776102	0.89274	0.775956	0.712384	0.650667	0.731372	0.652898	0.567545	0.77525	0.891792	0.819459	0.904395	0.60035	0.6356	0.913183	0.66419	0.800041	0.716838	0.457737	0.697802	0.853768	0.924529	0.667049	0.780191	0.866256
	2.92952	0.812624	0.788318	0.859311	0.913417	0.861892	1.09252	0.926138	0.718021	0.762104	0.740083	0.638465	0.726022	1.08688	0.652895	0.640631	0.79102	0.703846	0.976222	0.868889	0.883717	0.376507	0.798362	0.725994	0.77382	0.893816	0.784155	0.808743	0.577153	0.718221	0.618325	0.552197	0.772271	0.922631	0.7794	0.89791	0.588467	0.66311	0.900418	0.673087	0.849656	0.741379	0.444945	0.677334	0.890459	0.933085	0.622618	0.801252	0.882789
	2.96287	0.806453	0.810558	0.808055	0.939043	0.966403	1.07614	0.916227	0.696304	0.777994	0.711414	0.62871	0.788055	1.03793	0.679568	0.639912	0.794056	0.7144	0.918159	0.954498	0.904906	0.415585	0.77705	0.706159	0.747699	0.932122	0.754772	0.769518	0.573611	0.71652	0.654547	0.581784	0.822331	0.927488	0.820377	0.947014	0.591713	0.665292	0.871857	0.599366	0.929502	0.738021	0.458396	0.699082	0.978614	0.907139	0.628513	0.794865	0.896137
	2.9962	0.781179	0.799814	0.774595	0.99167	0.887773	1.0543	0.874079	0.677118	0.758727	0.712486	0.610148	0.781129	1.06116	0.640658	0.639433	0.743621	0.697154	0.952104	0.871791	0.848352	0.347594	0.740015	0.755513	0.750598	0.932354	0.791065	0.728649	0.555269	0.752915	0.610064	0.58686	0.800433	0.945098	0.766785	0.896558	0.582969	0.663498	0.865925	0.668468	0.825294	0.751166	0.42425	0.685607	0.93949	0.962566	0.581499	0.760629	0.88957
	3.02953	0.768244	0.746357	0.820292	0.914317	0.915322	1.02389	0.878193	0.652194	0.741326	0.700223	0.593031	0.746814	0.97999	0.623548	0.60733	0.739897	0.699263	0.969392	0.887129	0.833396	0.372863	0.826975	0.722328	0.737608	0.98217	0.802613	0.787684	0.562257	0.705151	0.599075	0.585646	0.777259	0.952869	0.806509	0.881452	0.557036	0.686401	0.825812	0.624794	0.785418	0.732278	0.455768	0.63305	0.852645	0.911648	0.579931	0.757388	0.856077
	3.06288	0.739214	0.772411	0.786735	0.880739	0.830848	1.04589	0.857816	0.671908	0.735355	0.680153	0.568107	0.72369	0.950413	0.638377	0.625759	0.773728	0.68157	0.972478	0.883853	0.857822	0.377691	0.840586	0.742841	0.720283	0.879738	0.801841	0.795952	0.531063	0.691619	0.589217	0.570444	0.825251	0.944522	0.777174	0.866244	0.570518	0.714864	0.840805	0.596198	0.833773	0.712825	0.440012	0.712013	0.915307	0.915592	0.637691	0.804065	0.902581
	3.09618	0.745922	0.74744	0.809519	0.898908	0.87834	1.01642	0.87905	0.660324	0.762836	0.681197	0.585517	0.773705	0.974005	0.60777	0.627574	0.801383	0.659288	0.964081	0.828988	0.883246	0.38118	0.865869	0.710759	0.700105	0.951349	0.778579	0.757731	0.591559	0.715263	0.591287	0.590871	0.81349	0.923671	0.751762	0.940083	0.522474	0.731773	0.872045	0.579095	0.867097	0.686566	0.459723	0.658294	0.841059	0.950103	0.636765	0.772091	0.888876
	3.1295	0.749788	0.770478	0.753505	0.940295	0.869292	0.975385	0.860117	0.704852	0.752264	0.64475	0.579161	0.727587	0.95078	0.598678	0.636466	0.757186	0.654035	0.966036	0.845426	0.862524	0.3536	0.750996	0.75186	0.723279	0.882138	0.748293	0.729855	0.587365	0.721926	0.569798	0.602178	0.782289	0.88461	0.756715	0.884932	0.512906	0.738723	0.787862	0.592252	0.797523	0.654098	0.414496	0.613249	0.856913	0.971129	0.582574	0.814174	0.872487
	3.16285	0.723407	0.71129	0.774351	0.88434	0.886219	0.977145	0.840645	0.672349	0.714427	0.642461	0.547561	0.723367	0.930507	0.610057	0.55372	0.750378	0.626309	1.00285	0.849586	0.83705	0.310105	0.828489	0.775582	0.701102	0.913532	0.798687	0.725845	0.523261	0.728431	0.550582	0.575949	0.819936	0.936492	0.779626	0.877576	0.475366	0.698351	0.809273	0.598219	0.965597	0.631581	0.41376	0.623185	0.798154	0.916693	0.568402	0.783886	0.867872
	3.1962	0.700398	0.753195	0.758768	0.850437	0.863464	0.968341	0.828813	0.697651	0.71961	0.627794	0.594748	0.718767	0.887665	0.599201	0.618154	0.741876	0.692722	1.03479	0.846924	0.783493	0.368166	0.809237	0.724136	0.683339	0.8501	0.753765	0.742833	0.583167	0.700609	0.541677	0.593048	0.820111	0.899234	0.782479	0.878746	0.499784	0.722981	0.783978	0.579551	0.949532	0.65001	0.442501	0.651819	0.842923	0.92255	0.613906	0.811011	0.797504
	3.22952	0.670369	0.694591	0.763516	0.873468	0.811709	0.930595	0.796074	0.663125	0.719439	0.623784	0.55144	0.716229	0.862931	0.591468	0.601279	0.739227	0.693923	0.963426	0.857021	0.745279	0.387033	0.877282	0.731958	0.681227	0.859426	0.702319	0.747718	0.560719	0.738081	0.533259	0.58443	0.790725	0.853362	0.755513	0.840507	0.473969	0.721313	0.775768	0.533812	1.01331	0.649817	0.416292	0.57778	0.865084	0.92718	0.568303	0.754377	0.878738
	3.26285	0.647958	0.729512	0.722745	0.752839	0.857734	0.914775	0.812933	0.681399	0.716412	0.621801	0.568216	0.712004	0.858177	0.557329	0.571473	0.714116	0.613676	0.984034	0.769798	0.75067	0.358099	0.802722	0.731336	0.653337	0.870812	0.772028	0.734262	0.548446	0.713582	0.539552	0.600891	0.80666	0.874812	0.709273	0.87766	0.509801	0.744677	0.797979	0.571467	1.0073	0.645087	0.414795	0.598365	0.786857	0.943626	0.511323	0.752536	0.824102
	3.29622	0.644436	0.730315	0.745844	0.851172	0.833482	0.897876	0.752494	0.668277	0.70306	0.58867	0.563575	0.714146	0.853412	0.582551	0.597841	0.714524	0.661086	0.944906	0.853753	0.777637	0.35009	0.822702	0.732075	0.660099	0.904156	0.691782	0.738781	0.535959	0.711079	0.52257	0.60658	0.812429	0.851934	0.757165	0.876874	0.46568	0.767653	0.779463	0.533265	1.00864	0.605197	0.397198	0.596571	0.782599	0.906116	0.528372	0.742524	0.801966
	3.32953	0.637792	0.703606	0.7704	0.840134	0.841349	0.907628	0.760654	0.673329	0.676411	0.587393	0.516738	0.689127	0.83563	0.563336	0.583436	0.714568	0.635983	0.942895	0.808839	0.781893	0.364166	0.825024	0.675362	0.65395	0.873693	0.707382	0.697593	0.533972	0.697154	0.52741	0.606695	0.781314	0.893991	0.757119	0.795867	0.497988	0.740815	0.751521	0.55569	1.02096	0.623174	0.412689	0.569398	0.777989	0.886641	0.527068	0.806263	0.830167
	3.36287	0.615288	0.716898	0.754524	0.851174	0.820895	0.906226	0.750757	0.709346	0.721874	0.569635	0.545349	0.743702	0.841989	0.556984	0.559064	0.718634	0.616625	1.01429	0.798132	0.753837	0.355312	0.761332	0.743498	0.614035	0.881597	0.72827	0.715501	0.506088	0.666019	0.50659	0.606101	0.817074	0.856437	0.797209	0.787402	0.466615	0.74851	0.793272	0.544791	1.01837	0.608751	0.397706	0.568627	0.798606	0.910613	0.53928	0.765881	0.83023
	3.3962	0.622495	0.709995	0.772959	0.79581	0.800245	0.8711	0.729728	0.692533	0.715945	0.57476	0.557565	0.650473	0.814825	0.536382	0.540797	0.685524	0.662767	0.917175	0.788973	0.706753	0.355434	0.879794	0.757989	0.652478	0.832576	0.73562	0.681971	0.548348	0.695498	0.527474	0.595169	0.780162	0.814892	0.80258	0.886651	0.468298	0.80274	0.795942	0.544732	1.05034	0.601582	0.389838	0.596387	0.724332	0.912333	0.521033	0.727974	0.822467
	3.42955	0.585004	0.709807	0.738833	0.830107	0.848379	0.922828	0.764572	0.670471	0.668344	0.569217	0.472524	0.664008	0.781695	0.548238	0.558021	0.74366	0.598905	0.957344	0.798476	0.677008	0.314319	0.809167	0.698834	0.621424	0.904726	0.732551	0.699338	0.525472	0.681411	0.531378	0.581543	0.775691	0.804704	0.788074	0.804156	0.467935	0.800817	0.716427	0.52228	0.955144	0.563969	0.400653	0.581775	0.756583	0.871398	0.487402	0.678589	0.802467
	3.46287	0.611227	0.750346	0.777517	0.830146	0.846947	0.88353	0.743021	0.657527	0.68022	0.556021	0.501716	0.715525	0.798178	0.559018	0.570829	0.713218	0.601419	0.883269	0.777067	0.690475	0.372399	0.821293	0.719976	0.633388	0.883554	0.721385	0.690114	0.550191	0.693925	0.531727	0.588247	0.817391	0.811236	0.788328	0.789741	0.463066	0.763226	0.795265	0.541133	0.952208	0.571474	0.425207	0.613887	0.788563	0.910728	0.50919	0.69243	0.81737
	3.49622	0.593374	0.671983	0.729766	0.793068	0.849091	0.87069	0.704074	0.652405	0.70069	0.562592	0.527545	0.690231	0.784128	0.537037	0.560341	0.736294	0.530594	0.916135	0.802322	0.686095	0.36211	0.866622	0.738955	0.619322	0.806569	0.734304	0.678385	0.499255	0.701348	0.491627	0.609115	0.827284	0.76105	0.744078	0.830188	0.456218	0.713952	0.775115	0.536437	0.907408	0.543072	0.397327	0.541733	0.73703	0.857631	0.500438	0.714586	0.76502
	3.52952	0.622464	0.702579	0.728975	0.800686	0.818321	0.894495	0.758192	0.683286	0.648197	0.55025	0.491647	0.621751	0.805064	0.534099	0.550334	0.70177	0.60559	0.933215	0.842424	0.69171	0.364294	0.821813	0.772697	0.633029	0.912205	0.714866	0.722625	0.537665	0.716675	0.500459	0.559952	0.778514	0.792429	0.731468	0.809183	0.47328	0.7911	0.726496	0.513894	0.982468	0.576698	0.387767	0.549852	0.719586	0.859205	0.541397	0.698674	0.811683
	3.56287	0.559301	0.645701	0.710849	0.772835	0.81889	0.84565	0.661719	0.66	0.669233	0.533636	0.44743	0.634935	0.777262	0.512369	0.523551	0.677203	0.563967	0.896509	0.775079	0.682719	0.322984	0.852944	0.704551	0.61526	0.856562	0.695523	0.662058	0.474415	0.669676	0.476598	0.575122	0.813672	0.747309	0.740804	0.746071	0.444867	0.759254	0.717594	0.489317	0.923701	0.554636	0.362365	0.517365	0.753384	0.819788	0.468648	0.69844	0.786106
	3.5962	0.54226	0.686182	0.738597	0.822904	0.815658	0.886921	0.682009	0.692239	0.661135	0.525869	0.470495	0.675255	0.771258	0.529649	0.523584	0.692814	0.596639	0.937497	0.844186	0.684851	0.313676	0.852676	0.747894	0.607463	0.83981	0.750082	0.621095	0.481115	0.698321	0.464517	0.557629	0.792469	0.735838	0.801585	0.807501	0.452101	0.805203	0.680635	0.5091	1.0242	0.57274	0.416754	0.579062	0.737177	0.8259	0.486359	0.684938	0.795315
	3.62952	0.563668	0.663226	0.691017	0.765762	0.801467	0.847593	0.6879	0.652032	0.642651	0.538729	0.473367	0.584025	0.762466	0.517523	0.497989	0.734715	0.605034	0.921223	0.783076	0.651652	0.328564	0.810597	0.706046	0.602277	0.802881	0.681422	0.684723	0.497594	0.657583	0.482782	0.581159	0.801814	0.749127	0.739741	0.790056	0.423055	0.792518	0.720442	0.502545	0.889466	0.541434	0.404587	0.505793	0.719038	0.811379	0.518696	0.66633	0.75193
	3.66288	0.543896	0.67907	0.681204	0.753227	0.850759	0.839807	0.672455	0.655865	0.661507	0.535589	0.468775	0.646122	0.740425	0.517538	0.535177	0.698788	0.551097	0.867903	0.799685	0.666167	0.329979	0.775052	0.700797	0.617001	0.770238	0.666587	0.664836	0.49849	0.671838	0.475391	0.548508	0.815773	0.747936	0.743877	0.717547	0.431595	0.793878	0.724567	0.497122	0.933564	0.531661	0.367851	0.531054	0.717329	0.783724	0.451848	0.6376	0.728584
	3.69618	0.532486	0.658535	0.656182	0.760756	0.740189	0.812772	0.650162	0.632604	0.637813	0.516814	0.472225	0.67386	0.753034	0.503791	0.478576	0.65275	0.5866	0.807941	0.769789	0.669177	0.338767	0.787858	0.701625	0.592485	0.802779	0.673169	0.691672	0.482147	0.674221	0.46068	0.560857	0.78992	0.715831	0.731935	0.708056	0.42595	0.782313	0.742392	0.509615	1.04289	0.538525	0.36753	0.53937	0.676142	0.779998	0.502235	0.664144	0.779819
	3.72958	0.541441	0.668104	0.689999	0.802535	0.773604	0.811094	0.629786	0.621002	0.621854	0.478939	0.459145	0.621076	0.701562	0.514055	0.513518	0.626069	0.56209	0.881146	0.81831	0.63398	0.364747	0.761989	0.70925	0.605173	0.778504	0.733274	0.637657	0.460632	0.662511	0.445998	0.570898	0.776329	0.692084	0.735088	0.706072	0.423494	0.771917	0.688254	0.468575	0.944663	0.518211	0.370896	0.509904	0.696033	0.752025	0.443124	0.66584	0.753117
	3.76288	0.546877	0.624608	0.693129	0.755238	0.753103	0.797314	0.634213	0.629268	0.608064	0.49445	0.427425	0.579177	0.727579	0.493019	0.513249	0.647798	0.516207	0.847539	0.761546	0.587765	0.355342	0.806428	0.705303	0.59598	0.804847	0.654888	0.676445	0.499387	0.637484	0.446602	0.551694	0.786684	0.651977	0.784242	0.720401	0.420558	0.745007	0.685894	0.453286	0.93483	0.494358	0.355706	0.537261	0.703816	0.787486	0.446689	0.686036	0.73133
	3.7962	0.551717	0.669809	0.655585	0.738678	0.725465	0.78006	0.616838	0.666045	0.590909	0.492964	0.46973	0.604792	0.672823	0.505269	0.516123	0.61868	0.58458	0.81129	0.816589	0.632511	0.331993	0.656411	0.676654	0.566716	0.808464	0.671618	0.654772	0.446587	0.667193	0.426409	0.543884	0.770938	0.686783	0.726069	0.745562	0.426235	0.726582	0.684658	0.443651	0.936338	0.464587	0.373471	0.496594	0.690459	0.71508	0.455197	0.653522	0.742773
	3.82953	0.513901	0.620754	0.65465	0.757995	0.735685	0.798213	0.621657	0.627412	0.605609	0.514975	0.437871	0.614041	0.666466	0.467956	0.517464	0.620717	0.525187	0.875585	0.763562	0.627021	0.337072	0.703959	0.67976	0.591405	0.771709	0.669722	0.625343	0.443909	0.631362	0.449594	0.543827	0.763044	0.683776	0.712477	0.723231	0.393563	0.752182	0.736042	0.444442	0.940293	0.51008	0.393381	0.516499	0.672355	0.719133	0.420803	0.603377	0.739878
	3.86285	0.51715	0.633213	0.647765	0.712324	0.738142	0.772097	0.620068	0.620348	0.610946	0.464551	0.460086	0.591342	0.691942	0.487218	0.483954	0.654961	0.533197	0.873469	0.77171	0.623035	0.334988	0.724007	0.7304	0.558527	0.814615	0.665091	0.614643	0.453826	0.655665	0.425877	0.561787	0.761605	0.639718	0.695549	0.730653	0.410192	0.737782	0.680134	0.436357	0.901013	0.501102	0.368715	0.46423	0.670547	0.696059	0.464212	0.645654	0.766236
	3.8962	0.498579	0.627276	0.644448	0.713778	0.713107	0.791667	0.598938	0.616341	0.628769	0.470513	0.439129	0.605013	0.69602	0.471791	0.510361	0.606301	0.529118	0.822903	0.734982	0.634191	0.338489	0.711785	0.665716	0.569133	0.741085	0.660843	0.603754	0.456893	0.63006	0.442659	0.54051	0.771106	0.660831	0.734891	0.730071	0.437292	0.719571	0.654864	0.444958	1.00728	0.497006	0.369911	0.468303	0.665377	0.676312	0.440486	0.670185	0.70152
	3.92952	0.517736	0.667907	0.639227	0.677469	0.796076	0.768023	0.590225	0.612828	0.587951	0.458985	0.419256	0.617964	0.65517	0.481057	0.499054	0.61391	0.520298	0.842161	0.766612	0.627948	0.353736	0.747307	0.647136	0.539255	0.768759	0.645473	0.598798	0.436243	0.674203	0.432022	0.540128	0.785723	0.678718	0.712969	0.73808	0.393441	0.694112	0.69734	0.428914	0.915857	0.477121	0.373374	0.498757	0.656421	0.645098	0.438498	0.65155	0.742898
	3.96288	0.482578	0.60052	0.659034	0.688048	0.774316	0.736362	0.596974	0.581037	0.598129	0.432761	0.464734	0.620385	0.676324	0.465344	0.51589	0.587115	0.513959	0.759986	0.757366	0.601285	0.358695	0.785345	0.651477	0.531189	0.792454	0.702856	0.619496	0.42201	0.633904	0.425869	0.531513	0.769066	0.630391	0.724447	0.745906	0.420758	0.713875	0.633018	0.423197	0.910402	0.470359	0.36959	0.499278	0.742578	0.637155	0.404783	0.58935	0.697755
	3.99622	0.486394	0.614428	0.6342	0.61832	0.706207	0.746122	0.611705	0.600676	0.587977	0.453502	0.405929	0.617487	0.673406	0.44617	0.475669	0.594994	0.536069	0.80524	0.759973	0.59927	0.37097	0.65927	0.626712	0.540613	0.752278	0.612428	0.586832	0.434688	0.654131	0.422176	0.539154	0.751075	0.620189	0.693717	0.705928	0.399791	0.706331	0.624607	0.423301	0.866838	0.446186	0.343943	0.482657	0.637699	0.619821	0.430456	0.58431	0.691813
	4.0295	0.509147	0.596266	0.636921	0.660331	0.821862	0.72194	0.618845	0.592529	0.611938	0.450138	0.429704	0.602842	0.692679	0.464234	0.527572	0.601154	0.523174	0.777179	0.725762	0.646672	0.32212	0.71601	0.67592	0.554751	0.755718	0.646175	0.581949	0.415963	0.662422	0.458696	0.532388	0.787975	0.633807	0.739044	0.722251	0.404577	0.671135	0.600408	0.437782	0.882466	0.479383	0.365293	0.488416	0.638638	0.631283	0.425285	0.607389	0.724814
	4.06287	0.480806	0.611866	0.605672	0.615388	0.703442	0.702405	0.587384	0.607963	0.570862	0.463926	0.41557	0.545702	0.673825	0.432506	0.491621	0.574294	0.52551	0.793604	0.705065	0.589483	0.327351	0.70747	0.66468	0.536992	0.700538	0.631257	0.580371	0.440555	0.632523	0.439605	0.546274	0.757122	0.598642	0.668027	0.725534	0.393983	0.677468	0.606831	0.443746	0.871803	0.462688	0.341816	0.453462	0.568656	0.615425	0.440294	0.598066	0.666709
	4.09618	0.479014	0.613901	0.592152	0.610224	0.729947	0.701424	0.570834	0.615001	0.577932	0.413608	0.425266	0.594296	0.638935	0.44154	0.487576	0.58022	0.48141	0.818305	0.712848	0.572524	0.333288	0.714876	0.664544	0.524422	0.703633	0.650417	0.612399	0.459079	0.643641	0.413709	0.547704	0.775458	0.613406	0.697516	0.685641	0.384776	0.696206	0.643287	0.416293	0.903525	0.447055	0.349493	0.469626	0.636949	0.63778	0.414254	0.585566	0.63773
	4.12953	0.483481	0.608136	0.596125	0.59455	0.710336	0.735362	0.56223	0.611741	0.548425	0.414856	0.400076	0.621716	0.660209	0.43953	0.490035	0.606739	0.490537	0.814616	0.674081	0.558452	0.351736	0.698309	0.632527	0.516897	0.701498	0.667056	0.589655	0.443802	0.654364	0.441125	0.533446	0.757828	0.597936	0.690315	0.700325	0.396572	0.689279	0.618124	0.425813	0.8368	0.441176	0.375599	0.484835	0.626855	0.597726	0.430867	0.605833	0.635706
	4.16285	0.457766	0.571745	0.594214	0.584297	0.694969	0.683254	0.537661	0.599313	0.571706	0.451576	0.407186	0.676243	0.62387	0.426299	0.477127	0.57208	0.47334	0.769568	0.700755	0.616655	0.340655	0.635552	0.682461	0.505177	0.72344	0.648531	0.585075	0.441133	0.628543	0.4166	0.54995	0.734377	0.579533	0.68708	0.687734	0.378326	0.670958	0.552486	0.40945	0.8076	0.442725	0.342913	0.476036	0.623034	0.616048	0.414766	0.62951	0.689335
	4.19618	0.472659	0.615966	0.585644	0.563575	0.748008	0.648745	0.553976	0.582352	0.547286	0.452061	0.427602	0.650231	0.635589	0.421627	0.465563	0.532534	0.504176	0.75682	0.677823	0.592724	0.334344	0.670648	0.597287	0.524539	0.679661	0.598595	0.568731	0.41746	0.626087	0.407739	0.511572	0.766062	0.602996	0.64748	0.686971	0.381496	0.637288	0.581721	0.423177	0.79979	0.456155	0.345271	0.440808	0.617767	0.549542	0.426536	0.546868	0.62326
	4.22953	0.44932	0.598807	0.592991	0.584453	0.747758	0.700795	0.531254	0.61865	0.566119	0.428728	0.416231	0.620332	0.605783	0.43519	0.467288	0.547168	0.498012	0.725723	0.680671	0.558634	0.33769	0.615374	0.637275	0.523769	0.623317	0.595828	0.608223	0.402074	0.642496	0.415911	0.521706	0.730984	0.603585	0.679491	0.692877	0.373354	0.681224	0.556335	0.399936	0.811891	0.438139	0.382165	0.469421	0.601336	0.581672	0.423439	0.597601	0.651634
	4.26288	0.473706	0.564491	0.600358	0.53906	0.725082	0.664694	0.532516	0.618168	0.553734	0.427983	0.410644	0.587073	0.604147	0.415004	0.484305	0.545951	0.464936	0.748982	0.703578	0.571693	0.358589	0.685421	0.658024	0.489152	0.679499	0.605636	0.570791	0.420086	0.632865	0.40007	0.521035	0.76736	0.591747	0.660638	0.663189	0.395286	0.650239	0.575298	0.402345	0.744879	0.4343	0.370252	0.467363	0.616002	0.567824	0.406134	0.554119	0.626033
	4.2962	0.457546	0.57198	0.575135	0.534583	0.726317	0.640268	0.534314	0.591068	0.541876	0.407728	0.368848	0.657784	0.618284	0.409809	0.436933	0.513471	0.467386	0.717163	0.711298	0.542821	0.336835	0.633265	0.583701	0.505387	0.621772	0.594932	0.548305	0.401861	0.609857	0.385688	0.506836	0.725837	0.562605	0.664294	0.644196	0.394536	0.651314	0.567683	0.413113	0.797906	0.423848	0.349259	0.421039	0.574839	0.544006	0.399202	0.566474	0.659787
	4.32955	0.453861	0.566446	0.588907	0.533525	0.659384	0.6611	0.520613	0.599361	0.554281	0.41278	0.383601	0.578485	0.602542	0.390088	0.442257	0.524426	0.456782	0.696726	0.691895	0.522069	0.301715	0.62268	0.604166	0.532546	0.670415	0.555769	0.548695	0.401452	0.626599	0.399138	0.500638	0.740575	0.595321	0.620147	0.701306	0.375518	0.638422	0.566134	0.390852	0.780182	0.434778	0.363678	0.463251	0.577281	0.54006	0.379937	0.547115	0.605085
	4.36285	0.441855	0.593102	0.575319	0.50895	0.651247	0.644328	0.516865	0.568653	0.537952	0.427337	0.413301	0.662436	0.565878	0.387586	0.433784	0.546256	0.438379	0.701552	0.659122	0.542012	0.318219	0.668882	0.600835	0.48997	0.638999	0.577763	0.517897	0.389981	0.580139	0.390097	0.492223	0.726605	0.553446	0.654409	0.655433	0.36746	0.611255	0.545558	0.384683	0.779347	0.42115	0.351	0.448386	0.542796	0.51948	0.360881	0.565338	0.655274
	4.39618	0.457578	0.556635	0.574288	0.550329	0.659446	0.64477	0.533523	0.558942	0.538832	0.41162	0.374732	0.594265	0.605704	0.411918	0.446216	0.537222	0.436504	0.703653	0.649982	0.542846	0.324326	0.621261	0.600799	0.51048	0.667186	0.569116	0.552448	0.391781	0.617715	0.386372	0.508457	0.704936	0.549525	0.648874	0.630692	0.370132	0.685978	0.532589	0.397949	0.77286	0.436472	0.352167	0.443456	0.555076	0.505759	0.387611	0.546148	0.642371
	4.4295	0.43607	0.55736	0.55959	0.508034	0.647221	0.620216	0.505095	0.581995	0.534876	0.388732	0.365714	0.563946	0.562548	0.394645	0.440529	0.567818	0.446568	0.655339	0.66666	0.53756	0.325697	0.617703	0.620034	0.493763	0.649803	0.573099	0.552292	0.369487	0.593366	0.400036	0.480182	0.69127	0.542158	0.662883	0.614501	0.370337	0.657074	0.539288	0.39342	0.749596	0.420869	0.362853	0.454126	0.598615	0.509721	0.396353	0.528189	0.595545
	4.46288	0.431814	0.575676	0.553333	0.490776	0.634283	0.622713	0.491147	0.610479	0.512231	0.412765	0.382998	0.543641	0.583141	0.403202	0.461334	0.531022	0.45025	0.669067	0.662872	0.513232	0.378152	0.546693	0.583759	0.503869	0.639802	0.612056	0.547966	0.404777	0.600797	0.383121	0.498405	0.722838	0.57018	0.6218	0.642216	0.358272	0.677945	0.527374	0.401782	0.726136	0.404153	0.365746	0.43398	0.571494	0.505687	0.380321	0.563982	0.623091
	4.4962	0.447748	0.559051	0.538117	0.514894	0.643301	0.630189	0.486966	0.564328	0.519317	0.414178	0.386462	0.572431	0.551307	0.38259	0.43364	0.536456	0.449515	0.690367	0.659127	0.541026	0.341941	0.683665	0.582598	0.480662	0.626433	0.55806	0.52061	0.392942	0.590869	0.391592	0.484433	0.667591	0.531688	0.611715	0.625511	0.364119	0.597222	0.510105	0.357955	0.680633	0.407942	0.35125	0.451963	0.494588	0.492726	0.395554	0.523875	0.62976
	4.52952	0.443665	0.559402	0.56825	0.490255	0.657095	0.617011	0.494657	0.555751	0.52547	0.385382	0.352644	0.570984	0.577929	0.3894	0.409479	0.511774	0.447093	0.657742	0.672516	0.547058	0.325402	0.620074	0.569613	0.482609	0.640819	0.565916	0.529357	0.402995	0.568996	0.400128	0.486503	0.721999	0.526801	0.596364	0.626392	0.370017	0.629315	0.499368	0.375066	0.723201	0.423438	0.361809	0.422822	0.57549	0.499007	0.427936	0.549201	0.587272
	4.56285	0.43767	0.545296	0.540001	0.511185	0.642354	0.59806	0.490661	0.565763	0.517651	0.394752	0.347731	0.53371	0.564628	0.385822	0.419428	0.50549	0.459222	0.684854	0.647786	0.5075	0.319544	0.639687	0.590637	0.456517	0.643337	0.584273	0.517065	0.383969	0.596553	0.399882	0.474111	0.726964	0.526808	0.577338	0.62878	0.362598	0.636943	0.511066	0.372548	0.693054	0.407596	0.324761	0.414226	0.53679	0.504427	0.364939	0.505946	0.591097
	4.5962	0.419545	0.550969	0.535265	0.496698	0.61076	0.628568	0.525754	0.556062	0.523334	0.407865	0.391117	0.530763	0.553587	0.375	0.400393	0.498948	0.420682	0.654168	0.599795	0.504678	0.366148	0.663439	0.530169	0.472609	0.631991	0.57544	0.504465	0.386639	0.577125	0.386286	0.482199	0.717331	0.511919	0.575205	0.606984	0.358765	0.60354	0.53588	0.370663	0.697654	0.419102	0.311678	0.42563	0.530755	0.480247	0.384817	0.521575	0.589512
	4.62953	0.432632	0.527918	0.529912	0.486504	0.648421	0.573017	0.506602	0.534166	0.504122	0.398042	0.344256	0.476705	0.535863	0.395784	0.410622	0.497731	0.422641	0.677248	0.629363	0.501828	0.317913	0.632357	0.535785	0.462061	0.594905	0.57807	0.491652	0.400171	0.592381	0.388441	0.466877	0.707627	0.514948	0.630793	0.613485	0.352662	0.573941	0.51558	0.379897	0.744664	0.392313	0.349155	0.427428	0.503843	0.456044	0.363604	0.549706	0.614323
	4.66287	0.449502	0.525502	0.520278	0.472762	0.59853	0.574273	0.491302	0.560104	0.513584	0.376875	0.370762	0.502008	0.544996	0.366465	0.40429	0.485738	0.447904	0.623141	0.598069	0.50691	0.330389	0.595952	0.584	0.46243	0.575094	0.528604	0.506479	0.380554	0.545612	0.3776	0.502309	0.702099	0.509792	0.607175	0.58373	0.371929	0.61576	0.515112	0.367262	0.695777	0.3709	0.353771	0.424171	0.526315	0.469485	0.37291	0.497145	0.55023
	4.69622	0.426511	0.567772	0.513609	0.463386	0.609038	0.606962	0.489762	0.565669	0.478271	0.380137	0.365772	0.520248	0.542207	0.372341	0.400407	0.480575	0.423511	0.608711	0.62221	0.514265	0.356917	0.571251	0.525889	0.460349	0.61144	0.573924	0.510174	0.388875	0.55979	0.369812	0.486962	0.6924	0.508702	0.566862	0.563875	0.326707	0.617941	0.489576	0.353785	0.691307	0.385797	0.346473	0.422638	0.521411	0.459453	0.36141	0.504111	0.563084
	4.72953	0.429177	0.558551	0.526195	0.484877	0.593403	0.594044	0.495646	0.558636	0.501268	0.379673	0.363975	0.484157	0.514693	0.371595	0.392315	0.511746	0.446895	0.604406	0.62693	0.472655	0.364395	0.608231	0.551195	0.479375	0.532967	0.52682	0.497542	0.368933	0.564417	0.394521	0.483041	0.681179	0.478401	0.599435	0.558615	0.336113	0.644409	0.488954	0.357213	0.689154	0.381926	0.351348	0.411084	0.544139	0.465089	0.34589	0.521775	0.58641
	4.76287	0.429977	0.529895	0.534724	0.471211	0.619856	0.549201	0.477143	0.577654	0.498904	0.381984	0.362935	0.489732	0.539707	0.37323	0.413146	0.517331	0.423842	0.62152	0.624233	0.499607	0.324707	0.636847	0.534908	0.467553	0.564485	0.515727	0.50352	0.408895	0.570287	0.376495	0.470739	0.6612	0.494377	0.562228	0.583105	0.363028	0.57076	0.466131	0.375385	0.710268	0.376615	0.354252	0.425556	0.469948	0.468417	0.374465	0.519531	0.564748
	4.7962	0.439478	0.52561	0.506763	0.448594	0.609861	0.571686	0.464394	0.579341	0.489432	0.379681	0.348773	0.494824	0.539402	0.373339	0.415742	0.50367	0.410825	0.597429	0.642065	0.51279	0.359893	0.568256	0.499655	0.456598	0.63755	0.544238	0.479042	0.383475	0.557232	0.383858	0.472581	0.663646	0.478575	0.580671	0.547889	0.342703	0.612049	0.492815	0.357275	0.635879	0.385472	0.364336	0.419226	0.498587	0.451953	0.387001	0.478952	0.530067
	4.82952	0.436312	0.540465	0.504347	0.460254	0.616342	0.555882	0.435329	0.541403	0.487509	0.353088	0.368273	0.467537	0.51283	0.365082	0.433497	0.514145	0.430186	0.590758	0.620833	0.465835	0.344766	0.558561	0.545806	0.468647	0.587999	0.494867	0.466798	0.391961	0.570045	0.397984	0.475575	0.622404	0.468735	0.578511	0.551014	0.342582	0.596415	0.479177	0.393306	0.666312	0.382831	0.331167	0.398934	0.510628	0.454806	0.356976	0.508912	0.561953
	4.86283	0.426753	0.531238	0.514229	0.448899	0.557059	0.572249	0.465297	0.576075	0.483515	0.360166	0.348731	0.502515	0.519971	0.375609	0.415709	0.492536	0.410866	0.606559	0.61376	0.492803	0.348218	0.555273	0.554766	0.471535	0.59496	0.52165	0.498909	0.374883	0.558188	0.386261	0.494107	0.649205	0.479801	0.599469	0.595046	0.363599	0.560992	0.443692	0.371107	0.682552	0.402878	0.345918	0.422756	0.52636	0.433167	0.368815	0.474812	0.53841
	4.89617	0.435261	0.521829	0.516155	0.456608	0.60248	0.557378	0.413616	0.54067	0.491188	0.372786	0.373121	0.483245	0.518243	0.384021	0.435761	0.482947	0.420942	0.603004	0.626139	0.47392	0.322637	0.569418	0.53448	0.442528	0.559389	0.507378	0.475453	0.407491	0.570324	0.385543	0.483812	0.650226	0.482996	0.552013	0.57265	0.370662	0.572782	0.481644	0.362651	0.648658	0.376861	0.340265	0.417824	0.515096	0.447883	0.348481	0.485512	0.526133
	4.9295	0.428371	0.525022	0.486356	0.441326	0.580886	0.540818	0.43523	0.538909	0.456094	0.384044	0.341791	0.507381	0.517254	0.368158	0.389517	0.480054	0.411518	0.592941	0.605935	0.479915	0.327081	0.599729	0.513096	0.468107	0.531864	0.498807	0.465636	0.363305	0.556437	0.397269	0.475998	0.656558	0.466564	0.57632	0.523039	0.356899	0.562995	0.465535	0.350064	0.711168	0.376479	0.323234	0.4257	0.522613	0.45583	0.34103	0.489887	0.546375
	4.96287	0.403128	0.518219	0.494394	0.429067	0.601798	0.541169	0.457615	0.546302	0.453289	0.377369	0.368351	0.495339	0.499534	0.362129	0.404045	0.476655	0.399829	0.553079	0.614865	0.490379	0.3528	0.529556	0.517337	0.451641	0.560076	0.500353	0.453837	0.376142	0.563258	0.376564	0.461087	0.641306	0.464654	0.542668	0.513648	0.366939	0.542569	0.482668	0.361095	0.702099	0.36986	0.331312	0.381797	0.46135	0.451751	0.360323	0.469995	0.545689
	4.9962	0.422336	0.492045	0.501579	0.435558	0.574869	0.546814	0.445456	0.524247	0.44598	0.382315	0.349156	0.480314	0.505061	0.362645	0.421876	0.509055	0.400536	0.567324	0.588374	0.49353	0.320992	0.607155	0.521002	0.467184	0.526954	0.491133	0.450313	0.37635	0.525569	0.382436	0.47084	0.642422	0.45892	0.544861	0.521862	0.325745	0.588474	0.418217	0.372468	0.645383	0.376302	0.32962	0.389212	0.465944	0.418483	0.386607	0.463475	0.542358
	5.02952	0.407331	0.541268	0.494638	0.443921	0.589629	0.521808	0.441469	0.514653	0.450056	0.363535	0.343369	0.476456	0.509274	0.348005	0.412147	0.465085	0.407483	0.587229	0.62782	0.499813	0.346992	0.56603	0.49974	0.458574	0.545844	0.492449	0.421844	0.388399	0.529468	0.375905	0.466071	0.623169	0.451348	0.549047	0.553928	0.33531	0.530087	0.467604	0.379746	0.618281	0.347982	0.331686	0.409144	0.463744	0.427795	0.352143	0.460801	0.527629
	5.06282	0.421645	0.53225	0.489576	0.431325	0.583275	0.560959	0.440456	0.522513	0.470912	0.385541	0.35578	0.480761	0.494578	0.360564	0.399631	0.454018	0.42154	0.563533	0.582792	0.464751	0.328154	0.502218	0.472886	0.446354	0.541666	0.470292	0.4265	0.368178	0.531339	0.356195	0.467727	0.610887	0.449489	0.544261	0.486448	0.370579	0.559117	0.424688	0.37647	0.618608	0.359358	0.364508	0.389021	0.489593	0.44826	0.353321	0.459242	0.533193
	5.09617	0.403658	0.525731	0.4851	0.420483	0.580751	0.532842	0.472863	0.529891	0.438373	0.371346	0.373376	0.487647	0.474919	0.371528	0.390002	0.446187	0.369322	0.549322	0.615552	0.479639	0.323353	0.492671	0.473084	0.442304	0.517822	0.487066	0.471047	0.398206	0.523923	0.35509	0.439417	0.626959	0.447622	0.546606	0.508052	0.353634	0.529227	0.436911	0.390929	0.628996	0.364133	0.351098	0.390358	0.473829	0.435567	0.355802	0.454784	0.547938
	5.12952	0.412395	0.467758	0.468351	0.391246	0.53249	0.501464	0.45959	0.520378	0.45648	0.353116	0.3605	0.453248	0.457773	0.33941	0.389566	0.45277	0.370768	0.529383	0.538978	0.468347	0.361899	0.528694	0.487845	0.442902	0.521877	0.499459	0.443991	0.384275	0.530222	0.354743	0.463218	0.575725	0.429922	0.526962	0.518543	0.3743	0.53649	0.4523	0.351983	0.566296	0.327121	0.334211	0.41883	0.48576	0.427593	0.372012	0.46509	0.527525
	5.16285	0.412041	0.494211	0.471315	0.413754	0.546607	0.554036	0.428366	0.523548	0.447813	0.354897	0.351885	0.45344	0.47129	0.366923	0.395671	0.462546	0.403611	0.53828	0.588866	0.473991	0.309565	0.528	0.475005	0.462985	0.519585	0.493596	0.435224	0.345876	0.501537	0.37807	0.425039	0.622416	0.451867	0.525622	0.53847	0.346564	0.557672	0.42301	0.3491	0.645584	0.366146	0.354315	0.438218	0.481399	0.428056	0.365613	0.478038	0.507146
	5.19618	0.408748	0.512491	0.483511	0.387598	0.534562	0.535169	0.440667	0.540664	0.458663	0.367353	0.361788	0.454854	0.47458	0.361898	0.369611	0.457023	0.365842	0.510793	0.575207	0.466979	0.335723	0.537147	0.47679	0.456971	0.542471	0.460725	0.417336	0.362524	0.515275	0.37358	0.455452	0.594276	0.432305	0.542162	0.536609	0.368383	0.55811	0.427524	0.360611	0.594607	0.353382	0.343628	0.4108	0.471383	0.399711	0.337161	0.466638	0.50874
	5.2295	0.399098	0.496577	0.458581	0.387471	0.543849	0.51959	0.429586	0.536212	0.432688	0.357044	0.358702	0.465771	0.466134	0.360837	0.379119	0.445911	0.347343	0.542082	0.583293	0.4673	0.360717	0.532307	0.45233	0.467129	0.512595	0.50281	0.418699	0.352249	0.510475	0.367541	0.460323	0.609648	0.401117	0.537465	0.476421	0.336488	0.485092	0.459695	0.338844	0.618569	0.385015	0.345663	0.391947	0.459861	0.420525	0.326136	0.46647	0.493424
	5.2628	0.424561	0.502731	0.473716	0.4031	0.553572	0.503331	0.412653	0.536442	0.467228	0.363995	0.347567	0.427236	0.462267	0.357037	0.381208	0.454267	0.39649	0.543824	0.563539	0.448374	0.367261	0.484524	0.479616	0.438961	0.556981	0.480505	0.438058	0.364039	0.496855	0.368014	0.450013	0.598037	0.44867	0.53818	0.533753	0.349371	0.53232	0.438444	0.361935	0.633245	0.363749	0.362019	0.404409	0.452479	0.424934	0.386456	0.463943	0.483944
	5.29618	0.413191	0.4998	0.459134	0.399199	0.519681	0.503538	0.419416	0.526259	0.452335	0.355646	0.36308	0.40801	0.448548	0.357227	0.399108	0.433688	0.38116	0.517294	0.542735	0.437074	0.330828	0.486163	0.450807	0.448931	0.521383	0.45911	0.416826	0.352979	0.498698	0.365379	0.425885	0.568593	0.41175	0.5042	0.505235	0.343405	0.536197	0.414922	0.366492	0.65422	0.361891	0.359201	0.391508	0.472825	0.405283	0.346914	0.418233	0.522526
	5.32953	0.39226	0.51208	0.458542	0.388691	0.546173	0.508754	0.411838	0.529126	0.448169	0.374808	0.323036	0.444863	0.45626	0.354852	0.391238	0.431197	0.36982	0.522695	0.569646	0.437325	0.317322	0.458826	0.457757	0.427333	0.495854	0.445708	0.412007	0.367068	0.486428	0.373052	0.472327	0.553558	0.410075	0.54613	0.492487	0.354207	0.529911	0.43515	0.388558	0.591408	0.341853	0.319038	0.379861	0.42765	0.393418	0.359466	0.454067	0.49624
	5.36288	0.429256	0.468881	0.435652	0.374994	0.544737	0.482432	0.402691	0.519717	0.427583	0.357438	0.348829	0.392984	0.46536	0.345022	0.378627	0.413215	0.359352	0.511752	0.526068	0.440496	0.314021	0.524835	0.433468	0.429955	0.48159	0.461679	0.428245	0.363115	0.504756	0.367644	0.453681	0.55743	0.389336	0.51032	0.485468	0.325219	0.537459	0.411744	0.34012	0.629975	0.35372	0.34112	0.37317	0.431466	0.396645	0.367694	0.441542	0.510688
	5.39618	0.402948	0.460468	0.453369	0.38988	0.563432	0.483312	0.435682	0.516947	0.4285	0.337701	0.332872	0.423848	0.444516	0.34892	0.383406	0.438416	0.351134	0.498803	0.564269	0.459693	0.361323	0.520582	0.484196	0.422813	0.47145	0.425097	0.406116	0.363089	0.488308	0.351502	0.436389	0.559088	0.410825	0.5039	0.50221	0.35259	0.523076	0.39142	0.341222	0.609188	0.357915	0.348695	0.384083	0.435851	0.419726	0.352174	0.401217	0.495187
	5.42953	0.416363	0.47245	0.475542	0.399468	0.513545	0.501528	0.424678	0.499957	0.433715	0.343009	0.335204	0.381446	0.444745	0.354073	0.376555	0.43116	0.34816	0.489705	0.536086	0.438481	0.319625	0.453169	0.419593	0.417749	0.506279	0.491286	0.428399	0.361464	0.482814	0.360977	0.450523	0.560153	0.39918	0.49094	0.519049	0.337659	0.507775	0.396112	0.347418	0.609539	0.348552	0.318394	0.430811	0.440283	0.398913	0.373872	0.394878	0.469626
	5.46287	0.392609	0.493271	0.470191	0.375178	0.485627	0.491665	0.390579	0.509575	0.438409	0.322976	0.357272	0.420509	0.45523	0.347402	0.387612	0.410988	0.364824	0.489836	0.554853	0.431619	0.328783	0.496532	0.434084	0.433237	0.483274	0.442845	0.407534	0.364332	0.491937	0.370812	0.427631	0.568204	0.38314	0.479225	0.517265	0.324911	0.509111	0.384688	0.36994	0.596516	0.342512	0.358597	0.380175	0.431643	0.383092	0.357541	0.412587	0.47213
	5.49622	0.396624	0.481779	0.449723	0.379697	0.492353	0.484683	0.390883	0.498866	0.444661	0.350865	0.341608	0.402124	0.438951	0.320635	0.348997	0.41254	0.365736	0.463024	0.55714	0.434655	0.337191	0.470042	0.43842	0.420953	0.482078	0.46842	0.394453	0.365272	0.495219	0.350597	0.446243	0.537782	0.414747	0.478817	0.496266	0.322565	0.511286	0.389773	0.335205	0.610001	0.346548	0.328707	0.377893	0.403976	0.38067	0.361596	0.398186	0.508835
	5.52952	0.394234	0.506506	0.458755	0.380389	0.512388	0.485702	0.411756	0.499952	0.432761	0.35033	0.34216	0.40669	0.449932	0.343811	0.384176	0.422021	0.36918	0.503717	0.530557	0.440339	0.339312	0.471175	0.429407	0.422468	0.502993	0.442388	0.419376	0.360126	0.484398	0.357963	0.404712	0.564862	0.400288	0.492907	0.536601	0.338616	0.509479	0.408792	0.356437	0.546851	0.344917	0.368278	0.37985	0.443465	0.405835	0.339231	0.417428	0.472999
	5.56287	0.397719	0.472161	0.45659	0.378246	0.484625	0.489804	0.397253	0.508775	0.422312	0.342363	0.356391	0.388381	0.47427	0.33588	0.371431	0.443042	0.352858	0.451505	0.519925	0.413093	0.33475	0.460463	0.443199	0.430094	0.519005	0.443038	0.396742	0.364887	0.476421	0.367803	0.43359	0.567285	0.39708	0.499024	0.547032	0.334742	0.503209	0.395927	0.354221	0.575845	0.34036	0.35693	0.379483	0.431834	0.396778	0.316787	0.396747	0.469777
	5.5962	0.391099	0.477808	0.452743	0.380396	0.4926	0.492514	0.388544	0.527696	0.434748	0.329547	0.344964	0.381105	0.457431	0.332954	0.380926	0.430012	0.355017	0.47052	0.559685	0.435154	0.370399	0.515333	0.476034	0.440186	0.474618	0.430815	0.371455	0.375674	0.487441	0.352672	0.427169	0.532845	0.402182	0.472882	0.540996	0.320087	0.478682	0.404853	0.333668	0.575435	0.332011	0.351563	0.381065	0.420458	0.397372	0.364274	0.401475	0.475165
	5.62953	0.414775	0.481683	0.45424	0.345228	0.509298	0.450695	0.410917	0.488506	0.429847	0.32821	0.335899	0.388567	0.437055	0.324616	0.354663	0.411921	0.368198	0.473743	0.542585	0.43021	0.353949	0.471424	0.419886	0.409413	0.450609	0.434425	0.398381	0.367496	0.456738	0.359682	0.436641	0.528425	0.386434	0.479518	0.499699	0.328539	0.484497	0.394824	0.341787	0.538988	0.339693	0.349684	0.374071	0.423057	0.37159	0.386497	0.379468	0.479059
	5.66287	0.389447	0.489467	0.443428	0.365413	0.481884	0.480142	0.422227	0.478747	0.438689	0.346185	0.312753	0.402144	0.444367	0.338145	0.3538	0.434048	0.334186	0.481612	0.506509	0.431889	0.368227	0.467213	0.439575	0.406907	0.474103	0.462537	0.410855	0.348691	0.477495	0.380803	0.42373	0.522868	0.393548	0.484711	0.49602	0.347995	0.462546	0.395629	0.354523	0.561853	0.349191	0.365285	0.371894	0.416818	0.385173	0.350587	0.411971	0.468926
	5.69618	0.381182	0.485584	0.431561	0.346477	0.483521	0.475285	0.411293	0.502852	0.438151	0.335431	0.330951	0.36244	0.428289	0.337252	0.36961	0.406669	0.344751	0.462262	0.512964	0.412394	0.375195	0.492518	0.440071	0.410892	0.448661	0.416863	0.38266	0.34618	0.468176	0.348009	0.429729	0.537652	0.371711	0.466402	0.506381	0.351331	0.470392	0.403184	0.33308	0.567067	0.345386	0.335262	0.376669	0.39518	0.381288	0.346752	0.410552	0.461952
	5.72953	0.408421	0.455158	0.442646	0.359089	0.496355	0.465686	0.388765	0.484589	0.416322	0.354107	0.320189	0.413022	0.430629	0.344863	0.363631	0.417573	0.357494	0.479404	0.51807	0.432029	0.323271	0.464986	0.447192	0.405462	0.456584	0.436619	0.353017	0.365651	0.462803	0.32914	0.388368	0.52826	0.38224	0.463916	0.523363	0.317387	0.485593	0.385891	0.337142	0.550941	0.343218	0.3599	0.370677	0.42864	0.344342	0.356024	0.400162	0.463024
	5.7629	0.40893	0.483382	0.456717	0.352741	0.485434	0.470054	0.377835	0.508306	0.412278	0.352453	0.354948	0.369212	0.44845	0.350447	0.351236	0.40141	0.378955	0.45721	0.51685	0.463506	0.330191	0.439232	0.42903	0.418722	0.470042	0.414775	0.391034	0.348252	0.468334	0.361434	0.435092	0.528295	0.373945	0.473442	0.453932	0.334441	0.498216	0.38066	0.356413	0.55847	0.32778	0.320011	0.343752	0.431661	0.362186	0.365779	0.40528	0.457165
	5.79622	0.378954	0.490497	0.427554	0.356632	0.472015	0.484018	0.384655	0.487743	0.406173	0.346048	0.335857	0.359928	0.409854	0.340466	0.370531	0.414027	0.34541	0.443664	0.564908	0.406019	0.309581	0.412724	0.422155	0.422354	0.446429	0.431968	0.35649	0.379921	0.462967	0.358681	0.423825	0.538933	0.376915	0.45757	0.485903	0.305891	0.476192	0.351572	0.331206	0.582897	0.34607	0.361058	0.390269	0.412616	0.350109	0.334486	0.39056	0.426846
	5.82952	0.390147	0.45749	0.456894	0.365597	0.470824	0.455354	0.372797	0.50209	0.421254	0.327971	0.347588	0.363249	0.42506	0.337768	0.375679	0.424663	0.352851	0.450241	0.527879	0.424056	0.305359	0.481334	0.427129	0.402854	0.44213	0.432016	0.377279	0.339333	0.460593	0.358679	0.434014	0.513475	0.357665	0.494435	0.478691	0.31276	0.469246	0.408946	0.331799	0.576246	0.345173	0.327623	0.367436	0.393502	0.361465	0.330296	0.376824	0.445081
	5.86287	0.388878	0.465175	0.42811	0.357873	0.470074	0.478328	0.37854	0.496474	0.415761	0.34145	0.329697	0.340863	0.41381	0.341658	0.352122	0.416208	0.344755	0.443041	0.506361	0.42141	0.330625	0.464066	0.398949	0.412172	0.436263	0.41105	0.378905	0.339558	0.482152	0.35599	0.418563	0.533306	0.375832	0.461001	0.484303	0.323805	0.470924	0.36632	0.369885	0.556442	0.332291	0.364539	0.360188	0.390239	0.371488	0.363559	0.404355	0.421164
	5.89617	0.404594	0.484596	0.411564	0.360895	0.493248	0.468146	0.380923	0.473679	0.40731	0.324984	0.321582	0.372287	0.413919	0.323323	0.342512	0.427079	0.355877	0.425736	0.497214	0.41083	0.356164	0.474377	0.395211	0.398973	0.431638	0.432789	0.382972	0.336434	0.452849	0.349788	0.410311	0.539808	0.381341	0.453913	0.471321	0.343016	0.463183	0.383784	0.348731	0.523884	0.344661	0.368166	0.393144	0.378552	0.365005	0.351512	0.377504	0.453208
	5.92955	0.380556	0.470648	0.429808	0.355193	0.459648	0.472378	0.387473	0.459338	0.402916	0.358212	0.335706	0.359674	0.421801	0.326731	0.329935	0.407914	0.344877	0.457896	0.510982	0.408845	0.365649	0.482865	0.429077	0.395718	0.448753	0.416391	0.377728	0.351327	0.44172	0.340627	0.402048	0.529712	0.370834	0.443052	0.440786	0.329957	0.473578	0.369395	0.361948	0.605389	0.329563	0.366191	0.375966	0.441149	0.364934	0.331986	0.403837	0.458458
	5.96282	0.390638	0.451044	0.427086	0.351958	0.476555	0.457655	0.389904	0.441632	0.405841	0.373757	0.334634	0.355384	0.411504	0.329602	0.340146	0.392229	0.334548	0.473051	0.450693	0.415389	0.371149	0.492825	0.413442	0.391781	0.43055	0.41249	0.369076	0.330706	0.446958	0.348073	0.413812	0.509367	0.365875	0.46342	0.492665	0.324331	0.470603	0.359574	0.352146	0.568175	0.335038	0.339897	0.375528	0.365524	0.361599	0.354463	0.37202	0.444068
	5.99618	0.387542	0.463091	0.426505	0.337971	0.470039	0.431826	0.388848	0.482527	0.413724	0.348321	0.34229	0.358747	0.412378	0.333408	0.335613	0.396354	0.360306	0.463186	0.494495	0.409324	0.33833	0.45259	0.409418	0.418114	0.466469	0.421485	0.368523	0.344184	0.434087	0.342653	0.393339	0.486421	0.350947	0.475634	0.439173	0.315923	0.467004	0.353678	0.344011	0.563755	0.32401	0.36325	0.364143	0.395747	0.351672	0.357195	0.389442	0.443176
	6.0295	0.398926	0.458063	0.41868	0.351879	0.467751	0.459058	0.372441	0.452114	0.399744	0.344088	0.33668	0.349726	0.418122	0.336555	0.361521	0.416115	0.373789	0.456257	0.509979	0.401973	0.332543	0.439501	0.402768	0.407638	0.438533	0.393654	0.371586	0.347095	0.452047	0.35976	0.399078	0.493991	0.357971	0.466659	0.446112	0.335107	0.451905	0.366753	0.338826	0.543376	0.342407	0.369852	0.382517	0.393404	0.341898	0.376717	0.390015	0.472587
	6.06285	0.393334	0.436527	0.426434	0.330511	0.447005	0.46909	0.372547	0.469863	0.417678	0.337173	0.356757	0.360865	0.398034	0.32881	0.332954	0.384009	0.353771	0.413622	0.505271	0.428864	0.355496	0.414002	0.396902	0.406636	0.405753	0.423236	0.351512	0.337462	0.454938	0.341707	0.402424	0.509447	0.365205	0.447904	0.432259	0.32907	0.45399	0.361309	0.355264	0.566174	0.350201	0.322295	0.367317	0.398683	0.367761	0.348708	0.392545	0.439796
	6.09618	0.391201	0.446699	0.395626	0.337259	0.473793	0.45004	0.389373	0.451959	0.412976	0.341116	0.317944	0.378312	0.409628	0.334221	0.348959	0.392679	0.347494	0.44751	0.458889	0.412185	0.318822	0.441259	0.385964	0.38377	0.417078	0.409866	0.374365	0.314864	0.445012	0.348122	0.388691	0.486309	0.347811	0.446732	0.450505	0.324035	0.430536	0.368576	0.352186	0.516669	0.334644	0.366529	0.361494	0.399434	0.353503	0.361313	0.402047	0.444655
	6.12952	0.385715	0.46797	0.408969	0.342622	0.444959	0.453358	0.365216	0.427794	0.394308	0.361692	0.330737	0.358413	0.415205	0.33805	0.354034	0.390299	0.318339	0.444656	0.480812	0.408966	0.385291	0.422267	0.39742	0.405581	0.401646	0.389914	0.356026	0.349361	0.442112	0.349194	0.377462	0.496133	0.359699	0.442188	0.433553	0.314195	0.445219	0.343693	0.345116	0.52825	0.334459	0.328797	0.367654	0.38672	0.361488	0.362572	0.380823	0.449309
	6.16287	0.395872	0.442745	0.398704	0.337766	0.451486	0.447568	0.377993	0.439595	0.401986	0.340168	0.338835	0.362974	0.409661	0.334469	0.344025	0.401918	0.344092	0.451737	0.480179	0.412046	0.33814	0.438318	0.41416	0.387909	0.430988	0.407167	0.365335	0.337312	0.432827	0.3443	0.377826	0.505834	0.343644	0.444821	0.435465	0.328906	0.450653	0.360911	0.330318	0.517977	0.326678	0.326628	0.380152	0.358789	0.361304	0.374121	0.360767	0.440456
	6.19618	0.394413	0.441459	0.413377	0.335194	0.439811	0.438122	0.3642	0.431167	0.398198	0.34705	0.326339	0.363225	0.394744	0.337072	0.35814	0.397901	0.368518	0.421388	0.48076	0.409847	0.330583	0.460341	0.357743	0.401954	0.414362	0.391019	0.354	0.325511	0.451182	0.356118	0.381906	0.493844	0.354431	0.458049	0.400219	0.324353	0.436285	0.392366	0.351647	0.544322	0.325711	0.369847	0.366482	0.420897	0.338618	0.332645	0.381092	0.44633
	6.22953	0.388446	0.445939	0.408602	0.320915	0.42194	0.438397	0.352789	0.429709	0.394096	0.32863	0.32179	0.361175	0.384144	0.337906	0.340282	0.403468	0.343741	0.426964	0.445059	0.428763	0.34837	0.390334	0.368651	0.396421	0.390536	0.396639	0.364196	0.346897	0.423245	0.345658	0.392666	0.503645	0.353138	0.449194	0.434842	0.307111	0.458295	0.377272	0.329568	0.536957	0.329221	0.314585	0.367217	0.373888	0.34507	0.32837	0.376022	0.443361
	6.26285	0.369299	0.436802	0.383331	0.333965	0.432181	0.440082	0.352706	0.435802	0.401144	0.345712	0.327888	0.377762	0.387941	0.318277	0.349986	0.40678	0.341284	0.433562	0.447287	0.416451	0.341694	0.414283	0.36942	0.409011	0.423095	0.384901	0.360936	0.340641	0.434673	0.327499	0.360435	0.479327	0.367569	0.447641	0.440447	0.335214	0.43969	0.371749	0.339006	0.539543	0.326618	0.351762	0.352827	0.390012	0.353598	0.340963	0.353746	0.408974
	6.29618	0.385156	0.461525	0.387489	0.341665	0.433475	0.447102	0.350532	0.424562	0.384843	0.341964	0.326017	0.338041	0.384735	0.355001	0.334637	0.387369	0.332917	0.403239	0.482747	0.407416	0.328594	0.430511	0.394943	0.381566	0.390878	0.392709	0.34556	0.338383	0.430581	0.361327	0.383032	0.459136	0.34935	0.439081	0.443809	0.316799	0.424293	0.338609	0.337412	0.545796	0.324325	0.353858	0.402619	0.394941	0.354314	0.349234	0.375755	0.454047
	6.32952	0.379418	0.448827	0.401336	0.322844	0.422561	0.43339	0.393983	0.428731	0.388632	0.353743	0.338268	0.377205	0.389237	0.343131	0.321089	0.379658	0.333542	0.431038	0.481324	0.416404	0.361841	0.403894	0.367984	0.404382	0.421986	0.385093	0.365552	0.344051	0.433649	0.331663	0.407173	0.486963	0.34997	0.43585	0.421246	0.31376	0.432804	0.385435	0.355469	0.56269	0.332545	0.355278	0.392108	0.388436	0.349246	0.339249	0.383297	0.420141
	6.36285	0.383503	0.43774	0.394655	0.353499	0.422181	0.42321	0.343208	0.440208	0.378562	0.313971	0.329968	0.375468	0.406096	0.323661	0.32808	0.382317	0.350268	0.404034	0.474509	0.403813	0.3215	0.440026	0.359652	0.380684	0.402997	0.388973	0.356236	0.348302	0.429747	0.343041	0.388637	0.468012	0.344431	0.431275	0.397415	0.326322	0.41791	0.358951	0.341281	0.526839	0.334187	0.347826	0.379306	0.342334	0.340854	0.364948	0.384269	0.430253
	6.39618	0.385024	0.418048	0.393458	0.346915	0.427025	0.421742	0.339992	0.409339	0.370499	0.350757	0.298891	0.361202	0.389924	0.334147	0.337582	0.388825	0.330562	0.415328	0.459425	0.410322	0.370506	0.393253	0.371804	0.383358	0.381251	0.384217	0.37008	0.35121	0.441779	0.352602	0.382452	0.480081	0.337267	0.442322	0.395575	0.32715	0.458965	0.36731	0.34047	0.509563	0.325384	0.334745	0.373259	0.356645	0.364093	0.33039	0.354131	0.418048
	6.42955	0.38668	0.447672	0.391289	0.348238	0.400058	0.440244	0.367776	0.43963	0.383085	0.331695	0.349019	0.342471	0.38674	0.343499	0.336832	0.403503	0.335972	0.412274	0.434068	0.414501	0.365771	0.382101	0.382586	0.400759	0.407541	0.383532	0.3545	0.352956	0.441491	0.361454	0.388054	0.472227	0.34579	0.444131	0.442919	0.345512	0.414458	0.335488	0.33794	0.51072	0.300434	0.349425	0.36232	0.399409	0.344294	0.323888	0.394979	0.447339
	6.46285	0.370917	0.419741	0.388132	0.339392	0.443612	0.415159	0.375754	0.419059	0.380555	0.34754	0.344789	0.333473	0.399076	0.334937	0.326435	0.380349	0.351504	0.378617	0.439216	0.406975	0.355773	0.421773	0.36848	0.379772	0.37277	0.390239	0.367861	0.337198	0.439862	0.348169	0.392834	0.480948	0.346305	0.41372	0.421099	0.302587	0.402968	0.352448	0.343239	0.476828	0.312596	0.352313	0.375913	0.370755	0.34141	0.338705	0.353428	0.41531
	6.49622	0.382048	0.424572	0.377514	0.33468	0.408277	0.414756	0.349681	0.417847	0.38809	0.32791	0.351783	0.350136	0.394317	0.325747	0.323162	0.389814	0.347672	0.385782	0.428552	0.371647	0.327733	0.387617	0.369067	0.381975	0.398327	0.387824	0.34698	0.306901	0.420359	0.338832	0.381675	0.455111	0.337639	0.386734	0.408703	0.342375	0.398172	0.342263	0.313607	0.475615	0.322678	0.367766	0.368349	0.400771	0.328746	0.34097	0.364636	0.432721
	6.52953	0.370743	0.436512	0.374935	0.333928	0.410665	0.429556	0.355805	0.425174	0.364362	0.327395	0.321822	0.347419	0.392461	0.33876	0.343266	0.363902	0.356146	0.385306	0.457379	0.382411	0.319472	0.40722	0.350963	0.379985	0.383019	0.392994	0.349324	0.34225	0.417549	0.349151	0.378807	0.438807	0.341626	0.412702	0.414809	0.314529	0.402693	0.32814	0.343827	0.484633	0.322375	0.324138	0.357189	0.366673	0.34845	0.347276	0.348683	0.429698
	6.56288	0.364897	0.432875	0.367958	0.331735	0.390891	0.40359	0.343069	0.428165	0.378089	0.314491	0.32184	0.351678	0.390757	0.327622	0.332007	0.379899	0.356395	0.396805	0.434141	0.37127	0.325772	0.399186	0.353007	0.384789	0.401053	0.369176	0.35693	0.349256	0.435284	0.343086	0.389405	0.454395	0.32862	0.410288	0.384379	0.310359	0.412034	0.344554	0.358727	0.521968	0.316098	0.347778	0.350931	0.372774	0.341757	0.364668	0.358269	0.419189
	6.59618	0.371482	0.426143	0.365499	0.328601	0.436323	0.410108	0.343537	0.414347	0.377313	0.343154	0.328157	0.33357	0.394686	0.340227	0.344645	0.377376	0.354103	0.372239	0.422688	0.365334	0.356391	0.409354	0.353016	0.385115	0.371382	0.367587	0.345467	0.33325	0.44344	0.368246	0.403	0.454871	0.331763	0.427613	0.405326	0.333426	0.412648	0.334821	0.318068	0.489897	0.325221	0.380069	0.368959	0.371135	0.357665	0.350627	0.323019	0.441055
	6.62953	0.366098	0.406244	0.378764	0.327102	0.39126	0.405091	0.341927	0.417144	0.357491	0.325215	0.321946	0.333247	0.379408	0.337784	0.336578	0.368733	0.326206	0.413453	0.438054	0.400917	0.352412	0.386972	0.361331	0.377057	0.369036	0.363004	0.344734	0.328389	0.425841	0.353771	0.382947	0.44205	0.33111	0.390649	0.399113	0.315636	0.39437	0.335566	0.322042	0.478968	0.309698	0.340919	0.375043	0.356415	0.347207	0.328846	0.36193	0.417858
	6.66283	0.373011	0.421568	0.369499	0.334522	0.385994	0.389609	0.342444	0.399494	0.380546	0.333456	0.327941	0.36402	0.393722	0.360389	0.314751	0.359367	0.334862	0.382288	0.425884	0.402945	0.347406	0.376576	0.33379	0.384265	0.362988	0.3617	0.352545	0.321953	0.406835	0.342626	0.375406	0.442461	0.335816	0.417719	0.403968	0.332119	0.407396	0.334395	0.34949	0.494204	0.31138	0.309386	0.362016	0.368398	0.340679	0.368645	0.365851	0.40017
	6.6962	0.378127	0.438759	0.360383	0.344418	0.412659	0.406076	0.361044	0.404837	0.351149	0.332225	0.315179	0.353822	0.371628	0.316227	0.325935	0.371784	0.345433	0.418001	0.446308	0.374245	0.314762	0.412962	0.363411	0.37691	0.386217	0.394604	0.342068	0.321447	0.413179	0.334602	0.380528	0.452865	0.369691	0.39214	0.381221	0.301964	0.37599	0.336058	0.343256	0.474304	0.337363	0.315829	0.381842	0.364672	0.327818	0.326829	0.360149	0.420245
	6.72952	0.382232	0.414256	0.361638	0.328473	0.397928	0.408323	0.354513	0.41161	0.375209	0.331646	0.338741	0.379868	0.383213	0.330366	0.349429	0.370882	0.343618	0.394931	0.449548	0.381694	0.339821	0.406879	0.378775	0.376792	0.375043	0.355057	0.342262	0.335053	0.423013	0.347252	0.364258	0.452956	0.355668	0.417227	0.385901	0.31617	0.409888	0.339444	0.310474	0.445439	0.324103	0.328292	0.391643	0.320441	0.339694	0.370948	0.360091	0.425649
	6.76285	0.374078	0.39525	0.364243	0.338639	0.397514	0.391319	0.352273	0.39518	0.356125	0.316424	0.35471	0.355407	0.374189	0.338175	0.309647	0.375448	0.361961	0.367649	0.456972	0.39262	0.334914	0.411663	0.357364	0.377009	0.387468	0.367207	0.353057	0.329114	0.438946	0.319566	0.366572	0.438623	0.347077	0.400075	0.373535	0.32334	0.418817	0.313086	0.320542	0.465481	0.324362	0.35979	0.349103	0.368644	0.342161	0.350518	0.349828	0.408995
	6.7962	0.379172	0.426935	0.35512	0.331966	0.383456	0.380697	0.34136	0.395534	0.373771	0.346415	0.318756	0.329383	0.380595	0.326614	0.332814	0.37864	0.357948	0.375466	0.441758	0.379915	0.314366	0.382315	0.335688	0.383189	0.358584	0.371436	0.326483	0.34004	0.413065	0.36709	0.40684	0.457701	0.349653	0.407168	0.361306	0.316901	0.387071	0.341337	0.360468	0.467726	0.306227	0.37815	0.373245	0.351903	0.336488	0.325143	0.373004	0.392365
	6.82953	0.376886	0.417364	0.373571	0.338168	0.392438	0.405265	0.325223	0.40463	0.364387	0.340454	0.364892	0.336123	0.372956	0.316165	0.330589	0.38472	0.329568	0.381031	0.439618	0.387802	0.376755	0.386265	0.356539	0.402416	0.377973	0.360832	0.338101	0.338474	0.443168	0.357795	0.383463	0.438343	0.337686	0.405124	0.362612	0.318981	0.41457	0.343393	0.333951	0.460233	0.312991	0.364299	0.383907	0.357387	0.341102	0.351594	0.35557	0.413206
	6.86283	0.360639	0.439204	0.373344	0.335827	0.406253	0.402017	0.354046	0.397684	0.361337	0.327693	0.339058	0.328254	0.375262	0.326071	0.333716	0.362416	0.350294	0.382999	0.404232	0.373416	0.314033	0.36636	0.348859	0.384781	0.361532	0.348775	0.374658	0.347857	0.444084	0.341578	0.373033	0.429629	0.336534	0.409658	0.384214	0.33168	0.38471	0.319547	0.332816	0.46124	0.32128	0.338302	0.368289	0.375905	0.322878	0.362782	0.330902	0.390705
	6.89618	0.377197	0.411284	0.367597	0.319893	0.381585	0.398552	0.352657	0.386434	0.371087	0.324374	0.331765	0.351692	0.386231	0.32682	0.356176	0.360037	0.315555	0.368517	0.413339	0.38399	0.318664	0.377188	0.375309	0.378126	0.368107	0.380949	0.376855	0.317199	0.422595	0.336517	0.361919	0.447834	0.325113	0.441014	0.373345	0.294331	0.400592	0.338659	0.350715	0.504888	0.324705	0.362167	0.349302	0.368925	0.348549	0.355054	0.361501	0.415511
	6.92952	0.379847	0.42314	0.365122	0.342321	0.371196	0.386457	0.334657	0.390943	0.368351	0.327931	0.334041	0.334135	0.392153	0.337702	0.320856	0.360677	0.339731	0.375232	0.421686	0.376874	0.338168	0.38177	0.349855	0.405023	0.379427	0.363817	0.352454	0.359906	0.423142	0.337418	0.377679	0.42908	0.321307	0.410578	0.386039	0.3148	0.401536	0.33858	0.337353	0.482769	0.326031	0.320795	0.380439	0.376005	0.332382	0.356628	0.342237	0.37792
	6.96287	0.372898	0.41764	0.366333	0.344245	0.399728	0.393764	0.348046	0.398526	0.365382	0.328259	0.345334	0.354525	0.369339	0.32961	0.340048	0.366379	0.338436	0.38631	0.417497	0.362465	0.308932	0.380939	0.352994	0.389201	0.378115	0.350671	0.343371	0.351303	0.437747	0.358846	0.348402	0.426577	0.321393	0.38501	0.348982	0.316361	0.408594	0.340038	0.323722	0.450227	0.318244	0.343999	0.365884	0.34735	0.346656	0.340358	0.353786	0.427485
	6.9962	0.358079	0.406357	0.350928	0.324311	0.356602	0.406907	0.343495	0.403018	0.361643	0.352413	0.341863	0.360493	0.377182	0.304811	0.326229	0.356548	0.328004	0.372039	0.418996	0.385809	0.340412	0.369588	0.361091	0.369422	0.355288	0.346588	0.340509	0.338483	0.422314	0.344294	0.359951	0.440308	0.32704	0.379809	0.353043	0.322662	0.374963	0.343549	0.307928	0.470862	0.326413	0.337481	0.380933	0.352691	0.345527	0.327435	0.320395	0.390017
	7.0295	0.377591	0.431642	0.359664	0.340072	0.388907	0.385051	0.335728	0.393143	0.362717	0.344958	0.324834	0.333549	0.397007	0.329153	0.335653	0.36765	0.33607	0.374112	0.414098	0.390378	0.336602	0.46131	0.350681	0.375557	0.358986	0.347089	0.34613	0.355498	0.43957	0.338595	0.365467	0.429835	0.342907	0.412301	0.386431	0.340151	0.391367	0.317949	0.351744	0.474352	0.324578	0.345116	0.353355	0.360191	0.344103	0.32899	0.358032	0.438784
	7.06285	0.395918	0.413195	0.3542	0.327636	0.383085	0.382687	0.34119	0.378433	0.358444	0.351648	0.361308	0.348712	0.375077	0.338403	0.331628	0.357613	0.351593	0.399663	0.403334	0.377917	0.34394	0.398372	0.360047	0.365679	0.370089	0.334951	0.352724	0.336086	0.425389	0.347811	0.362282	0.440529	0.347117	0.390084	0.360347	0.332383	0.357235	0.343818	0.32265	0.440413	0.326678	0.348394	0.345868	0.333417	0.33295	0.334496	0.348057	0.410902
	7.0962	0.377555	0.3867	0.365679	0.340431	0.372587	0.38901	0.347603	0.390863	0.345205	0.326207	0.299543	0.333144	0.364765	0.326429	0.345537	0.367582	0.326421	0.365643	0.396606	0.384047	0.324745	0.352267	0.350453	0.351477	0.336353	0.370935	0.348265	0.37058	0.439443	0.347854	0.372388	0.423391	0.339594	0.391243	0.369315	0.306	0.381779	0.334874	0.337735	0.436908	0.327647	0.356185	0.37183	0.355961	0.335083	0.350925	0.344216	0.393645
	7.12953	0.387766	0.408855	0.366628	0.331295	0.367333	0.387925	0.324462	0.367028	0.345233	0.33679	0.30995	0.331179	0.381657	0.332267	0.323438	0.360928	0.363023	0.347469	0.423589	0.365699	0.322366	0.327555	0.343483	0.367811	0.358675	0.366243	0.328065	0.356721	0.413352	0.344092	0.37708	0.398565	0.326896	0.380182	0.345299	0.311861	0.387921	0.342676	0.345295	0.441258	0.303126	0.39122	0.393068	0.383334	0.351437	0.35881	0.344067	0.389454
	7.16283	0.37532	0.425429	0.360946	0.34567	0.370158	0.394778	0.35067	0.384303	0.360062	0.316316	0.329797	0.331936	0.368975	0.325886	0.325705	0.342811	0.351471	0.378693	0.446997	0.357307	0.34366	0.405803	0.366551	0.375052	0.359138	0.359801	0.331267	0.344628	0.443553	0.337816	0.381467	0.413759	0.339636	0.39328	0.367289	0.307571	0.368214	0.328752	0.334075	0.450448	0.331807	0.339426	0.378886	0.33143	0.322337	0.35006	0.356339	0.396561
	7.19622	0.365695	0.391392	0.350535	0.334979	0.34746	0.396371	0.342923	0.36435	0.357068	0.331363	0.337198	0.348053	0.397533	0.326756	0.334561	0.360238	0.336773	0.378311	0.454767	0.364672	0.353499	0.380307	0.348868	0.385307	0.359894	0.378763	0.348354	0.326639	0.419294	0.325993	0.357726	0.416821	0.319749	0.40034	0.35281	0.313871	0.35408	0.339653	0.334209	0.455734	0.30495	0.330722	0.355252	0.372828	0.336956	0.34012	0.322662	0.38539
	7.22955	0.359504	0.391166	0.364084	0.34495	0.36448	0.389686	0.345799	0.386143	0.350793	0.336827	0.331834	0.364289	0.356954	0.321998	0.324429	0.366377	0.338784	0.362933	0.39912	0.40127	0.339409	0.397972	0.372029	0.383338	0.356731	0.338847	0.345045	0.344339	0.427391	0.34286	0.355403	0.430224	0.335455	0.379168	0.364898	0.315464	0.388546	0.319421	0.334703	0.443307	0.313985	0.354037	0.367645	0.315227	0.352431	0.329174	0.354211	0.399873
	7.26288	0.382537	0.406846	0.349638	0.329973	0.368804	0.39198	0.359224	0.39137	0.362535	0.33081	0.314797	0.338622	0.378296	0.334997	0.334167	0.367953	0.348011	0.361133	0.418369	0.383729	0.372408	0.350564	0.341087	0.367154	0.343751	0.344669	0.341707	0.331198	0.413053	0.352572	0.380186	0.404972	0.33953	0.373191	0.356909	0.332418	0.373814	0.332192	0.314817	0.450139	0.335601	0.327159	0.349603	0.360492	0.317132	0.352452	0.353689	0.368975
	7.29613	0.367379	0.401245	0.366342	0.319432	0.359325	0.386414	0.314198	0.374166	0.346059	0.333234	0.323272	0.315305	0.374598	0.315699	0.309629	0.336725	0.332188	0.373189	0.418354	0.359269	0.329214	0.383847	0.32238	0.389032	0.359648	0.354895	0.344969	0.312061	0.430714	0.343425	0.366398	0.411474	0.343813	0.379493	0.361502	0.317046	0.364121	0.305435	0.332071	0.439941	0.298969	0.371112	0.358497	0.367204	0.354491	0.329311	0.355619	0.381716
	7.32955	0.374881	0.398285	0.355025	0.34097	0.383991	0.387393	0.340578	0.38635	0.347795	0.348615	0.311678	0.307663	0.36861	0.344838	0.342228	0.385496	0.341722	0.373369	0.391777	0.370464	0.353172	0.39052	0.342288	0.373889	0.371478	0.367064	0.334129	0.332098	0.427956	0.334145	0.376854	0.415773	0.326702	0.399222	0.383642	0.312059	0.37262	0.323538	0.320389	0.406854	0.308928	0.366767	0.366997	0.353231	0.330336	0.36433	0.334767	0.392294
	7.36285	0.372672	0.41889	0.358463	0.337389	0.361087	0.396102	0.351479	0.375681	0.352342	0.330916	0.340694	0.354345	0.380443	0.339729	0.356211	0.357877	0.363909	0.368324	0.412036	0.38513	0.364085	0.377763	0.355676	0.377144	0.368828	0.347981	0.340252	0.312474	0.394227	0.342576	0.353765	0.414328	0.332133	0.378953	0.351036	0.315483	0.353509	0.317578	0.328235	0.412614	0.311026	0.338564	0.372438	0.348322	0.333771	0.31673	0.353714	0.405131
	7.39623	0.38876	0.397185	0.35879	0.337146	0.361335	0.394683	0.3341	0.377851	0.356024	0.340209	0.337699	0.353371	0.364455	0.336511	0.342254	0.359224	0.355383	0.360761	0.418224	0.360346	0.357877	0.373498	0.32829	0.379244	0.362373	0.353206	0.348226	0.346764	0.39812	0.332367	0.378795	0.408593	0.337306	0.361502	0.360878	0.297253	0.352973	0.336199	0.316287	0.40434	0.319075	0.346031	0.370982	0.34594	0.344736	0.340629	0.346502	0.387498
	7.4295	0.384266	0.402362	0.355551	0.335794	0.340092	0.38715	0.346659	0.362357	0.347001	0.333532	0.327798	0.37334	0.371584	0.325284	0.317033	0.364863	0.323628	0.384422	0.434272	0.372378	0.347108	0.326114	0.35934	0.380653	0.336832	0.352967	0.338427	0.314217	0.431448	0.343235	0.345504	0.398446	0.34076	0.388492	0.35861	0.330965	0.354473	0.327142	0.348841	0.43381	0.299301	0.32816	0.341217	0.361076	0.337565	0.363472	0.350867	0.39729
	7.46287	0.37616	0.425477	0.359059	0.349109	0.342887	0.38877	0.340385	0.359943	0.350598	0.331316	0.32034	0.349624	0.386333	0.34871	0.319926	0.361365	0.351985	0.371593	0.407457	0.363635	0.370356	0.399162	0.340896	0.382999	0.385815	0.359273	0.347309	0.332452	0.41718	0.34517	0.35166	0.391318	0.341019	0.368301	0.365439	0.347822	0.375391	0.332263	0.325974	0.439862	0.311696	0.35688	0.356348	0.342301	0.348788	0.344044	0.326733	0.364537
	7.4962	0.364622	0.397636	0.359955	0.330942	0.356085	0.374953	0.330343	0.363692	0.358207	0.331935	0.339874	0.34002	0.390133	0.329942	0.328397	0.366755	0.343817	0.356626	0.404988	0.37306	0.318516	0.383106	0.314984	0.361194	0.36027	0.364156	0.331074	0.339472	0.421654	0.328542	0.368104	0.393124	0.334781	0.382281	0.330191	0.313208	0.345069	0.314172	0.340326	0.42509	0.323701	0.34451	0.377359	0.342765	0.339628	0.344901	0.336823	0.373436
	7.52952	0.353431	0.399967	0.363202	0.338098	0.357968	0.377603	0.345979	0.382653	0.351115	0.325177	0.306564	0.322992	0.365946	0.337741	0.333929	0.358932	0.317033	0.375593	0.426681	0.372725	0.322456	0.363604	0.335476	0.36613	0.331665	0.350264	0.347137	0.344494	0.429804	0.338595	0.346114	0.401058	0.336145	0.389957	0.359511	0.34169	0.352823	0.323482	0.338101	0.454659	0.311065	0.328899	0.371915	0.379192	0.332458	0.376221	0.346366	0.38251
	7.56285	0.392987	0.398091	0.336954	0.336377	0.3873	0.373419	0.357212	0.390097	0.341409	0.329611	0.323313	0.344537	0.371048	0.35776	0.308684	0.365229	0.323995	0.347891	0.400918	0.351451	0.315916	0.334958	0.330855	0.380034	0.359684	0.349979	0.340087	0.301937	0.410719	0.341745	0.344152	0.396012	0.347332	0.396525	0.368163	0.327697	0.361175	0.328707	0.319147	0.455548	0.323741	0.340782	0.363083	0.313482	0.319748	0.351617	0.330549	0.37874
	7.59622	0.364596	0.413841	0.362131	0.332908	0.327416	0.371123	0.364588	0.376242	0.347458	0.333016	0.326392	0.339707	0.37546	0.336962	0.312723	0.348163	0.346288	0.358809	0.406336	0.374309	0.322484	0.371319	0.337678	0.378453	0.355495	0.3522	0.33781	0.333539	0.425723	0.351256	0.367671	0.375537	0.351342	0.365865	0.350731	0.32071	0.349688	0.33236	0.327857	0.449085	0.312653	0.334657	0.374869	0.340278	0.328004	0.358351	0.340246	0.368066
	7.62953	0.364549	0.41298	0.345452	0.337046	0.360627	0.370057	0.341214	0.364069	0.357025	0.331041	0.329857	0.359443	0.371677	0.329782	0.319339	0.338187	0.321778	0.366722	0.418454	0.343012	0.348076	0.395202	0.327473	0.367311	0.358485	0.369081	0.324568	0.326199	0.428888	0.355877	0.350268	0.394865	0.336856	0.372114	0.34106	0.325867	0.352242	0.305493	0.324577	0.456635	0.332252	0.368489	0.374053	0.351929	0.334096	0.350158	0.340438	0.361599
	7.66285	0.363775	0.396256	0.346769	0.334744	0.34681	0.367142	0.352362	0.372635	0.338284	0.331296	0.313331	0.364687	0.371976	0.326984	0.29942	0.355682	0.347082	0.343252	0.392354	0.352905	0.351936	0.342206	0.338664	0.368769	0.367529	0.343347	0.32086	0.327532	0.415356	0.355594	0.372837	0.384639	0.34728	0.386905	0.330195	0.312379	0.349745	0.315556	0.320022	0.420275	0.308206	0.361224	0.380675	0.311384	0.313482	0.352482	0.346713	0.373949
	7.69618	0.377248	0.397121	0.349584	0.315263	0.351805	0.396914	0.334739	0.362917	0.347295	0.340103	0.325802	0.338612	0.366327	0.337898	0.328361	0.351115	0.350674	0.354644	0.415717	0.347003	0.358035	0.373023	0.326151	0.377313	0.386358	0.338846	0.3556	0.315652	0.424778	0.354595	0.3682	0.412035	0.351514	0.389086	0.346038	0.331642	0.344151	0.320128	0.335899	0.404115	0.32377	0.362668	0.381484	0.355978	0.333943	0.381496	0.321248	0.37008
	7.72955	0.376446	0.410392	0.349934	0.319662	0.333815	0.370399	0.358626	0.380094	0.34248	0.354796	0.333187	0.358686	0.375828	0.326926	0.30914	0.349352	0.347956	0.361885	0.402018	0.370483	0.321109	0.377374	0.317695	0.377333	0.307875	0.347187	0.334473	0.346516	0.417482	0.334215	0.348249	0.379377	0.345186	0.381334	0.356141	0.316713	0.33098	0.323883	0.335205	0.416687	0.320536	0.358193	0.357369	0.363454	0.335819	0.312724	0.342226	0.369943
	7.76282	0.380423	0.395876	0.359078	0.331428	0.361842	0.374455	0.327466	0.352229	0.337519	0.344723	0.325677	0.359691	0.372333	0.333814	0.33058	0.363833	0.347862	0.362576	0.427904	0.363624	0.36277	0.378311	0.343837	0.367886	0.339007	0.350015	0.343246	0.343981	0.42105	0.368998	0.35671	0.390143	0.34973	0.384964	0.365837	0.325792	0.343299	0.315207	0.342421	0.424831	0.318127	0.373438	0.360522	0.32026	0.316447	0.362405	0.335614	0.380095
	7.79623	0.388184	0.377657	0.356374	0.324187	0.332032	0.37871	0.367845	0.365556	0.354701	0.332175	0.36791	0.337997	0.39635	0.330235	0.318728	0.370082	0.358226	0.343951	0.406005	0.363732	0.376225	0.32385	0.321744	0.381402	0.361216	0.348418	0.326157	0.354488	0.430393	0.355549	0.346572	0.406072	0.340524	0.390252	0.364329	0.349565	0.335765	0.313002	0.324326	0.430335	0.319227	0.375094	0.356057	0.350677	0.339594	0.354984	0.358158	0.394921
	7.82952	0.365247	0.377833	0.348133	0.339287	0.361383	0.369523	0.319488	0.362596	0.352698	0.348409	0.325644	0.324154	0.368089	0.326752	0.306664	0.352093	0.354508	0.35157	0.392879	0.367469	0.333421	0.342062	0.297995	0.368859	0.353244	0.313203	0.33583	0.330434	0.408528	0.329964	0.350502	0.393565	0.325053	0.391013	0.340048	0.327613	0.355414	0.335602	0.323989	0.404154	0.325227	0.366764	0.374903	0.340529	0.323726	0.344985	0.360411	0.369927
	7.86287	0.365074	0.410542	0.334533	0.328822	0.318174	0.376343	0.350108	0.352763	0.335736	0.341826	0.344234	0.375868	0.382161	0.345252	0.313805	0.352936	0.342573	0.355657	0.402222	0.371975	0.312706	0.374345	0.321615	0.360166	0.334357	0.345211	0.320438	0.340058	0.417828	0.361555	0.371027	0.386609	0.335061	0.386921	0.334249	0.321943	0.360328	0.331611	0.328315	0.402366	0.321996	0.37004	0.376402	0.382734	0.338365	0.356707	0.334822	0.386494
	7.89618	0.369431	0.382548	0.342458	0.345261	0.342415	0.369107	0.352075	0.357971	0.347722	0.334425	0.33751	0.332327	0.375012	0.313073	0.343598	0.375753	0.32866	0.362739	0.38642	0.354685	0.318685	0.340476	0.321975	0.393874	0.340818	0.337743	0.327233	0.326601	0.404858	0.356999	0.34991	0.382716	0.337238	0.365832	0.342495	0.310485	0.351827	0.317957	0.306919	0.415199	0.317553	0.328775	0.356088	0.330757	0.325924	0.363782	0.324069	0.386816
	7.92953	0.37128	0.371828	0.343152	0.341371	0.330194	0.371869	0.341906	0.375556	0.345225	0.330565	0.328485	0.353555	0.38191	0.344001	0.344281	0.35792	0.312825	0.350288	0.371066	0.401161	0.322507	0.298683	0.332851	0.384435	0.3634	0.346559	0.327596	0.341297	0.409374	0.350809	0.360168	0.374707	0.332506	0.359753	0.348262	0.330518	0.337064	0.318545	0.335446	0.389159	0.305651	0.349806	0.380967	0.361329	0.344683	0.354809	0.323084	0.410415
	7.96288	0.369594	0.386759	0.3659	0.317775	0.330276	0.366662	0.34803	0.347732	0.344828	0.311797	0.324518	0.356445	0.384275	0.341867	0.325898	0.361202	0.362923	0.350857	0.405505	0.371062	0.317285	0.331092	0.306577	0.380479	0.367934	0.340883	0.349908	0.338755	0.428118	0.341078	0.359113	0.379494	0.359435	0.357925	0.351097	0.307625	0.331318	0.33102	0.328378	0.408959	0.319723	0.386111	0.373096	0.351841	0.335326	0.385679	0.355222	0.365095
	7.99618	0.365891	0.372127	0.357425	0.336447	0.355725	0.355553	0.354323	0.357783	0.339995	0.349456	0.336688	0.343152	0.36777	0.336657	0.327312	0.34624	0.339165	0.33395	0.402078	0.369644	0.313485	0.354183	0.313175	0.369477	0.39292	0.351316	0.319563	0.334555	0.406742	0.356973	0.357877	0.366791	0.335855	0.365422	0.330734	0.309026	0.33744	0.32407	0.315489	0.428868	0.317192	0.353136	0.350545	0.346681	0.34589	0.3663	0.354603	0.367871
	8.02953	0.36804	0.384592	0.349348	0.335775	0.328897	0.379808	0.322921	0.349851	0.332269	0.341101	0.312406	0.366502	0.366295	0.315859	0.349799	0.365763	0.335167	0.396296	0.365297	0.348729	0.299566	0.352902	0.333364	0.376057	0.345048	0.349083	0.34965	0.330264	0.421156	0.34243	0.358202	0.370591	0.333098	0.364534	0.352509	0.326176	0.323319	0.34137	0.325424	0.403994	0.324348	0.345091	0.388746	0.350047	0.317905	0.33532	0.342902	0.386339
	8.06287	0.363643	0.390267	0.357508	0.324884	0.363592	0.37342	0.337192	0.354767	0.330821	0.34451	0.312429	0.338032	0.356546	0.333386	0.313962	0.355211	0.361807	0.364206	0.409186	0.34811	0.315322	0.379104	0.33116	0.373679	0.356332	0.318987	0.333682	0.331424	0.421194	0.351822	0.355442	0.38749	0.332614	0.360476	0.334607	0.314064	0.3255	0.324488	0.319168	0.456233	0.314448	0.344978	0.345252	0.356071	0.345448	0.353046	0.342937	0.375539
	8.0962	0.38243	0.386919	0.345877	0.338109	0.331745	0.366182	0.345877	0.357122	0.348316	0.340065	0.313652	0.326964	0.367674	0.317804	0.340462	0.348653	0.340732	0.358632	0.397236	0.364925	0.350608	0.342592	0.331139	0.354007	0.362703	0.34094	0.338083	0.312952	0.42105	0.332832	0.343714	0.381665	0.34742	0.361758	0.359005	0.320407	0.324307	0.326415	0.333768	0.430792	0.320231	0.326809	0.379203	0.323771	0.320875	0.354385	0.325508	0.373985
	8.12955	0.376336	0.38083	0.348102	0.33509	0.325091	0.373753	0.371799	0.375493	0.3466	0.33784	0.316985	0.340687	0.370376	0.323426	0.324435	0.356614	0.348578	0.360727	0.388327	0.371651	0.325664	0.359096	0.325523	0.376226	0.37206	0.343883	0.347189	0.325981	0.413707	0.344445	0.344813	0.382066	0.34708	0.370603	0.353711	0.331997	0.322153	0.32786	0.309918	0.410177	0.326681	0.355633	0.380014	0.350078	0.331297	0.342126	0.330253	0.373404
	8.16285	0.377485	0.396175	0.35197	0.338503	0.352143	0.359464	0.332654	0.346669	0.351692	0.335799	0.319454	0.344318	0.365628	0.332333	0.321875	0.368418	0.332926	0.371014	0.377353	0.364472	0.36733	0.338313	0.318852	0.365632	0.354103	0.345948	0.349653	0.333187	0.392229	0.345352	0.345375	0.384401	0.338743	0.378601	0.358461	0.342235	0.327041	0.330165	0.327273	0.399831	0.326345	0.343505	0.360436	0.354928	0.357144	0.385434	0.322022	0.355943
	8.19622	0.388476	0.37941	0.36891	0.327458	0.338297	0.36812	0.365234	0.364737	0.338714	0.335303	0.344034	0.334604	0.378976	0.324591	0.33268	0.353767	0.321353	0.358177	0.384609	0.346154	0.310129	0.359289	0.318999	0.369297	0.362035	0.367639	0.350006	0.346569	0.404532	0.324738	0.349171	0.367165	0.340859	0.368474	0.347348	0.306472	0.338179	0.312445	0.323668	0.392189	0.317032	0.351247	0.394806	0.338638	0.319741	0.371775	0.333417	0.373161
	8.22948	0.371727	0.398873	0.34752	0.341267	0.33897	0.374343	0.346383	0.349782	0.34686	0.319421	0.335868	0.348937	0.372573	0.341775	0.319311	0.354276	0.3278	0.378415	0.387159	0.367707	0.352174	0.366051	0.329599	0.366671	0.368441	0.359047	0.336281	0.338298	0.415684	0.351975	0.372286	0.365564	0.333314	0.371551	0.356092	0.319438	0.337797	0.327052	0.339094	0.402505	0.317761	0.358894	0.363706	0.355501	0.320113	0.353149	0.345384	0.36292
	8.26285	0.38208	0.397271	0.341985	0.336861	0.324129	0.384964	0.354203	0.352839	0.346821	0.326773	0.351673	0.3288	0.378855	0.342494	0.337096	0.355218	0.327022	0.366694	0.406285	0.367156	0.339172	0.385294	0.321618	0.365496	0.344327	0.357373	0.352676	0.342542	0.415164	0.325807	0.355628	0.358535	0.330144	0.355061	0.347424	0.313814	0.317329	0.328909	0.356816	0.452962	0.301712	0.337173	0.378865	0.360043	0.335208	0.383253	0.335443	0.372859
	8.29622	0.378504	0.386822	0.361634	0.32677	0.322334	0.359033	0.348869	0.337124	0.338515	0.315969	0.314252	0.356095	0.377945	0.329254	0.334116	0.35038	0.34093	0.332001	0.358677	0.335309	0.335788	0.355731	0.323529	0.340083	0.337439	0.347712	0.318843	0.321965	0.425984	0.325024	0.354332	0.349092	0.329691	0.34882	0.344998	0.321276	0.328012	0.297658	0.314207	0.387229	0.306846	0.363056	0.360385	0.339969	0.331705	0.357752	0.329653	0.377815
	8.32955	0.362454	0.394116	0.331412	0.325695	0.34091	0.357451	0.334073	0.353405	0.333483	0.343497	0.32259	0.344291	0.383294	0.336627	0.346055	0.359754	0.35443	0.344904	0.39986	0.348276	0.325255	0.398268	0.309304	0.371347	0.325413	0.336724	0.335474	0.331101	0.403484	0.325387	0.364738	0.355157	0.339394	0.358386	0.343751	0.308673	0.335526	0.320232	0.324648	0.385268	0.308318	0.387617	0.353325	0.331268	0.342442	0.405074	0.324727	0.362596
	8.36287	0.379535	0.387547	0.351368	0.333278	0.362546	0.386135	0.330663	0.368609	0.340896	0.337436	0.339282	0.366795	0.365358	0.333631	0.327138	0.343143	0.320219	0.369508	0.38132	0.354	0.323879	0.346532	0.341673	0.3688	0.36595	0.341508	0.325081	0.324135	0.418808	0.340961	0.377499	0.373393	0.332671	0.370876	0.349847	0.314547	0.328535	0.298818	0.33569	0.412108	0.309242	0.331496	0.376434	0.334342	0.339262	0.345383	0.333547	0.364268
	8.3962	0.362736	0.395606	0.343967	0.333266	0.3443	0.380949	0.341401	0.338901	0.356086	0.33978	0.331056	0.320592	0.381457	0.328403	0.310908	0.346478	0.364591	0.351995	0.387901	0.356756	0.369239	0.365469	0.315656	0.368119	0.354598	0.337548	0.350086	0.338591	0.4219	0.348885	0.359658	0.373722	0.338155	0.349716	0.35227	0.326554	0.304668	0.33515	0.352964	0.390962	0.317658	0.341754	0.337332	0.353047	0.325311	0.355661	0.33708	0.383858
	8.42953	0.374349	0.382086	0.330957	0.342047	0.329695	0.379246	0.332583	0.343522	0.331042	0.327677	0.348825	0.342966	0.378564	0.343749	0.324022	0.360072	0.360192	0.348482	0.388818	0.354768	0.369943	0.355212	0.332766	0.355127	0.351974	0.332697	0.342513	0.322929	0.414185	0.334208	0.342791	0.382564	0.319205	0.33993	0.353039	0.333117	0.331604	0.329824	0.365634	0.423558	0.326028	0.356164	0.411251	0.365421	0.332002	0.349203	0.32661	0.370943
	8.4629	0.393674	0.405271	0.338755	0.337135	0.340287	0.380173	0.351679	0.357047	0.344409	0.326698	0.330081	0.357522	0.374144	0.330518	0.336486	0.372469	0.349527	0.364923	0.408116	0.377956	0.319482	0.348938	0.335434	0.370632	0.354171	0.359356	0.316373	0.327995	0.397097	0.352075	0.368905	0.372738	0.348125	0.355338	0.345594	0.340963	0.327748	0.321237	0.311207	0.388122	0.313396	0.366366	0.351354	0.359805	0.331918	0.386281	0.327208	0.353206
	8.4962	0.374851	0.399546	0.353768	0.329422	0.311026	0.374074	0.368597	0.358396	0.334284	0.339425	0.343144	0.355295	0.374858	0.333788	0.332538	0.363045	0.362393	0.367647	0.384462	0.349687	0.319475	0.340857	0.320532	0.373574	0.342293	0.359818	0.331065	0.305695	0.418274	0.334763	0.346935	0.363911	0.344742	0.352102	0.365769	0.32178	0.313577	0.319467	0.361115	0.415814	0.309126	0.370208	0.35047	0.364157	0.328101	0.392327	0.332584	0.371936
	8.52953	0.365874	0.389436	0.344612	0.326765	0.316143	0.363746	0.324484	0.348852	0.341941	0.333162	0.349545	0.351113	0.38042	0.328525	0.325426	0.340304	0.334842	0.354683	0.369387	0.37422	0.323206	0.317582	0.32454	0.367563	0.337822	0.344043	0.311515	0.310437	0.407975	0.343141	0.349244	0.367036	0.338884	0.345512	0.331755	0.295021	0.347844	0.319031	0.332533	0.381115	0.316239	0.310572	0.387498	0.337955	0.344138	0.342454	0.339642	0.355422
	8.56283	0.378742	0.374571	0.33976	0.346355	0.334628	0.369248	0.348096	0.33988	0.327807	0.332985	0.337959	0.335582	0.358549	0.326273	0.357024	0.359476	0.327602	0.331109	0.396475	0.356587	0.349887	0.343919	0.327034	0.349013	0.315339	0.355872	0.355293	0.334817	0.401704	0.333768	0.342185	0.37111	0.334417	0.335297	0.321941	0.331425	0.315053	0.321596	0.359891	0.395197	0.319923	0.361669	0.371853	0.347122	0.331032	0.343286	0.323246	0.357668
	8.59622	0.361676	0.379359	0.332699	0.325344	0.342255	0.36126	0.327426	0.350776	0.336791	0.331992	0.315748	0.330009	0.362548	0.32009	0.328163	0.343547	0.342975	0.361145	0.3749	0.348943	0.351124	0.35941	0.319977	0.358521	0.361316	0.35525	0.343974	0.326676	0.39352	0.356801	0.331978	0.363294	0.328057	0.347134	0.331152	0.31626	0.319912	0.335696	0.335408	0.414276	0.290967	0.337439	0.369293	0.327326	0.323895	0.351787	0.343372	0.358695
	8.62953	0.372666	0.376168	0.35099	0.345191	0.330019	0.384427	0.343809	0.356913	0.349105	0.344544	0.323511	0.32281	0.364803	0.331151	0.316687	0.350558	0.323186	0.352298	0.380645	0.357247	0.353268	0.35048	0.316946	0.35293	0.343317	0.356352	0.333785	0.343964	0.409398	0.346222	0.369313	0.358154	0.349706	0.340846	0.356247	0.337717	0.320239	0.330225	0.331442	0.376342	0.322031	0.332146	0.367462	0.341365	0.330216	0.357738	0.309348	0.359237
	8.66283	0.375071	0.390583	0.337955	0.356175	0.356558	0.360102	0.351482	0.351307	0.338433	0.328056	0.347399	0.337865	0.378496	0.336355	0.316621	0.361264	0.343578	0.35088	0.367045	0.332401	0.368943	0.333588	0.311852	0.358859	0.356257	0.33471	0.318203	0.343685	0.415129	0.332744	0.356704	0.368731	0.323532	0.334572	0.346106	0.311687	0.335173	0.337139	0.333369	0.397056	0.312405	0.348305	0.404258	0.349854	0.331858	0.353195	0.340198	0.363225
	8.6962	0.374309	0.376938	0.342407	0.336543	0.328979	0.374024	0.353168	0.346844	0.346446	0.332163	0.337679	0.323646	0.35807	0.309698	0.330124	0.357753	0.350037	0.342402	0.401798	0.375125	0.322291	0.359566	0.328495	0.368412	0.367412	0.327726	0.330681	0.345424	0.413321	0.358918	0.347846	0.368009	0.352471	0.345077	0.351886	0.331366	0.329294	0.339863	0.331799	0.417114	0.320208	0.337529	0.349173	0.36788	0.326914	0.373817	0.324968	0.356092
	8.72953	0.353782	0.39086	0.344903	0.349173	0.322583	0.380822	0.342168	0.3557	0.334735	0.332442	0.316866	0.351797	0.376942	0.335844	0.326475	0.351905	0.326762	0.35783	0.384245	0.351226	0.326946	0.346214	0.331469	0.373034	0.339559	0.355893	0.333779	0.341754	0.394415	0.350686	0.34442	0.358279	0.319845	0.358124	0.346885	0.317591	0.323985	0.343061	0.335301	0.40002	0.301198	0.346919	0.374802	0.339556	0.328907	0.3738	0.31328	0.353379
	8.76288	0.357128	0.397489	0.358664	0.333498	0.330898	0.373641	0.338267	0.345997	0.330514	0.310321	0.326764	0.363832	0.376405	0.335598	0.351364	0.369837	0.324327	0.365619	0.403821	0.348001	0.334447	0.339538	0.298695	0.355076	0.353612	0.33882	0.323179	0.340273	0.417543	0.353115	0.363321	0.347102	0.335785	0.337792	0.360551	0.317861	0.322574	0.307722	0.32431	0.3796	0.309599	0.346403	0.347208	0.331694	0.3256	0.353053	0.339753	0.330336
	8.79617	0.364298	0.385064	0.364246	0.336832	0.350237	0.354814	0.358104	0.350564	0.342726	0.344117	0.345785	0.333283	0.354202	0.320456	0.331956	0.362332	0.329811	0.373497	0.387171	0.348362	0.33336	0.342113	0.311731	0.372279	0.360451	0.337728	0.366882	0.316521	0.417638	0.365291	0.361835	0.347766	0.358589	0.34549	0.342227	0.335637	0.318031	0.310915	0.345676	0.386279	0.31645	0.344865	0.360355	0.350722	0.32676	0.390701	0.314003	0.361061
	8.82955	0.364598	0.381151	0.339268	0.339544	0.334736	0.37527	0.340039	0.358361	0.347328	0.342557	0.320157	0.32921	0.39397	0.33981	0.319838	0.35645	0.320692	0.335121	0.364712	0.344687	0.384089	0.338094	0.318558	0.368668	0.359031	0.348948	0.336437	0.339994	0.41256	0.36476	0.348255	0.373453	0.323492	0.325754	0.340877	0.315384	0.30983	0.321377	0.328923	0.384375	0.331785	0.337878	0.34038	0.336564	0.331871	0.344602	0.315236	0.350204
	8.86285	0.3623	0.385177	0.351402	0.340222	0.330759	0.37607	0.333568	0.350271	0.341693	0.33049	0.355537	0.345824	0.365662	0.343063	0.342878	0.343897	0.300048	0.355067	0.380044	0.361162	0.359901	0.335396	0.31696	0.36502	0.327928	0.347078	0.334531	0.332606	0.412044	0.359715	0.326488	0.356803	0.326786	0.341996	0.34445	0.330104	0.315054	0.321441	0.337525	0.391567	0.340398	0.355128	0.383991	0.354409	0.337734	0.360971	0.333462	0.355279
	8.8962	0.384037	0.385094	0.360319	0.339647	0.331782	0.385881	0.340955	0.354227	0.347406	0.344485	0.334272	0.338222	0.378642	0.343445	0.334047	0.363158	0.325862	0.342996	0.381505	0.381044	0.348157	0.314715	0.314778	0.358951	0.360063	0.331641	0.343519	0.337328	0.410139	0.352282	0.368958	0.351457	0.331655	0.348343	0.347129	0.321886	0.309476	0.36909	0.301466	0.42059	0.312868	0.36338	0.35154	0.327648	0.344474	0.358462	0.339173	0.338908
	8.92953	0.369578	0.383911	0.357002	0.334061	0.309531	0.357631	0.347724	0.35594	0.348755	0.329472	0.324154	0.346892	0.381481	0.317502	0.331669	0.338634	0.362432	0.362852	0.36628	0.370069	0.374827	0.348187	0.323314	0.365397	0.358526	0.332686	0.3356	0.322441	0.420665	0.359845	0.345976	0.338521	0.335083	0.352658	0.356225	0.305824	0.318451	0.31699	0.305886	0.383557	0.304358	0.309151	0.37582	0.372596	0.329699	0.370164	0.321277	0.355452
	8.96287	0.370597	0.377256	0.341646	0.327987	0.333503	0.374564	0.345249	0.326204	0.335682	0.33588	0.302958	0.35452	0.377827	0.337868	0.304283	0.3542	0.326637	0.360395	0.369593	0.351577	0.351818	0.365788	0.321283	0.361923	0.353169	0.346017	0.336362	0.354401	0.411128	0.346803	0.352934	0.348451	0.345918	0.348777	0.349261	0.323656	0.328085	0.315891	0.337142	0.384557	0.313732	0.305435	0.359181	0.366169	0.331195	0.383966	0.330615	0.365542
	8.99615	0.383317	0.374108	0.338061	0.329175	0.331383	0.360554	0.350523	0.365326	0.340328	0.356462	0.338684	0.368737	0.36425	0.339885	0.330771	0.366464	0.340332	0.350195	0.404777	0.362146	0.321354	0.374652	0.340724	0.351079	0.331562	0.344517	0.346622	0.312969	0.395159	0.357816	0.340983	0.363064	0.337511	0.349244	0.336566	0.327079	0.317965	0.324436	0.339003	0.376314	0.324134	0.36627	0.352594	0.337228	0.33704	0.385771	0.326235	0.365657
	9.02955	0.360623	0.371653	0.36391	0.326767	0.3261	0.361148	0.341519	0.355326	0.339956	0.327981	0.317946	0.34236	0.376065	0.328705	0.310357	0.353826	0.348816	0.335374	0.37384	0.354641	0.372628	0.340927	0.317321	0.35297	0.342418	0.36768	0.318292	0.311573	0.406788	0.359082	0.352169	0.36032	0.332795	0.330888	0.356849	0.332601	0.312092	0.314153	0.348226	0.394227	0.328186	0.345961	0.376421	0.353503	0.326148	0.373187	0.329771	0.340895
	9.06283	0.372898	0.391324	0.351282	0.327794	0.347793	0.378871	0.349761	0.346667	0.330108	0.321256	0.359311	0.309155	0.392883	0.330085	0.332234	0.354017	0.359746	0.365134	0.383444	0.358976	0.341627	0.328999	0.337618	0.352512	0.354163	0.363201	0.345043	0.337537	0.410532	0.363785	0.362883	0.357086	0.343607	0.343363	0.334594	0.312005	0.33402	0.331112	0.331021	0.430043	0.310791	0.341363	0.39176	0.373212	0.334903	0.417965	0.33725	0.354416
	9.09622	0.380428	0.383779	0.350327	0.339614	0.343143	0.362082	0.35991	0.32184	0.347096	0.330158	0.346402	0.334527	0.370108	0.338143	0.344873	0.341876	0.336315	0.355916	0.358772	0.363535	0.310019	0.316015	0.324411	0.354389	0.342355	0.343209	0.319522	0.318514	0.42176	0.338637	0.339682	0.362489	0.331416	0.347355	0.335964	0.306736	0.343337	0.318743	0.30844	0.368338	0.296559	0.315257	0.335227	0.346368	0.346602	0.343685	0.318258	0.351587
	9.12953	0.378545	0.384165	0.340184	0.337602	0.357076	0.373046	0.375778	0.347796	0.349851	0.34665	0.360535	0.348863	0.366592	0.33347	0.3007	0.348236	0.340237	0.373909	0.384251	0.34088	0.319045	0.325523	0.347615	0.36974	0.351126	0.336161	0.319834	0.329716	0.408037	0.362387	0.367947	0.343546	0.354712	0.352178	0.347595	0.325808	0.324265	0.338284	0.327596	0.37973	0.305921	0.352423	0.362775	0.326392	0.332998	0.326679	0.338131	0.355204
	9.16287	0.359282	0.371958	0.336091	0.342846	0.330008	0.369109	0.363992	0.334032	0.339604	0.331119	0.322727	0.353769	0.358022	0.342291	0.311098	0.342635	0.346516	0.342304	0.39616	0.33445	0.338521	0.322703	0.319901	0.366614	0.351592	0.324693	0.341746	0.316719	0.396675	0.339314	0.338959	0.353137	0.349102	0.326847	0.344811	0.322034	0.323028	0.308253	0.353294	0.382516	0.308612	0.346799	0.371382	0.366379	0.320395	0.352396	0.304609	0.354053
	9.19622	0.373671	0.398792	0.365495	0.330474	0.337596	0.372097	0.359196	0.347196	0.338692	0.345938	0.339719	0.332974	0.386697	0.33903	0.343231	0.347852	0.345299	0.353754	0.357739	0.358289	0.335511	0.359948	0.322111	0.368393	0.338286	0.34161	0.356166	0.341406	0.424989	0.346458	0.389338	0.35057	0.365307	0.336243	0.359985	0.317329	0.319017	0.314458	0.333749	0.361344	0.313238	0.330473	0.361624	0.353151	0.319361	0.396908	0.361006	0.333056
	9.22953	0.388218	0.398964	0.341969	0.346149	0.320161	0.354254	0.343781	0.353763	0.331895	0.33817	0.330913	0.313565	0.367505	0.323112	0.33009	0.356969	0.329033	0.363227	0.368164	0.34608	0.348622	0.348883	0.325204	0.358525	0.343695	0.343623	0.333361	0.323264	0.411528	0.337706	0.365458	0.353605	0.323245	0.349733	0.332336	0.319591	0.304018	0.334511	0.342065	0.383768	0.326699	0.367776	0.372797	0.33473	0.348687	0.401237	0.337254	0.361289
	9.26287	0.363263	0.403674	0.333635	0.330287	0.330983	0.361735	0.34071	0.338909	0.334689	0.33747	0.319809	0.308953	0.365407	0.338509	0.348184	0.343842	0.337635	0.357509	0.371475	0.351606	0.3349	0.347657	0.331441	0.362492	0.337894	0.356167	0.342671	0.333545	0.408022	0.357653	0.362027	0.347433	0.340149	0.338877	0.328734	0.314712	0.309927	0.340172	0.332929	0.38954	0.301021	0.344022	0.372871	0.33545	0.337083	0.371592	0.334397	0.348408
	9.29618	0.366146	0.393973	0.341059	0.33925	0.311035	0.366625	0.337382	0.335344	0.346337	0.309447	0.341132	0.335516	0.373864	0.344254	0.304287	0.358123	0.334243	0.371355	0.373016	0.348702	0.323872	0.342009	0.31868	0.333003	0.354926	0.366429	0.318865	0.359447	0.411121	0.353047	0.351899	0.340934	0.335895	0.344966	0.345687	0.327959	0.309878	0.319689	0.312833	0.379293	0.319879	0.339291	0.385167	0.354571	0.337765	0.374161	0.354782	0.340169
	9.32955	0.370819	0.387861	0.341606	0.348222	0.319266	0.354818	0.341688	0.353524	0.335071	0.322485	0.351311	0.352333	0.368979	0.322981	0.317636	0.350784	0.312627	0.346868	0.357302	0.359723	0.379054	0.33303	0.321472	0.360123	0.344118	0.333832	0.335746	0.312338	0.402014	0.361897	0.374073	0.342903	0.317871	0.359721	0.339661	0.329439	0.310789	0.322355	0.336342	0.374966	0.309464	0.347425	0.358193	0.355273	0.341946	0.342552	0.348425	0.350036
	9.36285	0.377995	0.368435	0.343813	0.326747	0.325199	0.368805	0.355063	0.358097	0.333708	0.323311	0.324806	0.345755	0.367678	0.31164	0.333105	0.338521	0.332507	0.367749	0.379624	0.360062	0.333107	0.314464	0.309353	0.352401	0.309364	0.345826	0.338331	0.31263	0.406861	0.336783	0.350935	0.349298	0.342849	0.333247	0.327405	0.33985	0.310283	0.325136	0.32378	0.391493	0.317635	0.31545	0.354128	0.338477	0.329526	0.376369	0.328704	0.344335
	9.39622	0.379191	0.386236	0.330503	0.346224	0.321581	0.377255	0.344009	0.345152	0.337404	0.329991	0.3274	0.3445	0.372832	0.324193	0.308326	0.337339	0.330778	0.377931	0.37542	0.358533	0.337578	0.360731	0.31467	0.376493	0.339467	0.332822	0.333867	0.323148	0.39613	0.356189	0.341985	0.338596	0.33341	0.332114	0.330441	0.315013	0.309694	0.35103	0.333105	0.364888	0.328087	0.361218	0.388123	0.381198	0.349207	0.38347	0.354412	0.32427
	9.42953	0.364577	0.377406	0.36243	0.339945	0.33577	0.362424	0.348531	0.350047	0.343709	0.327815	0.333583	0.319231	0.374708	0.316942	0.313582	0.360104	0.332864	0.362728	0.364933	0.357537	0.335538	0.323048	0.308253	0.369757	0.365672	0.337599	0.328409	0.345061	0.388435	0.331064	0.346241	0.34368	0.322309	0.329947	0.350216	0.307492	0.310254	0.323576	0.338355	0.379593	0.328334	0.375605	0.37475	0.329473	0.331234	0.357906	0.341122	0.335103
	9.46287	0.369977	0.384237	0.348641	0.349852	0.315818	0.355273	0.358628	0.339623	0.345703	0.330506	0.330015	0.362894	0.369178	0.325177	0.310768	0.347974	0.335744	0.346976	0.375854	0.345331	0.354726	0.339286	0.341173	0.389011	0.354971	0.333716	0.341302	0.362267	0.420095	0.338392	0.352217	0.340884	0.316284	0.332296	0.343582	0.325947	0.30816	0.308515	0.330143	0.401258	0.317247	0.344676	0.350273	0.354284	0.331488	0.356939	0.345397	0.358567
	9.49622	0.37132	0.387498	0.343878	0.325417	0.315334	0.341486	0.364246	0.348967	0.33706	0.357619	0.342668	0.325832	0.386651	0.338867	0.337921	0.350084	0.319225	0.357168	0.374593	0.366974	0.339065	0.343175	0.347709	0.370145	0.349323	0.347544	0.337013	0.331167	0.400558	0.364152	0.363811	0.353129	0.335948	0.338312	0.330836	0.316721	0.322667	0.348187	0.34237	0.378332	0.304407	0.326807	0.358513	0.345241	0.330237	0.345899	0.349444	0.326594
	9.52952	0.365765	0.404925	0.359569	0.345944	0.318416	0.368235	0.342196	0.354549	0.334329	0.346625	0.337086	0.344575	0.354619	0.324542	0.316717	0.356529	0.343416	0.351423	0.39817	0.346966	0.387039	0.355549	0.320603	0.367293	0.358549	0.333458	0.327586	0.340268	0.401906	0.343942	0.360596	0.339676	0.322915	0.337083	0.332201	0.323516	0.320873	0.315283	0.331278	0.379209	0.329364	0.327567	0.359487	0.353494	0.334199	0.357715	0.35628	0.335882
	9.56287	0.38081	0.39683	0.350737	0.325022	0.329882	0.350712	0.332694	0.351942	0.330652	0.344692	0.293563	0.366463	0.368767	0.328874	0.294668	0.335422	0.334454	0.344972	0.36674	0.366332	0.349899	0.332588	0.325535	0.389211	0.353152	0.342928	0.324409	0.34349	0.404214	0.347951	0.338959	0.332505	0.330083	0.355387	0.326902	0.302548	0.310449	0.315333	0.337795	0.369679	0.319861	0.339878	0.383047	0.335467	0.331043	0.319773	0.344528	0.361444
	9.5962	0.371326	0.399596	0.341234	0.331929	0.344119	0.363239	0.350122	0.332082	0.336735	0.350817	0.334321	0.332283	0.385768	0.346016	0.314983	0.342423	0.338669	0.353634	0.344708	0.358052	0.307957	0.350444	0.32876	0.360925	0.369377	0.350942	0.334215	0.343221	0.389997	0.337826	0.371382	0.335461	0.329052	0.324229	0.332778	0.324233	0.316708	0.337272	0.336737	0.362417	0.313122	0.336573	0.391026	0.344161	0.323251	0.36457	0.354159	0.345066
	9.62955	0.377336	0.408348	0.329028	0.33122	0.308003	0.359809	0.368877	0.344957	0.342828	0.330463	0.332193	0.350417	0.372122	0.340528	0.335831	0.357487	0.339976	0.353766	0.389075	0.351006	0.321418	0.377289	0.304231	0.358399	0.367413	0.34632	0.347635	0.33546	0.408834	0.337782	0.350302	0.343895	0.324565	0.327164	0.33254	0.306199	0.29496	0.296666	0.303379	0.371477	0.308519	0.325571	0.342781	0.345979	0.343499	0.334015	0.33277	0.355269
	9.6629	0.371928	0.398386	0.343389	0.343925	0.329476	0.374473	0.341298	0.35826	0.348443	0.319992	0.340099	0.345484	0.385552	0.32895	0.324899	0.352267	0.331069	0.341169	0.388974	0.361815	0.3431	0.373138	0.320608	0.369257	0.376127	0.340422	0.341054	0.32555	0.401822	0.341536	0.354003	0.34161	0.307339	0.332768	0.323992	0.3157	0.32274	0.320418	0.33806	0.363139	0.332138	0.375722	0.367495	0.337655	0.329737	0.326994	0.347789	0.372932
	9.69617	0.366314	0.374559	0.338062	0.330085	0.319047	0.370908	0.343233	0.351599	0.338076	0.334353	0.342573	0.359158	0.391024	0.343661	0.331286	0.364596	0.335691	0.352275	0.375555	0.352433	0.357382	0.327162	0.324464	0.350374	0.324355	0.323276	0.344593	0.340967	0.407231	0.331353	0.345109	0.349242	0.328284	0.34973	0.345382	0.316247	0.358264	0.31497	0.337778	0.396191	0.313469	0.343511	0.375462	0.33965	0.326884	0.369733	0.332415	0.355098
	9.72952	0.363656	0.396861	0.345772	0.348168	0.36082	0.363196	0.348697	0.346808	0.330312	0.322032	0.367488	0.366283	0.368309	0.351848	0.320716	0.337557	0.335582	0.357198	0.37182	0.345328	0.348715	0.356675	0.338322	0.355189	0.342728	0.328852	0.348403	0.324297	0.409648	0.353083	0.356787	0.34154	0.325023	0.329941	0.331752	0.312571	0.307614	0.337464	0.319926	0.377504	0.329535	0.32701	0.376464	0.345239	0.339907	0.357361	0.356286	0.339963
	9.76287	0.364057	0.373772	0.348453	0.34706	0.335374	0.36561	0.357446	0.337611	0.338985	0.325504	0.316532	0.33977	0.370429	0.343931	0.326985	0.341661	0.337826	0.358024	0.351728	0.346107	0.33525	0.387321	0.311672	0.33948	0.349126	0.361414	0.31461	0.319535	0.398005	0.349734	0.3329	0.354584	0.317093	0.31262	0.318064	0.318601	0.324045	0.314918	0.365708	0.372015	0.314518	0.347614	0.382641	0.354502	0.34642	0.36913	0.391077	0.321853
	9.79618	0.376465	0.373934	0.337469	0.320759	0.302156	0.351265	0.337476	0.33866	0.328842	0.313984	0.326191	0.376139	0.388946	0.317239	0.317033	0.353506	0.330519	0.349059	0.384325	0.332498	0.331433	0.343573	0.305531	0.328869	0.348222	0.322455	0.318522	0.334168	0.371546	0.35322	0.334635	0.340541	0.328306	0.314719	0.335526	0.308093	0.314026	0.330385	0.316158	0.374058	0.321005	0.352555	0.364056	0.318318	0.327919	0.342179	0.351679	0.346257
	9.82955	0.371401	0.364437	0.353988	0.33385	0.330658	0.368775	0.35925	0.358951	0.335245	0.33008	0.332234	0.362729	0.381496	0.332488	0.336666	0.352173	0.338702	0.374285	0.347007	0.360197	0.339392	0.381407	0.328035	0.356261	0.356555	0.329579	0.330678	0.346103	0.39984	0.34961	0.335298	0.337511	0.335877	0.347562	0.31992	0.312136	0.325106	0.325523	0.342258	0.381903	0.32669	0.34137	0.389727	0.363586	0.334738	0.332596	0.35477	0.356173
	9.86287	0.355771	0.372729	0.341417	0.311047	0.321844	0.34981	0.351124	0.349273	0.324603	0.333203	0.341028	0.342464	0.386083	0.306771	0.325035	0.334563	0.328241	0.370296	0.36752	0.341288	0.356962	0.365408	0.313879	0.351777	0.321692	0.35707	0.331911	0.331735	0.406527	0.346642	0.354276	0.347428	0.326337	0.317743	0.35173	0.334148	0.318131	0.304135	0.351238	0.375528	0.324169	0.36095	0.386279	0.371029	0.341071	0.320988	0.330848	0.345963
	9.89618	0.364533	0.380465	0.350905	0.328994	0.321381	0.370532	0.345658	0.360495	0.331363	0.342656	0.339395	0.350482	0.372957	0.34232	0.31646	0.357922	0.308642	0.343472	0.371914	0.355162	0.371293	0.358751	0.324579	0.347785	0.361511	0.318254	0.31592	0.32406	0.398347	0.351961	0.341874	0.338882	0.326718	0.33986	0.362656	0.299811	0.307903	0.319134	0.351138	0.394679	0.323104	0.342006	0.37356	0.359643	0.335549	0.346274	0.339756	0.326634
	9.92952	0.356772	0.360343	0.339894	0.322197	0.31713	0.357844	0.351884	0.332407	0.33263	0.344254	0.336975	0.336845	0.372307	0.315509	0.326363	0.321743	0.34627	0.359737	0.375536	0.351953	0.362266	0.347778	0.321333	0.335313	0.338806	0.327402	0.321036	0.319197	0.401543	0.34275	0.347422	0.337086	0.326246	0.331722	0.32213	0.303388	0.323999	0.314738	0.323754	0.359715	0.31333	0.356222	0.359755	0.360717	0.339673	0.377747	0.344867	0.353882
	9.96287	0.417246	0.390762	0.356806	0.327866	0.324672	0.397308	0.342935	0.359875	0.354194	0.347706	0.320259	0.29908	0.387541	0.330145	0.322343	0.349479	0.321659	0.355433	0.399108	0.353858	0.330087	0.350913	0.316348	0.35524	0.316685	0.355386	0.343775	0.346954	0.415099	0.352727	0.383754	0.336575	0.339234	0.336829	0.321892	0.336511	0.320309	0.307136	0.348684	0.363618	0.320764	0.373416	0.37368	0.38696	0.330939	0.364525	0.345351	0.358719
	9.99618	0.446528	0.390111	0.389466	0.358764	0.350589	0.440813	0.394116	0.36721	0.360657	0.335702	0.353522	0.336361	0.439944	0.363779	0.335829	0.370542	0.328578	0.39032	0.388779	0.389213	0.343174	0.362329	0.338919	0.363342	0.335519	0.370683	0.339791	0.365751	0.461658	0.383847	0.403574	0.356094	0.345045	0.340475	0.375695	0.37493	0.329966	0.318408	0.371851	0.409933	0.329807	0.344491	0.387307	0.448875	0.348731	0.345312	0.376502	0.363555
	10.0296	0.532039	0.415917	0.403631	0.357328	0.360687	0.471322	0.427695	0.392883	0.413628	0.39137	0.370224	0.365043	0.478179	0.333797	0.342455	0.380159	0.345028	0.420039	0.434565	0.375205	0.40018	0.40444	0.368542	0.42135	0.3714	0.399917	0.337642	0.381246	0.526143	0.381209	0.462428	0.382512	0.359216	0.377178	0.380871	0.454214	0.343544	0.342283	0.401189	0.39274	0.342158	0.451769	0.434506	0.563628	0.342842	0.322886	0.373908	0.447253
	10.0628	0.589872	0.443934	0.420022	0.367838	0.420627	0.503405	0.487608	0.419493	0.434694	0.415934	0.401347	0.337157	0.538284	0.3671	0.359565	0.433849	0.367169	0.439512	0.459214	0.431319	0.417182	0.398019	0.388415	0.438562	0.382964	0.399381	0.3555	0.385546	0.520646	0.41964	0.503434	0.387739	0.376768	0.35783	0.411812	0.44843	0.364437	0.34496	0.424708	0.415353	0.347893	0.484822	0.461918	0.652525	0.375877	0.350709	0.39906	0.501717
	10.0962	0.668828	0.49247	0.446545	0.406641	0.424664	0.532324	0.568172	0.447785	0.429773	0.451254	0.381299	0.368509	0.612177	0.382401	0.362206	0.435461	0.392137	0.469042	0.554902	0.491167	0.471587	0.388127	0.417342	0.521652	0.405682	0.428698	0.378539	0.39938	0.596325	0.476226	0.543029	0.441263	0.377814	0.375044	0.468233	0.541587	0.383498	0.387633	0.457829	0.415464	0.37915	0.526329	0.553847	0.801772	0.382269	0.377176	0.415966	0.512731
	10.1295	0.781611	0.471546	0.458534	0.414723	0.443946	0.559919	0.594377	0.465116	0.474151	0.472696	0.420768	0.3687	0.674985	0.373092	0.365224	0.449366	0.393736	0.479449	0.537991	0.497856	0.484481	0.409198	0.451522	0.541348	0.419412	0.401766	0.378745	0.433114	0.598186	0.469857	0.583113	0.454961	0.400778	0.391662	0.491916	0.573626	0.388463	0.397807	0.478741	0.413814	0.378682	0.551188	0.540369	0.857352	0.383974	0.356445	0.40129	0.545477
	10.1628	0.864942	0.496012	0.479621	0.423262	0.514772	0.588444	0.605951	0.53333	0.487257	0.459838	0.435491	0.384265	0.726625	0.384235	0.374524	0.454914	0.447968	0.505221	0.544605	0.550708	0.481533	0.439889	0.493738	0.57429	0.428588	0.433395	0.36681	0.428319	0.662795	0.486535	0.650882	0.473063	0.43067	0.404208	0.529623	0.610061	0.399028	0.402005	0.547532	0.415769	0.387644	0.595564	0.657512	0.893659	0.390071	0.422186	0.441587	0.58935
	10.1962	0.926756	0.484594	0.493345	0.451759	0.524142	0.615493	0.697652	0.555337	0.507029	0.492221	0.467902	0.400546	0.837908	0.388002	0.398943	0.487861	0.467308	0.539156	0.615615	0.579676	0.446689	0.403329	0.520951	0.63213	0.470268	0.495905	0.3846	0.469456	0.716429	0.529026	0.699018	0.514422	0.449214	0.374925	0.528173	0.702464	0.394956	0.378313	0.53463	0.408387	0.393995	0.660521	0.688461	1.0722	0.388004	0.413642	0.43031	0.683798
	10.2295	0.993309	0.533373	0.544088	0.454913	0.576014	0.653671	0.695748	0.611303	0.529919	0.505303	0.453914	0.367559	0.857116	0.385588	0.396303	0.516323	0.435182	0.557485	0.643862	0.601151	0.524535	0.46821	0.545935	0.676336	0.484321	0.517486	0.384311	0.494316	0.785237	0.54848	0.759958	0.529597	0.464606	0.407924	0.603896	0.716355	0.42261	0.38969	0.584402	0.40156	0.415193	0.691371	0.673526	1.04416	0.40814	0.416963	0.427377	0.726159
	10.2628	1.08045	0.522415	0.552173	0.524422	0.579958	0.747009	0.762439	0.66475	0.54921	0.55836	0.469805	0.398571	0.940716	0.400896	0.390732	0.549757	0.468221	0.61737	0.642647	0.664206	0.53814	0.454963	0.588235	0.721841	0.482277	0.491971	0.398181	0.48848	0.851137	0.605693	0.821364	0.554354	0.519703	0.443415	0.621667	0.798514	0.446081	0.410218	0.609248	0.442997	0.422181	0.695639	0.724918	1.16158	0.432187	0.390141	0.462476	0.769506
	10.2962	1.1533	0.556111	0.584564	0.513611	0.620246	0.836409	0.76114	0.711184	0.571062	0.558398	0.494904	0.415884	0.94311	0.383265	0.432804	0.602914	0.453606	0.6118	0.63967	0.694977	0.533382	0.456377	0.587898	0.759104	0.481951	0.535344	0.383413	0.488968	0.908325	0.646132	0.855445	0.566602	0.517945	0.434747	0.645927	0.922238	0.435611	0.436767	0.633366	0.40372	0.436823	0.724171	0.729097	1.17353	0.426616	0.452534	0.468251	0.804008
	10.3295	1.20014	0.576388	0.618242	0.555878	0.678818	0.90344	0.823335	0.728022	0.60466	0.609902	0.502303	0.434687	1.07188	0.421068	0.396134	0.610465	0.498516	0.653553	0.766237	0.712684	0.615645	0.525669	0.590155	0.83708	0.483588	0.541249	0.387311	0.513329	0.952573	0.699178	0.942857	0.598554	0.542109	0.438715	0.733636	0.912739	0.477717	0.454307	0.696139	0.44179	0.468502	0.821474	0.844295	1.26156	0.447199	0.431882	0.481781	0.841972
	10.3629	1.22075	0.607989	0.615685	0.543569	0.722667	1.03171	0.883378	0.785167	0.626801	0.62286	0.565582	0.393543	1.11916	0.4481	0.448251	0.640308	0.506152	0.676192	0.834954	0.757573	0.540858	0.477387	0.599649	0.891806	0.519292	0.573675	0.421551	0.52756	1.05204	0.722962	0.927719	0.619846	0.56257	0.4546	0.749103	0.906074	0.469761	0.474088	0.707819	0.467642	0.427973	0.869424	0.916918	1.27442	0.460988	0.432075	0.533425	0.851912
	10.3962	1.33333	0.627311	0.667458	0.634091	0.766014	1.17866	0.897258	0.838528	0.636982	0.646188	0.523486	0.399654	1.13004	0.444032	0.431584	0.6438	0.530146	0.651005	0.894978	0.8427	0.647145	0.4687	0.65098	0.947284	0.529613	0.586416	0.398004	0.499483	1.01787	0.813383	0.949194	0.628534	0.598261	0.491132	0.743921	1.01486	0.470796	0.459774	0.757665	0.45933	0.467124	0.908957	0.94049	1.38413	0.483819	0.461218	0.513607	0.927012
	10.4295	1.38862	0.630999	0.643611	0.591861	0.85854	1.16308	0.997208	0.859574	0.664108	0.621339	0.6049	0.428525	1.20562	0.446233	0.449943	0.700502	0.569904	0.699855	0.994272	0.796547	0.72206	0.534347	0.690221	1.00677	0.547317	0.568588	0.420139	0.558061	1.05652	0.884454	0.999408	0.674708	0.59492	0.47473	0.847897	1.07232	0.485743	0.480593	0.717901	0.46878	0.464932	0.844443	1.01683	1.50984	0.494276	0.404084	0.514883	1.00819
	10.4628	1.39453	0.614545	0.653923	0.585824	0.817056	1.2861	0.933966	0.84069	0.700672	0.68843	0.607703	0.397677	1.24349	0.462476	0.456145	0.707427	0.515233	0.708613	1.10979	0.873383	0.651406	0.521357	0.697256	1.12154	0.512135	0.623452	0.444135	0.572425	1.13467	0.852899	1.0798	0.681695	0.564225	0.505573	0.822429	1.10028	0.492486	0.487434	0.760971	0.455068	0.473265	0.93225	1.04647	1.58769	0.500382	0.396119	0.567357	1.00771
	10.4962	1.42997	0.676283	0.710179	0.647006	0.914382	1.36914	1.05531	0.945777	0.701533	0.70964	0.598226	0.41345	1.27986	0.484013	0.484303	0.732747	0.551705	0.724487	1.16691	0.845348	0.709921	0.495284	0.683035	1.19738	0.532965	0.632827	0.447843	0.553139	1.07726	0.873012	1.07979	0.703143	0.613005	0.49958	0.875243	1.07137	0.522986	0.509644	0.810599	0.497095	0.459855	1.00377	1.01031	1.61734	0.523021	0.448337	0.53052	1.14952
	10.5296	1.47553	0.67799	0.727944	0.627442	0.991367	1.48161	1.04313	0.92096	0.69739	0.722347	0.59893	0.422654	1.32922	0.475055	0.506923	0.730895	0.57053	0.750532	1.37709	0.916696	0.713835	0.539469	0.70262	1.22854	0.577061	0.654641	0.45713	0.623447	1.18765	0.924682	1.13542	0.747828	0.654529	0.524769	0.871303	1.16457	0.526801	0.529522	0.810257	0.49836	0.469203	0.935815	1.08969	1.447	0.519874	0.46603	0.590213	1.18431
	10.5628	1.52444	0.696892	0.746835	0.684492	1.02038	1.60222	1.08179	0.973089	0.765778	0.717151	0.674901	0.445327	1.33579	0.50246	0.481379	0.745895	0.582293	0.715935	1.4424	0.911158	0.736981	0.528901	0.68227	1.4088	0.636197	0.672357	0.481574	0.611455	1.10238	1.02473	1.12852	0.713909	0.666517	0.524143	0.912671	1.1621	0.516726	0.553024	0.899032	0.470912	0.518556	0.974911	1.15838	1.57114	0.523914	0.484717	0.594302	1.22215
	10.5962	1.57374	0.704656	0.761463	0.704325	1.17237	1.68304	1.13711	1.01502	0.751777	0.775773	0.651752	0.418396	1.40529	0.494787	0.502975	0.788698	0.602851	0.735417	1.56931	0.954565	0.680608	0.511974	0.724176	1.48058	0.591968	0.69909	0.474965	0.632716	1.14248	1.03906	1.21528	0.760241	0.682173	0.571331	0.931715	1.21757	0.557531	0.617926	0.843973	0.512392	0.514675	1.14163	1.15322	1.79447	0.539529	0.479846	0.588899	1.20678
	10.6295	1.5468	0.707326	0.770137	0.755107	1.13308	1.79882	1.13265	1.05096	0.77274	0.788679	0.680526	0.423679	1.52751	0.505848	0.486077	0.819549	0.607455	0.781099	1.64388	0.952671	0.706523	0.528969	0.783068	1.61953	0.636961	0.712395	0.487145	0.673837	1.16575	1.0652	1.15772	0.82096	0.681517	0.582943	0.924086	1.15429	0.569019	0.566238	0.917616	0.535206	0.556023	1.01943	1.31714	1.72956	0.563516	0.535616	0.65789	1.26696
	10.6629	1.56728	0.749923	0.793635	0.799717	1.25555	1.79845	1.10806	1.0264	0.796352	0.759777	0.707098	0.43644	1.47354	0.520227	0.49327	0.850881	0.601295	0.818416	1.84651	1.06035	0.760819	0.59561	0.734409	1.73092	0.61234	0.738605	0.495454	0.64082	1.05541	1.06828	1.24157	0.827633	0.714578	0.553176	0.910695	1.13044	0.577568	0.557347	0.934641	0.489765	0.54348	1.15249	1.14541	1.69731	0.560377	0.483106	0.611688	1.33571
	10.6962	1.60372	0.755397	0.80892	0.775842	1.31135	1.79179	1.09333	1.17338	0.814576	0.815296	0.672065	0.426573	1.58551	0.522734	0.532219	0.898742	0.639685	0.849296	2.05383	1.05195	0.8236	0.676035	0.832379	1.77611	0.615591	0.72566	0.519978	0.704238	1.08046	1.00415	1.3073	0.821565	0.739688	0.55209	0.98001	1.19648	0.588904	0.601722	0.93291	0.470517	0.594494	0.933217	1.19305	1.68254	0.583702	0.446107	0.646719	1.2915
	10.7295	1.7415	0.745579	0.895021	0.827161	1.26254	1.91251	1.13961	1.15501	0.858516	0.813895	0.665271	0.446486	1.60597	0.522904	0.514526	0.93159	0.654663	0.845522	1.90194	1.04865	0.865336	0.565651	0.823584	1.85741	0.666314	0.771254	0.513619	0.676619	1.11921	1.06259	1.15982	0.887645	0.744364	0.573441	1.01707	1.28404	0.565055	0.613228	0.958002	0.533369	0.555665	1.10061	1.23176	1.70338	0.599206	0.52099	0.689502	1.34572
	10.7628	1.71882	0.770801	0.869252	0.812527	1.22767	1.98404	1.18604	1.17295	0.818221	0.791666	0.738894	0.48899	1.70553	0.559404	0.51715	0.972663	0.654748	0.835052	2.09765	1.11512	0.867521	0.610076	0.845247	1.87236	0.645818	0.78888	0.562366	0.714233	1.13662	1.09905	1.30812	0.892649	0.780751	0.581799	1.02975	1.20572	0.586299	0.581034	0.984309	0.499585	0.554465	1.13032	1.29343	1.72694	0.587522	0.528606	0.653719	1.41098
	10.7962	1.71488	0.746012	0.858482	0.837966	1.44554	1.87534	1.15973	1.14439	0.859567	0.859652	0.752317	0.4819	1.78645	0.563299	0.535098	0.949733	0.631367	0.883845	2.11229	1.0185	0.94129	0.614348	0.819092	1.97084	0.677166	0.814007	0.530095	0.749956	1.14243	1.0891	1.28736	0.982113	0.797133	0.580632	0.985617	1.30085	0.615925	0.573514	0.909806	0.481909	0.588782	1.10206	1.20358	1.71707	0.643857	0.581689	0.714357	1.44012
	10.8295	1.69622	0.781655	0.880623	0.854539	1.33511	1.96544	1.19023	1.23249	0.836321	0.815343	0.783205	0.476813	1.74385	0.577806	0.544949	1.02309	0.73782	0.877599	2.16717	1.14549	0.949456	0.628368	0.865102	1.98174	0.691678	0.829329	0.558625	0.703832	1.08851	1.11427	1.31503	1.0201	0.816283	0.605439	1.03413	1.2473	0.639477	0.615948	0.963955	0.53269	0.598564	1.22508	1.32039	1.81252	0.694559	0.548616	0.712911	1.49609
	10.8629	1.76788	0.800492	0.888722	0.954788	1.38874	2.15084	1.14957	1.27391	0.91593	0.893534	0.761986	0.453178	1.7549	0.598015	0.533257	1.06815	0.712282	0.844091	1.97776	1.16926	1.07304	0.633082	0.86479	2.17305	0.722766	0.833114	0.569266	0.715544	1.09085	1.17087	1.37818	1.02629	0.830427	0.598803	1.04943	1.3551	0.651019	0.630769	0.964086	0.542774	0.668798	1.10595	1.31315	1.76774	0.680696	0.520423	0.665205	1.51229
	10.8962	1.7744	0.876556	0.90974	0.906009	1.52062	2.07925	1.12408	1.28673	0.860436	0.900607	0.782822	0.457523	1.87322	0.616571	0.588786	1.11559	0.632653	0.904906	2.07313	1.16783	1.18038	0.667818	0.7803	1.99951	0.688408	0.859295	0.571838	0.791579	1.16652	1.13605	1.43183	0.97479	0.800607	0.589375	1.01313	1.36503	0.633557	0.606462	1.00237	0.543387	0.645744	1.23433	1.36564	1.71271	0.712104	0.577497	0.708506	1.5018
	10.9296	1.70888	0.827811	0.945799	0.915581	1.54641	2.08622	1.14818	1.22236	0.847313	0.892324	0.808276	0.496079	1.82373	0.575858	0.589165	1.14916	0.732159	0.863462	1.99173	1.16902	1.20409	0.647724	0.844788	1.85654	0.716953	0.866902	0.587802	0.758648	1.13003	1.13638	1.31141	1.02448	0.817447	0.611456	1.05517	1.30617	0.647904	0.577437	0.925669	0.592208	0.645868	1.21784	1.35766	1.68009	0.677496	0.572975	0.708195	1.51202
	10.9629	1.66598	0.854661	0.949134	0.902797	1.58363	1.94069	1.16203	1.30444	0.875325	0.948529	0.796723	0.489256	1.82291	0.595906	0.558965	1.16971	0.678378	0.913934	1.99312	1.1623	1.234	0.625815	0.882734	1.98346	0.709652	0.881334	0.588934	0.81098	1.12288	1.20387	1.32317	1.0548	0.872285	0.651685	1.04679	1.37447	0.63855	0.652341	1.00331	0.529525	0.653332	1.15275	1.39749	1.82478	0.692243	0.507503	0.73195	1.5856
	10.9962	1.75893	0.867015	1.03317	0.971504	1.71179	2.02459	1.14982	1.27306	0.860045	0.988678	0.785792	0.541193	1.9472	0.619068	0.576381	1.23204	0.725408	0.878323	1.99032	1.22401	1.31573	0.593822	0.852955	1.99051	0.696259	0.895557	0.597479	0.751741	1.06818	1.16815	1.39587	1.04441	0.846308	0.647368	1.08351	1.40958	0.671205	0.662423	0.972544	0.55377	0.622044	1.18375	1.35245	1.92221	0.726232	0.597105	0.694207	1.4922
	11.0295	1.81656	0.886467	0.960149	0.940811	1.54615	2.06891	1.20481	1.32111	0.872749	1.02485	0.856923	0.517869	1.90245	0.631504	0.545074	1.2044	0.691475	0.940591	2.04255	1.24086	1.18675	0.650767	0.868414	2.01381	0.695561	0.891452	0.5711	0.800788	1.13269	1.24252	1.40645	1.07167	0.793692	0.661809	1.04947	1.34426	0.657943	0.636192	1.02668	0.577894	0.653141	1.2108	1.33455	1.85258	0.772374	0.563496	0.731569	1.55668
	11.0629	1.83835	0.93864	1.00661	0.963346	1.54942	2.07935	1.1136	1.33396	0.907871	1.01037	0.845091	0.485346	1.89054	0.605087	0.60373	1.24104	0.711183	0.955809	1.77418	1.20397	1.18993	0.723258	0.873227	1.99663	0.713685	0.924667	0.617993	0.802038	1.0407	1.16459	1.48869	1.12857	0.792263	0.657424	1.10345	1.35553	0.63422	0.648457	0.99348	0.550548	0.624501	1.04675	1.58928	1.90629	0.751565	0.584192	0.768296	1.69917
	11.0962	1.8031	0.827811	1.00355	0.984461	1.65175	2.03597	1.11416	1.31099	0.913733	1.03854	0.81848	0.507771	2.00025	0.674944	0.613292	1.2902	0.691672	0.925346	2.08595	1.27023	1.3418	0.622299	0.849427	1.91998	0.764315	0.884011	0.597972	0.822079	1.07637	1.24412	1.34042	1.10727	0.858973	0.674876	1.07752	1.32813	0.664853	0.64187	0.968779	0.536466	0.69111	1.23332	1.4454	1.82524	0.799985	0.54688	0.757935	1.6983
	11.1295	1.74813	0.932813	1.04445	1.03218	1.68476	2.07678	1.14063	1.39989	0.934085	1.00395	0.836665	0.497116	2.008	0.655019	0.605832	1.3679	0.754334	0.915541	2.09954	1.29877	1.48418	0.66527	0.851995	1.95375	0.702964	0.962798	0.621366	0.810969	1.02567	1.22556	1.53139	1.19447	0.815173	0.680593	1.04787	1.33058	0.679478	0.673155	1.06048	0.572857	0.705763	1.33818	1.36802	1.85308	0.819089	0.570701	0.825683	1.69425
	11.1629	1.72551	0.924787	1.04732	1.04712	1.88335	2.08487	1.1479	1.42374	0.983079	0.974593	0.82685	0.513473	1.95921	0.657023	0.597128	1.36594	0.759178	0.961502	2.20603	1.36109	1.47833	0.673337	0.832738	1.9234	0.699509	0.936653	0.6106	0.893094	1.08474	1.2093	1.36348	1.11608	0.841963	0.72434	1.0679	1.3626	0.677841	0.668041	1.04418	0.566528	0.657681	1.32955	1.48036	2.06344	0.817657	0.620373	0.807266	1.64281
	11.1962	1.80261	0.908856	1.06059	1.03011	1.75746	1.9991	1.21118	1.39728	0.934624	1.01942	0.813297	0.518766	1.96617	0.672018	0.606947	1.43034	0.75076	0.902445	1.91484	1.26946	1.62706	0.68631	0.854639	2.05971	0.70256	1.00229	0.584054	0.873323	1.09751	1.22142	1.406	1.08328	0.818484	0.721439	1.09484	1.32633	0.741885	0.651464	1.0662	0.56594	0.684443	1.32878	1.57134	1.80226	0.85775	0.633315	0.795889	1.67233
	11.2295	1.84433	0.922903	1.08715	1.06618	2.00546	2.07612	1.25934	1.44012	0.98756	1.03183	0.894535	0.541362	1.9841	0.667539	0.646018	1.37833	0.719556	0.899707	2.01575	1.25195	1.71265	0.694691	0.912154	1.9051	0.705203	0.931128	0.611782	0.831902	1.04075	1.21266	1.37535	1.16146	0.830129	0.677745	1.14169	1.28368	0.729498	0.699861	0.982749	0.582373	0.684572	1.29481	1.57826	1.80024	0.864988	0.632865	0.829659	1.64831
	11.2629	1.80933	0.932604	1.1115	1.03937	1.96827	2.05973	1.1766	1.44516	1.00522	0.968541	0.860179	0.498941	2.01666	0.741267	0.622566	1.47582	0.814005	0.932878	1.88275	1.20155	1.73209	0.624095	0.873544	1.88872	0.728608	0.959644	0.592566	0.873363	1.04026	1.26989	1.431	1.19481	0.783651	0.744521	1.09816	1.35186	0.70534	0.6296	1.02204	0.587536	0.724649	1.27333	1.65169	1.92645	0.869137	0.622214	0.840536	1.71603
	11.2962	1.89741	0.943452	1.08007	1.10952	1.77199	2.04028	1.12392	1.3988	0.981804	1.01047	0.834865	0.525622	1.98795	0.664691	0.639819	1.52607	0.770635	0.952432	2.02425	1.31767	2.11717	0.629508	0.882618	1.94395	0.74554	1.02103	0.638734	0.851752	1.08672	1.21021	1.3882	1.20217	0.796685	0.746947	1.09984	1.4053	0.704126	0.696753	1.15127	0.54704	0.75961	1.34163	1.479	1.88923	0.888581	0.603069	0.827605	1.71524
	11.3295	1.84899	1.00148	1.13322	1.02483	1.9711	2.00637	1.15898	1.53651	1.06336	1.02583	0.843745	0.584505	1.89576	0.672023	0.601657	1.57264	0.799223	0.934941	1.82639	1.3669	1.75276	0.705726	0.920794	1.99716	0.756628	0.957646	0.599011	0.890083	1.08691	1.30182	1.52386	1.20088	0.874403	0.772517	1.0554	1.25805	0.758371	0.705913	1.06352	0.563359	0.796879	1.29539	1.50178	2.03003	0.913347	0.661555	0.854363	1.78541
	11.3629	1.90452	0.993202	1.15563	1.12356	1.94638	1.97463	1.12916	1.54313	0.995611	1.02107	0.831927	0.554465	1.93199	0.702708	0.647142	1.53428	0.82679	0.96436	1.90698	1.29727	1.73441	0.684158	0.833651	1.97775	0.771318	0.999698	0.610183	0.846892	1.05553	1.2121	1.39852	1.24279	0.879525	0.763174	1.07716	1.39214	0.748296	0.711859	0.999128	0.532824	0.709745	1.25615	1.56335	1.97205	0.868376	0.564197	0.827417	1.76716
	11.3962	1.77676	0.96313	1.18121	1.07167	1.92462	2.00749	1.16095	1.38202	1.02739	0.95371	0.824067	0.573585	1.96309	0.715932	0.653888	1.53108	0.844013	0.972442	1.86385	1.29394	1.70227	0.760883	0.970276	2.0379	0.760295	1.04407	0.638102	0.862017	1.01641	1.25591	1.50601	1.23829	0.834912	0.777624	1.09527	1.34415	0.745438	0.751904	1.02395	0.578887	0.734855	1.38616	1.52118	1.89731	0.912733	0.596976	0.797282	1.65799
	11.4295	1.82184	0.951541	1.22682	1.15812	1.93655	1.87187	1.08422	1.53932	1.02895	1.03726	0.822076	0.557383	1.96249	0.708202	0.63625	1.60265	0.81713	0.998298	1.93191	1.34565	1.66786	0.729929	0.933835	1.94598	0.751006	1.09434	0.624614	0.853985	1.08779	1.27335	1.46322	1.28465	0.811218	0.763541	1.04601	1.31174	0.767262	0.715647	1.04683	0.596417	0.75417	1.3542	1.65609	2.05217	0.981414	0.606548	0.906076	1.86056
	11.4628	1.80086	0.971549	1.25918	1.16195	1.97517	2.10429	1.14859	1.69043	1.04418	0.956432	0.834871	0.554539	1.93838	0.692063	0.703594	1.73495	0.832617	0.96916	1.98947	1.4047	1.79696	0.716538	0.924258	1.84875	0.800693	1.08327	0.62863	0.879818	1.03653	1.25606	1.59783	1.25802	0.832178	0.791575	1.09911	1.41125	0.781243	0.756222	1.00931	0.553032	0.785387	1.3757	1.53749	1.86999	1.00034	0.634594	0.884326	1.71067
	11.4962	1.71885	0.957412	1.24146	1.14052	2.09043	1.95265	1.19432	1.48116	1.03178	1.02779	0.808771	0.574515	1.97181	0.720216	0.659854	1.71167	0.81802	0.959519	1.91088	1.34322	1.87882	0.767423	0.908141	2.00645	0.756467	1.01873	0.64295	0.926912	1.02272	1.27126	1.51867	1.31374	0.807273	0.802932	1.14533	1.31209	0.759023	0.716803	1.10332	0.538196	0.820513	1.24252	1.47027	1.99504	0.986848	0.703721	0.843599	1.84234
	11.5295	1.77294	0.953338	1.22478	1.16991	1.97693	1.99765	1.16078	1.47567	0.994691	0.960664	0.85589	0.56821	1.93158	0.747622	0.664512	1.7052	0.870492	0.956821	1.84826	1.40098	1.84878	0.804748	0.943084	1.96335	0.718539	1.00172	0.675676	0.8825	1.07312	1.24523	1.45756	1.27593	0.834648	0.832632	1.03977	1.33872	0.766108	0.714051	1.09026	0.554681	0.830953	1.293	1.59411	1.99643	0.98932	0.609655	0.945164	1.87564
	11.5629	1.82526	1.09874	1.23975	1.18667	2.00772	2.03594	1.16709	1.46422	1.00932	0.955633	0.798194	0.543164	1.85065	0.663709	0.697846	1.80575	0.838342	1.02484	1.84823	1.42181	1.76814	0.770022	0.893799	1.94149	0.778381	1.05759	0.645642	0.895082	1.07176	1.28235	1.5438	1.31903	0.771974	0.816391	1.05222	1.28296	0.741646	0.724695	1.0854	0.639862	0.848268	1.31873	1.55455	2.04923	1.04127	0.609512	0.896356	1.72572
	11.5962	1.73667	0.976001	1.19008	1.1413	1.83997	2.01703	1.22767	1.47065	0.990604	0.954495	0.805969	0.571257	1.89017	0.76112	0.682118	1.75828	0.839353	0.996488	1.90741	1.4223	1.83413	0.793428	0.874529	1.91085	0.71701	1.02642	0.646184	0.887194	1.00221	1.2787	1.46261	1.34251	0.789459	0.782016	1.06648	1.26571	0.757533	0.779432	1.11282	0.550638	0.832307	1.39114	1.54504	1.93718	1.03669	0.614082	0.938532	1.70906
	11.6295	1.71059	0.969385	1.23894	1.10993	1.88238	2.00897	1.18481	1.50802	1.00825	0.947773	0.816363	0.577104	1.93191	0.753998	0.743901	1.78431	0.825064	1.00135	1.9268	1.33724	1.77028	0.765454	0.89007	1.94012	0.716613	1.04909	0.631699	0.926463	1.01255	1.25168	1.4587	1.31787	0.759505	0.797788	1.03169	1.31834	0.721527	0.758117	1.05031	0.533777	0.861406	1.22852	1.59025	2.08291	1.04777	0.690631	0.937225	1.84585
	11.6629	1.72061	1.04657	1.3183	1.17792	2.07789	1.95949	1.06408	1.50326	1.02982	0.995863	0.857385	0.630861	1.84059	0.726702	0.710706	1.77178	0.782812	0.966593	1.8888	1.32112	1.89276	0.767435	0.851091	1.90591	0.777497	1.07214	0.641847	0.875632	1.03341	1.34948	1.55051	1.33174	0.817555	0.790899	1.06575	1.26194	0.810624	0.772628	1.07864	0.631828	0.842969	1.30868	1.59242	1.75427	1.09511	0.717636	0.893423	1.85054
	11.6962	1.78761	0.985823	1.38456	1.20161	2.11309	1.99204	1.06804	1.65809	1.03152	1.0411	0.808747	0.671973	1.95997	0.725557	0.763173	1.92751	0.828554	0.997479	1.96042	1.3002	1.95203	0.725858	0.840765	2.02208	0.74532	1.13306	0.655562	0.84299	1.09409	1.23388	1.46961	1.40532	0.827574	0.774789	1.11596	1.32083	0.739361	0.784201	1.08497	0.558447	0.87032	1.41554	1.74251	1.98215	1.05908	0.645095	0.92246	1.6679
	11.7295	1.87418	1.01159	1.32348	1.22075	1.99573	1.96108	1.13499	1.61565	1.04367	0.957343	0.842135	0.618944	1.95799	0.750034	0.68903	1.82874	0.81915	1.05687	1.89165	1.42277	1.68887	0.783653	0.847417	1.88998	0.777783	1.0554	0.648287	0.819355	1.09096	1.2591	1.42313	1.37497	0.814867	0.782407	1.11382	1.3532	0.775255	0.783796	1.076	0.615845	0.854944	1.20994	1.64394	1.85585	1.10199	0.67476	0.906081	1.82134
	11.7629	1.78357	1.01156	1.30249	1.147	2.09937	1.98267	1.03491	1.55003	1.04492	0.97939	0.797773	0.655253	2.01596	0.734022	0.736428	1.78861	0.843881	1.02456	1.78449	1.32614	1.93338	0.758914	0.875465	1.93688	0.682432	1.02252	0.65048	0.846744	1.04234	1.34651	1.45498	1.38274	0.815585	0.84899	1.09628	1.38042	0.787671	0.738238	1.07031	0.623118	0.855761	1.21877	1.62115	1.82203	1.07112	0.693457	0.938118	1.68927
	11.7962	1.78685	1.02044	1.363	1.16293	1.90759	2.09031	1.06745	1.51321	1.06209	0.959574	0.785287	0.65355	1.88836	0.732845	0.683173	1.90873	0.887456	1.01112	1.80312	1.35265	1.89527	0.803176	0.905837	1.79205	0.70953	1.04593	0.646127	0.845092	1.05483	1.31398	1.48392	1.39593	0.800357	0.833989	1.11555	1.38111	0.808205	0.720135	1.10621	0.55682	0.841382	1.30673	1.58345	1.86377	1.07008	0.605635	0.868976	1.81744
	11.8295	1.76191	1.01834	1.35728	1.19693	2.14756	1.95597	1.06751	1.61542	1.02695	0.922729	0.823382	0.649431	1.97285	0.701762	0.731111	1.81391	0.800965	1.12664	1.80008	1.37834	1.93037	0.745749	0.827192	1.88462	0.681133	1.12156	0.662708	0.846686	1.07044	1.27744	1.4799	1.39764	0.83318	0.882862	1.01407	1.31272	0.763762	0.752508	1.10518	0.547236	0.893498	1.18024	1.74152	1.89468	1.08628	0.675444	0.90789	1.72683
	11.8629	1.74886	1.00471	1.33845	1.17824	1.98923	1.98133	1.09248	1.60786	1.02295	0.893046	0.834572	0.633502	1.80513	0.690015	0.758213	1.96325	0.796693	1.06832	1.73596	1.35366	1.84861	0.844941	0.871832	1.9655	0.718676	1.09571	0.662581	0.783709	1.00568	1.27652	1.4328	1.45555	0.798632	0.78628	1.10445	1.31125	0.751487	0.800211	1.17957	0.574069	0.89283	1.20748	1.633	2.01617	1.02474	0.698608	0.990811	1.84729
	11.8962	1.77384	1.0104	1.36246	1.2092	1.86489	1.98587	1.09353	1.59222	1.02196	0.901583	0.807867	0.663516	1.93791	0.738475	0.713942	1.65225	0.791357	1.12848	1.76061	1.25552	1.7732	0.78216	0.804066	1.88965	0.734381	1.08205	0.667149	0.788755	1.01517	1.26152	1.40293	1.46072	0.785655	0.849659	1.07339	1.37937	0.779514	0.810802	1.16023	0.597411	0.927621	1.19547	1.68917	1.86543	1.12054	0.642897	0.90308	1.91868
	11.9295	1.72631	1.00596	1.43075	1.20275	1.94858	2.00228	1.04656	1.59886	1.0027	0.978133	0.780098	0.60493	1.91299	0.727346	0.745342	1.82907	0.849285	1.09161	1.83556	1.23373	1.87942	0.810239	0.79111	1.89695	0.737557	1.04596	0.687373	0.845769	1.09237	1.30702	1.32471	1.44756	0.821552	0.813393	1.08296	1.33193	0.73508	0.846707	1.16048	0.587704	0.825397	1.2639	1.56468	1.83056	1.11662	0.682206	0.988083	1.76688
	11.9629	1.69594	0.981458	1.36884	1.20638	2.16168	1.96681	1.05481	1.60592	0.999844	0.961209	0.791273	0.61214	1.89228	0.702626	0.749689	1.88894	0.845497	1.10044	1.86592	1.36887	1.684	0.760441	0.852543	1.97312	0.68127	1.06109	0.673405	0.738235	1.05328	1.36911	1.45726	1.51669	0.862637	0.800276	1.03151	1.34771	0.741018	0.774777	1.12527	0.576634	0.93853	1.24296	1.68212	2.01572	1.11653	0.787255	0.953854	1.83451
	11.9962	1.82457	1.0782	1.35528	1.20656	1.99911	1.95636	1.09496	1.65052	1.01872	0.962605	0.791522	0.610627	1.87005	0.724019	0.789054	1.82744	0.81995	1.03716	1.71614	1.35413	1.94912	0.751238	0.870264	2.00376	0.687604	1.08355	0.656547	0.77572	1.06046	1.34981	1.42309	1.47835	0.861134	0.895168	1.06108	1.3141	0.7583	0.819055	1.1253	0.587883	0.94337	1.36572	1.55894	1.99576	1.21355	0.762476	0.970558	1.72639
	12.0295	1.75866	1.0177	1.42369	1.14806	1.98315	1.93248	1.01354	1.58311	1.01693	0.937437	0.81983	0.670599	1.81326	0.737371	0.70521	1.80682	0.827419	1.06008	1.78109	1.34302	1.62885	0.808497	0.844186	1.95638	0.703937	1.08093	0.666365	0.791892	1.05219	1.24857	1.43351	1.52366	0.843036	0.838697	1.03463	1.31916	0.80086	0.799266	1.1177	0.560896	0.959405	1.27543	1.7271	1.80118	1.2213	0.703924	0.91665	1.80373
	12.0629	1.69752	1.02978	1.49015	1.21185	2.01574	1.89643	1.0381	1.60163	1.01877	0.897479	0.804838	0.587975	1.74178	0.723097	0.722769	1.9209	0.825116	1.04973	1.85548	1.28978	2.08192	0.7138	0.814233	2.02338	0.733467	0.973164	0.706905	0.762509	1.0989	1.35002	1.39073	1.47105	0.773967	0.837113	1.02984	1.18129	0.814085	0.807125	1.15117	0.549036	0.928058	1.30276	1.73308	1.80855	1.18396	0.71518	0.919361	1.72697
	12.0962	1.6664	1.01069	1.45003	1.14831	2.04056	1.96797	0.992327	1.67326	1.00978	0.904623	0.789219	0.640969	1.91952	0.679494	0.72215	1.80685	0.781758	1.03819	1.87899	1.29973	1.84323	0.777651	0.849645	1.828	0.695108	1.02527	0.660552	0.769097	1.12642	1.25876	1.42402	1.48817	0.853378	0.91026	1.01761	1.35578	0.782207	0.82066	1.12366	0.561434	0.983202	1.16867	1.58355	1.77314	1.26436	0.731536	0.993611	1.67391
	12.1295	1.68356	1.06795	1.42724	1.24717	2.00585	2.08547	1.03001	1.58634	1.00122	0.942263	0.86862	0.707813	1.76153	0.736833	0.741253	1.79035	0.813195	1.0249	1.82207	1.20496	1.76977	0.85692	0.871906	1.91473	0.66357	1.03948	0.688484	0.733749	1.10234	1.26676	1.49965	1.50257	0.822331	0.887136	1.04469	1.31273	0.786249	0.839103	1.11001	0.571887	0.979526	1.19913	1.81022	1.88027	1.24414	0.717311	0.937618	1.71973
	12.1629	1.71482	1.08048	1.47748	1.17914	1.99168	2.06313	1.06414	1.56676	1.02962	0.937145	0.791919	0.691303	1.95456	0.729191	0.704716	1.79705	0.926189	1.05459	1.78914	1.38167	1.65784	0.781764	0.835073	1.8947	0.715419	1.08879	0.698954	0.817343	1.09856	1.24399	1.49829	1.58793	0.811837	0.910816	1.04848	1.34251	0.804252	0.814284	1.11678	0.551352	0.993857	1.29049	1.65911	1.86919	1.30507	0.717711	1.04711	1.81629
	12.1962	1.80845	1.06181	1.49542	1.23681	2.09066	2.02231	0.99465	1.73966	0.956708	0.905658	0.759242	0.689547	1.84824	0.724345	0.768839	1.80414	0.849352	0.989437	1.83815	1.43062	1.82383	0.800168	0.796966	1.93835	0.755857	1.09527	0.66189	0.776327	1.15432	1.31938	1.36249	1.53272	0.769514	0.88261	0.994264	1.32566	0.772579	0.798138	1.09634	0.528665	0.922226	1.24435	1.74358	1.8735	1.28878	0.763099	1.00133	1.77313
	12.2295	1.72868	1.09541	1.48771	1.2288	1.95079	1.97045	1.01583	1.62048	0.998484	0.896937	0.781212	0.586151	1.97311	0.715366	0.719679	1.75496	0.811538	1.06136	1.84421	1.37857	1.89844	0.863958	0.825338	1.95907	0.684593	1.13666	0.677191	0.801825	1.1117	1.30996	1.43752	1.48799	0.786208	0.92287	1.05428	1.352	0.84774	0.779259	1.08593	0.582063	0.956275	1.27044	1.59028	1.93509	1.22766	0.793956	1.05558	1.71856
	12.2628	1.76857	1.06019	1.45054	1.25018	1.91898	2.00201	1.02429	1.71358	0.969859	0.916954	0.84184	0.68588	1.77875	0.713783	0.721061	1.85631	0.82096	0.983383	1.95286	1.23871	1.97009	0.907365	0.777149	1.98048	0.697842	1.05489	0.701662	0.827262	1.11529	1.3074	1.37927	1.46697	0.828619	0.894043	1.05557	1.31193	0.785381	0.781467	1.11427	0.58963	1.00694	1.20927	1.59788	1.87392	1.28713	0.753481	1.07474	1.80929
	12.2962	1.83809	1.02334	1.5124	1.18483	1.92424	1.94203	1.03678	1.6105	0.988769	0.923668	0.75578	0.638605	1.81099	0.743616	0.742856	1.74249	0.819073	0.992381	1.90502	1.25641	1.7609	0.862041	0.745999	1.91481	0.725451	1.10711	0.672903	0.870621	1.0851	1.31701	1.40724	1.5121	0.752586	0.913619	1.04862	1.27083	0.764051	0.778953	0.987959	0.561795	0.995476	1.11481	1.49739	1.92172	1.28539	0.69709	0.964596	1.74586
	12.3295	1.77499	1.04641	1.48542	1.26578	2.02033	1.87258	0.987437	1.63216	0.930725	0.903221	0.753215	0.677153	1.82091	0.7393	0.676148	1.87962	0.81274	1.01751	1.79961	1.30432	1.76934	0.866441	0.785553	1.91713	0.708603	1.07082	0.7144	0.804385	1.10082	1.22758	1.32819	1.44654	0.815453	0.896839	0.977086	1.33478	0.758086	0.793559	1.1225	0.561716	0.99864	1.24007	1.60025	1.72743	1.26145	0.708358	0.995981	1.76364
	12.3629	1.74513	1.06109	1.52407	1.21778	1.86311	2.01596	0.988912	1.6466	0.991685	0.876275	0.792017	0.652852	1.83242	0.71309	0.652453	1.88442	0.786532	1.01807	1.97947	1.30458	1.80909	0.775594	0.758106	1.88423	0.693994	1.05002	0.700525	0.832567	1.13691	1.33634	1.29451	1.44359	0.837298	0.900195	0.987018	1.26614	0.763732	0.83138	1.13142	0.643688	1.08598	1.24686	1.52716	1.88175	1.30718	0.743883	0.913001	1.84361
	12.3962	1.66221	0.979004	1.52405	1.1846	1.95047	1.93927	1.09131	1.64321	0.992682	0.91882	0.844119	0.693992	1.876	0.69822	0.766696	1.98591	0.874116	0.994575	1.78723	1.35862	1.59771	0.81802	0.775028	2.01469	0.726968	1.08995	0.736312	0.782411	1.10116	1.23879	1.45308	1.43598	0.795452	0.895915	0.98521	1.30156	0.778264	0.758995	1.17839	0.569562	1.05517	1.28141	1.58134	1.87689	1.38457	0.638265	0.953477	1.66274
	12.4296	1.76562	1.01162	1.48416	1.20239	1.97123	2.05214	1.00534	1.63092	1.02681	0.886257	0.816788	0.665039	1.8812	0.744654	0.700366	1.88606	0.815746	1.01436	1.8121	1.3034	1.71311	0.928704	0.753119	1.98742	0.701477	1.02587	0.762709	0.773532	1.10786	1.25116	1.42533	1.54874	0.783517	0.973952	1.04957	1.21729	0.823702	0.813763	1.10555	0.616969	1.11086	1.24524	1.59839	1.74867	1.35464	0.723084	0.977027	1.86319
	12.4629	1.81032	1.01931	1.53197	1.20847	1.97565	2.0888	1.00387	1.62499	1.06452	0.924108	0.854758	0.650739	1.85894	0.701799	0.716301	1.82523	0.871532	0.990437	1.67248	1.33746	1.75835	0.881956	0.745885	1.98281	0.716736	1.05218	0.724127	0.78083	1.04888	1.29143	1.32922	1.52931	0.790516	0.925147	1.02741	1.25823	0.758028	0.774232	1.17352	0.628475	1.04412	1.1399	1.62624	1.65396	1.37774	0.709779	0.955863	1.68282
	12.4962	1.76318	0.976926	1.5213	1.24104	2.06025	2.02398	0.973185	1.66996	1.01011	0.892159	0.73908	0.707429	1.76195	0.691767	0.730701	1.83526	0.842643	0.989	1.91938	1.30002	1.77405	0.813366	0.712757	1.82022	0.717233	1.02329	0.767447	0.797791	1.10845	1.26702	1.42066	1.4652	0.7744	0.95151	0.948078	1.2849	0.812747	0.72342	1.08146	0.557049	1.07161	1.24827	1.52601	1.94914	1.36364	0.751991	0.952111	1.65933
	12.5295	1.74348	0.964839	1.58925	1.24321	1.81694	1.99648	0.986804	1.65594	1.05844	0.892395	0.790665	0.630429	1.85617	0.677643	0.69824	1.85148	0.796683	0.972224	1.86844	1.31463	1.74628	0.911746	0.773116	1.8173	0.759277	1.03035	0.732802	0.763662	1.0938	1.26943	1.36116	1.47704	0.77026	0.921357	1.05201	1.34494	0.798789	0.786483	1.1427	0.601663	1.07822	1.1033	1.54987	1.79341	1.36333	0.705794	0.886576	1.68786
	12.5629	1.71727	0.939795	1.59891	1.26475	1.95166	2.0379	0.924967	1.71957	1.04516	0.925149	0.775406	0.683398	1.89211	0.669839	0.705562	1.95585	0.773983	0.931779	1.8768	1.34399	1.69753	0.75535	0.766619	1.85757	0.701409	1.02726	0.699203	0.783336	1.04896	1.2642	1.39905	1.40438	0.741843	0.942159	1.02071	1.18909	0.769596	0.704663	1.07973	0.531882	1.06995	1.13436	1.52934	1.76345	1.342	0.787567	0.959281	1.60074
	12.5962	1.67359	0.943702	1.5234	1.20648	1.98783	2.05904	0.92068	1.47162	1.04026	0.879301	0.813285	0.746073	1.79668	0.697531	0.686887	1.78424	0.80777	0.944211	1.61633	1.32388	1.77998	0.875878	0.681525	1.85058	0.751295	0.966759	0.673566	0.816334	1.08421	1.27652	1.40053	1.45403	0.790825	0.976287	0.946954	1.28157	0.776489	0.690601	1.09947	0.541415	1.08055	1.15155	1.51864	1.94195	1.4234	0.743808	0.943954	1.65884
	12.6296	1.71047	0.971003	1.51504	1.24573	2.02472	1.98409	0.983084	1.61484	1.04403	0.864664	0.745264	0.718787	1.83236	0.694004	0.710461	1.90426	0.844967	0.989894	1.7133	1.24189	1.64057	0.790434	0.68346	1.74079	0.694857	1.0324	0.737505	0.789326	1.06468	1.243	1.49249	1.50181	0.762231	0.922562	1.0229	1.356	0.786401	0.745507	1.04194	0.621477	1.02852	1.12749	1.57142	1.84095	1.39812	0.675961	0.936494	1.76025
	12.6629	1.71973	0.947818	1.49838	1.20091	2.04244	2.04832	0.972266	1.64911	1.09821	0.856346	0.760167	0.64326	1.83165	0.694874	0.724399	1.77664	0.950495	1.04278	1.85011	1.23734	1.84976	0.809956	0.727279	2.0134	0.729228	1.0129	0.726671	0.768159	1.07679	1.27249	1.43821	1.5783	0.767208	0.942901	0.970667	1.30318	0.786648	0.783578	1.15249	0.591032	1.03269	1.16009	1.56285	1.72368	1.42671	0.750688	0.914722	1.75632
	12.6962	1.71675	0.957198	1.46629	1.15712	1.88885	1.97288	1.05805	1.61464	1.05401	0.868739	0.746338	0.657558	1.90157	0.702754	0.72646	1.80792	0.889567	0.97105	1.95272	1.23826	1.69332	0.783589	0.722155	1.85268	0.764489	0.964345	0.651472	0.789531	1.06088	1.21215	1.4284	1.45327	0.772597	1.00622	0.953413	1.33635	0.807748	0.74383	1.03825	0.614531	1.04827	1.16884	1.56169	1.92202	1.40335	0.727155	0.922229	1.70021
	12.7295	1.754	0.943973	1.47431	1.17264	1.95959	1.96128	0.938929	1.64181	1.07894	0.85614	0.707231	0.70637	1.86605	0.649008	0.695695	1.8106	0.955954	0.985316	1.65317	1.28885	1.6428	0.751833	0.701372	1.86728	0.7239	1.01836	0.680698	0.739601	1.04059	1.32967	1.42647	1.40182	0.759515	0.944415	1.08205	1.29047	0.815348	0.774628	1.14416	0.632466	0.996565	1.0171	1.55241	1.69252	1.44167	0.705859	0.983284	1.64278
	12.7629	1.79311	0.971843	1.48771	1.17623	1.99303	2.1054	1.08295	1.6321	1.07597	0.861438	0.74149	0.662336	1.90446	0.731767	0.718261	1.77213	0.919588	1.02563	1.88061	1.29052	1.60198	0.865176	0.70906	1.92546	0.72297	1.03881	0.657325	0.802036	1.06553	1.30859	1.50877	1.48992	0.798395	0.943105	0.923639	1.29388	0.800378	0.780132	1.06768	0.560964	1.01211	1.16299	1.44499	1.91209	1.53426	0.691954	0.97573	1.77067
	12.7962	1.71496	0.949962	1.5134	1.11989	1.82506	1.98683	1.02758	1.55595	1.08038	0.837759	0.872015	0.646047	1.84711	0.641911	0.713077	1.77175	0.928602	0.982522	1.79259	1.23803	1.57167	0.768312	0.686498	1.8106	0.723295	0.992076	0.673688	0.747533	1.03437	1.14963	1.39178	1.42328	0.766221	0.970973	0.96339	1.21923	0.734605	0.745196	1.07529	0.59411	0.974874	1.02016	1.42311	1.62681	1.42591	0.731275	0.974242	1.65654
	12.8296	1.73764	0.905897	1.47226	1.16821	1.92786	1.99399	1.00934	1.47426	1.06505	0.892149	0.758452	0.668586	1.82386	0.629556	0.719417	1.87411	0.940303	0.921163	1.9178	1.26767	1.4824	0.721718	0.698428	1.94788	0.871548	0.983441	0.703465	0.76235	0.97679	1.17037	1.53304	1.45945	0.763166	0.959277	0.945052	1.24646	0.765591	0.760536	1.09969	0.614438	1.05465	1.19215	1.41245	1.88182	1.49845	0.739224	0.915751	1.62989
	12.8629	1.79402	0.956691	1.45097	1.1542	1.97286	2.05793	0.989393	1.59536	1.046	0.865851	0.809002	0.665283	1.84273	0.652688	0.675432	1.91308	0.912861	0.975008	1.81827	1.31868	1.67688	0.803513	0.774691	1.9425	0.693247	1.02878	0.669229	0.764513	1.02882	1.23636	1.50771	1.54906	0.814278	0.931269	1.0714	1.28801	0.827231	0.765344	1.02625	0.584741	1.03923	1.17784	1.43118	1.71393	1.51147	0.759479	0.933698	1.82285
	12.8962	1.75079	0.972524	1.49221	1.16757	1.84817	2.10478	0.979752	1.56428	1.05706	0.863919	0.771358	0.663846	1.99852	0.702455	0.707519	1.67863	0.888788	0.996938	1.72368	1.24522	1.68154	0.789422	0.735799	1.88801	0.743554	1.02778	0.695853	0.79438	1.04303	1.22935	1.54394	1.42831	0.814564	0.960462	1.0249	1.35551	0.795297	0.76284	1.07021	0.557969	1.01769	1.08691	1.38181	1.69027	1.53272	0.730565	0.960298	1.84238
	12.9296	1.79288	0.96896	1.39039	1.11769	1.85262	2.07515	0.963727	1.48749	1.06965	0.90031	0.771758	0.631713	1.73996	0.652692	0.657509	1.72098	0.882752	0.972838	1.89663	1.29737	1.49105	0.688158	0.690481	1.80261	0.690564	0.985826	0.667905	0.799436	1.05423	1.20668	1.41611	1.4937	0.801381	0.950879	0.996575	1.30358	0.816903	0.759354	1.04945	0.601921	1.05978	1.07064	1.48083	1.60067	1.56485	0.792601	0.964411	1.69854
	12.9628	1.82304	1.01771	1.49724	1.17375	1.88058	2.07512	0.984799	1.57276	1.05605	0.901426	0.842946	0.663862	1.77163	0.693131	0.680624	1.81669	0.93402	0.947208	1.89888	1.31796	1.50912	0.730955	0.71503	1.83682	0.755627	0.956088	0.671542	0.795686	1.10444	1.23431	1.49453	1.48225	0.822368	0.993048	0.972936	1.232	0.83115	0.727093	0.914022	0.552374	1.01794	1.20955	1.431	1.633	1.60626	0.84223	0.964547	1.67299
	12.9962	1.84624	0.976083	1.39081	1.05414	2.09217	1.91802	0.916008	1.48416	1.04868	0.896485	0.793592	0.680718	1.80673	0.648553	0.690821	1.77678	0.925365	0.957045	1.69619	1.24169	1.36018	0.745858	0.682226	1.88329	0.731341	0.997194	0.681381	0.80264	1.09157	1.1001	1.35849	1.45661	0.808051	0.937475	1.00071	1.24063	0.770739	0.706004	1.01488	0.528812	1.09068	1.32225	1.40367	1.94955	1.62149	0.835766	0.896941	1.54856
	13.0295	1.76102	0.948894	1.45624	1.046	1.9734	1.89029	0.979111	1.46108	1.0442	0.794797	0.757661	0.688552	1.75683	0.616508	0.646855	1.65463	0.903259	0.945138	1.96696	1.24075	1.37601	0.810114	0.672594	1.84499	0.769493	1.02652	0.638235	0.783773	1.13169	1.23151	1.4622	1.41994	0.767204	1.02375	1.04088	1.2259	0.775761	0.706804	0.956253	0.557941	1.05954	1.19336	1.38677	1.75929	1.6025	0.707108	0.963761	1.57426
	13.0629	1.78893	1.01609	1.37959	1.09025	1.88843	1.95042	0.915733	1.49323	1.02139	0.843321	0.711853	0.602935	1.80197	0.609888	0.693169	1.68423	0.870703	0.871764	1.78549	1.30241	1.37242	0.764655	0.647177	1.85604	0.806322	1.03899	0.655363	0.770994	1.08577	1.27686	1.3359	1.48103	0.778381	0.993244	0.993362	1.20905	0.835782	0.72447	0.925265	0.589238	1.05843	1.12515	1.43152	1.73561	1.59654	0.799421	0.961429	1.72214
	13.0962	1.71636	0.94642	1.4538	1.03139	2.01426	1.85982	0.975159	1.45129	1.08845	0.764021	0.797585	0.673179	1.80466	0.651781	0.629149	1.65888	0.871239	0.965907	1.85474	1.1756	1.60116	0.664087	0.704761	1.86085	0.786855	0.98078	0.669686	0.776866	1.0831	1.17142	1.44369	1.4448	0.726724	1.01765	1.0621	1.13453	0.81538	0.679476	0.969469	0.574104	1.00643	1.11225	1.3823	1.67635	1.53093	0.837723	0.908824	1.65901
	13.1296	1.73904	0.966342	1.39744	1.04936	1.98947	1.94285	0.925779	1.50751	1.06668	0.806996	0.770787	0.614901	1.7956	0.607812	0.668665	1.66128	0.856804	0.909386	1.79273	1.1937	1.39092	0.725448	0.663102	1.89186	0.720943	0.967928	0.6826	0.729372	1.14249	1.18796	1.44975	1.42731	0.728864	1.06104	1.12799	1.19622	0.827645	0.691723	0.973228	0.592141	1.00463	1.15604	1.35591	1.544	1.59879	0.749135	0.962472	1.638
	13.1629	1.65635	0.970678	1.40178	1.01825	1.86149	1.80616	0.979387	1.49175	1.06014	0.732525	0.691521	0.706234	1.7729	0.597614	0.638958	1.70888	0.809025	0.863556	1.65252	1.18386	1.46021	0.672324	0.639166	1.77791	0.707355	0.966807	0.666644	0.744556	1.22941	1.11528	1.29534	1.45914	0.729691	0.983691	0.993898	1.21189	0.833198	0.668549	0.928567	0.626411	1.03504	1.14597	1.39874	1.49273	1.61949	0.690568	0.989549	1.57295
	13.1962	1.70169	0.951485	1.36818	0.965112	1.8595	1.75389	0.864664	1.48003	1.03707	0.779366	0.727044	0.658028	1.73926	0.589087	0.664522	1.70278	0.850615	0.911111	1.76407	1.21898	1.48472	0.766423	0.619556	1.79824	0.76377	1.0004	0.643487	0.752024	1.11939	1.17116	1.28603	1.41726	0.749378	0.908023	0.977855	1.23947	0.817378	0.706766	0.967991	0.595335	1.01238	1.13037	1.23763	1.48937	1.55116	0.653274	0.922789	1.47901
	13.2295	1.69611	0.943637	1.36654	0.948213	1.93009	1.73714	0.884866	1.62707	0.990271	0.725531	0.758426	0.650112	1.77247	0.61815	0.664568	1.63119	0.893949	0.837489	1.71882	1.15736	1.24364	0.74215	0.666021	1.73971	0.747664	1.00069	0.612266	0.733152	1.13332	1.1454	1.17759	1.41201	0.722621	0.977416	1.02892	1.2709	0.774597	0.650442	0.824385	0.578194	0.940667	1.07781	1.2627	1.60336	1.61095	0.703383	0.881186	1.50014
	13.2629	1.60841	0.944828	1.31102	1.01922	1.95388	1.65743	0.828927	1.47446	0.97263	0.737694	0.781431	0.609973	1.72071	0.590253	0.612714	1.60681	0.893573	0.840624	1.70866	1.16287	1.34099	0.662621	0.590391	1.71672	0.766143	0.97202	0.690889	0.758598	1.08453	1.13825	1.24973	1.38359	0.705339	1.01804	0.992014	1.35657	0.769593	0.694681	0.906557	0.610432	0.97845	1.00444	1.25937	1.52029	1.4701	0.665698	0.88463	1.51713
	13.2962	1.60476	0.967906	1.3066	0.947217	1.83969	1.6199	0.863168	1.53713	0.963682	0.69817	0.651703	0.615371	1.63009	0.596528	0.6345	1.59145	0.855918	0.808651	1.48853	1.18074	1.62412	0.595787	0.637657	1.61845	0.777633	0.896453	0.635552	0.727048	1.19807	1.153	1.27357	1.43916	0.761444	0.97111	0.959318	1.34858	0.802548	0.68894	0.844252	0.626151	1.02181	0.992061	1.14994	1.66714	1.46862	0.709211	0.895369	1.50886
	13.3295	1.57505	0.916843	1.28449	0.974897	1.73481	1.59825	0.844412	1.47675	0.963832	0.680477	0.705666	0.637325	1.6439	0.615678	0.611844	1.54246	0.868021	0.808403	1.43388	1.09167	1.27473	0.713076	0.607952	1.70009	0.730756	0.91167	0.629784	0.707514	1.14985	1.08563	1.26006	1.38111	0.668698	0.914228	0.91805	1.46122	0.806967	0.64691	0.886367	0.683913	0.909338	0.890587	1.18702	1.47459	1.45688	0.724455	0.897526	1.40159
	13.3629	1.54358	0.914437	1.20697	0.940716	1.87655	1.48824	0.782662	1.47127	0.987339	0.676909	0.701083	0.621469	1.77776	0.634028	0.657472	1.63244	0.907156	0.788826	1.57127	1.11184	1.41307	0.698597	0.608577	1.62973	0.70724	0.925985	0.639911	0.677717	1.24127	1.02986	1.23045	1.41648	0.695243	0.958229	0.886242	1.47622	0.784197	0.656635	0.874937	0.662739	0.972295	0.885826	1.17516	1.36917	1.43086	0.681812	0.852695	1.45945
	13.3962	1.46481	0.915321	1.24192	0.896929	1.74272	1.5791	0.837292	1.47735	0.916036	0.668379	0.647668	0.691595	1.55691	0.628928	0.641212	1.59693	0.819531	0.851212	1.38046	1.10547	1.35335	0.64459	0.581726	1.50864	0.748556	0.886466	0.649325	0.714163	1.22967	1.11574	1.16436	1.35774	0.687624	0.953644	0.926321	1.50825	0.723478	0.656556	0.879651	0.608058	0.908614	0.949836	1.08681	1.42581	1.46677	0.684077	0.848334	1.5171
	13.4295	1.56309	0.916822	1.17522	0.886336	1.7712	1.50278	0.780487	1.46675	0.939755	0.677473	0.654092	0.65424	1.45732	0.567701	0.621552	1.60727	0.821366	0.870782	1.54757	1.10771	1.35668	0.707838	0.608467	1.60726	0.71965	0.878239	0.697771	0.67463	1.23644	1.12504	1.1721	1.32028	0.696087	0.918081	0.909994	1.58878	0.684849	0.628707	0.817743	0.646401	1.01071	0.928643	1.04818	1.2432	1.41826	0.65972	0.777264	1.3714
	13.4629	1.5269	0.866459	1.14979	0.964465	1.76164	1.42511	0.741453	1.39147	0.916656	0.684664	0.656059	0.612867	1.49615	0.602111	0.570468	1.63058	0.789315	0.804161	1.34845	1.03277	1.23862	0.686351	0.553804	1.54497	0.752873	0.873772	0.614437	0.652765	1.17157	1.106	1.07184	1.28902	0.671018	0.95717	0.857538	1.57835	0.736297	0.667265	0.827265	0.720014	0.953716	0.946078	0.974155	1.42988	1.4442	0.739828	0.820702	1.32439
	13.4962	1.47544	0.878222	1.11344	0.927454	1.83013	1.4473	0.758554	1.48882	0.911268	0.638797	0.641124	0.664965	1.4782	0.589389	0.60918	1.57165	0.835099	0.79206	1.45486	1.00522	1.38708	0.627184	0.568389	1.50291	0.746482	0.8703	0.671076	0.666481	1.21384	1.07614	1.0313	1.32273	0.678558	0.98579	0.85108	1.62027	0.734506	0.654746	0.84677	0.655859	0.956649	0.93166	1.07382	1.21303	1.34436	0.627964	0.823519	1.3585
	13.5296	1.49279	0.883687	1.07109	0.858641	1.66226	1.34615	0.714891	1.44318	0.874914	0.647092	0.62094	0.678865	1.50584	0.606674	0.60648	1.60263	0.765785	0.804892	1.34269	0.969288	1.27293	0.632717	0.584999	1.45064	0.723247	0.814282	0.680118	0.660657	1.27863	1.03412	1.07173	1.40669	0.690927	0.977668	0.848027	1.71074	0.732502	0.630479	0.773105	0.662329	0.931772	0.86798	0.968318	1.27505	1.33645	0.639688	0.817547	1.34661
	13.5628	1.41434	0.850866	1.1134	0.843174	1.76147	1.36356	0.693169	1.35911	0.846641	0.602587	0.608697	0.622024	1.41863	0.599688	0.59418	1.62359	0.767612	0.699664	1.26376	0.977799	1.31195	0.645365	0.530405	1.44192	0.782234	0.82414	0.659762	0.694837	1.23131	1.03631	1.03725	1.26668	0.659302	0.918468	0.796905	1.65753	0.729402	0.598606	0.850647	0.704379	0.861548	0.873078	0.968277	1.30733	1.35834	0.716486	0.78013	1.34557
	13.5962	1.42825	0.872816	1.09014	0.804674	1.7658	1.42109	0.722679	1.33142	0.883153	0.603108	0.677922	0.626242	1.45086	0.605919	0.621423	1.56662	0.845007	0.75567	1.3145	1.03686	1.17291	0.731575	0.518236	1.41455	0.710885	0.846976	0.641595	0.640288	1.27743	1.04531	0.9681	1.32553	0.663364	0.961375	0.79592	1.52467	0.754459	0.628992	0.780416	0.655718	0.867939	0.947144	0.989092	1.47381	1.25047	0.672282	0.802821	1.37821
	13.6295	1.38573	0.824964	1.04784	0.849349	1.6548	1.33096	0.691812	1.42401	0.838439	0.618283	0.565637	0.639248	1.42594	0.598627	0.616181	1.58069	0.819396	0.734694	1.29264	0.932913	1.14621	0.71559	0.519636	1.49216	0.729813	0.856185	0.669488	0.630127	1.21664	1.04076	0.991632	1.24407	0.679629	0.945271	0.826088	1.67965	0.693301	0.608571	0.81953	0.658434	0.899839	0.823777	0.954592	1.32166	1.2561	0.597318	0.764788	1.38034
	13.6629	1.37086	0.810995	0.992129	0.784767	1.58309	1.30451	0.683704	1.33316	0.811301	0.601973	0.574682	0.5624	1.47945	0.580432	0.585782	1.60537	0.835736	0.712685	1.36361	0.968246	1.31698	0.670677	0.560759	1.33852	0.762636	0.823312	0.665083	0.629877	1.31343	1.03076	0.981183	1.26039	0.621479	0.913777	0.764295	1.67681	0.68581	0.631685	0.747563	0.675592	0.883178	0.818648	0.897143	1.20047	1.20877	0.573986	0.739572	1.23512
	13.6962	1.33722	0.771922	0.994693	0.794814	1.50291	1.29747	0.669911	1.44167	0.81035	0.632986	0.622041	0.700146	1.349	0.582205	0.671111	1.51234	0.846357	0.71387	1.34762	1.03537	1.08424	0.641758	0.51208	1.39594	0.731145	0.81245	0.65451	0.597878	1.37958	0.97053	0.966691	1.23519	0.630442	1.01857	0.767606	1.72043	0.692383	0.633038	0.777499	0.712631	0.846049	0.784034	0.87384	1.17626	1.25521	0.586985	0.755499	1.21118
	13.7295	1.41281	0.768694	0.943658	0.786218	1.71893	1.31943	0.642872	1.31031	0.790382	0.578115	0.622106	0.6046	1.36962	0.583369	0.577549	1.40376	0.842155	0.735794	1.33615	0.972416	1.29693	0.619187	0.545501	1.34121	0.723687	0.757039	0.637372	0.570761	1.34905	0.945011	0.981624	1.16259	0.649267	0.960908	0.762854	1.81823	0.651687	0.61921	0.731521	0.678877	0.86338	0.755906	0.940139	1.24633	1.26508	0.643588	0.73935	1.22684
	13.7628	1.36978	0.768224	0.962821	0.769565	1.68728	1.33261	0.640404	1.33705	0.808988	0.621608	0.583339	0.616008	1.29037	0.547334	0.554563	1.55495	0.790488	0.746718	1.39202	0.97257	1.24698	0.642862	0.49737	1.2856	0.754779	0.779344	0.668905	0.579385	1.21906	1.01562	0.958716	1.15865	0.630477	0.94302	0.761506	1.63448	0.697079	0.574211	0.716695	0.695131	0.865607	0.856565	0.842129	1.40551	1.13647	0.57144	0.710757	1.22798
	13.7962	1.29042	0.782222	0.91166	0.762882	1.58898	1.27453	0.644231	1.28845	0.759578	0.585818	0.609855	0.627863	1.3596	0.578417	0.615807	1.51458	0.790004	0.709356	1.28177	0.938068	1.16942	0.672745	0.497899	1.33592	0.665303	0.767284	0.642471	0.534994	1.40036	0.989594	1.00665	1.11502	0.661154	0.968998	0.7556	1.66845	0.648823	0.629281	0.734357	0.725687	0.880587	0.85618	0.860603	1.24501	1.13726	0.538188	0.710649	1.24892
	13.8295	1.32268	0.770437	0.927484	0.762346	1.56883	1.27819	0.632069	1.26112	0.790079	0.626133	0.527436	0.65061	1.34079	0.598978	0.581992	1.55532	0.772877	0.73096	1.25303	0.931348	1.17695	0.703063	0.537435	1.26756	0.653796	0.780249	0.628776	0.576194	1.33636	0.910395	1.01535	1.1459	0.635066	0.94177	0.736418	1.73619	0.637808	0.575145	0.712948	0.691095	0.84113	0.819805	0.835206	1.11788	1.11205	0.598536	0.753648	1.14513
	13.8629	1.27715	0.768385	0.917295	0.695201	1.57352	1.18121	0.619868	1.36048	0.774039	0.615995	0.585532	0.620492	1.34148	0.583675	0.584877	1.49148	0.82929	0.718236	1.26681	0.929899	1.23964	0.705378	0.506101	1.29221	0.662418	0.755407	0.60396	0.553017	1.37041	1.01098	0.968506	1.18067	0.621671	0.940123	0.727541	1.61763	0.633098	0.559729	0.684576	0.680377	0.827169	0.817204	0.816834	1.07189	1.11876	0.574037	0.685467	1.14583
	13.8962	1.31649	0.73838	0.921097	0.747695	1.5308	1.21917	0.612432	1.26898	0.72848	0.59326	0.56601	0.61308	1.30717	0.548653	0.56384	1.52447	0.792077	0.710636	1.26744	0.920685	1.1684	0.632421	0.507458	1.30181	0.692237	0.778919	0.625387	0.551884	1.34972	1.00025	0.871888	1.10781	0.63904	0.909609	0.672379	1.64087	0.621026	0.595149	0.725311	0.694112	0.845088	0.716885	0.812062	1.14307	1.05231	0.580209	0.673538	1.12628
	13.9295	1.25971	0.722879	0.879922	0.709064	1.52276	1.15031	0.581868	1.22286	0.740897	0.606615	0.552424	0.55688	1.28892	0.552392	0.61243	1.43033	0.786902	0.709575	1.28334	0.848717	1.12303	0.646105	0.509634	1.24038	0.663865	0.754729	0.598133	0.550279	1.37077	0.975263	0.906291	1.10132	0.605309	0.995091	0.680357	1.5146	0.620534	0.566273	0.728787	0.669548	0.758007	0.728782	0.825163	1.1695	1.04197	0.566969	0.63913	1.0991
	13.9628	1.25872	0.756994	0.856727	0.682435	1.54549	1.24572	0.65201	1.24496	0.737674	0.587915	0.547608	0.659923	1.30795	0.560001	0.598522	1.4346	0.755806	0.691097	1.25992	0.929472	1.21181	0.654435	0.510887	1.26446	0.654033	0.781969	0.595802	0.519067	1.32072	0.934513	0.887442	1.01147	0.62179	1.00582	0.691497	1.59998	0.612573	0.64216	0.712933	0.660971	0.768402	0.791896	0.819502	1.21292	1.02636	0.588091	0.742962	1.10901
	13.9962	1.19913	0.742245	0.845376	0.711439	1.54907	1.1777	0.64951	1.24962	0.69234	0.628745	0.509229	0.633104	1.29451	0.534722	0.564411	1.37554	0.814163	0.676348	1.26473	0.839862	1.20748	0.661656	0.523019	1.2861	0.630767	0.725957	0.613827	0.52909	1.39352	0.943688	0.879735	1.06699	0.595583	0.889386	0.702861	1.54536	0.600528	0.636556	0.696869	0.618572	0.725446	0.77009	0.869729	1.14491	1.07329	0.63788	0.713846	1.04929
	14.0296	1.26622	0.674829	0.835073	0.686139	1.53337	1.19195	0.547479	1.22966	0.706413	0.571	0.540463	0.657315	1.22337	0.569424	0.59954	1.33433	0.800495	0.655709	1.13402	0.797762	1.22136	0.586134	0.526824	1.23688	0.667801	0.723742	0.579325	0.550202	1.37566	0.972423	0.875311	1.05956	0.614188	0.925549	0.658369	1.51449	0.586313	0.623325	0.71403	0.653895	0.73183	0.760197	0.834184	1.13526	0.971012	0.62014	0.666021	1.16603
	14.0629	1.29273	0.682995	0.815008	0.660925	1.48941	1.14949	0.595012	1.19003	0.69289	0.542038	0.525003	0.601411	1.27255	0.543099	0.573919	1.34457	0.807228	0.677435	1.10922	0.863929	1.13942	0.574619	0.493813	1.23473	0.601087	0.727476	0.598917	0.52303	1.36205	0.919168	0.898224	1.02057	0.606291	0.972792	0.638914	1.3471	0.608498	0.595673	0.650193	0.610681	0.739508	0.762884	0.819207	1.05806	1.02236	0.563783	0.693567	1.12754
	14.0962	1.22592	0.669921	0.8314	0.657975	1.5331	1.11159	0.631723	1.25968	0.698672	0.587946	0.564379	0.624006	1.20595	0.541028	0.57194	1.33486	0.746568	0.668264	1.2106	0.815344	1.23228	0.602785	0.485231	1.18228	0.617628	0.730098	0.606096	0.525244	1.43285	0.94443	0.803012	1.04785	0.569557	0.908881	0.690483	1.41712	0.604869	0.63642	0.667599	0.68192	0.732678	0.767848	0.784184	1.24651	0.92873	0.635662	0.715717	1.14952
	14.1295	1.23787	0.635555	0.822538	0.663131	1.53002	1.09263	0.630269	1.18988	0.66634	0.581026	0.550383	0.634817	1.23475	0.567637	0.579835	1.37534	0.810383	0.652982	1.11229	0.801262	1.27673	0.554584	0.481748	1.1738	0.636804	0.682462	0.588732	0.530377	1.48518	0.876998	0.914901	0.980315	0.620169	0.888585	0.653106	1.52081	0.609997	0.627254	0.618778	0.658299	0.697047	0.728061	0.70993	1.11704	0.994849	0.55186	0.729943	1.03636
	14.1629	1.20025	0.668841	0.783419	0.684228	1.58651	1.1133	0.616462	1.295	0.68773	0.586333	0.516147	0.703353	1.21969	0.529084	0.578862	1.36325	0.755009	0.663185	1.03418	0.783151	1.21532	0.726809	0.493381	1.25277	0.648931	0.713871	0.603857	0.535266	1.49169	0.894465	0.849836	1.05337	0.616596	0.905298	0.65561	1.53434	0.588971	0.605799	0.670421	0.666192	0.76117	0.717107	0.760945	1.08903	0.960065	0.511045	0.656635	1.07733
	14.1962	1.26484	0.655378	0.820579	0.656137	1.51694	1.05286	0.636945	1.19311	0.710075	0.576518	0.503082	0.599179	1.28926	0.552208	0.588094	1.31648	0.767643	0.660276	1.13334	0.801633	1.252	0.573389	0.497916	1.22984	0.681213	0.739327	0.605849	0.523384	1.43853	0.828352	0.875055	1.03662	0.610753	0.906376	0.646525	1.46179	0.589995	0.637052	0.652622	0.642253	0.708942	0.67044	0.778784	1.17822	0.922445	0.518468	0.650803	1.09998
	14.2295	1.22236	0.639536	0.801477	0.632246	1.59552	1.08626	0.619663	1.2186	0.700272	0.574349	0.496412	0.57096	1.25775	0.557762	0.584869	1.36237	0.772237	0.656889	1.16528	0.771915	1.29294	0.630998	0.545594	1.13683	0.674149	0.719977	0.621955	0.541235	1.51349	0.860619	0.837785	1.02616	0.606984	0.874848	0.65183	1.43061	0.560128	0.589635	0.665063	0.662763	0.701801	0.65936	0.744002	1.20208	0.910194	0.553081	0.670453	1.08084
	14.2629	1.15776	0.613216	0.816502	0.665307	1.43073	1.06997	0.648876	1.15527	0.681753	0.599877	0.52685	0.664805	1.24244	0.540308	0.573237	1.30513	0.68206	0.669232	1.16065	0.792081	1.2974	0.560147	0.549435	1.14699	0.622729	0.738298	0.581548	0.497301	1.50166	0.896233	0.856497	0.980827	0.591251	0.844756	0.65044	1.53369	0.605521	0.612068	0.649165	0.67995	0.73926	0.675262	0.818226	1.17407	0.909963	0.568575	0.629735	0.983185
	14.2962	1.22915	0.625661	0.750625	0.62575	1.45672	1.0178	0.579898	1.17971	0.655208	0.589	0.489382	0.634744	1.25867	0.528104	0.616685	1.26249	0.708945	0.665358	1.15413	0.755366	1.21085	0.727536	0.492897	1.18839	0.693858	0.729129	0.55627	0.525961	1.45788	0.878904	0.919794	0.984695	0.569677	0.903894	0.663953	1.44179	0.602438	0.616322	0.652189	0.586327	0.689934	0.734171	0.749608	1.03681	0.938453	0.501507	0.623638	1.00095
	14.3295	1.21715	0.586372	0.757397	0.612656	1.46301	1.00009	0.634837	1.13961	0.654164	0.547037	0.525111	0.61958	1.19992	0.557957	0.585009	1.26694	0.756143	0.66004	1.13527	0.764944	1.15275	0.678656	0.529577	1.15719	0.587545	0.692852	0.615643	0.473915	1.53048	0.803246	0.817039	1.0144	0.54904	0.830561	0.631309	1.42149	0.541454	0.61824	0.636254	0.637869	0.668675	0.661481	0.698863	1.1302	0.849679	0.512424	0.643441	1.07384
	14.3628	1.18505	0.616965	0.742121	0.644433	1.35372	1.03845	0.598603	1.1492	0.633676	0.558606	0.524206	0.562683	1.19214	0.561509	0.61017	1.27154	0.736675	0.668274	1.04817	0.776648	1.113	0.624103	0.500608	1.10604	0.618826	0.700948	0.565178	0.523339	1.46139	0.897841	0.805307	1.00474	0.576498	0.879485	0.634245	1.47516	0.544168	0.595836	0.649563	0.663896	0.66411	0.720978	0.712677	1.17527	0.849941	0.523878	0.653419	1.06428
	14.3962	1.12217	0.619038	0.747585	0.612643	1.44965	1.04882	0.607296	1.09404	0.622575	0.558772	0.502295	0.593695	1.1858	0.543648	0.565447	1.25165	0.755023	0.62596	1.04632	0.750427	1.26951	0.616383	0.517761	1.13412	0.636257	0.695132	0.576009	0.519111	1.54055	0.823162	0.768917	1.00723	0.586258	0.839496	0.626989	1.5303	0.538496	0.58611	0.675593	0.677573	0.700103	0.738342	0.737567	1.04842	0.891213	0.515869	0.630463	1.0576
	14.4295	1.21476	0.571847	0.738026	0.6429	1.35101	1.01491	0.586779	1.08633	0.629117	0.521565	0.523576	0.593031	1.21362	0.564048	0.562531	1.31609	0.695585	0.629039	1.09752	0.749951	1.15102	0.644355	0.511705	1.10664	0.584861	0.627306	0.603136	0.449519	1.48526	0.858075	0.802933	0.978638	0.577661	0.834486	0.621472	1.49721	0.541685	0.624209	0.633311	0.592684	0.663591	0.754639	0.70596	1.10065	0.866966	0.483776	0.62538	1.018
	14.4629	1.15476	0.592061	0.744479	0.614985	1.29536	1.05119	0.564911	1.09603	0.614165	0.544502	0.503048	0.606019	1.17703	0.499116	0.603667	1.22883	0.76841	0.622285	1.15943	0.781251	1.08697	0.589229	0.505173	1.09243	0.61547	0.624014	0.555042	0.507682	1.55108	0.86099	0.834698	0.985066	0.549392	0.850059	0.61509	1.56665	0.544354	0.525515	0.607406	0.662096	0.675681	0.687593	0.717853	1.01318	0.815416	0.56706	0.636344	1.03793
	14.4962	1.13378	0.575116	0.722614	0.637829	1.31462	1.05751	0.562645	1.1103	0.621263	0.556841	0.501942	0.580122	1.11668	0.554212	0.559967	1.25422	0.686896	0.646952	1.02817	0.771026	1.16277	0.678922	0.485731	1.14926	0.578987	0.663978	0.535673	0.504466	1.41003	0.823404	0.757524	0.956303	0.549564	0.828064	0.586163	1.47099	0.561415	0.558064	0.598903	0.602077	0.64377	0.717527	0.736139	1.06366	0.833182	0.481507	0.606493	0.980338
	14.5296	1.16414	0.57504	0.738631	0.597687	1.32894	1.04499	0.533691	1.072	0.626811	0.539822	0.448583	0.565446	1.11918	0.532351	0.588671	1.29752	0.725355	0.631348	1.04258	0.792031	1.16005	0.645884	0.515677	1.06199	0.565518	0.650727	0.549896	0.52536	1.48829	0.7815	0.758155	0.969115	0.590689	0.87527	0.587991	1.47555	0.558962	0.553867	0.591573	0.663584	0.692682	0.666988	0.758231	1.1514	0.790205	0.570934	0.65559	1.02231
	14.5629	1.16938	0.563781	0.709522	0.607521	1.34841	0.99611	0.593636	1.07044	0.648496	0.55327	0.483664	0.555109	1.11327	0.532569	0.600757	1.26482	0.68151	0.618773	1.02313	0.763377	1.11784	0.577492	0.497638	1.10336	0.550125	0.647595	0.568076	0.505213	1.5437	0.868765	0.749481	0.921969	0.587166	0.840772	0.634162	1.45096	0.514652	0.513084	0.621538	0.609782	0.628319	0.653733	0.684546	1.17173	0.802085	0.56242	0.643354	1.03848
	14.5962	1.11571	0.556058	0.748799	0.606052	1.2791	0.97847	0.579373	1.11857	0.626227	0.513701	0.501052	0.550641	1.08598	0.534137	0.618829	1.26472	0.72767	0.5981	1.02507	0.758472	0.982448	0.648288	0.484143	1.06066	0.580979	0.657393	0.528731	0.459297	1.51811	0.824718	0.76785	0.917655	0.56412	0.829462	0.648889	1.38764	0.552224	0.564431	0.590079	0.602104	0.629381	0.69396	0.698941	1.10988	0.84591	0.547723	0.664241	1.03881
	14.6295	1.1133	0.547615	0.678339	0.568798	1.3154	1.03912	0.642577	1.06652	0.599955	0.544044	0.553834	0.559294	1.05164	0.548306	0.606958	1.22484	0.677808	0.59464	1.05725	0.734776	1.05685	0.634164	0.458585	1.06455	0.603352	0.606081	0.545522	0.454903	1.62284	0.838312	0.763459	0.930653	0.563915	0.877647	0.580494	1.37298	0.525451	0.567213	0.594299	0.647818	0.632459	0.718873	0.705443	1.12443	0.855763	0.506962	0.652665	0.98489
	14.6629	1.07531	0.560765	0.733834	0.573045	1.26012	1.04725	0.594866	1.15634	0.652028	0.510665	0.491323	0.53135	1.12155	0.559197	0.592847	1.33672	0.695801	0.585183	1.0624	0.755888	1.03813	0.680457	0.477649	1.08534	0.590691	0.649053	0.563184	0.471463	1.64475	0.799356	0.756402	0.916062	0.5545	0.83022	0.568548	1.42288	0.538759	0.56513	0.591834	0.580775	0.589658	0.690174	0.711796	1.10442	0.795512	0.565482	0.604212	0.98286
	14.6962	1.12626	0.560561	0.700102	0.569248	1.25073	0.999707	0.60209	1.08267	0.620323	0.528582	0.499908	0.538812	1.02595	0.525416	0.565921	1.19131	0.693206	0.583557	1.03739	0.742016	0.978828	0.690572	0.472991	1.04018	0.587091	0.613755	0.530806	0.460597	1.60729	0.789903	0.708736	0.942108	0.585241	0.768282	0.59305	1.44925	0.533468	0.547217	0.597252	0.606111	0.622857	0.623675	0.71577	0.987444	0.810468	0.516304	0.671757	0.969236
	14.7295	1.12615	0.530082	0.690147	0.585673	1.30305	0.998987	0.579165	1.11474	0.612324	0.520874	0.508627	0.589787	1.01738	0.537562	0.572781	1.18776	0.640511	0.614264	1.00419	0.74639	0.930127	0.588383	0.492053	1.07064	0.573991	0.592746	0.525885	0.481851	1.61192	0.82273	0.782021	0.93541	0.581429	0.806256	0.623305	1.33635	0.504763	0.547013	0.60154	0.588316	0.597314	0.603695	0.705554	1.10908	0.779379	0.540437	0.638187	0.952216
	14.7629	1.06432	0.525635	0.726977	0.551963	1.28652	0.985535	0.573798	1.09786	0.595346	0.474583	0.430227	0.533584	0.990113	0.550977	0.594509	1.20048	0.707634	0.61747	0.928008	0.741411	0.946049	0.637105	0.465733	1.01531	0.572727	0.610213	0.535583	0.468543	1.63799	0.832297	0.756455	0.890713	0.560836	0.832838	0.614651	1.37586	0.471614	0.576476	0.571504	0.604856	0.620785	0.669723	0.655626	1.11876	0.754722	0.518629	0.665259	0.978954
	14.7962	1.07791	0.515606	0.696118	0.553154	1.24699	0.919988	0.569658	1.05144	0.611229	0.495139	0.484449	0.572633	1.00898	0.531808	0.603752	1.17957	0.631262	0.566742	0.993666	0.766062	1.00835	0.61384	0.476857	1.05397	0.565343	0.602231	0.521731	0.451282	1.81561	0.817055	0.741708	0.887274	0.543687	0.793675	0.577179	1.34474	0.50737	0.543968	0.566026	0.593981	0.590157	0.659355	0.690984	1.06104	0.757771	0.500519	0.656833	0.930735
	14.8295	1.09573	0.524431	0.692864	0.544563	1.21649	1.0006	0.589005	1.01456	0.602418	0.497976	0.469513	0.542806	1.02356	0.594504	0.585236	1.21998	0.690075	0.595049	0.960235	0.762624	1.04877	0.584489	0.464568	1.02084	0.54086	0.616763	0.540248	0.443079	1.75015	0.801539	0.712927	0.844128	0.575467	0.77744	0.549131	1.23916	0.496241	0.565468	0.570221	0.664597	0.589921	0.63199	0.66367	1.04948	0.774806	0.521045	0.612396	0.91476
	14.8629	1.09933	0.528971	0.650947	0.561251	1.17676	0.979657	0.585075	1.05678	0.584657	0.49724	0.494228	0.565258	1.01852	0.538756	0.570876	1.16474	0.679055	0.560268	0.944581	0.693147	0.883875	0.598896	0.466122	1.03957	0.57284	0.627644	0.555944	0.471999	1.62759	0.83156	0.705997	0.887389	0.547263	0.75567	0.531162	1.24496	0.476679	0.520236	0.540837	0.594932	0.564015	0.634621	0.678899	1.04979	0.752767	0.485986	0.609384	0.871318
	14.8962	1.11098	0.526521	0.689207	0.546967	1.2344	1.00544	0.583279	0.999981	0.578159	0.470521	0.503591	0.588108	1.04197	0.566502	0.536761	1.23544	0.648332	0.616327	1.01512	0.697944	0.969473	0.455956	0.46568	1.07009	0.591168	0.653256	0.510933	0.431443	1.73599	0.7897	0.732753	0.847988	0.564669	0.789309	0.557771	1.14723	0.505859	0.515095	0.548076	0.616419	0.555767	0.608067	0.667834	1.03338	0.763463	0.510229	0.623487	0.880778
	14.9296	1.04541	0.539724	0.678252	0.570144	1.15906	0.958928	0.589594	0.991513	0.605939	0.485657	0.477764	0.510821	1.04543	0.550902	0.559812	1.1659	0.633622	0.589326	0.920434	0.699636	1.03992	0.564387	0.490045	1.09532	0.553117	0.625291	0.554916	0.427424	1.71479	0.783695	0.670726	0.891055	0.556275	0.745442	0.52173	1.25157	0.496378	0.511002	0.539526	0.573624	0.60227	0.591438	0.671788	1.00064	0.717999	0.521405	0.662556	0.902371
	14.9629	1.05685	0.545577	0.661322	0.555426	1.13324	1.00661	0.593392	1.02887	0.589444	0.503219	0.503029	0.505658	1.04417	0.578774	0.559171	1.15485	0.675694	0.584026	0.934408	0.698615	1.12355	0.587407	0.433514	1.01101	0.5959	0.635996	0.510285	0.433333	1.67521	0.765487	0.717997	0.864693	0.559355	0.744934	0.546177	1.14296	0.494937	0.523873	0.558504	0.599846	0.589438	0.647009	0.647367	0.962687	0.771474	0.507102	0.63599	0.865071
	14.9962	1.05805	0.529871	0.658649	0.556353	1.18059	1.01932	0.562356	0.974382	0.586723	0.473818	0.493364	0.521762	0.990697	0.549929	0.564243	1.23685	0.697622	0.587883	0.90362	0.693914	0.995642	0.595458	0.468436	1.08865	0.522265	0.560348	0.510257	0.43349	1.73632	0.808157	0.700384	0.880079	0.556191	0.763219	0.579577	1.11335	0.464216	0.558273	0.552493	0.611397	0.569128	0.619699	0.668537	1.06804	0.712119	0.488899	0.627483	0.918059
	15.0296	1.01325	0.507422	0.6715	0.542526	1.10183	1.0117	0.535259	0.963779	0.568124	0.500731	0.427504	0.514085	0.994948	0.582631	0.516789	1.18433	0.652741	0.562354	0.919904	0.683041	1.01795	0.584645	0.450189	1.03003	0.531206	0.575814	0.523351	0.449915	1.67691	0.789529	0.660899	0.90254	0.510409	0.729817	0.553759	1.12396	0.458224	0.522807	0.536818	0.616195	0.5714	0.573303	0.667543	1.0409	0.712859	0.551005	0.59238	0.877061
	15.0628	1.03444	0.519518	0.616621	0.563795	1.17028	1.04382	0.534507	0.994717	0.612379	0.458498	0.477708	0.547167	0.991373	0.577294	0.565881	1.16963	0.696506	0.610493	0.949181	0.698789	0.952646	0.581623	0.450554	1.02788	0.523667	0.606716	0.528136	0.47128	1.65843	0.767283	0.647474	0.928545	0.517715	0.734099	0.558257	1.05114	0.478951	0.5332	0.558821	0.641995	0.566674	0.629133	0.636386	1.06372	0.723258	0.487635	0.604852	0.906597
	15.0962	1.05805	0.507443	0.66022	0.568455	1.13388	1.07635	0.562201	0.992759	0.605407	0.425443	0.469028	0.51747	1.00067	0.540126	0.588572	1.14671	0.662872	0.632159	0.920875	0.722329	0.974187	0.53885	0.478343	0.998224	0.525245	0.559218	0.533902	0.428301	1.61976	0.739101	0.653804	0.847579	0.537218	0.768735	0.545388	1.18276	0.484716	0.523952	0.53464	0.562611	0.540105	0.609908	0.642604	0.936595	0.704421	0.516607	0.603923	0.874394
	15.1295	1.02973	0.539524	0.657022	0.526048	1.10471	1.06506	0.545462	0.936768	0.587035	0.45406	0.450475	0.565581	1.05988	0.565991	0.547274	1.13179	0.627457	0.597291	0.922896	0.741135	0.971778	0.559086	0.426315	1.04401	0.530199	0.559057	0.502788	0.439359	1.58395	0.793355	0.62497	0.86301	0.525438	0.71173	0.546052	1.04754	0.490298	0.527175	0.587196	0.623124	0.547487	0.642126	0.63981	0.98568	0.691937	0.514936	0.651409	0.895844
	15.1629	0.934028	0.524697	0.611686	0.532451	1.11506	1.06314	0.559066	0.937851	0.593818	0.480862	0.467364	0.522568	1.00853	0.614758	0.539349	1.11646	0.692433	0.575685	0.819669	0.745498	0.98737	0.593129	0.469439	1.07848	0.54272	0.576442	0.533239	0.420384	1.7599	0.813125	0.655578	0.901703	0.551078	0.673908	0.552395	1.09703	0.434604	0.513934	0.561915	0.631152	0.583018	0.556891	0.611421	1.02247	0.710382	0.504317	0.596884	0.846752
	15.1961	1.01219	0.516119	0.634786	0.549727	1.02183	1.02621	0.553433	0.877104	0.582988	0.417176	0.458099	0.546485	0.997715	0.530417	0.53662	1.02805	0.631375	0.59514	0.814742	0.699089	1.0357	0.619925	0.457118	1.02043	0.507901	0.603936	0.511098	0.452102	1.59283	0.774272	0.640294	0.853368	0.542475	0.734425	0.549055	1.05613	0.432507	0.501787	0.503487	0.563845	0.528357	0.573677	0.622704	1.0315	0.704996	0.526773	0.631759	0.850569
	15.2295	0.990677	0.54101	0.629092	0.531452	1.05925	1.04584	0.567063	0.915096	0.557198	0.459607	0.49126	0.474805	1.02955	0.574543	0.554162	1.08317	0.634292	0.555202	0.809978	0.675393	0.98373	0.609512	0.471896	1.01663	0.55592	0.526949	0.531191	0.409515	1.57728	0.797368	0.619279	0.839098	0.530014	0.708241	0.556498	1.0314	0.448938	0.49777	0.559405	0.566948	0.542769	0.567026	0.63243	0.935226	0.678196	0.456007	0.601855	0.910276
	15.2629	0.97592	0.467295	0.631327	0.531252	1.0736	1.03886	0.533887	0.921367	0.565749	0.462791	0.47757	0.534256	1.06378	0.582517	0.550299	1.11302	0.655816	0.576421	0.862318	0.667885	1.01775	0.604395	0.458635	1.04123	0.545947	0.575465	0.485096	0.490111	1.64456	0.804354	0.633208	0.871581	0.529866	0.688653	0.567027	0.980716	0.44608	0.472276	0.519654	0.593336	0.574654	0.653943	0.581662	0.985317	0.660351	0.523951	0.573161	0.894995
	15.2962	0.976853	0.501103	0.661808	0.547287	1.11025	1.05149	0.533397	0.857681	0.550915	0.462726	0.454092	0.524083	0.994662	0.584728	0.57108	1.08773	0.672095	0.553228	0.807798	0.676866	1.05184	0.616304	0.455688	1.03132	0.607333	0.560123	0.527614	0.454805	1.60059	0.783228	0.683991	0.954184	0.523014	0.679182	0.58785	1.01013	0.437446	0.499734	0.539482	0.58443	0.536551	0.553593	0.642542	0.938477	0.694614	0.539223	0.599705	0.850283
	15.3296	0.95898	0.529366	0.636939	0.525353	1.0833	1.03317	0.593853	0.869983	0.593997	0.450664	0.472843	0.500935	1.0714	0.55564	0.542509	1.08563	0.614935	0.538556	0.862231	0.679013	1.00847	0.550237	0.432804	1.03233	0.539601	0.576895	0.508619	0.450895	1.54009	0.776598	0.603095	0.931253	0.484059	0.655169	0.557006	0.97549	0.434355	0.502765	0.542962	0.61117	0.535777	0.522143	0.608049	0.922517	0.63681	0.504221	0.650655	0.859228
	15.3629	0.907068	0.476532	0.611362	0.544006	1.05133	1.02314	0.538389	0.843503	0.562903	0.456086	0.437712	0.493543	1.04563	0.563373	0.52354	1.04229	0.67496	0.540354	0.806098	0.645142	0.974187	0.530884	0.44902	1.06508	0.556733	0.579834	0.519781	0.441708	1.57349	0.7651	0.61082	0.902203	0.512063	0.644362	0.534926	0.984368	0.423501	0.506903	0.52826	0.571504	0.54975	0.600585	0.629319	0.844488	0.596453	0.53783	0.573353	0.889936
	15.3962	0.913641	0.508802	0.643261	0.516204	1.03101	1.01532	0.523882	0.81372	0.554898	0.477973	0.459372	0.464703	1.03356	0.573997	0.581489	1.07412	0.631416	0.565813	0.808641	0.697756	0.970901	0.547235	0.471242	0.994129	0.544829	0.54501	0.51516	0.467354	1.51711	0.783183	0.650969	0.876495	0.514005	0.646571	0.567295	1.10971	0.478224	0.450681	0.530732	0.616885	0.515962	0.58425	0.569819	0.868048	0.608301	0.484134	0.596616	0.919349
	15.4295	0.979904	0.502338	0.606822	0.512644	1.00199	1.02486	0.553384	0.830648	0.53543	0.436113	0.481242	0.489568	0.995506	0.563581	0.532665	1.08999	0.628295	0.548933	0.840238	0.670166	1.04164	0.587934	0.43739	1.05223	0.523568	0.56408	0.519573	0.472788	1.52162	0.801152	0.658133	0.886896	0.534644	0.623788	0.566686	1.11919	0.436473	0.448289	0.577087	0.597753	0.547751	0.585835	0.608428	0.82677	0.612083	0.572016	0.608316	0.935808
	15.4628	0.940589	0.491357	0.66475	0.533689	1.05951	1.00646	0.54894	0.8371	0.555179	0.415064	0.469392	0.545212	0.983823	0.553983	0.505413	1.12232	0.660353	0.517245	0.763713	0.675388	0.984703	0.58153	0.420011	1.02417	0.562033	0.604905	0.512506	0.483543	1.49515	0.813952	0.671502	0.889958	0.480144	0.677198	0.537921	1.07697	0.449143	0.495897	0.537011	0.604816	0.515537	0.545428	0.623285	0.84543	0.608791	0.564285	0.617275	0.86016
	15.4962	0.898939	0.501223	0.615214	0.516444	0.969748	1.02392	0.496028	0.795058	0.578261	0.474457	0.460462	0.519163	0.977508	0.550877	0.533875	0.977454	0.656381	0.548105	0.75495	0.635356	0.956236	0.533929	0.43186	0.996106	0.544562	0.616225	0.469011	0.458696	1.47821	0.785348	0.66763	0.89401	0.508348	0.632071	0.555511	1.1112	0.444319	0.498417	0.518871	0.614957	0.524562	0.58809	0.61977	0.847548	0.594399	0.534741	0.612166	0.852247
	15.5295	0.920685	0.489546	0.606039	0.509817	1.05026	0.999543	0.500077	0.784857	0.571944	0.429023	0.430359	0.510216	0.99678	0.531632	0.522568	1.04682	0.625679	0.511451	0.809306	0.681058	1.02563	0.518852	0.443099	0.996477	0.53465	0.64019	0.490423	0.460345	1.57575	0.761838	0.637417	0.916896	0.486607	0.627514	0.548036	1.05302	0.403439	0.48204	0.52289	0.588553	0.491803	0.53615	0.571719	0.819528	0.555243	0.563143	0.596291	0.864974
	15.5629	0.966325	0.486062	0.630381	0.510472	1.11119	1.03171	0.535699	0.819377	0.56693	0.452896	0.426208	0.492195	0.930931	0.574463	0.531814	1.02139	0.667694	0.513337	0.726283	0.6238	1.003	0.526188	0.45395	1.03728	0.504434	0.610737	0.51899	0.464367	1.52843	0.777894	0.670309	0.86207	0.509973	0.674079	0.517807	1.05125	0.410127	0.468925	0.492343	0.622561	0.488518	0.563746	0.59386	0.839812	0.551104	0.56159	0.601119	0.820429
	15.5962	0.938637	0.49426	0.635367	0.496671	1.09922	0.962074	0.49754	0.789363	0.553747	0.436623	0.420945	0.486117	0.920782	0.567779	0.528083	0.965909	0.671628	0.512158	0.791398	0.636414	1.04215	0.564247	0.41926	0.990812	0.543233	0.608819	0.49177	0.451029	1.52041	0.762736	0.66449	0.895467	0.492971	0.657281	0.552845	1.11224	0.416386	0.473408	0.483272	0.595229	0.530326	0.553722	0.629009	0.874383	0.585132	0.571029	0.607153	0.860048
	15.6295	0.933414	0.497159	0.633436	0.508895	1.12657	0.975718	0.545883	0.774233	0.579915	0.447959	0.462674	0.477057	0.911538	0.561817	0.515274	0.996045	0.62897	0.518383	0.7406	0.636101	1.08709	0.588628	0.458877	1.00812	0.521184	0.611906	0.468642	0.468992	1.53024	0.803783	0.632901	0.845304	0.479623	0.609372	0.555113	1.05312	0.396667	0.483611	0.495243	0.56244	0.499213	0.526009	0.623048	0.848355	0.570756	0.613181	0.591959	0.871274
	15.6629	0.908809	0.504966	0.61982	0.529793	1.04066	1.02051	0.49867	0.754837	0.53994	0.434071	0.452904	0.502386	0.963832	0.537966	0.53954	1.05272	0.633885	0.521857	0.725471	0.638243	1.24853	0.530795	0.460959	1.02833	0.537906	0.585339	0.481759	0.487646	1.50964	0.82299	0.613707	0.858401	0.46997	0.633866	0.544216	0.979727	0.427152	0.510519	0.490032	0.619043	0.520782	0.555303	0.587874	0.934555	0.55304	0.649822	0.558688	0.873689
	15.6962	0.905895	0.482253	0.641181	0.50197	1.04783	0.97575	0.485669	0.809829	0.554948	0.447934	0.497644	0.507637	0.979597	0.561445	0.540536	1.04273	0.602366	0.513196	0.728039	0.649631	1.09611	0.52005	0.425383	1.0151	0.5664	0.616192	0.52542	0.46451	1.51735	0.822809	0.659402	0.809496	0.481884	0.590035	0.554482	0.984897	0.421205	0.515718	0.510181	0.612489	0.516814	0.530449	0.636726	0.876461	0.551734	0.586132	0.544481	0.833194
	15.7295	0.897478	0.513051	0.634995	0.505744	1.024	1.01779	0.500075	0.745684	0.562938	0.421206	0.436322	0.506453	0.968982	0.564405	0.519082	1.02854	0.566383	0.492202	0.79724	0.650677	1.1274	0.504159	0.453933	1.02458	0.607227	0.597356	0.503538	0.469722	1.51111	0.80702	0.633624	0.81769	0.517831	0.65398	0.549468	0.965364	0.42084	0.435405	0.500903	0.557188	0.525109	0.556695	0.593222	0.84158	0.535978	0.560345	0.636925	0.858339
	15.7629	0.913353	0.496556	0.632247	0.501922	1.05801	1.00262	0.490392	0.75719	0.552687	0.453957	0.463927	0.496569	0.976302	0.541985	0.477525	1.01991	0.641012	0.500077	0.695292	0.587966	0.992159	0.600021	0.459556	0.982458	0.564945	0.596034	0.458741	0.470066	1.447	0.803927	0.585672	0.82571	0.47819	0.623662	0.559328	0.909851	0.446399	0.48914	0.479204	0.605841	0.528037	0.54551	0.556696	0.858498	0.538112	0.661068	0.620744	0.833473
	15.7962	0.898459	0.531222	0.624237	0.514006	1.10852	1.01434	0.521315	0.789213	0.541713	0.458685	0.489281	0.516051	0.98182	0.546464	0.48468	1.03464	0.624635	0.527392	0.729539	0.613952	1.11761	0.547595	0.460831	1.04838	0.561386	0.604728	0.484784	0.457598	1.45943	0.799256	0.647602	0.881645	0.489709	0.595584	0.559304	0.943265	0.412315	0.493306	0.471756	0.670167	0.499997	0.535225	0.608353	0.936229	0.532068	0.553038	0.57677	0.940332
	15.8295	0.901527	0.47656	0.636796	0.505247	1.10538	0.957111	0.532899	0.821853	0.546617	0.486646	0.44179	0.495206	0.939317	0.560172	0.531913	0.997709	0.62684	0.530978	0.771014	0.612654	1.15245	0.52012	0.454487	1.00029	0.562123	0.617303	0.503442	0.497141	1.48058	0.782876	0.677453	0.80081	0.468464	0.617725	0.544427	1.02733	0.430987	0.467205	0.508987	0.632394	0.529918	0.505571	0.653993	0.846181	0.522211	0.608031	0.603866	0.887885
	15.8629	0.884416	0.50288	0.607144	0.516319	1.14989	0.993122	0.500721	0.760383	0.546158	0.418176	0.417981	0.522844	0.977648	0.573238	0.506105	0.993168	0.61128	0.506047	0.75496	0.624685	1.12869	0.543897	0.425854	1.00071	0.565976	0.62784	0.50276	0.509943	1.48301	0.788811	0.620173	0.844674	0.476672	0.630806	0.521537	1.07828	0.42532	0.460207	0.493729	0.590795	0.549623	0.526211	0.609143	0.89021	0.522329	0.555693	0.622798	0.955284
	15.8962	0.907332	0.480318	0.626246	0.511819	1.07127	1.01031	0.487511	0.740282	0.576406	0.448711	0.462507	0.469609	0.957347	0.536979	0.507665	1.0374	0.613198	0.511836	0.733579	0.652603	1.04939	0.527314	0.444882	0.96378	0.511504	0.611813	0.488535	0.529771	1.5012	0.800468	0.631495	0.775105	0.485796	0.622566	0.532015	1.12274	0.417604	0.460784	0.499502	0.610756	0.521862	0.549853	0.564131	0.847622	0.55143	0.598893	0.619509	0.871704
	15.9295	0.901505	0.503783	0.641423	0.509229	1.15484	1.02609	0.518836	0.785262	0.569042	0.471529	0.430585	0.507576	0.981749	0.593148	0.501259	0.976732	0.642948	0.495884	0.726016	0.630609	1.07029	0.533852	0.459176	1.03907	0.555734	0.679358	0.50798	0.505879	1.46162	0.827526	0.641131	0.809344	0.474364	0.630107	0.539729	1.13888	0.441221	0.481322	0.513903	0.615965	0.566273	0.554537	0.631798	0.886692	0.557363	0.587645	0.633711	0.898736
	15.9628	0.889169	0.496864	0.630386	0.494423	1.15553	0.99427	0.519308	0.787581	0.55196	0.47928	0.448034	0.498066	0.982013	0.587409	0.503963	0.943296	0.644042	0.481089	0.729566	0.64604	1.16838	0.478258	0.465981	1.02781	0.546792	0.638852	0.494608	0.561095	1.37963	0.781308	0.66765	0.803901	0.496446	0.628754	0.534975	1.18411	0.413883	0.44198	0.505014	0.627117	0.532456	0.531986	0.584758	0.91353	0.498009	0.632652	0.566385	0.888233
	15.9962	0.935281	0.516443	0.6202	0.509956	1.13002	1.02553	0.46751	0.793783	0.545617	0.47641	0.461439	0.483262	0.939152	0.564507	0.480818	1.00824	0.637507	0.504955	0.695926	0.688306	1.18695	0.551332	0.443321	0.944092	0.512917	0.592099	0.484643	0.567508	1.50977	0.781631	0.651848	0.784597	0.482158	0.546284	0.502301	1.16797	0.428401	0.451129	0.506849	0.596388	0.537295	0.511166	0.631481	0.835407	0.507636	0.68325	0.576819	0.826157
	16.0295	0.888741	0.498562	0.629104	0.483202	1.13296	0.988466	0.531982	0.785345	0.569269	0.516115	0.440163	0.450169	0.941616	0.536594	0.489668	0.910266	0.620029	0.518809	0.737748	0.639095	1.06393	0.523215	0.4611	1.07959	0.541704	0.598769	0.492657	0.629747	1.41958	0.785116	0.685178	0.803052	0.46063	0.616421	0.53606	1.10049	0.426848	0.442839	0.481146	0.638162	0.573247	0.540999	0.609691	0.871226	0.497099	0.64249	0.597354	0.906581
	16.0629	0.885749	0.504966	0.633314	0.503985	1.15543	0.968468	0.507861	0.758842	0.574331	0.494263	0.451901	0.455329	0.880601	0.541815	0.515832	0.949341	0.648447	0.482142	0.760651	0.589571	1.05685	0.587721	0.423398	0.996209	0.572803	0.606984	0.489329	0.616654	1.42369	0.747199	0.664283	0.763989	0.47705	0.581071	0.533511	1.10976	0.428085	0.46495	0.482507	0.643659	0.508056	0.546049	0.592245	0.897592	0.523527	0.585922	0.619655	0.915966
	16.0962	0.856467	0.485858	0.618326	0.509371	1.06391	0.960037	0.490354	0.791511	0.542655	0.47393	0.474319	0.477711	0.893324	0.535035	0.49933	0.944967	0.689368	0.525981	0.758543	0.6358	1.29278	0.542315	0.474705	1.00162	0.567068	0.6278	0.478009	0.636423	1.40604	0.795732	0.662722	0.734262	0.465508	0.589253	0.56072	1.18916	0.419176	0.447537	0.490999	0.610029	0.551209	0.497974	0.577896	0.815289	0.506992	0.593526	0.640752	0.826792
	16.1295	0.90395	0.475698	0.632244	0.483175	1.06394	0.940376	0.508181	0.821807	0.559218	0.493416	0.463219	0.463167	0.905414	0.555516	0.540627	1.00985	0.671699	0.484878	0.777234	0.657973	1.15422	0.530553	0.437428	0.987983	0.590461	0.576476	0.487168	0.639231	1.40953	0.776478	0.6475	0.73675	0.495275	0.616441	0.542653	1.0681	0.44739	0.445221	0.505584	0.682704	0.561816	0.454127	0.598061	0.923041	0.526717	0.600154	0.575798	0.862664
	16.1628	0.87888	0.477565	0.598239	0.482415	1.10953	0.950966	0.538557	0.762119	0.551083	0.47676	0.478275	0.51582	0.850425	0.540165	0.477986	0.99667	0.628257	0.480188	0.714532	0.592482	1.16526	0.525207	0.443995	0.990204	0.549634	0.567994	0.482009	0.666642	1.31762	0.755551	0.666564	0.717006	0.487132	0.609978	0.487435	1.05129	0.41825	0.421159	0.501301	0.653162	0.55889	0.534637	0.615489	0.848796	0.540585	0.592651	0.547277	0.848772
	16.1962	0.878419	0.487535	0.60414	0.48857	1.09755	0.899516	0.535846	0.74991	0.536958	0.448568	0.507745	0.472467	0.846346	0.513269	0.515017	0.940714	0.67669	0.475783	0.771181	0.649703	1.11373	0.544864	0.439722	1.00576	0.555916	0.591106	0.470632	0.695559	1.32674	0.785539	0.640972	0.741353	0.464412	0.582294	0.529453	1.00448	0.405924	0.443356	0.460039	0.640626	0.598472	0.539467	0.59446	0.860043	0.540456	0.602019	0.59762	0.883381
	16.2295	0.883475	0.481211	0.594987	0.481209	1.09054	0.911376	0.499765	0.735585	0.527402	0.50346	0.48627	0.490248	0.856452	0.518541	0.507281	0.981009	0.685548	0.490066	0.717052	0.645794	1.15478	0.498714	0.415769	1.01262	0.534501	0.560354	0.490933	0.694382	1.31509	0.803195	0.635559	0.695584	0.448459	0.575878	0.512575	1.01835	0.444994	0.415392	0.505378	0.627166	0.574866	0.529544	0.554442	0.952848	0.521431	0.555649	0.565684	0.86441
	16.2629	0.851316	0.446765	0.616358	0.481694	1.0801	0.926935	0.49887	0.728273	0.556047	0.470159	0.480797	0.4661	0.844551	0.557774	0.521594	0.957292	0.637567	0.500492	0.737618	0.619893	1.19053	0.516959	0.473042	0.990117	0.548149	0.58717	0.483802	0.708923	1.36276	0.805441	0.647566	0.726154	0.469561	0.616029	0.520507	1.1198	0.43043	0.447688	0.45968	0.587225	0.575326	0.518803	0.615653	0.825482	0.504873	0.585081	0.572642	0.895528
	16.2962	0.85597	0.465684	0.611135	0.487202	1.11379	0.89789	0.504053	0.767051	0.541259	0.478035	0.464077	0.494827	0.879014	0.540101	0.487378	0.938904	0.656213	0.479796	0.73359	0.590216	1.26004	0.490891	0.430303	1.0033	0.538588	0.591254	0.46391	0.662512	1.34416	0.734311	0.62855	0.736609	0.463555	0.583435	0.5046	1.05713	0.433871	0.416063	0.45155	0.60095	0.578344	0.549506	0.526311	0.848007	0.514364	0.595071	0.578846	0.879501
	16.3295	0.858737	0.467255	0.604819	0.472797	1.12896	0.930408	0.539946	0.756046	0.526455	0.479327	0.471138	0.438497	0.878386	0.559831	0.481186	0.913326	0.673809	0.488732	0.743084	0.623317	1.11739	0.525764	0.436427	0.978679	0.584007	0.602693	0.506387	0.74871	1.30316	0.766131	0.657281	0.746675	0.468139	0.552469	0.51331	1.06649	0.409727	0.437819	0.508921	0.606542	0.59185	0.510214	0.576623	0.938771	0.513673	0.549387	0.5932	0.866288
	16.3629	0.824921	0.455896	0.614236	0.4919	1.13612	0.897696	0.504297	0.726199	0.565642	0.477586	0.483137	0.475786	0.882405	0.555364	0.502658	1.02671	0.692942	0.475823	0.74585	0.661907	1.16218	0.457644	0.446693	1.01186	0.537409	0.574542	0.50104	0.733281	1.28554	0.804689	0.669155	0.753597	0.463996	0.590469	0.5154	0.989527	0.432869	0.435236	0.440339	0.673406	0.595241	0.514184	0.602023	0.864844	0.492556	0.593324	0.558895	0.859302
	16.3962	0.808618	0.478035	0.597296	0.487565	1.06764	0.948832	0.533418	0.710117	0.580841	0.507042	0.472383	0.466686	0.873871	0.580979	0.468348	0.973228	0.676406	0.489905	0.738314	0.618011	1.16507	0.455688	0.511224	0.957093	0.56405	0.563718	0.50416	0.733078	1.29003	0.748171	0.634415	0.739402	0.465988	0.553022	0.516822	0.986511	0.414492	0.425076	0.469386	0.656415	0.575954	0.515382	0.605939	0.752062	0.531749	0.593311	0.595121	0.854009
	16.4295	0.824907	0.482563	0.584589	0.484441	1.11035	0.918239	0.562689	0.697613	0.570611	0.477888	0.488828	0.490095	0.902799	0.582854	0.455723	0.963044	0.708206	0.469337	0.748456	0.599318	1.16199	0.544784	0.426386	0.966161	0.583333	0.590568	0.485776	0.717217	1.2431	0.802943	0.639643	0.723431	0.459172	0.586236	0.518558	0.959906	0.414241	0.456732	0.460076	0.58979	0.553832	0.577585	0.601353	0.923122	0.531407	0.567862	0.579587	0.893172
	16.4629	0.805458	0.470821	0.613131	0.495378	1.00818	0.880092	0.530219	0.712283	0.550841	0.50438	0.505738	0.449665	0.899756	0.55645	0.465009	0.962541	0.701267	0.468476	0.746378	0.617869	1.08078	0.513313	0.456701	0.982438	0.531921	0.608851	0.488885	0.64363	1.3455	0.753814	0.640195	0.704182	0.471345	0.573936	0.496278	0.867162	0.411659	0.441882	0.495887	0.598827	0.538085	0.553619	0.5952	0.871897	0.488675	0.604511	0.604103	0.880983
	16.4962	0.83211	0.483105	0.602499	0.503205	1.12542	0.915975	0.549682	0.761395	0.547111	0.511016	0.474206	0.465045	0.935795	0.579117	0.478478	0.956521	0.669141	0.476207	0.74305	0.645571	1.07434	0.504515	0.442309	1.01762	0.573882	0.594836	0.488621	0.809524	1.26254	0.76813	0.653078	0.71973	0.440825	0.560337	0.555808	0.926901	0.380634	0.461413	0.495605	0.626048	0.534954	0.584424	0.585091	0.905644	0.524772	0.592405	0.554764	0.867995
	16.5295	0.806189	0.445523	0.59978	0.499475	1.05146	0.965321	0.500422	0.746704	0.55532	0.504642	0.506732	0.448101	0.952671	0.581574	0.511287	0.925458	0.668633	0.475621	0.775107	0.619651	1.19571	0.526853	0.426729	0.984054	0.562898	0.609385	0.497218	0.739999	1.25004	0.779086	0.649482	0.720275	0.47425	0.570489	0.545147	0.892271	0.402347	0.410816	0.484934	0.677472	0.572645	0.550687	0.607034	0.916918	0.518021	0.633524	0.526368	0.88999
	16.5629	0.801979	0.470678	0.594958	0.486517	1.149	0.918722	0.562533	0.704854	0.541994	0.498302	0.542457	0.434579	0.939538	0.543976	0.533274	0.926124	0.667463	0.481495	0.729942	0.629215	1.2167	0.528813	0.402907	0.970661	0.569728	0.553689	0.507366	0.784679	1.28844	0.739892	0.616834	0.717128	0.493194	0.575925	0.55419	0.896303	0.403002	0.447344	0.494834	0.653641	0.53726	0.551082	0.585632	0.858571	0.541539	0.553586	0.55798	0.882595
	16.5962	0.786312	0.458597	0.580905	0.484996	1.08728	0.916145	0.53316	0.690825	0.552591	0.494494	0.528097	0.498299	0.920933	0.539166	0.499902	0.945968	0.654042	0.494319	0.732164	0.6377	1.10866	0.530494	0.409838	1.00652	0.559625	0.569041	0.484818	0.789415	1.34003	0.739784	0.636584	0.739889	0.493479	0.571041	0.541796	0.927196	0.413012	0.430445	0.473278	0.626952	0.530493	0.538406	0.642668	0.841779	0.507323	0.565436	0.538173	0.881
	16.6295	0.786144	0.468375	0.597883	0.477177	1.1089	0.941236	0.504454	0.688388	0.55262	0.45668	0.524225	0.457998	1.02023	0.552107	0.514619	0.953653	0.676292	0.460141	0.704475	0.646643	1.16073	0.499045	0.430393	0.96313	0.580636	0.579555	0.489638	0.720968	1.19868	0.753906	0.643558	0.758585	0.448279	0.548237	0.518696	0.869593	0.411397	0.450915	0.468091	0.635639	0.524254	0.589393	0.569002	0.823775	0.516043	0.547292	0.521582	0.848808
	16.6628	0.805528	0.490583	0.615726	0.467475	1.05522	0.925456	0.503951	0.707281	0.544318	0.48178	0.523832	0.471325	0.933455	0.542206	0.493953	0.964935	0.675706	0.47323	0.727862	0.635525	1.22429	0.506511	0.408898	0.997128	0.586725	0.574297	0.468509	0.702413	1.26106	0.734764	0.63463	0.74643	0.484276	0.562682	0.512346	0.950689	0.403481	0.424878	0.489861	0.609503	0.512522	0.499806	0.569541	0.894477	0.515008	0.536204	0.594301	0.85701
	16.6962	0.830275	0.464156	0.588872	0.478887	1.06729	0.92299	0.566668	0.702583	0.553954	0.508149	0.493497	0.437382	0.947753	0.578386	0.513208	0.922162	0.646099	0.478714	0.738625	0.589987	1.20003	0.543656	0.417888	0.97752	0.563696	0.570931	0.501402	0.696624	1.25174	0.783298	0.615807	0.726524	0.464146	0.533895	0.557331	0.882594	0.400283	0.444953	0.468947	0.632946	0.524648	0.560183	0.591808	0.859622	0.497862	0.553328	0.559106	0.848521
	16.7295	0.802609	0.478799	0.564435	0.500327	1.02865	0.935619	0.526692	0.76315	0.545812	0.47321	0.491654	0.433893	0.966818	0.551198	0.51571	0.915992	0.686196	0.470472	0.756444	0.609128	1.115	0.590334	0.412648	0.958928	0.576871	0.570947	0.484081	0.678714	1.2491	0.788929	0.613973	0.780662	0.458342	0.540121	0.516164	1.01319	0.373074	0.41962	0.454362	0.590749	0.50302	0.538817	0.57605	0.903442	0.507723	0.543551	0.553742	0.915309
	16.7629	0.815602	0.476185	0.571686	0.484305	1.03645	0.938402	0.513729	0.702107	0.533908	0.481439	0.503377	0.45637	0.987605	0.541599	0.465922	0.906013	0.631027	0.46867	0.702611	0.615615	1.23021	0.520498	0.446	0.996632	0.547093	0.563326	0.501351	0.69806	1.25145	0.768498	0.565468	0.747127	0.440567	0.564146	0.544571	0.989528	0.392286	0.423087	0.456728	0.56996	0.534951	0.479182	0.606725	0.88358	0.500577	0.532786	0.512993	0.863695
	16.7962	0.822588	0.46021	0.610687	0.482297	1.0666	0.96251	0.503814	0.710899	0.549837	0.521443	0.498746	0.468653	0.982629	0.560003	0.520144	0.908245	0.648999	0.461728	0.733018	0.616902	1.25056	0.570196	0.452564	1.03385	0.587423	0.602514	0.479358	0.70015	1.28948	0.764466	0.631476	0.78191	0.43796	0.543343	0.511389	1.02863	0.398267	0.420168	0.470174	0.578195	0.50645	0.521537	0.596171	0.837823	0.518745	0.541203	0.560062	0.801578
	16.8296	0.799068	0.496313	0.584081	0.462552	0.974153	0.932998	0.561478	0.720111	0.537562	0.495775	0.48039	0.475635	0.994396	0.591371	0.491089	0.920597	0.669246	0.485774	0.711521	0.631723	1.19594	0.54207	0.458422	1.04639	0.526743	0.577729	0.501558	0.751182	1.20179	0.769078	0.627136	0.773046	0.463863	0.56212	0.524097	0.992611	0.412868	0.415937	0.488518	0.539231	0.521121	0.449936	0.548079	0.907384	0.534515	0.519923	0.537552	0.885698
	16.8629	0.815025	0.487346	0.601623	0.50428	1.02883	0.921652	0.534081	0.675732	0.526398	0.468265	0.487584	0.483134	0.967155	0.566127	0.494596	0.911151	0.632156	0.460142	0.714183	0.650218	1.07537	0.472813	0.464233	0.945571	0.584895	0.555139	0.473881	0.668838	1.11714	0.73049	0.583207	0.771393	0.467124	0.576684	0.513906	1.06197	0.404552	0.443241	0.450879	0.611537	0.514984	0.558265	0.609117	0.948074	0.497063	0.569975	0.591739	0.845662
	16.8962	0.7864	0.463966	0.577956	0.477425	1.07921	0.889985	0.548668	0.735942	0.510713	0.512082	0.486206	0.485817	1.03887	0.585407	0.509108	0.911161	0.639224	0.480634	0.680464	0.612338	1.14806	0.518762	0.441932	0.971168	0.565376	0.555741	0.476432	0.697746	1.18294	0.770604	0.619411	0.796366	0.480206	0.583831	0.540591	1.04623	0.404758	0.407562	0.456582	0.552379	0.497934	0.473583	0.549951	0.863614	0.48643	0.574704	0.53781	0.865609
	16.9295	0.797544	0.482377	0.568006	0.519423	1.05273	0.917779	0.551592	0.702018	0.529638	0.504041	0.515417	0.51837	1.01468	0.607493	0.48347	0.956157	0.686927	0.494589	0.657543	0.59955	1.15562	0.484372	0.432207	0.938943	0.521512	0.581865	0.461838	0.732146	1.15851	0.717197	0.596357	0.783391	0.451124	0.582097	0.497263	1.0309	0.387746	0.44779	0.495699	0.579894	0.483581	0.503486	0.623226	0.896244	0.52388	0.603403	0.551439	0.858208
	16.9629	0.81605	0.495372	0.580059	0.48704	1.07009	0.884371	0.523498	0.700898	0.548441	0.49185	0.478559	0.441433	1.00133	0.566626	0.45578	0.87862	0.674687	0.494094	0.656511	0.62828	1.10301	0.49686	0.462832	0.977727	0.575522	0.584512	0.477708	0.687069	1.02503	0.744	0.594495	0.793466	0.47767	0.568238	0.543137	1.00882	0.375993	0.442583	0.472634	0.538948	0.510902	0.51762	0.565241	0.938177	0.511898	0.563542	0.59821	0.806555
	16.9962	0.839588	0.492948	0.590763	0.489838	1.05737	0.926872	0.568542	0.697206	0.51873	0.483482	0.469435	0.47812	0.9986	0.55967	0.468359	0.929117	0.692621	0.44239	0.657989	0.620761	1.0882	0.476966	0.442923	1.04409	0.577454	0.580501	0.452782	0.691823	1.13643	0.730026	0.612398	0.782207	0.480471	0.546386	0.514536	1.00898	0.412249	0.437068	0.526647	0.601633	0.530323	0.490957	0.586877	0.80612	0.515084	0.559431	0.533689	0.895595
	17.0295	0.842386	0.527779	0.598859	0.472277	1.03699	0.86479	0.544061	0.699474	0.549318	0.462378	0.506097	0.504566	0.978491	0.568529	0.491699	0.89159	0.709678	0.481657	0.671849	0.65233	1.09932	0.459739	0.461196	0.983565	0.578341	0.569401	0.472677	0.74111	1.15152	0.792887	0.590386	0.829487	0.462068	0.566434	0.515606	1.04533	0.428327	0.429411	0.511075	0.5576	0.542638	0.495954	0.594813	0.871142	0.501296	0.593953	0.548436	0.896012
	17.0629	0.842035	0.527671	0.599368	0.507839	0.98947	0.850161	0.533724	0.702215	0.554591	0.493357	0.502272	0.472829	0.988668	0.600297	0.458068	0.882465	0.740089	0.457807	0.706556	0.587509	1.20404	0.489123	0.460761	1.00967	0.525277	0.580152	0.483172	0.675884	1.06668	0.698065	0.622401	0.804537	0.439883	0.581862	0.488165	0.997299	0.404853	0.45907	0.467092	0.571897	0.503435	0.498527	0.551534	0.855092	0.525442	0.503808	0.54165	0.828261
	17.0962	0.809003	0.527828	0.572458	0.485323	0.979089	0.851885	0.558903	0.672624	0.533207	0.467362	0.474257	0.448514	0.977974	0.594464	0.425888	0.843455	0.703184	0.443628	0.670757	0.605165	1.04855	0.479567	0.470958	0.919055	0.547587	0.595986	0.457489	0.638392	1.06164	0.752384	0.605846	0.830854	0.439124	0.563734	0.509117	0.963576	0.42241	0.416953	0.495317	0.521858	0.535152	0.51147	0.564387	0.836901	0.484647	0.557256	0.541358	0.826223
	17.1295	0.798031	0.504363	0.579572	0.492627	0.993984	0.851502	0.543243	0.663047	0.525127	0.482063	0.477904	0.514748	0.96505	0.619828	0.505704	0.884867	0.701859	0.437548	0.639805	0.624748	1.01154	0.454942	0.479204	0.970988	0.505125	0.531411	0.493929	0.677968	1.07097	0.746519	0.598862	0.798495	0.454482	0.551789	0.531761	0.932529	0.384422	0.450343	0.487347	0.550953	0.522291	0.449814	0.594543	0.815724	0.496905	0.53027	0.552428	0.851013
	17.1628	0.808382	0.511829	0.573529	0.476472	1.09392	0.887162	0.520004	0.702652	0.533091	0.485199	0.459121	0.544812	0.978771	0.638701	0.46813	0.81605	0.762248	0.495718	0.676751	0.580329	1.05099	0.465181	0.439859	0.968518	0.52345	0.550124	0.483603	0.576495	1.01096	0.763628	0.641784	0.799365	0.477151	0.578224	0.519545	0.88905	0.373842	0.422593	0.506925	0.556628	0.514484	0.442985	0.579081	0.887927	0.537002	0.557341	0.542539	0.891591
	17.1962	0.783076	0.510654	0.601474	0.481839	0.964981	0.853407	0.534603	0.702288	0.548602	0.470629	0.471336	0.464431	0.966953	0.659739	0.456017	0.847423	0.708966	0.472549	0.681702	0.585989	1.18744	0.436951	0.454125	0.925345	0.546112	0.582301	0.467649	0.616282	1.03076	0.734406	0.641487	0.766358	0.471098	0.568815	0.503512	0.937827	0.412596	0.430082	0.463633	0.533217	0.52004	0.473173	0.619294	0.89481	0.525408	0.587431	0.547085	0.851298
	17.2295	0.820111	0.517354	0.549909	0.514203	0.973216	0.884985	0.552251	0.711631	0.514346	0.502891	0.503258	0.44907	0.99802	0.624731	0.491003	0.832213	0.71741	0.469337	0.698833	0.635459	1.10114	0.459218	0.46253	1.01203	0.549593	0.558546	0.479583	0.631457	1.01075	0.741611	0.626067	0.820434	0.466586	0.563394	0.513439	0.886994	0.384826	0.427561	0.487005	0.584273	0.502044	0.458654	0.567956	0.778618	0.520454	0.563773	0.576751	0.849829
	17.2629	0.836205	0.519435	0.595631	0.500362	0.988505	0.892136	0.49796	0.704558	0.54633	0.479116	0.470162	0.556044	1.05695	0.666628	0.52486	0.877672	0.720918	0.491901	0.703525	0.640325	1.0777	0.457106	0.469781	0.979123	0.558344	0.597362	0.492957	0.625336	1.01194	0.766551	0.626815	0.788317	0.473016	0.582017	0.501151	0.878972	0.404896	0.436829	0.488137	0.557404	0.509187	0.460545	0.537006	0.90055	0.560269	0.548382	0.557101	0.829259
	17.2962	0.820422	0.505721	0.587732	0.495668	0.980291	0.876169	0.554604	0.712392	0.529408	0.46151	0.484876	0.482291	1.00321	0.612336	0.444185	0.820598	0.710805	0.480136	0.684932	0.56181	1.10611	0.508158	0.477437	0.951362	0.535688	0.537165	0.4656	0.607802	0.988511	0.739892	0.617951	0.819124	0.481023	0.578642	0.494536	0.847023	0.426674	0.402707	0.483622	0.559822	0.529421	0.462307	0.553965	0.922274	0.518371	0.556488	0.562595	0.891989
	17.3295	0.848907	0.513168	0.577743	0.494647	1.02486	0.890014	0.537892	0.693905	0.527097	0.476102	0.479381	0.484336	0.974496	0.634035	0.511026	0.84789	0.737025	0.506381	0.744101	0.66047	1.08846	0.487375	0.480824	0.944591	0.568039	0.562724	0.478262	0.608823	1.00089	0.718024	0.630296	0.810007	0.474618	0.583845	0.497453	0.842807	0.412151	0.458094	0.471969	0.525578	0.537383	0.49222	0.595409	0.886269	0.517771	0.523522	0.57145	0.850008
	17.3629	0.849186	0.508841	0.562147	0.501161	0.983161	0.88308	0.548234	0.767276	0.521708	0.471162	0.493673	0.45609	0.988102	0.624142	0.491694	0.882346	0.698572	0.492318	0.65771	0.64909	1.09874	0.489774	0.451918	0.981328	0.497163	0.554288	0.501743	0.569551	1.00864	0.707891	0.603117	0.829084	0.492375	0.555296	0.519039	0.83142	0.401398	0.458306	0.470747	0.504883	0.493034	0.481459	0.598761	0.75811	0.492037	0.58396	0.53601	0.860774
	17.3962	0.856342	0.526607	0.581932	0.510637	0.960794	0.907598	0.522619	0.749719	0.536175	0.45644	0.444678	0.529385	0.977907	0.619202	0.455847	0.873775	0.648079	0.484183	0.678507	0.630555	1.13046	0.464096	0.420826	0.945404	0.533945	0.579611	0.483614	0.555715	0.990647	0.748461	0.612343	0.806511	0.486625	0.569472	0.536946	0.804715	0.423111	0.433583	0.459551	0.610661	0.509232	0.479736	0.604352	0.766478	0.52374	0.604291	0.581304	0.824037
	17.4295	0.841523	0.506058	0.562309	0.502215	0.930877	0.903785	0.499613	0.722535	0.539102	0.450928	0.499809	0.503317	0.991964	0.634305	0.493405	0.84455	0.698713	0.486757	0.682904	0.639789	1.20145	0.524883	0.441439	0.970884	0.537339	0.553766	0.480498	0.554048	0.979987	0.705265	0.614815	0.81884	0.457353	0.577898	0.547337	0.808489	0.416109	0.42606	0.449005	0.535802	0.482168	0.529026	0.596634	0.87327	0.524466	0.595539	0.599306	0.885384
	17.4629	0.858651	0.534528	0.579611	0.477737	0.947048	0.927958	0.495123	0.742837	0.506167	0.429369	0.469765	0.52651	1.02835	0.654477	0.460368	0.806443	0.748975	0.492269	0.632058	0.602979	1.17294	0.537112	0.409439	0.972996	0.531222	0.515231	0.506592	0.567252	0.950378	0.795956	0.584669	0.802297	0.455742	0.600018	0.52622	0.734885	0.381272	0.42215	0.479203	0.544605	0.518101	0.46736	0.609657	0.916619	0.503774	0.562509	0.589489	0.977234
	17.4962	0.797822	0.5679	0.591836	0.481131	0.951946	0.907512	0.485177	0.734122	0.530633	0.426811	0.512683	0.499573	0.940458	0.654108	0.445213	0.825109	0.667977	0.472052	0.70041	0.603166	1.11521	0.516665	0.408697	0.954875	0.533085	0.575285	0.499598	0.527729	0.970937	0.763442	0.613762	0.774768	0.461646	0.574742	0.480604	0.745596	0.399935	0.452603	0.465729	0.522012	0.534773	0.48963	0.555069	0.822485	0.50126	0.539855	0.549111	0.882691
	17.5295	0.82574	0.52543	0.5946	0.470263	0.909803	0.903175	0.504419	0.723875	0.531614	0.435059	0.507822	0.457061	0.957969	0.642512	0.466102	0.798065	0.79514	0.471143	0.714914	0.604192	1.05834	0.477325	0.430408	0.935914	0.547177	0.568125	0.500866	0.525805	0.949858	0.736805	0.573729	0.800357	0.487227	0.565479	0.498139	0.761585	0.410326	0.410752	0.48353	0.564168	0.484117	0.423047	0.555334	0.823947	0.533222	0.536877	0.557359	0.857405
	17.5629	0.824834	0.554042	0.598628	0.472585	0.899643	0.934718	0.514861	0.731258	0.533113	0.440826	0.501322	0.535958	1.01479	0.616767	0.476627	0.82665	0.660167	0.47422	0.685318	0.59135	1.14977	0.485132	0.447532	0.958026	0.548732	0.555065	0.535996	0.515159	0.919355	0.787034	0.642539	0.834233	0.507194	0.588138	0.517766	0.760332	0.392748	0.436982	0.486648	0.514	0.511471	0.507695	0.59661	0.838971	0.476694	0.576489	0.573485	0.858071
	17.5962	0.833787	0.517862	0.598589	0.497827	0.928189	0.944724	0.465609	0.753298	0.566798	0.442716	0.477954	0.51186	0.969106	0.643728	0.504168	0.826922	0.63483	0.467865	0.676657	0.574234	1.09847	0.511746	0.419106	0.943623	0.545822	0.564916	0.514567	0.531181	0.962779	0.791682	0.580251	0.842347	0.46926	0.564451	0.506334	0.723053	0.433234	0.443416	0.48934	0.54494	0.536898	0.490474	0.581605	0.825865	0.494278	0.550792	0.553646	0.822489
	17.6295	0.842612	0.520879	0.601037	0.488982	0.886432	0.921045	0.476707	0.73011	0.535163	0.468907	0.45333	0.498779	0.962928	0.642708	0.465885	0.8569	0.716755	0.49037	0.662066	0.595179	1.13511	0.472878	0.417315	0.903709	0.555087	0.540722	0.49213	0.506008	0.972569	0.776742	0.61404	0.817576	0.474634	0.563551	0.488848	0.711246	0.400089	0.428653	0.452175	0.534114	0.474905	0.476573	0.602268	0.834204	0.510906	0.518347	0.524583	0.838258
	17.6629	0.861485	0.519306	0.604535	0.486762	0.943767	0.94922	0.517576	0.709279	0.540813	0.450462	0.487698	0.477038	0.996558	0.629888	0.472868	0.79111	0.69008	0.458706	0.675514	0.629401	1.16698	0.481033	0.421473	0.941871	0.553243	0.562202	0.498875	0.524282	0.92463	0.753147	0.635658	0.755688	0.469912	0.590492	0.515056	0.728914	0.40649	0.385979	0.467558	0.584587	0.498594	0.470859	0.611606	0.838611	0.53079	0.538623	0.595154	0.908976
	17.6962	0.809875	0.508329	0.577807	0.498179	0.902465	0.990314	0.445976	0.735872	0.530605	0.423689	0.475575	0.464974	1.00852	0.619775	0.487039	0.814601	0.687901	0.503815	0.643544	0.591519	1.24683	0.462047	0.447975	0.983946	0.54877	0.564645	0.497109	0.526907	0.92667	0.760663	0.577547	0.818636	0.464685	0.567352	0.538631	0.691745	0.381274	0.405216	0.49182	0.557777	0.484276	0.475694	0.568731	0.830606	0.460997	0.543803	0.56726	0.857383
	17.7296	0.827842	0.529823	0.597305	0.489882	0.924181	0.961043	0.486495	0.703813	0.55308	0.4392	0.502832	0.527012	1.00342	0.591673	0.480862	0.850824	0.644467	0.480424	0.652604	0.589109	1.13712	0.467661	0.441035	0.936573	0.575127	0.579244	0.509915	0.508269	0.906468	0.717606	0.567996	0.810485	0.500683	0.527844	0.471712	0.751529	0.396604	0.408185	0.474867	0.476112	0.482667	0.48593	0.577256	0.803308	0.480933	0.510015	0.579034	0.890527
	17.7629	0.854357	0.513296	0.609111	0.47118	0.937796	0.936211	0.460332	0.73016	0.512639	0.467614	0.47972	0.510803	0.987635	0.627298	0.481948	0.824141	0.671657	0.476701	0.720821	0.596705	1.11417	0.480979	0.414675	0.961143	0.568653	0.538705	0.534066	0.542242	0.971502	0.739887	0.566179	0.778994	0.445828	0.552616	0.461318	0.717653	0.393891	0.419641	0.447443	0.550697	0.490597	0.439363	0.629912	0.806321	0.519598	0.525253	0.553901	0.840381
	17.7962	0.818451	0.508586	0.625772	0.50968	0.949553	0.915236	0.462757	0.69655	0.54491	0.485853	0.522532	0.52924	0.958994	0.57203	0.460566	0.8332	0.66442	0.466633	0.666784	0.566723	1.17145	0.446972	0.454107	0.978711	0.597442	0.549448	0.478438	0.513791	0.96406	0.666704	0.585083	0.780388	0.482019	0.552456	0.486992	0.684774	0.39568	0.41097	0.480967	0.512154	0.505337	0.469724	0.642054	0.793943	0.493388	0.523248	0.58582	0.913586
	17.8295	0.828595	0.505057	0.601367	0.482576	0.938011	0.885921	0.498462	0.755773	0.564873	0.503571	0.469786	0.49597	0.953935	0.60672	0.453895	0.85184	0.701779	0.500844	0.650785	0.587753	1.05478	0.513401	0.467847	0.929093	0.562806	0.527637	0.514952	0.539387	0.998436	0.714365	0.600401	0.825296	0.469055	0.598258	0.51603	0.682829	0.434218	0.42473	0.49011	0.540069	0.468889	0.463534	0.676991	0.765622	0.499368	0.587905	0.533459	0.841324
	17.8629	0.839035	0.529835	0.616426	0.479173	0.995516	0.910674	0.476291	0.686403	0.538759	0.469641	0.505298	0.567854	0.972181	0.614686	0.476944	0.835742	0.685158	0.482352	0.64315	0.567252	1.03497	0.476157	0.405425	0.949136	0.597485	0.557597	0.545367	0.570059	0.920471	0.71189	0.600134	0.777696	0.461348	0.577735	0.482991	0.758571	0.39329	0.416461	0.459705	0.527928	0.493418	0.484364	0.650359	0.811178	0.477701	0.513885	0.607217	0.888743
	17.8962	0.852974	0.530411	0.588353	0.507858	0.985984	0.880695	0.459961	0.703288	0.543831	0.437974	0.507437	0.564447	0.995734	0.618322	0.460848	0.812806	0.671287	0.486506	0.672802	0.598995	1.07743	0.556596	0.430215	0.943681	0.590258	0.517675	0.524457	0.532273	0.938024	0.745155	0.61695	0.803924	0.468979	0.579141	0.496535	0.667006	0.398381	0.428552	0.476596	0.507994	0.510928	0.495944	0.654931	0.736359	0.506801	0.532495	0.597669	0.891509
	17.9296	0.881449	0.541937	0.593003	0.525914	0.940957	0.94847	0.501838	0.707561	0.54881	0.46383	0.502631	0.553402	1.01191	0.643541	0.478594	0.838626	0.674219	0.491842	0.66593	0.608878	1.01727	0.490269	0.485061	0.971135	0.651378	0.574552	0.489672	0.525033	0.915219	0.706932	0.601158	0.817515	0.479516	0.559289	0.48473	0.72987	0.442285	0.441195	0.502971	0.525506	0.507661	0.528996	0.654795	0.841837	0.493769	0.547807	0.590029	0.934259
	17.9629	0.799021	0.532676	0.633153	0.486603	0.895167	0.967608	0.498171	0.727886	0.56508	0.421089	0.485112	0.60317	0.952889	0.633904	0.455102	0.796045	0.647766	0.470079	0.688803	0.582924	1.11069	0.51459	0.443412	0.87615	0.574175	0.537178	0.536702	0.504786	0.889379	0.70099	0.581153	0.763897	0.48526	0.55366	0.491065	0.64999	0.401232	0.389717	0.501832	0.504231	0.513983	0.464953	0.587946	0.830255	0.46842	0.55581	0.583833	0.850869
	17.9962	0.815831	0.505056	0.616527	0.44678	0.796915	1.03735	0.492526	0.682227	0.546375	0.444535	0.51382	0.572348	0.907952	0.592947	0.439306	0.767841	0.65714	0.474438	0.660007	0.583179	1.0127	0.440925	0.415742	0.840437	0.561865	0.52986	0.463092	0.493864	0.824079	0.693883	0.521771	0.713178	0.441743	0.524064	0.473056	0.65547	0.402357	0.398031	0.482926	0.470726	0.479137	0.475707	0.527229	0.815137	0.486373	0.502506	0.557882	0.805535
	18.0295	0.780879	0.472047	0.617581	0.464098	0.825952	1.04997	0.504681	0.689396	0.545079	0.452387	0.53617	0.546566	0.918543	0.610615	0.480092	0.80969	0.612517	0.480601	0.730129	0.532244	0.916751	0.412497	0.428322	0.7825	0.559307	0.523012	0.493084	0.469126	0.852721	0.67761	0.570468	0.719802	0.458039	0.501034	0.445546	0.630401	0.380122	0.361953	0.433198	0.454151	0.478638	0.431243	0.580475	0.726947	0.462044	0.526072	0.571117	0.771829
	18.0629	0.778621	0.491586	0.615479	0.482795	0.833838	0.985756	0.497686	0.708801	0.520772	0.430748	0.439617	0.541125	0.927224	0.569313	0.41507	0.769392	0.626908	0.495431	0.727431	0.579103	1.02606	0.508916	0.397577	0.82505	0.529781	0.459421	0.457972	0.450199	0.82844	0.668941	0.53975	0.70385	0.455573	0.52175	0.447694	0.653479	0.42144	0.372541	0.469525	0.457312	0.474553	0.423269	0.557832	0.743128	0.475503	0.484279	0.567439	0.806346
	18.0962	0.724755	0.507873	0.596704	0.445176	0.775037	0.904785	0.453224	0.662145	0.520662	0.433234	0.500367	0.508828	0.91306	0.561739	0.460894	0.709027	0.613844	0.460522	0.614633	0.51637	0.995264	0.487497	0.391613	0.782919	0.556554	0.524917	0.461402	0.457646	0.775189	0.595188	0.54121	0.720815	0.449281	0.51961	0.446117	0.640363	0.370592	0.371592	0.448619	0.462327	0.473241	0.417058	0.515221	0.720794	0.459137	0.537354	0.547888	0.757447
	18.1295	0.732103	0.494419	0.583664	0.457797	0.802746	0.906041	0.444361	0.69019	0.511792	0.419556	0.466729	0.503524	0.863724	0.55267	0.436048	0.750508	0.59494	0.44833	0.676798	0.549326	1.0148	0.41716	0.402767	0.810076	0.512	0.462497	0.465539	0.446228	0.81797	0.638295	0.52714	0.712675	0.457046	0.497821	0.446448	0.591398	0.39325	0.367284	0.43742	0.488179	0.454252	0.423744	0.538773	0.697422	0.440494	0.461388	0.531304	0.814522
	18.1628	0.762585	0.457905	0.581876	0.426784	0.795604	0.908581	0.473774	0.686814	0.50647	0.440631	0.497856	0.53522	0.894766	0.582263	0.457603	0.725704	0.624278	0.446571	0.636684	0.521051	0.94466	0.49421	0.410185	0.814313	0.544161	0.523255	0.443652	0.406216	0.842472	0.604032	0.511611	0.656877	0.457831	0.504164	0.44603	0.634321	0.383578	0.39176	0.429774	0.457375	0.45102	0.431145	0.55256	0.697828	0.458393	0.507843	0.547957	0.733275
	18.1962	0.757748	0.5111	0.578023	0.450118	0.861526	0.911881	0.45203	0.62222	0.503934	0.433132	0.428793	0.622189	0.821953	0.555755	0.423776	0.721653	0.531112	0.433818	0.649943	0.535605	0.939754	0.501797	0.392506	0.809456	0.557324	0.501661	0.442753	0.450517	0.878231	0.597495	0.508537	0.662785	0.440388	0.496526	0.446009	0.56803	0.401306	0.385241	0.430526	0.500411	0.459349	0.438017	0.56822	0.690604	0.46783	0.471388	0.546031	0.7838
	18.2295	0.748149	0.476664	0.581125	0.466593	0.792186	0.861696	0.481033	0.657006	0.502376	0.423103	0.480715	0.553716	0.896509	0.522	0.450986	0.676461	0.627109	0.432171	0.614987	0.528059	1.05243	0.457069	0.398198	0.764697	0.498282	0.48224	0.433214	0.407615	0.767625	0.570254	0.509856	0.670534	0.450092	0.464956	0.425624	0.630917	0.389649	0.38683	0.441678	0.46602	0.454658	0.397409	0.599357	0.655341	0.423269	0.47684	0.516634	0.770233
	18.2629	0.717209	0.481689	0.51728	0.437214	0.814173	0.87844	0.454594	0.630427	0.492422	0.39198	0.430251	0.547766	0.835289	0.537346	0.426211	0.724269	0.567232	0.47353	0.602394	0.499649	0.958332	0.478374	0.420285	0.787494	0.541902	0.475582	0.458962	0.467324	0.746269	0.550218	0.508525	0.634392	0.449149	0.493601	0.42268	0.606388	0.417872	0.380229	0.444222	0.457474	0.453673	0.406449	0.500596	0.704955	0.450342	0.5079	0.527313	0.733174
	18.2962	0.688677	0.471116	0.532979	0.422141	0.795604	0.834898	0.41213	0.635075	0.504053	0.393982	0.419705	0.617721	0.820383	0.548203	0.419137	0.713161	0.580361	0.473034	0.602609	0.496893	0.948039	0.410163	0.383096	0.784792	0.576377	0.458334	0.427617	0.419112	0.723457	0.567487	0.512776	0.624386	0.413338	0.477162	0.424369	0.583513	0.379283	0.414008	0.455875	0.465929	0.414051	0.419136	0.564996	0.662046	0.445245	0.456596	0.524491	0.738554
	18.3296	0.711557	0.483134	0.514428	0.461828	0.802561	0.797401	0.432273	0.627072	0.481506	0.399417	0.437156	0.548342	0.816009	0.512341	0.402807	0.69858	0.572646	0.444015	0.648168	0.498607	0.858455	0.460666	0.380403	0.819952	0.525558	0.491101	0.479067	0.438961	0.732682	0.544611	0.499636	0.628615	0.42062	0.476731	0.406092	0.580769	0.3726	0.38635	0.409385	0.479974	0.398303	0.375348	0.536384	0.695758	0.431543	0.471999	0.523367	0.742915
	18.3629	0.680604	0.450212	0.511223	0.436691	0.731643	0.820598	0.465674	0.60418	0.480519	0.39965	0.43066	0.572975	0.799075	0.493987	0.415896	0.664343	0.526748	0.44431	0.604776	0.47181	0.889847	0.466673	0.393042	0.791199	0.460829	0.44825	0.433389	0.38792	0.731342	0.579307	0.480401	0.608279	0.437565	0.466799	0.407785	0.580747	0.390759	0.369751	0.416336	0.474963	0.439252	0.387307	0.532801	0.627497	0.452289	0.440805	0.503921	0.767665
	18.3962	0.679341	0.469845	0.469356	0.449957	0.82035	0.770162	0.442563	0.640468	0.487679	0.403608	0.45579	0.555809	0.815101	0.502644	0.412915	0.690694	0.544693	0.439961	0.598842	0.499773	0.934294	0.484319	0.391538	0.781161	0.484681	0.426238	0.416836	0.435573	0.713308	0.531826	0.476565	0.584806	0.421229	0.461514	0.41478	0.566298	0.377381	0.390944	0.438616	0.427851	0.389932	0.370954	0.52698	0.625661	0.41061	0.456306	0.507271	0.710774
	18.4295	0.675015	0.456246	0.46952	0.440023	0.702523	0.734082	0.421815	0.596516	0.48408	0.407611	0.455034	0.541628	0.776253	0.478325	0.418369	0.66772	0.568635	0.419664	0.589401	0.473583	0.875312	0.424758	0.353139	0.772215	0.458878	0.451005	0.431197	0.408936	0.738468	0.534124	0.484432	0.580205	0.450048	0.468987	0.410402	0.547042	0.372205	0.396064	0.408787	0.436524	0.40595	0.361398	0.528718	0.60636	0.428177	0.492578	0.496198	0.740011
	18.4629	0.678558	0.472222	0.476138	0.433569	0.792908	0.709487	0.447067	0.589993	0.470826	0.382169	0.406764	0.541198	0.80018	0.472566	0.393618	0.697188	0.541188	0.435749	0.594803	0.444378	0.858261	0.436905	0.370567	0.797812	0.502339	0.434337	0.448765	0.423461	0.707484	0.517033	0.475747	0.586893	0.402695	0.48258	0.403731	0.553878	0.356898	0.370267	0.411872	0.436661	0.405598	0.424998	0.535391	0.68504	0.454452	0.406012	0.52229	0.719385
	18.4962	0.632318	0.456818	0.474101	0.433002	0.705539	0.691873	0.423881	0.571243	0.456148	0.426728	0.413047	0.535483	0.78247	0.459838	0.415402	0.657448	0.515123	0.445402	0.588111	0.455243	0.842077	0.415566	0.384443	0.773922	0.48452	0.44751	0.439188	0.397107	0.672071	0.516277	0.472236	0.55791	0.421088	0.454356	0.387369	0.548649	0.375359	0.381836	0.403586	0.410472	0.41193	0.395921	0.569334	0.606342	0.418935	0.427019	0.474606	0.667778
	18.5295	0.610498	0.428825	0.479995	0.440861	0.711421	0.697337	0.423116	0.56264	0.492221	0.380547	0.405035	0.516696	0.830249	0.491068	0.382183	0.654255	0.527517	0.436775	0.568218	0.459834	0.762827	0.443498	0.385335	0.756395	0.459912	0.440653	0.419546	0.393642	0.671014	0.500749	0.451027	0.548488	0.403051	0.444944	0.404303	0.570676	0.336022	0.380031	0.411817	0.423221	0.381986	0.39461	0.594386	0.558346	0.413986	0.422306	0.479404	0.647713
	18.5629	0.655376	0.423643	0.450247	0.409299	0.69252	0.660072	0.430839	0.530421	0.463819	0.411258	0.435013	0.573507	0.747589	0.461936	0.384582	0.647309	0.488081	0.419892	0.559433	0.478868	0.890479	0.41932	0.377142	0.711654	0.449639	0.425591	0.412324	0.412902	0.669874	0.50511	0.447712	0.527437	0.402432	0.446566	0.402209	0.571337	0.366391	0.349747	0.379547	0.411625	0.396483	0.347036	0.507558	0.593971	0.426191	0.396303	0.458939	0.672797
	18.5962	0.62599	0.434814	0.462728	0.417108	0.736264	0.685768	0.40106	0.511194	0.454617	0.370152	0.411396	0.541922	0.811095	0.454526	0.367118	0.632553	0.482634	0.435901	0.567094	0.433025	0.807848	0.437198	0.376664	0.74264	0.444366	0.44034	0.39052	0.378549	0.675044	0.50051	0.435731	0.545828	0.398098	0.449061	0.380168	0.535454	0.380606	0.397837	0.434509	0.427441	0.380643	0.378301	0.566793	0.605486	0.424262	0.454905	0.451589	0.664042
	18.6295	0.625963	0.444067	0.455801	0.402483	0.701577	0.662071	0.376702	0.530454	0.452729	0.382125	0.421822	0.513873	0.7564	0.45737	0.364622	0.667709	0.529916	0.431196	0.502374	0.456668	0.8154	0.393815	0.370445	0.726803	0.449737	0.430863	0.412649	0.430835	0.67137	0.518534	0.434986	0.524345	0.390741	0.452106	0.407971	0.54467	0.374544	0.394262	0.389906	0.397449	0.406575	0.379403	0.543943	0.577245	0.396237	0.401409	0.445126	0.620286
	18.6629	0.624912	0.453887	0.448219	0.405284	0.709027	0.654282	0.404673	0.547448	0.448116	0.407294	0.419864	0.550615	0.781075	0.459096	0.392975	0.659254	0.502142	0.439901	0.537504	0.442103	0.794979	0.420115	0.410313	0.715015	0.482827	0.432349	0.395005	0.397823	0.622221	0.503328	0.433007	0.532801	0.397428	0.426584	0.421482	0.548994	0.353583	0.385188	0.394754	0.426777	0.371593	0.407561	0.503043	0.530539	0.451208	0.423874	0.462774	0.680431
	18.6962	0.593371	0.428418	0.444586	0.404926	0.709651	0.636223	0.405137	0.533053	0.455293	0.382772	0.417025	0.514046	0.771639	0.434035	0.378182	0.636969	0.475668	0.427028	0.517576	0.442579	0.770753	0.391924	0.392752	0.733403	0.470369	0.449926	0.426037	0.379171	0.657515	0.502241	0.436473	0.520078	0.403229	0.441286	0.40331	0.539095	0.372938	0.35641	0.391969	0.414459	0.375071	0.352726	0.52995	0.610338	0.418475	0.38385	0.434413	0.619815
	18.7295	0.612987	0.458469	0.430253	0.394729	0.715186	0.65414	0.420816	0.514458	0.443537	0.347957	0.376737	0.55123	0.748768	0.417346	0.392816	0.619573	0.483084	0.421766	0.512717	0.461288	0.808386	0.377142	0.352234	0.740984	0.446831	0.427851	0.43143	0.401012	0.657483	0.495357	0.419822	0.513229	0.394294	0.427957	0.402788	0.51321	0.33797	0.396563	0.390196	0.418705	0.373544	0.423108	0.507576	0.575613	0.419298	0.474235	0.4348	0.633022
	18.7629	0.576574	0.455466	0.455266	0.417523	0.676833	0.630774	0.387745	0.519457	0.441885	0.386248	0.401912	0.562597	0.756452	0.445307	0.39907	0.618086	0.474239	0.406752	0.542086	0.447367	0.770917	0.439827	0.351239	0.707312	0.458899	0.432051	0.407502	0.380067	0.636464	0.492116	0.427232	0.50711	0.393661	0.403072	0.417268	0.528229	0.329304	0.364648	0.381185	0.41613	0.368736	0.392798	0.561818	0.555491	0.412343	0.40969	0.420257	0.641854
	18.7962	0.556405	0.436403	0.445706	0.40604	0.736561	0.650639	0.381944	0.536307	0.445316	0.389095	0.395909	0.518134	0.757115	0.433353	0.377351	0.622047	0.484091	0.386236	0.523038	0.452473	0.835605	0.39804	0.365986	0.729885	0.455177	0.396947	0.410984	0.410905	0.618317	0.468259	0.440921	0.492122	0.36495	0.400213	0.390215	0.512949	0.336884	0.380301	0.366973	0.385578	0.382903	0.362819	0.475894	0.606555	0.400472	0.383941	0.425362	0.644803
	18.8295	0.55577	0.41873	0.43347	0.403671	0.660547	0.643334	0.361326	0.492654	0.432525	0.39913	0.4042	0.537724	0.73545	0.429365	0.351527	0.60745	0.431114	0.42628	0.497863	0.418558	0.789307	0.425259	0.383578	0.678829	0.436938	0.40945	0.417927	0.374457	0.604607	0.490436	0.438642	0.50396	0.391807	0.407206	0.373687	0.492452	0.37133	0.347522	0.395478	0.440397	0.370808	0.347677	0.493861	0.545681	0.420204	0.380862	0.439561	0.620957
	18.8629	0.539977	0.436379	0.44527	0.428861	0.689355	0.643231	0.389283	0.528109	0.454625	0.405267	0.397591	0.553391	0.746042	0.446584	0.377421	0.64542	0.483952	0.413057	0.483122	0.454814	0.73219	0.401619	0.377759	0.71899	0.452525	0.429256	0.400867	0.385912	0.638415	0.496162	0.448205	0.501705	0.362751	0.413362	0.397546	0.504913	0.349367	0.34903	0.401795	0.412315	0.371044	0.429147	0.504114	0.596427	0.417553	0.418261	0.42682	0.596669
	18.8962	0.56686	0.461212	0.443822	0.412812	0.681502	0.618174	0.400582	0.524166	0.44229	0.399865	0.391177	0.438579	0.703053	0.381954	0.376883	0.615115	0.485782	0.401499	0.535149	0.433766	0.690238	0.376156	0.356967	0.715956	0.398539	0.414713	0.410783	0.356798	0.636263	0.473681	0.412977	0.473015	0.389617	0.409051	0.447629	0.523053	0.354685	0.388881	0.388176	0.403389	0.378659	0.394712	0.475036	0.504591	0.381856	0.364421	0.415606	0.638564
	18.9295	0.527295	0.43983	0.429501	0.43018	0.721278	0.588854	0.396078	0.533944	0.433113	0.382551	0.397214	0.530868	0.706033	0.406574	0.404819	0.660523	0.472695	0.40734	0.51248	0.429778	0.681286	0.327317	0.380384	0.694836	0.451867	0.384543	0.376992	0.370862	0.623698	0.480138	0.420981	0.462102	0.393416	0.425739	0.375641	0.517029	0.351914	0.348621	0.374147	0.41988	0.371018	0.401082	0.468565	0.552142	0.395308	0.424241	0.403014	0.598442
	18.9629	0.549297	0.431747	0.409917	0.407605	0.668587	0.613815	0.363163	0.53849	0.447552	0.391246	0.374319	0.516529	0.730472	0.389184	0.356158	0.621819	0.437428	0.416539	0.549393	0.418825	0.745079	0.411387	0.362272	0.666263	0.442332	0.381912	0.389681	0.390086	0.637741	0.481679	0.398313	0.451376	0.374957	0.406567	0.39143	0.475045	0.345771	0.380381	0.350846	0.397453	0.359009	0.345022	0.463541	0.517296	0.401505	0.385138	0.402184	0.570204
	18.9962	0.5562	0.41451	0.411056	0.387214	0.69006	0.588857	0.376189	0.502984	0.430757	0.377062	0.368145	0.48787	0.70495	0.397191	0.360026	0.581387	0.445749	0.37206	0.479824	0.437598	0.689357	0.358307	0.348961	0.660082	0.442365	0.387528	0.40628	0.366987	0.639236	0.436239	0.38507	0.453891	0.364527	0.408405	0.364323	0.484004	0.354147	0.336768	0.41563	0.393445	0.369898	0.352065	0.440182	0.513081	0.383326	0.384498	0.412872	0.563555
	19.0295	0.543536	0.447425	0.4266	0.423528	0.661153	0.559986	0.394093	0.506394	0.416552	0.351537	0.36581	0.469416	0.698288	0.381836	0.355051	0.623123	0.395273	0.417986	0.533556	0.410287	0.732332	0.359743	0.349264	0.662303	0.472382	0.394047	0.392336	0.376314	0.616138	0.465955	0.393193	0.478443	0.389443	0.419151	0.36869	0.499618	0.350458	0.366394	0.361586	0.432283	0.366679	0.383341	0.472706	0.5514	0.390206	0.353615	0.389778	0.569424
	19.0629	0.524325	0.427773	0.434756	0.416297	0.697182	0.603638	0.399237	0.48536	0.420819	0.376732	0.369219	0.478083	0.694065	0.398384	0.353591	0.624621	0.436406	0.424295	0.506792	0.406654	0.618392	0.377877	0.336798	0.642565	0.465935	0.389524	0.376807	0.373406	0.613349	0.460343	0.41251	0.463645	0.374173	0.403343	0.402407	0.495155	0.340906	0.359581	0.352656	0.4022	0.34557	0.407249	0.49083	0.551494	0.380462	0.371832	0.40675	0.596123
	19.0962	0.543137	0.4432	0.423797	0.407669	0.634265	0.592221	0.387007	0.483205	0.436192	0.387246	0.392038	0.464533	0.71023	0.40854	0.370667	0.614633	0.460406	0.394765	0.521685	0.42236	0.675088	0.376561	0.349638	0.662857	0.467808	0.410776	0.398867	0.377889	0.586055	0.467326	0.392372	0.4602	0.404266	0.407027	0.378966	0.479289	0.345986	0.362843	0.384345	0.412903	0.339407	0.35599	0.435915	0.503255	0.40434	0.411342	0.382679	0.556796
	19.1296	0.510859	0.427677	0.42279	0.401572	0.645962	0.610098	0.384274	0.481677	0.400219	0.38251	0.351201	0.505	0.684373	0.412495	0.35573	0.596088	0.411994	0.408201	0.522644	0.413688	0.671201	0.353632	0.34457	0.683321	0.436915	0.41622	0.405321	0.360543	0.575795	0.450849	0.406341	0.440917	0.380938	0.397138	0.392412	0.50978	0.358707	0.344361	0.374948	0.384026	0.352268	0.359228	0.444991	0.555829	0.392332	0.403457	0.399068	0.560866
	19.1628	0.51366	0.41349	0.41443	0.385614	0.598984	0.583898	0.38863	0.456241	0.419016	0.349276	0.34549	0.466409	0.716922	0.370307	0.38025	0.573934	0.404848	0.39814	0.499093	0.418756	0.668051	0.375178	0.338435	0.637795	0.465916	0.384684	0.369399	0.363698	0.57739	0.443546	0.439117	0.450891	0.38212	0.39277	0.372104	0.469915	0.372528	0.37189	0.345064	0.416365	0.327473	0.388109	0.435531	0.492211	0.388723	0.427027	0.389499	0.535743
	19.1962	0.51234	0.43242	0.406601	0.374611	0.633263	0.589193	0.386393	0.480684	0.422479	0.349955	0.378321	0.502756	0.674481	0.413908	0.36465	0.59925	0.415801	0.381175	0.534224	0.423536	0.676038	0.327976	0.35187	0.676224	0.456383	0.381727	0.385366	0.383635	0.585739	0.45208	0.379554	0.442255	0.36444	0.403034	0.363163	0.495487	0.34289	0.367058	0.342288	0.389359	0.341478	0.345836	0.468563	0.46716	0.384147	0.366654	0.379692	0.501331
	19.2295	0.516456	0.409894	0.415391	0.386065	0.598147	0.598975	0.368502	0.473107	0.413352	0.364922	0.397996	0.476805	0.65899	0.392364	0.360584	0.564895	0.421206	0.369972	0.534433	0.405455	0.579774	0.352384	0.363322	0.625797	0.430573	0.383241	0.357823	0.375976	0.555637	0.45626	0.416159	0.431919	0.355538	0.39295	0.348777	0.455745	0.351249	0.349124	0.352259	0.398996	0.358168	0.398215	0.518266	0.490177	0.391573	0.37228	0.377587	0.547843
	19.2629	0.51017	0.430674	0.424118	0.402454	0.613282	0.57412	0.386654	0.496294	0.439269	0.357868	0.344651	0.459746	0.646466	0.396453	0.359799	0.606808	0.4379	0.390827	0.514724	0.419078	0.616809	0.3772	0.368675	0.651286	0.434809	0.382231	0.383579	0.381004	0.591009	0.442962	0.425898	0.433824	0.356209	0.398778	0.345137	0.496511	0.356495	0.349834	0.33	0.400488	0.350624	0.348554	0.515279	0.566667	0.390268	0.406085	0.389575	0.518582
	19.2962	0.505069	0.416061	0.415175	0.387066	0.597966	0.568369	0.399046	0.475795	0.424464	0.364825	0.345586	0.483722	0.648472	0.383362	0.355463	0.554169	0.415412	0.417779	0.486916	0.426606	0.691397	0.372665	0.34139	0.616975	0.461952	0.355716	0.392678	0.350492	0.597416	0.43425	0.380096	0.433593	0.362315	0.386452	0.366695	0.484996	0.321588	0.330296	0.381406	0.415815	0.34588	0.367403	0.425232	0.513225	0.39257	0.403333	0.360543	0.523531
	19.3295	0.482583	0.421354	0.415796	0.407891	0.588978	0.536304	0.383578	0.44567	0.411313	0.354085	0.384893	0.464278	0.672377	0.395415	0.357648	0.575255	0.429002	0.427489	0.491315	0.388783	0.586015	0.371153	0.362036	0.663944	0.437777	0.399344	0.371896	0.373136	0.572728	0.404037	0.435025	0.428532	0.361064	0.380934	0.360224	0.450658	0.348661	0.35379	0.392519	0.378562	0.320784	0.332488	0.436533	0.505453	0.374255	0.364855	0.384898	0.544524
	19.3629	0.507974	0.41677	0.414752	0.402707	0.596373	0.560003	0.370182	0.465882	0.432047	0.34757	0.385859	0.461346	0.664172	0.388934	0.371426	0.568737	0.416814	0.387368	0.473454	0.409645	0.605131	0.380654	0.352138	0.632785	0.456981	0.378442	0.408461	0.357982	0.586917	0.421603	0.410066	0.432663	0.357411	0.360056	0.377917	0.45121	0.361895	0.346859	0.361604	0.396214	0.349031	0.344319	0.492163	0.484351	0.365684	0.403048	0.361235	0.480936
	19.3962	0.490822	0.421791	0.389901	0.392656	0.566194	0.570528	0.344753	0.470749	0.416175	0.372772	0.395369	0.462713	0.659222	0.365335	0.355119	0.534318	0.430375	0.367041	0.486651	0.400348	0.541026	0.320609	0.331716	0.617838	0.445674	0.362986	0.404793	0.354551	0.549482	0.407118	0.427566	0.464039	0.368183	0.375058	0.369652	0.462995	0.354509	0.357421	0.354469	0.391587	0.338666	0.384901	0.423326	0.469902	0.387583	0.365381	0.382821	0.515533
	19.4295	0.502882	0.431321	0.395736	0.381268	0.570518	0.547273	0.39957	0.476745	0.415922	0.38952	0.355976	0.431731	0.598333	0.373005	0.356133	0.553292	0.424019	0.382066	0.493024	0.412615	0.570366	0.375012	0.34567	0.639854	0.428124	0.39176	0.37721	0.371184	0.54604	0.393332	0.404414	0.431345	0.366727	0.378425	0.379715	0.463864	0.320616	0.343218	0.352608	0.377962	0.362048	0.357697	0.432228	0.467902	0.381534	0.341455	0.382171	0.494387
	19.4629	0.483521	0.41791	0.412473	0.37623	0.616959	0.549316	0.387246	0.488897	0.408278	0.382205	0.345438	0.427783	0.668302	0.369352	0.38763	0.552668	0.411051	0.391324	0.511444	0.400713	0.543222	0.369394	0.351724	0.618662	0.42096	0.376164	0.37536	0.376033	0.562521	0.416369	0.457106	0.423998	0.33478	0.353885	0.356607	0.484546	0.353307	0.366198	0.336042	0.398319	0.34031	0.371047	0.474954	0.47038	0.404961	0.366331	0.367948	0.531752
	19.4962	0.477115	0.414408	0.417066	0.390974	0.575827	0.548321	0.395197	0.489482	0.397594	0.378103	0.387594	0.419585	0.642059	0.36482	0.341107	0.541417	0.397022	0.384708	0.476187	0.414201	0.568342	0.377118	0.345714	0.632916	0.440792	0.385968	0.382674	0.37644	0.532288	0.415224	0.43255	0.429592	0.336603	0.385338	0.371449	0.4637	0.325739	0.350284	0.338887	0.384698	0.327564	0.367084	0.46079	0.484305	0.387233	0.391855	0.371167	0.51242
	19.5295	0.503212	0.421749	0.408402	0.385902	0.563464	0.602141	0.369417	0.484816	0.400244	0.358928	0.362945	0.467828	0.665236	0.362693	0.4025	0.547508	0.426493	0.376245	0.48645	0.413686	0.583014	0.366113	0.341755	0.619832	0.446364	0.375309	0.36682	0.36192	0.565499	0.408838	0.407403	0.426151	0.36318	0.386214	0.369997	0.45507	0.364158	0.352701	0.359843	0.381432	0.336344	0.334576	0.492002	0.494136	0.41861	0.38823	0.377591	0.504889
	19.5629	0.492931	0.426765	0.410195	0.385576	0.5757	0.567223	0.378862	0.453944	0.408992	0.361454	0.379489	0.457009	0.633966	0.36409	0.344162	0.530491	0.399638	0.395472	0.44513	0.409703	0.509843	0.404012	0.360032	0.625478	0.399402	0.365514	0.345622	0.338719	0.540864	0.431011	0.409041	0.410909	0.345316	0.393191	0.361163	0.467674	0.354819	0.340685	0.341649	0.373902	0.359216	0.362142	0.456834	0.478279	0.3621	0.395622	0.357682	0.508811
	19.5962	0.492428	0.407214	0.410951	0.390341	0.584132	0.575277	0.354821	0.476265	0.40948	0.36746	0.358669	0.427604	0.6147	0.38615	0.379983	0.540863	0.437	0.395504	0.491262	0.421236	0.518712	0.319695	0.34558	0.600448	0.426202	0.381303	0.363574	0.370204	0.542799	0.395208	0.403466	0.413901	0.347876	0.378527	0.350577	0.43184	0.334684	0.362693	0.333287	0.387041	0.351299	0.374595	0.449602	0.45136	0.375015	0.431128	0.371419	0.513807
	19.6296	0.476677	0.4145	0.407683	0.387553	0.566619	0.562781	0.35899	0.469363	0.421235	0.358337	0.376734	0.437579	0.59788	0.342391	0.370203	0.555287	0.433747	0.387612	0.473519	0.397717	0.536138	0.362814	0.320674	0.59436	0.422281	0.396804	0.401147	0.319974	0.53179	0.406453	0.407001	0.416845	0.332021	0.378458	0.358056	0.44352	0.325657	0.368888	0.344104	0.379658	0.34887	0.318572	0.460492	0.452907	0.383755	0.341404	0.366654	0.494944
	19.6629	0.474522	0.402896	0.408227	0.369438	0.541019	0.564229	0.375829	0.456438	0.414688	0.356011	0.348016	0.431528	0.612739	0.354691	0.373521	0.4961	0.414886	0.392572	0.522384	0.399174	0.573899	0.312794	0.343372	0.583146	0.417815	0.372425	0.381646	0.345934	0.50876	0.427716	0.400781	0.404062	0.359782	0.388624	0.376582	0.43462	0.336683	0.363227	0.350855	0.361772	0.337963	0.358048	0.44531	0.490282	0.36643	0.349555	0.396597	0.485171
	19.6962	0.50068	0.419324	0.394066	0.392285	0.580025	0.557247	0.398528	0.45273	0.425702	0.369454	0.369875	0.474222	0.64737	0.353769	0.352359	0.5412	0.403477	0.405317	0.479415	0.399113	0.547759	0.401375	0.354481	0.603228	0.405033	0.368941	0.383484	0.355664	0.541828	0.409364	0.414194	0.397402	0.350706	0.37472	0.385096	0.457948	0.316489	0.351721	0.337698	0.354998	0.333724	0.371337	0.459379	0.444496	0.368039	0.3503	0.3701	0.496426
	19.7295	0.466057	0.363917	0.392661	0.376283	0.528243	0.565351	0.35804	0.478281	0.411371	0.384538	0.365637	0.436722	0.604582	0.384158	0.359549	0.524582	0.400224	0.385377	0.468971	0.391271	0.554761	0.375062	0.350517	0.609103	0.435672	0.371195	0.387817	0.332435	0.523056	0.394749	0.410708	0.393701	0.35227	0.342148	0.336125	0.439858	0.327352	0.381521	0.360796	0.369655	0.339222	0.368952	0.503079	0.457295	0.388399	0.336068	0.390229	0.492578
	19.7629	0.481418	0.393892	0.410495	0.384424	0.531335	0.55924	0.36652	0.472455	0.408704	0.353745	0.386797	0.450929	0.61164	0.364778	0.357684	0.508935	0.394206	0.390346	0.498211	0.376692	0.500843	0.330963	0.344961	0.590915	0.445321	0.374891	0.348717	0.34624	0.485894	0.395525	0.392402	0.406061	0.358938	0.374978	0.365446	0.451046	0.321937	0.367428	0.340839	0.34436	0.34258	0.364951	0.505949	0.505993	0.390705	0.369019	0.356411	0.465358
	19.7962	0.480694	0.385856	0.399081	0.371788	0.566876	0.586313	0.37335	0.461632	0.418796	0.356279	0.360257	0.477234	0.59602	0.370827	0.342896	0.518484	0.385183	0.37518	0.482	0.409399	0.575762	0.384402	0.348472	0.581815	0.421678	0.390091	0.34365	0.3615	0.516273	0.402474	0.38637	0.417721	0.341766	0.379301	0.34608	0.455394	0.338864	0.3339	0.330971	0.385775	0.329504	0.373434	0.461918	0.431824	0.363387	0.335228	0.37105	0.447551
	19.8295	0.46798	0.404498	0.384333	0.381071	0.534023	0.576571	0.393278	0.433491	0.419835	0.374738	0.336955	0.480568	0.618471	0.371903	0.361041	0.506785	0.38742	0.411809	0.477144	0.402134	0.471565	0.361567	0.344364	0.602681	0.459309	0.373356	0.367044	0.360269	0.508103	0.398657	0.406504	0.396867	0.357035	0.381896	0.363284	0.448189	0.345576	0.357064	0.349166	0.364551	0.337892	0.356995	0.47729	0.446015	0.38199	0.347832	0.36567	0.473238
	19.8629	0.453714	0.404394	0.384193	0.371855	0.493327	0.569755	0.346401	0.461877	0.39347	0.361104	0.358366	0.432074	0.615883	0.348108	0.374386	0.539242	0.375387	0.388329	0.466951	0.385762	0.508442	0.347777	0.344156	0.61784	0.41098	0.382203	0.345486	0.346827	0.50926	0.375714	0.375125	0.414178	0.362911	0.368283	0.357748	0.440995	0.340241	0.351115	0.34168	0.411381	0.336638	0.381584	0.460831	0.429184	0.381568	0.351721	0.384623	0.474897
	19.8962	0.474339	0.39567	0.403988	0.382897	0.535726	0.57385	0.37097	0.458317	0.41251	0.363217	0.360164	0.3948	0.590058	0.352264	0.345842	0.498505	0.404958	0.374754	0.490382	0.381205	0.575506	0.380652	0.328268	0.610725	0.463136	0.361948	0.337272	0.348816	0.491022	0.410743	0.430987	0.394146	0.368455	0.37733	0.360988	0.438059	0.323295	0.35359	0.332844	0.384228	0.351118	0.400125	0.445549	0.437875	0.37876	0.379405	0.369732	0.470029
	19.9295	0.441487	0.392028	0.406705	0.37106	0.539778	0.578348	0.391264	0.465052	0.405982	0.369806	0.373588	0.419375	0.630184	0.364635	0.358012	0.499374	0.395777	0.397759	0.468243	0.390418	0.549458	0.363877	0.364624	0.613278	0.457986	0.381865	0.383248	0.345982	0.511532	0.417155	0.430336	0.421214	0.388408	0.387334	0.358739	0.446406	0.33328	0.350085	0.353757	0.368518	0.339077	0.375534	0.459585	0.44446	0.372556	0.40921	0.356047	0.469238
	19.9628	0.47286	0.394037	0.403044	0.385742	0.515763	0.578063	0.390491	0.487265	0.390279	0.379955	0.377426	0.450717	0.609376	0.387517	0.414012	0.51896	0.41766	0.408752	0.492525	0.424594	0.515201	0.367379	0.348487	0.629823	0.437385	0.391651	0.380729	0.378218	0.509867	0.409076	0.399882	0.410928	0.33478	0.378454	0.368893	0.436972	0.329675	0.367678	0.364572	0.39372	0.343625	0.342145	0.477946	0.495268	0.38265	0.373576	0.382304	0.47371
	19.9962	0.449167	0.381898	0.39741	0.383875	0.522759	0.558332	0.367943	0.462623	0.389625	0.346548	0.369312	0.424332	0.577667	0.358063	0.350118	0.486045	0.364966	0.383393	0.48438	0.395388	0.535461	0.359521	0.347977	0.567605	0.444872	0.36948	0.369456	0.360103	0.509408	0.374917	0.383982	0.403945	0.337468	0.362935	0.341448	0.442803	0.34676	0.339584	0.371024	0.378485	0.341524	0.359941	0.460187	0.446187	0.370632	0.326229	0.37641	0.447594
	20.0295	0.475086	0.392264	0.407527	0.364048	0.567011	0.588425	0.410721	0.473583	0.42976	0.387274	0.364377	0.44946	0.615204	0.36202	0.338051	0.509858	0.410606	0.404786	0.45779	0.414005	0.536851	0.32379	0.357765	0.584855	0.441713	0.374696	0.373652	0.372784	0.524816	0.411202	0.426908	0.42429	0.346864	0.357051	0.356186	0.443804	0.348624	0.348279	0.371124	0.387028	0.361817	0.369589	0.493456	0.462016	0.375851	0.385117	0.352961	0.451959
	20.0628	0.446651	0.39349	0.400391	0.393997	0.512128	0.583194	0.380221	0.468125	0.410936	0.360691	0.378139	0.417483	0.578124	0.364075	0.350337	0.527889	0.41255	0.388372	0.488206	0.415712	0.514955	0.347448	0.347005	0.573008	0.423779	0.352307	0.33819	0.379131	0.5023	0.382695	0.406943	0.396798	0.357432	0.391731	0.352913	0.448802	0.315751	0.354552	0.350378	0.410836	0.342044	0.367194	0.422054	0.444768	0.374772	0.370449	0.359723	0.472932
	20.0962	0.466522	0.398083	0.393351	0.381546	0.551202	0.567649	0.383578	0.476567	0.390803	0.338803	0.339632	0.446275	0.599219	0.339513	0.354734	0.519326	0.386298	0.358556	0.499713	0.382191	0.555824	0.359716	0.354681	0.600232	0.418005	0.38041	0.344453	0.380587	0.486752	0.404588	0.385973	0.404604	0.349722	0.400344	0.351706	0.428576	0.334148	0.357128	0.350882	0.382034	0.331462	0.350416	0.466241	0.471302	0.398356	0.415648	0.388363	0.457888
	20.1295	0.460338	0.425232	0.400005	0.372058	0.521567	0.56465	0.364595	0.446136	0.414383	0.384742	0.340283	0.414348	0.56444	0.349228	0.348499	0.509129	0.392972	0.385978	0.534231	0.393002	0.560155	0.379586	0.361734	0.56554	0.392219	0.400002	0.377894	0.359209	0.475798	0.380813	0.383906	0.378863	0.347457	0.390745	0.36037	0.454815	0.337208	0.348332	0.379456	0.378325	0.3573	0.400274	0.483351	0.431729	0.365314	0.341118	0.370458	0.442008
	20.1629	0.460099	0.395906	0.432197	0.402571	0.497597	0.557376	0.390445	0.467601	0.388244	0.371815	0.40106	0.434802	0.5838	0.363753	0.327291	0.494497	0.405046	0.416965	0.509758	0.416488	0.524675	0.34823	0.356749	0.596488	0.402687	0.392981	0.406411	0.37696	0.502544	0.400384	0.422749	0.404951	0.358948	0.368552	0.360116	0.448285	0.340622	0.362119	0.37001	0.398393	0.345983	0.339314	0.460769	0.448062	0.385474	0.365665	0.342966	0.454881
	20.1962	0.457267	0.39439	0.387967	0.380624	0.491729	0.54722	0.366052	0.480022	0.389931	0.381295	0.363547	0.416507	0.562523	0.342709	0.354672	0.486641	0.416731	0.379968	0.459425	0.382298	0.469308	0.354886	0.365503	0.584436	0.419461	0.366896	0.359925	0.349792	0.513546	0.397318	0.410969	0.397171	0.352062	0.395403	0.344546	0.44952	0.333337	0.340677	0.342026	0.369525	0.348024	0.340006	0.437577	0.458342	0.373803	0.350727	0.362893	0.457249
	20.2295	0.449848	0.394781	0.403995	0.361308	0.499607	0.539051	0.365426	0.469035	0.39229	0.353773	0.378749	0.418281	0.560962	0.333356	0.348881	0.503352	0.40065	0.378266	0.480474	0.405417	0.487807	0.322294	0.336126	0.591978	0.406942	0.361758	0.359155	0.367803	0.495109	0.359533	0.430777	0.419306	0.349183	0.367339	0.334858	0.451836	0.33913	0.341224	0.334024	0.359266	0.340145	0.386014	0.46729	0.462563	0.392335	0.35925	0.353839	0.4422
	20.2629	0.434866	0.39366	0.416714	0.36554	0.546072	0.522036	0.351692	0.462691	0.41078	0.356356	0.355569	0.450295	0.585922	0.367203	0.367836	0.521149	0.397691	0.384242	0.457238	0.372663	0.544673	0.332194	0.354479	0.548134	0.422568	0.345738	0.370564	0.362536	0.464364	0.392109	0.408025	0.416467	0.346725	0.3969	0.341561	0.445829	0.330882	0.319841	0.335202	0.386622	0.327585	0.398971	0.452044	0.433179	0.386212	0.369935	0.368168	0.454613
	20.2961	0.453627	0.392207	0.39987	0.382967	0.488769	0.563815	0.375749	0.456605	0.407669	0.377504	0.388675	0.39624	0.576878	0.348797	0.36774	0.503503	0.399213	0.374973	0.439135	0.377635	0.512623	0.375233	0.353511	0.563169	0.431896	0.360643	0.348243	0.356496	0.482627	0.434808	0.433057	0.395011	0.344584	0.374727	0.331622	0.440059	0.338367	0.335784	0.339306	0.38979	0.358343	0.382429	0.453033	0.483678	0.407368	0.321806	0.370734	0.455225
	20.3295	0.446136	0.383147	0.408189	0.37673	0.50174	0.545349	0.366163	0.454223	0.406192	0.348728	0.386071	0.401798	0.594941	0.362829	0.32927	0.512691	0.396261	0.372	0.483689	0.395966	0.457725	0.34598	0.324517	0.574724	0.378695	0.340707	0.343789	0.376554	0.470322	0.391539	0.422694	0.397979	0.332341	0.354158	0.330951	0.429051	0.338614	0.336496	0.347886	0.358527	0.320698	0.377172	0.478482	0.466709	0.387564	0.381565	0.371942	0.437732
	20.3629	0.453677	0.377582	0.412668	0.405828	0.510387	0.556482	0.367506	0.447197	0.395272	0.363818	0.357991	0.400805	0.577646	0.356997	0.360231	0.505768	0.391213	0.40369	0.491219	0.391222	0.481603	0.373355	0.333954	0.572495	0.435543	0.387102	0.375662	0.377088	0.493852	0.383536	0.419973	0.416956	0.354032	0.372951	0.35652	0.428746	0.339771	0.337125	0.360483	0.385146	0.349561	0.339567	0.431354	0.43394	0.36313	0.395869	0.337014	0.456588
	20.3962	0.46591	0.38094	0.416778	0.370758	0.52439	0.557052	0.368065	0.461601	0.400789	0.353635	0.380652	0.429241	0.562959	0.353969	0.359624	0.515388	0.366734	0.395812	0.496695	0.394891	0.471042	0.352908	0.356693	0.560148	0.415836	0.367882	0.35609	0.371992	0.486098	0.399589	0.418024	0.394642	0.362101	0.367879	0.347464	0.435665	0.333198	0.334241	0.353448	0.387724	0.352483	0.374961	0.434326	0.409345	0.376617	0.349134	0.37913	0.430904
	20.4295	0.456963	0.384652	0.414216	0.355986	0.489592	0.551451	0.373294	0.431583	0.399336	0.350678	0.35424	0.442166	0.574257	0.371438	0.375364	0.489935	0.398331	0.354016	0.466976	0.415535	0.499578	0.307773	0.375208	0.594883	0.418101	0.363259	0.379004	0.37213	0.485627	0.406939	0.406713	0.408722	0.343947	0.371317	0.348453	0.448392	0.330935	0.347004	0.343813	0.386078	0.361353	0.38031	0.453009	0.40906	0.372297	0.372662	0.355209	0.436257
	20.4629	0.439695	0.402473	0.41261	0.381416	0.495165	0.541018	0.378798	0.446183	0.409491	0.330238	0.34961	0.380125	0.561886	0.350361	0.357063	0.503385	0.389829	0.363485	0.453687	0.409941	0.538283	0.305029	0.364822	0.577046	0.448721	0.373809	0.363008	0.362926	0.479917	0.40607	0.431929	0.391038	0.360479	0.359618	0.372919	0.440448	0.346381	0.338129	0.337312	0.384411	0.343884	0.383048	0.448306	0.467453	0.383724	0.365996	0.343701	0.414171
	20.4962	0.453525	0.381675	0.391252	0.37255	0.503665	0.506913	0.38843	0.464479	0.39163	0.343195	0.342193	0.373599	0.565445	0.321629	0.370476	0.494479	0.361625	0.380056	0.4411	0.397459	0.507531	0.371708	0.356066	0.560623	0.42069	0.383963	0.359603	0.391055	0.483812	0.390276	0.39321	0.379861	0.32372	0.374337	0.338246	0.432683	0.323535	0.359523	0.357471	0.365895	0.352778	0.374829	0.448361	0.400239	0.381116	0.356598	0.374012	0.438884
	20.5295	0.4363	0.3763	0.405448	0.377648	0.513485	0.524339	0.384811	0.43981	0.398834	0.350486	0.346747	0.418162	0.571931	0.358643	0.381665	0.497605	0.392465	0.366498	0.463221	0.387051	0.48847	0.319579	0.357479	0.563768	0.438804	0.358286	0.354664	0.36776	0.484581	0.375934	0.418224	0.394027	0.359272	0.382732	0.343672	0.440259	0.340828	0.354085	0.357626	0.376364	0.342984	0.342684	0.478986	0.405611	0.407606	0.396133	0.342199	0.448
	20.5629	0.469095	0.391848	0.409472	0.381955	0.480678	0.52833	0.372852	0.482836	0.419741	0.35979	0.327159	0.41685	0.57287	0.373549	0.362451	0.483835	0.417319	0.393371	0.470541	0.401719	0.529963	0.393906	0.360322	0.570993	0.449872	0.359106	0.328011	0.373	0.477179	0.389814	0.424701	0.399553	0.356478	0.373943	0.383487	0.436829	0.349973	0.341756	0.327104	0.379152	0.351895	0.399372	0.455632	0.407579	0.386541	0.387906	0.380573	0.447332
	20.5962	0.450279	0.398561	0.387806	0.378639	0.50384	0.531225	0.386308	0.465763	0.407639	0.365087	0.373941	0.400687	0.579542	0.334053	0.359856	0.511183	0.391663	0.366469	0.464334	0.384919	0.558318	0.35758	0.329086	0.550413	0.403904	0.364621	0.34126	0.335495	0.496316	0.40479	0.399084	0.41179	0.377709	0.378707	0.342411	0.44742	0.345004	0.351791	0.350087	0.389397	0.342691	0.385366	0.453137	0.398402	0.373154	0.370583	0.334554	0.449987
	20.6295	0.462111	0.382235	0.397802	0.380716	0.486986	0.521205	0.387945	0.457328	0.416954	0.341006	0.356626	0.410879	0.56922	0.367371	0.340179	0.475176	0.41497	0.365652	0.451027	0.386513	0.491204	0.360988	0.360754	0.549521	0.399703	0.375161	0.35699	0.387986	0.475526	0.408825	0.408349	0.400911	0.353663	0.356566	0.357107	0.445022	0.337878	0.369237	0.356858	0.362238	0.33133	0.372824	0.459461	0.4134	0.374271	0.356352	0.370358	0.448042
	20.6628	0.462121	0.385861	0.403201	0.383959	0.476156	0.544571	0.359171	0.448341	0.406548	0.351049	0.356615	0.414028	0.584236	0.349324	0.345858	0.48227	0.398725	0.362186	0.473488	0.40412	0.508246	0.364566	0.327294	0.578142	0.389832	0.380156	0.373519	0.352914	0.476914	0.404242	0.417653	0.389113	0.337419	0.404358	0.351843	0.462	0.336769	0.355247	0.336327	0.41171	0.337882	0.365864	0.466882	0.457625	0.395163	0.36045	0.368493	0.450276
	20.6962	0.45601	0.376123	0.392117	0.368926	0.511258	0.536115	0.386086	0.450819	0.413913	0.367548	0.396087	0.433868	0.567132	0.376695	0.365951	0.476408	0.387362	0.371068	0.46165	0.394963	0.515098	0.363943	0.338375	0.551545	0.427468	0.381398	0.346801	0.350304	0.480655	0.353096	0.407679	0.398265	0.342753	0.364677	0.334498	0.425094	0.350009	0.371067	0.336959	0.385952	0.331349	0.369563	0.413344	0.446064	0.360192	0.403643	0.361675	0.461956
	20.7294	0.445801	0.384078	0.422949	0.372147	0.529423	0.550054	0.355535	0.457096	0.409027	0.378484	0.336029	0.426327	0.566046	0.347245	0.349079	0.506034	0.394604	0.389033	0.478999	0.392495	0.519743	0.360225	0.333494	0.571339	0.421179	0.371604	0.369789	0.346314	0.468796	0.403505	0.412614	0.396048	0.364294	0.34528	0.329685	0.415368	0.332011	0.343455	0.34087	0.378002	0.32956	0.380403	0.42059	0.414844	0.378775	0.367958	0.387791	0.445705
	20.7629	0.438217	0.387246	0.39547	0.38901	0.482385	0.544618	0.370654	0.453414	0.399718	0.375108	0.370169	0.402133	0.580379	0.348747	0.337755	0.50061	0.394446	0.393336	0.503969	0.407596	0.485299	0.396929	0.347918	0.570908	0.403532	0.352444	0.342261	0.356413	0.465593	0.37064	0.413437	0.41675	0.358907	0.371958	0.34644	0.469102	0.350977	0.334318	0.348738	0.389862	0.332623	0.370075	0.428374	0.436707	0.382596	0.352678	0.36627	0.426187
	20.7962	0.456078	0.369909	0.397611	0.372649	0.486851	0.534556	0.388665	0.452841	0.422346	0.39341	0.322243	0.434516	0.560708	0.329352	0.323537	0.490151	0.420227	0.373385	0.467064	0.388571	0.496872	0.351458	0.356925	0.585835	0.432732	0.390148	0.337413	0.349046	0.475671	0.381851	0.401657	0.40764	0.364306	0.383768	0.353102	0.399859	0.35266	0.343153	0.350246	0.377082	0.337259	0.401115	0.458923	0.450574	0.399491	0.379017	0.363766	0.437993
	20.8295	0.431923	0.378555	0.411187	0.389069	0.487972	0.518227	0.388657	0.45038	0.392762	0.378347	0.356992	0.452253	0.566134	0.341159	0.334995	0.492813	0.43578	0.360707	0.491165	0.409984	0.475558	0.33707	0.333153	0.536535	0.420849	0.364479	0.380336	0.390766	0.455938	0.387095	0.41835	0.40846	0.353859	0.392955	0.340768	0.442967	0.323174	0.323077	0.341154	0.375198	0.346112	0.345051	0.445596	0.424324	0.386373	0.362849	0.35258	0.43028
	20.8628	0.454031	0.392084	0.409567	0.40137	0.488364	0.498494	0.371423	0.448695	0.406928	0.367693	0.358038	0.391292	0.586931	0.353164	0.382724	0.485129	0.412754	0.373413	0.500629	0.403441	0.464742	0.356578	0.362717	0.559307	0.418858	0.364385	0.35807	0.355508	0.459633	0.409477	0.428536	0.400474	0.350859	0.368546	0.332951	0.431796	0.33717	0.311927	0.350364	0.373428	0.338729	0.352756	0.455603	0.440449	0.386905	0.355155	0.3427	0.434998
	20.8961	0.462646	0.387671	0.395857	0.370555	0.480955	0.504542	0.353278	0.490122	0.426585	0.34639	0.378133	0.414647	0.559231	0.349093	0.382882	0.485941	0.375261	0.397795	0.441678	0.39185	0.524731	0.34257	0.367646	0.573178	0.3979	0.367617	0.367425	0.331449	0.456668	0.400582	0.389424	0.407881	0.355883	0.382157	0.361874	0.455062	0.323671	0.363861	0.332107	0.39389	0.325756	0.374192	0.453248	0.444985	0.390929	0.358913	0.360972	0.422791
	20.9295	0.424311	0.374533	0.415045	0.387443	0.495398	0.521189	0.364161	0.45355	0.42846	0.36713	0.329693	0.400695	0.572563	0.332606	0.328003	0.475161	0.407908	0.386351	0.453265	0.37458	0.462297	0.361009	0.3288	0.547287	0.392244	0.414063	0.370024	0.37054	0.446806	0.387314	0.403722	0.379376	0.361582	0.388311	0.327709	0.445115	0.354009	0.347963	0.339987	0.328791	0.350692	0.331083	0.463781	0.431654	0.372755	0.316762	0.363605	0.413101
	20.9629	0.437171	0.391406	0.400102	0.380281	0.467632	0.531767	0.371449	0.487865	0.402693	0.374222	0.345866	0.408307	0.550873	0.343016	0.350959	0.527758	0.422399	0.388111	0.412433	0.431136	0.471438	0.349355	0.345376	0.533046	0.397551	0.382094	0.358583	0.367554	0.442926	0.387636	0.405075	0.405352	0.341973	0.390626	0.342347	0.437438	0.327997	0.345942	0.343353	0.365726	0.351136	0.358704	0.432909	0.435872	0.379472	0.361005	0.346806	0.422548
	20.9962	0.452728	0.390105	0.401099	0.397134	0.501526	0.517938	0.368747	0.459954	0.417341	0.370849	0.328652	0.397675	0.540722	0.357996	0.381478	0.467261	0.404719	0.372753	0.477155	0.387135	0.498595	0.367622	0.360998	0.571687	0.426539	0.360313	0.336403	0.370993	0.465409	0.374424	0.392388	0.39778	0.351482	0.388127	0.340773	0.431467	0.330641	0.335857	0.338201	0.372157	0.329696	0.371387	0.469225	0.428356	0.380664	0.372723	0.352031	0.440461
Figure 5C
	Mb1cre/+	Orai1fl/flMb1cre/+	Orai3fl/fl Mb1cre/+	Orai1/Orai3fl/flMb1cre/+
	1.54775	0.392181	0.987681	0.29641
	0.738394	0.306538	1.29564	0.115811
	1.25902	0.570549	0.72407	0.288904
	0.943586	0.849293	0.907502	0.088198
	1.84455	0.329357	1.00167	0.351623
	1.793	0.368716	0.509422	0.156077
	0.907458	0.172572	2.07588	0.055314
	1.40725	0.189216	0.982952	0.122665
	0.76558	0.538045	1.01942	0.038751
	0.69685	0.561933	1.79744	0.347544
	0.55756	0.404373	0.755542	0.441884
	0.409228	0.141663	1.91627	0.143483
	1.64436	0.450289	0.461282	0.157843
	0.445611	0.209217	1.9156	0.030898
	0.462691	0.510638	0.551037	0.185059
	1.66416	0.746758	1.88437	0.280416
	0.609684	0.247943	2.11674	0.121872
	0.768742	0.4846	1.30045	0.286085
	1.83049	0.330278	1.01157	0.161546
	1.07866	0.318878	0.934488	0.205792
	1.7549	0.404014	1.59744	0.246638
	0.580926	0.360196	1.02404	0.273194
	0.648943	0.213345	1.98794	0.069075
	1.83774	0.183683	1.15491	0.057951
	0.532742	0.208376	1.58455	0.066114
	0.80926	0.201623	0.58774	0.138229
	0.446411	0.858569	0.985208	0.218217
	0.607715	0.511702	0.980019	0.244924
	0.786105	0.375215	0.594814	0.156267
	1.02636	0.238303	1.45004	0.162595
	1.25041	0.154838	0.644563	0.391708
	1.25084	0.317519	1.57359	0.151805
	0.553279	0.225037	0.887131	0.188498
	0.692024	0.340446	1.25021	0.13448
	0.823201	0.53354	1.93084	0.243715
	1.10786	0.213028	1.80972	0.079622
	0.523741	0.257679	1.45606	0.105855
	0.531969	0.412284	0.710215	0.141639
	0.855814	0.254098	1.22938	0.18384
	0.283973	0.354945	0.983517	0.13032
	0.797529	0.183671	1.23995	0.046047
	1.05932	0.341666	1.55235	0.171931
	1.45047	0.258646	0.573369	0.358296
	1.72219	0.468564	1.48413	0.264238
	1.28182	0.827002	0.744512	0.18409
	0.464483	0.358593	1.29919	0.224726
	0.729877	0.192555	1.4822	0.179913
	1.5648	0.60842	0.601619	0.307323
	1.72389	0.395907	0.886407	0.05977
	0.758375	0.331988	0.832474	0.206514
	1.10686	0.297264	1.48506	0.204847
	0.688482	0.628433	1.41442	0.046595
	1.95281	0.273871	1.6806	0.373494
	0.95625	0.410762	1.8857	0.390039
	1.70375	0.264505	1.16182	0.123343
	1.84286	0.228133	1.0527	0.213171
	0.559171	0.362471	1.65768	0.105595
	1.32176	0.157704	0.940787	0.137317
	0.307423	0.538907	0.819513	0.269288
	1.49472	0.467355	2.01543	0.254563
	0.481093	0.187565	0.85827	0.023784
	0.350358	0.31231	0.973211	0.095578
	1.48629	0.162819	0.653543	0.386527
	1.79117	0.143002	1.92727	0.079788
	0.457398	0.197971	1.15914	0.244482
	0.769342	0.064644	0.573264	0.095956
	0.862719	0.080554	1.35789	0.134553
	1.63953	0.20437	1.22104	0.345636
	0.620895	0.156825	0.895432	0.253454
	0.740601	0.163978	0.869038	0.144683
	0.833888	0.47516	0.638662	0.144742
	1.88088	0.18895	1.79189	0.27335
	1.66304	0.191428	1.48257	0.236356
	1.13692	0.109787	1.94907	0.320498
	0.911965	0.191627	0.48188	0.176705
	2.01937	0.142915	0.742515	0.266123
	1.73818	0.311949	1.54253	0.174008
	1.9467	0.277877	0.930334	0.219838
	0.854582	0.166084	1.59347	0.081702
	1.33521	0.240703	1.66823	0.258731
	1.67891	0.388053	1.20084	0.336044
	1.98327	0.32379	0.865777	0.035616
	1.18769	0.45155	0.597387	0.159591
	1.79384	0.23254	1.04642	0.352046
	1.86047	0.274165	1.01162	0.068226
	1.73919	0.332801	2.09613	0.276439
	1.17237	0.271194	1.90281	0.216842
	0.459146	0.318009	0.609683	0.223982
	0.430751	0.310635	0.824893	0.122836
	1.46867	0.21648	0.868844	0.06497
	1.76415	0.431141	1.16485	0.105836
	0.65793	0.799647	1.05949	0.315029
	1.74419	0.439062	1.27341	0.382022
	1.92717	0.368631	1.93915	0.213209
	1.48537	0.295666	1.94923	0.067137
	1.51204	0.236966	1.65271	0.248753
	1.34957	0.311917	0.851571	0.280062
	0.860874	0.251229	0.527525	0.207623
	1.26461	0.144014	0.913054	0.224714
	0.261622	0.354478	1.57052	0.181789
	1.27668	0.240795	0.595429	0.033893
	0.891604	0.457824	0.770658	0.17832
	1.72495	0.425833	0.587842	0.004142
	0.623785	0.280649	0.404704	0.16663
	0.799796	0.281051	0.937185	0.511149
	1.31808	0.314245	1.12875	0.213308
	0.870526	0.373869	1.32245	0.295533
	1.81581	0.23434	0.624804	0.212588
	0.608466	0.393364	1.65442	0.461423
	1.52508	0.107886	1.34872	0.164901
	1.59486	0.288315	0.442664	0.066812
	1.5383	0.222375	0.733673	0.289479
	0.553156	0.69064	0.686462	0.171335
	0.757739	0.36243	1.38609	0.221863
	0.807505	0.34539	1.79494	0.240754
	1.09481	0.264338	1.44209	0.131572
	1.00762	0.207709	1.7298	0.112217
	0.847846	0.202549	1.65789	0.130822
	0.866256	0.246278	0.604872	0.133843
	0.53346	0.52945	1.928	0.251379
	1.83773	0.244294	0.459988	0.106013
	1.561	0.117552	0.737815	0.074083
	1.01067	0.413559	1.50326	0.232225
	1.12115	0.46672	0.385256	0.050251
	1.43243	0.111846	1.22534	0.039407
	1.14176	0.170522	1.35852	0.279446
	0.668776	0.016039	1.67046	0.16377
	0.757887	0.231859	0.631339	0.204131
	1.18234	0.573774	0.526334	0.257717
	1.2338	0.588415	0.593756	0.547573
	1.14312	0.194301	1.55375	0.221455
	1.31363	0.305636	0.476193	0.336622
	1.8546	0.236015	1.17963	0.086373
	1.4687	0.260931	0.141961	0.115585
	0.716099	0.134464	0.742771	0.295592
	0.822319	0.219797	1.53042	0.394476
	1.42805	0.172488	0.907655	0.365444
	0.695644	0.187134	0.229646	0.214363
	1.50828	0.298197	1.76981	0.239454
	1.14172	0.227208	0.416868	0.094847
	1.11633	0.27544	1.07891	0.276173
	1.51719	0.593574	1.50158	0
	0.690816	0.155734	0.563065	0.158602
	1.312	0.212257	1.26649	0.419275
	1.09231	0.460913	0.590411	0.05834
	0.830203	0.373651	0.984204	0.104761
	1.28817	0.467121	0.555392	0.156164
	1.63611	0.115531	0.624202	0.265152
	1.28967	0.367059	0.638393	0.100085
	0.67384	0.092696	1.90707
	0.95729	0.213767	0.832561
	1.71739	0.556474	0.578346
	0.64936	0.432641	0.847588
	0.647057	0.399685	1.61597
	1.50151	0.387523	1.02665
	0.870402	0.356274	1.65893
	1.38149	0.41503	0.396012
	0.960859	0.307503	1.15843
	1.87488	0.287152	0.985489
	1.2873	0.29324	1.98217
	0.438517	0.340614	1.42985
	1.27293	0.451446	1.07587
	1.39555	0.302351	1.46842
	1.22748	0.599664	2.2882
	1.41716	0.465252	1.99464
	1.58481	0.483942	0.461932
	0.659518	0.22403	0.724148
	0.721199	0.243186	1.89381
	0.762875	0.520304	1.09332
	1.95791	0.333423	2.04116
	0.629527	0.211357	0.485521
	1.06649	0.704261	1.27577
	0.470469	0.565465	2.25617
	0.985553	0.3091	2.1067
	0.786454	0.505422	1.5934
	1.4743	0.357619	1.1224
	0.712988	0.55816	1.71153
	0.706886	0.669035	1.5328
	1.13231	0.56202	1.97647
	1.20981	0.265477	0.769461
	0.74433	0.361194	0.959569
	1.24443	0.535268	1.07211
	1.40579	0.310143	1.36937
	1.3547	0.428987	1.27706
	1.49129	0.320238	1.0962
	1.08877	0.737251	0.809459
	1.49487	0.431835	1.16833
	1.4	0.5589	1.88087
	0.939526	0.594636	0.936871
	1.85064	0.60684	1.76228
	1.58588	0.606194	0.920345
	1.36759	0.629072	0.490323
	1.54686	0.609477	0.585443
	1.19586	0.451813	0.846143
	0.85618	0.479283	0.522247
	1.19595	0.242754	0.813611
	0.787436	0.569808	0.844821
	0.51246	0.289519	1.67232
	1.01844	0.453024	0.468903
	1.72551	0.558464
Figure 5D
	Mb1cre/+			Orai1fl/flMb1cre/+			Orai3fl/fl Mb1cre/+			Orai1/Orai3fl/flMb1cre/+
	-0.107	0.0009666	200	-0.01422	0.0005938	200	-0.1268	0.0007982	199	-0.02037	0.0002813	149
Figure 5E
	Orai1			Orai2			Orai3
	Wild type	Orai2-/-		Wild type	Orai2-/-		Wild type	Orai2-/-
	10.809	12.3809		1.38721	0		4.95588	5.24765
	11.3212	12.4266		1.40334	0		5.01453	4.74126
	11.2062	13.2245		1.19083	0		4.93606	4.63631
		12.2982						5.3426
		9.78695						4.71865
		11.996						4.72786
Figure 5F
	Time (min)	Wild type
	0	0.607606	0.634091	1.07025	0.597184	0.589655	0.993255	0.582642	0.538403	0.489382	0.749247	0.661385	0.549467	0.531248	0.603264	0.636673	0.687649	0.592825	0.791664	0.860274	0.661568	0.688503	0.719794	0.537411	0.598295	0.69204	0.721391	0.697974	0.566459	0.579102	0.470789	0.823599	0.682833	0.690525	0.600477	0.702294	0.649768	0.572378	0.767877	0.811898	0.547991	0.599574	0.702978	0.724524	0.725426	0.586666	0.4733	0.787222	0.652221
	0.029633	0.588181	0.631517	1.07537	0.595049	0.568291	0.992779	0.574245	0.551787	0.51715	0.729552	0.656268	0.570559	0.570832	0.633737	0.648094	0.644467	0.569128	0.792047	0.845992	0.630535	0.744025	0.721751	0.549763	0.60164	0.696566	0.718506	0.729997	0.561511	0.55769	0.457845	0.818754	0.703102	0.669483	0.598944	0.714087	0.647405	0.579916	0.793251	0.779116	0.549429	0.615062	0.719168	0.728336	0.787429	0.593049	0.482224	0.734238	0.641836
	0.06305	0.636058	0.65965	1.05489	0.618325	0.572108	0.986351	0.595842	0.541224	0.511472	0.744894	0.647738	0.530303	0.533643	0.614315	0.663409	0.677915	0.594987	0.758307	0.847526	0.661059	0.697988	0.702076	0.552541	0.572411	0.713997	0.742637	0.739782	0.567182	0.542043	0.489874	0.854038	0.713416	0.690191	0.5817	0.667784	0.643164	0.571551	0.839663	0.797045	0.573215	0.639005	0.743927	0.725104	0.765782	0.60426	0.478287	0.80472	0.681445
	0.09635	0.628786	0.637741	1.06734	0.60027	0.590587	1.01738	0.595744	0.543311	0.521305	0.752709	0.644579	0.551806	0.554504	0.636815	0.6751	0.686072	0.577553	0.731382	0.834355	0.638887	0.731734	0.720322	0.529117	0.54242	0.720755	0.704006	0.738867	0.527096	0.559605	0.472491	0.812353	0.696228	0.677285	0.585037	0.698252	0.635714	0.571939	0.81796	0.806421	0.538172	0.67583	0.721931	0.741429	0.786327	0.593067	0.485754	0.782986	0.644885
	0.1297	0.632564	0.649473	1.06087	0.564882	0.533841	1.00553	0.579969	0.518323	0.529232	0.719459	0.649228	0.54492	0.581364	0.626035	0.683956	0.689158	0.572387	0.755118	0.845597	0.639298	0.713494	0.701299	0.548086	0.575216	0.715369	0.711989	0.979549	0.569409	0.557037	0.476493	0.827422	0.727219	0.682127	0.561162	0.717369	0.65079	0.598909	0.836177	0.805152	0.535208	0.684461	0.727413	0.74158	0.806293	0.576147	0.491	0.781172	0.631944
	0.16305	0.645942	0.614589	1.04955	0.568829	0.572577	1.01439	0.603064	0.531681	0.518824	0.727736	0.650499	0.554028	0.539753	0.662256	0.656709	0.710642	0.592801	0.744749	0.849658	0.638575	0.749645	0.739637	0.522731	0.564064	0.689715	0.730323	1.02974	0.537576	0.588639	0.494322	0.76359	0.728455	0.670638	0.568905	0.811119	0.633305	0.581425	0.820409	0.828393	0.573426	0.689746	0.706241	0.743792	0.79172	0.592121	0.485065	0.800717	0.646447
	0.196383	0.628492	0.62671	1.05063	0.581578	0.555777	1.04238	0.603139	0.557303	0.518554	0.735362	0.649228	0.560364	0.578869	0.629857	0.668727	0.726435	0.569318	0.768319	0.90026	0.674483	0.719037	0.722087	0.564942	0.617407	0.730226	0.727871	1.03781	0.545669	0.577869	0.464928	0.805636	0.720469	0.676081	0.588466	0.73995	0.641297	0.584855	0.804624	0.79584	0.528912	0.743597	0.718429	0.756621	0.815642	0.591611	0.488858	0.774476	0.627154
	0.229667	0.6272	0.636578	1.01412	0.587527	0.575036	1.00865	0.575072	0.52068	0.513315	0.724617	0.636199	0.530367	0.574932	0.666587	0.659402	0.78718	0.558905	0.79869	0.843828	0.681815	0.68125	0.668185	0.541251	0.587416	0.698973	0.704013	0.923684	0.549829	0.558068	0.473541	0.797356	0.716483	0.675685	0.572317	0.801573	0.618009	0.578479	0.828822	0.803337	0.535934	0.726564	0.695594	0.763862	0.774207	0.575539	0.48639	0.748515	0.644086
	0.263017	0.628652	0.617956	1.0205	0.577877	0.585327	1.01551	0.613331	0.512787	0.53317	0.73311	0.652969	0.539506	0.567591	0.640063	0.615723	0.803664	0.581063	0.776227	0.86925	0.672571	0.733527	0.687675	0.547191	0.588359	0.691481	0.717045	0.829092	0.553591	0.570578	0.478816	0.781062	0.714573	0.706806	0.538048	0.776373	0.610275	0.595141	0.810945	0.78378	0.547574	0.774106	0.699292	0.763704	0.781706	0.571081	0.478931	0.73316	0.628784
	0.2964	0.625734	0.62665	1.03409	0.584874	0.586024	1.00246	0.588094	0.515262	0.52955	0.739432	0.643406	0.529658	0.563071	0.648324	0.65828	0.809756	0.581603	0.773199	0.868448	0.657859	0.733877	0.711123	0.532859	0.582211	0.712784	0.721174	0.798339	0.53076	0.557596	0.478362	0.826965	0.744947	0.660795	0.560345	0.753679	0.602155	0.59853	0.802531	0.769233	0.530132	0.79284	0.711464	0.726609	0.801904	0.577572	0.47297	0.818834	0.632455
	0.329717	0.620364	0.627914	1.02568	0.595197	0.568033	1.02351	0.606096	0.505112	0.547966	0.754441	0.643355	0.557987	0.574881	0.625536	0.650235	0.873392	0.567218	0.75848	0.872057	0.646903	0.704079	0.725119	0.529242	0.573175	0.700192	0.687705	0.767973	0.545944	0.573486	0.472617	0.837135	0.699057	0.697051	0.578976	0.738828	0.60645	0.610541	0.807622	0.784224	0.542454	0.751063	0.688912	0.753214	0.779314	0.574503	0.484737	0.758208	0.647789
	0.363017	0.623742	0.625489	1.02429	0.595099	0.591357	0.996802	0.596421	0.527658	0.517916	0.752732	0.644086	0.544744	0.5806	0.615108	0.631279	0.909016	0.576629	0.735815	0.845737	0.685516	0.722975	0.699957	0.559082	0.596976	0.708633	0.700188	0.772402	0.559675	0.557682	0.47192	0.842459	0.732431	0.653905	0.597058	0.736379	0.611966	0.565206	0.836099	0.796649	0.528832	0.756554	0.686554	0.74239	0.802739	0.587773	0.488466	0.780465	0.635202
	0.396367	0.637602	0.615272	1.00753	0.596228	0.576003	1.00176	0.608579	0.549326	0.519637	0.743237	0.648522	0.55826	0.571437	0.602681	0.640113	0.936481	0.575039	0.786708	0.8466	0.666586	0.70942	0.746554	0.516347	0.59403	0.692997	0.720044	0.788895	0.523746	0.576208	0.525303	0.811915	0.710633	0.657795	0.674704	0.77702	0.592906	0.533397	0.823124	0.766177	0.582905	0.817642	0.681591	0.738066	0.840832	0.574482	0.500241	0.781509	0.615997
	0.429717	0.621817	0.633714	1.01767	0.599139	0.588119	1.00029	0.611136	0.522012	0.525052	0.739119	0.632815	0.535212	0.560224	0.604367	0.657336	0.928863	0.560724	0.767229	0.829685	0.673833	0.684995	0.713418	0.518434	0.580323	0.695889	0.702138	0.748782	0.551951	0.580832	0.476393	0.795333	0.701561	0.663266	0.625601	0.742558	0.59022	0.572097	0.786015	0.777116	0.552628	0.751618	0.666914	0.753766	0.787653	0.570556	0.495577	0.764437	0.616932
	0.46305	0.634723	0.615963	0.997305	0.576282	0.60634	0.990142	0.603118	0.542961	0.517401	0.738695	0.643317	0.551782	0.571866	0.621456	0.636686	0.890444	0.560333	0.761188	0.824433	0.644654	0.698177	0.699111	0.528836	0.578703	0.696938	0.693286	0.702574	0.544149	0.585404	0.479068	0.835517	0.695827	0.680947	0.606522	0.756625	0.605668	0.573446	0.815837	0.807264	0.547299	0.777078	0.688013	0.724526	0.782404	0.569823	0.483611	0.771193	0.589298
	0.496383	0.640475	0.618766	0.995601	0.566753	0.586295	0.989383	0.603426	0.512033	0.537673	0.727338	0.633641	0.542425	0.553761	0.605495	0.629999	0.987764	0.561949	0.740564	0.848458	0.678205	0.703632	0.746198	0.541563	0.565373	0.674616	0.677581	0.738423	0.546539	0.567073	0.449788	0.801966	0.702594	0.635265	0.622578	0.689277	0.582734	0.559422	0.82004	0.806719	0.531798	0.776871	0.665178	0.733125	0.780915	0.560987	0.481361	0.815801	0.628519
	0.529683	0.633847	0.63243	0.979373	0.579859	0.604766	0.992299	0.595233	0.535361	0.52816	0.714391	0.651805	0.569114	0.563068	0.632417	0.661231	0.94331	0.542405	0.79653	0.855357	0.648118	0.676796	0.723905	0.519873	0.581377	0.701479	0.676312	0.780178	0.541349	0.552838	0.476932	0.845706	0.691875	0.660887	0.609679	0.641077	0.592413	0.573904	0.800201	0.815295	0.540936	0.778998	0.655465	0.746692	0.786519	0.585152	0.474169	0.805788	0.626682
	0.563	0.613107	0.619697	1.00321	0.579733	0.599225	1.01027	0.585824	0.552313	0.5416	0.714274	0.666146	0.536095	0.559496	0.608151	0.642663	0.940586	0.564579	0.745309	0.797222	0.642785	0.668405	0.725855	0.558776	0.579142	0.699561	0.692405	0.833919	0.578169	0.57312	0.498175	0.818939	0.728154	0.641013	0.637325	0.669037	0.599831	0.562024	0.789115	0.773826	0.529116	0.770319	0.647854	0.734727	0.793106	0.575161	0.472444	0.814471	0.614621
	0.596367	0.65524	0.632767	1.00711	0.591983	0.555117	0.997963	0.59393	0.54166	0.549402	0.712021	0.654934	0.529577	0.554223	0.619469	0.660479	0.958562	0.582294	0.753622	0.866297	0.669157	0.693752	0.752294	0.536712	0.578459	0.717001	0.68196	0.802142	0.557144	0.571618	0.484343	0.811923	0.697469	0.649182	0.629278	0.732202	0.605566	0.561963	0.811033	0.785579	0.496987	0.810175	0.656403	0.746353	0.796936	0.577492	0.469059	0.805099	0.627299
	0.629683	0.620451	0.607365	1.00025	0.556278	0.601564	1.01496	0.596555	0.547151	0.551311	0.701621	0.652463	0.53984	0.55142	0.627055	0.632163	0.943719	0.586601	0.762664	0.890781	0.625524	0.655029	0.768547	0.52818	0.594036	0.704908	0.678499	0.819448	0.518607	0.59559	0.502196	0.845626	0.682843	0.649171	0.595071	0.65331	0.597605	0.617911	0.808096	0.796438	0.521244	0.794957	0.660365	0.71365	0.792062	0.58078	0.457353	0.827692	0.647195
	0.663017	0.656999	0.600536	1.02466	0.572778	0.614903	1.009	0.59011	0.553182	0.538969	0.717013	0.652585	0.519164	0.542283	0.625136	0.626633	0.965688	0.583934	0.740785	0.799922	0.638995	0.748893	0.720969	0.539209	0.591797	0.728125	0.689199	0.833673	0.518714	0.57315	0.495696	0.834001	0.677158	0.662656	0.606092	0.650349	0.593853	0.580162	0.805417	0.770241	0.535398	0.807412	0.648201	0.705869	0.75259	0.578284	0.47088	0.778403	0.61858
	0.69635	0.661877	0.613197	0.97371	0.57659	0.612418	0.977523	0.593309	0.522714	0.542008	0.687152	0.653765	0.522263	0.538964	0.657491	0.63844	0.936418	0.559781	0.754062	0.851156	0.619572	0.709939	0.724394	0.539576	0.557278	0.721335	0.676543	0.752295	0.526183	0.623852	0.491977	0.797303	0.707511	0.635009	0.58818	0.658365	0.597661	0.595419	0.790276	0.758415	0.50922	0.825118	0.658475	0.744082	0.73098	0.577271	0.457533	0.771573	0.625079
	0.729667	0.637563	0.608141	0.975211	0.591054	0.601286	0.980428	0.5695	0.53784	0.518562	0.69522	0.650165	0.511764	0.52741	0.619706	0.622247	0.963273	0.581557	0.72238	0.841127	0.669313	0.713409	0.727222	0.538541	0.578423	0.698237	0.69329	0.734802	0.514808	0.588355	0.487256	0.796458	0.694968	0.643186	0.658169	0.590031	0.582326	0.574591	0.792833	0.788412	0.500193	0.843172	0.657251	0.717089	0.71237	0.582038	0.457372	0.810745	0.613624
	0.763017	0.65199	0.596926	0.99874	0.582435	0.566436	1.00196	0.598581	0.554653	0.563318	0.684139	0.64709	0.520358	0.541196	0.609812	0.646907	0.939009	0.577364	0.758516	0.840201	0.649752	0.732109	0.727305	0.50178	0.568228	0.719265	0.683956	0.722022	0.503801	0.617583	0.488406	0.830022	0.699339	0.652529	0.72422	0.625513	0.591608	0.605318	0.766137	0.766479	0.495611	0.851922	0.678252	0.738085	0.699523	0.550237	0.455748	0.801502	0.606826
	0.7964	0.67123	0.600666	0.977161	0.556676	0.56581	0.971832	0.573801	0.523992	0.523303	0.688786	0.633851	0.525704	0.545249	0.607004	0.634944	0.961636	0.57273	0.738322	0.800861	0.64257	0.700455	0.6928	0.491226	0.583577	0.735111	0.696411	0.726946	0.520243	0.600692	0.48012	0.802136	0.692546	0.634666	0.666324	0.665541	0.595962	0.566589	0.80674	0.7743	0.494704	0.807781	0.693107	0.717225	0.709876	0.585689	0.46272	0.794624	0.609339
	0.82965	0.724586	0.596056	0.957164	0.559263	0.588391	1.01261	0.59437	0.533796	0.542207	0.694561	0.654859	0.534235	0.549249	0.619833	0.624286	0.971637	0.546062	0.732313	0.886928	0.628623	0.693347	0.689354	0.50671	0.572243	0.714167	0.692744	0.817513	0.518844	0.602274	0.494155	0.848575	0.690706	0.678942	0.705349	0.648844	0.60021	0.540718	0.812473	0.745931	0.510906	0.843276	0.672974	0.704856	0.702405	0.597876	0.443015	0.813018	0.630047
	0.863	0.753323	0.601956	0.965484	0.586672	0.584262	0.990303	0.572669	0.54236	0.555314	0.735665	0.669902	0.509031	0.531476	0.598385	0.619325	0.96255	0.557142	0.747051	0.858212	0.662631	0.702762	0.73047	0.518973	0.611804	0.730343	0.661358	0.822323	0.516748	0.602116	0.476803	0.833169	0.702668	0.65725	0.61645	0.671927	0.59579	0.553076	0.825057	0.761679	0.493169	0.910433	0.668872	0.70692	0.70725	0.576256	0.466479	0.789883	0.629015
	0.896367	0.68713	0.606168	0.968769	0.591694	0.548539	0.968983	0.575486	0.513777	0.516114	0.724253	0.638132	0.532119	0.536419	0.61139	0.628754	0.973703	0.589596	0.737677	0.877416	0.628499	0.701942	0.699112	0.481248	0.604418	0.723001	0.687469	0.815645	0.507239	0.584902	0.458286	0.838469	0.682663	0.668793	0.579361	0.607674	0.574805	0.587447	0.762479	0.741567	0.520461	0.868002	0.687789	0.718578	0.702453	0.624617	0.441033	0.790385	0.625334
	0.929667	0.658594	0.5936	0.942098	0.594173	0.566081	0.962827	0.564447	0.490393	0.521998	0.689235	0.615279	0.510913	0.507682	0.585301	0.631995	0.945727	0.545264	0.706588	0.856128	0.581627	0.678994	0.701749	0.481876	0.597132	0.681966	0.682755	0.800246	0.516219	0.604988	0.471832	0.794122	0.640968	0.675502	0.566948	0.576112	0.57721	0.580735	0.746265	0.735955	0.497363	0.848399	0.686416	0.721118	0.700654	0.591066	0.428881	0.76648	0.592278
	0.963	0.658594	0.5936	0.942098	0.594173	0.566081	0.962827	0.564447	0.490393	0.521998	0.689235	0.615279	0.510913	0.507682	0.585301	0.631995	0.945727	0.545264	0.706588	0.856128	0.581627	0.678994	0.701749	0.481876	0.597132	0.681966	0.682755	0.800246	0.516219	0.604988	0.471832	0.794122	0.640968	0.675502	0.566948	0.576112	0.57721	0.580735	0.746265	0.735955	0.497363	0.848399	0.686416	0.721118	0.700654	0.591066	0.428881	0.76648	0.592278
	0.99635	0.664766	0.60118	0.962999	0.576705	0.579873	0.985636	0.598611	0.510779	0.500934	0.684761	0.626052	0.511258	0.523518	0.60019	0.62767	0.909173	0.550145	0.721577	0.877896	0.594687	0.698413	0.699786	0.488632	0.574813	0.683387	0.659691	0.927181	0.505524	0.569688	0.460659	0.794216	0.649045	0.649485	0.556292	0.617805	0.566831	0.551711	0.770494	0.746959	0.519317	0.816172	0.65185	0.682667	0.685074	0.549985	0.429252	0.747128	0.593192
	1.02968	0.614709	0.576213	0.954748	0.54348	0.546746	0.958948	0.551619	0.49033	0.493112	0.666232	0.613831	0.491513	0.504634	0.565767	0.595543	0.869687	0.527786	0.690806	0.799283	0.582461	0.65634	0.68699	0.498129	0.55146	0.682081	0.644574	0.923667	0.503763	0.551299	0.473003	0.747599	0.642061	0.643601	0.543734	0.586329	0.563489	0.54803	0.725535	0.753667	0.504481	0.760736	0.627629	0.670224	0.666114	0.546581	0.422227	0.700261	0.553394
	1.063	0.607631	0.563005	0.917372	0.546193	0.481613	0.940355	0.563909	0.47577	0.500503	0.66969	0.620611	0.488136	0.480215	0.564444	0.587658	0.832609	0.539361	0.664439	0.772244	0.582472	0.670791	0.65995	0.512237	0.524464	0.662699	0.661643	0.897251	0.471543	0.544432	0.454157	0.727542	0.623735	0.622498	0.557414	0.600505	0.552225	0.535537	0.728069	0.739636	0.468793	0.750188	0.606616	0.638317	0.638277	0.52184	0.420729	0.741661	0.549422
	1.09632	0.606611	0.540346	0.908648	0.531781	0.492717	0.946279	0.532927	0.477733	0.492326	0.666152	0.603842	0.482123	0.488625	0.570655	0.583721	0.784827	0.501561	0.650302	0.781819	0.580614	0.651933	0.640717	0.505247	0.545258	0.670105	0.642089	0.883438	0.470235	0.535094	0.467493	0.704023	0.619459	0.606648	0.614757	0.575539	0.536713	0.516746	0.693201	0.714453	0.476169	0.742198	0.596047	0.661295	0.633325	0.535894	0.424836	0.670412	0.55207
	1.12968	0.569414	0.552662	0.926727	0.530134	0.474588	0.933703	0.510489	0.474249	0.482107	0.646532	0.589944	0.458701	0.464439	0.556213	0.552425	0.806332	0.514517	0.637889	0.777256	0.566111	0.617486	0.648283	0.491109	0.524449	0.641336	0.626513	0.818804	0.47959	0.536085	0.433983	0.687497	0.601792	0.605889	0.68459	0.570034	0.526343	0.511242	0.693251	0.722761	0.457777	0.71618	0.59027	0.636869	0.616095	0.506347	0.399166	0.719208	0.550154
	1.16303	0.568316	0.547719	0.913451	0.521667	0.466102	0.899601	0.521958	0.473342	0.472082	0.647099	0.587628	0.49459	0.479363	0.560739	0.55583	0.759344	0.518244	0.626046	0.764004	0.535307	0.622962	0.639084	0.480938	0.581627	0.631957	0.621632	0.754812	0.473957	0.542119	0.431046	0.718304	0.586862	0.587739	0.717999	0.554705	0.529616	0.524532	0.676398	0.710642	0.452992	0.735289	0.58418	0.611065	0.625679	0.5143	0.413429	0.681414	0.534677
	1.19635	0.547075	0.535954	0.912742	0.53075	0.483233	0.908984	0.492125	0.442173	0.48191	0.61539	0.584893	0.461321	0.483803	0.54564	0.563042	0.760311	0.506549	0.642621	0.761944	0.547989	0.623522	0.658	0.480064	0.529194	0.640369	0.617539	0.724526	0.47276	0.515045	0.447334	0.667072	0.590823	0.598112	0.65621	0.565818	0.531118	0.510682	0.670958	0.683981	0.473301	0.678954	0.571448	0.633908	0.611622	0.517064	0.397572	0.681113	0.5452
	1.22968	0.545015	0.517156	0.879804	0.514982	0.461906	0.89139	0.531354	0.46285	0.468412	0.648188	0.577116	0.468794	0.460264	0.540641	0.564889	0.747423	0.500996	0.607399	0.758119	0.521966	0.644509	0.610214	0.506641	0.522824	0.62748	0.587745	0.694404	0.449517	0.529853	0.428923	0.662037	0.556959	0.611387	0.617753	0.567652	0.527799	0.513904	0.657487	0.683206	0.44204	0.623941	0.555244	0.609509	0.605055	0.494391	0.407845	0.680943	0.564883
	1.26302	0.51619	0.520901	0.887425	0.514346	0.476036	0.890015	0.517545	0.43695	0.476191	0.645766	0.583182	0.469014	0.444902	0.537661	0.548797	0.702027	0.476095	0.613784	0.727866	0.512151	0.612627	0.628987	0.467771	0.519477	0.628551	0.600884	0.649391	0.481498	0.529365	0.413872	0.713685	0.57307	0.601609	0.597747	0.56553	0.502772	0.499851	0.625143	0.70119	0.423778	0.693262	0.551297	0.603662	0.602111	0.503354	0.386967	0.664117	0.530727
	1.29637	0.516025	0.508669	0.88055	0.513631	0.45567	0.906179	0.49994	0.420571	0.485581	0.632693	0.579791	0.47338	0.45074	0.54172	0.543046	0.739666	0.496448	0.605838	0.732191	0.53145	0.627015	0.623101	0.484878	0.53792	0.61077	0.576268	0.673736	0.466802	0.524615	0.432715	0.666132	0.577248	0.573496	0.553529	0.544954	0.496397	0.518278	0.628887	0.662457	0.454289	0.670463	0.547344	0.611713	0.594052	0.502394	0.390276	0.655175	0.543603
	1.32963	0.527295	0.498937	0.868186	0.467414	0.48044	0.883631	0.499244	0.428663	0.451126	0.600636	0.575864	0.470362	0.43808	0.552181	0.517367	0.703345	0.481614	0.602037	0.705279	0.535128	0.58539	0.599394	0.472724	0.516625	0.618428	0.575389	0.647814	0.445536	0.529595	0.433162	0.649299	0.547357	0.560843	0.537585	0.522871	0.511355	0.503723	0.622619	0.640971	0.426053	0.62742	0.519486	0.59759	0.595647	0.494559	0.384713	0.654696	0.51163
	1.363	0.501651	0.483899	0.872663	0.471711	0.476988	0.859799	0.501978	0.453596	0.483536	0.608466	0.572024	0.463354	0.459743	0.548679	0.513418	0.685713	0.497684	0.606608	0.702006	0.507022	0.586525	0.583435	0.477231	0.519412	0.612787	0.577063	0.69035	0.442044	0.538293	0.412403	0.646023	0.550566	0.57347	0.542738	0.510228	0.492904	0.481041	0.609585	0.648628	0.453806	0.599862	0.546931	0.596821	0.578261	0.506819	0.396966	0.67179	0.503769
	1.39635	0.517339	0.492433	0.85549	0.494406	0.471674	0.857154	0.488909	0.429717	0.461355	0.619126	0.569908	0.439788	0.444108	0.524024	0.499501	0.711103	0.490087	0.591029	0.69315	0.496857	0.544044	0.596232	0.444752	0.524308	0.620934	0.568655	0.702538	0.461776	0.520703	0.401006	0.634412	0.530351	0.577265	0.545551	0.50597	0.491791	0.523844	0.613283	0.656662	0.448243	0.615133	0.515676	0.579985	0.540466	0.48492	0.37515	0.654141	0.49413
	1.42968	0.489428	0.491176	0.853	0.479028	0.470539	0.850411	0.4658	0.420603	0.463815	0.596935	0.562047	0.436164	0.440259	0.519358	0.534772	0.671853	0.486553	0.57349	0.645729	0.512418	0.569619	0.590943	0.460733	0.503428	0.568789	0.563117	0.638837	0.442473	0.549203	0.401888	0.671415	0.520259	0.557775	0.557919	0.495116	0.495072	0.498346	0.597137	0.635071	0.431162	0.583379	0.521287	0.560701	0.546117	0.501475	0.374206	0.688308	0.485718
	1.46302	0.49415	0.479624	0.846954	0.476414	0.472773	0.849044	0.490344	0.43611	0.458443	0.616342	0.550995	0.461667	0.439341	0.497253	0.504595	0.638727	0.469239	0.591308	0.671635	0.521075	0.543914	0.587698	0.442605	0.517913	0.578446	0.551772	0.70869	0.437181	0.581796	0.407291	0.642875	0.536139	0.558159	0.531346	0.527395	0.490662	0.475344	0.592603	0.627396	0.408266	0.595834	0.51153	0.573355	0.547609	0.487689	0.382737	0.678715	0.508685
	1.49632	0.483779	0.472116	0.846038	0.467038	0.452468	0.855962	0.477856	0.407847	0.458752	0.594011	0.555487	0.45019	0.43694	0.515045	0.496828	0.673904	0.488158	0.551174	0.628218	0.51183	0.531807	0.592329	0.467737	0.525479	0.57764	0.545097	0.653904	0.427291	0.572108	0.399237	0.624903	0.522594	0.557255	0.529441	0.496456	0.481391	0.513862	0.578875	0.644946	0.42599	0.549977	0.503187	0.584989	0.54172	0.490917	0.37931	0.642144	0.481479
	1.52967	0.474285	0.47512	0.812012	0.478074	0.445703	0.835062	0.459382	0.395333	0.445871	0.580932	0.551331	0.440607	0.427691	0.516922	0.490857	0.64182	0.474455	0.574763	0.65664	0.519004	0.544427	0.586117	0.461575	0.50297	0.557249	0.548838	0.668339	0.44034	0.589806	0.407984	0.570656	0.524263	0.543667	0.528652	0.503939	0.487217	0.491443	0.573529	0.671548	0.420369	0.557511	0.498987	0.560217	0.554984	0.482055	0.370087	0.598647	0.488287
	1.56302	0.485204	0.460244	0.820334	0.458774	0.433687	0.8151	0.447859	0.401237	0.446547	0.603646	0.553138	0.438898	0.441041	0.502096	0.480254	0.64272	0.478452	0.554905	0.637953	0.509162	0.532675	0.58015	0.435572	0.510873	0.555703	0.521776	0.624357	0.418731	0.726458	0.402204	0.573131	0.491533	0.539061	0.49235	0.522672	0.498398	0.462956	0.556042	0.630733	0.408652	0.545766	0.502208	0.546649	0.551186	0.466116	0.375231	0.64081	0.481429
	1.59633	0.466717	0.469995	0.83358	0.463482	0.441648	0.815322	0.466842	0.397245	0.464095	0.586357	0.556531	0.435188	0.45006	0.515096	0.494578	0.645686	0.466029	0.558952	0.625422	0.513179	0.525703	0.566722	0.46313	0.496709	0.571416	0.537638	0.608087	0.415377	0.759303	0.392734	0.526695	0.507904	0.529998	0.489001	0.529907	0.497177	0.470044	0.550453	0.62952	0.429703	0.569279	0.49309	0.556134	0.55036	0.490932	0.367164	0.613824	0.49686
	1.62967	0.446072	0.463933	0.81721	0.452151	0.432219	0.798054	0.436495	0.402286	0.440497	0.568071	0.545554	0.435562	0.42097	0.491079	0.483371	0.622966	0.474358	0.551964	0.620742	0.506225	0.542124	0.565504	0.462215	0.493866	0.5582	0.515366	0.56036	0.416529	0.701616	0.364097	0.572798	0.489857	0.515301	0.468604	0.506778	0.47193	0.46544	0.550128	0.616995	0.417189	0.551486	0.467265	0.546031	0.514827	0.481221	0.365994	0.661263	0.473076
	1.66302	0.444042	0.465322	0.809575	0.459686	0.447426	0.795875	0.450667	0.395808	0.457925	0.568747	0.542973	0.437618	0.450413	0.512733	0.47457	0.619627	0.459428	0.5374	0.607251	0.513592	0.499587	0.554644	0.44757	0.50904	0.546987	0.516405	0.591524	0.432655	0.629354	0.382101	0.548357	0.486641	0.542793	0.47216	0.497614	0.465316	0.478376	0.568814	0.609738	0.41814	0.560607	0.476386	0.568992	0.514341	0.475504	0.351373	0.583808	0.467042
	1.69637	0.434532	0.466225	0.816621	0.458332	0.443192	0.802668	0.445099	0.3923	0.443836	0.548488	0.539842	0.436399	0.404802	0.497772	0.507578	0.628412	0.49157	0.5251	0.611819	0.498194	0.544129	0.575632	0.456938	0.490992	0.572402	0.502478	0.578669	0.446199	0.58573	0.379585	0.516915	0.484801	0.54134	0.461017	0.49382	0.476818	0.452032	0.519185	0.587824	0.416384	0.537753	0.477087	0.527473	0.534965	0.469334	0.369217	0.614964	0.479778
	1.72968	0.436442	0.454668	0.804641	0.472913	0.451866	0.79443	0.452898	0.392282	0.436841	0.549014	0.528749	0.436291	0.415878	0.469557	0.498524	0.614197	0.468367	0.536921	0.580206	0.511108	0.529289	0.55442	0.472007	0.456688	0.531347	0.514424	0.600755	0.414333	0.558562	0.367124	0.549687	0.492207	0.520453	0.444101	0.484785	0.456728	0.455851	0.52599	0.594632	0.420421	0.547984	0.481341	0.533352	0.516845	0.450585	0.357798	0.607975	0.448959
	1.763	0.44086	0.461083	0.825305	0.444313	0.432816	0.797203	0.4546	0.416645	0.436807	0.581311	0.542688	0.424613	0.419466	0.47769	0.483916	0.614787	0.465978	0.551165	0.567031	0.501445	0.541169	0.566401	0.438733	0.487111	0.512815	0.491133	0.623684	0.412508	0.547971	0.361622	0.544429	0.464965	0.525721	0.452726	0.529352	0.46731	0.445245	0.526103	0.603549	0.420253	0.532529	0.472078	0.526303	0.513796	0.471665	0.361747	0.601094	0.467392
	1.79633	0.462112	0.445157	0.817041	0.45306	0.442662	0.788624	0.44887	0.396677	0.433703	0.571243	0.544889	0.452213	0.435989	0.471711	0.470548	0.645867	0.440847	0.520992	0.603147	0.502924	0.528645	0.528962	0.4574	0.49292	0.537182	0.506585	0.64959	0.432669	0.531317	0.361179	0.535411	0.478446	0.50391	0.429776	0.53833	0.473092	0.460648	0.510856	0.579366	0.391664	0.51669	0.480437	0.530584	0.507978	0.478476	0.361199	0.596318	0.488473
	1.82963	0.430721	0.440473	0.783319	0.436581	0.439609	0.762385	0.434164	0.390067	0.428886	0.540122	0.535655	0.424634	0.411137	0.485074	0.491854	0.627933	0.436694	0.531784	0.598381	0.499626	0.521522	0.527984	0.45175	0.497098	0.546733	0.493182	0.596572	0.426951	0.498826	0.374096	0.564731	0.461219	0.522207	0.409878	0.541973	0.44653	0.438774	0.534106	0.55408	0.408239	0.505228	0.465052	0.528178	0.475708	0.447216	0.367449	0.62903	0.472851
	1.86302	0.417553	0.41733	0.789897	0.41857	0.410331	0.757583	0.426001	0.394415	0.415639	0.53388	0.508758	0.425072	0.399999	0.468247	0.481456	0.5855	0.438358	0.505369	0.551231	0.471182	0.497682	0.530079	0.455259	0.460704	0.525733	0.483627	0.591552	0.425997	0.47159	0.371441	0.517695	0.444374	0.481083	0.384533	0.516421	0.440167	0.42433	0.499168	0.548526	0.399929	0.496915	0.46406	0.51443	0.475484	0.461119	0.350679	0.617385	0.454039
	1.8964	0.415003	0.425342	0.804632	0.43542	0.401317	0.776039	0.425223	0.381748	0.431832	0.541181	0.533701	0.414158	0.404874	0.455637	0.442017	0.577652	0.450538	0.530617	0.543578	0.471642	0.509655	0.52539	0.444851	0.446189	0.517328	0.486623	0.583694	0.413505	0.460781	0.357142	0.508301	0.456387	0.497795	0.399555	0.503343	0.451785	0.478013	0.491422	0.56352	0.388603	0.490295	0.454568	0.496537	0.498089	0.437296	0.350043	0.596082	0.463036
	1.92963	0.426943	0.442138	0.855139	0.449743	0.438138	0.836564	0.449978	0.390013	0.434655	0.565397	0.550758	0.437694	0.411958	0.487317	0.483759	0.584906	0.443268	0.511227	0.600986	0.517591	0.526374	0.538184	0.429519	0.485855	0.544397	0.478972	0.596529	0.405782	0.469421	0.375359	0.530764	0.463509	0.520146	0.394332	0.504935	0.4605	0.462022	0.525903	0.609331	0.42658	0.525821	0.439929	0.542028	0.492997	0.433694	0.366438	0.622254	0.464967
	1.963	0.41243	0.45425	0.965675	0.464021	0.42219	0.925445	0.475188	0.386324	0.457577	0.603511	0.596718	0.46624	0.429962	0.496327	0.492767	0.587251	0.474386	0.571858	0.629268	0.525389	0.539397	0.586151	0.45584	0.508509	0.59809	0.495712	0.585464	0.422395	0.487084	0.369548	0.573841	0.50268	0.56442	0.413251	0.504388	0.456973	0.505109	0.51618	0.653946	0.406951	0.540123	0.457212	0.548447	0.474042	0.463942	0.358893	0.644153	0.491254
	1.99635	0.421267	0.451179	1.11807	0.435746	0.434591	1.01499	0.472537	0.380502	0.471267	0.623166	0.620108	0.488909	0.41832	0.510344	0.5148	0.622738	0.408641	0.57233	0.623133	0.516329	0.541185	0.569023	0.492311	0.534216	0.611344	0.50843	0.584304	0.421609	0.522353	0.375091	0.587553	0.498118	0.588611	0.408091	0.521463	0.472443	0.561982	0.518971	0.684419	0.43939	0.509625	0.441954	0.580723	0.50998	0.47791	0.363431	0.689586	0.498931
	2.02968	0.423893	0.490297	1.19755	0.471327	0.406647	1.07155	0.500615	0.397123	0.471031	0.634471	0.660044	0.474125	0.428442	0.517829	0.518763	0.623778	0.463705	0.617473	0.662544	0.518616	0.544038	0.617631	0.484192	0.524401	0.680842	0.516474	0.571724	0.423333	0.570867	0.372511	0.594007	0.503091	0.569966	0.418239	0.538668	0.475685	0.574595	0.518372	0.708775	0.441379	0.522542	0.453244	0.578442	0.502299	0.476254	0.363391	0.726852	0.493827
	2.06303	0.414466	0.483526	1.27414	0.467078	0.434602	1.11515	0.520817	0.388254	0.48795	0.675116	0.681857	0.491279	0.441139	0.504434	0.517449	0.61456	0.48165	0.602861	0.641471	0.549246	0.577449	0.639531	0.480636	0.567958	0.698676	0.513322	0.552495	0.433564	0.60232	0.368459	0.5952	0.512702	0.620508	0.40448	0.547244	0.501349	0.601866	0.542389	0.677624	0.396552	0.537964	0.461168	0.593498	0.509105	0.481493	0.377065	0.745177	0.517131
	2.09637	0.437272	0.476077	1.39237	0.471747	0.467306	1.1366	0.524053	0.417681	0.491774	0.702393	0.714274	0.530069	0.448329	0.533917	0.529331	0.66011	0.512106	0.632886	0.65584	0.547721	0.57041	0.647143	0.475506	0.589378	0.731613	0.508022	0.578359	0.423633	0.604677	0.372664	0.63621	0.541076	0.649653	0.423429	0.559793	0.485817	0.645676	0.552616	0.663578	0.41092	0.534189	0.457055	0.621112	0.51486	0.485466	0.370331	0.751767	0.524701
	2.12967	0.433326	0.492148	1.43745	0.478079	0.463036	1.16146	0.528298	0.406078	0.518537	0.709807	0.732443	0.533025	0.443181	0.536478	0.526058	0.639523	0.50354	0.628431	0.640114	0.560755	0.582632	0.630009	0.487165	0.579512	0.726162	0.519417	0.576231	0.427436	0.625298	0.360011	0.59659	0.507547	0.663608	0.416162	0.520155	0.505084	0.648569	0.536869	0.65546	0.393466	0.531301	0.484073	0.652217	0.509979	0.521762	0.38293	0.766733	0.524345
	2.16302	0.447416	0.497367	1.44292	0.475127	0.441368	1.12546	0.522902	0.388883	0.514094	0.737222	0.758981	0.536316	0.45737	0.52665	0.506823	0.659117	0.527464	0.645723	0.631913	0.547889	0.579173	0.635879	0.531278	0.567028	0.731012	0.547335	0.533777	0.429144	0.622233	0.35067	0.588657	0.507237	0.647624	0.409765	0.559279	0.500295	0.649909	0.539217	0.658548	0.431922	0.5491	0.479372	0.646341	0.523537	0.506837	0.371743	0.75854	0.546784
	2.19635	0.418364	0.484909	1.42931	0.461478	0.430942	1.14783	0.517254	0.407836	0.520875	0.710937	0.781492	0.526345	0.44881	0.520388	0.498362	0.65953	0.528552	0.638674	0.627875	0.571637	0.562914	0.637897	0.528233	0.538687	0.746228	0.503613	0.532448	0.427182	0.634439	0.354106	0.571863	0.512287	0.667163	0.395907	0.551832	0.484296	0.616064	0.505464	0.620019	0.406172	0.514301	0.458042	0.62445	0.502924	0.510573	0.361273	0.765114	0.519463
	2.22967	0.416176	0.474619	1.45712	0.46794	0.437001	1.18271	0.53118	0.401911	0.511368	0.721617	0.782719	0.528153	0.43496	0.536726	0.49366	0.642242	0.517144	0.652761	0.595297	0.544427	0.59085	0.655366	0.554668	0.563458	0.733288	0.509823	0.526437	0.424452	0.6379	0.357856	0.590087	0.503899	0.652674	0.397826	0.523885	0.4966	0.580923	0.526035	0.611256	0.414353	0.519831	0.470978	0.631086	0.508583	0.504173	0.355629	0.818306	0.507038
	2.263	0.426265	0.478073	1.46427	0.460257	0.443414	1.15086	0.493244	0.396413	0.493076	0.73837	0.799109	0.547177	0.435083	0.535482	0.486342	0.658586	0.540272	0.629103	0.608937	0.54404	0.57948	0.648555	0.545919	0.577243	0.73335	0.498848	0.506776	0.425484	0.621294	0.348588	0.572402	0.489421	0.697031	0.388021	0.537366	0.508194	0.585441	0.503107	0.584962	0.403087	0.499667	0.456728	0.630326	0.50786	0.490827	0.350181	0.83807	0.549484
	2.29637	0.396874	0.479767	1.51276	0.464761	0.423126	1.17541	0.506025	0.411622	0.503197	0.671396	0.802089	0.561814	0.434063	0.543992	0.520202	0.662056	0.506157	0.633662	0.583979	0.540126	0.551854	0.620128	0.513225	0.556946	0.732944	0.498857	0.490343	0.433495	0.651333	0.373285	0.576917	0.495381	0.660194	0.40269	0.546191	0.481746	0.566787	0.51797	0.593004	0.399086	0.550096	0.443876	0.620938	0.494434	0.515562	0.360941	0.759342	0.524345
	2.32963	0.403888	0.482439	1.47195	0.452243	0.434155	1.15539	0.496135	0.382004	0.516645	0.707653	0.797881	0.551928	0.439936	0.52236	0.49284	0.661332	0.506016	0.636947	0.559146	0.538029	0.558537	0.637224	0.544412	0.568695	0.730238	0.508459	0.465184	0.41682	0.643542	0.362624	0.58417	0.480854	0.624899	0.361178	0.555613	0.480013	0.574858	0.519744	0.566802	0.405206	0.502493	0.453172	0.614639	0.496155	0.516152	0.355381	0.766887	0.505517
	2.363	0.408635	0.465656	1.49345	0.446443	0.431924	1.14222	0.476654	0.371961	0.506379	0.694139	0.802688	0.522172	0.422246	0.554995	0.474628	0.64653	0.500948	0.623345	0.563182	0.536877	0.536755	0.623838	0.526085	0.552631	0.723508	0.505	0.445616	0.426677	0.632881	0.366105	0.537848	0.479082	0.646555	0.36449	0.522326	0.480082	0.507893	0.503445	0.56856	0.418923	0.481249	0.440566	0.612158	0.485532	0.515917	0.35965	0.738455	0.513244
	2.39633	0.403988	0.457653	1.4363	0.463195	0.440159	1.12283	0.467286	0.39053	0.494664	0.704876	0.831673	0.533026	0.427965	0.512187	0.495643	0.610808	0.485336	0.606157	0.544466	0.546162	0.534677	0.61648	0.509066	0.553059	0.690111	0.490024	0.459034	0.418797	0.608655	0.359389	0.564092	0.476536	0.630511	0.357256	0.527087	0.466543	0.517501	0.510083	0.557878	0.409989	0.492101	0.430002	0.581516	0.494657	0.508274	0.347001	0.723734	0.49346
	2.42968	0.382458	0.442209	1.46297	0.440998	0.420861	1.11275	0.473843	0.400008	0.489865	0.682912	0.802613	0.55382	0.434101	0.502968	0.491714	0.61668	0.504688	0.625422	0.542855	0.522804	0.519713	0.585388	0.523221	0.560303	0.664846	0.493096	0.446496	0.410028	0.605048	0.345577	0.559306	0.47862	0.60402	0.367684	0.52495	0.473271	0.497934	0.483621	0.549145	0.388235	0.50566	0.443365	0.586642	0.486183	0.489031	0.343957	0.758952	0.506525
	2.463	0.403128	0.445736	1.45297	0.453315	0.442475	1.09728	0.464149	0.376031	0.493607	0.683607	0.786384	0.528221	0.434514	0.507633	0.476364	0.593992	0.510331	0.5973	0.530227	0.507127	0.497578	0.575167	0.495319	0.538278	0.644885	0.491375	0.451719	0.40593	0.624063	0.340733	0.51912	0.447932	0.618784	0.358696	0.496872	0.475952	0.483212	0.500887	0.518939	0.407455	0.480504	0.439865	0.569575	0.473073	0.481952	0.346313	0.757384	0.485293
	2.49633	0.395585	0.433786	1.44076	0.428321	0.414134	1.1088	0.454659	0.367617	0.486034	0.665858	0.806059	0.514349	0.426597	0.500864	0.4573	0.605888	0.485765	0.588187	0.511055	0.534827	0.518465	0.567657	0.53295	0.520761	0.654418	0.469261	0.44253	0.409042	0.614434	0.359105	0.531166	0.443063	0.599221	0.351435	0.554454	0.460558	0.461681	0.487531	0.532309	0.407977	0.483382	0.40988	0.567102	0.477676	0.48626	0.343576	0.743858	0.506625
	2.52972	0.388297	0.417478	1.40576	0.437319	0.424062	1.07874	0.455704	0.367733	0.494532	0.682924	0.779018	0.502161	0.395358	0.489855	0.45845	0.616747	0.483855	0.541903	0.514654	0.518841	0.472118	0.611953	0.523721	0.525759	0.633582	0.454144	0.438705	0.399527	0.612047	0.34771	0.459376	0.427706	0.627263	0.356854	0.522047	0.472171	0.457508	0.480228	0.502773	0.394007	0.463738	0.420659	0.561734	0.463766	0.480063	0.332456	0.706474	0.478617
	2.56302	0.387447	0.412989	1.34792	0.428264	0.390865	1.06672	0.442281	0.376874	0.482219	0.643902	0.785982	0.525663	0.413375	0.483529	0.488093	0.607697	0.449907	0.551388	0.494097	0.537107	0.478766	0.5504	0.491387	0.505357	0.627239	0.461599	0.433714	0.42097	0.596419	0.354162	0.509471	0.433218	0.617435	0.352009	0.485371	0.458469	0.460506	0.450228	0.499934	0.40153	0.447131	0.412393	0.543592	0.459522	0.474306	0.341024	0.719848	0.469503
	2.59633	0.379096	0.411834	1.39564	0.430199	0.40685	1.05863	0.43893	0.380463	0.491179	0.631667	0.791314	0.508653	0.399355	0.491717	0.47721	0.5892	0.478555	0.53273	0.51085	0.522275	0.492468	0.568197	0.504269	0.496751	0.610759	0.45548	0.444993	0.403623	0.585374	0.338084	0.480025	0.444696	0.590377	0.384148	0.51644	0.466817	0.44822	0.454062	0.510145	0.393645	0.438577	0.408074	0.541346	0.475207	0.4622	0.356577	0.687767	0.477411
	2.62967	0.373793	0.405882	1.35026	0.421855	0.400475	1.02472	0.419913	0.357553	0.471631	0.63309	0.76608	0.498847	0.379464	0.493107	0.443161	0.561538	0.467368	0.515063	0.473038	0.529839	0.472072	0.560437	0.483223	0.5003	0.599372	0.454857	0.41651	0.396131	0.57564	0.358837	0.434801	0.422061	0.567134	0.356793	0.470023	0.467111	0.449885	0.432471	0.491328	0.404242	0.435689	0.402106	0.491399	0.450613	0.458364	0.329701	0.665344	0.443667
	2.66302	0.363865	0.395881	1.33564	0.427906	0.401403	1.01345	0.427783	0.363682	0.465038	0.645374	0.745355	0.480752	0.389534	0.487877	0.431237	0.560564	0.457424	0.515003	0.493357	0.513851	0.480702	0.577443	0.499866	0.479901	0.598868	0.452247	0.416761	0.405288	0.58536	0.338902	0.483942	0.42738	0.556026	0.371596	0.463782	0.452468	0.42251	0.448982	0.495112	0.383341	0.460477	0.401899	0.538815	0.420799	0.448206	0.341543	0.657078	0.473331
	2.69637	0.36066	0.387672	1.31936	0.421083	0.38247	1.01689	0.41031	0.361605	0.480043	0.620215	0.737704	0.458056	0.381695	0.467971	0.459767	0.557632	0.462902	0.529969	0.46125	0.523384	0.445577	0.55124	0.483624	0.47491	0.607409	0.445944	0.430624	0.412798	0.5745	0.362323	0.490176	0.438363	0.591632	0.352435	0.47377	0.443814	0.430328	0.448087	0.477558	0.392858	0.426333	0.392931	0.498101	0.43405	0.43915	0.329626	0.658478	0.444984
	2.72967	0.365826	0.396269	1.34093	0.418045	0.386528	1.01429	0.418682	0.348451	0.470001	0.617478	0.731689	0.458371	0.400015	0.466318	0.437415	0.546869	0.458847	0.516625	0.464591	0.508741	0.469164	0.537127	0.501248	0.461218	0.568634	0.426125	0.407992	0.400369	0.573051	0.359594	0.453625	0.413076	0.562532	0.337737	0.475465	0.435305	0.412155	0.436811	0.464818	0.389857	0.420452	0.399118	0.506799	0.432864	0.449578	0.33746	0.673125	0.453277
	2.76303	0.360442	0.390767	1.28388	0.405506	0.39288	1.00744	0.403028	0.348475	0.463343	0.612407	0.711351	0.474772	0.373905	0.472817	0.425544	0.544091	0.426679	0.494314	0.4515	0.512782	0.459267	0.522369	0.461045	0.456858	0.567607	0.427474	0.42556	0.405942	0.550674	0.353082	0.445559	0.400121	0.552961	0.353727	0.463259	0.427909	0.416628	0.421894	0.459397	0.365777	0.435593	0.383688	0.491511	0.405415	0.446163	0.324424	0.634983	0.414953
	2.79637	0.358261	0.372952	1.3083	0.403254	0.374305	0.996629	0.39017	0.344165	0.466639	0.594055	0.69904	0.47902	0.388132	0.458113	0.429723	0.541418	0.454108	0.489455	0.451779	0.499896	0.4486	0.521179	0.483818	0.44899	0.550553	0.420046	0.394651	0.391268	0.541415	0.356029	0.449873	0.41152	0.557521	0.312675	0.46646	0.430711	0.419473	0.420207	0.460571	0.386761	0.432702	0.381796	0.490149	0.444312	0.434276	0.325495	0.601242	0.419431
	2.8297	0.345281	0.375672	1.26377	0.385892	0.410042	0.979222	0.385686	0.344862	0.450117	0.590215	0.675462	0.474652	0.389413	0.444149	0.439634	0.551691	0.428343	0.489607	0.438542	0.497348	0.447925	0.531224	0.45462	0.465676	0.53966	0.439351	0.394574	0.399139	0.546928	0.339502	0.444287	0.391971	0.528917	0.326364	0.458597	0.436564	0.434692	0.410826	0.466418	0.395863	0.415397	0.383776	0.467018	0.411296	0.429156	0.330708	0.611403	0.451241
	2.86297	0.351602	0.378572	1.22444	0.386609	0.381336	0.983584	0.393553	0.355838	0.438877	0.603668	0.660992	0.444298	0.38125	0.437734	0.43199	0.526647	0.428595	0.451363	0.458235	0.498105	0.447079	0.53422	0.455615	0.436423	0.526387	0.433608	0.405669	0.398284	0.526527	0.345278	0.435766	0.379432	0.540057	0.328139	0.443379	0.425172	0.39839	0.411575	0.448352	0.374917	0.426416	0.361373	0.481505	0.413659	0.424755	0.321881	0.597302	0.415619
	2.89637	0.348798	0.362938	1.21772	0.384643	0.379216	0.974161	0.390266	0.353121	0.440555	0.551045	0.652702	0.437111	0.391432	0.450141	0.428683	0.535379	0.436812	0.472742	0.426787	0.502611	0.426569	0.509914	0.487144	0.432576	0.518331	0.409892	0.384556	0.387279	0.505023	0.374725	0.423243	0.389587	0.523628	0.332636	0.434276	0.428958	0.384895	0.401108	0.460659	0.379532	0.415986	0.373771	0.465825	0.412561	0.425181	0.320361	0.592746	0.411372
	2.92963	0.342777	0.366567	1.19259	0.384428	0.362016	0.968611	0.360274	0.337113	0.437792	0.547945	0.639504	0.429427	0.381844	0.425285	0.428602	0.528382	0.415464	0.469339	0.416572	0.502648	0.39872	0.513334	0.455787	0.425888	0.515933	0.413282	0.394221	0.409737	0.505933	0.364506	0.418857	0.361338	0.529664	0.328594	0.444838	0.409947	0.392813	0.415395	0.437337	0.394448	0.409462	0.366153	0.43203	0.422523	0.436897	0.324364	0.548514	0.390765
	2.96302	0.347846	0.357609	1.20369	0.368053	0.357154	0.939366	0.366137	0.337992	0.427902	0.551487	0.639456	0.428415	0.373437	0.424551	0.419833	0.487487	0.411202	0.463979	0.413665	0.483943	0.42031	0.511077	0.459736	0.424863	0.497993	0.413478	0.392202	0.400014	0.514037	0.347854	0.422974	0.392427	0.502779	0.310804	0.404543	0.412583	0.389184	0.40038	0.444711	0.374805	0.409352	0.372728	0.462511	0.404117	0.42875	0.322864	0.56896	0.398417
	2.99633	0.354382	0.370589	1.18138	0.377525	0.36751	0.926486	0.379887	0.334006	0.437834	0.529437	0.6154	0.407071	0.36391	0.421648	0.415894	0.508291	0.399937	0.448581	0.405098	0.488813	0.406389	0.51109	0.473077	0.428951	0.486064	0.400581	0.384522	0.38482	0.491833	0.33252	0.387203	0.383103	0.503876	0.33157	0.419884	0.40508	0.382655	0.384052	0.433585	0.39708	0.404693	0.367054	0.444762	0.396463	0.419909	0.319764	0.55753	0.392097
	3.02968	0.335346	0.360546	1.1331	0.377413	0.375513	0.915824	0.369262	0.336732	0.4304	0.520241	0.62265	0.427968	0.367257	0.434799	0.43226	0.512924	0.41347	0.434793	0.427435	0.486701	0.38889	0.488909	0.456723	0.423293	0.507349	0.399271	0.372485	0.384294	0.494286	0.337675	0.404694	0.362089	0.486113	0.344804	0.400855	0.414065	0.375127	0.390148	0.430503	0.374878	0.371982	0.3634	0.433981	0.394452	0.426344	0.314839	0.517155	0.38985
	3.06302	0.332717	0.348794	1.12657	0.376283	0.363623	0.885119	0.356946	0.331299	0.436657	0.529353	0.617136	0.412634	0.365141	0.408838	0.407211	0.467368	0.408065	0.425923	0.401941	0.481821	0.390899	0.490565	0.422536	0.40529	0.491372	0.40388	0.38246	0.38582	0.480459	0.337566	0.403853	0.365456	0.520856	0.323029	0.408018	0.414703	0.38152	0.377696	0.419058	0.368507	0.400886	0.372029	0.427959	0.400082	0.426393	0.320243	0.550809	0.395958
	3.09635	0.335848	0.34658	1.13	0.37417	0.362368	0.892936	0.37401	0.334356	0.42941	0.509489	0.613118	0.41042	0.350588	0.406433	0.419133	0.473261	0.400794	0.429056	0.38513	0.495	0.394196	0.477324	0.449241	0.412595	0.46276	0.395532	0.367313	0.370807	0.487302	0.353778	0.433096	0.357351	0.486198	0.319316	0.428468	0.407783	0.366116	0.366199	0.408634	0.371116	0.387514	0.36136	0.429747	0.40704	0.420307	0.310469	0.501837	0.371119
	3.12967	0.342178	0.346391	1.10821	0.381123	0.363071	0.854369	0.353481	0.324732	0.42789	0.518016	0.583524	0.418312	0.352401	0.411447	0.407322	0.473369	0.40448	0.416504	0.387539	0.454043	0.379161	0.482264	0.427422	0.391833	0.470762	0.39394	0.379004	0.384477	0.486082	0.330065	0.383707	0.343405	0.478681	0.341216	0.390461	0.390424	0.354381	0.368936	0.420526	0.390066	0.402607	0.350562	0.416568	0.411414	0.434642	0.316764	0.539665	0.394978
	3.16302	0.330318	0.343249	1.09073	0.377809	0.359418	0.85088	0.350438	0.338174	0.40106	0.507345	0.578064	0.394819	0.360669	0.407176	0.41651	0.474122	0.393829	0.428347	0.402112	0.459063	0.397301	0.464025	0.460141	0.396052	0.454466	0.387007	0.358789	0.385983	0.474552	0.328648	0.415622	0.360428	0.479278	0.322774	0.406459	0.382853	0.37689	0.389424	0.428086	0.366713	0.378947	0.350957	0.431173	0.379585	0.427517	0.312072	0.492353	0.378818
	3.19637	0.328664	0.339568	1.09067	0.370865	0.354812	0.847066	0.346533	0.328971	0.413388	0.518472	0.576738	0.405274	0.358758	0.441961	0.424298	0.484089	0.381513	0.428804	0.404341	0.455115	0.390446	0.463467	0.440578	0.389764	0.438368	0.383503	0.368544	0.381107	0.475756	0.336774	0.400172	0.356886	0.47173	0.306018	0.372685	0.385502	0.366934	0.365056	0.405569	0.357505	0.407562	0.356585	0.421863	0.405007	0.420121	0.31267	0.494249	0.377126
	3.22968	0.333638	0.343047	1.03105	0.357326	0.342062	0.822691	0.345648	0.33693	0.420482	0.502817	0.56678	0.394505	0.355911	0.407875	0.415129	0.461197	0.384485	0.399449	0.399807	0.444243	0.364192	0.47253	0.436682	0.425724	0.440949	0.3624	0.369214	0.375083	0.456469	0.350223	0.36868	0.351126	0.461505	0.303603	0.35716	0.384525	0.371352	0.361608	0.411768	0.362517	0.406192	0.36236	0.420691	0.379062	0.409217	0.317909	0.510438	0.363028
	3.26297	0.331667	0.341646	1.02202	0.359422	0.354406	0.813127	0.34084	0.3186	0.399899	0.49516	0.55889	0.391136	0.341644	0.41016	0.411207	0.44501	0.387676	0.416908	0.390188	0.464834	0.370188	0.458358	0.421768	0.406836	0.430513	0.373858	0.366919	0.368232	0.459403	0.332709	0.372531	0.346356	0.462423	0.319143	0.36882	0.392068	0.371922	0.365874	0.403365	0.368863	0.379476	0.35349	0.402757	0.371139	0.385686	0.315404	0.468615	0.377106
	3.29635	0.313299	0.34585	1.04118	0.35913	0.341475	0.789416	0.339957	0.333607	0.403689	0.478006	0.550359	0.376594	0.345792	0.37625	0.395995	0.444632	0.396979	0.388715	0.376594	0.480158	0.361373	0.461859	0.42191	0.406838	0.43081	0.373062	0.356455	0.365681	0.460454	0.347079	0.377488	0.334804	0.456834	0.328617	0.350777	0.384946	0.360416	0.363537	0.415746	0.368907	0.382065	0.347766	0.394093	0.370953	0.397069	0.318922	0.46576	0.355747
	3.32968	0.330212	0.335099	1.02119	0.349256	0.341514	0.773532	0.322472	0.322475	0.405116	0.476031	0.544733	0.392908	0.331732	0.409102	0.397021	0.458079	0.367403	0.384475	0.383915	0.458015	0.36352	0.446109	0.432265	0.389131	0.43081	0.357768	0.35526	0.360969	0.476665	0.349739	0.360996	0.355769	0.454318	0.309448	0.35235	0.382444	0.364339	0.355319	0.397448	0.364629	0.362307	0.350102	0.399012	0.365393	0.397132	0.310555	0.468601	0.369269
	3.36302	0.332884	0.334085	0.994329	0.362878	0.345973	0.772727	0.334158	0.311579	0.407411	0.454871	0.532026	0.371151	0.345674	0.389632	0.403953	0.427578	0.381431	0.387648	0.37249	0.453718	0.366198	0.465894	0.425798	0.366699	0.415577	0.367754	0.351444	0.37029	0.4438	0.350639	0.360558	0.350286	0.442866	0.325066	0.392418	0.378473	0.341377	0.344936	0.396606	0.366271	0.368853	0.347153	0.395968	0.38406	0.385996	0.312959	0.454031	0.377035
	3.39635	0.331306	0.334809	1.01018	0.345159	0.33937	0.767036	0.335282	0.334632	0.393213	0.464388	0.53492	0.385916	0.342953	0.405664	0.411498	0.456317	0.372938	0.396057	0.377981	0.453493	0.359265	0.43391	0.406249	0.38005	0.407718	0.372298	0.35897	0.354225	0.448455	0.343825	0.371017	0.331912	0.427766	0.308194	0.344821	0.367814	0.361109	0.347466	0.390834	0.345597	0.366651	0.344881	0.38017	0.380226	0.364763	0.312066	0.483372	0.364558
	3.4297	0.318657	0.339108	0.953291	0.34939	0.34202	0.739191	0.319776	0.329402	0.391602	0.458788	0.525172	0.385392	0.343107	0.389251	0.421919	0.444968	0.363888	0.385591	0.378738	0.456359	0.368747	0.446674	0.392525	0.378009	0.40905	0.362253	0.365505	0.362161	0.436556	0.354489	0.364844	0.339544	0.422587	0.325971	0.390312	0.379515	0.346246	0.35475	0.403705	0.368535	0.37272	0.35139	0.385863	0.365447	0.409724	0.317478	0.479404	0.369945
	3.463	0.321321	0.335253	0.973614	0.350081	0.340349	0.730524	0.316715	0.315515	0.396008	0.463213	0.50702	0.365003	0.347204	0.396651	0.398369	0.441478	0.369409	0.378573	0.366874	0.461316	0.367996	0.441937	0.40709	0.380774	0.401494	0.347326	0.362561	0.354442	0.446368	0.329117	0.37831	0.340543	0.432921	0.313594	0.353879	0.373413	0.368589	0.354765	0.396096	0.369004	0.361905	0.341842	0.377498	0.348632	0.367937	0.315884	0.448275	0.354892
	3.49633	0.316038	0.331411	0.942988	0.337526	0.342014	0.726592	0.323897	0.325344	0.383262	0.438999	0.50709	0.381337	0.334797	0.385083	0.389605	0.419415	0.367951	0.377698	0.372755	0.453747	0.36553	0.408855	0.426533	0.37378	0.403199	0.359172	0.375327	0.335804	0.42466	0.329059	0.367659	0.326633	0.427858	0.312368	0.381732	0.377194	0.345869	0.339554	0.404044	0.369475	0.350585	0.341673	0.380726	0.364493	0.382549	0.312985	0.448802	0.349493
	3.52968	0.304344	0.327143	0.953243	0.345636	0.335956	0.686723	0.316229	0.306275	0.370179	0.422876	0.50216	0.392445	0.335817	0.383484	0.395822	0.435942	0.355522	0.364976	0.356933	0.465522	0.363786	0.432984	0.399641	0.385045	0.403719	0.364667	0.361609	0.3588	0.420581	0.348758	0.357364	0.322344	0.421095	0.307311	0.338548	0.374942	0.347057	0.33464	0.407939	0.357586	0.373426	0.335301	0.380458	0.36323	0.390133	0.311158	0.428788	0.360046
	3.56302	0.317968	0.330882	0.92894	0.339878	0.31368	0.702058	0.32898	0.318462	0.387844	0.423639	0.499114	0.374429	0.346137	0.389126	0.411853	0.408848	0.357241	0.36125	0.367216	0.4439	0.344431	0.441368	0.418746	0.364726	0.379406	0.353366	0.3591	0.361489	0.424697	0.338079	0.377392	0.323461	0.415624	0.314634	0.343931	0.365497	0.346767	0.337094	0.390524	0.358748	0.371204	0.328215	0.372848	0.365651	0.367322	0.306837	0.427267	0.359235
	3.5963	0.315762	0.329037	0.912872	0.349277	0.342999	0.670445	0.315055	0.317341	0.375177	0.426055	0.484554	0.379119	0.333368	0.37928	0.403165	0.41547	0.347958	0.372135	0.342729	0.45154	0.363667	0.428555	0.399371	0.354687	0.379599	0.353029	0.365422	0.341573	0.413718	0.344887	0.351827	0.320906	0.404218	0.317287	0.336784	0.372763	0.328374	0.345351	0.388239	0.363813	0.364734	0.338715	0.370732	0.355492	0.40187	0.300918	0.441689	0.350852
	3.62963	0.315052	0.327784	0.905818	0.343038	0.323684	0.656356	0.31723	0.313583	0.372824	0.430003	0.479206	0.368583	0.308291	0.383403	0.400048	0.413468	0.346417	0.363209	0.361228	0.448258	0.353772	0.422925	0.417231	0.362193	0.387734	0.35034	0.35906	0.368827	0.422525	0.339152	0.347646	0.324812	0.398557	0.314148	0.356447	0.367445	0.338917	0.354189	0.380619	0.369088	0.352933	0.331774	0.377798	0.370144	0.364754	0.310701	0.422283	0.342325
	3.66302	0.320349	0.327758	0.899077	0.332014	0.332406	0.662094	0.323717	0.314406	0.380569	0.414047	0.483327	0.369554	0.340726	0.385518	0.401982	0.397641	0.35387	0.366158	0.362891	0.446253	0.367527	0.435576	0.431626	0.357646	0.378618	0.366827	0.352577	0.346945	0.423123	0.356217	0.357207	0.327889	0.40006	0.3195	0.352038	0.356054	0.345449	0.337675	0.394137	0.367952	0.36586	0.332445	0.359417	0.374875	0.387493	0.316511	0.429581	0.344375
	3.69635	0.308353	0.325212	0.905192	0.34611	0.322279	0.634528	0.312026	0.323292	0.364182	0.421085	0.481433	0.373873	0.334203	0.370385	0.390382	0.406456	0.344585	0.359991	0.338191	0.430433	0.349382	0.41798	0.405965	0.367128	0.387947	0.348253	0.33922	0.349259	0.399078	0.343076	0.326479	0.322241	0.393632	0.311682	0.322186	0.355534	0.349292	0.318154	0.37898	0.360731	0.357563	0.325922	0.367277	0.3557	0.38967	0.30125	0.429708	0.346952
	3.7297	0.317019	0.323179	0.867011	0.343447	0.346989	0.641696	0.316512	0.307269	0.373168	0.428563	0.477051	0.364089	0.336195	0.378236	0.385124	0.390537	0.361156	0.357186	0.352176	0.450782	0.354374	0.404012	0.368324	0.34497	0.377447	0.359666	0.346214	0.353125	0.407424	0.342381	0.345712	0.320467	0.383503	0.317416	0.347282	0.34995	0.3376	0.324812	0.38129	0.374527	0.374117	0.322469	0.371725	0.352512	0.381892	0.31368	0.420125	0.342789
	3.76302	0.318324	0.321999	0.870556	0.342933	0.322541	0.612161	0.324592	0.305275	0.357988	0.425704	0.473944	0.345613	0.335958	0.378576	0.388006	0.396716	0.349669	0.35486	0.357111	0.450003	0.342661	0.421886	0.416118	0.359644	0.367128	0.355741	0.35401	0.368118	0.410707	0.339995	0.305597	0.321907	0.408136	0.302107	0.347735	0.364527	0.356431	0.328074	0.390069	0.357641	0.352688	0.329351	0.365756	0.344508	0.380603	0.30864	0.427794	0.348636
	3.79633	0.322227	0.321859	0.85494	0.339391	0.325667	0.618697	0.312345	0.310277	0.363105	0.420494	0.460472	0.341388	0.318714	0.379018	0.405627	0.39549	0.322606	0.355172	0.353565	0.434933	0.343241	0.399054	0.409748	0.346382	0.367117	0.352532	0.354054	0.335762	0.39697	0.339844	0.344776	0.3222	0.386849	0.321081	0.321526	0.360454	0.349489	0.345437	0.384337	0.360206	0.35237	0.333394	0.352645	0.35671	0.378832	0.30889	0.398079	0.328628
	3.82963	0.30652	0.32218	0.828847	0.340612	0.31616	0.60093	0.317262	0.310123	0.368039	0.396079	0.460087	0.350195	0.323744	0.356022	0.394597	0.372069	0.333051	0.367851	0.339968	0.424163	0.345422	0.40315	0.397503	0.352892	0.375642	0.356296	0.337646	0.35614	0.404073	0.32431	0.336414	0.337006	0.389977	0.309922	0.336975	0.363008	0.323835	0.339211	0.385575	0.34953	0.342824	0.332738	0.361041	0.353004	0.380397	0.308254	0.408365	0.342517
	3.86303	0.311065	0.301994	0.82491	0.330065	0.320802	0.588645	0.291253	0.329135	0.365894	0.383923	0.455401	0.346077	0.315524	0.372178	0.385688	0.367435	0.326008	0.342125	0.346713	0.407591	0.333877	0.401065	0.401956	0.366245	0.370747	0.338944	0.349521	0.342348	0.400156	0.330363	0.32107	0.315812	0.378191	0.299103	0.329813	0.348423	0.330469	0.323467	0.371027	0.35846	0.356759	0.337659	0.344678	0.359023	0.372298	0.304857	0.413287	0.322283
	3.8964	0.318571	0.319512	0.827888	0.336708	0.328039	0.587426	0.308602	0.303422	0.354553	0.423309	0.447885	0.34165	0.320057	0.372694	0.391058	0.377782	0.343755	0.353843	0.348198	0.439536	0.319877	0.414219	0.386671	0.346001	0.351817	0.337006	0.3494	0.357254	0.39976	0.349125	0.325164	0.31313	0.377756	0.312266	0.339131	0.354609	0.348585	0.314902	0.380493	0.35967	0.362071	0.333988	0.35933	0.345883	0.361183	0.313481	0.396329	0.341093
	3.9297	0.301223	0.320915	0.801728	0.331624	0.307777	0.588949	0.304686	0.325271	0.357172	0.396297	0.45822	0.338356	0.320644	0.384745	0.405986	0.385253	0.333842	0.337779	0.342356	0.419557	0.333913	0.399246	0.380631	0.348416	0.35616	0.343126	0.34325	0.339337	0.38545	0.323811	0.346918	0.31178	0.374842	0.300357	0.334782	0.361169	0.334637	0.328949	0.372566	0.372809	0.32654	0.321506	0.34092	0.344299	0.363921	0.30615	0.408603	0.329714
	3.96302	0.314098	0.32049	0.788587	0.330385	0.332158	0.564243	0.312903	0.30386	0.34161	0.398216	0.443656	0.327428	0.329671	0.381491	0.389359	0.377048	0.324258	0.343754	0.349315	0.413472	0.329155	0.403842	0.371331	0.343152	0.359786	0.336761	0.332728	0.350382	0.395311	0.324956	0.337874	0.312627	0.371774	0.307673	0.327396	0.348128	0.318566	0.323768	0.3828	0.344285	0.357789	0.335161	0.34923	0.347613	0.374705	0.317735	0.398811	0.328319
	3.99638	0.316115	0.322714	0.800865	0.338873	0.331137	0.572423	0.300543	0.317683	0.342862	0.407958	0.434299	0.346611	0.313439	0.36031	0.388941	0.401696	0.325027	0.344374	0.339034	0.420336	0.332055	0.409218	0.363721	0.345871	0.353917	0.345633	0.36594	0.337671	0.38463	0.322425	0.328902	0.303174	0.380247	0.297289	0.313701	0.352053	0.337162	0.31927	0.384892	0.352819	0.340246	0.313716	0.36096	0.33339	0.358841	0.314273	0.400336	0.358105
	4.02968	0.312986	0.316168	0.787068	0.329775	0.321835	0.557879	0.317336	0.338146	0.35162	0.412645	0.435626	0.352079	0.330201	0.356356	0.383668	0.385012	0.331319	0.347063	0.347811	0.428064	0.33183	0.403972	0.415247	0.340664	0.361008	0.33159	0.343119	0.352976	0.382661	0.348438	0.339164	0.322408	0.375136	0.320456	0.313773	0.354947	0.328669	0.340751	0.376795	0.346826	0.349555	0.32984	0.34904	0.343263	0.368559	0.322482	0.397293	0.324248
	4.063	0.325262	0.320132	0.780386	0.342077	0.31514	0.55575	0.304893	0.299295	0.348271	0.380952	0.443177	0.337785	0.31864	0.379799	0.401629	0.376592	0.331709	0.352672	0.343979	0.406296	0.336226	0.411582	0.361775	0.354793	0.343634	0.337889	0.343865	0.341359	0.383085	0.324015	0.331171	0.32767	0.361301	0.317822	0.315304	0.34694	0.327432	0.318245	0.395103	0.369878	0.33695	0.327004	0.35794	0.348349	0.386408	0.303914	0.383152	0.349085
	4.09633	0.305536	0.30761	0.770359	0.337775	0.324936	0.558841	0.309439	0.30296	0.363032	0.406272	0.418645	0.340976	0.310892	0.366517	0.403894	0.383668	0.319733	0.342722	0.324673	0.442967	0.317395	0.409323	0.376139	0.334682	0.361142	0.33279	0.354137	0.356903	0.380023	0.335838	0.327202	0.305248	0.376274	0.312589	0.332142	0.3503	0.336419	0.327651	0.379507	0.375316	0.327305	0.322205	0.353191	0.342038	0.364714	0.293822	0.370222	0.339345
	4.12963	0.309805	0.308627	0.772444	0.33049	0.328408	0.534561	0.307234	0.304387	0.344983	0.386068	0.424138	0.327663	0.319669	0.354923	0.399807	0.391333	0.333929	0.343693	0.333049	0.406094	0.339211	0.414489	0.378941	0.34326	0.348853	0.340761	0.343597	0.348574	0.409463	0.364763	0.33561	0.305559	0.3601	0.299806	0.338051	0.370427	0.323498	0.334313	0.388024	0.344467	0.35317	0.319186	0.352326	0.338484	0.358853	0.301941	0.375858	0.318637
	4.163	0.307829	0.317895	0.780082	0.334328	0.3234	0.526298	0.315072	0.316435	0.34665	0.395796	0.415742	0.345693	0.317816	0.371191	0.396424	0.379868	0.317732	0.332638	0.316696	0.422287	0.32009	0.391676	0.373778	0.352294	0.361364	0.339345	0.352543	0.334233	0.385918	0.338428	0.311687	0.322097	0.384077	0.312447	0.345965	0.351521	0.340258	0.319391	0.374486	0.341769	0.345671	0.321534	0.34526	0.348115	0.360544	0.304285	0.364368	0.334103
	4.19637	0.304021	0.316028	0.745102	0.331801	0.326569	0.525909	0.28533	0.304406	0.352296	0.372139	0.43342	0.316352	0.320678	0.36633	0.387687	0.38806	0.309767	0.329673	0.319215	0.406173	0.325525	0.396269	0.383537	0.362627	0.341822	0.337084	0.348583	0.336168	0.37165	0.3209	0.337826	0.319926	0.363841	0.316815	0.319721	0.353577	0.335	0.31815	0.37681	0.348564	0.345506	0.324058	0.345527	0.338483	0.365084	0.307605	0.375661	0.329821
	4.22962	0.315298	0.311156	0.727741	0.325977	0.314558	0.515031	0.31264	0.2995	0.338681	0.378472	0.432329	0.329318	0.318259	0.349083	0.38848	0.376625	0.327799	0.324054	0.337906	0.41167	0.325163	0.391716	0.364181	0.327081	0.346981	0.333612	0.337702	0.342784	0.375936	0.333499	0.334651	0.313678	0.366745	0.30835	0.313584	0.35694	0.335558	0.318344	0.370267	0.347962	0.340052	0.320916	0.339108	0.341322	0.373361	0.299844	0.397755	0.334431
	4.26307	0.316908	0.313352	0.735588	0.31612	0.315576	0.508756	0.309721	0.32197	0.33005	0.38806	0.414035	0.333801	0.32504	0.369682	0.385473	0.362897	0.316512	0.342149	0.322904	0.409132	0.297084	0.396558	0.342327	0.330309	0.343001	0.319797	0.347283	0.326878	0.36703	0.330805	0.334028	0.31638	0.360215	0.330509	0.320461	0.344136	0.331843	0.314379	0.379756	0.356757	0.338917	0.319895	0.333927	0.344562	0.352311	0.308841	0.389136	0.346896
	4.29628	0.310845	0.314682	0.730268	0.326934	0.333636	0.510955	0.316404	0.31445	0.333386	0.379401	0.391723	0.3317	0.318488	0.332539	0.380591	0.356518	0.303168	0.336484	0.321683	0.417131	0.320884	0.387415	0.340134	0.350184	0.350839	0.331408	0.338567	0.326337	0.368718	0.325689	0.32203	0.320145	0.368448	0.310959	0.317804	0.354287	0.32305	0.32443	0.373906	0.361353	0.343063	0.329694	0.327901	0.330774	0.354627	0.297236	0.383856	0.327011
	4.3297	0.316375	0.323741	0.730462	0.334409	0.323928	0.498066	0.307586	0.306495	0.341155	0.376952	0.410297	0.333549	0.33013	0.366548	0.39761	0.360623	0.311325	0.342387	0.318132	0.407868	0.331556	0.385184	0.358212	0.325395	0.345217	0.34431	0.351723	0.351758	0.375883	0.330553	0.296853	0.315791	0.371302	0.302805	0.312245	0.345296	0.333394	0.324409	0.375018	0.357348	0.348901	0.322428	0.332327	0.343697	0.366882	0.308185	0.365463	0.324009
	4.36298	0.306987	0.303855	0.719096	0.335248	0.312003	0.501403	0.309534	0.318168	0.345342	0.383851	0.409826	0.320467	0.306722	0.344753	0.398321	0.372175	0.321258	0.329614	0.345499	0.40836	0.312605	0.389402	0.349305	0.341846	0.334383	0.335453	0.349533	0.341488	0.363111	0.336736	0.313015	0.315282	0.334921	0.310124	0.343187	0.346341	0.307458	0.323341	0.373653	0.367113	0.334784	0.311976	0.332144	0.337612	0.352081	0.30297	0.373942	0.351687
	4.39628	0.313371	0.325114	0.711084	0.325305	0.317061	0.491674	0.301363	0.299393	0.335165	0.368544	0.409646	0.322582	0.314806	0.347678	0.381582	0.371062	0.320044	0.323957	0.326967	0.410165	0.322812	0.400948	0.372806	0.337599	0.346658	0.344085	0.333028	0.352634	0.373245	0.336063	0.320713	0.315955	0.356446	0.31085	0.318686	0.350204	0.316164	0.297551	0.384925	0.357	0.338548	0.326793	0.329928	0.352663	0.360019	0.31895	0.36634	0.300102
	4.42962	0.310245	0.317256	0.683074	0.331576	0.337177	0.486639	0.308017	0.305131	0.342099	0.380536	0.406	0.315776	0.306928	0.360008	0.38495	0.360473	0.326196	0.347092	0.33712	0.406284	0.310165	0.392259	0.37106	0.335707	0.342259	0.331535	0.351474	0.353587	0.365505	0.342242	0.329882	0.311945	0.347023	0.31313	0.322362	0.358109	0.324841	0.30993	0.380787	0.36167	0.32652	0.331227	0.334373	0.337934	0.347895	0.31176	0.370942	0.320019
	4.463	0.313841	0.317286	0.700562	0.333582	0.315566	0.496597	0.300834	0.302387	0.343528	0.385396	0.399441	0.31823	0.301958	0.361604	0.378225	0.358992	0.317631	0.317065	0.31932	0.418296	0.330614	0.379787	0.349334	0.347403	0.325448	0.329311	0.348896	0.347539	0.372236	0.331414	0.319439	0.309111	0.358876	0.298721	0.308316	0.342723	0.340557	0.321049	0.376074	0.357139	0.340726	0.315682	0.339039	0.350473	0.356849	0.315208	0.360583	0.321933
	4.49635	0.310612	0.309589	0.688655	0.335494	0.312562	0.472139	0.290713	0.306343	0.343554	0.347204	0.390408	0.324361	0.306946	0.345514	0.372154	0.361832	0.328066	0.31875	0.338479	0.393752	0.319621	0.384003	0.352095	0.350124	0.332044	0.330843	0.345927	0.349817	0.362209	0.310759	0.345039	0.309808	0.349131	0.306692	0.312304	0.349245	0.329892	0.315612	0.37018	0.352098	0.335891	0.320775	0.340631	0.329364	0.348952	0.293152	0.354406	0.329818
	4.52965	0.297541	0.313163	0.663833	0.330574	0.325078	0.476064	0.30282	0.306094	0.345193	0.356787	0.39525	0.316888	0.323567	0.37117	0.395315	0.347622	0.31319	0.329678	0.33528	0.391807	0.320913	0.370174	0.37658	0.31852	0.338859	0.324657	0.346225	0.340606	0.367716	0.318655	0.327348	0.314014	0.340329	0.299834	0.343995	0.348455	0.339598	0.311815	0.372038	0.341437	0.328643	0.324742	0.341553	0.335628	0.340538	0.310042	0.358005	0.324313
	4.56303	0.306619	0.329025	0.660387	0.328884	0.340615	0.465625	0.303974	0.323192	0.333592	0.375812	0.392059	0.32131	0.317254	0.366996	0.382897	0.361519	0.322042	0.307878	0.312114	0.393303	0.325003	0.382903	0.361547	0.332746	0.33738	0.324518	0.335518	0.347752	0.377535	0.339519	0.305721	0.317978	0.329356	0.311952	0.322058	0.345429	0.330759	0.331272	0.376491	0.363331	0.360401	0.328964	0.337762	0.357863	0.337488	0.305315	0.35951	0.316158
	4.59633	0.303876	0.316345	0.662937	0.335603	0.314598	0.454251	0.291224	0.330975	0.338665	0.367977	0.385095	0.327461	0.307986	0.3611	0.380252	0.3596	0.333869	0.315196	0.344832	0.412244	0.321605	0.369527	0.374854	0.351589	0.34094	0.332539	0.33345	0.343779	0.368297	0.323723	0.311554	0.31495	0.334686	0.320448	0.328755	0.335207	0.331531	0.324511	0.375119	0.357068	0.342116	0.335868	0.331605	0.36	0.355139	0.308273	0.355876	0.336377
	4.62968	0.317791	0.326255	0.662832	0.326692	0.325334	0.459961	0.301586	0.306826	0.333897	0.362329	0.388307	0.319696	0.307349	0.357231	0.383814	0.353969	0.345292	0.326574	0.324851	0.397268	0.329162	0.362256	0.343089	0.334034	0.329141	0.331254	0.345815	0.341298	0.366757	0.345819	0.324788	0.310213	0.349409	0.306438	0.318394	0.337134	0.34283	0.309259	0.374554	0.336174	0.342577	0.325212	0.329638	0.343562	0.360511	0.298418	0.349604	0.322806
	4.66302	0.314959	0.312114	0.649724	0.324099	0.305779	0.448073	0.311069	0.309419	0.315981	0.353308	0.382133	0.314641	0.321998	0.353209	0.39639	0.351469	0.310615	0.315535	0.311081	0.390912	0.342516	0.367097	0.344622	0.334166	0.321102	0.326894	0.344909	0.345714	0.349746	0.34064	0.323772	0.313235	0.333486	0.311898	0.314598	0.347423	0.333399	0.321658	0.362804	0.358166	0.323016	0.313484	0.334389	0.335257	0.346299	0.306449	0.340441	0.327093
	4.69637	0.313686	0.314582	0.646307	0.335181	0.317676	0.43641	0.289465	0.295502	0.332695	0.358738	0.380376	0.315828	0.326767	0.377006	0.380137	0.348465	0.328827	0.325101	0.321419	0.399184	0.314598	0.369305	0.339894	0.345956	0.330636	0.320748	0.337586	0.330981	0.355418	0.325215	0.31089	0.318555	0.33635	0.305559	0.325097	0.339986	0.310676	0.315693	0.37908	0.357397	0.34506	0.326817	0.331136	0.342315	0.346285	0.310106	0.347479	0.3295
	4.72972	0.307712	0.312756	0.627283	0.325972	0.304336	0.4476	0.313862	0.321225	0.33409	0.362546	0.380345	0.331438	0.3184	0.337797	0.3723	0.364376	0.332012	0.305561	0.330575	0.390876	0.318077	0.390183	0.361337	0.312303	0.33936	0.34484	0.343881	0.346214	0.349061	0.325564	0.315758	0.31159	0.328599	0.308822	0.307694	0.355366	0.314467	0.322131	0.373679	0.360756	0.31996	0.309283	0.34627	0.335153	0.355104	0.306448	0.347296	0.31873
	4.76297	0.309932	0.316788	0.631405	0.32646	0.310085	0.439211	0.302365	0.298404	0.343894	0.342841	0.380483	0.329191	0.307123	0.364917	0.375888	0.370826	0.310262	0.320705	0.316307	0.400939	0.315011	0.3878	0.352524	0.337391	0.328008	0.325926	0.341158	0.339611	0.362366	0.340845	0.343967	0.317196	0.344676	0.299414	0.310811	0.34466	0.323115	0.323948	0.367067	0.347828	0.341303	0.326561	0.337615	0.339136	0.351403	0.303223	0.360451	0.305666
	4.79632	0.310364	0.311919	0.629826	0.336381	0.31824	0.429851	0.292865	0.307087	0.333226	0.36235	0.379383	0.332564	0.30978	0.342529	0.355813	0.358349	0.331845	0.316819	0.325249	0.401522	0.321516	0.360639	0.354905	0.341499	0.328648	0.328277	0.358579	0.333171	0.353754	0.340936	0.336754	0.298031	0.328668	0.315365	0.301149	0.349414	0.317977	0.307954	0.368925	0.347167	0.323209	0.317326	0.33533	0.339613	0.34901	0.304491	0.343989	0.317516
	4.82968	0.308081	0.318039	0.623163	0.331465	0.312247	0.43095	0.293274	0.321332	0.332647	0.371764	0.376028	0.328491	0.305542	0.34737	0.389918	0.332624	0.322463	0.321806	0.327604	0.382984	0.314147	0.377221	0.351283	0.328272	0.334358	0.329915	0.347953	0.338292	0.344903	0.337949	0.30975	0.299114	0.324941	0.315652	0.316166	0.335065	0.325173	0.320959	0.376737	0.355806	0.330237	0.311024	0.336309	0.325707	0.327262	0.300519	0.341361	0.305689
	4.863	0.321203	0.319678	0.626055	0.339933	0.321472	0.426433	0.29218	0.319888	0.332448	0.346023	0.367853	0.311425	0.308595	0.356683	0.382637	0.355042	0.325909	0.313534	0.333644	0.379287	0.319751	0.372897	0.351972	0.334956	0.332688	0.340943	0.347774	0.331958	0.362151	0.318024	0.29914	0.308828	0.333913	0.303886	0.308702	0.351987	0.314264	0.326927	0.37756	0.36403	0.352075	0.321102	0.34764	0.344252	0.365426	0.309659	0.360072	0.305307
	4.89635	0.318525	0.315099	0.605622	0.327342	0.298022	0.425801	0.293944	0.31636	0.341181	0.37446	0.372006	0.321505	0.316706	0.353379	0.384753	0.337831	0.323058	0.310517	0.327156	0.384563	0.303259	0.367633	0.348655	0.330379	0.335322	0.318884	0.335694	0.337897	0.337981	0.321415	0.308508	0.312935	0.327905	0.300228	0.312117	0.332712	0.314314	0.301499	0.371343	0.334842	0.33094	0.31706	0.330583	0.327934	0.351518	0.312678	0.345205	0.317061
	4.9297	0.298283	0.311839	0.607161	0.318837	0.31578	0.421303	0.308265	0.300909	0.328573	0.359366	0.37405	0.326736	0.312212	0.357224	0.390949	0.350496	0.315644	0.327953	0.3258	0.37288	0.311878	0.368539	0.346806	0.333065	0.338804	0.33685	0.35398	0.33175	0.3614	0.337884	0.312918	0.306579	0.320268	0.314455	0.300454	0.352861	0.340304	0.312366	0.369503	0.35628	0.355537	0.319664	0.341022	0.347904	0.353438	0.311908	0.344479	0.336669
	4.96303	0.322	0.315505	0.590934	0.33775	0.315934	0.413625	0.286849	0.314733	0.337881	0.354292	0.374316	0.325903	0.305892	0.354566	0.396026	0.353486	0.31606	0.301906	0.320672	0.377015	0.330119	0.374856	0.337703	0.337309	0.328787	0.312308	0.338173	0.347132	0.34747	0.335368	0.327925	0.325931	0.347335	0.293898	0.308873	0.336511	0.340453	0.31462	0.372488	0.355169	0.343051	0.319711	0.322121	0.335281	0.336491	0.295515	0.351923	0.309141
	4.99633	0.319617	0.312494	0.597937	0.321931	0.329021	0.412486	0.295943	0.309217	0.334752	0.357846	0.371841	0.322373	0.319273	0.355234	0.374206	0.320728	0.31556	0.308279	0.327329	0.391019	0.330514	0.380876	0.351885	0.330786	0.320608	0.325167	0.326939	0.342316	0.356367	0.342959	0.31564	0.321778	0.330722	0.308913	0.310566	0.342016	0.311635	0.312584	0.373827	0.342586	0.342583	0.318332	0.330061	0.346544	0.366821	0.309779	0.356998	0.337915
	5.02968	0.313807	0.311956	0.586052	0.327573	0.319182	0.415313	0.297471	0.316907	0.320088	0.357652	0.368993	0.315959	0.310323	0.346442	0.37298	0.346742	0.314263	0.313201	0.319338	0.386006	0.312448	0.364618	0.334511	0.321087	0.329155	0.335405	0.342704	0.336798	0.349604	0.364337	0.318337	0.304421	0.326936	0.31436	0.312504	0.345761	0.340896	0.319237	0.366284	0.344714	0.3191	0.315819	0.324273	0.339729	0.352211	0.301424	0.340091	0.318469
	5.06305	0.306788	0.302663	0.585761	0.337601	0.317851	0.413924	0.30342	0.336352	0.335647	0.361938	0.354975	0.317911	0.30075	0.350928	0.382261	0.357898	0.29546	0.319835	0.348058	0.38851	0.308174	0.355708	0.366564	0.332405	0.329719	0.32886	0.332858	0.331115	0.343569	0.334337	0.307323	0.316651	0.31056	0.295505	0.297565	0.347421	0.313375	0.305561	0.377874	0.353736	0.334209	0.325997	0.328895	0.335682	0.363771	0.300088	0.342502	0.295501
	5.09633	0.321732	0.306658	0.565826	0.330963	0.311409	0.401713	0.304116	0.320697	0.323384	0.343747	0.363003	0.316898	0.315376	0.340502	0.389546	0.342825	0.316585	0.321447	0.323168	0.382011	0.327834	0.383484	0.362712	0.317339	0.333068	0.315317	0.338222	0.334117	0.355399	0.339651	0.317482	0.301161	0.331543	0.301723	0.331382	0.331914	0.325185	0.312048	0.37668	0.352832	0.345183	0.332637	0.32459	0.344622	0.352082	0.301887	0.351429	0.325726
	5.12968	0.309447	0.315987	0.570138	0.333149	0.310312	0.388502	0.30316	0.310467	0.334634	0.337612	0.355188	0.305992	0.313399	0.34682	0.387199	0.33596	0.322574	0.317935	0.317572	0.389871	0.306051	0.365797	0.336993	0.331907	0.314479	0.325607	0.351416	0.340941	0.348252	0.315176	0.32157	0.311951	0.314053	0.311157	0.328978	0.346202	0.317648	0.313309	0.374579	0.342349	0.33542	0.312734	0.325919	0.336472	0.345042	0.306532	0.334223	0.330023
	5.16303	0.313737	0.315557	0.570821	0.326736	0.323942	0.403799	0.285944	0.304102	0.319938	0.360168	0.371621	0.318682	0.304512	0.349137	0.398161	0.34138	0.315494	0.309133	0.32312	0.378465	0.309545	0.370202	0.355526	0.342125	0.333618	0.326107	0.335299	0.348992	0.348546	0.330874	0.345279	0.306968	0.327907	0.311254	0.321934	0.343293	0.33133	0.320461	0.362152	0.348468	0.333259	0.321988	0.332548	0.327981	0.342632	0.305846	0.345849	0.331773
	5.19633	0.304446	0.305628	0.558439	0.310606	0.299347	0.398558	0.284322	0.305781	0.320522	0.362488	0.357943	0.303048	0.323766	0.354355	0.369909	0.355974	0.307321	0.319271	0.319946	0.379228	0.316939	0.35467	0.351194	0.338243	0.318569	0.314793	0.345866	0.342099	0.341224	0.320817	0.333143	0.308715	0.31338	0.29437	0.313502	0.345884	0.315428	0.315576	0.371581	0.352122	0.324206	0.312938	0.325334	0.34386	0.358986	0.29711	0.334189	0.33858
	5.22967	0.310133	0.310716	0.553283	0.320005	0.295021	0.38312	0.294569	0.300328	0.333953	0.336454	0.363219	0.314524	0.3157	0.35656	0.38134	0.343913	0.320304	0.298699	0.328439	0.377516	0.320932	0.367545	0.350805	0.335663	0.32898	0.332164	0.341806	0.326428	0.354021	0.317925	0.307384	0.32182	0.335627	0.308851	0.313378	0.329439	0.329461	0.313249	0.370172	0.352812	0.340915	0.324005	0.327041	0.333698	0.363827	0.318116	0.337801	0.325833
	5.263	0.31162	0.313708	0.55297	0.3279	0.315965	0.392925	0.302194	0.318638	0.323896	0.329839	0.360374	0.310058	0.319316	0.360456	0.370483	0.340863	0.319161	0.311933	0.319765	0.390459	0.30563	0.381187	0.325486	0.316724	0.326493	0.323035	0.34675	0.351891	0.35178	0.320564	0.331608	0.297115	0.333335	0.317547	0.296224	0.33858	0.327013	0.306083	0.372262	0.344694	0.346122	0.336265	0.338419	0.340311	0.339769	0.304772	0.329004	0.306512
	5.29633	0.315585	0.32216	0.55556	0.31613	0.305933	0.396572	0.303951	0.318639	0.329905	0.34478	0.350463	0.309465	0.306012	0.371439	0.367866	0.34273	0.324784	0.317693	0.314793	0.383671	0.316261	0.371918	0.342906	0.345675	0.308371	0.315461	0.322237	0.342661	0.345385	0.335108	0.31664	0.324021	0.314791	0.303291	0.309838	0.350476	0.330636	0.312685	0.387337	0.354352	0.337006	0.318916	0.329963	0.340237	0.343658	0.308411	0.330638	0.320547
	5.32972	0.318295	0.313428	0.553715	0.333048	0.309588	0.392587	0.30263	0.308893	0.330759	0.361264	0.358631	0.302811	0.31256	0.354835	0.390819	0.350545	0.315234	0.312041	0.314269	0.369055	0.323465	0.370245	0.350652	0.331545	0.334937	0.318583	0.340283	0.340165	0.351986	0.344337	0.331329	0.316146	0.322289	0.311585	0.305397	0.346468	0.343345	0.318468	0.377629	0.352749	0.331688	0.325947	0.34033	0.332469	0.348806	0.321483	0.336576	0.332147
	5.36305	0.309783	0.312386	0.536964	0.325599	0.317289	0.389366	0.28696	0.308759	0.327748	0.344887	0.370849	0.300666	0.306448	0.357245	0.403302	0.350696	0.317969	0.315173	0.322165	0.383906	0.323973	0.362071	0.333744	0.334308	0.314972	0.326495	0.338957	0.321723	0.361681	0.305191	0.322624	0.320055	0.319779	0.308051	0.309375	0.35405	0.325795	0.327057	0.373579	0.335742	0.321177	0.322659	0.322058	0.343265	0.354954	0.315929	0.335799	0.342283
	5.39638	0.303481	0.304192	0.539324	0.312975	0.309511	0.389224	0.300115	0.316562	0.335232	0.360748	0.355019	0.313248	0.312745	0.356661	0.386743	0.339709	0.308618	0.31396	0.32777	0.384786	0.309814	0.381513	0.333217	0.316178	0.324053	0.323912	0.356047	0.34776	0.338737	0.344517	0.311807	0.316382	0.32635	0.311106	0.330166	0.348384	0.324757	0.318345	0.374504	0.3584	0.343936	0.331458	0.341788	0.326931	0.353601	0.300662	0.342559	0.319546
	5.42967	0.313712	0.315035	0.533182	0.31991	0.322411	0.379336	0.305981	0.310855	0.335182	0.337683	0.351896	0.317179	0.308638	0.362589	0.380696	0.333657	0.311522	0.322209	0.317477	0.37199	0.322727	0.375309	0.333508	0.34218	0.32426	0.315829	0.357969	0.33685	0.348498	0.34366	0.347917	0.311192	0.321016	0.300125	0.31729	0.339344	0.341487	0.326197	0.377538	0.345195	0.323687	0.325046	0.321068	0.334946	0.354299	0.299175	0.347715	0.318214
	5.46303	0.318641	0.31581	0.544492	0.338756	0.309648	0.375836	0.29933	0.305903	0.338907	0.33852	0.35688	0.306579	0.317278	0.361142	0.380855	0.344956	0.311437	0.320055	0.326477	0.370268	0.320336	0.368509	0.326432	0.319237	0.319693	0.316223	0.340139	0.338254	0.336225	0.339804	0.319746	0.317761	0.325198	0.296904	0.310989	0.339354	0.324335	0.326021	0.379429	0.351366	0.320277	0.330678	0.331431	0.317764	0.34492	0.310135	0.325089	0.321968
	5.49632	0.307152	0.304377	0.519502	0.320457	0.321473	0.374163	0.310476	0.313931	0.328906	0.355341	0.353806	0.317374	0.289167	0.354028	0.402386	0.357691	0.31519	0.306643	0.316867	0.369736	0.321726	0.361592	0.344108	0.310981	0.3193	0.31869	0.34487	0.330714	0.352098	0.330314	0.32742	0.31239	0.319476	0.31652	0.308698	0.341865	0.309417	0.303881	0.366096	0.351612	0.337582	0.32163	0.329819	0.330967	0.359279	0.300879	0.322145	0.306463
	5.52968	0.315056	0.317525	0.519218	0.336276	0.311164	0.382926	0.301006	0.297549	0.324319	0.336005	0.368096	0.306221	0.316801	0.358143	0.391559	0.335623	0.318092	0.30603	0.321864	0.373407	0.321338	0.366213	0.314357	0.335817	0.321227	0.32507	0.340494	0.321415	0.338192	0.313877	0.334581	0.323926	0.320502	0.302364	0.305598	0.343618	0.332503	0.314074	0.386717	0.324046	0.32555	0.317448	0.334366	0.334175	0.340385	0.307629	0.345593	0.319445
	5.563	0.2968	0.313331	0.529069	0.323369	0.308828	0.365916	0.294906	0.305203	0.318741	0.349679	0.34	0.304304	0.308657	0.359943	0.384378	0.32809	0.318416	0.306243	0.313163	0.370394	0.313835	0.376501	0.345309	0.324508	0.320331	0.329161	0.355554	0.354358	0.349648	0.330842	0.328189	0.316087	0.321348	0.314458	0.308427	0.345541	0.3194	0.320691	0.362334	0.351187	0.340615	0.311825	0.326134	0.346255	0.333392	0.295148	0.340814	0.329351
	5.59633	0.310346	0.309373	0.522556	0.326452	0.307679	0.367532	0.292605	0.316061	0.329776	0.339999	0.346191	0.305829	0.328841	0.352862	0.39505	0.330072	0.309671	0.301543	0.322192	0.374298	0.320874	0.363176	0.353707	0.31183	0.318813	0.308347	0.330016	0.33971	0.352444	0.356376	0.318109	0.313188	0.317485	0.315082	0.307485	0.329498	0.326187	0.317988	0.374741	0.339297	0.343199	0.320661	0.336244	0.359818	0.36103	0.295857	0.31654	0.336724
	5.62968	0.311006	0.308194	0.501361	0.335338	0.30779	0.368936	0.290154	0.289721	0.330633	0.336283	0.349161	0.309011	0.296642	0.36373	0.380637	0.340734	0.315883	0.302814	0.327715	0.37608	0.300287	0.354304	0.336528	0.337267	0.306396	0.327696	0.346485	0.349773	0.345505	0.322667	0.342227	0.316162	0.329118	0.304556	0.320344	0.330818	0.31389	0.315431	0.388698	0.338204	0.346692	0.329971	0.324064	0.344628	0.365924	0.311199	0.345864	0.314226
	5.66302	0.314834	0.296852	0.502633	0.323669	0.308178	0.376972	0.288456	0.309181	0.327052	0.334189	0.345621	0.307748	0.303773	0.358478	0.401859	0.356584	0.309398	0.314464	0.30531	0.386964	0.321714	0.356743	0.337451	0.325851	0.32064	0.324468	0.348583	0.342353	0.341163	0.356811	0.31461	0.309752	0.315239	0.303546	0.313852	0.337994	0.335059	0.325722	0.379075	0.354264	0.336756	0.317639	0.330681	0.338233	0.35862	0.307205	0.329464	0.308474
	5.6963	0.309769	0.310613	0.503362	0.319062	0.311126	0.369963	0.301023	0.289109	0.3237	0.34083	0.351922	0.321431	0.324128	0.348472	0.390246	0.3423	0.313769	0.306198	0.308454	0.3718	0.306422	0.367665	0.333596	0.329969	0.333635	0.326598	0.361	0.343758	0.337118	0.321842	0.322334	0.309312	0.315811	0.322226	0.303925	0.341025	0.323575	0.306984	0.373694	0.336053	0.337532	0.335	0.338188	0.331288	0.349341	0.303814	0.33409	0.318631
	5.72965	0.321454	0.318455	0.490658	0.32335	0.319953	0.365302	0.308137	0.307846	0.330638	0.347182	0.348685	0.314662	0.3128	0.342871	0.387995	0.337685	0.314438	0.325158	0.316203	0.377317	0.31082	0.371527	0.33647	0.324723	0.323152	0.330185	0.334673	0.326058	0.342228	0.356171	0.326557	0.317649	0.314058	0.310902	0.31843	0.343496	0.321296	0.313752	0.3872	0.332879	0.329779	0.326097	0.317574	0.325389	0.340665	0.29853	0.343771	0.326955
	5.76298	0.319566	0.302181	0.497676	0.337681	0.313872	0.368584	0.294998	0.310096	0.322972	0.336562	0.337739	0.316202	0.321118	0.347085	0.398528	0.333868	0.305706	0.300486	0.323462	0.365357	0.310546	0.366664	0.34734	0.339347	0.31339	0.327508	0.357632	0.343935	0.343261	0.340355	0.312678	0.296232	0.319743	0.312511	0.303095	0.337806	0.334453	0.306656	0.37184	0.35209	0.327436	0.331228	0.339124	0.3252	0.363577	0.31127	0.348918	0.338174
	5.79637	0.312461	0.314365	0.499467	0.327762	0.311109	0.366788	0.297276	0.29934	0.333456	0.343383	0.34042	0.305193	0.334885	0.378275	0.391696	0.346162	0.30737	0.312811	0.324265	0.375811	0.309532	0.384997	0.359007	0.331841	0.323757	0.325592	0.358721	0.338092	0.349732	0.331729	0.302573	0.331205	0.32028	0.307723	0.309044	0.353235	0.337787	0.327843	0.382596	0.331031	0.35776	0.33032	0.339336	0.339311	0.349749	0.307486	0.348582	0.310897
	5.82967	0.307172	0.315994	0.501133	0.326331	0.313296	0.36528	0.298098	0.307563	0.328679	0.352313	0.354975	0.305817	0.297316	0.354878	0.392003	0.337288	0.318831	0.302753	0.3081	0.370951	0.319909	0.359062	0.330519	0.337378	0.317218	0.33112	0.346339	0.328694	0.34222	0.323724	0.316135	0.305586	0.311156	0.306191	0.337691	0.33965	0.322501	0.320001	0.3685	0.350927	0.330548	0.326849	0.32059	0.340826	0.341847	0.314801	0.348878	0.305096
	5.86302	0.316074	0.305934	0.471382	0.332127	0.304837	0.359001	0.301592	0.309524	0.32039	0.345933	0.341288	0.313718	0.308998	0.355138	0.379881	0.348837	0.31497	0.295204	0.3239	0.366553	0.315649	0.368111	0.356314	0.324211	0.314645	0.324049	0.346488	0.338659	0.345949	0.349799	0.318439	0.303288	0.311105	0.298902	0.316428	0.344495	0.320786	0.317121	0.370258	0.327718	0.322143	0.330449	0.3357	0.354921	0.355131	0.30489	0.332867	0.323306
	5.89637	0.30803	0.324038	0.486828	0.343403	0.319402	0.364561	0.304011	0.30917	0.323941	0.346498	0.356205	0.298628	0.321538	0.371101	0.393905	0.342615	0.306236	0.316873	0.324975	0.370618	0.328391	0.360975	0.339087	0.329489	0.328062	0.323456	0.339825	0.341851	0.339845	0.325684	0.308338	0.305743	0.322337	0.306094	0.318678	0.34407	0.318999	0.320945	0.378663	0.337504	0.33636	0.338393	0.32889	0.313632	0.362153	0.30212	0.357642	0.323574
	5.92968	0.313168	0.329921	0.468782	0.330215	0.298973	0.362806	0.290427	0.30189	0.306154	0.333764	0.345113	0.322984	0.306799	0.357171	0.382837	0.352394	0.322616	0.324535	0.314357	0.366666	0.309445	0.362484	0.335761	0.340923	0.319733	0.318386	0.343657	0.346777	0.342139	0.333497	0.343662	0.303462	0.309235	0.312407	0.312424	0.344935	0.337324	0.323557	0.378699	0.348089	0.327931	0.323452	0.334011	0.330869	0.354971	0.313394	0.350465	0.304562
	5.96302	0.319997	0.315508	0.483182	0.329349	0.316666	0.355462	0.294966	0.305977	0.319481	0.334171	0.351626	0.310718	0.313312	0.347567	0.385573	0.337782	0.303892	0.319695	0.305183	0.372103	0.318506	0.386395	0.339997	0.328719	0.329392	0.322804	0.336042	0.350449	0.3389	0.336348	0.314741	0.308189	0.32276	0.307714	0.282036	0.337434	0.326931	0.317802	0.370807	0.351023	0.345729	0.326565	0.336908	0.340722	0.359896	0.302589	0.334583	0.33575
	5.99633	0.302582	0.31291	0.471608	0.340222	0.307234	0.351849	0.292441	0.323639	0.314562	0.351809	0.351524	0.306962	0.304514	0.348053	0.394297	0.347019	0.297189	0.293433	0.315747	0.364896	0.31775	0.366135	0.350276	0.322093	0.31785	0.313888	0.333123	0.350254	0.334196	0.323952	0.316425	0.304757	0.309391	0.308429	0.316089	0.34543	0.330084	0.323646	0.375176	0.330005	0.338574	0.327156	0.336626	0.325795	0.346145	0.294979	0.343252	0.302734
	6.02967	0.318169	0.297121	0.476278	0.306581	0.310314	0.341354	0.294431	0.315882	0.323361	0.341731	0.338513	0.310023	0.324561	0.358694	0.389899	0.34785	0.318723	0.311028	0.321067	0.368247	0.308971	0.357309	0.340195	0.341146	0.31896	0.331699	0.34594	0.340502	0.336038	0.325698	0.329242	0.319036	0.320956	0.287089	0.322142	0.342164	0.335977	0.303446	0.384323	0.335497	0.357844	0.327573	0.343861	0.338426	0.3578	0.302081	0.34083	0.300425
	6.06302	0.307586	0.315277	0.479829	0.322765	0.306717	0.346648	0.299304	0.311189	0.327435	0.352091	0.343093	0.317755	0.30986	0.33331	0.383387	0.35378	0.33499	0.311492	0.320419	0.35399	0.308527	0.369969	0.339836	0.344343	0.307136	0.308943	0.343839	0.339802	0.350365	0.330306	0.326552	0.301129	0.314131	0.290141	0.30154	0.351084	0.342003	0.314518	0.375871	0.346538	0.324426	0.326492	0.315124	0.333385	0.350795	0.311948	0.338777	0.32343
	6.09635	0.312764	0.317907	0.473787	0.328244	0.321189	0.35518	0.298562	0.312377	0.318677	0.356982	0.335006	0.305392	0.315141	0.346057	0.373098	0.349369	0.311286	0.308464	0.332588	0.356245	0.312368	0.381263	0.347479	0.323008	0.317662	0.330357	0.344219	0.342508	0.339615	0.346796	0.321478	0.307945	0.319122	0.311725	0.318798	0.342781	0.3392	0.316053	0.371494	0.356422	0.327852	0.31235	0.337757	0.337982	0.345841	0.30943	0.354727	0.316289
	6.12968	0.311916	0.305247	0.468312	0.317658	0.302834	0.349106	0.293392	0.317848	0.32055	0.357205	0.345691	0.322779	0.305053	0.347875	0.379159	0.335088	0.32232	0.311076	0.301238	0.359923	0.316277	0.366137	0.334146	0.339902	0.323126	0.324056	0.358802	0.323934	0.333024	0.359679	0.325207	0.311156	0.316237	0.313865	0.323133	0.337366	0.343563	0.317592	0.387007	0.355091	0.335807	0.3315	0.327526	0.319783	0.359328	0.303915	0.335569	0.311137
	6.163	0.31459	0.319165	0.463177	0.316121	0.300168	0.344386	0.295261	0.304001	0.317923	0.34343	0.343631	0.305812	0.310787	0.360285	0.378745	0.334439	0.322633	0.300688	0.324038	0.367263	0.318523	0.367618	0.334204	0.307042	0.327365	0.3178	0.347834	0.328535	0.330445	0.330749	0.317795	0.304443	0.323299	0.299059	0.312628	0.336236	0.316607	0.314281	0.387531	0.344327	0.345722	0.331351	0.324598	0.347734	0.360019	0.292024	0.330659	0.316292
	6.19637	0.303699	0.32579	0.451147	0.324548	0.309217	0.355074	0.308205	0.308072	0.325378	0.35171	0.341849	0.30737	0.307109	0.356799	0.391534	0.341987	0.302546	0.311661	0.316342	0.344422	0.328339	0.36766	0.329629	0.314623	0.310876	0.328956	0.346068	0.337392	0.339585	0.343742	0.320562	0.308681	0.317906	0.305047	0.309156	0.336616	0.318032	0.31384	0.364211	0.330098	0.325205	0.316688	0.325133	0.333198	0.363161	0.312197	0.330467	0.334329
	6.22967	0.312554	0.317359	0.463256	0.324653	0.317783	0.337259	0.297651	0.307855	0.329676	0.35241	0.342607	0.287439	0.309121	0.363846	0.396982	0.330419	0.310792	0.297981	0.33164	0.353309	0.316396	0.380606	0.332544	0.337909	0.315139	0.327269	0.34186	0.331565	0.349919	0.324844	0.321976	0.324798	0.31692	0.318685	0.310066	0.35352	0.310738	0.321861	0.396967	0.344876	0.339938	0.309138	0.322674	0.330555	0.34667	0.299509	0.329707	0.320738
	6.26303	0.311209	0.301108	0.464483	0.321051	0.334059	0.343429	0.296975	0.328165	0.321361	0.328786	0.334364	0.301825	0.296927	0.342613	0.393077	0.331411	0.305042	0.304501	0.319762	0.356212	0.332726	0.356936	0.333962	0.333139	0.307409	0.314489	0.357989	0.3375	0.337822	0.311058	0.326746	0.319259	0.319601	0.304134	0.312091	0.338376	0.344516	0.315706	0.372308	0.363604	0.341726	0.329197	0.320007	0.329398	0.344959	0.305837	0.340366	0.311922
	6.29633	0.306106	0.314729	0.446593	0.318215	0.306233	0.343546	0.298318	0.309005	0.31771	0.339653	0.335678	0.307844	0.307331	0.35846	0.381853	0.34172	0.322431	0.316472	0.327038	0.359253	0.317266	0.374222	0.335967	0.327075	0.322706	0.311071	0.339319	0.341992	0.339801	0.339071	0.321995	0.308378	0.318827	0.304573	0.320064	0.350678	0.340382	0.323065	0.387277	0.338358	0.326062	0.323173	0.332039	0.345376	0.331467	0.302578	0.33159	0.324236
	6.3297	0.312593	0.315871	0.461321	0.316877	0.307638	0.349985	0.296069	0.307374	0.330426	0.325146	0.324593	0.31582	0.298908	0.343777	0.395627	0.343406	0.301155	0.309507	0.322854	0.350577	0.308825	0.373745	0.350577	0.310864	0.323281	0.328704	0.333701	0.343457	0.326606	0.371091	0.335488	0.308443	0.30693	0.300311	0.321591	0.344509	0.315174	0.317381	0.38062	0.352978	0.324302	0.315161	0.328935	0.334016	0.35355	0.307473	0.342376	0.305179
	6.36302	0.316486	0.315459	0.450267	0.315188	0.30248	0.344199	0.296161	0.321051	0.328476	0.347845	0.342336	0.305443	0.314225	0.36025	0.394359	0.336736	0.313209	0.309808	0.323129	0.355596	0.319966	0.366466	0.34296	0.354563	0.319625	0.323369	0.335001	0.32685	0.361391	0.349845	0.336203	0.310104	0.303166	0.29843	0.308321	0.341862	0.311043	0.304596	0.366575	0.35579	0.333239	0.318235	0.326824	0.325566	0.343697	0.307593	0.334445	0.310363
	6.39633	0.319637	0.313456	0.441154	0.320056	0.32471	0.343608	0.307833	0.328124	0.341945	0.3306	0.349191	0.297941	0.314882	0.371705	0.383001	0.345814	0.318911	0.317261	0.337341	0.354592	0.311709	0.386609	0.326505	0.325843	0.316984	0.316473	0.334748	0.3385	0.329509	0.350404	0.332576	0.305222	0.322401	0.303828	0.303579	0.337038	0.31995	0.301683	0.367129	0.336966	0.330861	0.326066	0.336135	0.327231	0.355636	0.316584	0.358462	0.304696
	6.4297	0.304239	0.314672	0.44654	0.323384	0.314606	0.344961	0.28797	0.320202	0.316005	0.340847	0.337227	0.309463	0.314786	0.347989	0.389229	0.327083	0.306549	0.314407	0.327891	0.356558	0.321249	0.349403	0.313051	0.32661	0.323731	0.326951	0.33243	0.331312	0.332973	0.328183	0.30913	0.293475	0.311813	0.302713	0.324555	0.34374	0.320736	0.317255	0.391394	0.351483	0.344164	0.316128	0.325321	0.329831	0.346785	0.306092	0.323185	0.311088
	6.463	0.309738	0.319281	0.443256	0.321434	0.301473	0.340494	0.30057	0.320665	0.3247	0.319683	0.344321	0.305195	0.309628	0.359135	0.376202	0.325277	0.314167	0.312724	0.315786	0.354973	0.33262	0.355773	0.339348	0.316451	0.32847	0.326691	0.352854	0.352338	0.343997	0.322995	0.298567	0.308018	0.318174	0.303118	0.311446	0.344857	0.315392	0.323045	0.376951	0.353336	0.349567	0.321816	0.33674	0.336201	0.368626	0.305766	0.338638	0.342166
	6.49633	0.308066	0.318979	0.455731	0.324678	0.321953	0.341811	0.309046	0.305307	0.324575	0.332509	0.340833	0.306724	0.3001	0.356076	0.395371	0.343583	0.294185	0.317369	0.316432	0.358614	0.312895	0.388525	0.334695	0.328858	0.309427	0.329733	0.341215	0.356683	0.333184	0.342216	0.330545	0.314978	0.315864	0.3069	0.314191	0.343161	0.33097	0.317803	0.37009	0.341073	0.339783	0.338664	0.337515	0.341873	0.34632	0.302092	0.352494	0.311064
	6.52968	0.30899	0.305863	0.442506	0.326292	0.320932	0.335182	0.30277	0.309667	0.326535	0.329406	0.340564	0.305885	0.308242	0.349597	0.393227	0.351621	0.307419	0.300936	0.318066	0.365029	0.315602	0.382011	0.345569	0.331242	0.327327	0.316912	0.352015	0.345509	0.344674	0.335837	0.326536	0.312843	0.318935	0.312155	0.317603	0.362539	0.304204	0.311819	0.377192	0.344372	0.332182	0.332005	0.326645	0.357571	0.355061	0.300353	0.334016	0.3179
	6.56298	0.308782	0.308368	0.436095	0.320656	0.307739	0.340677	0.318583	0.328912	0.317802	0.340935	0.345395	0.311061	0.3074	0.344856	0.375775	0.342289	0.341524	0.318869	0.319156	0.353282	0.309864	0.376539	0.330391	0.346115	0.306637	0.322222	0.3482	0.325568	0.335042	0.330203	0.308312	0.319315	0.314407	0.312653	0.303673	0.347716	0.3324	0.327803	0.388312	0.350474	0.348466	0.326959	0.33146	0.320113	0.339568	0.301719	0.331651	0.308808
	6.59635	0.308094	0.312256	0.436891	0.306537	0.307963	0.339937	0.297922	0.303474	0.321571	0.324477	0.343453	0.302491	0.312741	0.352678	0.385438	0.344765	0.296769	0.307171	0.313889	0.371246	0.318729	0.362717	0.352996	0.337313	0.313808	0.326681	0.337661	0.353355	0.34199	0.348241	0.341183	0.311526	0.311087	0.310428	0.298504	0.33726	0.310534	0.30431	0.374949	0.341143	0.339796	0.319519	0.320147	0.346755	0.347271	0.296192	0.330497	0.317141
	6.6297	0.314629	0.310672	0.445255	0.321693	0.307383	0.350768	0.302665	0.302453	0.319357	0.345899	0.342515	0.311948	0.314544	0.338129	0.389046	0.326935	0.297142	0.290918	0.329781	0.348122	0.33055	0.359754	0.362018	0.314524	0.321467	0.317882	0.339216	0.326989	0.339425	0.314274	0.304806	0.303575	0.315062	0.318085	0.311206	0.360571	0.314131	0.321782	0.373585	0.334946	0.326492	0.331976	0.332994	0.342752	0.336356	0.31178	0.31948	0.296962
	6.663	0.317626	0.318623	0.430025	0.324326	0.319941	0.33378	0.297135	0.289666	0.320365	0.340232	0.332939	0.309443	0.301174	0.372057	0.38409	0.353201	0.294625	0.302076	0.331394	0.348736	0.31006	0.387832	0.320862	0.343327	0.313552	0.317278	0.346586	0.326006	0.337247	0.317144	0.303748	0.324151	0.305008	0.306255	0.297343	0.350358	0.332256	0.313796	0.380328	0.352522	0.346552	0.328075	0.331387	0.33493	0.35153	0.301614	0.355338	0.318791
	6.69633	0.304771	0.30862	0.433509	0.330435	0.311556	0.339583	0.304916	0.313241	0.322609	0.320821	0.344942	0.308776	0.309962	0.356387	0.390532	0.334607	0.310922	0.314848	0.321886	0.352639	0.322874	0.352219	0.326864	0.313395	0.314555	0.33724	0.33479	0.336739	0.337585	0.339335	0.319853	0.318659	0.313847	0.290725	0.308404	0.356353	0.333382	0.311097	0.397405	0.342679	0.343871	0.327947	0.322937	0.330415	0.341861	0.311284	0.326962	0.329732
	6.72965	0.310703	0.311066	0.428637	0.322005	0.320103	0.332294	0.292857	0.313313	0.326422	0.339361	0.342415	0.321241	0.30847	0.358251	0.401575	0.346976	0.299293	0.315163	0.333624	0.34392	0.313896	0.363815	0.329178	0.346018	0.317036	0.328289	0.343734	0.33956	0.341034	0.342144	0.313551	0.314051	0.315535	0.309307	0.298032	0.347773	0.352176	0.313438	0.373558	0.360974	0.331826	0.327587	0.322398	0.340217	0.333571	0.301178	0.334054	0.314122
	6.76303	0.306752	0.307898	0.414893	0.315622	0.298183	0.33051	0.288642	0.312335	0.325658	0.348057	0.342565	0.303568	0.30052	0.348345	0.380799	0.336896	0.311821	0.30303	0.325902	0.351235	0.314171	0.358453	0.339656	0.344101	0.324109	0.319178	0.334343	0.319968	0.340176	0.341339	0.335647	0.310539	0.318518	0.290501	0.302013	0.343727	0.320818	0.311654	0.39239	0.353148	0.319831	0.327268	0.32854	0.335226	0.346878	0.317873	0.341245	0.315685
	6.79633	0.313685	0.32438	0.420183	0.313408	0.31569	0.333385	0.301025	0.311643	0.326564	0.333418	0.338126	0.317948	0.309839	0.348789	0.376892	0.334926	0.312963	0.307927	0.314099	0.344939	0.324759	0.359556	0.341199	0.322087	0.329554	0.32388	0.33691	0.330532	0.330274	0.332774	0.342244	0.297663	0.307221	0.313668	0.305166	0.341298	0.301275	0.320131	0.383902	0.323931	0.325167	0.326381	0.337944	0.338698	0.35112	0.297528	0.345549	0.335441
	6.82967	0.299876	0.310222	0.424142	0.317879	0.311565	0.335053	0.293717	0.290394	0.314892	0.343616	0.340475	0.312617	0.316869	0.360657	0.394592	0.34005	0.315336	0.299072	0.31061	0.346227	0.314353	0.371556	0.35077	0.329313	0.315877	0.34342	0.339598	0.338092	0.331417	0.334348	0.341785	0.315219	0.316647	0.304308	0.297727	0.343552	0.331054	0.311753	0.371868	0.342702	0.33663	0.324131	0.323636	0.328448	0.332399	0.299104	0.33357	0.312875
	6.86298	0.315404	0.314527	0.423316	0.308455	0.322755	0.33453	0.283673	0.309861	0.311881	0.32128	0.333555	0.308272	0.309066	0.352125	0.393443	0.334302	0.306621	0.310552	0.317243	0.347407	0.328903	0.367807	0.330256	0.341297	0.326476	0.318172	0.355911	0.317583	0.34461	0.341826	0.316447	0.311451	0.309945	0.303244	0.323847	0.344963	0.33758	0.313543	0.378869	0.349021	0.336158	0.329292	0.334272	0.349933	0.355355	0.299371	0.342163	0.313668
	6.89628	0.311029	0.317711	0.416093	0.317049	0.319924	0.330562	0.29744	0.320597	0.328507	0.336867	0.332786	0.322848	0.310243	0.368244	0.382481	0.34181	0.303606	0.306032	0.321978	0.342723	0.309865	0.365599	0.343927	0.314952	0.326329	0.328369	0.345823	0.326123	0.333306	0.352762	0.320206	0.322603	0.319684	0.300431	0.316082	0.354741	0.321246	0.316233	0.377451	0.335699	0.34586	0.321653	0.337568	0.338619	0.344823	0.307118	0.347049	0.32854
	6.9297	0.310459	0.311633	0.414763	0.319445	0.318492	0.334641	0.296633	0.296384	0.323882	0.342414	0.325475	0.322631	0.307065	0.34585	0.386307	0.334024	0.305294	0.322195	0.319662	0.348848	0.320243	0.360161	0.340397	0.326825	0.312354	0.331519	0.351081	0.341323	0.338813	0.344268	0.327544	0.307851	0.311379	0.307376	0.29816	0.351323	0.327022	0.309609	0.382856	0.366973	0.33799	0.334717	0.324893	0.348618	0.35682	0.305372	0.340879	0.309515
	6.96303	0.331954	0.31484	0.4234	0.326908	0.305736	0.33066	0.295142	0.292163	0.313614	0.337168	0.328652	0.316641	0.313863	0.367973	0.390729	0.328534	0.312532	0.306035	0.320529	0.333696	0.325957	0.35958	0.336854	0.330909	0.316902	0.32347	0.337714	0.353252	0.341149	0.33718	0.331116	0.32542	0.317289	0.315038	0.295809	0.344124	0.337383	0.322924	0.372985	0.333006	0.335913	0.321843	0.334974	0.337011	0.347298	0.299532	0.34543	0.315462
	6.99637	0.31938	0.314712	0.417477	0.318118	0.3206	0.3255	0.307987	0.319656	0.323451	0.337835	0.334817	0.307573	0.325619	0.359763	0.384137	0.333543	0.306229	0.323981	0.321911	0.355743	0.316513	0.367627	0.330528	0.30256	0.324221	0.334637	0.35084	0.328161	0.332332	0.331409	0.330812	0.291928	0.308112	0.308949	0.309836	0.345338	0.340203	0.337679	0.377772	0.343694	0.341145	0.326057	0.331174	0.316118	0.35364	0.308302	0.328687	0.315043
	7.0297	0.316458	0.315252	0.409042	0.316382	0.316656	0.324753	0.30857	0.298869	0.324964	0.337022	0.331617	0.316883	0.30312	0.340625	0.372971	0.336803	0.312743	0.306748	0.32889	0.339893	0.314586	0.37883	0.33407	0.326681	0.316446	0.334868	0.356483	0.330971	0.338678	0.339434	0.306921	0.313112	0.305085	0.30447	0.303211	0.345714	0.320988	0.317454	0.377797	0.325197	0.327123	0.317895	0.325675	0.346791	0.364673	0.312183	0.325436	0.30795
	7.06302	0.313741	0.313473	0.413362	0.317999	0.317107	0.327698	0.309645	0.322496	0.325733	0.322082	0.329932	0.294864	0.32059	0.347228	0.385016	0.337931	0.318671	0.318937	0.313136	0.340273	0.307332	0.35129	0.36609	0.319767	0.315873	0.318798	0.336124	0.330656	0.335184	0.347796	0.297049	0.31141	0.312982	0.296412	0.314869	0.343838	0.335294	0.312754	0.376553	0.37375	0.339349	0.32439	0.330844	0.346576	0.356794	0.309408	0.319392	0.291409
	7.09633	0.326304	0.322901	0.418514	0.318728	0.318007	0.334652	0.303112	0.311905	0.327407	0.320451	0.335073	0.315432	0.32121	0.368252	0.388238	0.362318	0.320198	0.314546	0.314613	0.340066	0.320069	0.360961	0.349366	0.316658	0.319407	0.335973	0.335425	0.337448	0.340863	0.341086	0.324943	0.31388	0.306998	0.309197	0.300618	0.339913	0.314185	0.312345	0.374886	0.361133	0.341274	0.324744	0.322126	0.332178	0.350317	0.306113	0.331779	0.304572
	7.12967	0.314165	0.318035	0.41223	0.323983	0.314576	0.321995	0.299363	0.299124	0.321927	0.318211	0.335244	0.309118	0.320096	0.346674	0.384475	0.342432	0.316213	0.28065	0.309775	0.354004	0.334051	0.373636	0.349591	0.335921	0.329365	0.324317	0.358936	0.336263	0.330583	0.335049	0.332204	0.310395	0.308667	0.306495	0.311752	0.341739	0.310976	0.321604	0.379897	0.349945	0.347551	0.320517	0.314646	0.329347	0.348566	0.301907	0.325876	0.32283
	7.16303	0.326652	0.315503	0.408517	0.322207	0.323189	0.326498	0.300768	0.326143	0.322271	0.323413	0.322454	0.331015	0.312512	0.361161	0.383169	0.337346	0.299468	0.2922	0.328462	0.342103	0.323986	0.365672	0.338245	0.335678	0.314878	0.33495	0.35294	0.33721	0.336893	0.324205	0.319183	0.310527	0.310071	0.293723	0.317812	0.338295	0.301512	0.314693	0.388571	0.334883	0.323853	0.337819	0.333677	0.339126	0.361985	0.31828	0.326407	0.345994
	7.19632	0.298917	0.313271	0.407364	0.326526	0.311495	0.33535	0.303854	0.304414	0.315338	0.338009	0.336289	0.305969	0.310279	0.341489	0.401712	0.341574	0.31291	0.300962	0.328569	0.354498	0.325007	0.37612	0.333041	0.313102	0.322168	0.319296	0.336247	0.33597	0.327953	0.349763	0.311678	0.327111	0.314841	0.30766	0.309816	0.32847	0.32559	0.323545	0.385523	0.33726	0.352295	0.32573	0.31076	0.337632	0.364132	0.303757	0.334	0.320014
	7.2297	0.313982	0.305389	0.421922	0.314513	0.310848	0.321884	0.300253	0.295197	0.319896	0.335555	0.332618	0.287442	0.315357	0.354427	0.396668	0.349626	0.293042	0.305186	0.318823	0.344798	0.318881	0.357505	0.334019	0.314728	0.319197	0.318712	0.350855	0.3252	0.327847	0.330805	0.311394	0.309433	0.308256	0.307871	0.32962	0.329369	0.354129	0.312716	0.387687	0.346999	0.343394	0.328989	0.34042	0.349203	0.351335	0.303913	0.357698	0.324657
	7.263	0.31792	0.307322	0.398136	0.31411	0.311051	0.322185	0.299877	0.30923	0.32443	0.336029	0.331458	0.310447	0.303079	0.345669	0.382686	0.342981	0.31842	0.308267	0.328903	0.345464	0.318067	0.35716	0.327625	0.308817	0.316257	0.317283	0.353535	0.338972	0.342967	0.341123	0.322273	0.318047	0.313659	0.284251	0.300563	0.355133	0.335285	0.321244	0.382915	0.346667	0.34863	0.324302	0.328411	0.323124	0.355863	0.29673	0.326662	0.319537
	7.29638	0.308667	0.315945	0.410321	0.332892	0.317093	0.321525	0.313011	0.307211	0.322025	0.344636	0.330354	0.318115	0.325103	0.340837	0.37475	0.343659	0.308298	0.305272	0.322361	0.343676	0.311866	0.361202	0.360347	0.304108	0.332429	0.329766	0.346968	0.331266	0.332436	0.352012	0.317456	0.302652	0.315722	0.287587	0.325724	0.34578	0.335073	0.328749	0.379882	0.351649	0.332809	0.319442	0.3279	0.333627	0.361921	0.30393	0.334212	0.317506
	7.32972	0.319555	0.317861	0.414571	0.315594	0.316395	0.331444	0.304146	0.313208	0.325807	0.332961	0.339526	0.318321	0.31574	0.347883	0.388725	0.345771	0.298924	0.308544	0.309753	0.355509	0.328994	0.36139	0.334357	0.331234	0.321761	0.320823	0.345842	0.334379	0.345397	0.330345	0.33806	0.321311	0.317426	0.2916	0.28159	0.342124	0.325928	0.328442	0.372822	0.344218	0.370093	0.319237	0.328536	0.342334	0.340583	0.308015	0.346316	0.332905
	7.363	0.320568	0.315061	0.401931	0.327116	0.313197	0.324716	0.305808	0.296645	0.332721	0.332533	0.333232	0.318974	0.309794	0.357424	0.365407	0.322287	0.307086	0.302836	0.328288	0.35065	0.337849	0.350579	0.338116	0.332657	0.347189	0.32308	0.353349	0.334965	0.335482	0.325709	0.321508	0.308368	0.318485	0.295405	0.312215	0.346083	0.330684	0.327206	0.384319	0.343516	0.326744	0.330568	0.333477	0.338341	0.356678	0.295957	0.354082	0.3153
	7.39635	0.312116	0.313435	0.406584	0.323256	0.306376	0.323254	0.290403	0.302452	0.32157	0.333972	0.336093	0.308811	0.304786	0.363621	0.374421	0.345984	0.311272	0.306108	0.306586	0.34167	0.309364	0.363851	0.31301	0.325406	0.313159	0.321128	0.339156	0.332917	0.35029	0.334329	0.32793	0.313231	0.309042	0.303794	0.30508	0.332437	0.307158	0.317368	0.37466	0.346238	0.341786	0.316671	0.331114	0.336176	0.357146	0.310678	0.323138	0.325198
	7.42967	0.302979	0.321302	0.3975	0.31809	0.303673	0.336949	0.300407	0.302469	0.323768	0.331514	0.332856	0.308977	0.298637	0.343053	0.375731	0.346651	0.29135	0.304939	0.331194	0.337372	0.311082	0.358839	0.310952	0.330032	0.333343	0.331526	0.344717	0.332163	0.33189	0.344267	0.298684	0.308873	0.309531	0.301537	0.302124	0.345032	0.321584	0.313492	0.377063	0.343312	0.339554	0.331381	0.336404	0.322116	0.345089	0.301431	0.341376	0.313614
	7.46305	0.323865	0.310185	0.390286	0.318009	0.31933	0.32549	0.297898	0.311438	0.323634	0.330227	0.334244	0.323588	0.31382	0.332679	0.371169	0.344096	0.313918	0.301666	0.338989	0.348377	0.305996	0.368166	0.33532	0.313946	0.329665	0.316594	0.356423	0.321191	0.331556	0.34915	0.32408	0.299033	0.314795	0.304975	0.30123	0.351012	0.329361	0.318506	0.380169	0.343451	0.328525	0.328765	0.324254	0.322629	0.353727	0.291725	0.325838	0.313321
	7.49633	0.306874	0.320823	0.402405	0.321176	0.304186	0.319773	0.301316	0.293799	0.324361	0.338218	0.336504	0.314392	0.307138	0.340697	0.387957	0.340585	0.316116	0.302402	0.316969	0.358686	0.306786	0.371606	0.332804	0.347262	0.317689	0.317333	0.338004	0.323162	0.343525	0.327638	0.324344	0.31131	0.309286	0.281913	0.324743	0.338624	0.323275	0.329689	0.377391	0.345783	0.335172	0.333218	0.328804	0.331484	0.343105	0.301516	0.339165	0.321211
	7.52968	0.321647	0.307725	0.393429	0.325995	0.313941	0.318483	0.291277	0.298757	0.319207	0.330107	0.341006	0.308328	0.313338	0.374904	0.382473	0.345655	0.307437	0.302213	0.314749	0.364006	0.328885	0.363338	0.322132	0.335474	0.341125	0.327131	0.351533	0.331049	0.327839	0.316048	0.315519	0.302039	0.316847	0.304615	0.332428	0.347844	0.320163	0.327133	0.388988	0.336345	0.339914	0.327045	0.358922	0.325814	0.351218	0.314564	0.333342	0.32792
	7.56305	0.309086	0.317524	0.393118	0.323255	0.309189	0.328795	0.300739	0.308443	0.315568	0.344247	0.328269	0.315476	0.313296	0.347519	0.386472	0.335955	0.300253	0.315531	0.313131	0.34387	0.322839	0.350861	0.333464	0.335517	0.320931	0.319071	0.358823	0.33118	0.34583	0.339438	0.330227	0.305631	0.313738	0.306621	0.303808	0.34453	0.325238	0.317319	0.377315	0.345315	0.336205	0.323066	0.330724	0.34032	0.353487	0.309555	0.336498	0.327727
	7.59633	0.31234	0.314759	0.391178	0.328808	0.316508	0.321555	0.300561	0.325664	0.333947	0.348026	0.334442	0.302771	0.314303	0.371215	0.377516	0.33581	0.299595	0.303049	0.328691	0.349644	0.317263	0.360644	0.341139	0.335602	0.31293	0.316165	0.347153	0.324036	0.338411	0.344287	0.324466	0.31047	0.325489	0.305717	0.305583	0.342907	0.323294	0.321652	0.377945	0.336745	0.334555	0.327057	0.32164	0.33994	0.355531	0.300156	0.338689	0.326092
	7.62968	0.304291	0.314367	0.38693	0.310463	0.296191	0.321505	0.317837	0.310528	0.334621	0.336063	0.333119	0.315537	0.325791	0.3536	0.390084	0.351114	0.308283	0.307823	0.325639	0.348917	0.314205	0.371646	0.319677	0.327748	0.315795	0.334194	0.347739	0.31353	0.331004	0.338777	0.329226	0.311946	0.318079	0.297515	0.33624	0.350835	0.330894	0.316759	0.365669	0.355269	0.315744	0.323578	0.326332	0.337124	0.353451	0.308302	0.333652	0.321853
	7.66302	0.321121	0.310697	0.393519	0.327061	0.316807	0.318993	0.307959	0.306152	0.319814	0.360273	0.341429	0.301635	0.312396	0.35326	0.378749	0.334025	0.319169	0.326308	0.31851	0.349463	0.316162	0.375262	0.348365	0.3373	0.315044	0.316822	0.345957	0.323882	0.33999	0.367884	0.322935	0.315295	0.310817	0.317591	0.323189	0.348807	0.318266	0.321449	0.384868	0.343967	0.329926	0.333688	0.347152	0.348191	0.358562	0.314069	0.33777	0.32328
	7.69632	0.312534	0.302863	0.384113	0.330651	0.313852	0.311665	0.303475	0.301274	0.334195	0.321344	0.327922	0.301032	0.326023	0.341596	0.374929	0.345448	0.307223	0.311892	0.314035	0.341364	0.306913	0.361159	0.311988	0.346529	0.316926	0.33465	0.348675	0.335853	0.331748	0.307852	0.333774	0.303584	0.304488	0.29085	0.294878	0.335552	0.33738	0.317372	0.374363	0.345263	0.340884	0.325929	0.339231	0.343558	0.351159	0.302683	0.357805	0.325535
	7.72967	0.313285	0.316276	0.383402	0.324677	0.327437	0.322036	0.290614	0.294047	0.324394	0.333769	0.327119	0.318769	0.314511	0.347598	0.378671	0.332685	0.320475	0.304964	0.323247	0.342246	0.314022	0.370122	0.330113	0.330264	0.315456	0.325101	0.34607	0.341167	0.331336	0.328886	0.306465	0.307352	0.325946	0.305305	0.298832	0.348889	0.338937	0.314439	0.385021	0.348597	0.321243	0.320741	0.327676	0.340751	0.354462	0.308013	0.34788	0.29987
	7.76303	0.322209	0.319559	0.387666	0.317262	0.305984	0.316047	0.297283	0.308256	0.320371	0.327324	0.336635	0.308649	0.318349	0.361432	0.382356	0.329667	0.317527	0.300153	0.324927	0.338777	0.328776	0.367276	0.346038	0.31057	0.322339	0.322078	0.351816	0.333867	0.328678	0.334102	0.335268	0.311992	0.307513	0.296718	0.3136	0.350488	0.325349	0.308076	0.386468	0.328855	0.3428	0.327812	0.32252	0.346264	0.35031	0.300104	0.316844	0.332059
	7.79633	0.308622	0.301727	0.394592	0.320231	0.311075	0.328151	0.28995	0.311295	0.330233	0.331345	0.338785	0.320079	0.313111	0.355689	0.382648	0.329032	0.311928	0.317647	0.31129	0.333206	0.314115	0.363195	0.350944	0.311161	0.32003	0.329056	0.358869	0.328947	0.322849	0.324643	0.324374	0.325506	0.315013	0.292976	0.324866	0.348713	0.3203	0.318573	0.37851	0.335228	0.321885	0.332625	0.320282	0.333827	0.348394	0.298877	0.328169	0.33034
	7.82967	0.323168	0.315326	0.387309	0.325178	0.300935	0.323841	0.29049	0.305821	0.322489	0.345488	0.344056	0.311758	0.32362	0.353932	0.391021	0.346459	0.303664	0.30864	0.337219	0.347939	0.302013	0.365176	0.320684	0.328642	0.309343	0.317561	0.347912	0.337427	0.339691	0.335484	0.326124	0.313926	0.31825	0.306673	0.328959	0.347426	0.338623	0.320648	0.386019	0.354304	0.333723	0.333273	0.329255	0.344122	0.353842	0.310747	0.346431	0.303846
	7.863	0.327757	0.319797	0.386716	0.326441	0.318347	0.321238	0.29833	0.321733	0.321843	0.33271	0.333353	0.300829	0.307738	0.34438	0.372935	0.338931	0.299241	0.299095	0.325458	0.335384	0.322546	0.37848	0.346969	0.337273	0.310983	0.309675	0.343779	0.3358	0.335547	0.337616	0.338221	0.324838	0.309079	0.304612	0.311348	0.351245	0.331809	0.310815	0.383851	0.357155	0.334878	0.327824	0.334046	0.339447	0.344195	0.298001	0.337788	0.321437
	7.89637	0.3263	0.317235	0.393981	0.325481	0.309389	0.327515	0.293223	0.319895	0.325384	0.343039	0.332289	0.305555	0.304819	0.352465	0.359589	0.346191	0.30021	0.30541	0.315499	0.3466	0.311627	0.355678	0.319478	0.314195	0.312719	0.318908	0.347594	0.336581	0.336963	0.358867	0.323291	0.30238	0.316448	0.312424	0.301228	0.335744	0.333408	0.320953	0.37776	0.3407	0.334442	0.32268	0.320407	0.332275	0.345601	0.309166	0.356162	0.305442
	7.92968	0.30842	0.3208	0.385522	0.316805	0.319065	0.316882	0.306223	0.303101	0.322081	0.355988	0.326913	0.312547	0.317597	0.351616	0.384638	0.338278	0.295382	0.305862	0.335281	0.329149	0.320092	0.347805	0.33819	0.327225	0.315625	0.31765	0.342963	0.331201	0.3441	0.340189	0.32793	0.30296	0.318595	0.304618	0.319313	0.335069	0.317931	0.301067	0.3788	0.347294	0.334216	0.329031	0.321434	0.330368	0.332281	0.302826	0.329153	0.304088
	7.96298	0.324455	0.315012	0.384047	0.324305	0.308481	0.32532	0.289459	0.308091	0.321992	0.340893	0.325924	0.293533	0.319554	0.345148	0.407476	0.335556	0.315525	0.291559	0.328822	0.356281	0.318903	0.372233	0.350789	0.331198	0.312044	0.320786	0.346085	0.329889	0.333297	0.33676	0.319835	0.317785	0.313568	0.315876	0.30792	0.329211	0.323143	0.328996	0.37048	0.347197	0.338669	0.309351	0.331095	0.330079	0.345684	0.304446	0.341883	0.342035
	7.99637	0.324936	0.308001	0.383887	0.313093	0.300959	0.322899	0.290974	0.309254	0.322914	0.342568	0.328626	0.326767	0.32197	0.350821	0.39645	0.340422	0.304997	0.314324	0.326281	0.333832	0.315629	0.358541	0.346085	0.331265	0.32802	0.328068	0.338108	0.332089	0.327744	0.342657	0.314993	0.3222	0.317809	0.289566	0.31583	0.347096	0.328493	0.315019	0.384308	0.362394	0.341103	0.332679	0.335385	0.33327	0.345737	0.315222	0.339578	0.324153
	8.0297	0.315302	0.312732	0.38863	0.320044	0.315743	0.322457	0.314726	0.309953	0.325136	0.350875	0.325318	0.310627	0.314398	0.35227	0.37607	0.335131	0.309078	0.312823	0.325552	0.336294	0.315907	0.377902	0.341863	0.337908	0.306838	0.309111	0.340639	0.323606	0.330317	0.340187	0.323418	0.321008	0.306195	0.303297	0.324545	0.343946	0.335294	0.308905	0.354682	0.358637	0.351601	0.321788	0.321418	0.341631	0.347802	0.310518	0.336761	0.307464
	8.06307	0.316562	0.311787	0.389058	0.30386	0.308981	0.316227	0.29466	0.314407	0.32326	0.338803	0.325318	0.296912	0.30667	0.339534	0.398686	0.324847	0.309321	0.297486	0.310846	0.339887	0.319826	0.374174	0.365733	0.334463	0.335254	0.32625	0.346374	0.317237	0.328591	0.323299	0.316274	0.296798	0.305395	0.305798	0.302798	0.34419	0.315872	0.323793	0.38141	0.345348	0.323973	0.324581	0.335223	0.340313	0.348548	0.302762	0.313899	0.323509
	8.09637	0.306642	0.312471	0.383717	0.323593	0.294912	0.319021	0.295171	0.304649	0.319636	0.324819	0.316356	0.315119	0.296339	0.337547	0.390036	0.329179	0.305855	0.315377	0.303533	0.330395	0.325057	0.354576	0.343529	0.300683	0.318264	0.317095	0.336846	0.32404	0.337153	0.331287	0.312788	0.310361	0.326532	0.30054	0.307307	0.343979	0.32357	0.330956	0.370388	0.336356	0.363134	0.330247	0.334141	0.332647	0.362125	0.306073	0.337245	0.315539
	8.12968	0.32117	0.310175	0.38892	0.32047	0.313466	0.320588	0.295988	0.303358	0.313808	0.318664	0.339566	0.309649	0.315755	0.360223	0.408723	0.344114	0.304694	0.309862	0.312809	0.341423	0.32283	0.351177	0.357717	0.326988	0.32112	0.329722	0.350664	0.320508	0.353605	0.310137	0.329633	0.298942	0.306365	0.307913	0.324881	0.339596	0.336047	0.328904	0.392401	0.352709	0.338482	0.329898	0.341704	0.344792	0.354366	0.308647	0.304292	0.325937
	8.16302	0.314013	0.311115	0.393999	0.310948	0.309573	0.312664	0.299912	0.29034	0.316563	0.326983	0.325934	0.325048	0.305068	0.344351	0.385018	0.332061	0.314287	0.308427	0.322043	0.323952	0.317166	0.365718	0.343877	0.319114	0.315065	0.312825	0.34609	0.321534	0.342318	0.349032	0.329985	0.319826	0.309373	0.295906	0.302468	0.351878	0.331335	0.318129	0.381471	0.339813	0.357379	0.328143	0.321245	0.336337	0.335982	0.29825	0.322462	0.317876
	8.19635	0.296847	0.30748	0.37518	0.320344	0.298443	0.320819	0.294202	0.322128	0.321411	0.323236	0.334909	0.315083	0.304396	0.358225	0.384715	0.339118	0.310041	0.310119	0.316012	0.335795	0.323668	0.354301	0.334798	0.327538	0.314264	0.319802	0.361777	0.333226	0.32994	0.323237	0.341147	0.304292	0.316121	0.306	0.31093	0.341475	0.328544	0.319935	0.375467	0.348446	0.322807	0.321056	0.329839	0.338232	0.349454	0.301291	0.330896	0.305045
	8.22968	0.318635	0.302879	0.380788	0.321462	0.321002	0.314346	0.294706	0.321773	0.315368	0.32319	0.333915	0.299378	0.307006	0.363164	0.39149	0.326256	0.296249	0.304793	0.315446	0.339761	0.322769	0.355088	0.324577	0.320384	0.312054	0.328032	0.348855	0.33776	0.337065	0.333719	0.310682	0.319028	0.311787	0.304197	0.327236	0.356824	0.325775	0.327239	0.396832	0.340311	0.321081	0.330302	0.330964	0.33542	0.35604	0.317417	0.334815	0.330665
	8.26303	0.309305	0.298564	0.387309	0.30799	0.30777	0.327152	0.293885	0.303269	0.326156	0.328411	0.330144	0.31111	0.310043	0.367753	0.379209	0.337916	0.31695	0.290421	0.327666	0.339198	0.337162	0.374525	0.324692	0.342848	0.312746	0.312372	0.357225	0.333689	0.345722	0.324303	0.323478	0.31762	0.313251	0.299374	0.333456	0.342642	0.331558	0.321957	0.384501	0.357873	0.35426	0.313224	0.322647	0.331971	0.343524	0.306298	0.348341	0.305539
	8.29633	0.310766	0.310799	0.375494	0.309509	0.322143	0.317781	0.295712	0.314778	0.317958	0.323669	0.327858	0.303696	0.302128	0.352958	0.392751	0.343649	0.313861	0.310186	0.320543	0.332164	0.318917	0.355917	0.337042	0.329568	0.322394	0.31927	0.356211	0.34425	0.344936	0.336091	0.291005	0.329554	0.318117	0.311541	0.330087	0.346801	0.324193	0.313735	0.386776	0.332825	0.352379	0.325192	0.316918	0.344753	0.351047	0.310537	0.327524	0.296932
	8.32963	0.298723	0.313704	0.381906	0.305915	0.30449	0.316507	0.298196	0.307897	0.319228	0.320433	0.332173	0.311558	0.302298	0.336217	0.381135	0.346694	0.316678	0.307205	0.331418	0.342622	0.318312	0.374751	0.336221	0.325385	0.310938	0.318064	0.353253	0.326714	0.339858	0.352125	0.325261	0.322382	0.306028	0.30756	0.299463	0.352541	0.316317	0.325131	0.37415	0.344881	0.344414	0.330887	0.329785	0.358667	0.341839	0.306923	0.343633	0.335675
	8.36302	0.316175	0.316652	0.389211	0.319068	0.304104	0.310625	0.303548	0.329069	0.32212	0.332729	0.331038	0.305324	0.298791	0.343848	0.378257	0.340154	0.307003	0.30697	0.305171	0.333876	0.312907	0.360771	0.344022	0.344578	0.310089	0.323116	0.340804	0.323604	0.317434	0.322914	0.315753	0.307191	0.303879	0.305278	0.297591	0.345976	0.325271	0.311104	0.388046	0.34189	0.329276	0.323474	0.321465	0.34958	0.335037	0.301986	0.334655	0.314835
	8.39638	0.311263	0.313081	0.382622	0.331947	0.313411	0.320544	0.282592	0.313585	0.31727	0.314512	0.324094	0.315771	0.30466	0.361187	0.387617	0.318312	0.321261	0.311665	0.30802	0.32914	0.326279	0.360961	0.325155	0.331145	0.31849	0.313818	0.366228	0.324653	0.336844	0.302286	0.328899	0.318556	0.292341	0.296067	0.310166	0.348923	0.322753	0.309843	0.38394	0.326555	0.341093	0.341399	0.327792	0.355188	0.344955	0.308015	0.329975	0.32739
	8.42968	0.302726	0.305238	0.381184	0.314044	0.312195	0.317391	0.29096	0.314614	0.330504	0.326637	0.320504	0.309539	0.311414	0.350425	0.387139	0.312748	0.318452	0.304642	0.316863	0.333749	0.334703	0.35473	0.325171	0.319215	0.320038	0.327583	0.346893	0.310922	0.340834	0.337206	0.333447	0.306924	0.307501	0.295467	0.30478	0.346535	0.328842	0.318524	0.390371	0.355728	0.315115	0.321379	0.32106	0.337614	0.375941	0.298038	0.34088	0.304493
	8.463	0.331082	0.314033	0.385296	0.327195	0.330041	0.31403	0.300872	0.297402	0.326766	0.363592	0.334429	0.31711	0.301373	0.356395	0.396863	0.320113	0.31596	0.306644	0.326859	0.321798	0.303491	0.3618	0.343895	0.325706	0.32211	0.323187	0.343192	0.329849	0.328745	0.335802	0.312615	0.315668	0.319528	0.300387	0.316281	0.340294	0.330252	0.319912	0.399691	0.337236	0.341325	0.332436	0.335154	0.331629	0.356826	0.303606	0.324082	0.321265
	8.49635	0.312355	0.306206	0.380637	0.33536	0.315506	0.31055	0.299088	0.319924	0.325186	0.335731	0.322308	0.32084	0.322248	0.341424	0.417371	0.323133	0.303058	0.315119	0.329768	0.33581	0.319247	0.367142	0.349544	0.312351	0.327437	0.318491	0.350684	0.333901	0.331382	0.343477	0.30594	0.315434	0.323489	0.295845	0.32028	0.344279	0.349298	0.32815	0.388963	0.35174	0.322229	0.320714	0.331245	0.321669	0.349296	0.307814	0.346898	0.337796
	8.5297	0.312798	0.310526	0.38934	0.32646	0.31926	0.310183	0.308658	0.313895	0.313093	0.322212	0.329716	0.301369	0.319137	0.358457	0.38099	0.342184	0.306799	0.296063	0.335431	0.334195	0.309217	0.385998	0.342734	0.327846	0.323012	0.329724	0.346266	0.331837	0.331231	0.327318	0.339222	0.320181	0.301547	0.31068	0.33457	0.343628	0.311743	0.305869	0.378371	0.343033	0.329816	0.328498	0.318041	0.328319	0.347367	0.304684	0.326665	0.319561
	8.563	0.323676	0.313035	0.374541	0.318556	0.31736	0.314281	0.294487	0.307367	0.314292	0.330007	0.32074	0.308677	0.321121	0.361626	0.403873	0.338358	0.303639	0.311979	0.314976	0.331235	0.318753	0.370484	0.32313	0.305463	0.317872	0.330681	0.338761	0.326108	0.34437	0.33192	0.325566	0.309719	0.319168	0.302636	0.321513	0.352543	0.324895	0.32051	0.383995	0.338266	0.320058	0.335496	0.321398	0.315107	0.358649	0.31459	0.315761	0.30512
	8.59633	0.319813	0.315955	0.384379	0.331622	0.31303	0.318109	0.293123	0.320565	0.317252	0.324504	0.328054	0.301526	0.313024	0.353184	0.399217	0.32911	0.306086	0.304635	0.31903	0.337058	0.31711	0.365797	0.344748	0.335174	0.320074	0.324177	0.348929	0.31593	0.339991	0.332505	0.337841	0.319537	0.291878	0.307883	0.310543	0.346777	0.328249	0.325589	0.397661	0.354102	0.332183	0.319956	0.336817	0.352932	0.341359	0.31455	0.32888	0.306222
	8.6297	0.312931	0.302215	0.382285	0.316105	0.310617	0.31765	0.31502	0.32137	0.326537	0.329631	0.331352	0.315047	0.320851	0.362008	0.369564	0.327565	0.305324	0.314538	0.314564	0.3428	0.336779	0.364683	0.338599	0.333542	0.309321	0.336936	0.349133	0.331446	0.341358	0.341218	0.335101	0.308823	0.319909	0.316611	0.326662	0.347731	0.343256	0.3171	0.388499	0.328974	0.34523	0.336703	0.332273	0.357551	0.3422	0.304682	0.322914	0.322424
	8.66295	0.305961	0.309999	0.373315	0.317951	0.304135	0.312053	0.290829	0.312834	0.317421	0.32217	0.326504	0.331084	0.321764	0.341058	0.384537	0.335381	0.301081	0.307393	0.334201	0.334233	0.322343	0.383458	0.337724	0.315013	0.310869	0.317187	0.33911	0.330839	0.343354	0.327958	0.332914	0.301772	0.317718	0.309597	0.324559	0.357635	0.325614	0.321658	0.380426	0.337258	0.339783	0.335049	0.332995	0.33675	0.348794	0.300409	0.322279	0.315281
	8.69637	0.319416	0.308114	0.380221	0.331643	0.312074	0.318279	0.298675	0.312214	0.322274	0.353671	0.328164	0.296617	0.30942	0.355139	0.370211	0.327375	0.311099	0.32021	0.333451	0.337959	0.315922	0.361628	0.342024	0.336943	0.314327	0.313366	0.357343	0.336679	0.335518	0.336107	0.345392	0.305195	0.307986	0.304222	0.323474	0.344481	0.325734	0.314719	0.385439	0.353367	0.330606	0.323021	0.324783	0.331637	0.354274	0.300489	0.340627	0.317239
	8.72968	0.312678	0.307958	0.375677	0.332445	0.31348	0.314054	0.280513	0.316522	0.325728	0.318268	0.331497	0.303478	0.316453	0.350652	0.404876	0.327093	0.308514	0.293797	0.318614	0.336889	0.318169	0.364055	0.349823	0.335569	0.307149	0.310921	0.342869	0.336294	0.334158	0.345629	0.33451	0.308024	0.319787	0.313768	0.306146	0.334394	0.333667	0.320117	0.384198	0.341105	0.330439	0.324882	0.33449	0.352492	0.325576	0.302712	0.348764	0.31375
	8.763	0.320035	0.317138	0.391967	0.314661	0.309996	0.31262	0.305361	0.298297	0.318085	0.333804	0.318253	0.316927	0.316451	0.330253	0.373765	0.338683	0.29891	0.30701	0.319479	0.335369	0.312678	0.38328	0.317859	0.306627	0.310561	0.328837	0.346067	0.327654	0.337119	0.344844	0.314418	0.317962	0.312369	0.29832	0.299606	0.343202	0.317155	0.310884	0.389497	0.36157	0.311175	0.330517	0.321164	0.346785	0.342855	0.305192	0.342993	0.324763
	8.79633	0.318616	0.303855	0.384683	0.329688	0.302342	0.318565	0.311645	0.306314	0.314532	0.327595	0.323476	0.310942	0.314093	0.346323	0.375269	0.350347	0.310339	0.301204	0.313374	0.330931	0.300014	0.368323	0.325533	0.345896	0.318688	0.319295	0.362156	0.334599	0.339938	0.333224	0.318608	0.295266	0.30918	0.301976	0.304608	0.342373	0.332016	0.317914	0.381655	0.350954	0.342471	0.330351	0.326535	0.342369	0.348311	0.305989	0.331163	0.318145
	8.8297	0.310477	0.320801	0.380613	0.324311	0.302758	0.32138	0.305423	0.315428	0.328162	0.337914	0.330364	0.310785	0.311483	0.330384	0.402838	0.359309	0.319151	0.306343	0.345871	0.339033	0.322102	0.378522	0.339801	0.339637	0.309237	0.323994	0.36055	0.340774	0.338761	0.321555	0.31909	0.326891	0.316725	0.321631	0.2989	0.340614	0.315247	0.32139	0.37031	0.33752	0.334911	0.332233	0.338003	0.328748	0.352291	0.302861	0.339522	0.32493
	8.86302	0.331463	0.298609	0.380505	0.322265	0.310633	0.314451	0.295256	0.323066	0.325641	0.330231	0.317709	0.294418	0.330839	0.356269	0.396373	0.332779	0.311339	0.30384	0.318894	0.338896	0.320232	0.351693	0.335885	0.330876	0.31625	0.325034	0.349049	0.343434	0.330622	0.330141	0.324651	0.299381	0.323268	0.304843	0.302778	0.345023	0.309053	0.325942	0.387686	0.326327	0.327395	0.33014	0.344883	0.327633	0.352329	0.313056	0.334785	0.337715
[truncated: 606 more rows]
[truncated: 700 more columns]
