# Supplementary material for: Orai3 and Orai1 mediate CRAC channel function and metabolic reprogramming in B cells
Source: eLife. 2023 Feb 21;12:e84708. doi: 10.7554/eLife.84708 (PMC9998091; doi:10.7554/eLife.84708)
Supplement: Figure 6—source data 1. [file elife-84708-fig6-data1.xlsx]

## Sheet: Sheet1
Figure 6C
	Mb1cre/+	Orai1fl/flMb1cre/+
	0.8278	0.6043
	0.9237	0.5375
	0.8191	0.6872
Figure 6D
Figure 6E
	Mb1cre/+	Orai1fl/fl Mb1cre/+
	100	71.8382
	100	70.7516
	100	39.2308
	100	43.7262
Figure 6F
Figure 6G
	Mb1cre/+	Orai1fl/flMb1cre/+
	100	16.2338
	100	19.6601
	100	30.2913
