# Supplementary material for: Orai3 and Orai1 mediate CRAC channel function and metabolic reprogramming in B cells
Source: eLife. 2023 Feb 21;12:e84708. doi: 10.7554/eLife.84708 (PMC9998091; doi:10.7554/eLife.84708)
Supplement: Figure 7—figure supplement 1—source data 1. [file elife-84708-fig7-figsupp1-data1.xlsx]

## Sheet: Sheet1
Figure 7 - Figure Supplement 1A
		Wild type			Orai2-/-
	Unstimulated	5.86	7.21	6.43	7.45	7.72	5.81
	2.5 IgM	36	34.7	35.9	48.8	42.9	50.8
	5 IgM	61	58.5	59.3	67.8	61.8	73.2
	10 IgM	74.7	74.8	73.8	80	77.9	84.7
	20 IgM	83.2	85.4	83.1	85.5	84.5	89
	CD40	12.5	12.9	12.7	7.56	8.07	8.87
	IgM/CD40	90	87.4	89.3	87.6	85.7	90.4
	LPS	86.9	87	87	87	85.7	88.5
Figure 7 - Figure Supplement 1B
		Wild type			Orai2-/-
	Unstimulated	16	12.1	13.8	11.2	10.9	10.7
	2.5 IgM	4.19	3.13	4.13	4.39	3.53	2.95
	5 IgM	8.04	5.92	6.35	8.73	6.37	6.84
	10 IgM	11.3	11.4	10.5	15.3	13	12.2
	20 IgM	21.2	19.2	18.7	26.2	20.2	18.8
	CD40	46.2	44.5	45.9	39.8	43.3	40
	IgM/CD40	52.7	50.7	49.8	49.9	47.4	43.3
	LPS	43.7	39.8	40	49.3	45.9	45.4
