# Supplementary material for: Orai3 and Orai1 mediate CRAC channel function and metabolic reprogramming in B cells
Source: eLife. 2023 Feb 21;12:e84708. doi: 10.7554/eLife.84708 (PMC9998091; doi:10.7554/eLife.84708)
Supplement: Figure 7—source data 1. [file elife-84708-fig7-data1.xlsx]

## Sheet: Sheet1
Figure 7B
		Mb1cre/+										Orai1fl/flMb1cre/+										Orai3fl/fl Mb1cre/+										Orai1/Orai3fl/fl Mb1cre/+
	Unstimulated	0.38	1.24	0.08	0.02	0.09	0.36	0.89	0.6	1.52		0.89	1.65	0.24	0.17	0.49	0.59	0.5	0.57			0.48	0.31	0.33	0.88							2.05	3.12	3.14	4.56
	IgM	93.2	92.1	76.1	87.1	80.3	90.1	87.1	92.3	91.1		82.7	90.4	69.3	73.8	84.4	87.3	88.4	88.7			89.2	86.7	91.5	93.6							67.1	62.3	64.9	48.9
	CD40	10	8.6	8.41	7.33	4.88	6.12	12.4	11.7	17.7		10.6	6.93	5.34	4.93	6.2	7.27	6.88	9.77			6.63	5.34	6.95	20							4.65	6.77	6.19	7.46
	IgM/CD40	93.6	92.3	86.5	91.6	81.4	90.7	89.5	94.9	87.9		90.8	93.3	82.9	79.4	89.2	90.3	90.6	91.2			92.6	86.9	91.9	92.7							73.5	70.4	72	86.8
	LPS	88.6	85	90	86.5	73.2	78.7	81.3	86.9	86.1		85.7	82.6	87.9	71.2	77.2	79.1	82.7	87.7			83.4	81.2	86	89.8							78	80.7	79	76.4
Figure 7C
		Mb1cre/+										Orai1fl/flMb1cre/+										Orai3fl/fl Mb1cre/+										Orai1/Orai3fl/fl Mb1cre/+
	Unstimulated	7.11	6.57	11.5	24.1	20.9	21.2	11.9	10.2	25		7.95	6.42	18	15.7	15.9	13.4	11.1	24			21.5	18.8	16.8	23.6							16.1	16.9	16.4	12.5
	IgM	20.3	16.8	22.6	30.7	33.8	34.5	24.3	32.4	42.3		11.1	12.6	16.5	18.4	18.9	22.6	25.9	41.5			31	28.7	35.3	44.1							11.6	9.45	10.9	8.06
	CD40	36.1	24.9	43.8	40	52.3	53.4	31.8	27.8	39.6		26.6	24.4	25.5	38.3	39.7	35.5	26.9	36.7			51	43.7	37.4	39.6							51.5	44.4	47.4	22.5
	IgM/CD40	62.3	60.7	69.8	73.4	71.3	72.5	57	65.8	73.8		36.5	53.4	58.2	55.6	56.8	62.2	67.8	76.2			71.2	77.5	76.8	78.2							37.6	27.7	33.7	46.5
	LPS	34	28.3	39.6	40.9	48.9	49.7	36.7	48.7	43.2		31.8	33.9	42.3	37	37.8	38.4	42.6	56.5			50.2	38.1	50.1	46.6							42.1	48.5	45.8	31.9
Figure 7D
	Pathway	ES	NES	p-value	FDR
	E2F Targets	0.539	8.454	<0.001	<0.001
	G2M Checkpoint	0.38	5.809	<0.001	<0.001
	Cell Cycle	0.302	3.711	<0.001	<0.001
	Mitotic Spindle	0.232	3.61	<0.001	<0.001
	Myc Targets V1	0.149	2.312	0.004	0.003
