# Supplementary material for: Orai3 and Orai1 mediate CRAC channel function and metabolic reprogramming in B cells
Source: eLife. 2023 Feb 21;12:e84708. doi: 10.7554/eLife.84708 (PMC9998091; doi:10.7554/eLife.84708)
Supplement: Figure 8—figure supplement 1—source data 1. [file elife-84708-fig8-figsupp1-data1.xlsx]

## Sheet: Sheet1
Figure 8 - Figure Supplement 1A
Figure 8 - Figure Supplement 1B
Figure 8 - Figure Supplement 1C
											GAPDH
Figure 8 - Figure Supplement 1D
											GAPDH
