# Supplementary material for: Orai3 and Orai1 mediate CRAC channel function and metabolic reprogramming in B cells
Source: eLife. 2023 Feb 21;12:e84708. doi: 10.7554/eLife.84708 (PMC9998091; doi:10.7554/eLife.84708)
Supplement: Figure 8—source data 1. [file elife-84708-fig8-data1.xlsx]

## Sheet: Sheet1
Figure 8-Source Data 1A_ Mb1-Cre/+ vs Orai1fl/fl Mb1-Cre/+ ; 24hr anti-IgM
	Pathway	ES	NES	p-value	FDR
	E2F Targets	-0.243	-1.078	0.296	0.646
	G2M Checkpoint	-0.174	-0.808	0.921	0.983
	Cell Cycle	0.132	1.612	0.037	0.171
	Mitotic Spindle	0.192	0.949	0.598	0.636
	Pathway	ES	NES	p-value	FDR
	Glycolysis	0.178	2.491	<0.001	<0.001
	OX PHOS	-0.092	-1.097	0.326	1
Figure 8-Source Data 1B_Mb1-Cre/+ vs Orai1/Orai3fl/fl Mb1-Cre/+ ; 24hr anti-IgM
	Pathway	ES	NES	p-value	FDR
	E2F Targets	0.539	8.454	<0.001	<0.001
	G2M Checkpoint	0.38	5.809	<0.001	<0.001
	Cell Cycle	0.302	3.711	<0.001	<0.001
	Mitotic Spindle	0.232	3.61	<0.001	<0.001
	Myc Targets V1	0.149	2.312	0.004	0.003
	Pathway	ES	NES	p-value	FDR
	Glycolysis	0.141	2.028	0.004	0.009
	OX PHOS	0.144	2.341	<0.001	0.003
