# Supplementary material for: Orai3 and Orai1 mediate CRAC channel function and metabolic reprogramming in B cells
Source: eLife. 2023 Feb 21;12:e84708. doi: 10.7554/eLife.84708 (PMC9998091; doi:10.7554/eLife.84708)
Supplement: Figure 8—source data 2. [file elife-84708-fig8-data2.xlsx]

## Sheet: Sheet1
Figure 8C
	Naive	24hr IgM
	4	11
	11	13
	7	14
	6	10
	6	12
	5	5
	6	18
	5	15
	6	16
	4	7
	6	12
	5	10
	6	13
	2	14
	8	15
	9	14
	4	10
	4	13
	5	11
	7	14
	4	13
	5	14
	6	18
	3	10
	5	4
Figure 8D
		Mb1cre/+			Orai1fl/fl Mb1cre/+
	Unstimulated	3201	3122	3163	3149	3107	3203
	IgM	8700	8259	8241	7521	7395	8039
	CD40	3820	3715	3788	3792	3738	3899
	IgM/CD40	9177	8698	8871	8128	7964	8491
	LPS	7657	7538	7434	7162	7214	7670
Figure 8E
		ECAR		OCR
	WT	50.26	2.27	672.43	36.85
	Orai1 KO	31.32	1.12	423.94	22.25
	Orai3 KO	41.35	2.57	620.15	39.42
	O1/O3 DKO	20.81	2.4	217.82	38.2
Figure 8F
	Time (minutes)	Mb1cre/+								Orai1fl/fl Mb1cre/+								Orai3fl/fl Mb1cre/+								Orai1/Orai3fl/flMb1cre/+
	1.38048	297.431	256.7	290.903	285.998					154.649	179.328	181.06	165.113					247.416	212.922	260.288	259.166					215.642	231.241	125.551	230.046	167.715	134.008	160.423	144.387
	9.89215	288.489	248.627	281.315	277.49					151.288	168.034	175.211	158.206					240.439	203.887	255.228	251.919					241.171	226.666	121.928	220.097	158.146	130.498	151.329	136.786
	18.4068	286.644	245.948	277.48	275.9					148.151	168.827	173.931	157.315					239.094	206.793	254.464	251.262					231.445	226.779	119.447	216.905	155.163	133.272	147.578	133.469
	27.0205	103.44	88.8156	97.0197	98.9243					55.5351	63.3499	68.5901	58.5578					93.2501	18.2651	82.5578	99.3556					55.6812	82.2344	61.2094	64.8431	55.9523	108.442	51.0396	54.0437
	35.5327	145.555	129.236	139.966	141.545					97.3356	101.798	107.953	97.2148					134.738	61.0302	120.157	138.463					86.6667	118.7	101.878	106.709	93.1132	15.0836	89.8189	92.9741
	44.0344	142.721	125.903	137.4	138.466					91.8272	95.0237	102.233	91.8226					130.188	63.6663	118.576	129.097					85.8362	111.195	87.8428	97.1206	83.843	46.646	81.2197	84.048
	52.6478	626.666	507.026	585.662	469.161					322.531	365.564	414.605	376.602					596.854	613.32	522.552	460.517					367.085	339.361	176.211	185.619	183.912	99.4478	256.822	159.631
	61.374	726.266	603.684	702.491	547.225					343.943	397.192	452.536	397.119					629.636	659.231	560.939	495.424					410.858	373.119	192.314	211.064	205.945	113.484	279.889	175.896
	69.8867	745.249	624.68	724.705	595.093					370.526	420.758	479.4	425.084					658.51	707.103	587.132	527.836					458.834	404.467	203.589	238.794	234.74	127.867	311.18	197.48
	78.4982	67.2342	61.2685	63.5226	68.7399					59.2468	66.5631	64.2256	57.604					83.3868	4.36784	81.8835	83.8765					32.055	76.706	77.9042	74.7025	62.239	30.7059	53.7733	52.6024
	87.0081	74.6769	66.9003	72.8083	76.529					63.025	69.1567	68.8995	61.1642					89.2943	13.0053	84.3055	86.5901					41.5463	80.2901	71.9524	73.5468	64.1098	29.7861	55.9943	54.6647
	95.5236	74.0828	66.8504	72.393	76.5424					62.4776	68.0711	68.3467	59.8821					87.4913	9.68197	80.5721	86.3759					38.7327	79.3224	68.5896	71.2532	62.8679	28.6667	58.0812	52.6512
Figure 8G
	Mb1cre/+	Orai1fl/fl Mb1cre/+	Orai3fl/fl Mb1cre/+	Orai1/Orai3fl/flMb1cre/+
	212.561	85.6736	151.603	92.2949
	179.098	100.756	197.111	104.605
	205.087	105.584	173.892	89.4965
	199.358	97.4329	164.886	80.8173
Figure 8H
	Mb1cre/+	Orai1fl/fl Mb1cre/+	Orai3fl/fl Mb1cre/+	Orai1/Orai3fl/flMb1cre/+
	671.166	308.048	571.018	171.872
	557.83	352.687	697.421	99.2007
	652.312	411.053	506.56	253.099
	518.55	365.202	441.46	144.829
