# Supplementary material for: Orai3 and Orai1 mediate CRAC channel function and metabolic reprogramming in B cells
Source: eLife. 2023 Feb 21;12:e84708. doi: 10.7554/eLife.84708 (PMC9998091; doi:10.7554/eLife.84708)
Supplement: Figure 9—figure supplement 1—source data 1. [file elife-84708-fig9-figsupp1-data1.xlsx]

## Sheet: Sheet1
Figure 9 - Figure Supplement 1A
		Metabolite	Formula	Ion Type	mz	ppm	RT	RT_range	Detection	Skeleton_Metabolite	WT1 NS	WT1 IgM	WT1 Both	WT1 FK506	WT1 GSK	WT2 NS	WT2 IgM	WT2 Both	WT2 FK506	WT2 GSK	WT3 NS	WT3 IgM	WT3 Both	WT3 FK506	WT3 GSK	KO1 NS	KO1 IgM	KO1 Both	KO1 FK506	KO1 GSK	KO2 NS	KO2 IgM	KO2 Both	KO2 FK506	KO2 GSK	KO3 NS	KO3 IgM	KO3 Both	KO3 FK506	KO3 GSK	KOBoth_vs_KOFK506_ttest_pval	KOBoth_vs_KOFK506_Log2FoldChange	KOBoth_vs_KOFK506_impact_score	KOBoth_vs_KOGSK_ttest_pval	KOBoth_vs_KOGSK_Log2FoldChange	KOBoth_vs_KOGSK_impact_score	KOBoth_vs_KOIgM_ttest_pval	KOBoth_vs_KOIgM_Log2FoldChange	KOBoth_vs_KOIgM_impact_score
	0	1 1-Methylnicotinamide	C7H8N2O	[M+H]+	137.071	-0.3	20.76	0.49	0	1-Methylnicotinamide	-	-	-	-	-	-	-	-	-	-	-	-	-	-	-	-	-	-	-	-	-	-	-	-	-	-	-	-	-	-	NA	0	0	NA	0	0	NA	0	0
	1	2 2,3-Diphosphoglyceric acid	C3H8O10P2	[M-H]-	264.952	0	12.99	0	0	2,3-Diphosphoglyceric acid	-	-	-	-	-	-	-	-	-	-	-	-	-	-	-	-	-	-	-	-	-	-	-	-	-	-	-	-	-	-	NA	0	0	NA	0	0	NA	0	0
	2	3 3-Hydroxybutyric acid	C4H8O3	[M-H]-	103.04	-10.4	6.07	0.17	0	3-Hydroxybutyric acid	-	-	-	-	-	-	-	-	-	-	-	-	-	-	-	-	-	-	-	-	-	-	-	-	-	-	-	-	-	-	NA	0	0	NA	0	0	NA	0	0
	3	4 3-Phosphoglyceric acid	C3H7O7P	[M-H]-	184.986	-4.1	13.76	0.41	4	3-Phosphoglyceric acid	-	25557	79384	-	-	-	-	-	-	-	-	-	21637	16552	-	-	-	-	-	-	-	-	-	-	-	-	-	-	-	-	NA	0	0	NA	0	0	NA	0	0
	4	5 4,5-Dihydroorotic acid	C5H6N2O4	[M-H]-	157.025	-6.9	8.59	0.34	19	4,5-Dihydroorotic acid	-	176153	1717312	19789	31584	-	35339	561759	-	15776	-	42597	1538214	21083	-	-	17766	85092	-	-	-	56194	131421	15604	21403	-	34980	353486	-	25997	0.101466	3.71327	13	0.110289	3.21637	9	0.139766	2.38743	4
	5	6 4-Hydroxyproline	C5H9NO3	[M+H]+	132.065	3.6	10.67	0.3	30	4-Hydroxyproline	35382136	94213568	169859824	45247876	62222568	30858656	90345704	129113000	34955832	53692520	30514952	95260488	114055168	34781744	49891484	26528282	47997052	89064688	29386774	30386818	26249112	63231388	122930024	34263528	36190588	28889746	61309496	124745416	28021584	38722692	0.00225368	1.87708	116379	0.00288421	1.67713	81686	0.0120589	0.964722	13737
	6	7 5'-Methylthioadenosine	C11H15N5O3S	[M+H]+	298.097	-2.5	4.18	0.2	27	5'-Methylthioadenosine	286442	1645664	4130317	317572	521289	261212	1056889	1982220	245649	288096	256283	1703918	2470775	251312	383910	-	328601	703220	168054	-	317396	860976	3423330	195602	223214	281360	772839	2044387	-	332476	0.0745044	3.5666	177	0.0818513	3.11378	121	0.155303	1.65286	27
	7	8 5-Phosphoribosylamine	C5H12NO7P	[M-H]-	228.028	-2.5	11.62	0	0	5-Phosphoribosylamine	-	-	-	-	-	-	-	-	-	-	-	-	-	-	-	-	-	-	-	-	-	-	-	-	-	-	-	-	-	-	NA	0	0	NA	0	0	NA	0	0
	8	9 6-Phosphogluconic acid	C6H13O10P	[M-H]-	275.017	3.8	14.66	0.23	0	6-Phosphogluconic acid	-	-	-	-	-	-	-	-	-	-	-	-	-	-	-	-	-	-	-	-	-	-	-	-	-	-	-	-	-	-	NA	0	0	NA	0	0	NA	0	0
	9	10 Acetoacetic acid	C4H6O3	[M-H]-	101.024	-11.1	9.57	0.46	30	Acetoacetic acid	429622	215488	356886	215425	144127	342543	189239	241908	181182	123073	317929	201100	241083	158717	111590	272435	119423	193542	139590	85984	353174	173221	278922	196312	109505	454721	196871	295203	183118	131117	0.0820478	0.56469	4	0.0125485	1.23293	34	0.0760758	0.649128	4
	10	11 Acetyl-CoA	C23H38N7O17P3S	[M+H]+	810.133	-8.1	9.56	0.44	3	Acetyl-CoA	-	-	27943	-	-	-	10610	-	-	-	-	-	31889	-	-	-	-	-	-	-	-	-	-	-	-	-	-	-	-	-	NA	0	0	NA	0	0	NA	0	0
	11	12 Acetylcysteine	C5H9NO3S	[M+H]+	164.038	-0.6	7.2	0.28	30	Acetylcysteine	70621	85404	120082	49058	37750	112498	72964	148033	35133	17331	83484	98935	227261	44291	24966	27007	29666	80644	18056	11837	225854	115933	369819	73322	36515	312415	121998	334628	70658	39086	0.0889509	2.27655	9	0.0638912	3.16653	20	0.146297	1.5528	4
	12	13 Adenine	C5H5N5	[M+H]+	136.062	-1.3	6.15	0.13	30	Adenine	24043622	26811068	46131828	20606042	19637622	25507352	32900122	40154232	20449594	25563658	28349566	41221736	44624096	17325788	21787896	29414508	19281554	35004848	20186568	15080695	24661718	24383152	39725748	19214162	15095135	28670470	25772112	50712872	20037388	21948498	0.0091829	1.07758	7082	0.00921434	1.26701	7730	0.0209515	0.853265	2801
	13	14 Adenosine	C10H13N5O4	[M+H]+	268.104	-2.7	5.81	0.2	30	Adenosine	43731632	47167076	58138084	32230046	29607466	28208536	61802288	73587744	32043432	32499216	35215176	64877084	67081708	22559110	37770340	29775098	33820488	67786016	27886660	32834112	41342504	37996820	64131832	36744000	23214348	41321592	41477344	81441632	25452666	25409374	0.00283023	1.24395	42323	0.0018669	1.38916	68938	0.00429211	0.913206	23887
	14	15 Adenosine diphosphate ribose	C15H23N5O14P2	[M-H]-	558.064	1.6	11.73	0.09	30	Adenosine diphosphate ribose	530812	462185	1054224	351202	434271	486881	522087	596982	309786	345542	694539	694680	550175	418643	226398	250219	141411	429119	194079	200125	558522	435113	804984	265972	200481	526955	365218	963238	157033	222170	0.0310871	1.83222	54	0.0296523	1.81897	56	0.082375	1.22235	15
	15	16 Adenosine monophosphate	C10H14N5O7P	[M+H]+	348.07	-2.5	10.73	0.28	30	Adenosine monophosphate	9222990	17438130	27342494	10485212	8894065	11937555	12230496	15872592	10408529	9625090	13219836	16324308	19262602	10756226	9261627	7726366	8583584	10919575	5914044	5645501	14041337	13165397	14795735	7935706	6367872	12661946	12190543	25160636	6666503	11080355	0.0778286	1.31022	379	0.113225	1.13948	240	0.275524	0.584017	77
	16	17 Adenosine triphosphate	C10H16N5O13P3	[M-H]-	505.988	0.8	13.3	0.35	5	Adenosine triphosphate	-	22535	182302	20058	-	-	-	-	-	-	-	-	27375	-	-	-	-	-	-	-	-	-	41338	-	-	-	-	-	-	-	0.373901	0.561834	0	0.373901	0.561834	0	0.373901	0.561834	0
	17	18 Adenylsuccinic acid	C14H18N5O11P	[M-H]-	462.067	0.7	15.1	0	0	Adenylsuccinic acid	-	-	-	-	-	-	-	-	-	-	-	-	-	-	-	-	-	-	-	-	-	-	-	-	-	-	-	-	-	-	NA	0	0	NA	0	0	NA	0	0
	18	19 ADP	C10H15N5O10P2	[M-H]-	426.022	0.4	11.94	0.46	17	ADP	-	61392	535610	30037	27258	34448	-	36093	32755	-	-	29695	92295	31376	-	-	-	29917	-	-	38083	34443	122220	-	-	26530	-	71384	-	48063	0.140426	1.54513	1	0.209124	1.17309	1	0.161865	1.38633	1
	19	20 Allantoin	C4H6N4O3	[M-H]-	157.037	-6.5	10.4	0.26	30	Allantoin	425646	439870	879160	436886	275888	333854	463767	399457	431723	368256	405528	513170	641664	482510	201390	514268	251045	461669	255637	158653	393229	384701	640207	303190	247059	433603	304839	724391	252758	375022	0.0129233	1.17008	77	0.0250111	1.22599	41	0.0270906	0.957267	33
	20	21 Aminoadipic acid	C6H11NO4	[M-H]-	160.061	-6.5	7.26	0.15	30	Aminoadipic acid	206456	265007	454988	171693	150099	210496	200901	317132	139923	107712	194436	242257	332135	135383	114904	138753	127390	191807	107857	103980	187869	178619	330301	131838	95842	205385	185973	328756	121299	103395	0.0245199	1.23695	19	0.016541	1.48858	33	0.0729009	0.790323	5
	21	22 Argininosuccinic acid	C10H18N4O6	[M-H]-	289.115	-0.6	13.37	0.1	20	Argininosuccinic acid	13724	50037	160664	20080	23211	13124	27584	80927	16683	-	-	35483	85573	14557	12622	-	-	25568	-	-	13404	23361	91276	-	-	-	19911	63381	-	16790	0.061481	2.44972	3	0.0694248	2.2163	2	0.0963525	1.73161	1
	22	23 Beta-Alanine	C3H7NO2	[M+H]+	90.055	6	10.22	0.15	29	Beta-Alanine	266868	699153	1495918	422942	740642	161476	840878	1238035	303440	601197	163125	896678	1083256	282795	558193	-	326717	659893	249700	339020	192926	583382	1203730	307055	372359	195324	462696	1071910	279367	415836	0.0131489	1.81184	168	0.0218354	1.38086	81	0.0442342	1.09651	35
	23	24 Betaine	C5H11NO2	[M+H]+	118.086	2.1	7.82	0.09	30	Betaine	97885888	75313024	136101856	58995720	44698884	66046132	69174448	92815208	41935948	34894248	75662768	80137064	96229928	41427808	35882036	46655152	36150136	58357216	32784878	24115676	90202760	68798984	111953360	61762192	37890504	188974992	94607608	153833904	87411448	61216860	0.210588	0.833027	714	0.0869895	1.39536	2255	0.269134	0.699838	527
	24	25 Butyrylcarnitine	C11H21NO4	[M+H]+	232.154	-1.4	5.6	0.45	30	Butyrylcarnitine	3632702	3559095	7556898	2001836	1517084	2669639	2931355	5174206	1534176	1094848	2270214	2879622	4772499	1194988	957292	1586422	1326223	2885592	1132763	645645	1996341	1812064	4876833	1335396	707271	2222913	1886533	4804417	1050094	672048	0.0101268	1.83669	946	0.00574028	2.63365	2629	0.0204212	1.32248	359
	25	26 Carbamoyl phosphate	CH4NO5P	[M-H]-	139.975	-6.7	27.14	0.35	0	Carbamoyl phosphate	-	-	-	-	-	-	-	-	-	-	-	-	-	-	-	-	-	-	-	-	-	-	-	-	-	-	-	-	-	-	NA	0	0	NA	0	0	NA	0	0
	26	27 Carnosine	C9H14N4O3	[M+H]+	227.114	-1.6	11.62	0.16	29	Carnosine	142482	70596	-	173318	94628	89570	88839	62056	89788	63857	92065	119944	80621	118123	57060	68946	57234	70624	55443	97137	107290	94313	81639	98290	70507	113187	71419	95344	72253	63506	0.642329	0.131819	0	0.683273	0.0992227	0	0.560483	0.151228	0
	27	28 CDP	C9H15N3O11P2	[M+H]+	404.026	-1.1	13.8	0.23	1	CDP	-	-	29905	-	-	-	-	-	-	-	-	-	-	-	-	-	-	-	-	-	-	-	-	-	-	-	-	-	-	-	NA	0	0	NA	0	0	NA	0	0
	28	29 Choline	C5H14NO	[Cat]+	104.107	2	12.79	0.19	30	Choline	140213072	65341700	96056392	66896632	55507172	88197888	137643984	184779936	56774512	70668096	97574600	132707872	95998408	51758176	59128064	99090160	52242876	133629912	53724220	47854004	102539520	77870736	156996224	62815904	51728364	118606040	83694288	153245168	56770340	60116204	0.000307285	1.35678	857340	0.000305529	1.47479	915125	0.00314978	1.05383	72246
	29	30 cis-Aconitic acid	C6H6O6	[M-H]-	173.009	-5.6	14.84	0.11	30	cis-Aconitic acid	920001	2839788	4722035	1705254	1373133	1256946	1801594	2660146	776976	304007	1034683	2416500	3289736	905883	599583	252706	629481	923504	363611	282953	1212532	1405457	3225327	530152	220418	915809	1191789	2037920	371126	602400	0.06966	2.29017	87	0.0661283	2.48413	103	0.23353	0.93911	13
	30	31 Citric acid	C6H8O7	[M-H]-	191.02	-4.9	15.33	0.41	25	Citric acid	-	3710862	11478462	710731	506178	257028	166909	899740	853655	156219	145882	752118	3436092	916880	-	239327	463936	530144	156000	-	282285	481834	2065486	-	98837	132009	131385	1873662	-	2601550	0.0464863	3.72345	228	0.593335	0.678973	3	0.0849277	2.05282	45
	31	32 Citrulline	C6H13N3O3	[M+H]+	176.103	-0.4	11.92	0.1	30	Citrulline	1425763	1799087	2260911	2400608	1930799	809983	1694810	1957449	1269781	1643327	773178	1494180	1999898	2101582	960167	2220899	986050	2045781	1553344	1595239	1469997	1402571	1747795	1604052	1072024	865579	1551219	1646454	1827085	2151571	0.358206	0.126171	5	0.568785	0.174931	3	0.0733756	0.465478	29
	32	33 Creatine	C4H9N3O2	[M+H]+	132.077	-2.7	10.72	0.09	30	Creatine	114426496	62184920	91949816	54298624	39389676	90234504	56365508	72353816	46626404	37184528	88216416	61245104	76823696	51508672	40622540	85057632	34927004	58785272	41113020	31937696	107800544	54384184	83309000	61793964	35461124	113201264	54210604	90821968	51025776	38363680	0.0814955	0.597511	1197	0.0126148	1.13898	9854	0.0624955	0.698541	1629
	33	34 Creatinine	C4H7N3O	[M+H]+	114.066	1.9	6.47	0.09	30	Creatinine	19661954	19596748	34187284	17512098	14024824	16249593	19331724	25005288	12385026	11242196	16797050	21959740	26870860	11997194	11630251	14295895	10098766	17530352	10555874	8221454	14788052	15086232	26770978	14149485	9700824	17522714	36368936	24473168	11365371	12566555	0.021691	0.931045	1536	0.01397	1.17359	2671	0.791594	0.160023	31
	34	35 Cyclic AMP	C10H12N5O6P	[M-H]-	328.045	0.5	6.95	0.15	30	Cyclic AMP	37975	43129	57841	27910	23486	38155	35114	60067	23239	18576	34291	42228	53169	17008	20831	26622	18878	36861	17837	12042	27153	29151	43579	23444	16116	31901	27269	53053	17700	15770	0.0080147	1.17844	9	0.00359991	1.60355	25	0.0265959	0.826081	2
	35	36 Cytidine	C9H13N3O5	[M+H]+	244.093	-0.8	8.28	0.39	30	Cytidine	653725	429597	746690	658248	372091	730478	811657	1078209	540302	407244	705208	902783	668055	514989	412136	511372	279166	733461	500259	257190	530769	467999	802341	528420	301268	654329	515208	979836	597428	371058	0.0197774	0.629502	54	0.00278452	1.43637	558	0.0153457	0.994786	82
	36	37 Cytidine monophosphate	C9H14N3O8P	[M+H]+	324.059	-2.6	12.97	0.25	26	Cytidine monophosphate	131165	187934	503395	128667	112060	143094	132947	264328	91184	85210	151849	216570	288848	95328	102454	-	93631	137225	-	-	141595	138957	271229	81800	82142	129937	134194	228927	-	123276	0.0293971	1.38806	13	0.0492586	1.15471	7	0.0987153	0.797233	3
	37	38 Cytidine triphosphate	C9H16N3O14P3	[M-H]-	481.977	2.6	15.29	0.23	0	Cytidine triphosphate	-	-	-	-	-	-	-	-	-	-	-	-	-	-	-	-	-	-	-	-	-	-	-	-	-	-	-	-	-	-	NA	0	0	NA	0	0	NA	0	0
	38	39 Cytosine	C4H5N3O	[M+H]+	112.05	2.3	9.32	0.43	0	Cytosine	-	-	-	-	-	-	-	-	-	-	-	-	-	-	-	-	-	-	-	-	-	-	-	-	-	-	-	-	-	-	NA	0	0	NA	0	0	NA	0	0
	39	40 D-2-Hydroxyglutaric acid	C5H8O5	[M-H]-	147.03	-6.8	12.19	0.09	30	D-2-Hydroxyglutaric acid	1727479	2362282	4659738	1844658	1567260	1331443	2015350	3425057	1856844	1511060	1592085	2642044	3616392	1692121	1222399	1494629	1221046	2455097	1284417	1111856	1373760	1938974	3315753	1404473	1250490	1716137	1859279	4256851	1384894	1853240	0.0190258	1.29955	304	0.0269888	1.25019	209	0.042365	0.998433	118
	40	41 D-Glucose	C6H12O6	[M-H]-	179.056	-4.5	10.98	0.28	30	D-Glucose	237356	234614	218624	507379	322338	267869	274297	244099	251920	275868	309576	269428	153660	383354	279260	232194	212345	205900	239675	193973	123344	235239	193466	371619	362953	225527	207695	174599	284276	292043	0.0544725	-0.641843	7	0.139647	-0.564749	3	0.0952492	-0.191147	2
	41	42 D-Glyceraldehyde 3-phosphate	C3H7O6P	[M-H]-	168.991	-6.8	13.01	0.24	1	D-Glyceraldehyde 3-phosphate	-	-	22478	-	-	-	-	-	-	-	-	-	-	-	-	-	-	-	-	-	-	-	-	-	-	-	-	-	-	-	NA	0	0	NA	0	0	NA	0	0
	42	43 Dihydrofolic acid	C19H21N7O6	[M+H]+	444.163	8.8	13	0.23	0	Dihydrofolic acid	-	-	-	-	-	-	-	-	-	-	-	-	-	-	-	-	-	-	-	-	-	-	-	-	-	-	-	-	-	-	NA	0	0	NA	0	0	NA	0	0
	43	44 Dihydroxyacetone phosphate	C3H7O6P	[M-H]-	168.991	-5.6	12.88	0.33	4	Dihydroxyacetone phosphate	-	12106	69714	-	-	-	-	-	-	-	-	-	21326	-	-	-	-	-	-	-	-	-	17680	-	-	-	-	-	-	-	0.373901	0.328836	0	0.373901	0.328836	0	0.373901	0.328836	0
	44	45 D-Ribose 5-phosphate	C5H11O8P	[M-H]-	229.012	-2.5	12.61	0.21	28	D-Ribose 5-phosphate	37074	132588	251408	85270	65884	57423	68434	100949	64357	44071	69441	93494	131402	87704	33046	29715	36565	63962	32806	-	75483	67772	130445	32230	29667	57780	57635	152950	-	50217	0.0334779	1.92185	8	0.0443005	1.70528	6	0.0939672	1.10067	2
	45	46 D-Sedoheptulose 7-phosphate	C7H15O10P	[M-H]-	289.033	0	13.03	0.28	8	D-Sedoheptulose 7-phosphate	-	16581	46841	-	-	-	-	19421	-	-	-	12653	30336	-	-	-	-	-	-	-	-	14041	30274	-	-	-	-	16954	-	-	0.211637	0.838475	0	0.211637	0.838475	0	0.270919	0.702034	0
	46	47 dTDP	C10H16N2O11P2	[M-H]-	401.016	-5.6	12.08	0.25	0	dTDP	-	-	-	-	-	-	-	-	-	-	-	-	-	-	-	-	-	-	-	-	-	-	-	-	-	-	-	-	-	-	NA	0	0	NA	0	0	NA	0	0
	47	48 FAD	C27H33N9O15P2	[M+H]+	786.164	-4.2	8.67	0.33	24	FAD	14024	21411	39331	16554	12052	18971	18517	20361	15640	-	16641	23863	32769	12258	-	-	15299	13011	-	-	21193	16876	36602	11320	10915	14250	20993	26030	-	10251	0.0967705	1.27212	0	0.0956634	1.27923	0	0.346643	0.508648	0
	48	49 Folic acid	C19H19N7O6	[M+H]+	442.147	-1.9	13.72	0.23	0	Folic acid	-	-	-	-	-	-	-	-	-	-	-	-	-	-	-	-	-	-	-	-	-	-	-	-	-	-	-	-	-	-	NA	0	0	NA	0	0	NA	0	0
	49	50 Fructose 1,6-bisphosphate	C6H14O12P2	[M-H]-	338.989	0.1	14.77	0.34	0	Fructose 1,6-bisphosphate	-	-	-	-	-	-	-	-	-	-	-	-	-	-	-	-	-	-	-	-	-	-	-	-	-	-	-	-	-	-	NA	0	0	NA	0	0	NA	0	0
	50	51 Fructose 6-phosphate	C6H13O9P	[M-H]-	259.022	-1	13.49	0.05	29	Fructose 6-phosphate	39500	129759	223872	109949	112489	97703	86231	97345	94877	39361	97280	134995	154431	151297	39225	-	38310	61013	38575	37240	127540	120868	203640	39589	29437	114313	80545	135062	38325	63006	0.0836431	1.77878	4	0.101089	1.62398	3	0.325116	0.737603	1
	51	52 Fumaric acid	C4H4O4	[M-H]-	115.004	-10.3	12.96	0.15	30	Fumaric acid	503002	1476192	5904062	1001516	1308848	710596	1599915	3714198	1091258	677496	575296	1455428	3640518	845797	1093716	252510	688290	1662728	516659	368730	596023	1387570	3508472	959987	581864	634706	1207103	2955387	450909	1041145	0.0222273	2.07588	318	0.0245592	2.02862	280	0.0510222	1.30765	92
	52	53 Glucose 6-phosphate	C6H13O9P	[M-H]-	259.022	-1	13.6	0.1	30	Glucose 6-phosphate	47271	100264	192806	100898	115841	106360	90087	118194	84573	44490	132354	160857	106376	170074	64389	28303	52031	50992	51338	66524	104355	103824	182885	71732	42496	138636	100720	178089	50585	64923	0.143517	1.2463	2	0.144848	1.24391	2	0.32617	0.683145	1
	53	54 Glutathione	C10H17N3O6S	[M+H]+	308.091	-1.9	11.45	0.49	1	Glutathione	-	-	74196	-	-	-	-	-	-	-	-	-	-	-	-	-	-	-	-	-	-	-	-	-	-	-	-	-	-	-	NA	0	0	NA	0	0	NA	0	0
	54	55 Glycerol 3-phosphate	C3H9O6P	[M-H]-	171.006	-5.9	11.86	0.22	30	Glycerol 3-phosphate	388675	565060	1147476	504958	405260	369637	393248	645681	414282	270150	392249	600253	697000	406771	356379	148829	277054	425779	225497	147187	431521	522726	933168	333730	260071	389310	550245	909151	206168	352215	0.0420964	1.56721	36	0.0457442	1.57841	33	0.176528	0.748497	6
	55	56 Glycine	C2H5NO2	[M+H]+	76.0393	9.1	11.73	0.09	30	Glycine	4046332	4860406	6178646	5668544	4877841	3136616	5939952	6831492	5031516	5200625	3528022	5777356	5370010	4939846	4832742	3280990	3727336	6203392	4724503	4342441	3816575	4578298	5917863	5505034	3968801	2836278	10054475	6363498	4801706	4095585	0.0147935	0.298371	464	0.000286305	0.575202	26793	0.984317	0.00976114	6
	56	57 Guanidoacetic acid	C3H7N3O2	[M+H]+	118.061	2.5	11.69	0.1	30	Guanidoacetic acid	997828	542089	811396	1117072	667839	473968	471578	521949	619428	562230	432050	447367	570228	546721	355291	664519	352800	543383	519037	488635	586329	537658	987449	814448	696565	665825	840422	750657	903178	931371	0.935336	0.0286278	1	0.776653	0.108247	1	0.392044	0.39847	2
	57	58 Guanine	C5H5N5O	[M+H]+	152.057	-1.2	8.51	0.19	30	Guanine	1065696	1256120	1999087	1196514	866404	1160464	1417852	1532055	1191058	1856571	1429489	1849981	1832605	1279268	1244176	1603089	882599	1340236	1088324	1175677	969124	1141663	1469069	1026411	1085602	1119696	1147501	1933980	1467425	1741503	0.163353	0.405057	11	0.417398	0.244884	4	0.0591399	0.580602	33
	58	59 Guanosine	C10H13N5O5	[M+H]+	284.099	-2.6	8.87	0.17	30	Guanosine	153563	202802	394584	203494	154171	207604	264989	364187	147653	181660	201296	303666	349365	108776	142895	160514	118202	282194	116314	93237	191704	169513	343089	126383	94042	189859	167507	399905	116975	121514	0.00289416	1.51113	227	0.00247388	1.73118	298	0.00742481	1.17125	75
	59	60 Guanosine diphosphate	C10H15N5O11P2	[M-H]-	442.017	0.1	14.79	0.24	1	Guanosine diphosphate	-	-	16760	-	-	-	-	-	-	-	-	-	-	-	-	-	-	-	-	-	-	-	-	-	-	-	-	-	-	-	NA	0	0	NA	0	0	NA	0	0
	60	61 Guanosine monophosphate	C10H14N5O8P	[M+H]+	364.065	-2.1	13.43	0.17	19	Guanosine monophosphate	-	217776	435571	162367	106433	129644	111477	155780	125693	-	135598	155447	238481	118838	-	-	-	95376	-	-	168086	123789	211154	-	-	132665	113720	270050	-	-	0.131079	1.01663	2	0.131079	1.01663	2	0.192704	0.794149	1
	61	62 Guanosine triphosphate	C10H16N5O14P3	[M-H]-	521.983	1.4	16.8	0.26	0	Guanosine triphosphate	-	-	-	-	-	-	-	-	-	-	-	-	-	-	-	-	-	-	-	-	-	-	-	-	-	-	-	-	-	-	NA	0	0	NA	0	0	NA	0	0
	62	63 Homocysteine	C4H9NO2S	[M-H]-	134.028	-9.1	8.56	0.2	0	Homocysteine	-	-	-	-	-	-	-	-	-	-	-	-	-	-	-	-	-	-	-	-	-	-	-	-	-	-	-	-	-	-	NA	0	0	NA	0	0	NA	0	0
	63	64 Hypotaurine	C2H7NO2S	[M+H]+	110.027	2.5	11.12	0.09	30	Hypotaurine	2955597	2491912	4342560	1478195	1317441	2112794	2188896	3349581	871717	917390	1997759	3141020	3818249	1490722	563659	2061482	1035609	1573208	546257	694504	3260260	3028460	5185241	1974741	1108548	4066220	2353339	5238869	2933306	1569533	0.193576	1.13724	33	0.0811213	1.83079	112	0.239414	0.902649	24
	64	65 Hypoxanthine	C5H4N4O	[M+H]+	137.046	-0.6	7.62	0.25	30	Hypoxanthine	606707	873349	2232244	1526932	1121261	4401927	3239330	7017936	997968	327364	3084476	2642355	1750353	248320	932320	223465	646824	2755812	861849	552701	2839222	1696620	8314312	1686337	537460	4378682	1972513	2847654	629950	513699	0.127414	2.13068	98	0.0892624	3.11731	251	0.164156	1.68918	60
	65	66 Inosine	C10H12N4O5	[M+H]+	269.088	-2.4	7.6	0.16	30	Inosine	224859	247785	690474	419318	367327	1548024	974093	2268930	301137	117037	885236	813201	492450	90431	297035	96419	169510	818972	272160	198082	822675	493303	2459883	521035	170832	1343382	558258	807125	199137	174890	0.138054	2.04179	25	0.0979156	2.90952	59	0.164483	1.74254	18
	66	67 Inosinic acid	C10H13N4O8P	[M+H]+	349.054	-1.7	12.31	0.42	12	Inosinic acid	-	48678	137252	32221	30272	30599	-	53862	-	-	-	38413	52261	-	-	-	-	-	-	-	38248	-	56645	-	-	34241	-	68898	-	-	0.129602	0.800167	1	0.129602	0.800167	1	0.129602	0.800167	1
	67	68 L-Acetylcarnitine	C9H17NO4	[M+H]+	204.123	-1.2	7.54	0.29	30	L-Acetylcarnitine	83716784	33669264	58496596	39231348	23495820	64982880	32981356	38822936	37475924	18593772	57853200	35908312	37959464	32186772	16861918	53781092	22440948	29497470	33086018	16091310	72890120	31411138	48331444	42452088	18521580	89523904	37667976	54794072	47953392	29957472	0.745238	0.102919	62	0.0597599	1.03839	1130	0.193703	0.535171	279
	68	69 L-Alanine	C3H7NO2	[M+H]+	90.055	4.9	10.87	0.08	30	L-Alanine	52710924	88058904	149634288	52802952	65398720	44533580	88709048	118179248	42125216	59626352	43823600	96125120	111836384	40689652	56005620	35115836	48988840	87142656	33674508	36926616	41262328	72805760	120772936	42906240	42422804	45253220	69923496	121571640	39017056	46320984	0.0036184	1.51111	58434	0.00433288	1.39058	45903	0.0278904	0.781236	5353
	69	70 L-Arginine	C6H14N4O2	[M+H]+	175.119	-2	18.53	0.21	30	L-Arginine	19492970	20178328	37612800	25649518	16335283	19176744	20349496	24093292	19348022	17706692	20208904	24340194	23952576	20354232	15739377	18134498	15540535	23191842	18189894	14155008	17538556	20024786	25750990	16835222	17212390	18344668	18219010	28937126	17424402	21731562	0.00768098	0.570323	4199	0.0401228	0.552569	798	0.0190404	0.534066	1669
	70	71 L-Asparagine	C4H8N2O3	[M+H]+	133.061	-1.3	11.43	0.12	30	L-Asparagine	5914368	9025464	13679803	5427978	6634520	5487508	8994922	12101293	4345906	6129866	5628621	10033205	11286187	4366395	5721252	4999652	5903176	9268928	3695171	4388888	4554276	7123404	11723746	4156018	5125690	4995504	7825638	11766065	4378499	5891578	0.00129014	1.42149	15568	0.00343553	1.08837	4968	0.0164656	0.651679	853
	71	72 L-Aspartic acid	C4H7NO4	[M-H]-	132.03	-10.9	11.81	0.07	30	L-Aspartic acid	57000964	53981656	81519680	53580060	43865744	50402120	54120164	62554812	46159148	37116844	48220276	59254484	65863636	44244204	36272804	38608784	35677748	53221644	37257440	29924034	48469948	50810252	72216520	43902388	31528822	47767852	50447740	70421640	39152588	33740060	0.0167637	0.703036	5117	0.00549979	1.0409	18147	0.0664526	0.516322	1194
	72	73 L-Carnitine	C7H16NO3	[Cat]+	162.113	-2.3	9.58	0.11	30	L-Carnitine	415053792	208232512	342839680	197308304	143157616	317719168	191498368	235223280	175047680	111257000	306441568	197755360	242907952	146669360	94267264	236314576	109042528	178060224	133245728	79051792	346239264	164725216	273038016	172324944	91966040	439656736	172591008	302275840	192758816	115686664	0.109009	0.596266	2893	0.0162822	1.3938	27975	0.073698	0.755163	4579
	73	74 L-Cystathionine	C7H14N2O4S	[M+H]+	223.075	-2.7	13.23	0.26	4	L-Cystathionine	-	-	25439	-	-	-	-	-	-	-	-	-	22030	-	-	-	-	-	-	-	-	-	22017	-	-	-	-	21857	-	-	0.116257	0.214452	0	0.116257	0.214452	0	0.116257	0.214452	0
	74	75 L-Cysteine	C3H7NO2S	[M+H]+	122.027	1.4	14.91	0.31	0	L-Cysteine	-	-	-	-	-	-	-	-	-	-	-	-	-	-	-	-	-	-	-	-	-	-	-	-	-	-	-	-	-	-	NA	0	0	NA	0	0	NA	0	0
	75	76 L-Cystine	C6H12N2O4S2	[M-H]-	239.017	-1.2	12.78	0.32	23	L-Cystine	-	-	-	51288	32482	-	37849	27373	44532	50241	23170	44073	-	65219	41132	31401	44164	25135	50361	24969	-	53541	23050	49990	77218	-	38546	28709	50891	77065	0.000120885	-0.975916	619	0.122519	-1.22105	1	0.013351	-0.825324	5
	76	77 L-Glutamic acid	C5H9NO4	[M+H]+	148.06	-1.6	11.55	0.19	30	L-Glutamic acid	141798320	112727064	153279056	122318184	94500744	108762864	121349200	147889952	104410080	97260440	115853792	126497528	134464432	101465272	92171232	108411320	89515896	133020624	101543840	85659544	101503624	118923704	151914048	112916280	86708248	109375336	125990232	158072096	94646296	93694144	0.00842336	0.519225	21328	0.00175945	0.735567	111838	0.0548739	0.405625	3128
	77	78 L-Glutamine	C5H10N2O3	[M+H]+	147.076	-2.9	11.19	0.11	30	L-Glutamine	267715600	287835520	478571264	219542960	239650144	231165920	278635680	378167488	168097056	198891824	225088080	294224640	336635104	169290832	182670832	199664752	159708912	281872416	139750832	144000160	216559600	241851024	374326272	173938384	163497424	235090928	225962656	358136992	156418304	171900944	0.00385014	1.10947	138650	0.0038636	1.08124	136337	0.0274902	0.692796	16090
	78	79 L-Histidine	C6H9N3O2	[M+H]+	156.077	-1.6	10.7	0.11	30	L-Histidine	9254003	13016523	24581852	10451421	9005975	7356773	10377043	14487091	7599506	7049750	7777506	11642700	13658631	7692482	7298132	5643384	5096802	10296940	4586479	8367138	8057433	8130808	15775001	6371322	5600726	7747443	7664352	15547985	5267577	7320744	0.010476	1.35902	2361	0.025985	0.967193	789	0.0268846	0.994326	772
	79	80 L-Isoleucine	C6H13NO2	[M+H]+	132.102	-0.8	7.29	0.27	30	L-Isoleucine	6461006	12861307	26867740	11277915	12029751	5792314	13266970	19871966	7299456	11903598	6585142	15176644	17541676	8766474	10988622	4726546	6419879	11408295	6489868	8073642	4272820	9456361	18870272	7825900	9405322	5816388	8505437	17648976	6069422	9338754	0.0179542	1.23333	1491	0.0402221	0.837669	554	0.0339747	0.975058	697
	80	81 L-Kynurenine	C10H12N2O3	[M+H]+	209.092	15	6.03	0.21	20	L-Kynurenine	-	262557	169379	388420	236290	220905	667513	325388	509997	774168	-	310340	602056	316141	-	412080	455646	960954	-	-	-	-	479873	-	-	-	386714	498835	403209	752834	0.0699387	2.08708	24	0.26071	1.26671	4	0.158216	1.15836	7
	81	82 L-Lactic acid	C3H6O3	[M-H]-	89.0244	-13.7	7.37	0.09	2	L-Lactic acid	-	-	6360899	5544720	-	-	-	-	-	-	-	-	-	-	-	-	-	-	-	-	-	-	-	-	-	-	-	-	-	-	NA	0	0	NA	0	0	NA	0	0
	82	83 L-Leucine	C6H13NO2	[M+H]+	132.102	-1.6	7.68	0.12	30	L-Leucine	7593018	14451424	27752368	13371028	14139877	7100898	15541562	23456816	9117170	12077668	6706306	15590260	21048882	9358882	12648846	5589174	7370829	12574221	7292990	9841236	4733663	10831864	20395946	9342031	9304411	5725610	9699567	18615216	7701178	10005554	0.020657	1.08386	1298	0.0346202	0.823407	688	0.0375297	0.88658	653
	83	84 L-Lysine	C6H14N2O2	[M+H]+	147.113	-1.4	18.02	0.08	30	L-Lysine	211792	231835	429557	277539	194971	231759	173397	232187	200334	135511	171820	254408	202619	262889	176518	268006	191748	268748	153566	198560	201831	201280	265806	136843	132971	217447	210675	403953	170166	314573	0.02676	1.02693	18	0.236025	0.538601	2	0.0718433	0.636529	6
	84	85 L-Malic acid	C4H6O5	[M-H]-	133.014	-10.9	12.96	0.11	30	L-Malic acid	5934972	17868702	66135604	13505537	16331879	9401865	18779946	40272768	13537968	7387058	7779316	17254258	41723428	11535968	12587295	2965886	9072529	18465304	6238744	4021198	7958512	16746106	41448192	11508235	6872316	8768208	15094685	33803972	5289288	12418904	0.028516	2.02441	2776	0.0310043	2.00722	2529	0.0695212	1.19575	739
	85	86 L-Methionine	C5H11NO2S	[M+H]+	150.058	-0.8	8.01	0.14	30	L-Methionine	2971496	5675752	10145158	4166820	5033980	2636908	5085964	7999736	2928872	4220354	2547125	5414611	7445432	2987006	3889885	2120210	2461057	4766626	2204222	3216632	1675358	3979280	7486218	3281628	3484533	2327862	3421631	7171448	2770402	3417174	0.015159	1.2343	716	0.0228418	0.94089	414	0.0299998	0.977915	320
	86	87 L-Phenylalanine	C9H11NO2	[M+H]+	166.086	-1.5	6.79	0.27	30	L-Phenylalanine	3967477	7986590	16832780	7104076	7616220	3281105	8408510	12036351	4431056	6562803	3756642	8879666	11119930	4572826	5708092	3454911	3488034	6958539	3347889	6772519	2248126	5532150	11669327	4683747	4852016	3539562	4841014	10345334	3957624	5391704	0.0176704	1.27298	934	0.0581127	0.767807	225	0.029889	1.06367	499
	87	88 L-Proline	C5H9NO2	[M+H]+	116.071	0.8	9.07	0.09	30	L-Proline	81037192	185520432	346767328	87484096	135143888	64862696	183916256	271270368	67767080	118444488	72299216	209821216	276772096	69716376	119842264	56443512	85993096	162281312	54177820	74265976	65966984	141400944	273160000	70324696	90411592	72168928	135233808	259500800	64582420	92702968	0.00873112	1.87786	62021	0.0145901	1.43299	29373	0.0470679	0.938403	7177
	88	89 L-Serine	C3H7NO3	[M+H]+	106.05	3.1	11.85	0.11	30	L-Serine	4022333	4011109	6548868	3461698	3578180	3123538	4489050	5478180	2760092	3620904	3442466	4722086	4924776	2880607	2890484	3857232	2568672	4625185	2546999	4047966	3452582	3553467	4987754	2907524	2694958	3215396	3654732	5484247	2853079	3104476	0.00115763	0.861776	6124	0.0206524	0.616465	309	0.0141763	0.626835	452
	89	90 L-Threonine	C4H9NO3	[M-H]-	118.051	-9.9	10.68	0.11	30	L-Threonine	952679	1064213	2364774	1178712	1176579	609166	1377522	1214449	1092185	1057943	1037506	1862170	1338381	884771	779814	653919	537904	1361722	749317	828888	751825	1078701	1562878	633296	666123	841215	1041776	1854911	676027	931145	0.00351555	1.21517	753	0.00850409	0.978191	278	0.0350812	0.846315	64
	90	91 L-Tryptophan	C11H12N2O2	[M+H]+	205.097	-1.2	8.01	0.2	30	L-Tryptophan	619915	774486	1480648	582499	607748	431857	698504	1089384	541487	511644	436972	782721	967132	508182	516651	439565	436949	700066	387705	648584	450225	607717	1104835	536001	446911	495655	534403	962972	482045	455296	0.0228298	0.977437	60	0.040303	0.835773	32	0.0367761	0.809704	35
	91	92 L-Tyrosine	C9H11NO3	[M+H]+	182.081	-1.5	9.32	0.13	30	L-Tyrosine	4269038	4937616	10232425	4438972	4525632	3140052	4940448	7194212	3306581	3622154	3392491	4950858	6423858	3438125	3260280	3249576	2374679	4559100	2486430	3650932	2925366	3806240	7106032	3258256	2930097	3510054	3588335	6759890	2900544	3096301	0.0170119	1.09169	565	0.0243029	0.928985	367	0.0342321	0.915346	259
	92	93 L-Valine	C5H11NO2	[M+H]+	118.086	1.2	8.86	0.1	30	L-Valine	5150490	6626232	11119255	7130324	6513868	4245915	7263902	9021056	5009040	5679586	4518034	7473250	8516032	4913638	4976203	4082542	3554790	6277830	4139324	5312238	3520406	5363891	9568109	6035561	4548929	4260682	4905795	9127726	4310978	4755111	0.0430976	0.785762	263	0.0308188	0.772832	366	0.0332556	0.853183	351
	93	94 N6-Acetyl-L-lysine	C8H16N2O3	[M+H]+	189.123	-8.8	3	0.07	0	N6-Acetyl-L-lysine	-	-	-	-	-	-	-	-	-	-	-	-	-	-	-	-	-	-	-	-	-	-	-	-	-	-	-	-	-	-	NA	0	0	NA	0	0	NA	0	0
	94	95 N-Acetylglutamic acid	C7H11NO5	[M+H]+	190.071	-1.6	11.28	0.42	30	N-Acetylglutamic acid	60387	94660	127322	63737	85012	65676	106094	133848	70319	59800	70181	82318	128269	48154	57481	51331	49922	104765	60343	45994	56912	91606	93634	56850	52103	57685	84804	94783	56736	71813	0.000437873	0.753298	300	0.00862736	0.787026	15	0.171315	0.373356	1
	95	96 N-Acetylglutamine	C7H12N2O4	[M-H]-	187.072	-4.4	8.02	0.37	30	N-Acetylglutamine	115854	195732	387495	91202	125296	101734	143500	233504	106051	94668	132363	162732	281741	83656	82945	92214	78359	153025	53342	57548	104981	107442	210768	63679	73263	110639	109066	260130	64791	100624	0.00911173	1.77892	51	0.0173098	1.43076	22	0.0279646	1.0813	12
	96	97 N-Acetyl-L-alanine	C5H9NO3	[M+H]+	132.065	-0.2	6.9	0.33	30	N-Acetyl-L-alanine	253917	292079	516552	206475	186072	173560	280946	339745	139471	146337	183973	342012	349678	123725	142518	168659	156339	225402	102409	102417	203063	197216	355745	145628	126986	225146	219018	348451	175342	147038	0.0234131	1.13466	21	0.0140227	1.30418	38	0.061239	0.699147	7
	97	98 N-Acetyl-L-methionine	C7H13NO3S	[M+H]+	192.069	-1.5	4.76	0.44	30	N-Acetyl-L-methionine	22448	31370	53605	20122	20575	10092	24219	43434	11603	29986	17497	29011	36929	23331	21142	15378	12974	23318	16050	14562	16147	20393	43050	17914	13958	17084	23476	44571	17704	28604	0.0452071	1.10242	1	0.0982059	0.957598	1	0.0745554	0.964712	1
	98	99 N-Acetyl-L-phenylalanine	C11H13NO3	[M+H]+	208.097	-1.5	3.32	0.06	0	N-Acetyl-L-phenylalanine	-	-	-	-	-	-	-	-	-	-	-	-	-	-	-	-	-	-	-	-	-	-	-	-	-	-	-	-	-	-	NA	0	0	NA	0	0	NA	0	0
	99	100 N-Acetylornithine	C7H14N2O3	[M+H]+	175.108	-0.7	9.78	0.26	30	N-Acetylornithine	464769	583195	1632224	436617	408636	381316	654224	1036947	289083	274427	349848	760700	894257	307173	309338	294747	232575	573081	218930	158751	376522	500300	905060	308331	196660	389144	427830	901613	247286	245683	0.00912742	1.61939	177	0.00629682	1.98515	312	0.0404735	1.03581	30
	100	101 N-Acetylserine	C5H9NO4	[M-H]-	146.046	-7.4	8.25	0.09	30	N-Acetylserine	436907	781998	1592306	424370	468830	375346	599702	1033517	351813	407395	360371	662019	1119869	310239	363064	339568	363106	556287	272102	419489	376265	525138	1165821	347145	273243	393549	579794	1086660	338809	383175	0.0329213	1.55176	56	0.042307	1.38438	40	0.0915042	0.936048	15
	101	102 NAD	C21H28N7O14P2	[Cat]+	664.116	-1.1	10.83	0.1	30	NAD	419240	2067054	5893406	373075	634238	351870	1434142	3044282	251205	239028	160668	1613753	3927748	80812	439864	139215	545689	1448887	92916	46358	148799	735697	2708258	109404	159657	228470	807808	2145006	118094	209680	0.00542246	4.29784	4004	0.00592349	3.92225	2866	0.0196079	1.5929	215
	102	103 NADH	C21H29N7O14P2	[M-H]-	664.117	-14.5	10.84	0.24	10	NADH	-	21022	55164	-	-	-	13213	33892	-	-	-	14921	45430	-	-	-	-	12977	-	-	-	-	28769	-	-	-	12251	24603	-	-	0.0623629	1.14511	1	0.0623629	1.14511	1	0.0763537	1.04073	0
	103	104 NADP	C21H29N7O17P3	[Cat]+	744.083	0.1	13.52	0.3	2	NADP	-	-	77616	-	-	-	-	-	-	-	-	-	-	-	-	-	-	-	-	-	-	-	13871	-	-	-	-	-	-	-	0.373901	0.175088	0	0.373901	0.175088	0	0.373901	0.175088	0
	104	105 NADPH	C21H30N7O17P3	[M-H]-	744.084	3.8	13.94	0.18	1	NADPH	-	-	11634	-	-	-	-	-	-	-	-	-	-	-	-	-	-	-	-	-	-	-	-	-	-	-	-	-	-	-	NA	0	0	NA	0	0	NA	0	0
	105	106 Niacinamide	C6H6N2O	[M+H]+	123.055	-0.7	4.52	0.09	30	Niacinamide	187905024	187230048	288376320	135197984	163869632	153633312	204108784	240267472	125957016	182224320	175610784	246768208	201535104	125094616	127371440	131981560	95387736	180509424	109622440	116623800	170439472	182987504	244053328	122012544	104408672	187884944	156388032	276105088	106125456	115906040	0.0132177	1.05273	27163	0.01291	1.05625	27856	0.0812672	0.688501	3753
	106	107 Nicotinic acid	C6H5NO2	[M-H]-	122.025	-8.6	5.7	0.46	0	Nicotinic acid	-	-	-	-	-	-	-	-	-	-	-	-	-	-	-	-	-	-	-	-	-	-	-	-	-	-	-	-	-	-	NA	0	0	NA	0	0	NA	0	0
	107	108 O-Phosphoethanolamine	C2H8NO4P	[M+H]+	142.026	-0.5	12.49	0.25	30	O-Phosphoethanolamine	973785	2781226	8869318	2833258	1806566	3033242	1379572	2105056	1423641	285996	2787433	2068746	3421310	2019879	830484	207183	746634	1116890	691024	373356	3979502	2102548	5440295	988764	310684	3175416	1703117	3536620	685348	1171860	0.109352	2.09348	81	0.098754	2.44328	110	0.232543	1.1488	23
	108	109 Ornithine	C5H12N2O2	[M+H]+	133.097	1.1	17.03	0.2	3	Ornithine	-	-	100331	-	-	-	-	-	-	-	-	-	-	-	-	-	-	-	-	114684	-	-	-	-	-	-	-	61691	-	-	0.373901	0.0194357	0	0.393406	-0.371836	0	0.373901	0.0194357	0
	109	110 Orotic acid	C5H4N2O4	[M-H]-	155.01	-6.7	7.77	0.25	17	Orotic acid	-	246513	1966792	25918	26384	-	177338	1648153	24582	24692	-	157256	1411567	-	-	-	46754	152917	-	-	-	78825	437599	21566	-	-	72747	362722	-	-	0.0250756	3.97509	106	0.0248922	4.02452	110	0.0426458	2.26496	22
	110	111 Orotidylic acid	C10H13N2O11P	[M+H]+	369.033	12.8	2.77	0.18	0	Orotidylic acid	-	-	-	-	-	-	-	-	-	-	-	-	-	-	-	-	-	-	-	-	-	-	-	-	-	-	-	-	-	-	NA	0	0	NA	0	0	NA	0	0
	111	112 Oxidized glutathione	C20H32N6O12S2	[M+H]+	613.159	-1.1	14.34	0.13	30	Oxidized glutathione	2890542	2492877	5287487	1309499	746700	3000984	1388254	1944771	1098448	643057	2658333	1952915	2508168	889269	634867	999152	844144	1599680	655464	490053	2571876	1367058	2864847	823962	486664	2775821	1198289	2799905	717387	1093213	0.0151275	1.72544	345	0.0194377	1.81127	281	0.0430077	1.09129	88
	112	113 Oxoadipic acid	C6H8O5	[M-H]-	159.03	-6.3	7.55	0.07	0	Oxoadipic acid	-	-	-	-	-	-	-	-	-	-	-	-	-	-	-	-	-	-	-	-	-	-	-	-	-	-	-	-	-	-	NA	0	0	NA	0	0	NA	0	0
	113	114 Oxoglutaric acid	C5H6O5	[M-H]-	145.014	-7.9	12.55	0.13	26	Oxoglutaric acid	627884	1246723	3420160	852797	768379	456138	582444	1845269	363472	377762	378818	798340	2583626	493500	-	404958	-	659547	-	-	411488	698901	2320292	377951	361971	457437	410243	1520105	372125	476672	0.0776232	2.02734	49	0.0837326	1.916	43	0.108382	1.62104	28
	114	115 Palmitic acid	C16H32O2	[M-H]-	255.233	-1.8	2.72	0.14	17	Palmitic acid	-	-	3572584	2800154	6762808	3370199	-	-	3183717	-	2903039	2905959	2796298	9555495	2809452	-	2374376	-	-	-	3523369	2545510	5057749	-	-	2987427	2408841	3781236	-	-	0.143006	0.853729	35	0.143006	0.853729	35	0.258351	0.564474	17
	115	116 Pantothenic acid	C9H17NO5	[M+H]+	220.118	-2.5	6.38	0.24	30	Pantothenic acid	21421826	52263604	74244016	32089462	29743922	19122012	44770996	59271084	29127712	24949890	17424278	49250212	58126884	25285272	23445304	14907198	22894160	37589064	19554320	14107144	16370923	35124272	57484024	24058324	17353260	15984533	28281826	48058524	19011506	15972489	0.0108274	1.19255	7239	0.00540261	1.59338	17740	0.0484525	0.729906	1309
	116	117 Phenol	C6H6O	[M-H]-	93.0346	-12.8	3.23	0.05	0	Phenol	-	-	-	-	-	-	-	-	-	-	-	-	-	-	-	-	-	-	-	-	-	-	-	-	-	-	-	-	-	-	NA	0	0	NA	0	0	NA	0	0
	117	118 Phosphocreatine	C4H10N3O5P	[M-H]-	210.029	-3.5	12.03	0.16	15	Phosphocreatine	10152	17261	47090	15545	13738	14713	-	-	-	-	10033	-	17206	12135	-	-	-	-	-	-	18812	10256	30791	-	-	16072	13490	16998	-	-	0.203962	0.945832	0	0.203962	0.945832	0	0.266414	0.776078	0
	118	119 Phosphoenolpyruvic acid	C3H5O6P	[M-H]-	166.975	-6	14.28	0.22	11	Phosphoenolpyruvic acid	-	44768	193064	24115	20340	-	-	40333	-	-	-	28262	63228	-	-	-	-	-	-	-	-	22366	71724	-	-	-	-	30116	-	29659	0.264008	1.0116	0	0.342274	0.80152	0	0.279254	0.960239	0
	119	120 Phosphoribosyl pyrophosphate	C5H13O14P3	[M-H]-	388.945	-7.1	17.54	0	0	Phosphoribosyl pyrophosphate	-	-	-	-	-	-	-	-	-	-	-	-	-	-	-	-	-	-	-	-	-	-	-	-	-	-	-	-	-	-	NA	0	0	NA	0	0	NA	0	0
	120	121 Phosphorylcholine	C5H14NO4P	[M+H]+	184.073	-2.8	11.62	0.14	30	Phosphorylcholine	266456224	508797216	955133120	219178752	346866048	286908448	472039488	625246336	163476288	175434640	292013088	599140160	684397120	164307120	230731680	93086872	192551920	403712288	89823192	79875296	304434400	352924224	688753792	119999568	126649616	303709536	340223008	598835648	83150632	166954256	0.00536108	2.52929	356116	0.007478	2.17903	208397	0.0528394	0.933245	15522
	121	122 Phosphoserine	C3H8NO6P	[M+H]+	186.016	-1.6	13.14	0.35	10	Phosphoserine	-	42454	378996	-	16583	-	-	28664	-	-	-	17947	68756	-	-	-	-	-	-	-	-	16960	115960	-	-	-	-	36445	-	26976	0.256824	1.8459	1	0.300479	1.53097	0	0.261481	1.8038	0
	122	123 Pipecolic acid	C6H11NO2	[M+H]+	130.086	-0.4	7.66	0.36	29	Pipecolic acid	184572	238468	411548	179435	164902	157184	279094	322411	211003	163506	171055	261769	361457	152361	148395	132914	152084	231362	137819	-	139419	203022	346371	143005	128926	187642	182837	275723	132300	178350	0.0120204	1.04674	36	0.0203474	1.00581	21	0.045367	0.665863	8
	123	124 Propionylcarnitine	C10H19NO4	[M+H]+	218.139	-0.9	6.45	0.32	30	Propionylcarnitine	5922884	4448599	5817862	1751850	1092697	5294982	4046258	3793707	1511216	648428	5226602	4809234	4588818	1221136	667919	3599126	2384953	2875568	1171699	507259	5646846	3669387	4792867	1819631	640730	6305074	3463327	4504832	1781842	806187	0.0175668	1.3507	410	0.00484105	2.63908	3030	0.284887	0.355037	16
	124	125 Pyruvic acid	C3H4O3	[M-H]-	87.0088	-12.3	6.23	0.16	18	Pyruvic acid	224498	-	194611	328876	196456	162467	170317	235131	-	-	-	195648	172220	237551	-	191403	-	-	-	-	-	181914	190640	225202	178126	187152	-	216153	237537	-	0.59173	-0.137383	0	0.278604	0.208897	1	0.311397	0.197661	1
	125	126 Ribose 1-phosphate	C5H11O8P	[M-H]-	229.012	-2.1	12.39	0.11	25	Ribose 1-phosphate	20527	56333	112125	34931	25181	26143	37524	57705	35180	22942	38267	52263	49429	28984	-	-	21172	35704	21637	-	32181	38704	54746	-	-	35909	24118	81642	17117	28432	0.0444543	1.62755	3	0.0576309	1.46553	2	0.110776	1.03482	1
	126	127 Saccharopine	C11H20N2O6	[M-H]-	275.125	12.5	11.63	0.24	0	Saccharopine	-	-	-	-	-	-	-	-	-	-	-	-	-	-	-	-	-	-	-	-	-	-	-	-	-	-	-	-	-	-	NA	0	0	NA	0	0	NA	0	0
	127	128 S-Adenosylhomocysteine	C14H20N6O5S	[M-H]-	383.114	0.2	9.7	0.12	10	S-Adenosylhomocysteine	-	17473	36899	-	-	-	13414	23690	-	-	-	18331	28611	-	-	-	-	16585	-	-	-	11410	29201	-	-	-	-	33401	-	-	0.0315312	1.4003	2	0.0315312	1.4003	2	0.0349079	1.33404	1
	128	129 S-Adenosylmethionine	C15H22N6O5S	[M+H]+	399.144	-2.3	11.91	0.32	30	S-Adenosylmethionine	339602	1591450	4092220	632038	668344	330735	1049620	1751911	703656	543288	360954	1454205	2915669	615018	396716	266664	472428	1173223	432349	227985	531677	1390385	3313172	253781	388313	346029	929584	2390154	257038	852527	0.0336243	2.8661	283	0.0495914	2.22702	131	0.113505	1.30018	35
	129	130 Sarcosine	C3H7NO2	[M+H]+	90.055	6	11.36	0.11	30	Sarcosine	9113715	10204611	15473783	6875654	7411818	9141267	12072371	14233559	7000348	7406603	8137628	12979977	13104644	5588464	7439190	7492494	6123254	9868263	5017294	5344359	8081480	10191122	14198962	6121263	5668515	8521164	10160406	14160151	6499470	6760628	0.0103218	1.11592	1955	0.0104461	1.10488	1922	0.11796	0.529987	132
	130	131 Succinic acid	C4H6O4	[M-H]-	117.019	-9.7	12.17	0.07	10	Succinic acid	-	-	1580736	-	-	-	1158971	1380797	-	1027968	-	1294927	1225430	-	-	-	-	1091391	-	-	-	-	1245792	-	-	-	-	1412553	-	1036194	0.0624464	0.30427	22	0.0691189	0.292936	20	0.0624464	0.30427	22
	131	132 Taurine	C2H7NO3S	[M-H]-	124.007	-10.4	11.46	0.19	30	Taurine	97831696	63432796	89772024	59361592	51062852	74614072	72015584	77257432	53767232	52053652	80447544	75850248	74907224	48983808	48114404	73236160	44264652	64694572	52146736	43841660	72057992	59441180	75560664	56209372	42647200	83333800	61845332	81625120	56512844	49072612	0.0209997	0.428462	4131	0.00570281	0.710835	17098	0.064249	0.422505	1347
	132	133 Thymidine	C10H14N2O5	[M-H]-	241.083	-1.2	4.57	0.22	0	Thymidine	-	-	-	-	-	-	-	-	-	-	-	-	-	-	-	-	-	-	-	-	-	-	-	-	-	-	-	-	-	-	NA	0	0	NA	0	0	NA	0	0
	133	134 Uracil	C4H4N2O2	[M+H]+	113.035	3.9	6.68	0.4	28	Uracil	79037	29005	49772	39733	-	85971	46951	81676	42577	29512	67049	48406	55634	34613	31919	78275	36397	55395	39426	34573	68965	31501	58492	43722	-	64336	27029	68169	43641	31439	0.0108823	0.521953	7	0.00268239	0.975641	34	0.0034927	0.939492	25
	134	135 Ureidopropionic acid	C4H8N2O3	[M-H]-	131.046	-9.3	11.44	0.15	30	Ureidopropionic acid	1310473	1834389	3216457	1193928	1444263	1078932	1935696	2717887	900513	1296342	1110195	2240282	2572105	906510	1366921	921770	1207608	1880059	796135	986873	954991	1526371	2544391	990877	1081903	1194807	1481586	2553520	864886	1161790	0.00331112	1.39578	1275	0.00545831	1.11102	673	0.0196001	0.727081	158
	135	136 Ureidosuccinic acid	C5H8N2O5	[M-H]-	175.036	-5.4	13.65	0.1	29	Ureidosuccinic acid	11008	698624	8556811	68769	123940	31880	741791	8575318	105581	25042	35829	565002	6978112	59519	39739	-	140657	378991	15624	16353	22316	222067	2996872	31389	15162	22982	185588	2136240	14202	155035	0.0777851	6.49257	1075	0.0829197	4.88497	338	0.0983288	3.32953	103
	136	137 Uric acid	C5H4N4O3	[M+H]+	169.036	10	10.72	0	2	Uric acid	-	-	-	22774	-	-	-	-	18212	-	-	-	-	-	-	-	-	-	-	-	-	-	-	-	-	-	-	-	-	-	NA	0	0	NA	0	0	NA	0	0
	137	138 Uridine	C9H12N2O6	[M-H]-	243.062	-1.1	6.67	0.32	30	Uridine	285592	154619	180538	139797	116431	422526	248076	335888	241499	149389	356376	260003	178360	155914	135829	246979	140477	253254	201258	125393	311585	147004	226759	201956	111709	288821	139226	273326	146352	119168	0.0409227	0.455006	7	0.000708515	1.08033	552	0.00135731	0.820053	256
	138	139 Uridine 5'-diphosphate	C9H14N2O12P2	[M+H]+	405.01	-1.7	13.25	0.11	29	Uridine 5'-diphosphate	94762	186190	616025	111823	107240	98327	144771	262019	64480	33723	98799	179244	331534	90659	54610	26384	57487	115255	29206	-	102946	108380	321636	41433	22191	104522	96796	222948	19909	30911	0.0339586	2.86536	27	0.029524	3.35298	42	0.09789	1.3289	4
	139	140 Uridine 5'-monophosphate	C9H13N2O9P	[M-H]-	323.029	-0.6	12.07	0.18	30	Uridine 5'-monophosphate	581980	991765	1983408	483733	510656	484274	836872	1236890	584112	729975	550435	1213004	1327826	473678	464961	730188	525550	998824	402840	421162	508342	775586	980668	376449	429238	536098	644839	1724093	432013	659265	0.0276361	1.61236	91	0.0465945	1.29469	46	0.083382	0.928429	21
	140	141 Uridine diphosphate glucose	C15H24N2O17P2	[M-H]-	565.048	1	13.26	0.09	30	Uridine diphosphate glucose	235777	1089289	3096543	403533	421136	366517	493212	971113	226911	98563	329305	745188	1609506	307699	131560	56125	172349	295690	69991	12665	421635	334733	1457725	111988	61353	354582	300144	918740	62087	65850	0.0737062	3.45266	72	0.0659951	4.25587	136	0.140927	1.72696	14
	141	142 Uridine diphosphate-N-acetylglucosamine	C17H27N3O17P2	[M+H]+	608.089	-1.2	12.16	0.09	30	Uridine diphosphate-N-acetylglucosamine	294912	401641	855892	200421	232182	233063	350155	496686	181560	176326	222558	387381	558869	147631	156675	236013	162598	354194	104686	90627	234686	258612	567157	129366	115855	234688	241888	561948	109161	127772	0.00574168	2.11163	229	0.00570854	2.14979	235	0.0229379	1.16152	35
	142	143 Uridine triphosphate	C9H15N2O15P3	[M-H]-	482.961	0.7	15.02	0.25	2	Uridine triphosphate	-	-	30259	-	-	-	-	-	-	-	-	-	-	-	-	-	-	-	-	-	-	-	10293	-	-	-	-	-	-	-	0.373901	0.014022	0	0.373901	0.014022	0	0.373901	0.014022	0
	143	144 Valerylcarnitine	C12H23NO4	[M+H]+	246.17	-2	4.87	0.41	30	Valerylcarnitine	1332217	1108612	2068242	628738	433059	1020615	764173	1188625	459314	294226	932105	826764	1152082	387258	242363	601917	421205	815362	393002	211161	1015614	654724	1346785	607357	265059	1050751	633354	1214716	452634	262693	0.0203412	1.21666	92	0.00542917	2.19221	577	0.0344043	0.982292	49
	144	145 Xanthine	C5H4N4O2	[M-H]-	151.026	-6.3	8.59	0.11	30	Xanthine	497536	566532	738766	798202	629853	478890	459368	691448	449845	477868	446963	499463	517361	508934	496473	345837	346011	430427	397966	655420	333121	405429	627781	506829	488280	419604	402215	526903	420467	455769	0.259225	0.258306	2	0.957343	-0.0130092	1	0.075098	0.458372	8
	145	146 Xanthosine	C10H12N4O6	[M-H]-	283.068	0	7.73	0.21	0	Xanthosine	-	-	-	-	-	-	-	-	-	-	-	-	-	-	-	-	-	-	-	-	-	-	-	-	-	-	-	-	-	-	NA	0	0	NA	0	0	NA	0	0
	146	147 Xanthylic acid	C10H13N4O9P	[M-H]-	363.035	0.4	11.16	0	0	Xanthylic acid	-	-	-	-	-	-	-	-	-	-	-	-	-	-	-	-	-	-	-	-	-	-	-	-	-	-	-	-	-	-	NA	0	0	NA	0	0	NA	0	0
Figure 9 - Figure Supplement 1B
		Skeleton_Metabolite	Metabolite	Formula	Ion Type	RT Start (min)	RT End (min)	m/z Tolerance (ppm)	RT Tolerance (min)	mz	obs_mz	ppm	winner	RT	RT_min	RT_max	RT_range	WT1 IgM	WT2 IgM	WT3 IgM	KO1 IgM	KO2 IgM	KO3 IgM	Blank_0	Blank_1	Blank_2	Blank_3	Blank_4	Blank_5	ttest_pval	1/pvalue	WT IgM_Mean	KO IgM_Mean	Log2FoldChange	LogFoldChange	blank_threshold	combined_mean	impact_score	Detection
	0	1-Methylnicotinamide	1 1-Methylnicotinamide	C7H8N2O	[M+H]+	19	21	15	0.2	137.071	137.071	-0.3	S14406	20.76	20.51	21	0.49	44013.5	44013.5	44013.5	44013.5	44013.5	44013.5	13465	14960	11760	9911	9388	8543	NA	NA	44013.5	44013.5	0	1	44013.5	44013.5	0	0
	1	2,3-Diphosphoglyceric acid	2 2,3-Diphosphoglyceric acid	C3H8O10P2	[M-H]-	12	15	15	0.2	264.952	264.952	0	S14414	12.99	12.99	12.99	0	10000	10000	10000	10000	10000	10000	0	0	0	0	0	0	NA	NA	10000	10000	0	1	10000	10000	0	0
	2	3-Hydroxybutyric acid	3 3-Hydroxybutyric acid	C4H8O3	[M-H]-	5.7	7.7	15	0.2	103.04	103.039	-10.4	S14405	6.07	6.03	6.2	0.17	321621	321621	321621	321621	321621	321621	93076	99252	105272	111792	111422	102428	NA	NA	321621	321621	0	1	321621	321621	0	0
	3	3-Phosphoglyceric acid	4 3-Phosphoglyceric acid	C3H7O7P	[M-H]-	13	15	15	0.2	184.986	184.985	-4.1	S14396	13.76	13.6	14.01	0.41	25557	13310.5	13310.5	13310.5	13310.5	13310.5	2014	3065	0	1542	0	0	0.373901	2.6745	17392.7	13310.5	0.385914	1.30669	13310.5	15351.6	0	1
	4	4,5-Dihydroorotic acid	5 4,5-Dihydroorotic acid	C5H6N2O4	[M-H]-	7.5	9.5	15	0.2	157.025	157.024	-6.9	S14396	8.59	8.47	8.81	0.34	176153	35339	42597	17766	56194	34980	1963	2131	1852	1908	0	0	0.362419	2.75923	84696.3	36313.3	1.2218	2.33238	13927	60504.8	0	6
	5	4-Hydroxyproline	6 4-Hydroxyproline	C5H9NO3	[M+H]+	10.2	11.2	15	0.2	132.065	132.066	3.6	S14396	10.67	10.49	10.79	0.3	94213568	90345704	95260488	47997052	63231388	61309496	157568	22099	232193	20088	269120	19813	0.00204941	487.944	9.32733e+07	5.75126e+07	0.697584	1.62179	370440	7.53929e+07	59662	6
	6	5'-Methylthioadenosine	7 5'-Methylthioadenosine	C11H15N5O3S	[M+H]+	3	5	15	0.2	298.097	298.096	-2.5	S14396	4.18	4.13	4.33	0.2	1645664	1056889	1703918	328601	860976	772839	34769	34125	79904	52957	47998	44602	0.0368382	27.1458	1.46882e+06	654139	1.16699	2.24543	157178	1.06148e+06	65	6
	7	5-Phosphoribosylamine	8 5-Phosphoribosylamine	C5H12NO7P	[M-H]-	11.5	13.5	15	0.2	228.028	228.027	-2.5	S14407	11.62	11.62	11.62	0	10000	10000	10000	10000	10000	10000	0	0	0	0	0	0	NA	NA	10000	10000	0	1	10000	10000	0	0
	8	6-Phosphogluconic acid	9 6-Phosphogluconic acid	C6H13O10P	[M-H]-	14	17	15	0.2	275.017	275.018	3.8	S14413	14.66	14.66	14.89	0.23	10000	10000	10000	10000	10000	10000	0	0	0	0	0	0	NA	NA	10000	10000	0	1	10000	10000	0	0
	9	Acetoacetic acid	10 Acetoacetic acid	C4H6O3	[M-H]-	8.3	10.3	15	0.2	101.024	101.023	-11.1	S14419	9.57	9.36	9.81	0.46	215488	189239	201100	119423	173221	196871	17239	20659	19734	16666	20789	14620	0.183517	5.44909	201942	163172	0.307553	1.23761	64853.5	182557	1	6
	10	Acetyl-CoA	11 Acetyl-CoA	C23H38N7O17P3S	[M+H]+	8	11	15	0.2	810.133	810.126	-8.1	S14406	9.56	9.32	9.76	0.44	10000	10610	10000	10000	10000	10000	0	0	0	0	0	0	0.373901	2.6745	10203.3	10000	0.0290405	1.02033	10000	10101.7	0	1
	11	Acetylcysteine	12 Acetylcysteine	C5H9NO3S	[M+H]+	6	8	15	0.2	164.038	164.037	-0.6	S14416	7.2	7.1	7.39	0.28	85404	72964	98935	29666	115933	121998	0	0	0	0	0	0	0.916516	1.09109	85767.7	89199	-0.0565937	0.961532	10000	87483.3	0	6
	12	Adenine	13 Adenine	C5H5N5	[M+H]+	5	7	15	0.2	136.062	136.062	-1.3	S14421	6.15	6.08	6.2	0.13	26811068	32900122	41221736	19281554	24383152	25772112	198355	145643	261076	155858	291073	208085	0.0854619	11.7011	3.36443e+07	23145606	0.539624	1.45359	640045	2.8395e+07	483	6
	13	Adenosine	14 Adenosine	C10H13N5O4	[M+H]+	4.5	7	15	0.2	268.104	268.103	-2.7	S14421	5.81	5.68	5.88	0.2	47167076	61802288	64877084	33820488	37996820	41477344	278740	96361	347887	170435	243354	120470	0.0266812	37.4796	57948816	37764884	0.617734	1.53446	638624	47856850	2752	6
	14	Adenosine diphosphate ribose	15 Adenosine diphosphate ribose	C15H23N5O14P2	[M-H]-	10.9	12.9	15	0.2	558.064	558.065	1.6	S14396	11.73	11.65	11.74	0.09	462185	522087	694680	141411	435113	365218	0	0	0	0	0	0	0.0947186	10.5576	559651	313914	0.834157	1.78282	10000	436782	8	6
	15	Adenosine monophosphate	16 Adenosine monophosphate	C10H14N5O7P	[M+H]+	9.8	11.8	15	0.2	348.07	348.07	-2.5	S14396	10.73	10.49	10.78	0.28	17438130	12230496	16324308	8583584	13165397	12190543	366872	101064	523627	165335	372653	132992	0.129498	7.7221	15330978	1.13132e+07	0.438446	1.35514	841272	1.33221e+07	139	6
	16	Adenosine triphosphate	17 Adenosine triphosphate	C10H16N5O13P3	[M-H]-	12.5	14.5	15	0.2	505.988	505.989	0.8	S14396	13.3	13.2	13.55	0.35	22535	17022.5	17022.5	17022.5	17022.5	17022.5	3262	3489	2499	2523	2272	0	0.373901	2.6745	18860	17022.5	0.147887	1.10795	17022.5	17941.2	0	1
	17	Adenylsuccinic acid	18 Adenylsuccinic acid	C14H18N5O11P	[M-H]-	14.5	16.5	15	0.2	462.067	462.067	0.7	S14396	15.1	15.1	15.1	0	10000	10000	10000	10000	10000	10000	0	0	0	0	0	0	NA	NA	10000	10000	0	1	10000	10000	0	0
	18	ADP	19 ADP	C10H15N5O10P2	[M-H]-	11.1	13.1	15	0.2	426.022	426.022	0.4	S14396	11.94	11.73	12.18	0.46	61392	25531	29695	25531	34443	25531	4551	3394	9554	5958	5187	2418	0.425722	2.34895	38872.7	28501.7	0.44771	1.36387	25531	33687.2	0	3
	19	Allantoin	20 Allantoin	C4H6N4O3	[M-H]-	9.3	11.3	15	0.2	157.037	157.036	-6.5	S14396	10.4	10.17	10.42	0.26	439870	463767	513170	251045	384701	304839	9742	9366	7912	8632	6009	5865	0.023304	42.9112	472269	313528	0.591013	1.5063	33763	392899	25	6
	20	Aminoadipic acid	21 Aminoadipic acid	C6H11NO4	[M-H]-	5.9	7.9	15	0.2	160.061	160.06	-6.5	S14396	7.26	7.18	7.33	0.15	265007	200901	242257	127390	178619	185973	7331	7261	7767	6624	6651	6944	0.0518929	19.2705	236055	163994	0.52548	1.43941	31289	200024	6	6
	21	Argininosuccinic acid	22 Argininosuccinic acid	C10H18N4O6	[M-H]-	12.5	14.5	15	0.2	289.115	289.115	-0.6	S14396	13.37	13.34	13.44	0.1	50037	27584	35483	10996.5	23361	19911	0	0	1993	0	0	0	0.0599242	16.6877	37701.3	18089.5	1.05946	2.08416	10996.5	27895.4	1	5
	22	Beta-Alanine	23 Beta-Alanine	C3H7NO2	[M+H]+	9.8	10.5	15	0.2	90.055	90.0555	6	S14396	10.22	10.15	10.29	0.15	699153	840878	896678	326717	583382	462696	37374	41810	51416	44178	57362	63616	0.0199803	50.0492	812236	457598	0.827818	1.775	157878	634917	56	6
	23	Betaine	24 Betaine	C5H11NO2	[M+H]+	7	8.2	15	0.2	118.086	118.087	2.1	S14419	7.82	7.77	7.86	0.09	75313024	69174448	80137064	36150136	68798984	94607608	792370	726656	808142	775922	906214	825538	0.652671	1.53217	7.48748e+07	6.65189e+07	0.170717	1.12562	2427421	7.06969e+07	122	6
	24	Butyrylcarnitine	25 Butyrylcarnitine	C11H21NO4	[M+H]+	4.2	6.2	15	0.2	232.154	232.154	-1.4	S14396	5.6	5.35	5.8	0.45	3559095	2931355	2879622	1326223	1812064	1886533	13029	8168	12348	7167	7406	8333	0.00666169	150.112	3.12336e+06	1674940	0.898988	1.86476	38225.5	2.39915e+06	672	6
	25	Carbamoyl phosphate	26 Carbamoyl phosphate	CH4NO5P	[M-H]-	27	30	15	0.2	139.975	139.975	-6.7	S14420	27.14	27.03	27.38	0.35	43134	43134	43134	43134	43134	43134	9118	9671	12234	10877	11536	12832	NA	NA	43134	43134	0	1	43134	43134	0	0
	26	Carnosine	27 Carnosine	C9H14N4O3	[M+H]+	10.6	12.6	15	0.2	227.114	227.113	-1.6	S14397	11.62	11.51	11.66	0.16	70596	88839	119944	57234	94313	71419	0	0	0	0	0	4591	0.35528	2.81468	93126.3	74322	0.3254	1.25301	12295.5	83724.2	0	6
	27	CDP	28 CDP	C9H15N3O11P2	[M+H]+	13	15	15	0.2	404.026	404.025	-1.1	S14396	13.8	13.8	14.03	0.23	14101	14101	14101	14101	14101	14101	3103	0	2577	2522	0	0	NA	NA	14101	14101	0	1	14101	14101	0	0
	28	Choline	29 Choline	C5H14NO	[Cat]+	11	15	15	0.2	104.107	104.107	2	S14401	12.79	12.77	12.95	0.19	65341700	137643984	132707872	52242876	77870736	83694288	595216	513419	1061739	670693	1124359	730914	0.182798	5.47053	111897852	71269300	0.65083	1.57007	2358170	91583576	787	6
	29	cis-Aconitic acid	30 cis-Aconitic acid	C6H6O6	[M-H]-	14.1	16.1	15	0.2	173.009	173.008	-5.6	S14396	14.84	14.79	14.9	0.11	2839788	1801594	2416500	629481	1405457	1191789	39336	14591	90842	27291	67847	29645	0.028286	35.3532	2.35263e+06	1.07558e+06	1.12916	2.18732	144776	1.7141e+06	133	6
	30	Citric acid	31 Citric acid	C6H8O7	[M-H]-	14.2	16.2	15	0.2	191.02	191.019	-4.9	S14396	15.33	15.09	15.5	0.41	3710862	166909	752118	463936	481834	131385	48251	36912	38748	22529	9730	6181	0.343342	2.91255	1.5433e+06	359052	2.10375	4.29826	91175.5	951174	12	6
	31	Citrulline	32 Citrulline	C6H13N3O3	[M+H]+	10.9	12.9	15	0.2	176.103	176.103	-0.4	S14397	11.92	11.87	11.97	0.1	1799087	1694810	1494180	986050	1402571	1551219	130346	114090	106736	109557	113664	107830	0.141885	7.04794	1.66269e+06	1313280	0.340347	1.26606	351112	1.48799e+06	13	6
	32	Creatine	33 Creatine	C4H9N3O2	[M+H]+	10	11.5	15	0.2	132.077	132.076	-2.7	S14394	10.72	10.67	10.76	0.09	62184920	56365508	61245104	34927004	54384184	54210604	102564	113799	133180	91551	162779	98566	0.145638	6.86636	59931844	4.78406e+07	0.325087	1.25274	361220	5.38862e+07	464	6
	33	Creatinine	34 Creatinine	C4H7N3O	[M+H]+	5.2	7.2	15	0.2	114.066	114.066	1.9	S14420	6.47	6.41	6.5	0.09	19596748	19331724	21959740	10098766	15086232	36368936	130348	151946	160577	140858	167498	164364	0.979452	1.02098	2.02961e+07	20517978	-0.0156881	0.989185	467796	2.0407e+07	21	6
	34	Cyclic AMP	35 Cyclic AMP	C10H12N5O6P	[M-H]-	5.8	7.8	15	0.2	328.045	328.045	0.5	S14401	6.95	6.83	6.98	0.15	43129	35114	42228	18878	29151	27269	0	1670	0	0	0	0	0.0205002	48.78	40157	25099.3	0.678002	1.59992	10835	32628.2	3	6
	35	Cytidine	36 Cytidine	C9H13N3O5	[M+H]+	7.1	9.1	15	0.2	244.093	244.093	-0.8	S14401	8.28	8.03	8.42	0.39	429597	811657	902783	279166	467999	515208	17784	12327	25280	20847	24859	21923	0.14366	6.96088	714679	420791	0.764192	1.69842	71510	567735	7	6
	36	Cytidine monophosphate	37 Cytidine monophosphate	C9H14N3O8P	[M+H]+	11.8	13.8	15	0.2	324.059	324.058	-2.6	S14396	12.97	12.72	12.97	0.25	187934	132947	216570	93631	138957	134194	13563	14172	31833	24885	30556	26721	0.11607	8.61546	179150	122261	0.55121	1.46531	80865	150706	2	6
	37	Cytidine triphosphate	38 Cytidine triphosphate	C9H16N3O14P3	[M-H]-	15	20	15	0.2	481.977	481.978	2.6	S14396	15.29	15.29	15.51	0.23	10000	10000	10000	10000	10000	10000	0	0	0	0	0	0	NA	NA	10000	10000	0	1	10000	10000	0	0
	38	Cytosine	39 Cytosine	C4H5N3O	[M+H]+	9	11	15	0.2	112.05	112.051	2.3	S14406	9.32	9.13	9.56	0.43	176672	176672	176672	176672	176672	176672	48006	53973	58902	55478	55966	61019	NA	NA	176672	176672	0	1	176672	176672	0	0
	39	D-2-Hydroxyglutaric acid	40 D-2-Hydroxyglutaric acid	C5H8O5	[M-H]-	11.6	13.6	15	0.2	147.03	147.029	-6.8	S14396	12.19	12.14	12.23	0.09	2362282	2015350	2642044	1221046	1938974	1859279	229855	211004	211241	200397	197295	194993	0.0834681	11.9806	2339892	1.6731e+06	0.483919	1.39854	632392	2.0065e+06	34	6
	40	D-Glucose	41 D-Glucose	C6H12O6	[M-H]-	9	11	15	0.2	179.056	179.055	-4.5	S14397	10.98	10.74	11.02	0.28	234614	274297	269428	212345	235239	207695	23316	35852	13508	8084	10053	11895	0.0533705	18.737	259446	218426	0.248289	1.1878	61354	238936	5	6
	41	D-Glyceraldehyde 3-phosphate	42 D-Glyceraldehyde 3-phosphate	C3H7O6P	[M-H]-	13	14	15	0.2	168.991	168.99	-6.8	S14396	13.01	13	13.24	0.24	10000	10000	10000	10000	10000	10000	0	0	0	0	0	0	NA	NA	10000	10000	0	1	10000	10000	0	0
	42	Dihydrofolic acid	43 Dihydrofolic acid	C19H21N7O6	[M+H]+	13	16	15	0.2	444.163	444.166	8.8	S14411	13	13	13.23	0.23	10000	10000	10000	10000	10000	10000	0	0	0	0	0	0	NA	NA	10000	10000	0	1	10000	10000	0	0
	43	Dihydroxyacetone phosphate	44 Dihydroxyacetone phosphate	C3H7O6P	[M-H]-	12	13	15	0.2	168.991	168.99	-5.6	S14396	12.88	12.66	12.99	0.33	12106	10000	10000	10000	10000	10000	0	0	0	0	0	0	0.373901	2.6745	10702	10000	0.0978804	1.0702	10000	10351	0	1
	44	D-Ribose 5-phosphate	45 D-Ribose 5-phosphate	C5H11O8P	[M-H]-	12.4	13.8	15	0.2	229.012	229.011	-2.5	S14396	12.61	12.45	12.66	0.21	132588	68434	93494	36565	67772	57635	9074	2363	9707	3921	5518	2691	0.100955	9.90544	98172	53990.7	0.862602	1.81831	26637	76081.3	1	6
	45	D-Sedoheptulose 7-phosphate	46 D-Sedoheptulose 7-phosphate	C7H15O10P	[M-H]-	12.2	14.2	15	0.2	289.033	289.033	0	S14396	13.03	12.96	13.24	0.28	16581	10821	12653	10821	14041	10821	0	0	1642	0	0	0	0.508509	1.96653	13351.7	11894.3	0.166745	1.12252	10821	12623	0	3
	46	dTDP	47 dTDP	C10H16N2O11P2	[M-H]-	11	13	15	0.2	401.016	401.013	-5.6	S14416	12.08	12.08	12.33	0.25	10000	10000	10000	10000	10000	10000	0	0	0	0	0	0	NA	NA	10000	10000	0	1	10000	10000	0	0
	47	FAD	48 FAD	C27H33N9O15P2	[M+H]+	7.6	9.6	15	0.2	786.164	786.161	-4.2	S14396	8.67	8.51	8.84	0.33	21411	18517	23863	15299	16876	20993	0	0	0	0	0	0	0.197756	5.05674	21263.7	17722.7	0.262795	1.1998	10000	19493.2	0	6
	48	Folic acid	49 Folic acid	C19H19N7O6	[M+H]+	13	16	15	0.2	442.147	442.146	-1.9	S14397	13.72	13.72	13.95	0.23	10000	10000	10000	10000	10000	10000	0	0	0	0	0	0	NA	NA	10000	10000	0	1	10000	10000	0	0
	49	Fructose 1,6-bisphosphate	50 Fructose 1,6-bisphosphate	C6H14O12P2	[M-H]-	14.1	16.1	15	0.2	338.989	338.989	0.1	S14396	14.77	14.67	15.02	0.34	18127	18127	18127	18127	18127	18127	6826	4726	2118	2584	0	0	NA	NA	18127	18127	0	1	18127	18127	0	0
	50	Fructose 6-phosphate	51 Fructose 6-phosphate	C6H13O9P	[M-H]-	12.6	13.5	15	0.2	259.022	259.022	-1	S14396	13.49	13.45	13.5	0.05	129759	86231	134995	38310	120868	80545	11998	0	11436	2425	8659	3738	0.261731	3.82072	116995	79907.7	0.550041	1.46413	29128	98451.3	1	6
	51	Fumaric acid	52 Fumaric acid	C4H4O4	[M-H]-	12.2	14.2	15	0.2	115.004	115.002	-10.3	S14396	12.96	12.85	13	0.15	1476192	1599915	1455428	688290	1387570	1207103	52793	39348	71865	41432	53519	40914	0.124196	8.05178	1.51051e+06	1094321	0.465001	1.38032	159936	1.30242e+06	14	6
	52	Glucose 6-phosphate	53 Glucose 6-phosphate	C6H13O9P	[M-H]-	13.6	14.4	15	0.2	259.022	259.022	-1	S14396	13.6	13.6	13.7	0.1	100264	90087	160857	52031	103824	100720	7649	0	9703	4038	9923	2902	0.318901	3.13577	117069	85525	0.452945	1.36883	27107.5	101297	0	6
	53	Glutathione	54 Glutathione	C10H17N3O6S	[M+H]+	10	13	15	0.2	308.091	308.091	-1.9	S14396	11.45	11.2	11.69	0.49	40103	40103	40103	40103	40103	40103	10010	10356	10537	10029	9547	9727	NA	NA	40103	40103	0	1	40103	40103	0	0
	54	Glycerol 3-phosphate	55 Glycerol 3-phosphate	C3H9O6P	[M-H]-	11.5	13	15	0.2	171.006	171.005	-5.9	S14396	11.86	11.73	11.95	0.22	565060	393248	600253	277054	522726	550245	11068	2716	18637	4700	16503	5002	0.554323	1.804	519520	450008	0.207228	1.15447	39313	484764	1	6
	55	Glycine	56 Glycine	C2H5NO2	[M+H]+	10.7	12.7	15	0.2	76.0393	76.04	9.1	S14420	11.73	11.65	11.74	0.09	4860406	5939952	5777356	3727336	4578298	10054475	68177	24394	69611	27213	76676	26858	0.782335	1.27822	5.5259e+06	6.12004e+06	-0.14733	0.90292	156464	5.82297e+06	8	6
	56	Guanidoacetic acid	57 Guanidoacetic acid	C3H7N3O2	[M+H]+	10.7	12.7	15	0.2	118.061	118.061	2.5	S14397	11.69	11.64	11.74	0.1	542089	471578	447367	352800	537658	840422	12196	11059	13292	10148	12624	10075	0.568482	1.75907	487011	576960	-0.244516	0.844099	44697	531986	1	6
	57	Guanine	58 Guanine	C5H5N5O	[M+H]+	7.7	9.7	15	0.2	152.057	152.056	-1.2	S14396	8.51	8.44	8.63	0.19	1256120	1417852	1849981	882599	1141663	1147501	32335	22322	39849	32073	43726	35296	0.0847003	11.8063	1.50798e+06	1.05725e+06	0.512299	1.42632	112800	1.28262e+06	22	6
	58	Guanosine	59 Guanosine	C10H13N5O5	[M+H]+	7.7	9.7	15	0.2	284.099	284.098	-2.6	S14421	8.87	8.74	8.92	0.17	202802	264989	303666	118202	169513	167507	11815	0	13667	11112	11906	6720	0.0356775	28.0288	257152	151741	0.761015	1.69468	37610	204446	10	6
	59	Guanosine diphosphate	60 Guanosine diphosphate	C10H15N5O11P2	[M-H]-	13.8	15.8	15	0.2	442.017	442.017	0.1	S14396	14.79	14.79	15.04	0.24	13334	13334	13334	13334	13334	13334	0	0	4935	0	1733	0	NA	NA	13334	13334	0	1	13334	13334	0	0
	60	Guanosine monophosphate	61 Guanosine monophosphate	C10H14N5O8P	[M+H]+	12.6	14.6	15	0.2	364.065	364.065	-2.1	S14396	13.43	13.39	13.56	0.17	217776	111477	155447	94995	123789	113720	21643	17099	38338	32288	30830	29792	0.187746	5.32634	161567	110835	0.54372	1.45773	94995	136201	1	5
	61	Guanosine triphosphate	62 Guanosine triphosphate	C10H16N5O14P3	[M-H]-	15	17	15	0.2	521.983	521.984	1.4	S14396	16.8	16.73	16.99	0.26	10000	10000	10000	10000	10000	10000	0	0	0	0	0	0	NA	NA	10000	10000	0	1	10000	10000	0	0
	62	Homocysteine	63 Homocysteine	C4H9NO2S	[M-H]-	7.3	9.3	15	0.2	134.028	134.027	-9.1	S14421	8.56	8.45	8.65	0.2	10000	10000	10000	10000	10000	10000	0	0	0	0	0	0	NA	NA	10000	10000	0	1	10000	10000	0	0
	63	Hypotaurine	64 Hypotaurine	C2H7NO2S	[M+H]+	10	12	15	0.2	110.027	110.027	2.5	S14421	11.12	11.08	11.17	0.09	2491912	2188896	3141020	1035609	3028460	2353339	0	0	0	0	2686	0	0.510665	1.95823	2607276	2139136	0.285515	1.21885	11343	2373206	6	6
	64	Hypoxanthine	65 Hypoxanthine	C5H4N4O	[M+H]+	5.8	7.8	15	0.2	137.046	137.046	-0.6	S14416	7.62	7.53	7.78	0.25	873349	3239330	2642355	646824	1696620	1972513	15422	9350	11044	8307	10471	10744	0.376074	2.65905	2251678	1.43865e+06	0.646283	1.56513	42669	1.84517e+06	8	6
	65	Inosine	66 Inosine	C10H12N4O5	[M+H]+	6.4	8.4	15	0.2	269.088	269.087	-2.4	S14416	7.6	7.52	7.68	0.16	247785	974093	813201	169510	493303	558258	0	0	0	0	0	0	0.340373	2.93796	678360	407024	0.736938	1.66663	10000	542692	3	6
	66	Inosinic acid	67 Inosinic acid	C10H13N4O8P	[M+H]+	11.4	13.4	15	0.2	349.054	349.054	-1.7	S14396	12.31	12.1	12.52	0.42	48678	29722	38413	29722	29722	29722	4281	3625	6732	5741	10236	8829	0.167825	5.95858	38937.7	29722	0.389635	1.31006	29722	34329.8	0	2
	67	L-Acetylcarnitine	68 L-Acetylcarnitine	C9H17NO4	[M+H]+	6.3	8.3	15	0.2	204.123	204.123	-1.2	S14419	7.54	7.29	7.57	0.29	33669264	32981356	35908312	22440948	31411138	37667976	16863	9154	12776	10031	10214	21950	0.460027	2.17379	3.41863e+07	3.05067e+07	0.164293	1.12062	50494	32346499	79	6
	68	L-Alanine	69 L-Alanine	C3H7NO2	[M+H]+	10.6	11.2	15	0.2	90.055	90.0554	4.9	S14396	10.87	10.81	10.89	0.08	88058904	88709048	96125120	48988840	72805760	69923496	236505	108752	274578	104529	305261	139872	0.0270627	36.9512	9.09644e+07	63906032	0.509349	1.42341	594748	7.74352e+07	4073	6
	69	L-Arginine	70 L-Arginine	C6H14N4O2	[M+H]+	18.5	21	15	0.2	175.119	175.119	-2	S14396	18.53	18.51	18.71	0.21	20178328	20349496	24340194	15540535	20024786	18219010	3313046	1488788	6324508	2973431	5497358	2663506	0.121262	8.24662	2.16227e+07	1.79281e+07	0.270321	1.20608	1.11403e+07	1.97754e+07	197	6
	70	L-Asparagine	71 L-Asparagine	C4H8N2O3	[M+H]+	10.3	12.3	15	0.2	133.061	133.061	-1.3	S14396	11.43	11.37	11.49	0.12	9025464	8994922	10033205	5903176	7123404	7825638	39043	5474	35196	7788	40720	7557	0.0217137	46.0539	9351197	6.95074e+06	0.427985	1.34535	77889	8.15097e+06	505	6
	71	L-Aspartic acid	72 L-Aspartic acid	C4H7NO4	[M-H]-	10.8	12.8	15	0.2	132.03	132.029	-10.9	S14396	11.81	11.76	11.83	0.07	53981656	54120164	59254484	35677748	50810252	50447740	555240	27352	599397	43659	504951	31837	0.127101	7.86774	5.57854e+07	4.56452e+07	0.289424	1.22215	891218	5.07153e+07	488	6
	72	L-Carnitine	73 L-Carnitine	C7H16NO3	[Cat]+	8.3	10.3	15	0.2	162.113	162.112	-2.3	S14419	9.58	9.5	9.61	0.11	208232512	191498368	197755360	109042528	164725216	172591008	36541	33290	50699	26500	68345	30381	0.0706869	14.1469	199162080	1.48786e+08	0.420702	1.33858	132878	1.73974e+08	3294	6
	73	L-Cystathionine	74 L-Cystathionine	C7H14N2O4S	[M+H]+	12.2	14.2	15	0.2	223.075	223.074	-2.7	S14396	13.23	13.13	13.39	0.26	17685.5	17685.5	17685.5	17685.5	17685.5	17685.5	4385	4263	3873	0	0	2850	NA	NA	17685.5	17685.5	0	1	17685.5	17685.5	0	0
	74	L-Cysteine	75 L-Cysteine	C3H7NO2S	[M+H]+	13	17	15	0.2	122.027	122.027	1.4	S14411	14.91	14.83	15.14	0.31	10000	10000	10000	10000	10000	10000	0	0	0	0	0	0	NA	NA	10000	10000	0	1	10000	10000	0	0
	75	L-Cystine	76 L-Cystine	C6H12N2O4S2	[M-H]-	11.7	13.7	15	0.2	239.017	239.016	-1.2	S14418	12.78	12.56	12.88	0.32	18587	37849	44073	44164	53541	38546	2340	1941	5218	1816	3810	2049	0.248595	4.02261	33503	45417	-0.438942	0.737675	18587	39460	0	5
	76	L-Glutamic acid	77 L-Glutamic acid	C5H9NO4	[M+H]+	10	13	15	0.2	148.06	148.06	-1.6	S14421	11.55	11.44	11.63	0.19	112727064	121349200	126497528	89515896	118923704	125990232	986252	82541	886897	96169	955059	88091	0.503514	1.98604	120191264	1.11477e+08	0.108591	1.07817	1.5575e+06	1.15834e+08	248	6
	77	L-Glutamine	78 L-Glutamine	C5H10N2O3	[M+H]+	10.1	12.1	15	0.2	147.076	147.076	-2.9	S14396	11.19	11.13	11.24	0.11	287835520	278635680	294224640	159708912	241851024	225962656	1490954	62351	1776222	74879	2287276	78222	0.0383609	26.0682	2.86899e+08	2.09174e+08	0.455836	1.37158	2894952	2.48036e+08	8868	6
	78	L-Histidine	79 L-Histidine	C6H9N3O2	[M+H]+	9.9	11.9	15	0.2	156.077	156.077	-1.6	S14396	10.7	10.65	10.76	0.11	13016523	10377043	11642700	5096802	8130808	7664352	833893	232876	723391	247784	782554	233300	0.0177229	56.4243	1.16788e+07	6.96399e+06	0.745901	1.67702	1536899	9.32137e+06	882	6
	79	L-Isoleucine	80 L-Isoleucine	C6H13NO2	[M+H]+	6	7.5	15	0.2	132.102	132.102	-0.8	S14396	7.29	7.14	7.41	0.27	12861307	13266970	15176644	6419879	9456361	8505437	78492	74367	70478	79233	73501	78646	0.00791959	126.269	13768307	8.12723e+06	0.760516	1.6941	237358	1.09478e+07	2342	6
	80	L-Kynurenine	81 L-Kynurenine	C10H12N2O3	[M+H]+	6	8	15	0.2	209.092	209.095	15	S14411	6.03	6.03	6.25	0.21	262557	667513	310340	455646	26651	386714	6768	6727	5695	0	6745	7367	0.538836	1.85585	413470	289670	0.513371	1.42738	26651	351570	1	5
	81	L-Lactic acid	82 L-Lactic acid	C3H6O3	[M-H]-	6.2	8.2	15	0.2	89.0244	89.0232	-13.7	S14396	7.37	7.35	7.44	0.09	4875252	4875252	4875252	4875252	4875252	4875252	1865850	1800302	1549478	1567628	1466033	1481213	NA	NA	4875252	4875252	0	1	4875252	4875252	0	0
	82	L-Leucine	83 L-Leucine	C6H13NO2	[M+H]+	7.5	9	15	0.2	132.102	132.102	-1.6	S14396	7.68	7.68	7.8	0.12	14451424	15541562	15590260	7370829	10831864	9699567	106187	94095	111825	96936	115014	95497	0.00556395	179.729	1.51944e+07	9.30075e+06	0.708122	1.63368	319777	1.22476e+07	3596	6
	83	L-Lysine	84 L-Lysine	C6H14N2O2	[M+H]+	18	20	15	0.2	147.113	147.113	-1.4	S14396	18.02	18	18.08	0.08	231835	173397	254408	191748	201280	210675	39223	16920	42787	21533	37253	20276	0.493122	2.0279	219880	201234	0.12784	1.09266	98996	210557	0	6
	84	L-Malic acid	85 L-Malic acid	C4H6O5	[M-H]-	12.2	14.2	15	0.2	133.014	133.013	-10.9	S14396	12.96	12.9	13	0.11	17868702	18779946	17254258	9072529	16746106	15094685	465780	265447	690538	344216	569526	234093	0.142188	7.03294	1.79676e+07	1.36378e+07	0.397792	1.31749	1294800	1.58027e+07	146	6
	85	L-Methionine	86 L-Methionine	C5H11NO2S	[M+H]+	6.8	8.8	15	0.2	150.058	150.058	-0.8	S14396	8.01	7.95	8.08	0.14	5675752	5085964	5414611	2461057	3979280	3421631	12933	7753	13317	8193	14877	7297	0.0114192	87.5721	5392109	3.28732e+06	0.713937	1.64027	42185	4.33972e+06	623	6
	86	L-Phenylalanine	87 L-Phenylalanine	C9H11NO2	[M+H]+	5.6	7.6	15	0.2	166.086	166.086	-1.5	S14396	6.79	6.77	7.04	0.27	7986590	8408510	8879666	3488034	5532150	4841014	93644	93218	99615	76312	106462	102934	0.00433209	230.835	8424922	4.6204e+06	0.866646	1.82342	296092	6.52266e+06	2745	6
	87	L-Proline	88 L-Proline	C5H9NO2	[M+H]+	7.9	9.9	15	0.2	116.071	116.071	0.8	S14396	9.07	9.05	9.14	0.09	185520432	183916256	209821216	85993096	141400944	135233808	652448	616968	647406	582075	747051	639295	0.0205456	48.6722	193085968	1.20876e+08	0.675716	1.59739	1.95262e+06	1.56981e+08	12205	6
	88	L-Serine	89 L-Serine	C3H7NO3	[M+H]+	10.8	12.8	15	0.2	106.05	106.05	3.1	S14396	11.85	11.8	11.91	0.11	4011109	4489050	4722086	2568672	3553467	3654732	120885	69191	84513	56985	84049	58083	0.0469663	21.2918	4407415	3258957	0.435522	1.3524	246853	3833186	110	6
	89	L-Threonine	90 L-Threonine	C4H9NO3	[M-H]-	9.5	11.5	15	0.2	118.051	118.05	-9.9	S14396	10.68	10.64	10.75	0.11	1064213	1377522	1862170	537904	1078701	1041776	30955	26740	29924	24730	21603	17447	0.131887	7.58225	1434635	886127	0.695098	1.61899	85699.5	1160381	14	6
	90	L-Tryptophan	91 L-Tryptophan	C11H12N2O2	[M+H]+	6.8	8.8	15	0.2	205.097	205.097	-1.2	S14396	8.01	7.87	8.07	0.2	774486	698504	782721	436949	607717	534403	14894	12207	12549	11236	13102	9638	0.0160069	62.473	751904	526356	0.514508	1.42851	46813	639130	57	6
	91	L-Tyrosine	92 L-Tyrosine	C9H11NO3	[M+H]+	8.2	10.2	15	0.2	182.081	182.081	-1.5	S14396	9.32	9.27	9.39	0.13	4937616	4940448	4950858	2374679	3806240	3588335	54583	43007	56996	39997	49192	44505	0.0193186	51.7637	4942974	3256418	0.602093	1.51792	154140	4099696	322	6
	92	L-Valine	93 L-Valine	C5H11NO2	[M+H]+	8.3	9.2	15	0.2	118.086	118.086	1.2	S14396	8.86	8.83	8.92	0.1	6626232	7263902	7473250	3554790	5363891	4905795	162315	158286	175538	156661	183533	176184	0.0138105	72.4085	7121128	4.60816e+06	0.627915	1.54533	516258	5.86464e+06	656	6
	93	N6-Acetyl-L-lysine	94 N6-Acetyl-L-lysine	C8H16N2O3	[M+H]+	1.9	3.9	15	0.2	189.123	189.122	-8.8	S14409	3	2.98	3.05	0.07	48821410	48821410	48821410	48821410	48821410	48821410	17259462	14886605	17054746	15496781	16539716	16385510	NA	NA	48821410	48821410	0	1	48821410	48821410	0	0
	94	N-Acetylglutamic acid	95 N-Acetylglutamic acid	C7H11NO5	[M+H]+	10.3	12.3	15	0.2	190.071	190.071	-1.6	S14401	11.28	11.04	11.46	0.42	94660	106094	82318	49922	91606	84804	8307	5994	6823	6628	8825	7722	0.265509	3.76635	94357.3	75444	0.322728	1.25069	32149.5	84900.7	0	6
	95	N-Acetylglutamine	96 N-Acetylglutamine	C7H12N2O4	[M-H]-	6.8	8.8	15	0.2	187.072	187.072	-4.4	S14396	8.02	7.83	8.2	0.37	195732	143500	162732	78359	107442	109066	3012	1865	0	0	0	2856	0.0193043	51.802	167321	98289	0.76752	1.70234	13866.5	132805	12	6
	96	N-Acetyl-L-alanine	97 N-Acetyl-L-alanine	C5H9NO3	[M+H]+	6	7	15	0.2	132.065	132.065	-0.2	S14396	6.9	6.65	6.98	0.33	292079	280946	342012	156339	197216	219018	17213	25738	22648	19986	16539	26132	0.0121993	81.9717	305012	190858	0.67637	1.59811	74128	247935	32	6
	97	N-Acetyl-L-methionine	98 N-Acetyl-L-methionine	C7H13NO3S	[M+H]+	3	5	15	0.2	192.069	192.069	-1.5	S14396	4.76	4.51	4.96	0.44	31370	24219	29011	12974	20393	23476	0	0	0	0	0	0	0.0696466	14.3582	28200	18947.7	0.573675	1.48831	10000	23573.8	1	6
	98	N-Acetyl-L-phenylalanine	99 N-Acetyl-L-phenylalanine	C11H13NO3	[M+H]+	2.8	4	15	0.2	208.097	208.096	-1.5	S14410	3.32	3.26	3.32	0.06	1314822	1314822	1314822	1314822	1314822	1314822	467955	405430	461749	409983	446824	417703	NA	NA	1314822	1314822	0	1	1314822	1314822	0	0
	99	N-Acetylornithine	100 N-Acetylornithine	C7H14N2O3	[M+H]+	8.6	10.6	15	0.2	175.108	175.108	-0.7	S14396	9.78	9.67	9.93	0.26	583195	654224	760700	232575	500300	427830	6847	11140	9857	9085	6861	10042	0.04265	23.4466	666040	386902	0.783641	1.72147	36916	526471	21	6
	100	N-Acetylserine	101 N-Acetylserine	C5H9NO4	[M-H]-	7.5	8.5	15	0.2	146.046	146.045	-7.4	S14396	8.25	8.2	8.29	0.09	781998	599702	662019	363106	525138	579794	22611	19981	22706	20668	20723	20089	0.084955	11.7709	681240	489346	0.477308	1.39214	73389	585293	10	6
	101	NAD	102 NAD	C21H28N7O14P2	[Cat]+	9.9	11.9	15	0.2	664.116	664.116	-1.1	S14396	10.83	10.76	10.87	0.1	2067054	1434142	1613753	545689	735697	807808	0	0	4451	3987	0	3455	0.00778032	128.529	1704983	696398	1.29177	2.44829	15946.5	1.20069e+06	378	6
	102	NADH	103 NADH	C21H29N7O14P2	[M-H]-	9.5	11.5	15	0.2	664.117	664.108	-14.5	S14396	10.84	10.78	11.02	0.24	21022	13213	14921	10000	10000	12251	0	0	0	0	0	0	0.0860515	11.621	16385.3	10750.3	0.608024	1.52417	10000	13567.8	0	4
	103	NADP	104 NADP	C21H29N7O17P3	[Cat]+	12.7	14.7	15	0.2	744.083	744.083	0.1	S14396	13.52	13.43	13.73	0.3	10000	10000	10000	10000	10000	10000	0	0	0	0	0	0	NA	NA	10000	10000	0	1	10000	10000	0	0
	104	NADPH	105 NADPH	C21H30N7O17P3	[M-H]-	13	15	15	0.2	744.084	744.087	3.8	S14396	13.94	13.94	14.13	0.18	10000	10000	10000	10000	10000	10000	0	0	0	0	0	0	NA	NA	10000	10000	0	1	10000	10000	0	0
	105	Niacinamide	106 Niacinamide	C6H6N2O	[M+H]+	3.3	5.3	15	0.2	123.055	123.055	-0.7	S14396	4.52	4.46	4.55	0.09	187230048	204108784	246768208	95387736	182987504	156388032	416354	331090	1181418	703527	706611	457115	0.0970669	10.3022	2.12702e+08	1.44921e+08	0.553568	1.46771	1.90806e+06	1.78812e+08	2704	6
	106	Nicotinic acid	107 Nicotinic acid	C6H5NO2	[M-H]-	5.5	7.5	15	0.2	122.025	122.024	-8.6	S14394	5.7	5.48	5.94	0.46	75478	75478	75478	75478	75478	75478	23743	22832	20371	19219	22911	21880	NA	NA	75478	75478	0	1	75478	75478	0	0
	107	O-Phosphoethanolamine	108 O-Phosphoethanolamine	C2H8NO4P	[M+H]+	11.4	13.4	15	0.2	142.026	142.026	-0.5	S14396	12.49	12.49	12.74	0.25	2781226	1379572	2068746	746634	2102548	1703117	15585	5001	123307	32162	100838	26629	0.382641	2.61342	2.07651e+06	1517433	0.452531	1.36844	161761	1.79697e+06	6	6
	108	Ornithine	109 Ornithine	C5H12N2O2	[M+H]+	17	19	15	0.2	133.097	133.097	1.1	S14413	17.03	17	17.2	0.2	59279	59279	59279	59279	59279	59279	40747	15664	14285	8880	10866	8116	NA	NA	59279	59279	0	1	59279	59279	0	0
	109	Orotic acid	110 Orotic acid	C5H4N2O4	[M-H]-	6.7	8.7	15	0.2	155.01	155.009	-6.7	S14396	7.77	7.62	7.87	0.25	246513	177338	157256	46754	78825	72747	2490	3163	3165	2755	4716	2760	0.0113751	87.9114	193702	66108.7	1.55093	2.93006	19524.5	129906	33	6
	110	Orotidylic acid	111 Orotidylic acid	C10H13N2O11P	[M+H]+	0	30	15	0.2	369.033	369.038	12.8	S14423	2.77	2.7	2.89	0.18	125828	125828	125828	125828	125828	125828	55701	59771	52963	36160	27061	0	NA	NA	125828	125828	0	1	125828	125828	0	0
	111	Oxidized glutathione	112 Oxidized glutathione	C20H32N6O12S2	[M+H]+	13.5	15.5	15	0.2	613.159	613.159	-1.1	S14396	14.34	14.3	14.43	0.13	2492877	1388254	1952915	844144	1367058	1198289	58139	21232	111525	28975	106032	28204	0.0846116	11.8187	1944682	1136497	0.77494	1.71112	187054	1.54059e+06	31	6
	112	Oxoadipic acid	113 Oxoadipic acid	C6H8O5	[M-H]-	7.5	9.5	15	0.2	159.03	159.029	-6.3	S14423	7.55	7.55	7.62	0.07	27236	27236	27236	27236	27236	27236	5366	4773	6336	5954	5938	6105	NA	NA	27236	27236	0	1	27236	27236	0	0
	113	Oxoglutaric acid	114 Oxoglutaric acid	C5H6O5	[M-H]-	10.8	14.8	15	0.2	145.014	145.013	-7.9	S14396	12.55	12.47	12.61	0.13	1246723	582444	798340	353790	698901	410243	122454	119893	119042	110486	105823	109883	0.156593	6.38596	875836	487645	0.844829	1.79605	353790	681740	8	5
	114	Palmitic acid	115 Palmitic acid	C16H32O2	[M-H]-	1.6	3.6	15	0.2	255.233	255.232	-1.8	S14407	2.72	2.65	2.79	0.14	1999093	1999093	2905959	2374376	2545510	2408841	691087	739416	767927	485622	686998	607136	0.668524	1.49583	2.30138e+06	2442909	-0.0860999	0.942066	1999093	2.37215e+06	4	4
	115	Pantothenic acid	116 Pantothenic acid	C9H17NO5	[M+H]+	5.1	7.1	15	0.2	220.118	220.117	-2.5	S14396	6.38	6.21	6.45	0.24	52263604	44770996	49250212	22894160	35124272	28281826	12280	7052	9224	8247	10204	10700	0.00856901	116.7	48761604	2.87668e+07	0.761343	1.69507	38853.5	3.87642e+07	7668	6
	116	Phenol	117 Phenol	C6H6O	[M-H]-	2.1	4.1	15	0.2	93.0346	93.0334	-12.8	S14409	3.23	3.23	3.28	0.05	19109595	19109595	19109595	19109595	19109595	19109595	6824122	6085866	6206328	6601704	6191696	6289474	NA	NA	19109595	19109595	0	1	19109595	19109595	0	0
	117	Phosphocreatine	118 Phosphocreatine	C4H10N3O5P	[M-H]-	11.2	13.2	15	0.2	210.029	210.028	-3.5	S14396	12.03	11.96	12.13	0.16	17261	10000	10000	10000	10256	13490	0	0	0	0	0	0	0.683253	1.46359	12420.3	11248.7	0.14295	1.10416	10000	11834.5	0	3
	118	Phosphoenolpyruvic acid	119 Phosphoenolpyruvic acid	C3H5O6P	[M-H]-	13.6	15.6	15	0.2	166.975	166.974	-6	S14396	14.28	14.24	14.46	0.22	44768	20172.5	28262	20172.5	22366	20172.5	4325	2766	3510	3739	3423	2582	0.234864	4.25778	31067.5	20903.7	0.57165	1.48622	20172.5	25985.6	0	3
	119	Phosphoribosyl pyrophosphate	120 Phosphoribosyl pyrophosphate	C5H13O14P3	[M-H]-	15	18	15	0.2	388.945	388.942	-7.1	S14398	17.54	17.54	17.54	0	10000	10000	10000	10000	10000	10000	0	0	0	0	0	0	NA	NA	10000	10000	0	1	10000	10000	0	0
	120	Phosphorylcholine	121 Phosphorylcholine	C5H14NO4P	[M+H]+	10	13	15	0.2	184.073	184.073	-2.8	S14396	11.62	11.58	11.72	0.14	508797216	472039488	599140160	192551920	352924224	340223008	2699463	237796	6154199	1076817	4711066	756904	0.0222541	44.9356	5.26659e+08	2.95233e+08	0.835015	1.78388	7.82812e+06	4.10946e+08	32941	6
	121	Phosphoserine	122 Phosphoserine	C3H8NO6P	[M+H]+	11.5	13.5	15	0.2	186.016	186.016	-1.6	S14396	13.14	12.93	13.28	0.35	42454	15576.5	17947	15576.5	16960	15576.5	0	0	6440	2791	0	1922	0.341091	2.93177	25325.8	16037.7	0.659145	1.57915	15576.5	20681.8	0	3
	122	Pipecolic acid	123 Pipecolic acid	C6H11NO2	[M+H]+	7.5	9.5	15	0.2	130.086	130.086	-0.4	S14396	7.66	7.52	7.87	0.36	238468	279094	261769	152084	203022	182837	43950	36414	37467	36584	30418	30640	0.0131221	76.2074	259777	179314	0.534783	1.44872	117736	219546	24	6
	123	Propionylcarnitine	124 Propionylcarnitine	C10H19NO4	[M+H]+	5.2	7.2	15	0.2	218.139	218.138	-0.9	S14419	6.45	6.38	6.7	0.32	4448599	4046258	4809234	2384953	3669387	3463327	11710	11169	9002	9984	9702	9681	0.0501808	19.9279	4434697	3.17256e+06	0.48319	1.39783	40624	3.80363e+06	106	6
	124	Pyruvic acid	125 Pyruvic acid	C3H4O3	[M-H]-	5.5	7.5	15	0.2	87.0088	87.0077	-12.3	S14397	6.23	6.06	6.23	0.16	153182	170317	195648	153182	181914	153182	47241	48063	50177	47543	44097	49242	0.545957	1.83165	173049	162759	0.0884419	1.06322	153182	167904	0	3
	125	Ribose 1-phosphate	126 Ribose 1-phosphate	C5H11O8P	[M-H]-	11	12.4	15	0.2	229.012	229.011	-2.1	S14396	12.39	12.29	12.4	0.11	56333	37524	52263	21172	38704	24118	3310	0	3838	2232	2648	1855	0.0582135	17.1781	48706.7	27998	0.798795	1.73965	16941.5	38352.3	1	6
	126	Saccharopine	127 Saccharopine	C11H20N2O6	[M-H]-	11	14	15	0.2	275.125	275.128	12.5	S14417	11.63	11.63	11.87	0.24	10000	10000	10000	10000	10000	10000	0	0	0	0	0	0	NA	NA	10000	10000	0	1	10000	10000	0	0
	127	S-Adenosylhomocysteine	128 S-Adenosylhomocysteine	C14H20N6O5S	[M-H]-	8.6	10.6	15	0.2	383.114	383.114	0.2	S14396	9.7	9.64	9.76	0.12	17473	13414	18331	10000	11410	10000	0	0	0	0	0	0	0.0201362	49.6617	16406	10470	0.647962	1.56695	10000	13438	1	4
	128	S-Adenosylmethionine	129 S-Adenosylmethionine	C15H22N6O5S	[M+H]+	10.7	12.7	15	0.2	399.144	399.144	-2.3	S14396	11.91	11.77	12.09	0.32	1591450	1049620	1454205	472428	1390385	929584	43773	36310	120941	64376	46586	28428	0.234988	4.25554	1.36509e+06	930799	0.552456	1.46658	180207	1.14795e+06	7	6
	129	Sarcosine	130 Sarcosine	C3H7NO2	[M+H]+	11.2	12	15	0.2	90.055	90.0555	6	S14396	11.36	11.31	11.41	0.11	10204611	12072371	12979977	6123254	10191122	10160406	61278	53282	77758	62731	107293	69786	0.137305	7.28304	1.17523e+07	8.82493e+06	0.413289	1.33172	226064	1.02886e+07	100	6
	130	Succinic acid	131 Succinic acid	C4H6O4	[M-H]-	11.3	13.3	15	0.2	117.019	117.018	-9.7	S14396	12.17	12.13	12.21	0.07	1.01224e+06	1158971	1294927	1.01224e+06	1.01224e+06	1.01224e+06	353953	320805	331510	349420	331717	317082	0.154361	6.47831	1.15538e+06	1.01224e+06	0.190812	1.14141	1.01224e+06	1083812	8	2
	131	Taurine	132 Taurine	C2H7NO3S	[M-H]-	10.2	12.2	15	0.2	124.007	124.006	-10.4	S14394	11.46	11.29	11.48	0.19	63432796	72015584	75850248	44264652	59441180	61845332	26155	6790	34434	8558	46670	9980	0.082476	12.1247	70432876	5.51837e+07	0.352006	1.27633	76293.5	6.28083e+07	972	6
	132	Thymidine	133 Thymidine	C10H14N2O5	[M-H]-	3.5	5.5	15	0.2	241.083	241.083	-1.2	S14422	4.57	4.41	4.62	0.22	31612	31612	31612	31612	31612	31612	11390	14427	4218	3873	4360	4956	NA	NA	31612	31612	0	1	31612	31612	0	0
	133	Uracil	134 Uracil	C4H4N2O2	[M+H]+	5.4	7.4	15	0.2	113.035	113.035	3.9	S14399	6.68	6.52	6.92	0.4	29005	46951	48406	36397	31501	27029	5823	4586	5665	5614	6662	4782	0.222521	4.49395	41454	31642.3	0.389655	1.31008	26566	36548.2	0	6
	134	Ureidopropionic acid	135 Ureidopropionic acid	C4H8N2O3	[M-H]-	10.4	12.4	15	0.2	131.046	131.045	-9.3	S14396	11.44	11.37	11.52	0.15	1834389	1935696	2240282	1207608	1526371	1481586	43639	7392	45483	8205	44406	7285	0.0191246	52.2887	2.00346e+06	1.40519e+06	0.511727	1.42576	88205	1704322	127	6
	135	Ureidosuccinic acid	136 Ureidosuccinic acid	C5H8N2O5	[M-H]-	12.8	14.8	15	0.2	175.036	175.035	-5.4	S14401	13.65	13.6	13.7	0.1	698624	741791	565002	140657	222067	185588	0	0	0	0	0	0	0.0011262	887.943	668472	182771	1.87083	3.65744	10000	425622	1382	6
	136	Uric acid	137 Uric acid	C5H4N4O3	[M+H]+	8.8	10.8	15	0.2	169.036	169.037	10	S14397	10.72	10.72	10.72	0	10000	10000	10000	10000	10000	10000	0	0	0	0	0	0	NA	NA	10000	10000	0	1	10000	10000	0	0
	137	Uridine	138 Uridine	C9H12N2O6	[M-H]-	5.5	7.5	15	0.2	243.062	243.062	-1.1	S14399	6.67	6.57	6.9	0.32	154619	248076	260003	140477	147004	139226	4818	3081	5302	2642	5153	3790	0.078105	12.8033	220899	142236	0.635106	1.55305	22393	181568	4	6
	138	Uridine 5'-diphosphate	139 Uridine 5'-diphosphate	C9H14N2O12P2	[M+H]+	12.4	14.4	15	0.2	405.01	405.009	-1.7	S14396	13.25	13.21	13.31	0.11	186190	144771	179244	57487	108380	96796	2954	0	0	0	0	0	0.0146183	68.4075	170068	87554.3	0.957864	1.94243	11477	128811	17	6
	139	Uridine 5'-monophosphate	140 Uridine 5'-monophosphate	C9H13N2O9P	[M-H]-	11.2	13.2	15	0.2	323.029	323.028	-0.6	S14396	12.07	11.97	12.15	0.18	991765	836872	1213004	525550	775586	644839	54774	15654	54571	23441	40574	18448	0.0492691	20.2967	1.01388e+06	648658	0.644357	1.56304	113731	831269	26	6
	140	Uridine diphosphate glucose	141 Uridine diphosphate glucose	C15H24N2O17P2	[M-H]-	12.4	14.4	15	0.2	565.048	565.048	1	S14396	13.26	13.2	13.29	0.09	1089289	493212	745188	172349	334733	300144	0	0	0	0	0	0	0.0477916	20.9242	775896	269075	1.52785	2.88357	10000	522486	32	6
	141	Uridine diphosphate-N-acetylglucosamine	142 Uridine diphosphate-N-acetylglucosamine	C17H27N3O17P2	[M+H]+	11.2	13.2	15	0.2	608.089	608.088	-1.2	S14396	12.16	12.07	12.17	0.09	401641	350155	387381	162598	258612	241888	0	0	0	0	0	0	0.00891966	112.112	379726	221033	0.780698	1.71796	10000	300379	58	6
	142	Uridine triphosphate	143 Uridine triphosphate	C9H15N2O15P3	[M-H]-	15	18	15	0.2	482.961	482.962	0.7	S14396	15.02	15.01	15.26	0.25	10000	10000	10000	10000	10000	10000	0	0	0	0	0	0	NA	NA	10000	10000	0	1	10000	10000	0	0
	143	Valerylcarnitine	144 Valerylcarnitine	C12H23NO4	[M+H]+	3.6	5.7	15	0.2	246.17	246.169	-2	S14396	4.87	4.64	5.05	0.41	1108612	764173	826764	421205	654724	633354	8520	8412	9578	6473	7779	8104	0.0634115	15.77	899850	569761	0.659327	1.57935	34433	734805	18	6
	144	Xanthine	145 Xanthine	C5H4N4O2	[M-H]-	7.5	9.4	15	0.2	151.026	151.025	-6.3	S14397	8.59	8.54	8.66	0.11	566532	459368	499463	346011	405429	402215	10513	9638	10300	9473	10101	10725	0.0279681	35.7551	508454	384552	0.402941	1.3222	40375	446503	21	6
	145	Xanthosine	146 Xanthosine	C10H12N4O6	[M-H]-	6.7	8.7	15	0.2	283.068	283.068	0	S14413	7.73	7.53	7.73	0.21	10897.5	10897.5	10897.5	10897.5	10897.5	10897.5	0	0	1795	0	0	0	NA	NA	10897.5	10897.5	0	1	10897.5	10897.5	0	0
	146	Xanthylic acid	147 Xanthylic acid	C10H13N4O9P	[M-H]-	11	13	15	0.2	363.035	363.035	0.4	S14415	11.16	11.16	11.16	0	10000	10000	10000	10000	10000	10000	0	0	0	0	0	0	NA	NA	10000	10000	0	1	10000	10000	0	0
[truncated: 261 more columns]
