# Supplementary material for: Orai3 and Orai1 mediate CRAC channel function and metabolic reprogramming in B cells
Source: eLife. 2023 Feb 21;12:e84708. doi: 10.7554/eLife.84708 (PMC9998091; doi:10.7554/eLife.84708)
Supplement: Figure 9—source data 1. [file elife-84708-fig9-data1.xlsx]

## Sheet: Sheet1
Figure 9A
		Metabolite	Formula	Ion Type	mz	ppm	RT	RT_range	Detection	Skeleton_Metabolite	WT1 NS	WT1 IgM	WT1 Both	WT1 FK506	WT1 GSK	WT2 NS	WT2 IgM	WT2 Both	WT2 FK506	WT2 GSK	WT3 NS	WT3 IgM	WT3 Both	WT3 FK506	WT3 GSK	WTBoth_vs_WTFK506_ttest_pval	WTBoth_vs_WTFK506_Log2FoldChange	WTBoth_vs_WTFK506_impact_score	WTBoth_vs_WTGSK_ttest_pval	WTBoth_vs_WTGSK_Log2FoldChange	WTBoth_vs_WTGSK_impact_score	WTBoth_vs_WTIgM_ttest_pval	WTBoth_vs_WTIgM_Log2FoldChange	WTBoth_vs_WTIgM_impact_score	WTBoth_vs_WTNS_ttest_pval	WTBoth_vs_WTNS_Log2FoldChange	WTBoth_vs_WTNS_impact_score	WTFK506_vs_WTBoth_ttest_pval	WTFK506_vs_WTBoth_Log2FoldChange	WTFK506_vs_WTBoth_impact_score	WTFK506_vs_WTGSK_ttest_pval	WTFK506_vs_WTGSK_Log2FoldChange	WTFK506_vs_WTGSK_impact_score	WTFK506_vs_WTIgM_ttest_pval	WTFK506_vs_WTIgM_Log2FoldChange	WTFK506_vs_WTIgM_impact_score	WTFK506_vs_WTNS_ttest_pval	WTFK506_vs_WTNS_Log2FoldChange	WTFK506_vs_WTNS_impact_score
	0	1 1-Methylnicotinamide	C7H8N2O	[M+H]+	137.071	-0.3	20.76	0.49	0	1-Methylnicotinamide	-	-	-	-	-	-	-	-	-	-	-	-	-	-	-	NA	0	0	NA	0	0	NA	0	0	NA	0	0	NA	0	0	NA	0	0	NA	0	0	NA	0	0
	1	2 2,3-Diphosphoglyceric acid	C3H8O10P2	[M-H]-	264.952	0	12.99	0	0	2,3-Diphosphoglyceric acid	-	-	-	-	-	-	-	-	-	-	-	-	-	-	-	NA	0	0	NA	0	0	NA	0	0	NA	0	0	NA	0	0	NA	0	0	NA	0	0	NA	0	0
	2	3 3-Hydroxybutyric acid	C4H8O3	[M-H]-	103.04	-10.4	6.07	0.17	0	3-Hydroxybutyric acid	-	-	-	-	-	-	-	-	-	-	-	-	-	-	-	NA	0	0	NA	0	0	NA	0	0	NA	0	0	NA	0	0	NA	0	0	NA	0	0	NA	0	0
	3	4 3-Phosphoglyceric acid	C3H7O7P	[M-H]-	184.986	-4.1	13.76	0.41	4	3-Phosphoglyceric acid	-	25557	79384	-	-	-	-	-	-	-	-	-	21637	16552	-	0.317868	1.40502	0	0.29856	1.51762	0	0.38324	1.13171	0	0.29856	1.51762	0	0.317868	-1.40502	0	0.373901	0.112602	0	0.51644	-0.273312	0	0.373901	0.112602	0
	4	5 4,5-Dihydroorotic acid	C5H6N2O4	[M-H]-	157.025	-6.9	8.59	0.34	19	4,5-Dihydroorotic acid	-	176153	1717312	19789	31584	-	35339	561759	-	15776	-	42597	1538214	21083	-	0.0250619	6.12225	1794	0.0252074	5.96082	1597	0.0304667	3.90914	335	0.0247875	6.51356	2371	0.0250619	-6.12225	1794	0.737572	-0.161432	0	0.22079	-2.21311	1	0.120032	0.391303	0
	5	6 4-Hydroxyproline	C5H9NO3	[M+H]+	132.065	3.6	10.67	0.3	30	4-Hydroxyproline	35382136	94213568	169859824	45247876	62222568	30858656	90345704	129113000	34955832	53692520	30514952	95260488	114055168	34781744	49891484	0.00429734	1.84479	73558	0.0084634	1.31674	28395	0.0567918	0.561742	3001	0.00325045	2.09382	111582	0.00429734	-1.84479	73558	0.0280362	-0.52805	2407	0.000128791	-1.28305	1243314	0.184942	0.249032	227
	6	7 5'-Methylthioadenosine	C11H15N5O3S	[M+H]+	298.097	-2.5	4.18	0.2	27	5'-Methylthioadenosine	286442	1645664	4130317	317572	521289	261212	1056889	1982220	245649	288096	256283	1703918	2470775	251312	383910	0.0163884	3.39749	1007	0.0196237	2.84658	597	0.110813	0.961911	38	0.0162858	3.41638	1026	0.0163884	-3.39749	1007	0.152197	-0.550906	3	0.00451249	-2.43558	1043	0.894084	0.0188907	0
	7	8 5-Phosphoribosylamine	C5H12NO7P	[M-H]-	228.028	-2.5	11.62	0	0	5-Phosphoribosylamine	-	-	-	-	-	-	-	-	-	-	-	-	-	-	-	NA	0	0	NA	0	0	NA	0	0	NA	0	0	NA	0	0	NA	0	0	NA	0	0	NA	0	0
	8	9 6-Phosphogluconic acid	C6H13O10P	[M-H]-	275.017	3.8	14.66	0.23	0	6-Phosphogluconic acid	-	-	-	-	-	-	-	-	-	-	-	-	-	-	-	NA	0	0	NA	0	0	NA	0	0	NA	0	0	NA	0	0	NA	0	0	NA	0	0	NA	0	0
	9	10 Acetoacetic acid	C4H6O3	[M-H]-	101.024	-11.1	9.57	0.46	30	Acetoacetic acid	429622	215488	356886	215425	144127	342543	189239	241908	181182	123073	317929	201100	241083	158717	111590	0.0860589	0.596848	4	0.0178624	1.14878	25	0.11746	0.471272	3	0.179036	-0.376203	2	0.0860589	-0.596848	4	0.0365659	0.551932	6	0.406166	-0.125576	1	0.00909925	-0.973051	59
	10	11 Acetyl-CoA	C23H38N7O17P3S	[M+H]+	810.133	-8.1	9.56	0.44	3	Acetyl-CoA	-	-	27943	-	-	-	10610	-	-	-	-	-	31889	-	-	0.120006	1.21893	0	0.120006	1.21893	0	0.12436	1.18989	0	0.120006	1.21893	0	0.120006	-1.21893	0	NA	0	0	0.373901	-0.0290405	0	NA	0	0
	11	12 Acetylcysteine	C5H9NO3S	[M+H]+	164.038	-0.6	7.2	0.28	30	Acetylcysteine	70621	85404	120082	49058	37750	112498	72964	148033	35133	17331	83484	98935	227261	44291	24966	0.0194428	1.94696	21	0.0132565	2.6296	45	0.0737558	0.945056	3	0.0909684	0.893831	3	0.0194428	-1.94696	21	0.089101	0.682647	1	0.00734373	-1.0019	18	0.0242241	-1.05313	6
	12	13 Adenine	C5H5N5	[M+H]+	136.062	-1.3	6.15	0.13	30	Adenine	24043622	26811068	46131828	20606042	19637622	25507352	32900122	40154232	20449594	25563658	28349566	41221736	44624096	17325788	21787896	0.000318262	1.165	222277	0.00103074	0.966577	62534	0.0928489	0.37518	540	0.00129347	0.748872	45214	0.000318262	-1.165	222277	0.231359	-0.198419	104	0.0302128	-0.789816	1519	0.0170849	-0.416124	1774
	13	14 Adenosine	C10H13N5O4	[M+H]+	268.104	-2.7	5.81	0.2	30	Adenosine	43731632	47167076	58138084	32230046	29607466	28208536	61802288	73587744	32043432	32499216	35215176	64877084	67081708	22559110	37770340	0.00246177	1.19506	44276	0.00289564	0.993148	34220	0.304168	0.193559	234	0.00853252	0.891669	11088	0.00246177	-1.19506	44276	0.336872	-0.201916	106	0.0101567	-1.00151	8564	0.286134	-0.303395	139
	14	15 Adenosine diphosphate ribose	C15H23N5O14P2	[M-H]-	558.064	1.6	11.73	0.09	30	Adenosine diphosphate ribose	530812	462185	1054224	351202	434271	486881	522087	596982	309786	345542	694539	694680	550175	418643	226398	0.0846369	1.02787	13	0.0811031	1.12948	14	0.376595	0.390848	2	0.398698	0.362531	2	0.0846369	-1.02787	13	0.737359	0.101605	1	0.0594886	-0.637023	12	0.0406351	-0.66534	18
	15	16 Adenosine monophosphate	C10H14N5O7P	[M+H]+	348.07	-2.5	10.73	0.28	30	Adenosine monophosphate	9222990	17438130	27342494	10485212	8894065	11937555	12230496	15872592	10408529	9625090	13219836	16324308	19262602	10756226	9261627	0.0392009	0.981137	790	0.0274526	1.16925	1232	0.216949	0.441929	113	0.0599622	0.861756	489	0.0392009	-0.981137	790	0.00544553	0.188117	2072	0.0394305	-0.539208	477	0.484578	-0.119382	25
	16	17 Adenosine triphosphate	C10H16N5O13P3	[M-H]-	505.988	0.8	13.3	0.35	5	Adenosine triphosphate	-	22535	182302	20058	-	-	-	-	-	-	-	-	27375	-	-	0.342438	2.067	1	0.334918	2.1503	1	0.348798	2.00242	1	0.334918	2.1503	1	0.342438	-2.067	1	0.373901	0.0833032	0	0.713948	-0.0645836	0	0.373901	0.0833032	0
	17	18 Adenylsuccinic acid	C14H18N5O11P	[M-H]-	462.067	0.7	15.1	0	0	Adenylsuccinic acid	-	-	-	-	-	-	-	-	-	-	-	-	-	-	-	NA	0	0	NA	0	0	NA	0	0	NA	0	0	NA	0	0	NA	0	0	NA	0	0	NA	0	0
	18	19 ADP	C10H15N5O10P2	[M-H]-	426.022	0.4	11.94	0.46	17	ADP	-	61392	535610	30037	27258	34448	-	36093	32755	-	-	29695	92295	31376	-	0.295533	2.81787	3	0.284146	3.08373	4	0.313472	2.50939	2	0.28933	2.95701	3	0.295533	-2.81787	3	0.00558617	0.265856	6	0.54574	-0.308482	0	0.400988	0.139144	0
	19	20 Allantoin	C4H6N4O3	[M-H]-	157.037	-6.5	10.4	0.26	30	Allantoin	425646	439870	879160	436886	275888	333854	463767	399457	431723	368256	405528	513170	641664	482510	201390	0.2452	0.507163	3	0.0709868	1.18338	15	0.297241	0.438674	3	0.149292	0.720953	6	0.2452	-0.507163	3	0.0296069	0.67622	20	0.462089	-0.0684885	1	0.126277	0.21379	4
	20	21 Aminoadipic acid	C6H11NO4	[M-H]-	160.061	-6.5	7.26	0.15	30	Aminoadipic acid	206456	265007	454988	171693	150099	210496	200901	317132	139923	107712	194436	242257	332135	135383	114904	0.00831592	1.30473	77	0.00589004	1.56693	124	0.0499223	0.640916	9	0.0201283	0.852913	26	0.00831592	-1.30473	77	0.227302	0.262199	1	0.0166355	-0.663814	18	0.0115151	-0.451817	21
	21	22 Argininosuccinic acid	C10H18N4O6	[M-H]-	289.115	-0.6	13.37	0.1	20	Argininosuccinic acid	13724	50037	160664	20080	23211	13124	27584	80927	16683	-	-	35483	85573	14557	12622	0.0237654	2.67242	17	0.023224	2.80452	19	0.0554525	1.53236	4	0.0202907	3.11186	26	0.0237654	-2.67242	17	0.736787	0.132104	0	0.0383198	-1.14006	2	0.0679639	0.439438	0
	22	23 Beta-Alanine	C3H7NO2	[M+H]+	90.055	6	10.22	0.15	29	Beta-Alanine	266868	699153	1495918	422942	740642	161476	840878	1238035	303440	601197	163125	896678	1083256	282795	558193	0.00186248	1.91934	1634	0.00847181	1.00649	226	0.0264055	0.647584	62	0.00101311	2.69014	4681	0.00186248	-1.91934	1634	0.0134267	-0.912844	68	0.00289544	-1.27175	479	0.0673853	0.770805	7
	23	24 Betaine	C5H11NO2	[M+H]+	118.086	2.1	7.82	0.09	30	Betaine	97885888	75313024	136101856	58995720	44698884	66046132	69174448	92815208	41935948	34894248	75662768	80137064	96229928	41427808	35882036	0.0154831	1.19155	11494	0.00799768	1.49351	25855	0.0784274	0.533577	1691	0.164681	0.440496	776	0.0154831	-1.19155	11494	0.243721	0.301956	217	0.0141128	-0.657977	6838	0.0427401	-0.751058	2507
	24	25 Butyrylcarnitine	C11H21NO4	[M+H]+	232.154	-1.4	5.6	0.45	30	Butyrylcarnitine	3632702	3559095	7556898	2001836	1517084	2669639	2931355	5174206	1534176	1094848	2270214	2879622	4772499	1194988	957292	0.00909599	1.88743	1507	0.00630745	2.29397	2731	0.038935	0.90152	215	0.0360072	1.02985	246	0.00909599	-1.88743	1507	0.250237	0.406535	7	0.00844655	-0.985915	551	0.051846	-0.85758	77
	25	26 Carbamoyl phosphate	CH4NO5P	[M-H]-	139.975	-6.7	27.14	0.35	0	Carbamoyl phosphate	-	-	-	-	-	-	-	-	-	-	-	-	-	-	-	NA	0	0	NA	0	0	NA	0	0	NA	0	0	NA	0	0	NA	0	0	NA	0	0	NA	0	0
	26	27 Carnosine	C9H14N4O3	[M+H]+	227.114	-1.6	11.62	0.16	29	Carnosine	142482	70596	-	173318	94628	89570	88839	62056	89788	63857	92065	119944	80621	118123	57060	0.0772991	-1.29865	3	0.437681	-0.475977	0	0.172126	-0.850211	1	0.102345	-1.0645	2	0.0772991	1.29865	3	0.111318	0.822669	2	0.298581	0.448434	1	0.559889	0.234143	0
	27	28 CDP	C9H15N3O11P2	[M+H]+	404.026	-1.1	13.8	0.23	1	CDP	-	-	29905	-	-	-	-	-	-	-	-	-	-	-	-	0.373901	0.457952	0	0.373901	0.457952	0	0.373901	0.457952	0	0.373901	0.457952	0	0.373901	-0.457952	0	NA	0	0	NA	0	0	NA	0	0
	28	29 Choline	C5H14NO	[Cat]+	104.107	2	12.79	0.19	30	Choline	140213072	65341700	96056392	66896632	55507172	88197888	137643984	184779936	56774512	70668096	97574600	132707872	95998408	51758176	59128064	0.0882276	1.10304	2241	0.0999009	1.02404	1907	0.734257	0.166787	182	0.640815	0.209124	211	0.0882276	-1.10304	2241	0.633197	-0.0789989	100	0.0876448	-0.936255	1860	0.0391361	-0.893918	3968
	29	30 cis-Aconitic acid	C6H6O6	[M-H]-	173.009	-5.6	14.84	0.11	30	cis-Aconitic acid	920001	2839788	4722035	1705254	1373133	1256946	1801594	2660146	776976	304007	1034683	2416500	3289736	905883	599583	0.0228885	1.65527	322	0.0152785	2.22879	662	0.151369	0.596512	30	0.0158161	1.73244	486	0.0228885	-1.65527	322	0.438654	0.573523	3	0.0431136	-1.05875	84	0.857245	0.0771763	1
	30	31 Citric acid	C6H8O7	[M-H]-	191.02	-4.9	15.33	0.41	25	Citric acid	-	3710862	11478462	710731	506178	257028	166909	899740	853655	156219	145882	752118	3436092	916880	-	0.235901	2.67208	82	0.190805	4.39134	304	0.330927	1.77218	35	0.184563	5.00032	471	0.235901	-2.67208	82	0.0156102	1.71926	114	0.549999	-0.899901	4	0.00105912	2.32824	2351
	31	32 Citrulline	C6H13N3O3	[M+H]+	176.103	-0.4	11.92	0.1	30	Citrulline	1425763	1799087	2260911	2400608	1930799	809983	1694810	1957449	1269781	1643327	773178	1494180	1999898	2101582	960167	0.693779	0.107446	3	0.137666	0.455633	18	0.0346992	0.318027	67	0.00994009	1.04726	320	0.693779	-0.107446	3	0.405575	0.348186	5	0.49674	0.21058	4	0.0822163	0.939816	34
	32	33 Creatine	C4H9N3O2	[M+H]+	132.077	-2.7	10.72	0.09	30	Creatine	114426496	62184920	91949816	54298624	39389676	90234504	56365508	72353816	46626404	37184528	88216416	61245104	76823696	51508672	40622540	0.009561	0.661613	10852	0.00235246	1.04086	52232	0.0299675	0.423438	3140	0.169245	-0.280502	639	0.009561	-0.661613	10852	0.00877561	0.379249	6660	0.0338707	-0.238175	1928	0.005798	-0.942115	24595
	33	34 Creatinine	C4H7N3O	[M+H]+	114.066	1.9	6.47	0.09	30	Creatinine	19661954	19596748	34187284	17512098	14024824	16249593	19331724	25005288	12385026	11242196	16797050	21959740	26870860	11997194	11630251	0.0113581	1.03865	3857	0.00503806	1.22189	9488	0.0454639	0.499237	761	0.0206151	0.707362	1832	0.0113581	-1.03865	3857	0.447295	0.18324	33	0.0321542	-0.539408	774	0.156318	-0.331284	127
	34	35 Cyclic AMP	C10H12N5O6P	[M-H]-	328.045	0.5	6.95	0.15	30	Cyclic AMP	37975	43129	57841	27910	23486	38155	35114	60067	23239	18576	34291	42228	53169	17008	20831	0.000796832	1.32771	126	0.000129852	1.44367	817	0.00655334	0.50596	11	0.00107148	0.631631	68	0.000796832	-1.32771	126	0.638934	0.115962	0	0.0125827	-0.821752	4	0.0143298	-0.696081	3
	35	36 Cytidine	C9H13N3O5	[M+H]+	244.093	-0.8	8.28	0.39	30	Cytidine	653725	429597	746690	658248	372091	730478	811657	1078209	540302	407244	705208	902783	668055	514989	412136	0.122901	0.540877	8	0.0264237	1.06511	49	0.577075	0.217526	2	0.351571	0.25476	3	0.122901	-0.540877	8	0.0192597	0.524235	36	0.397235	-0.323351	2	0.0648845	-0.286117	12
	36	37 Cytidine monophosphate	C9H14N3O8P	[M+H]+	324.059	-2.6	12.97	0.25	26	Cytidine monophosphate	131165	187934	503395	128667	112060	143094	132947	264328	91184	85210	151849	216570	288848	95328	102454	0.0324165	1.74515	24	0.0297991	1.81768	27	0.0959759	0.975185	5	0.0508994	1.3101	12	0.0324165	-1.74515	24	0.735623	0.0725368	0	0.0530676	-0.769962	5	0.0497294	-0.435048	3
	37	38 Cytidine triphosphate	C9H16N3O14P3	[M-H]-	481.977	2.6	15.29	0.23	0	Cytidine triphosphate	-	-	-	-	-	-	-	-	-	-	-	-	-	-	-	NA	0	0	NA	0	0	NA	0	0	NA	0	0	NA	0	0	NA	0	0	NA	0	0	NA	0	0
	38	39 Cytosine	C4H5N3O	[M+H]+	112.05	2.3	9.32	0.43	0	Cytosine	-	-	-	-	-	-	-	-	-	-	-	-	-	-	-	NA	0	0	NA	0	0	NA	0	0	NA	0	0	NA	0	0	NA	0	0	NA	0	0	NA	0	0
	39	40 D-2-Hydroxyglutaric acid	C5H8O5	[M-H]-	147.03	-6.8	12.19	0.09	30	D-2-Hydroxyglutaric acid	1727479	2362282	4659738	1844658	1567260	1331443	2015350	3425057	1856844	1511060	1592085	2642044	3616392	1692121	1222399	0.00558535	1.11733	1107	0.00345415	1.44401	2101	0.0212491	0.737179	245	0.00422693	1.33104	1622	0.00558535	-1.11733	1107	0.0378434	0.326677	54	0.0454607	-0.38015	59	0.124662	0.213712	16
	40	41 D-Glucose	C6H12O6	[M-H]-	179.056	-4.5	10.98	0.28	30	D-Glucose	237356	234614	218624	507379	322338	267869	274297	244099	251920	275868	309576	269428	153660	383354	279260	0.0891896	-0.890488	6	0.0475569	-0.509516	7	0.143084	-0.336572	2	0.124467	-0.402621	3	0.0891896	0.890488	6	0.305309	0.380972	1	0.179832	0.553917	3	0.227168	0.487868	2
	41	42 D-Glyceraldehyde 3-phosphate	C3H7O6P	[M-H]-	168.991	-6.8	13.01	0.24	1	D-Glyceraldehyde 3-phosphate	-	-	22478	-	-	-	-	-	-	-	-	-	-	-	-	0.373901	0.501753	0	0.373901	0.501753	0	0.373901	0.501753	0	0.373901	0.501753	0	0.373901	-0.501753	0	NA	0	0	NA	0	0	NA	0	0
	42	43 Dihydrofolic acid	C19H21N7O6	[M+H]+	444.163	8.8	13	0.23	0	Dihydrofolic acid	-	-	-	-	-	-	-	-	-	-	-	-	-	-	-	NA	0	0	NA	0	0	NA	0	0	NA	0	0	NA	0	0	NA	0	0	NA	0	0	NA	0	0
	43	44 Dihydroxyacetone phosphate	C3H7O6P	[M-H]-	168.991	-5.6	12.88	0.33	4	Dihydroxyacetone phosphate	-	12106	69714	-	-	-	-	-	-	-	-	-	21326	-	-	0.265575	1.75189	0	0.265575	1.75189	0	0.278148	1.65401	0	0.265575	1.75189	0	0.265575	-1.75189	0	NA	0	0	0.373901	-0.0978804	0	NA	0	0
	44	45 D-Ribose 5-phosphate	C5H11O8P	[M-H]-	229.012	-2.5	12.61	0.21	28	D-Ribose 5-phosphate	37074	132588	251408	85270	65884	57423	68434	100949	64357	44071	69441	93494	131402	87704	33046	0.152197	1.02739	2	0.0727343	1.75826	5	0.272156	0.715942	1	0.085383	1.56114	4	0.152197	-1.02739	2	0.0610304	0.730875	2	0.39631	-0.311445	0	0.111232	0.53375	1
	45	46 D-Sedoheptulose 7-phosphate	C7H15O10P	[M-H]-	289.033	0	13.03	0.28	8	D-Sedoheptulose 7-phosphate	-	16581	46841	-	-	-	-	19421	-	-	-	12653	30336	-	-	0.055096	1.5732	1	0.055096	1.5732	1	0.0817784	1.27001	1	0.055096	1.5732	1	0.055096	-1.5732	1	NA	0	0	0.210611	-0.303186	0	NA	0	0
	46	47 dTDP	C10H16N2O11P2	[M-H]-	401.016	-5.6	12.08	0.25	0	dTDP	-	-	-	-	-	-	-	-	-	-	-	-	-	-	-	NA	0	0	NA	0	0	NA	0	0	NA	0	0	NA	0	0	NA	0	0	NA	0	0	NA	0	0
	47	48 FAD	C27H33N9O15P2	[M+H]+	786.164	-4.2	8.67	0.33	24	FAD	14024	21411	39331	16554	12052	18971	18517	20361	15640	-	16641	23863	32769	12258	-	0.048768	1.0566	1	0.0228972	1.52843	3	0.17317	0.535492	0	0.0677934	0.897458	1	0.048768	-1.0566	1	0.0486799	0.471834	0	0.0333479	-0.521105	1	0.422579	-0.159139	0
	48	49 Folic acid	C19H19N7O6	[M+H]+	442.147	-1.9	13.72	0.23	0	Folic acid	-	-	-	-	-	-	-	-	-	-	-	-	-	-	-	NA	0	0	NA	0	0	NA	0	0	NA	0	0	NA	0	0	NA	0	0	NA	0	0	NA	0	0
	49	50 Fructose 1,6-bisphosphate	C6H14O12P2	[M-H]-	338.989	0.1	14.77	0.34	0	Fructose 1,6-bisphosphate	-	-	-	-	-	-	-	-	-	-	-	-	-	-	-	NA	0	0	NA	0	0	NA	0	0	NA	0	0	NA	0	0	NA	0	0	NA	0	0	NA	0	0
	50	51 Fructose 6-phosphate	C6H13O9P	[M-H]-	259.022	-1	13.49	0.05	29	Fructose 6-phosphate	39500	129759	223872	109949	112489	97703	86231	97345	94877	39361	97280	134995	154431	151297	39225	0.378638	0.417519	0	0.097196	1.31576	3	0.354467	0.438485	1	0.123971	1.02041	2	0.378638	-0.417519	0	0.137215	0.898237	1	0.943916	0.0209662	0	0.189142	0.602892	1
	51	52 Fumaric acid	C4H4O4	[M-H]-	115.004	-10.3	12.96	0.15	30	Fumaric acid	503002	1476192	5904062	1001516	1308848	710596	1599915	3714198	1091258	677496	575296	1455428	3640518	845797	1093716	0.00994524	2.17376	1225	0.0113924	2.10592	1029	0.0173859	1.54888	499	0.00683022	2.88981	2721	0.00994524	-2.17376	1225	0.824042	-0.0678437	1	0.00330568	-0.624885	581	0.0151585	0.716047	85
	52	53 Glucose 6-phosphate	C6H13O9P	[M-H]-	259.022	-1	13.6	0.1	30	Glucose 6-phosphate	47271	100264	192806	100898	115841	106360	90087	118194	84573	44490	132354	160857	106376	170074	64389	0.613359	0.231315	0	0.1354	0.893219	1	0.562028	0.249022	0	0.301568	0.545408	1	0.613359	-0.231315	0	0.265853	0.661904	1	0.968378	0.0177065	0	0.558123	0.314093	0
	53	54 Glutathione	C10H17N3O6S	[M+H]+	308.091	-1.9	11.45	0.49	1	Glutathione	-	-	74196	-	-	-	-	-	-	-	-	-	-	-	-	0.373901	0.359947	0	0.373901	0.359947	0	0.373901	0.359947	0	0.373901	0.359947	0	0.373901	-0.359947	0	NA	0	0	NA	0	0	NA	0	0
	54	55 Glycerol 3-phosphate	C3H9O6P	[M-H]-	171.006	-5.9	11.86	0.22	30	Glycerol 3-phosphate	388675	565060	1147476	504958	405260	369637	393248	645681	414282	270150	392249	600253	697000	406771	356379	0.0753252	0.909144	16	0.0415481	1.27109	34	0.144877	0.676022	7	0.0488818	1.1139	27	0.0753252	-0.909144	16	0.124368	0.361945	4	0.33813	-0.233122	2	0.144656	0.204755	3
	55	56 Glycine	C2H5NO2	[M+H]+	76.0393	9.1	11.73	0.09	30	Glycine	4046332	4860406	6178646	5668544	4877841	3136616	5939952	6831492	5031516	5200625	3528022	5777356	5370010	4939846	4832742	0.130279	0.232917	51	0.0576826	0.301751	119	0.328225	0.148903	20	0.00682656	0.779059	1219	0.130279	-0.232917	51	0.397726	0.0688347	13	0.485019	-0.0840132	12	0.00927194	0.546143	692
	56	57 Guanidoacetic acid	C3H7N3O2	[M+H]+	118.061	2.5	11.69	0.1	30	Guanidoacetic acid	997828	542089	811396	1117072	667839	473968	471578	521949	619428	562230	432050	447367	570228	546721	355291	0.561916	-0.262361	1	0.454593	0.263899	2	0.19139	0.38172	4	0.999664	-0.000206889	1	0.561916	0.262361	1	0.312322	0.52626	3	0.205501	0.644081	5	0.646523	0.262154	1
	57	58 Guanine	C5H5N5O	[M+H]+	152.057	-1.2	8.51	0.19	30	Guanine	1065696	1256120	1999087	1196514	866404	1160464	1417852	1532055	1191058	1856571	1429489	1849981	1832605	1279268	1244176	0.0154551	0.548704	142	0.218509	0.435138	10	0.279213	0.245657	7	0.031151	0.553114	71	0.0154551	-0.548704	142	0.747266	-0.113566	2	0.186751	-0.303047	9	0.975167	0.00440976	1
	58	59 Guanosine	C10H13N5O5	[M+H]+	284.099	-2.6	8.87	0.17	30	Guanosine	153563	202802	394584	203494	154171	207604	264989	364187	147653	181660	201296	303666	349365	108776	142895	0.00210649	1.26867	299	0.00028352	1.21086	2159	0.0253631	0.522477	18	0.00109602	0.978305	500	0.00210649	-1.26867	299	0.843703	-0.0578078	0	0.0612612	-0.746193	6	0.350323	-0.290366	1
	59	60 Guanosine diphosphate	C10H15N5O11P2	[M-H]-	442.017	0.1	14.79	0.24	1	Guanosine diphosphate	-	-	16760	-	-	-	-	-	-	-	-	-	-	-	-	0.373901	0.118553	0	0.373901	0.118553	0	0.373901	0.118553	0	0.373901	0.118553	0	0.373901	-0.118553	0	NA	0	0	NA	0	0	NA	0	0
	60	61 Guanosine monophosphate	C10H14N5O8P	[M+H]+	364.065	-2.1	13.43	0.17	19	Guanosine monophosphate	-	217776	435571	162367	106433	129644	111477	155780	125693	-	135598	155447	238481	118838	-	0.16891	1.02815	2	0.09906	1.48516	5	0.263622	0.775727	1	0.135673	1.20387	3	0.16891	-1.02815	2	0.0586279	0.45701	3	0.48411	-0.252425	0	0.448184	0.175721	0
	61	62 Guanosine triphosphate	C10H16N5O14P3	[M-H]-	521.983	1.4	16.8	0.26	0	Guanosine triphosphate	-	-	-	-	-	-	-	-	-	-	-	-	-	-	-	NA	0	0	NA	0	0	NA	0	0	NA	0	0	NA	0	0	NA	0	0	NA	0	0	NA	0	0
	62	63 Homocysteine	C4H9NO2S	[M-H]-	134.028	-9.1	8.56	0.2	0	Homocysteine	-	-	-	-	-	-	-	-	-	-	-	-	-	-	-	NA	0	0	NA	0	0	NA	0	0	NA	0	0	NA	0	0	NA	0	0	NA	0	0	NA	0	0
	63	64 Hypotaurine	C2H7NO2S	[M+H]+	110.027	2.5	11.12	0.09	30	Hypotaurine	2955597	2491912	4342560	1478195	1317441	2112794	2188896	3349581	871717	917390	1997759	3141020	3818249	1490722	563659	0.00191081	1.58352	4013	0.00128397	2.04022	7640	0.0375467	0.557359	126	0.0236422	0.70394	213	0.00191081	-1.58352	4013	0.309293	0.456696	5	0.0187569	-1.02616	211	0.0419981	-0.87958	80
	64	65 Hypoxanthine	C5H4N4O	[M+H]+	137.046	-0.6	7.62	0.25	30	Hypoxanthine	606707	873349	2232244	1526932	1121261	4401927	3239330	7017936	997968	327364	3084476	2642355	1750353	248320	932320	0.186418	1.98794	49	0.165936	2.20797	62	0.481426	0.703538	10	0.655833	0.442807	7	0.186418	-1.98794	49	0.781841	0.220028	1	0.173023	-1.2844	22	0.205045	-1.54513	26
	65	66 Inosine	C10H12N4O5	[M+H]+	269.088	-2.4	7.6	0.16	30	Inosine	224859	247785	690474	419318	367327	1548024	974093	2268930	301137	117037	885236	813201	492450	90431	297035	0.197521	2.0898	15	0.191512	2.14324	16	0.477757	0.762287	3	0.716871	0.376966	2	0.197521	-2.0898	15	0.9395	0.0534397	0	0.164751	-1.32751	7	0.193035	-1.71283	10
	66	67 Inosinic acid	C10H13N4O8P	[M+H]+	349.054	-1.7	12.31	0.42	12	Inosinic acid	-	48678	137252	32221	30272	30599	-	53862	-	-	-	38413	52261	-	-	0.146077	1.40874	1	0.142075	1.43974	1	0.214177	1.05898	1	0.142727	1.43449	1	0.146077	-1.40874	1	0.488684	0.0310057	0	0.204893	-0.349758	0	0.573351	0.0257569	0
	67	68 L-Acetylcarnitine	C9H17NO4	[M+H]+	204.123	-1.2	7.54	0.29	30	L-Acetylcarnitine	83716784	33669264	58496596	39231348	23495820	64982880	32981356	38822936	37475924	18593772	57853200	35908312	37959464	32186772	16861918	0.279246	0.313013	181	0.0220131	1.19834	3375	0.182176	0.399485	287	0.0807356	-0.610573	1077	0.279246	-0.313013	181	0.00458141	0.885324	11279	0.409415	0.0864719	91	0.0152207	-0.923586	6552
	68	69 L-Alanine	C3H7NO2	[M+H]+	90.055	4.9	10.87	0.08	30	L-Alanine	52710924	88058904	149634288	52802952	65398720	44533580	88709048	118179248	42125216	59626352	43823600	96125120	111836384	40689652	56005620	0.00270639	1.48512	88829	0.00527205	1.06844	37172	0.0410206	0.476334	3688	0.00271364	1.42828	86070	0.00270639	-1.48512	88829	0.0322379	-0.416688	2185	0.000580624	-1.00879	235957	0.722538	-0.0568451	66
	69	70 L-Arginine	C6H14N4O2	[M+H]+	175.119	-2	18.53	0.21	30	L-Arginine	19492970	20178328	37612800	25649518	16335283	19176744	20349496	24093292	19348022	17706692	20208904	24340194	23952576	20354232	15739377	0.241989	0.390373	136	0.0589015	0.782994	659	0.216725	0.401092	153	0.120715	0.540855	290	0.241989	-0.390373	136	0.0636498	0.392621	396	0.949253	0.010719	23	0.336686	0.150483	68
	70	71 L-Asparagine	C4H8N2O3	[M+H]+	133.061	-1.3	11.43	0.12	30	L-Asparagine	5914368	9025464	13679803	5427978	6634520	5487508	8994922	12101293	4345906	6129866	5628621	10033205	11286187	4366395	5721252	0.000633414	1.39034	35321	0.00117643	1.00374	15781	0.0183503	0.401961	781	0.000726253	1.12203	27021	0.000633414	-1.39034	35321	0.0310881	-0.386594	229	0.00071728	-0.988375	19451	0.0637304	-0.26831	98
	71	72 L-Aspartic acid	C4H7NO4	[M-H]-	132.03	-10.9	11.81	0.07	30	L-Aspartic acid	57000964	53981656	81519680	53580060	43865744	50402120	54120164	62554812	46159148	37116844	48220276	59254484	65863636	44244204	36272804	0.0277905	0.544062	3095	0.00812521	0.84031	12016	0.0805471	0.327041	979	0.0477537	0.431906	1721	0.0277905	-0.544062	3095	0.0750417	0.296248	712	0.079654	-0.21702	757	0.374158	-0.112156	144
	72	73 L-Carnitine	C7H16NO3	[Cat]+	162.113	-2.3	9.58	0.11	30	L-Carnitine	415053792	208232512	342839680	197308304	143157616	317719168	191498368	235223280	175047680	111257000	306441568	197755360	242907952	146669360	94267264	0.0555452	0.661526	6360	0.0137263	1.23542	33439	0.100416	0.458426	3235	0.210974	-0.34009	1860	0.0555452	-0.661526	6360	0.0503146	0.573894	4278	0.165653	-0.203101	1293	0.00981875	-1.00162	52959
	73	74 L-Cystathionine	C7H14N2O4S	[M+H]+	223.075	-2.7	13.23	0.26	4	L-Cystathionine	-	-	25439	-	-	-	-	-	-	-	-	-	22030	-	-	0.146689	0.296335	0	0.146689	0.296335	0	0.146689	0.296335	0	0.146689	0.296335	0	0.146689	-0.296335	0	NA	0	0	NA	0	0	NA	0	0
	74	75 L-Cysteine	C3H7NO2S	[M+H]+	122.027	1.4	14.91	0.31	0	L-Cysteine	-	-	-	-	-	-	-	-	-	-	-	-	-	-	-	NA	0	0	NA	0	0	NA	0	0	NA	0	0	NA	0	0	NA	0	0	NA	0	0	NA	0	0
	75	76 L-Cystine	C6H12N2O4S2	[M-H]-	239.017	-1.2	12.78	0.32	23	L-Cystine	-	-	-	51288	32482	-	37849	27373	44532	50241	23170	44073	-	65219	41132	0.00890888	-1.31899	11	0.0286193	-0.94023	2	0.218111	-0.638903	0	0.69328	0.0971397	0	0.00890888	1.31899	11	0.194487	0.378758	0	0.108466	0.680085	1	0.00590322	1.41613	17
	76	77 L-Glutamic acid	C5H9NO4	[M+H]+	148.06	-1.6	11.55	0.19	30	L-Glutamic acid	141798320	112727064	153279056	122318184	94500744	108762864	121349200	147889952	104410080	97260440	115853792	126497528	134464432	101465272	92171232	0.0140281	0.408568	12046	0.000943372	0.617567	195048	0.0221026	0.27282	7254	0.115143	0.249636	1380	0.0140281	-0.408568	12046	0.0917588	0.208999	1285	0.231337	-0.135748	545	0.347139	-0.158932	372
	77	78 L-Glutamine	C5H10N2O3	[M+H]+	147.076	-2.9	11.19	0.11	30	L-Glutamine	267715600	287835520	478571264	219542960	239650144	231165920	278635680	378167488	168097056	198891824	225088080	294224640	336635104	169290832	182670832	0.00950888	1.09948	65737	0.0136996	0.941887	42409	0.0589854	0.471471	8047	0.0239874	0.721045	21959	0.00950888	-1.09948	65737	0.421935	-0.157589	519	0.00447661	-0.628005	81566	0.0611263	-0.378431	4540
	78	79 L-Histidine	C6H9N3O2	[M+H]+	156.077	-1.6	10.7	0.11	30	L-Histidine	9254003	13016523	24581852	10451421	9005975	7356773	10377043	14487091	7599506	7049750	7777506	11642700	13658631	7692482	7298132	0.0685486	1.03435	391	0.0515431	1.1749	555	0.176077	0.589709	125	0.0566846	1.11237	490	0.0685486	-1.03435	391	0.516072	0.140542	17	0.0621736	-0.444646	222	0.701933	0.078015	13
	79	80 L-Isoleucine	C6H13NO2	[M+H]+	132.102	-0.8	7.29	0.27	30	L-Isoleucine	6461006	12861307	26867740	11277915	12029751	5792314	13266970	19871966	7299456	11903598	6585142	15176644	17541676	8766474	10988622	0.0153627	1.23318	2337	0.0256144	0.880266	1188	0.0570701	0.638087	480	0.00575022	1.77072	8221	0.0153627	-1.23318	2337	0.104503	-0.352919	127	0.026946	-0.595098	641	0.0753585	0.537535	148
	80	81 L-Kynurenine	C10H12N2O3	[M+H]+	209.092	15	6.03	0.21	20	L-Kynurenine	-	262557	169379	388420	236290	220905	667513	325388	509997	774168	-	310340	602056	316141	-	0.79108	-0.147101	1	0.941771	0.0807632	0	0.803251	-0.177486	1	0.125902	1.99999	7	0.79108	0.147101	1	0.809482	0.227864	1	0.953782	-0.0303857	0	0.0218528	2.14709	50
	81	82 L-Lactic acid	C3H6O3	[M-H]-	89.0244	-13.7	7.37	0.09	2	L-Lactic acid	-	-	6360899	5544720	-	-	-	-	-	-	-	-	-	-	-	0.642769	0.0750009	9	0.373901	0.139571	15	0.373901	0.139571	15	0.373901	0.139571	15	0.642769	-0.0750009	9	0.373901	0.06457	14	0.373901	0.06457	14	0.373901	0.06457	14
	82	83 L-Leucine	C6H13NO2	[M+H]+	132.102	-1.6	7.68	0.12	30	L-Leucine	7593018	14451424	27752368	13371028	14139877	7100898	15541562	23456816	9117170	12077668	6706306	15590260	21048882	9358882	12648846	0.00493061	1.182	7984	0.0056273	0.894635	6119	0.0111957	0.664655	2781	0.00101637	1.75553	51858	0.00493061	-1.182	7984	0.196236	-0.287362	73	0.0327467	-0.517343	564	0.0680728	0.573535	194
	83	84 L-Lysine	C6H14N2O2	[M+H]+	147.113	-1.4	18.02	0.08	30	L-Lysine	211792	231835	429557	277539	194971	231759	173397	232187	200334	135511	171820	254408	202619	262889	176518	0.612286	0.222627	1	0.179775	0.769652	2	0.415545	0.389958	1	0.321239	0.490181	1	0.612286	-0.222627	1	0.0574034	0.547024	5	0.468635	0.167331	1	0.229643	0.267554	1
	84	85 L-Malic acid	C4H6O5	[M-H]-	133.014	-10.9	12.96	0.11	30	L-Malic acid	5934972	17868702	66135604	13505537	16331879	9401865	18779946	40272768	13537968	7387058	7779316	17254258	41723428	11535968	12587295	0.0122606	1.94098	9745	0.0132127	2.02859	9492	0.0201447	1.45845	4594	0.00786128	2.67991	23266	0.0122606	-1.94098	9745	0.791152	0.0876162	17	0.00304055	-0.48253	7083	0.0127103	0.738932	1350
	85	86 L-Methionine	C5H11NO2S	[M+H]+	150.058	-0.8	8.01	0.14	30	L-Methionine	2971496	5675752	10145158	4166820	5033980	2636908	5085964	7999736	2928872	4220354	2547125	5414611	7445432	2987006	3889885	0.0048686	1.34372	3099	0.0096036	0.96117	1309	0.0202527	0.661714	544	0.00222257	1.64975	7940	0.0048686	-1.34372	3099	0.125133	-0.382547	40	0.00974621	-0.682002	720	0.203877	0.306031	18
	86	87 L-Phenylalanine	C9H11NO2	[M+H]+	166.086	-1.5	6.79	0.27	30	L-Phenylalanine	3967477	7986590	16832780	7104076	7616220	3281105	8408510	12036351	4431056	6562803	3756642	8879666	11119930	4572826	5708092	0.0156677	1.31183	1481	0.0225269	1.00777	891	0.0519082	0.661908	332	0.00562247	1.86142	5493	0.0156677	-1.31183	1481	0.287982	-0.30406	26	0.0279605	-0.649924	387	0.129136	0.549585	51
	87	88 L-Proline	C5H9NO2	[M+H]+	116.071	0.8	9.07	0.09	30	L-Proline	81037192	185520432	346767328	87484096	135143888	64862696	183916256	271270368	67767080	118444488	72299216	209821216	276772096	69716376	119842264	0.000882114	1.99186	841524	0.0022103	1.26074	229150	0.0149513	0.627375	25383	0.000803957	2.03594	946220	0.000882114	-1.99186	841524	0.00387498	-0.731123	42723	0.000351755	-1.36449	981156	0.787362	0.0440718	97
	88	89 L-Serine	C3H7NO3	[M+H]+	106.05	3.1	11.85	0.11	30	L-Serine	4022333	4011109	6548868	3461698	3578180	3123538	4489050	5478180	2760092	3620904	3442466	4722086	4924776	2880607	2890484	0.00750567	0.897122	1077	0.0126665	0.748576	598	0.075333	0.358473	86	0.0176037	0.678964	417	0.00750567	-0.897122	1077	0.363025	-0.148546	10	0.0103402	-0.538649	523	0.219748	-0.218158	17
	89	90 L-Threonine	C4H9NO3	[M-H]-	118.051	-9.9	10.68	0.11	30	L-Threonine	952679	1064213	2364774	1178712	1176579	609166	1377522	1214449	1092185	1057943	1037506	1862170	1338381	884771	779814	0.192212	0.64001	11	0.173005	0.706115	12	0.660641	0.192309	3	0.116788	0.919804	20	0.192212	-0.64001	11	0.763714	0.0661052	1	0.197562	-0.447701	9	0.303873	0.279794	4
	90	91 L-Tryptophan	C11H12N2O2	[M+H]+	205.097	-1.2	8.01	0.2	30	L-Tryptophan	619915	774486	1480648	582499	607748	431857	698504	1089384	541487	511644	436972	782721	967132	508182	516651	0.0153329	1.1158	122	0.0159823	1.11238	117	0.053113	0.649011	29	0.014921	1.2485	133	0.0153329	-1.1158	122	0.974455	-0.0034211	1	0.00376713	-0.466793	238	0.505772	0.132694	1
	91	92 L-Tyrosine	C9H11NO3	[M+H]+	182.081	-1.5	9.32	0.13	30	L-Tyrosine	4269038	4937616	10232425	4438972	4525632	3140052	4940448	7194212	3306581	3622154	3392491	4950858	6423858	3438125	3260280	0.0255535	1.09262	487	0.0274262	1.06396	448	0.0609018	0.685605	170	0.0229793	1.14278	555	0.0255535	-1.09262	487	0.892391	-0.0286595	4	0.027327	-0.407019	210	0.809586	0.0501522	5
	92	93 L-Valine	C5H11NO2	[M+H]+	118.086	1.2	8.86	0.1	30	L-Valine	5150490	6626232	11119255	7130324	6513868	4245915	7263902	9021056	5009040	5679586	4518034	7473250	8516032	4913638	4976203	0.0228978	0.748829	559	0.0137419	0.738993	928	0.0438826	0.423714	255	0.0042751	1.04227	3418	0.0228978	-0.748829	559	0.965669	-0.00983549	6	0.134341	-0.325114	60	0.246605	0.293443	26
	93	94 N6-Acetyl-L-lysine	C8H16N2O3	[M+H]+	189.123	-8.8	3	0.07	0	N6-Acetyl-L-lysine	-	-	-	-	-	-	-	-	-	-	-	-	-	-	-	NA	0	0	NA	0	0	NA	0	0	NA	0	0	NA	0	0	NA	0	0	NA	0	0	NA	0	0
	94	95 N-Acetylglutamic acid	C7H11NO5	[M+H]+	190.071	-1.6	11.28	0.42	30	N-Acetylglutamic acid	60387	94660	127322	63737	85012	65676	106094	133848	70319	59800	70181	82318	128269	48154	57481	0.000553388	1.0958	368	0.00232029	0.944951	82	0.00775346	0.460228	20	5.05557e-05	0.988749	3832	0.000553388	-1.0958	368	0.575538	-0.150844	0	0.0240653	-0.635567	5	0.548944	-0.107046	0
	95	96 N-Acetylglutamine	C7H12N2O4	[M-H]-	187.072	-4.4	8.02	0.37	30	N-Acetylglutamine	115854	195732	387495	91202	125296	101734	143500	233504	106051	94668	132363	162732	281741	83656	82945	0.0107313	1.68421	59	0.0133005	1.57543	45	0.0495536	0.846727	8	0.016438	1.36716	33	0.0107313	-1.68421	59	0.633631	-0.108782	0	0.0113673	-0.837481	21	0.105198	-0.31705	1
	96	97 N-Acetyl-L-alanine	C5H9NO3	[M+H]+	132.065	-0.2	6.9	0.33	30	N-Acetyl-L-alanine	253917	292079	516552	206475	186072	173560	280946	339745	139471	146337	183973	342012	349678	123725	142518	0.0173403	1.36048	41	0.0145064	1.34442	49	0.183328	0.398298	3	0.034089	0.979894	18	0.0173403	-1.36048	41	0.95463	-0.0160553	0	0.00928394	-0.96218	48	0.257044	-0.380584	1
	97	98 N-Acetyl-L-methionine	C7H13NO3S	[M+H]+	192.069	-1.5	4.76	0.44	30	N-Acetyl-L-methionine	22448	31370	53605	20122	20575	10092	24219	43434	11603	29986	17497	29011	36929	23331	21142	0.0117215	1.28292	7	0.0223122	0.901783	3	0.035824	0.663159	2	0.0097722	1.42082	8	0.0117215	-1.28292	7	0.297772	-0.381134	0	0.0734014	-0.619758	0	0.755367	0.137905	0
	98	99 N-Acetyl-L-phenylalanine	C11H13NO3	[M+H]+	208.097	-1.5	3.32	0.06	0	N-Acetyl-L-phenylalanine	-	-	-	-	-	-	-	-	-	-	-	-	-	-	-	NA	0	0	NA	0	0	NA	0	0	NA	0	0	NA	0	0	NA	0	0	NA	0	0	NA	0	0
	99	100 N-Acetylornithine	C7H14N2O3	[M+H]+	175.108	-0.7	9.78	0.26	30	N-Acetylornithine	464769	583195	1632224	436617	408636	381316	654224	1036947	289083	274427	349848	760700	894257	307173	309338	0.0216556	1.7866	122	0.0202337	1.84427	135	0.0875576	0.834623	19	0.0259955	1.57513	91	0.0216556	-1.7866	122	0.836944	0.0576678	0	0.00977094	-0.95198	100	0.399828	-0.211474	1
	100	101 N-Acetylserine	C5H9NO4	[M-H]-	146.046	-7.4	8.25	0.09	30	N-Acetylserine	436907	781998	1592306	424370	468830	375346	599702	1033517	351813	407395	360371	662019	1119869	310239	363064	0.0074245	1.78565	374	0.00905454	1.59572	277	0.03546	0.874035	50	0.0080768	1.67549	324	0.0074245	-1.78565	374	0.323625	-0.189928	1	0.00717057	-0.911612	137	0.519627	-0.110156	1
	101	102 NAD	C21H28N7O14P2	[Cat]+	664.116	-1.1	10.83	0.1	30	NAD	419240	2067054	5893406	373075	634238	351870	1434142	3044282	251205	239028	160668	1613753	3927748	80812	439864	0.00871298	4.18955	4736	0.0105624	3.29242	2192	0.0401689	1.33071	188	0.00927819	3.78737	3422	0.00871298	-4.18955	4736	0.227007	-0.897126	3	0.00205875	-2.85884	3418	0.546392	-0.402175	1
	102	103 NADH	C21H29N7O14P2	[M-H]-	664.117	-14.5	10.84	0.24	10	NADH	-	21022	55164	-	-	-	13213	33892	-	-	-	14921	45430	-	-	0.00478765	2.16442	26	0.00478765	2.16442	26	0.0124797	1.45202	7	0.00478765	2.16442	26	0.00478765	-2.16442	26	NA	0	0	0.0544304	-0.712405	0	NA	0	0
	103	104 NADP	C21H29N7O17P3	[Cat]+	744.083	0.1	13.52	0.3	2	NADP	-	-	77616	-	-	-	-	-	-	-	-	-	-	-	-	0.373901	1.70216	0	0.373901	1.70216	0	0.373901	1.70216	0	0.373901	1.70216	0	0.373901	-1.70216	0	NA	0	0	NA	0	0	NA	0	0
	104	105 NADPH	C21H30N7O17P3	[M-H]-	744.084	3.8	13.94	0.18	1	NADPH	-	-	11634	-	-	-	-	-	-	-	-	-	-	-	-	0.373901	0.0765135	0	0.373901	0.0765135	0	0.373901	0.0765135	0	0.373901	0.0765135	0	0.373901	-0.0765135	0	NA	0	0	NA	0	0	NA	0	0
	105	106 Niacinamide	C6H6N2O	[M+H]+	123.055	-0.7	4.52	0.09	30	Niacinamide	187905024	187230048	288376320	135197984	163869632	153633312	204108784	240267472	125957016	182224320	175610784	246768208	201535104	125094616	127371440	0.0106024	0.918716	33177	0.0456013	0.624991	6784	0.374547	0.194452	697	0.0584476	0.49767	5022	0.0106024	-0.918716	33177	0.151765	-0.293725	1157	0.00957714	-0.724265	29450	0.0143463	-0.421047	14052
	106	107 Nicotinic acid	C6H5NO2	[M-H]-	122.025	-8.6	5.7	0.46	0	Nicotinic acid	-	-	-	-	-	-	-	-	-	-	-	-	-	-	-	NA	0	0	NA	0	0	NA	0	0	NA	0	0	NA	0	0	NA	0	0	NA	0	0	NA	0	0
	107	108 O-Phosphoethanolamine	C2H8NO4P	[M+H]+	142.026	-0.5	12.49	0.25	30	O-Phosphoethanolamine	973785	2781226	8869318	2833258	1806566	3033242	1379572	2105056	1423641	285996	2787433	2068746	3421310	2019879	830484	0.268999	1.19754	29	0.145261	2.30009	98	0.266499	1.20844	30	0.30781	1.08321	24	0.268999	-1.19754	29	0.137826	1.10255	24	0.979467	0.0108976	2	0.833066	-0.114335	3
	108	109 Ornithine	C5H12N2O2	[M+H]+	133.097	1.1	17.03	0.2	3	Ornithine	-	-	100331	-	-	-	-	-	-	-	-	-	-	-	-	0.373901	0.299644	0	0.373901	0.299644	0	0.373901	0.299644	0	0.373901	0.299644	0	0.373901	-0.299644	0	NA	0	0	NA	0	0	NA	0	0
	109	110 Orotic acid	C5H4N2O4	[M-H]-	155.01	-6.7	7.77	0.25	17	Orotic acid	-	246513	1966792	25918	26384	-	177338	1648153	24582	24692	-	157256	1411567	-	-	0.000506894	6.16555	120288	0.00050714	6.15374	119262	0.000814146	3.11268	9930	0.000502235	6.42317	144812	0.000506894	-6.16555	120288	0.949288	-0.0118186	0	0.00327243	-3.05287	275	0.121503	0.257612	0
	110	111 Orotidylic acid	C10H13N2O11P	[M+H]+	369.033	12.8	2.77	0.18	0	Orotidylic acid	-	-	-	-	-	-	-	-	-	-	-	-	-	-	-	NA	0	0	NA	0	0	NA	0	0	NA	0	0	NA	0	0	NA	0	0	NA	0	0	NA	0	0
	111	112 Oxidized glutathione	C20H32N6O12S2	[M+H]+	613.159	-1.1	14.34	0.13	30	Oxidized glutathione	2890542	2492877	5287487	1309499	746700	3000984	1388254	1944771	1098448	643057	2658333	1952915	2508168	889269	634867	0.1079	1.56274	59	0.0676484	2.26633	139	0.294892	0.739488	15	0.7217	0.188084	5	0.1079	-1.56274	59	0.0285061	0.703594	51	0.0683313	-0.823248	39	0.000375647	-1.37465	13630
	112	113 Oxoadipic acid	C6H8O5	[M-H]-	159.03	-6.3	7.55	0.07	0	Oxoadipic acid	-	-	-	-	-	-	-	-	-	-	-	-	-	-	-	NA	0	0	NA	0	0	NA	0	0	NA	0	0	NA	0	0	NA	0	0	NA	0	0	NA	0	0
	113	114 Oxoglutaric acid	C5H6O5	[M-H]-	145.014	-7.9	12.55	0.13	26	Oxoglutaric acid	627884	1246723	3420160	852797	768379	456138	582444	1845269	363472	377762	378818	798340	2583626	493500	-	0.0128243	2.19872	570	0.0111469	2.38762	731	0.024567	1.57882	212	0.00988674	2.42375	842	0.0128243	-2.19872	570	0.742555	0.188905	1	0.278732	-0.619893	4	0.64172	0.225029	1
	114	115 Palmitic acid	C16H32O2	[M-H]-	255.233	-1.8	2.72	0.14	17	Palmitic acid	-	-	3572584	2800154	6762808	3370199	-	-	3183717	-	2903039	2905959	2796298	9555495	2809452	0.345497	-0.892977	21	0.526252	-0.467607	9	0.421722	0.277416	7	0.960622	0.0165846	3	0.345497	0.892977	21	0.642559	0.42537	9	0.26295	1.17039	32	0.337933	0.909562	22
	115	116 Pantothenic acid	C9H17NO5	[M+H]+	220.118	-2.5	6.38	0.24	30	Pantothenic acid	21421826	52263604	74244016	32089462	29743922	19122012	44770996	59271084	29127712	24949890	17424278	49250212	58126884	25285272	23445304	0.00322366	1.1476	31859	0.00238586	1.2943	46221	0.0549169	0.389634	1344	0.00111137	1.72508	123752	0.00322366	-1.1476	31859	0.365869	0.146696	83	0.00245899	-0.757967	26682	0.0141167	0.577481	2545
	116	117 Phenol	C6H6O	[M-H]-	93.0346	-12.8	3.23	0.05	0	Phenol	-	-	-	-	-	-	-	-	-	-	-	-	-	-	-	NA	0	0	NA	0	0	NA	0	0	NA	0	0	NA	0	0	NA	0	0	NA	0	0	NA	0	0
	117	118 Phosphocreatine	C4H10N3O5P	[M-H]-	210.029	-3.5	12.03	0.16	15	Phosphocreatine	10152	17261	47090	15545	13738	14713	-	-	-	-	10033	-	17206	12135	-	0.347205	0.979486	0	0.302122	1.13891	0	0.347559	0.995618	0	0.315656	1.09014	0	0.347205	-0.979486	0	0.554499	0.159425	0	0.964015	0.0161326	0	0.699085	0.110655	0
	118	119 Phosphoenolpyruvic acid	C3H5O6P	[M-H]-	166.975	-6	14.28	0.22	11	Phosphoenolpyruvic acid	-	44768	193064	24115	20340	-	-	40333	-	-	-	28262	63228	-	-	0.179132	2.20216	2	0.173518	2.28923	2	0.231455	1.6702	1	0.173278	2.29322	2	0.179132	-2.20216	2	0.392917	0.0870642	0	0.262674	-0.531964	0	0.373901	0.0910518	0
	119	120 Phosphoribosyl pyrophosphate	C5H13O14P3	[M-H]-	388.945	-7.1	17.54	0	0	Phosphoribosyl pyrophosphate	-	-	-	-	-	-	-	-	-	-	-	-	-	-	-	NA	0	0	NA	0	0	NA	0	0	NA	0	0	NA	0	0	NA	0	0	NA	0	0	NA	0	0
	120	121 Phosphorylcholine	C5H14NO4P	[M+H]+	184.073	-2.8	11.62	0.14	30	Phosphorylcholine	266456224	508797216	955133120	219178752	346866048	286908448	472039488	625246336	163476288	175434640	292013088	599140160	684397120	164307120	230731680	0.0051634	2.04986	375799	0.0113087	1.58858	133765	0.102852	0.519465	8931	0.00969464	1.4217	143243	0.0051634	-2.04986	375799	0.270565	-0.461271	1102	0.00120808	-1.53039	847623	0.00765419	-0.628155	46859
	121	122 Phosphoserine	C3H8NO6P	[M+H]+	186.016	-1.6	13.14	0.35	10	Phosphoserine	-	42454	378996	-	16583	-	-	28664	-	-	-	17947	68756	-	-	0.265378	3.34982	3	0.26633	3.31907	3	0.295608	2.64858	2	0.265378	3.34982	3	0.265378	-3.34982	3	0.373901	-0.0307441	0	0.319857	-0.701239	0	NA	0	0
	122	123 Pipecolic acid	C6H11NO2	[M+H]+	130.086	-0.4	7.66	0.36	29	Pipecolic acid	184572	238468	411548	179435	164902	157184	279094	322411	211003	163506	171055	261769	361457	152361	148395	0.00395903	1.01299	139	0.00143606	1.20001	419	0.0205509	0.491171	21	0.00197471	1.09498	290	0.00395903	-1.01299	139	0.282962	0.187025	1	0.0187541	-0.521818	17	0.621273	0.0819909	0
	123	124 Propionylcarnitine	C10H19NO4	[M+H]+	218.139	-0.9	6.45	0.32	30	Propionylcarnitine	5922884	4448599	5817862	1751850	1092697	5294982	4046258	3793707	1511216	648428	5226602	4809234	4588818	1221136	667919	0.00599355	1.66301	1645	0.00291987	2.5594	5589	0.659406	0.0940603	7	0.300181	-0.211672	20	0.00599355	-1.66301	1645	0.0305805	0.896391	70	0.000395244	-1.56895	22254	0.00012158	-1.87468	105211
	124	125 Pyruvic acid	C3H4O3	[M-H]-	87.0088	-12.3	6.23	0.16	18	Pyruvic acid	224498	-	194611	328876	196456	162467	170317	235131	-	-	-	195648	172220	237551	-	0.507696	-0.25754	1	0.230533	0.259633	1	0.280863	0.213531	1	0.516392	0.156322	0	0.507696	0.25754	1	0.242521	0.517173	1	0.269787	0.471071	1	0.341389	0.413861	1
	125	126 Ribose 1-phosphate	C5H11O8P	[M-H]-	229.012	-2.1	12.39	0.11	25	Ribose 1-phosphate	20527	56333	112125	34931	25181	26143	37524	57705	35180	22942	38267	52263	49429	28984	-	0.112707	1.14575	1	0.0604619	1.75269	3	0.299665	0.585482	0	0.0926301	1.36817	1	0.112707	-1.14575	1	0.0235806	0.606942	2	0.0609469	-0.560269	1	0.447774	0.222419	0
	126	127 Saccharopine	C11H20N2O6	[M-H]-	275.125	12.5	11.63	0.24	0	Saccharopine	-	-	-	-	-	-	-	-	-	-	-	-	-	-	-	NA	0	0	NA	0	0	NA	0	0	NA	0	0	NA	0	0	NA	0	0	NA	0	0	NA	0	0
	127	128 S-Adenosylhomocysteine	C14H20N6O5S	[M-H]-	383.114	0.2	9.7	0.12	10	S-Adenosylhomocysteine	-	17473	36899	-	-	-	13414	23690	-	-	-	18331	28611	-	-	0.00688623	1.57208	9	0.00688623	1.57208	9	0.0323479	0.857858	1	0.00688623	1.57208	9	0.00688623	-1.57208	9	NA	0	0	0.0134282	-0.714224	2	NA	0	0
	128	129 S-Adenosylmethionine	C15H22N6O5S	[M+H]+	399.144	-2.3	11.91	0.32	30	S-Adenosylmethionine	339602	1591450	4092220	632038	668344	330735	1049620	1751911	703656	543288	360954	1454205	2915669	615018	396716	0.0283876	2.1669	282	0.0247858	2.44532	380	0.0888652	1.09694	52	0.0188936	3.08645	734	0.0283876	-2.1669	282	0.241415	0.278421	3	0.0122972	-1.06996	172	0.000429772	0.919549	2187
	129	130 Sarcosine	C3H7NO2	[M+H]+	90.055	6	11.36	0.11	30	Sarcosine	9113715	10204611	15473783	6875654	7411818	9141267	12072371	14233559	7000348	7406603	8137628	12979977	13104644	5588464	7439190	0.000686472	1.13717	33256	0.000559125	0.943716	37308	0.0773895	0.280107	204	0.00196684	0.697881	9513	0.000686472	-1.13717	33256	0.108134	-0.193456	74	0.00486492	-0.857065	3396	0.0144874	-0.439291	715
	130	131 Succinic acid	C4H6O4	[M-H]-	117.019	-9.7	12.17	0.07	10	Succinic acid	-	-	1580736	-	-	-	1158971	1380797	-	1027968	-	1294927	1225430	-	-	0.0203261	0.463385	82	0.0213421	0.455934	78	0.141217	0.272574	11	0.0203261	0.463385	82	0.0203261	-0.463385	82	0.373901	-0.00745115	3	0.154361	-0.190812	8	NA	0	0
	131	132 Taurine	C2H7NO3S	[M-H]-	124.007	-10.4	11.46	0.19	30	Taurine	97831696	63432796	89772024	59361592	51062852	74614072	72015584	77257432	53767232	52053652	80447544	75850248	74907224	48983808	48114404	0.00842631	0.577633	11927	0.00315403	0.677876	33237	0.158269	0.195346	546	0.684801	-0.0638994	126	0.00842631	-0.577633	11927	0.323469	0.100243	173	0.0258451	-0.382287	3139	0.0163135	-0.641532	6614
	132	133 Thymidine	C10H14N2O5	[M-H]-	241.083	-1.2	4.57	0.22	0	Thymidine	-	-	-	-	-	-	-	-	-	-	-	-	-	-	-	NA	0	0	NA	0	0	NA	0	0	NA	0	0	NA	0	0	NA	0	0	NA	0	0	NA	0	0
	133	134 Uracil	C4H4N2O2	[M+H]+	113.035	3.9	6.68	0.4	28	Uracil	79037	29005	49772	39733	-	85971	46951	81676	42577	29512	67049	48406	55634	34613	31919	0.0810866	0.678112	1	0.0291769	1.08814	3	0.14641	0.589125	1	0.253696	-0.310808	0	0.0810866	-0.678112	1	0.0261306	0.410033	2	0.728524	-0.088987	0	0.00306362	-0.98892	38
	134	135 Ureidopropionic acid	C4H8N2O3	[M-H]-	131.046	-9.3	11.44	0.15	30	Ureidopropionic acid	1310473	1834389	3216457	1193928	1444263	1078932	1935696	2717887	900513	1296342	1110195	2240282	2572105	906510	1366921	0.00108606	1.50314	5006	0.00183189	1.05029	2377	0.0224293	0.501104	153	0.0013121	1.28137	3707	0.00108606	-1.50314	5006	0.0252246	-0.45285	64	0.00298836	-1.00203	1007	0.241421	-0.22177	5
	135	136 Ureidosuccinic acid	C5H8N2O5	[M-H]-	175.036	-5.4	13.65	0.1	29	Ureidosuccinic acid	11008	698624	8556811	68769	123940	31880	741791	8575318	105581	25042	35829	565002	6978112	59519	39739	0.000114188	6.6878	3663121	0.00011394	6.99725	4540891	0.000157554	3.58767	332136	0.000111201	8.25876	11104311	0.000114188	-6.6878	3663121	0.679786	0.309446	0	0.000427843	-3.10013	7480	0.0321354	1.57095	5
	136	137 Uric acid	C5H4N4O3	[M+H]+	169.036	10	10.72	0	2	Uric acid	-	-	-	22774	-	-	-	-	18212	-	-	-	-	-	-	0.134563	-0.765139	0	NA	0	0	NA	0	0	NA	0	0	0.134563	0.765139	0	0.134563	0.765139	0	0.134563	0.765139	0	0.134563	0.765139	0
	137	138 Uridine	C9H12N2O6	[M-H]-	243.062	-1.1	6.67	0.32	30	Uridine	285592	154619	180538	139797	116431	422526	248076	335888	241499	149389	356376	260003	178360	155914	135829	0.437449	0.371083	1	0.139123	0.790633	2	0.871173	0.0682171	0	0.132805	-0.615527	3	0.437449	-0.371083	1	0.242472	0.419551	1	0.413612	-0.302865	1	0.0254824	-0.98661	21
	138	139 Uridine 5'-diphosphate	C9H14N2O12P2	[M+H]+	405.01	-1.7	13.25	0.11	29	Uridine 5'-diphosphate	94762	186190	616025	111823	107240	98327	144771	262019	64480	33723	98799	179244	331534	90659	54610	0.0450787	2.1798	25	0.0376792	2.62872	38	0.0993279	1.24535	7	0.0476076	2.05102	22	0.0450787	-2.1798	25	0.408622	0.448927	0	0.0124006	-0.934443	20	0.578304	-0.128781	0
	139	140 Uridine 5'-monophosphate	C9H13N2O9P	[M-H]-	323.029	-0.6	12.07	0.18	30	Uridine 5'-monophosphate	581980	991765	1983408	483733	510656	484274	836872	1236890	584112	729975	550435	1213004	1327826	473678	464961	0.0135339	1.56092	221	0.0190104	1.415	146	0.124807	0.580422	15	0.0145582	1.49223	199	0.0135339	-1.56092	221	0.572402	-0.145916	1	0.0120645	-0.980493	125	0.611295	-0.0686858	1
	140	141 Uridine diphosphate glucose	C15H24N2O17P2	[M-H]-	565.048	1	13.26	0.09	30	Uridine diphosphate glucose	235777	1089289	3096543	403533	421136	366517	493212	971113	226911	98563	329305	745188	1609506	307699	131560	0.0667234	2.59729	100	0.0584223	3.12387	157	0.162441	1.28627	20	0.0662342	2.60739	101	0.0667234	-2.59729	100	0.450525	0.526576	1	0.0618986	-1.31102	22	0.974513	0.0100988	0
	141	142 Uridine diphosphate-N-acetylglucosamine	C17H27N3O17P2	[M+H]+	608.089	-1.2	12.16	0.09	30	Uridine diphosphate-N-acetylglucosamine	294912	401641	855892	200421	232182	233063	350155	496686	181560	176326	222558	387381	558869	147631	156675	0.0146594	1.85166	100	0.0165787	1.75788	84	0.0828813	0.746673	10	0.0267507	1.34868	42	0.0146594	-1.85166	100	0.687381	-0.0937823	0	0.000734077	-1.10498	815	0.0545158	-0.50298	6
	142	143 Uridine triphosphate	C9H15N2O15P3	[M-H]-	482.961	0.7	15.02	0.25	2	Uridine triphosphate	-	-	30259	-	-	-	-	-	-	-	-	-	-	-	-	0.373901	0.744419	0	0.373901	0.744419	0	0.373901	0.744419	0	0.373901	0.744419	0	0.373901	-0.744419	0	NA	0	0	NA	0	0	NA	0	0
	143	144 Valerylcarnitine	C12H23NO4	[M+H]+	246.17	-2	4.87	0.41	30	Valerylcarnitine	1332217	1108612	2068242	628738	433059	1020615	764173	1188625	459314	294226	932105	826764	1152082	387258	242363	0.0336702	1.57942	87	0.0197626	2.1849	206	0.147313	0.707716	13	0.310749	0.424569	6	0.0336702	-1.57942	87	0.139096	0.605485	4	0.0331541	-0.8717	38	0.0128289	-1.15485	138
	144	145 Xanthine	C5H4N4O2	[M-H]-	151.026	-6.3	8.59	0.11	30	Xanthine	497536	566532	738766	798202	629853	478890	459368	691448	449845	477868	446963	499463	517361	508934	496473	0.64304	0.14858	1	0.238073	0.27983	3	0.130809	0.352526	6	0.064296	0.452349	12	0.64304	-0.14858	1	0.68777	0.13125	1	0.528789	0.203946	1	0.36391	0.303769	2
	145	146 Xanthosine	C10H12N4O6	[M-H]-	283.068	0	7.73	0.21	0	Xanthosine	-	-	-	-	-	-	-	-	-	-	-	-	-	-	-	NA	0	0	NA	0	0	NA	0	0	NA	0	0	NA	0	0	NA	0	0	NA	0	0	NA	0	0
	146	147 Xanthylic acid	C10H13N4O9P	[M-H]-	363.035	0.4	11.16	0	0	Xanthylic acid	-	-	-	-	-	-	-	-	-	-	-	-	-	-	-	NA	0	0	NA	0	0	NA	0	0	NA	0	0	NA	0	0	NA	0	0	NA	0	0	NA	0	0
Figure 9B
		Skeleton_Metabolite	Metabolite	Formula	Ion Type	RT Start (min)	RT End (min)	m/z Tolerance (ppm)	RT Tolerance (min)	mz	obs_mz	ppm	winner	RT	RT_min	RT_max	RT_range	WT1 IgM	WT2 IgM	WT3 IgM	KO1 IgM	KO2 IgM	KO3 IgM	Blank_0	Blank_1	Blank_2	Blank_3	Blank_4	Blank_5	ttest_pval	1/pvalue	WT IgM_Mean	KO IgM_Mean	Log2FoldChange	LogFoldChange	blank_threshold	combined_mean	impact_score	Detection
	0	1-Methylnicotinamide	1 1-Methylnicotinamide	C7H8N2O	[M+H]+	19	21	15	0.2	137.071	137.071	-0.3	S14406	20.76	20.51	21	0.49	44013.5	44013.5	44013.5	44013.5	44013.5	44013.5	13465	14960	11760	9911	9388	8543	NA	NA	44013.5	44013.5	0	1	44013.5	44013.5	0	0
	1	2,3-Diphosphoglyceric acid	2 2,3-Diphosphoglyceric acid	C3H8O10P2	[M-H]-	12	15	15	0.2	264.952	264.952	0	S14414	12.99	12.99	12.99	0	10000	10000	10000	10000	10000	10000	0	0	0	0	0	0	NA	NA	10000	10000	0	1	10000	10000	0	0
	2	3-Hydroxybutyric acid	3 3-Hydroxybutyric acid	C4H8O3	[M-H]-	5.7	7.7	15	0.2	103.04	103.039	-10.4	S14405	6.07	6.03	6.2	0.17	321621	321621	321621	321621	321621	321621	93076	99252	105272	111792	111422	102428	NA	NA	321621	321621	0	1	321621	321621	0	0
	3	3-Phosphoglyceric acid	4 3-Phosphoglyceric acid	C3H7O7P	[M-H]-	13	15	15	0.2	184.986	184.985	-4.1	S14396	13.76	13.6	14.01	0.41	25557	13310.5	13310.5	13310.5	13310.5	13310.5	2014	3065	0	1542	0	0	0.373901	2.6745	17392.7	13310.5	0.385914	1.30669	13310.5	15351.6	0	1
	4	4,5-Dihydroorotic acid	5 4,5-Dihydroorotic acid	C5H6N2O4	[M-H]-	7.5	9.5	15	0.2	157.025	157.024	-6.9	S14396	8.59	8.47	8.81	0.34	176153	35339	42597	17766	56194	34980	1963	2131	1852	1908	0	0	0.362419	2.75923	84696.3	36313.3	1.2218	2.33238	13927	60504.8	0	6
	5	4-Hydroxyproline	6 4-Hydroxyproline	C5H9NO3	[M+H]+	10.2	11.2	15	0.2	132.065	132.066	3.6	S14396	10.67	10.49	10.79	0.3	94213568	90345704	95260488	47997052	63231388	61309496	157568	22099	232193	20088	269120	19813	0.00204941	487.944	9.32733e+07	5.75126e+07	0.697584	1.62179	370440	7.53929e+07	59662	6
	6	5'-Methylthioadenosine	7 5'-Methylthioadenosine	C11H15N5O3S	[M+H]+	3	5	15	0.2	298.097	298.096	-2.5	S14396	4.18	4.13	4.33	0.2	1645664	1056889	1703918	328601	860976	772839	34769	34125	79904	52957	47998	44602	0.0368382	27.1458	1.46882e+06	654139	1.16699	2.24543	157178	1.06148e+06	65	6
	7	5-Phosphoribosylamine	8 5-Phosphoribosylamine	C5H12NO7P	[M-H]-	11.5	13.5	15	0.2	228.028	228.027	-2.5	S14407	11.62	11.62	11.62	0	10000	10000	10000	10000	10000	10000	0	0	0	0	0	0	NA	NA	10000	10000	0	1	10000	10000	0	0
	8	6-Phosphogluconic acid	9 6-Phosphogluconic acid	C6H13O10P	[M-H]-	14	17	15	0.2	275.017	275.018	3.8	S14413	14.66	14.66	14.89	0.23	10000	10000	10000	10000	10000	10000	0	0	0	0	0	0	NA	NA	10000	10000	0	1	10000	10000	0	0
	9	Acetoacetic acid	10 Acetoacetic acid	C4H6O3	[M-H]-	8.3	10.3	15	0.2	101.024	101.023	-11.1	S14419	9.57	9.36	9.81	0.46	215488	189239	201100	119423	173221	196871	17239	20659	19734	16666	20789	14620	0.183517	5.44909	201942	163172	0.307553	1.23761	64853.5	182557	1	6
	10	Acetyl-CoA	11 Acetyl-CoA	C23H38N7O17P3S	[M+H]+	8	11	15	0.2	810.133	810.126	-8.1	S14406	9.56	9.32	9.76	0.44	10000	10610	10000	10000	10000	10000	0	0	0	0	0	0	0.373901	2.6745	10203.3	10000	0.0290405	1.02033	10000	10101.7	0	1
	11	Acetylcysteine	12 Acetylcysteine	C5H9NO3S	[M+H]+	6	8	15	0.2	164.038	164.037	-0.6	S14416	7.2	7.1	7.39	0.28	85404	72964	98935	29666	115933	121998	0	0	0	0	0	0	0.916516	1.09109	85767.7	89199	-0.0565937	0.961532	10000	87483.3	0	6
	12	Adenine	13 Adenine	C5H5N5	[M+H]+	5	7	15	0.2	136.062	136.062	-1.3	S14421	6.15	6.08	6.2	0.13	26811068	32900122	41221736	19281554	24383152	25772112	198355	145643	261076	155858	291073	208085	0.0854619	11.7011	3.36443e+07	23145606	0.539624	1.45359	640045	2.8395e+07	483	6
	13	Adenosine	14 Adenosine	C10H13N5O4	[M+H]+	4.5	7	15	0.2	268.104	268.103	-2.7	S14421	5.81	5.68	5.88	0.2	47167076	61802288	64877084	33820488	37996820	41477344	278740	96361	347887	170435	243354	120470	0.0266812	37.4796	57948816	37764884	0.617734	1.53446	638624	47856850	2752	6
	14	Adenosine diphosphate ribose	15 Adenosine diphosphate ribose	C15H23N5O14P2	[M-H]-	10.9	12.9	15	0.2	558.064	558.065	1.6	S14396	11.73	11.65	11.74	0.09	462185	522087	694680	141411	435113	365218	0	0	0	0	0	0	0.0947186	10.5576	559651	313914	0.834157	1.78282	10000	436782	8	6
	15	Adenosine monophosphate	16 Adenosine monophosphate	C10H14N5O7P	[M+H]+	9.8	11.8	15	0.2	348.07	348.07	-2.5	S14396	10.73	10.49	10.78	0.28	17438130	12230496	16324308	8583584	13165397	12190543	366872	101064	523627	165335	372653	132992	0.129498	7.7221	15330978	1.13132e+07	0.438446	1.35514	841272	1.33221e+07	139	6
	16	Adenosine triphosphate	17 Adenosine triphosphate	C10H16N5O13P3	[M-H]-	12.5	14.5	15	0.2	505.988	505.989	0.8	S14396	13.3	13.2	13.55	0.35	22535	17022.5	17022.5	17022.5	17022.5	17022.5	3262	3489	2499	2523	2272	0	0.373901	2.6745	18860	17022.5	0.147887	1.10795	17022.5	17941.2	0	1
	17	Adenylsuccinic acid	18 Adenylsuccinic acid	C14H18N5O11P	[M-H]-	14.5	16.5	15	0.2	462.067	462.067	0.7	S14396	15.1	15.1	15.1	0	10000	10000	10000	10000	10000	10000	0	0	0	0	0	0	NA	NA	10000	10000	0	1	10000	10000	0	0
	18	ADP	19 ADP	C10H15N5O10P2	[M-H]-	11.1	13.1	15	0.2	426.022	426.022	0.4	S14396	11.94	11.73	12.18	0.46	61392	25531	29695	25531	34443	25531	4551	3394	9554	5958	5187	2418	0.425722	2.34895	38872.7	28501.7	0.44771	1.36387	25531	33687.2	0	3
	19	Allantoin	20 Allantoin	C4H6N4O3	[M-H]-	9.3	11.3	15	0.2	157.037	157.036	-6.5	S14396	10.4	10.17	10.42	0.26	439870	463767	513170	251045	384701	304839	9742	9366	7912	8632	6009	5865	0.023304	42.9112	472269	313528	0.591013	1.5063	33763	392899	25	6
	20	Aminoadipic acid	21 Aminoadipic acid	C6H11NO4	[M-H]-	5.9	7.9	15	0.2	160.061	160.06	-6.5	S14396	7.26	7.18	7.33	0.15	265007	200901	242257	127390	178619	185973	7331	7261	7767	6624	6651	6944	0.0518929	19.2705	236055	163994	0.52548	1.43941	31289	200024	6	6
	21	Argininosuccinic acid	22 Argininosuccinic acid	C10H18N4O6	[M-H]-	12.5	14.5	15	0.2	289.115	289.115	-0.6	S14396	13.37	13.34	13.44	0.1	50037	27584	35483	10996.5	23361	19911	0	0	1993	0	0	0	0.0599242	16.6877	37701.3	18089.5	1.05946	2.08416	10996.5	27895.4	1	5
	22	Beta-Alanine	23 Beta-Alanine	C3H7NO2	[M+H]+	9.8	10.5	15	0.2	90.055	90.0555	6	S14396	10.22	10.15	10.29	0.15	699153	840878	896678	326717	583382	462696	37374	41810	51416	44178	57362	63616	0.0199803	50.0492	812236	457598	0.827818	1.775	157878	634917	56	6
	23	Betaine	24 Betaine	C5H11NO2	[M+H]+	7	8.2	15	0.2	118.086	118.087	2.1	S14419	7.82	7.77	7.86	0.09	75313024	69174448	80137064	36150136	68798984	94607608	792370	726656	808142	775922	906214	825538	0.652671	1.53217	7.48748e+07	6.65189e+07	0.170717	1.12562	2427421	7.06969e+07	122	6
	24	Butyrylcarnitine	25 Butyrylcarnitine	C11H21NO4	[M+H]+	4.2	6.2	15	0.2	232.154	232.154	-1.4	S14396	5.6	5.35	5.8	0.45	3559095	2931355	2879622	1326223	1812064	1886533	13029	8168	12348	7167	7406	8333	0.00666169	150.112	3.12336e+06	1674940	0.898988	1.86476	38225.5	2.39915e+06	672	6
	25	Carbamoyl phosphate	26 Carbamoyl phosphate	CH4NO5P	[M-H]-	27	30	15	0.2	139.975	139.975	-6.7	S14420	27.14	27.03	27.38	0.35	43134	43134	43134	43134	43134	43134	9118	9671	12234	10877	11536	12832	NA	NA	43134	43134	0	1	43134	43134	0	0
	26	Carnosine	27 Carnosine	C9H14N4O3	[M+H]+	10.6	12.6	15	0.2	227.114	227.113	-1.6	S14397	11.62	11.51	11.66	0.16	70596	88839	119944	57234	94313	71419	0	0	0	0	0	4591	0.35528	2.81468	93126.3	74322	0.3254	1.25301	12295.5	83724.2	0	6
	27	CDP	28 CDP	C9H15N3O11P2	[M+H]+	13	15	15	0.2	404.026	404.025	-1.1	S14396	13.8	13.8	14.03	0.23	14101	14101	14101	14101	14101	14101	3103	0	2577	2522	0	0	NA	NA	14101	14101	0	1	14101	14101	0	0
	28	Choline	29 Choline	C5H14NO	[Cat]+	11	15	15	0.2	104.107	104.107	2	S14401	12.79	12.77	12.95	0.19	65341700	137643984	132707872	52242876	77870736	83694288	595216	513419	1061739	670693	1124359	730914	0.182798	5.47053	111897852	71269300	0.65083	1.57007	2358170	91583576	787	6
	29	cis-Aconitic acid	30 cis-Aconitic acid	C6H6O6	[M-H]-	14.1	16.1	15	0.2	173.009	173.008	-5.6	S14396	14.84	14.79	14.9	0.11	2839788	1801594	2416500	629481	1405457	1191789	39336	14591	90842	27291	67847	29645	0.028286	35.3532	2.35263e+06	1.07558e+06	1.12916	2.18732	144776	1.7141e+06	133	6
	30	Citric acid	31 Citric acid	C6H8O7	[M-H]-	14.2	16.2	15	0.2	191.02	191.019	-4.9	S14396	15.33	15.09	15.5	0.41	3710862	166909	752118	463936	481834	131385	48251	36912	38748	22529	9730	6181	0.343342	2.91255	1.5433e+06	359052	2.10375	4.29826	91175.5	951174	12	6
	31	Citrulline	32 Citrulline	C6H13N3O3	[M+H]+	10.9	12.9	15	0.2	176.103	176.103	-0.4	S14397	11.92	11.87	11.97	0.1	1799087	1694810	1494180	986050	1402571	1551219	130346	114090	106736	109557	113664	107830	0.141885	7.04794	1.66269e+06	1313280	0.340347	1.26606	351112	1.48799e+06	13	6
	32	Creatine	33 Creatine	C4H9N3O2	[M+H]+	10	11.5	15	0.2	132.077	132.076	-2.7	S14394	10.72	10.67	10.76	0.09	62184920	56365508	61245104	34927004	54384184	54210604	102564	113799	133180	91551	162779	98566	0.145638	6.86636	59931844	4.78406e+07	0.325087	1.25274	361220	5.38862e+07	464	6
	33	Creatinine	34 Creatinine	C4H7N3O	[M+H]+	5.2	7.2	15	0.2	114.066	114.066	1.9	S14420	6.47	6.41	6.5	0.09	19596748	19331724	21959740	10098766	15086232	36368936	130348	151946	160577	140858	167498	164364	0.979452	1.02098	2.02961e+07	20517978	-0.0156881	0.989185	467796	2.0407e+07	21	6
	34	Cyclic AMP	35 Cyclic AMP	C10H12N5O6P	[M-H]-	5.8	7.8	15	0.2	328.045	328.045	0.5	S14401	6.95	6.83	6.98	0.15	43129	35114	42228	18878	29151	27269	0	1670	0	0	0	0	0.0205002	48.78	40157	25099.3	0.678002	1.59992	10835	32628.2	3	6
	35	Cytidine	36 Cytidine	C9H13N3O5	[M+H]+	7.1	9.1	15	0.2	244.093	244.093	-0.8	S14401	8.28	8.03	8.42	0.39	429597	811657	902783	279166	467999	515208	17784	12327	25280	20847	24859	21923	0.14366	6.96088	714679	420791	0.764192	1.69842	71510	567735	7	6
	36	Cytidine monophosphate	37 Cytidine monophosphate	C9H14N3O8P	[M+H]+	11.8	13.8	15	0.2	324.059	324.058	-2.6	S14396	12.97	12.72	12.97	0.25	187934	132947	216570	93631	138957	134194	13563	14172	31833	24885	30556	26721	0.11607	8.61546	179150	122261	0.55121	1.46531	80865	150706	2	6
	37	Cytidine triphosphate	38 Cytidine triphosphate	C9H16N3O14P3	[M-H]-	15	20	15	0.2	481.977	481.978	2.6	S14396	15.29	15.29	15.51	0.23	10000	10000	10000	10000	10000	10000	0	0	0	0	0	0	NA	NA	10000	10000	0	1	10000	10000	0	0
	38	Cytosine	39 Cytosine	C4H5N3O	[M+H]+	9	11	15	0.2	112.05	112.051	2.3	S14406	9.32	9.13	9.56	0.43	176672	176672	176672	176672	176672	176672	48006	53973	58902	55478	55966	61019	NA	NA	176672	176672	0	1	176672	176672	0	0
	39	D-2-Hydroxyglutaric acid	40 D-2-Hydroxyglutaric acid	C5H8O5	[M-H]-	11.6	13.6	15	0.2	147.03	147.029	-6.8	S14396	12.19	12.14	12.23	0.09	2362282	2015350	2642044	1221046	1938974	1859279	229855	211004	211241	200397	197295	194993	0.0834681	11.9806	2339892	1.6731e+06	0.483919	1.39854	632392	2.0065e+06	34	6
	40	D-Glucose	41 D-Glucose	C6H12O6	[M-H]-	9	11	15	0.2	179.056	179.055	-4.5	S14397	10.98	10.74	11.02	0.28	234614	274297	269428	212345	235239	207695	23316	35852	13508	8084	10053	11895	0.0533705	18.737	259446	218426	0.248289	1.1878	61354	238936	5	6
	41	D-Glyceraldehyde 3-phosphate	42 D-Glyceraldehyde 3-phosphate	C3H7O6P	[M-H]-	13	14	15	0.2	168.991	168.99	-6.8	S14396	13.01	13	13.24	0.24	10000	10000	10000	10000	10000	10000	0	0	0	0	0	0	NA	NA	10000	10000	0	1	10000	10000	0	0
	42	Dihydrofolic acid	43 Dihydrofolic acid	C19H21N7O6	[M+H]+	13	16	15	0.2	444.163	444.166	8.8	S14411	13	13	13.23	0.23	10000	10000	10000	10000	10000	10000	0	0	0	0	0	0	NA	NA	10000	10000	0	1	10000	10000	0	0
	43	Dihydroxyacetone phosphate	44 Dihydroxyacetone phosphate	C3H7O6P	[M-H]-	12	13	15	0.2	168.991	168.99	-5.6	S14396	12.88	12.66	12.99	0.33	12106	10000	10000	10000	10000	10000	0	0	0	0	0	0	0.373901	2.6745	10702	10000	0.0978804	1.0702	10000	10351	0	1
	44	D-Ribose 5-phosphate	45 D-Ribose 5-phosphate	C5H11O8P	[M-H]-	12.4	13.8	15	0.2	229.012	229.011	-2.5	S14396	12.61	12.45	12.66	0.21	132588	68434	93494	36565	67772	57635	9074	2363	9707	3921	5518	2691	0.100955	9.90544	98172	53990.7	0.862602	1.81831	26637	76081.3	1	6
	45	D-Sedoheptulose 7-phosphate	46 D-Sedoheptulose 7-phosphate	C7H15O10P	[M-H]-	12.2	14.2	15	0.2	289.033	289.033	0	S14396	13.03	12.96	13.24	0.28	16581	10821	12653	10821	14041	10821	0	0	1642	0	0	0	0.508509	1.96653	13351.7	11894.3	0.166745	1.12252	10821	12623	0	3
	46	dTDP	47 dTDP	C10H16N2O11P2	[M-H]-	11	13	15	0.2	401.016	401.013	-5.6	S14416	12.08	12.08	12.33	0.25	10000	10000	10000	10000	10000	10000	0	0	0	0	0	0	NA	NA	10000	10000	0	1	10000	10000	0	0
	47	FAD	48 FAD	C27H33N9O15P2	[M+H]+	7.6	9.6	15	0.2	786.164	786.161	-4.2	S14396	8.67	8.51	8.84	0.33	21411	18517	23863	15299	16876	20993	0	0	0	0	0	0	0.197756	5.05674	21263.7	17722.7	0.262795	1.1998	10000	19493.2	0	6
	48	Folic acid	49 Folic acid	C19H19N7O6	[M+H]+	13	16	15	0.2	442.147	442.146	-1.9	S14397	13.72	13.72	13.95	0.23	10000	10000	10000	10000	10000	10000	0	0	0	0	0	0	NA	NA	10000	10000	0	1	10000	10000	0	0
	49	Fructose 1,6-bisphosphate	50 Fructose 1,6-bisphosphate	C6H14O12P2	[M-H]-	14.1	16.1	15	0.2	338.989	338.989	0.1	S14396	14.77	14.67	15.02	0.34	18127	18127	18127	18127	18127	18127	6826	4726	2118	2584	0	0	NA	NA	18127	18127	0	1	18127	18127	0	0
	50	Fructose 6-phosphate	51 Fructose 6-phosphate	C6H13O9P	[M-H]-	12.6	13.5	15	0.2	259.022	259.022	-1	S14396	13.49	13.45	13.5	0.05	129759	86231	134995	38310	120868	80545	11998	0	11436	2425	8659	3738	0.261731	3.82072	116995	79907.7	0.550041	1.46413	29128	98451.3	1	6
	51	Fumaric acid	52 Fumaric acid	C4H4O4	[M-H]-	12.2	14.2	15	0.2	115.004	115.002	-10.3	S14396	12.96	12.85	13	0.15	1476192	1599915	1455428	688290	1387570	1207103	52793	39348	71865	41432	53519	40914	0.124196	8.05178	1.51051e+06	1094321	0.465001	1.38032	159936	1.30242e+06	14	6
	52	Glucose 6-phosphate	53 Glucose 6-phosphate	C6H13O9P	[M-H]-	13.6	14.4	15	0.2	259.022	259.022	-1	S14396	13.6	13.6	13.7	0.1	100264	90087	160857	52031	103824	100720	7649	0	9703	4038	9923	2902	0.318901	3.13577	117069	85525	0.452945	1.36883	27107.5	101297	0	6
	53	Glutathione	54 Glutathione	C10H17N3O6S	[M+H]+	10	13	15	0.2	308.091	308.091	-1.9	S14396	11.45	11.2	11.69	0.49	40103	40103	40103	40103	40103	40103	10010	10356	10537	10029	9547	9727	NA	NA	40103	40103	0	1	40103	40103	0	0
	54	Glycerol 3-phosphate	55 Glycerol 3-phosphate	C3H9O6P	[M-H]-	11.5	13	15	0.2	171.006	171.005	-5.9	S14396	11.86	11.73	11.95	0.22	565060	393248	600253	277054	522726	550245	11068	2716	18637	4700	16503	5002	0.554323	1.804	519520	450008	0.207228	1.15447	39313	484764	1	6
	55	Glycine	56 Glycine	C2H5NO2	[M+H]+	10.7	12.7	15	0.2	76.0393	76.04	9.1	S14420	11.73	11.65	11.74	0.09	4860406	5939952	5777356	3727336	4578298	10054475	68177	24394	69611	27213	76676	26858	0.782335	1.27822	5.5259e+06	6.12004e+06	-0.14733	0.90292	156464	5.82297e+06	8	6
	56	Guanidoacetic acid	57 Guanidoacetic acid	C3H7N3O2	[M+H]+	10.7	12.7	15	0.2	118.061	118.061	2.5	S14397	11.69	11.64	11.74	0.1	542089	471578	447367	352800	537658	840422	12196	11059	13292	10148	12624	10075	0.568482	1.75907	487011	576960	-0.244516	0.844099	44697	531986	1	6
	57	Guanine	58 Guanine	C5H5N5O	[M+H]+	7.7	9.7	15	0.2	152.057	152.056	-1.2	S14396	8.51	8.44	8.63	0.19	1256120	1417852	1849981	882599	1141663	1147501	32335	22322	39849	32073	43726	35296	0.0847003	11.8063	1.50798e+06	1.05725e+06	0.512299	1.42632	112800	1.28262e+06	22	6
	58	Guanosine	59 Guanosine	C10H13N5O5	[M+H]+	7.7	9.7	15	0.2	284.099	284.098	-2.6	S14421	8.87	8.74	8.92	0.17	202802	264989	303666	118202	169513	167507	11815	0	13667	11112	11906	6720	0.0356775	28.0288	257152	151741	0.761015	1.69468	37610	204446	10	6
	59	Guanosine diphosphate	60 Guanosine diphosphate	C10H15N5O11P2	[M-H]-	13.8	15.8	15	0.2	442.017	442.017	0.1	S14396	14.79	14.79	15.04	0.24	13334	13334	13334	13334	13334	13334	0	0	4935	0	1733	0	NA	NA	13334	13334	0	1	13334	13334	0	0
	60	Guanosine monophosphate	61 Guanosine monophosphate	C10H14N5O8P	[M+H]+	12.6	14.6	15	0.2	364.065	364.065	-2.1	S14396	13.43	13.39	13.56	0.17	217776	111477	155447	94995	123789	113720	21643	17099	38338	32288	30830	29792	0.187746	5.32634	161567	110835	0.54372	1.45773	94995	136201	1	5
	61	Guanosine triphosphate	62 Guanosine triphosphate	C10H16N5O14P3	[M-H]-	15	17	15	0.2	521.983	521.984	1.4	S14396	16.8	16.73	16.99	0.26	10000	10000	10000	10000	10000	10000	0	0	0	0	0	0	NA	NA	10000	10000	0	1	10000	10000	0	0
	62	Homocysteine	63 Homocysteine	C4H9NO2S	[M-H]-	7.3	9.3	15	0.2	134.028	134.027	-9.1	S14421	8.56	8.45	8.65	0.2	10000	10000	10000	10000	10000	10000	0	0	0	0	0	0	NA	NA	10000	10000	0	1	10000	10000	0	0
	63	Hypotaurine	64 Hypotaurine	C2H7NO2S	[M+H]+	10	12	15	0.2	110.027	110.027	2.5	S14421	11.12	11.08	11.17	0.09	2491912	2188896	3141020	1035609	3028460	2353339	0	0	0	0	2686	0	0.510665	1.95823	2607276	2139136	0.285515	1.21885	11343	2373206	6	6
	64	Hypoxanthine	65 Hypoxanthine	C5H4N4O	[M+H]+	5.8	7.8	15	0.2	137.046	137.046	-0.6	S14416	7.62	7.53	7.78	0.25	873349	3239330	2642355	646824	1696620	1972513	15422	9350	11044	8307	10471	10744	0.376074	2.65905	2251678	1.43865e+06	0.646283	1.56513	42669	1.84517e+06	8	6
	65	Inosine	66 Inosine	C10H12N4O5	[M+H]+	6.4	8.4	15	0.2	269.088	269.087	-2.4	S14416	7.6	7.52	7.68	0.16	247785	974093	813201	169510	493303	558258	0	0	0	0	0	0	0.340373	2.93796	678360	407024	0.736938	1.66663	10000	542692	3	6
	66	Inosinic acid	67 Inosinic acid	C10H13N4O8P	[M+H]+	11.4	13.4	15	0.2	349.054	349.054	-1.7	S14396	12.31	12.1	12.52	0.42	48678	29722	38413	29722	29722	29722	4281	3625	6732	5741	10236	8829	0.167825	5.95858	38937.7	29722	0.389635	1.31006	29722	34329.8	0	2
	67	L-Acetylcarnitine	68 L-Acetylcarnitine	C9H17NO4	[M+H]+	6.3	8.3	15	0.2	204.123	204.123	-1.2	S14419	7.54	7.29	7.57	0.29	33669264	32981356	35908312	22440948	31411138	37667976	16863	9154	12776	10031	10214	21950	0.460027	2.17379	3.41863e+07	3.05067e+07	0.164293	1.12062	50494	32346499	79	6
	68	L-Alanine	69 L-Alanine	C3H7NO2	[M+H]+	10.6	11.2	15	0.2	90.055	90.0554	4.9	S14396	10.87	10.81	10.89	0.08	88058904	88709048	96125120	48988840	72805760	69923496	236505	108752	274578	104529	305261	139872	0.0270627	36.9512	9.09644e+07	63906032	0.509349	1.42341	594748	7.74352e+07	4073	6
	69	L-Arginine	70 L-Arginine	C6H14N4O2	[M+H]+	18.5	21	15	0.2	175.119	175.119	-2	S14396	18.53	18.51	18.71	0.21	20178328	20349496	24340194	15540535	20024786	18219010	3313046	1488788	6324508	2973431	5497358	2663506	0.121262	8.24662	2.16227e+07	1.79281e+07	0.270321	1.20608	1.11403e+07	1.97754e+07	197	6
	70	L-Asparagine	71 L-Asparagine	C4H8N2O3	[M+H]+	10.3	12.3	15	0.2	133.061	133.061	-1.3	S14396	11.43	11.37	11.49	0.12	9025464	8994922	10033205	5903176	7123404	7825638	39043	5474	35196	7788	40720	7557	0.0217137	46.0539	9351197	6.95074e+06	0.427985	1.34535	77889	8.15097e+06	505	6
	71	L-Aspartic acid	72 L-Aspartic acid	C4H7NO4	[M-H]-	10.8	12.8	15	0.2	132.03	132.029	-10.9	S14396	11.81	11.76	11.83	0.07	53981656	54120164	59254484	35677748	50810252	50447740	555240	27352	599397	43659	504951	31837	0.127101	7.86774	5.57854e+07	4.56452e+07	0.289424	1.22215	891218	5.07153e+07	488	6
	72	L-Carnitine	73 L-Carnitine	C7H16NO3	[Cat]+	8.3	10.3	15	0.2	162.113	162.112	-2.3	S14419	9.58	9.5	9.61	0.11	208232512	191498368	197755360	109042528	164725216	172591008	36541	33290	50699	26500	68345	30381	0.0706869	14.1469	199162080	1.48786e+08	0.420702	1.33858	132878	1.73974e+08	3294	6
	73	L-Cystathionine	74 L-Cystathionine	C7H14N2O4S	[M+H]+	12.2	14.2	15	0.2	223.075	223.074	-2.7	S14396	13.23	13.13	13.39	0.26	17685.5	17685.5	17685.5	17685.5	17685.5	17685.5	4385	4263	3873	0	0	2850	NA	NA	17685.5	17685.5	0	1	17685.5	17685.5	0	0
	74	L-Cysteine	75 L-Cysteine	C3H7NO2S	[M+H]+	13	17	15	0.2	122.027	122.027	1.4	S14411	14.91	14.83	15.14	0.31	10000	10000	10000	10000	10000	10000	0	0	0	0	0	0	NA	NA	10000	10000	0	1	10000	10000	0	0
	75	L-Cystine	76 L-Cystine	C6H12N2O4S2	[M-H]-	11.7	13.7	15	0.2	239.017	239.016	-1.2	S14418	12.78	12.56	12.88	0.32	18587	37849	44073	44164	53541	38546	2340	1941	5218	1816	3810	2049	0.248595	4.02261	33503	45417	-0.438942	0.737675	18587	39460	0	5
	76	L-Glutamic acid	77 L-Glutamic acid	C5H9NO4	[M+H]+	10	13	15	0.2	148.06	148.06	-1.6	S14421	11.55	11.44	11.63	0.19	112727064	121349200	126497528	89515896	118923704	125990232	986252	82541	886897	96169	955059	88091	0.503514	1.98604	120191264	1.11477e+08	0.108591	1.07817	1.5575e+06	1.15834e+08	248	6
	77	L-Glutamine	78 L-Glutamine	C5H10N2O3	[M+H]+	10.1	12.1	15	0.2	147.076	147.076	-2.9	S14396	11.19	11.13	11.24	0.11	287835520	278635680	294224640	159708912	241851024	225962656	1490954	62351	1776222	74879	2287276	78222	0.0383609	26.0682	2.86899e+08	2.09174e+08	0.455836	1.37158	2894952	2.48036e+08	8868	6
	78	L-Histidine	79 L-Histidine	C6H9N3O2	[M+H]+	9.9	11.9	15	0.2	156.077	156.077	-1.6	S14396	10.7	10.65	10.76	0.11	13016523	10377043	11642700	5096802	8130808	7664352	833893	232876	723391	247784	782554	233300	0.0177229	56.4243	1.16788e+07	6.96399e+06	0.745901	1.67702	1536899	9.32137e+06	882	6
	79	L-Isoleucine	80 L-Isoleucine	C6H13NO2	[M+H]+	6	7.5	15	0.2	132.102	132.102	-0.8	S14396	7.29	7.14	7.41	0.27	12861307	13266970	15176644	6419879	9456361	8505437	78492	74367	70478	79233	73501	78646	0.00791959	126.269	13768307	8.12723e+06	0.760516	1.6941	237358	1.09478e+07	2342	6
	80	L-Kynurenine	81 L-Kynurenine	C10H12N2O3	[M+H]+	6	8	15	0.2	209.092	209.095	15	S14411	6.03	6.03	6.25	0.21	262557	667513	310340	455646	26651	386714	6768	6727	5695	0	6745	7367	0.538836	1.85585	413470	289670	0.513371	1.42738	26651	351570	1	5
	81	L-Lactic acid	82 L-Lactic acid	C3H6O3	[M-H]-	6.2	8.2	15	0.2	89.0244	89.0232	-13.7	S14396	7.37	7.35	7.44	0.09	4875252	4875252	4875252	4875252	4875252	4875252	1865850	1800302	1549478	1567628	1466033	1481213	NA	NA	4875252	4875252	0	1	4875252	4875252	0	0
	82	L-Leucine	83 L-Leucine	C6H13NO2	[M+H]+	7.5	9	15	0.2	132.102	132.102	-1.6	S14396	7.68	7.68	7.8	0.12	14451424	15541562	15590260	7370829	10831864	9699567	106187	94095	111825	96936	115014	95497	0.00556395	179.729	1.51944e+07	9.30075e+06	0.708122	1.63368	319777	1.22476e+07	3596	6
	83	L-Lysine	84 L-Lysine	C6H14N2O2	[M+H]+	18	20	15	0.2	147.113	147.113	-1.4	S14396	18.02	18	18.08	0.08	231835	173397	254408	191748	201280	210675	39223	16920	42787	21533	37253	20276	0.493122	2.0279	219880	201234	0.12784	1.09266	98996	210557	0	6
	84	L-Malic acid	85 L-Malic acid	C4H6O5	[M-H]-	12.2	14.2	15	0.2	133.014	133.013	-10.9	S14396	12.96	12.9	13	0.11	17868702	18779946	17254258	9072529	16746106	15094685	465780	265447	690538	344216	569526	234093	0.142188	7.03294	1.79676e+07	1.36378e+07	0.397792	1.31749	1294800	1.58027e+07	146	6
	85	L-Methionine	86 L-Methionine	C5H11NO2S	[M+H]+	6.8	8.8	15	0.2	150.058	150.058	-0.8	S14396	8.01	7.95	8.08	0.14	5675752	5085964	5414611	2461057	3979280	3421631	12933	7753	13317	8193	14877	7297	0.0114192	87.5721	5392109	3.28732e+06	0.713937	1.64027	42185	4.33972e+06	623	6
	86	L-Phenylalanine	87 L-Phenylalanine	C9H11NO2	[M+H]+	5.6	7.6	15	0.2	166.086	166.086	-1.5	S14396	6.79	6.77	7.04	0.27	7986590	8408510	8879666	3488034	5532150	4841014	93644	93218	99615	76312	106462	102934	0.00433209	230.835	8424922	4.6204e+06	0.866646	1.82342	296092	6.52266e+06	2745	6
	87	L-Proline	88 L-Proline	C5H9NO2	[M+H]+	7.9	9.9	15	0.2	116.071	116.071	0.8	S14396	9.07	9.05	9.14	0.09	185520432	183916256	209821216	85993096	141400944	135233808	652448	616968	647406	582075	747051	639295	0.0205456	48.6722	193085968	1.20876e+08	0.675716	1.59739	1.95262e+06	1.56981e+08	12205	6
	88	L-Serine	89 L-Serine	C3H7NO3	[M+H]+	10.8	12.8	15	0.2	106.05	106.05	3.1	S14396	11.85	11.8	11.91	0.11	4011109	4489050	4722086	2568672	3553467	3654732	120885	69191	84513	56985	84049	58083	0.0469663	21.2918	4407415	3258957	0.435522	1.3524	246853	3833186	110	6
	89	L-Threonine	90 L-Threonine	C4H9NO3	[M-H]-	9.5	11.5	15	0.2	118.051	118.05	-9.9	S14396	10.68	10.64	10.75	0.11	1064213	1377522	1862170	537904	1078701	1041776	30955	26740	29924	24730	21603	17447	0.131887	7.58225	1434635	886127	0.695098	1.61899	85699.5	1160381	14	6
	90	L-Tryptophan	91 L-Tryptophan	C11H12N2O2	[M+H]+	6.8	8.8	15	0.2	205.097	205.097	-1.2	S14396	8.01	7.87	8.07	0.2	774486	698504	782721	436949	607717	534403	14894	12207	12549	11236	13102	9638	0.0160069	62.473	751904	526356	0.514508	1.42851	46813	639130	57	6
	91	L-Tyrosine	92 L-Tyrosine	C9H11NO3	[M+H]+	8.2	10.2	15	0.2	182.081	182.081	-1.5	S14396	9.32	9.27	9.39	0.13	4937616	4940448	4950858	2374679	3806240	3588335	54583	43007	56996	39997	49192	44505	0.0193186	51.7637	4942974	3256418	0.602093	1.51792	154140	4099696	322	6
	92	L-Valine	93 L-Valine	C5H11NO2	[M+H]+	8.3	9.2	15	0.2	118.086	118.086	1.2	S14396	8.86	8.83	8.92	0.1	6626232	7263902	7473250	3554790	5363891	4905795	162315	158286	175538	156661	183533	176184	0.0138105	72.4085	7121128	4.60816e+06	0.627915	1.54533	516258	5.86464e+06	656	6
	93	N6-Acetyl-L-lysine	94 N6-Acetyl-L-lysine	C8H16N2O3	[M+H]+	1.9	3.9	15	0.2	189.123	189.122	-8.8	S14409	3	2.98	3.05	0.07	48821410	48821410	48821410	48821410	48821410	48821410	17259462	14886605	17054746	15496781	16539716	16385510	NA	NA	48821410	48821410	0	1	48821410	48821410	0	0
	94	N-Acetylglutamic acid	95 N-Acetylglutamic acid	C7H11NO5	[M+H]+	10.3	12.3	15	0.2	190.071	190.071	-1.6	S14401	11.28	11.04	11.46	0.42	94660	106094	82318	49922	91606	84804	8307	5994	6823	6628	8825	7722	0.265509	3.76635	94357.3	75444	0.322728	1.25069	32149.5	84900.7	0	6
	95	N-Acetylglutamine	96 N-Acetylglutamine	C7H12N2O4	[M-H]-	6.8	8.8	15	0.2	187.072	187.072	-4.4	S14396	8.02	7.83	8.2	0.37	195732	143500	162732	78359	107442	109066	3012	1865	0	0	0	2856	0.0193043	51.802	167321	98289	0.76752	1.70234	13866.5	132805	12	6
	96	N-Acetyl-L-alanine	97 N-Acetyl-L-alanine	C5H9NO3	[M+H]+	6	7	15	0.2	132.065	132.065	-0.2	S14396	6.9	6.65	6.98	0.33	292079	280946	342012	156339	197216	219018	17213	25738	22648	19986	16539	26132	0.0121993	81.9717	305012	190858	0.67637	1.59811	74128	247935	32	6
	97	N-Acetyl-L-methionine	98 N-Acetyl-L-methionine	C7H13NO3S	[M+H]+	3	5	15	0.2	192.069	192.069	-1.5	S14396	4.76	4.51	4.96	0.44	31370	24219	29011	12974	20393	23476	0	0	0	0	0	0	0.0696466	14.3582	28200	18947.7	0.573675	1.48831	10000	23573.8	1	6
	98	N-Acetyl-L-phenylalanine	99 N-Acetyl-L-phenylalanine	C11H13NO3	[M+H]+	2.8	4	15	0.2	208.097	208.096	-1.5	S14410	3.32	3.26	3.32	0.06	1314822	1314822	1314822	1314822	1314822	1314822	467955	405430	461749	409983	446824	417703	NA	NA	1314822	1314822	0	1	1314822	1314822	0	0
	99	N-Acetylornithine	100 N-Acetylornithine	C7H14N2O3	[M+H]+	8.6	10.6	15	0.2	175.108	175.108	-0.7	S14396	9.78	9.67	9.93	0.26	583195	654224	760700	232575	500300	427830	6847	11140	9857	9085	6861	10042	0.04265	23.4466	666040	386902	0.783641	1.72147	36916	526471	21	6
	100	N-Acetylserine	101 N-Acetylserine	C5H9NO4	[M-H]-	7.5	8.5	15	0.2	146.046	146.045	-7.4	S14396	8.25	8.2	8.29	0.09	781998	599702	662019	363106	525138	579794	22611	19981	22706	20668	20723	20089	0.084955	11.7709	681240	489346	0.477308	1.39214	73389	585293	10	6
	101	NAD	102 NAD	C21H28N7O14P2	[Cat]+	9.9	11.9	15	0.2	664.116	664.116	-1.1	S14396	10.83	10.76	10.87	0.1	2067054	1434142	1613753	545689	735697	807808	0	0	4451	3987	0	3455	0.00778032	128.529	1704983	696398	1.29177	2.44829	15946.5	1.20069e+06	378	6
	102	NADH	103 NADH	C21H29N7O14P2	[M-H]-	9.5	11.5	15	0.2	664.117	664.108	-14.5	S14396	10.84	10.78	11.02	0.24	21022	13213	14921	10000	10000	12251	0	0	0	0	0	0	0.0860515	11.621	16385.3	10750.3	0.608024	1.52417	10000	13567.8	0	4
	103	NADP	104 NADP	C21H29N7O17P3	[Cat]+	12.7	14.7	15	0.2	744.083	744.083	0.1	S14396	13.52	13.43	13.73	0.3	10000	10000	10000	10000	10000	10000	0	0	0	0	0	0	NA	NA	10000	10000	0	1	10000	10000	0	0
	104	NADPH	105 NADPH	C21H30N7O17P3	[M-H]-	13	15	15	0.2	744.084	744.087	3.8	S14396	13.94	13.94	14.13	0.18	10000	10000	10000	10000	10000	10000	0	0	0	0	0	0	NA	NA	10000	10000	0	1	10000	10000	0	0
	105	Niacinamide	106 Niacinamide	C6H6N2O	[M+H]+	3.3	5.3	15	0.2	123.055	123.055	-0.7	S14396	4.52	4.46	4.55	0.09	187230048	204108784	246768208	95387736	182987504	156388032	416354	331090	1181418	703527	706611	457115	0.0970669	10.3022	2.12702e+08	1.44921e+08	0.553568	1.46771	1.90806e+06	1.78812e+08	2704	6
	106	Nicotinic acid	107 Nicotinic acid	C6H5NO2	[M-H]-	5.5	7.5	15	0.2	122.025	122.024	-8.6	S14394	5.7	5.48	5.94	0.46	75478	75478	75478	75478	75478	75478	23743	22832	20371	19219	22911	21880	NA	NA	75478	75478	0	1	75478	75478	0	0
	107	O-Phosphoethanolamine	108 O-Phosphoethanolamine	C2H8NO4P	[M+H]+	11.4	13.4	15	0.2	142.026	142.026	-0.5	S14396	12.49	12.49	12.74	0.25	2781226	1379572	2068746	746634	2102548	1703117	15585	5001	123307	32162	100838	26629	0.382641	2.61342	2.07651e+06	1517433	0.452531	1.36844	161761	1.79697e+06	6	6
	108	Ornithine	109 Ornithine	C5H12N2O2	[M+H]+	17	19	15	0.2	133.097	133.097	1.1	S14413	17.03	17	17.2	0.2	59279	59279	59279	59279	59279	59279	40747	15664	14285	8880	10866	8116	NA	NA	59279	59279	0	1	59279	59279	0	0
	109	Orotic acid	110 Orotic acid	C5H4N2O4	[M-H]-	6.7	8.7	15	0.2	155.01	155.009	-6.7	S14396	7.77	7.62	7.87	0.25	246513	177338	157256	46754	78825	72747	2490	3163	3165	2755	4716	2760	0.0113751	87.9114	193702	66108.7	1.55093	2.93006	19524.5	129906	33	6
	110	Orotidylic acid	111 Orotidylic acid	C10H13N2O11P	[M+H]+	0	30	15	0.2	369.033	369.038	12.8	S14423	2.77	2.7	2.89	0.18	125828	125828	125828	125828	125828	125828	55701	59771	52963	36160	27061	0	NA	NA	125828	125828	0	1	125828	125828	0	0
	111	Oxidized glutathione	112 Oxidized glutathione	C20H32N6O12S2	[M+H]+	13.5	15.5	15	0.2	613.159	613.159	-1.1	S14396	14.34	14.3	14.43	0.13	2492877	1388254	1952915	844144	1367058	1198289	58139	21232	111525	28975	106032	28204	0.0846116	11.8187	1944682	1136497	0.77494	1.71112	187054	1.54059e+06	31	6
	112	Oxoadipic acid	113 Oxoadipic acid	C6H8O5	[M-H]-	7.5	9.5	15	0.2	159.03	159.029	-6.3	S14423	7.55	7.55	7.62	0.07	27236	27236	27236	27236	27236	27236	5366	4773	6336	5954	5938	6105	NA	NA	27236	27236	0	1	27236	27236	0	0
	113	Oxoglutaric acid	114 Oxoglutaric acid	C5H6O5	[M-H]-	10.8	14.8	15	0.2	145.014	145.013	-7.9	S14396	12.55	12.47	12.61	0.13	1246723	582444	798340	353790	698901	410243	122454	119893	119042	110486	105823	109883	0.156593	6.38596	875836	487645	0.844829	1.79605	353790	681740	8	5
	114	Palmitic acid	115 Palmitic acid	C16H32O2	[M-H]-	1.6	3.6	15	0.2	255.233	255.232	-1.8	S14407	2.72	2.65	2.79	0.14	1999093	1999093	2905959	2374376	2545510	2408841	691087	739416	767927	485622	686998	607136	0.668524	1.49583	2.30138e+06	2442909	-0.0860999	0.942066	1999093	2.37215e+06	4	4
	115	Pantothenic acid	116 Pantothenic acid	C9H17NO5	[M+H]+	5.1	7.1	15	0.2	220.118	220.117	-2.5	S14396	6.38	6.21	6.45	0.24	52263604	44770996	49250212	22894160	35124272	28281826	12280	7052	9224	8247	10204	10700	0.00856901	116.7	48761604	2.87668e+07	0.761343	1.69507	38853.5	3.87642e+07	7668	6
	116	Phenol	117 Phenol	C6H6O	[M-H]-	2.1	4.1	15	0.2	93.0346	93.0334	-12.8	S14409	3.23	3.23	3.28	0.05	19109595	19109595	19109595	19109595	19109595	19109595	6824122	6085866	6206328	6601704	6191696	6289474	NA	NA	19109595	19109595	0	1	19109595	19109595	0	0
	117	Phosphocreatine	118 Phosphocreatine	C4H10N3O5P	[M-H]-	11.2	13.2	15	0.2	210.029	210.028	-3.5	S14396	12.03	11.96	12.13	0.16	17261	10000	10000	10000	10256	13490	0	0	0	0	0	0	0.683253	1.46359	12420.3	11248.7	0.14295	1.10416	10000	11834.5	0	3
	118	Phosphoenolpyruvic acid	119 Phosphoenolpyruvic acid	C3H5O6P	[M-H]-	13.6	15.6	15	0.2	166.975	166.974	-6	S14396	14.28	14.24	14.46	0.22	44768	20172.5	28262	20172.5	22366	20172.5	4325	2766	3510	3739	3423	2582	0.234864	4.25778	31067.5	20903.7	0.57165	1.48622	20172.5	25985.6	0	3
	119	Phosphoribosyl pyrophosphate	120 Phosphoribosyl pyrophosphate	C5H13O14P3	[M-H]-	15	18	15	0.2	388.945	388.942	-7.1	S14398	17.54	17.54	17.54	0	10000	10000	10000	10000	10000	10000	0	0	0	0	0	0	NA	NA	10000	10000	0	1	10000	10000	0	0
	120	Phosphorylcholine	121 Phosphorylcholine	C5H14NO4P	[M+H]+	10	13	15	0.2	184.073	184.073	-2.8	S14396	11.62	11.58	11.72	0.14	508797216	472039488	599140160	192551920	352924224	340223008	2699463	237796	6154199	1076817	4711066	756904	0.0222541	44.9356	5.26659e+08	2.95233e+08	0.835015	1.78388	7.82812e+06	4.10946e+08	32941	6
	121	Phosphoserine	122 Phosphoserine	C3H8NO6P	[M+H]+	11.5	13.5	15	0.2	186.016	186.016	-1.6	S14396	13.14	12.93	13.28	0.35	42454	15576.5	17947	15576.5	16960	15576.5	0	0	6440	2791	0	1922	0.341091	2.93177	25325.8	16037.7	0.659145	1.57915	15576.5	20681.8	0	3
	122	Pipecolic acid	123 Pipecolic acid	C6H11NO2	[M+H]+	7.5	9.5	15	0.2	130.086	130.086	-0.4	S14396	7.66	7.52	7.87	0.36	238468	279094	261769	152084	203022	182837	43950	36414	37467	36584	30418	30640	0.0131221	76.2074	259777	179314	0.534783	1.44872	117736	219546	24	6
	123	Propionylcarnitine	124 Propionylcarnitine	C10H19NO4	[M+H]+	5.2	7.2	15	0.2	218.139	218.138	-0.9	S14419	6.45	6.38	6.7	0.32	4448599	4046258	4809234	2384953	3669387	3463327	11710	11169	9002	9984	9702	9681	0.0501808	19.9279	4434697	3.17256e+06	0.48319	1.39783	40624	3.80363e+06	106	6
	124	Pyruvic acid	125 Pyruvic acid	C3H4O3	[M-H]-	5.5	7.5	15	0.2	87.0088	87.0077	-12.3	S14397	6.23	6.06	6.23	0.16	153182	170317	195648	153182	181914	153182	47241	48063	50177	47543	44097	49242	0.545957	1.83165	173049	162759	0.0884419	1.06322	153182	167904	0	3
	125	Ribose 1-phosphate	126 Ribose 1-phosphate	C5H11O8P	[M-H]-	11	12.4	15	0.2	229.012	229.011	-2.1	S14396	12.39	12.29	12.4	0.11	56333	37524	52263	21172	38704	24118	3310	0	3838	2232	2648	1855	0.0582135	17.1781	48706.7	27998	0.798795	1.73965	16941.5	38352.3	1	6
	126	Saccharopine	127 Saccharopine	C11H20N2O6	[M-H]-	11	14	15	0.2	275.125	275.128	12.5	S14417	11.63	11.63	11.87	0.24	10000	10000	10000	10000	10000	10000	0	0	0	0	0	0	NA	NA	10000	10000	0	1	10000	10000	0	0
	127	S-Adenosylhomocysteine	128 S-Adenosylhomocysteine	C14H20N6O5S	[M-H]-	8.6	10.6	15	0.2	383.114	383.114	0.2	S14396	9.7	9.64	9.76	0.12	17473	13414	18331	10000	11410	10000	0	0	0	0	0	0	0.0201362	49.6617	16406	10470	0.647962	1.56695	10000	13438	1	4
	128	S-Adenosylmethionine	129 S-Adenosylmethionine	C15H22N6O5S	[M+H]+	10.7	12.7	15	0.2	399.144	399.144	-2.3	S14396	11.91	11.77	12.09	0.32	1591450	1049620	1454205	472428	1390385	929584	43773	36310	120941	64376	46586	28428	0.234988	4.25554	1.36509e+06	930799	0.552456	1.46658	180207	1.14795e+06	7	6
	129	Sarcosine	130 Sarcosine	C3H7NO2	[M+H]+	11.2	12	15	0.2	90.055	90.0555	6	S14396	11.36	11.31	11.41	0.11	10204611	12072371	12979977	6123254	10191122	10160406	61278	53282	77758	62731	107293	69786	0.137305	7.28304	1.17523e+07	8.82493e+06	0.413289	1.33172	226064	1.02886e+07	100	6
	130	Succinic acid	131 Succinic acid	C4H6O4	[M-H]-	11.3	13.3	15	0.2	117.019	117.018	-9.7	S14396	12.17	12.13	12.21	0.07	1.01224e+06	1158971	1294927	1.01224e+06	1.01224e+06	1.01224e+06	353953	320805	331510	349420	331717	317082	0.154361	6.47831	1.15538e+06	1.01224e+06	0.190812	1.14141	1.01224e+06	1083812	8	2
	131	Taurine	132 Taurine	C2H7NO3S	[M-H]-	10.2	12.2	15	0.2	124.007	124.006	-10.4	S14394	11.46	11.29	11.48	0.19	63432796	72015584	75850248	44264652	59441180	61845332	26155	6790	34434	8558	46670	9980	0.082476	12.1247	70432876	5.51837e+07	0.352006	1.27633	76293.5	6.28083e+07	972	6
	132	Thymidine	133 Thymidine	C10H14N2O5	[M-H]-	3.5	5.5	15	0.2	241.083	241.083	-1.2	S14422	4.57	4.41	4.62	0.22	31612	31612	31612	31612	31612	31612	11390	14427	4218	3873	4360	4956	NA	NA	31612	31612	0	1	31612	31612	0	0
	133	Uracil	134 Uracil	C4H4N2O2	[M+H]+	5.4	7.4	15	0.2	113.035	113.035	3.9	S14399	6.68	6.52	6.92	0.4	29005	46951	48406	36397	31501	27029	5823	4586	5665	5614	6662	4782	0.222521	4.49395	41454	31642.3	0.389655	1.31008	26566	36548.2	0	6
	134	Ureidopropionic acid	135 Ureidopropionic acid	C4H8N2O3	[M-H]-	10.4	12.4	15	0.2	131.046	131.045	-9.3	S14396	11.44	11.37	11.52	0.15	1834389	1935696	2240282	1207608	1526371	1481586	43639	7392	45483	8205	44406	7285	0.0191246	52.2887	2.00346e+06	1.40519e+06	0.511727	1.42576	88205	1704322	127	6
	135	Ureidosuccinic acid	136 Ureidosuccinic acid	C5H8N2O5	[M-H]-	12.8	14.8	15	0.2	175.036	175.035	-5.4	S14401	13.65	13.6	13.7	0.1	698624	741791	565002	140657	222067	185588	0	0	0	0	0	0	0.0011262	887.943	668472	182771	1.87083	3.65744	10000	425622	1382	6
	136	Uric acid	137 Uric acid	C5H4N4O3	[M+H]+	8.8	10.8	15	0.2	169.036	169.037	10	S14397	10.72	10.72	10.72	0	10000	10000	10000	10000	10000	10000	0	0	0	0	0	0	NA	NA	10000	10000	0	1	10000	10000	0	0
	137	Uridine	138 Uridine	C9H12N2O6	[M-H]-	5.5	7.5	15	0.2	243.062	243.062	-1.1	S14399	6.67	6.57	6.9	0.32	154619	248076	260003	140477	147004	139226	4818	3081	5302	2642	5153	3790	0.078105	12.8033	220899	142236	0.635106	1.55305	22393	181568	4	6
	138	Uridine 5'-diphosphate	139 Uridine 5'-diphosphate	C9H14N2O12P2	[M+H]+	12.4	14.4	15	0.2	405.01	405.009	-1.7	S14396	13.25	13.21	13.31	0.11	186190	144771	179244	57487	108380	96796	2954	0	0	0	0	0	0.0146183	68.4075	170068	87554.3	0.957864	1.94243	11477	128811	17	6
	139	Uridine 5'-monophosphate	140 Uridine 5'-monophosphate	C9H13N2O9P	[M-H]-	11.2	13.2	15	0.2	323.029	323.028	-0.6	S14396	12.07	11.97	12.15	0.18	991765	836872	1213004	525550	775586	644839	54774	15654	54571	23441	40574	18448	0.0492691	20.2967	1.01388e+06	648658	0.644357	1.56304	113731	831269	26	6
	140	Uridine diphosphate glucose	141 Uridine diphosphate glucose	C15H24N2O17P2	[M-H]-	12.4	14.4	15	0.2	565.048	565.048	1	S14396	13.26	13.2	13.29	0.09	1089289	493212	745188	172349	334733	300144	0	0	0	0	0	0	0.0477916	20.9242	775896	269075	1.52785	2.88357	10000	522486	32	6
	141	Uridine diphosphate-N-acetylglucosamine	142 Uridine diphosphate-N-acetylglucosamine	C17H27N3O17P2	[M+H]+	11.2	13.2	15	0.2	608.089	608.088	-1.2	S14396	12.16	12.07	12.17	0.09	401641	350155	387381	162598	258612	241888	0	0	0	0	0	0	0.00891966	112.112	379726	221033	0.780698	1.71796	10000	300379	58	6
	142	Uridine triphosphate	143 Uridine triphosphate	C9H15N2O15P3	[M-H]-	15	18	15	0.2	482.961	482.962	0.7	S14396	15.02	15.01	15.26	0.25	10000	10000	10000	10000	10000	10000	0	0	0	0	0	0	NA	NA	10000	10000	0	1	10000	10000	0	0
	143	Valerylcarnitine	144 Valerylcarnitine	C12H23NO4	[M+H]+	3.6	5.7	15	0.2	246.17	246.169	-2	S14396	4.87	4.64	5.05	0.41	1108612	764173	826764	421205	654724	633354	8520	8412	9578	6473	7779	8104	0.0634115	15.77	899850	569761	0.659327	1.57935	34433	734805	18	6
	144	Xanthine	145 Xanthine	C5H4N4O2	[M-H]-	7.5	9.4	15	0.2	151.026	151.025	-6.3	S14397	8.59	8.54	8.66	0.11	566532	459368	499463	346011	405429	402215	10513	9638	10300	9473	10101	10725	0.0279681	35.7551	508454	384552	0.402941	1.3222	40375	446503	21	6
	145	Xanthosine	146 Xanthosine	C10H12N4O6	[M-H]-	6.7	8.7	15	0.2	283.068	283.068	0	S14413	7.73	7.53	7.73	0.21	10897.5	10897.5	10897.5	10897.5	10897.5	10897.5	0	0	1795	0	0	0	NA	NA	10897.5	10897.5	0	1	10897.5	10897.5	0	0
	146	Xanthylic acid	147 Xanthylic acid	C10H13N4O9P	[M-H]-	11	13	15	0.2	363.035	363.035	0.4	S14415	11.16	11.16	11.16	0	10000	10000	10000	10000	10000	10000	0	0	0	0	0	0	NA	NA	10000	10000	0	1	10000	10000	0	0
Figure 9C
		Skeleton_Metabolite	Metabolite	Formula	Ion Type	RT Start (min)	RT End (min)	m/z Tolerance (ppm)	RT Tolerance (min)	mz	obs_mz	ppm	winner	RT	RT_min	RT_max	RT_range	WT1 Both	WT2 Both	WT3 Both	KO1 Both	KO2 Both	KO3 Both	Blank_0	Blank_1	Blank_2	Blank_3	Blank_4	Blank_5	ttest_pval	1/pvalue	WT Both_Mean	KO Both_Mean	Log2FoldChange	LogFoldChange	blank_threshold	combined_mean	impact_score	Detection
	0	1-Methylnicotinamide	1 1-Methylnicotinamide	C7H8N2O	[M+H]+	19	21	15	0.2	137.071	137.071	-0.3	S14406	20.76	20.51	21	0.49	44013.5	44013.5	44013.5	44013.5	44013.5	44013.5	13465	14960	11760	9911	9388	8543	NA	NA	44013.5	44013.5	0	1	44013.5	44013.5	0	0
	1	2,3-Diphosphoglyceric acid	2 2,3-Diphosphoglyceric acid	C3H8O10P2	[M-H]-	12	15	15	0.2	264.952	264.952	0	S14414	12.99	12.99	12.99	0	10000	10000	10000	10000	10000	10000	0	0	0	0	0	0	NA	NA	10000	10000	0	1	10000	10000	0	0
	2	3-Hydroxybutyric acid	3 3-Hydroxybutyric acid	C4H8O3	[M-H]-	5.7	7.7	15	0.2	103.04	103.039	-10.4	S14405	6.07	6.03	6.2	0.17	321621	321621	321621	321621	321621	321621	93076	99252	105272	111792	111422	102428	NA	NA	321621	321621	0	1	321621	321621	0	0
	3	3-Phosphoglyceric acid	4 3-Phosphoglyceric acid	C3H7O7P	[M-H]-	13	15	15	0.2	184.986	184.985	-4.1	S14396	13.76	13.6	14.01	0.41	79384	13310.5	21637	13310.5	13310.5	13310.5	2014	3065	0	1542	0	0	0.29856	3.34941	38110.5	13310.5	1.51762	2.86319	13310.5	25710.5	0	2
	4	4,5-Dihydroorotic acid	5 4,5-Dihydroorotic acid	C5H6N2O4	[M-H]-	7.5	9.5	15	0.2	157.025	157.024	-6.9	S14396	8.59	8.47	8.81	0.34	1717312	561759	1538214	85092	131421	353486	1963	2131	1852	1908	0	0	0.0425014	23.5286	1.27243e+06	190000	2.74352	6.697	13927	731214	115	6
	5	4-Hydroxyproline	6 4-Hydroxyproline	C5H9NO3	[M+H]+	10.2	11.2	15	0.2	132.065	132.066	3.6	S14396	10.67	10.49	10.79	0.3	169859824	129113000	114055168	89064688	122930024	124745416	157568	22099	232193	20088	269120	19813	0.278751	3.58743	1.37676e+08	1.12247e+08	0.294604	1.22655	370440	1.24961e+08	550	6
	6	5'-Methylthioadenosine	7 5'-Methylthioadenosine	C11H15N5O3S	[M+H]+	3	5	15	0.2	298.097	298.096	-2.5	S14396	4.18	4.13	4.33	0.2	4130317	1982220	2470775	703220	3423330	2044387	34769	34125	79904	52957	47998	44602	0.474352	2.10814	2861104	2056979	0.476045	1.39093	157178	2.45904e+06	7	6
	7	5-Phosphoribosylamine	8 5-Phosphoribosylamine	C5H12NO7P	[M-H]-	11.5	13.5	15	0.2	228.028	228.027	-2.5	S14407	11.62	11.62	11.62	0	10000	10000	10000	10000	10000	10000	0	0	0	0	0	0	NA	NA	10000	10000	0	1	10000	10000	0	0
	8	6-Phosphogluconic acid	9 6-Phosphogluconic acid	C6H13O10P	[M-H]-	14	17	15	0.2	275.017	275.018	3.8	S14413	14.66	14.66	14.89	0.23	10000	10000	10000	10000	10000	10000	0	0	0	0	0	0	NA	NA	10000	10000	0	1	10000	10000	0	0
	9	Acetoacetic acid	10 Acetoacetic acid	C4H6O3	[M-H]-	8.3	10.3	15	0.2	101.024	101.023	-11.1	S14419	9.57	9.36	9.81	0.46	356886	241908	241083	193542	278922	295203	17239	20659	19734	16666	20789	14620	0.653701	1.52975	279959	255889	0.129697	1.09406	64853.5	267924	0	6
	10	Acetyl-CoA	11 Acetyl-CoA	C23H38N7O17P3S	[M+H]+	8	11	15	0.2	810.133	810.126	-8.1	S14406	9.56	9.32	9.76	0.44	27943	10000	31889	10000	10000	10000	0	0	0	0	0	0	0.120006	8.33295	23277.3	10000	1.21893	2.32773	10000	16638.7	0	2
	11	Acetylcysteine	12 Acetylcysteine	C5H9NO3S	[M+H]+	6	8	15	0.2	164.038	164.037	-0.6	S14416	7.2	7.1	7.39	0.28	120082	148033	227261	80644	369819	334628	0	0	0	0	0	0	0.373958	2.6741	165125	261697	-0.664336	0.630979	10000	213411	1	6
	12	Adenine	13 Adenine	C5H5N5	[M+H]+	5	7	15	0.2	136.062	136.062	-1.3	S14421	6.15	6.08	6.2	0.13	46131828	40154232	44624096	35004848	39725748	50712872	198355	145643	261076	155858	291073	208085	0.733337	1.36363	4.36367e+07	4.18145e+07	0.0615397	1.04358	640045	42725604	61	6
	13	Adenosine	14 Adenosine	C10H13N5O4	[M+H]+	4.5	7	15	0.2	268.104	268.103	-2.7	S14421	5.81	5.68	5.88	0.2	58138084	73587744	67081708	67786016	64131832	81441632	278740	96361	347887	170435	243354	120470	0.521621	1.9171	6.62692e+07	7.11198e+07	-0.101914	0.931796	638624	6.86945e+07	141	6
	14	Adenosine diphosphate ribose	15 Adenosine diphosphate ribose	C15H23N5O14P2	[M-H]-	10.9	12.9	15	0.2	558.064	558.065	1.6	S14396	11.73	11.65	11.74	0.09	1054224	596982	550175	429119	804984	963238	0	0	0	0	0	0	0.995525	1.0045	733794	732447	0.00265008	1.00184	10000	733120	1	6
	15	Adenosine monophosphate	16 Adenosine monophosphate	C10H14N5O7P	[M+H]+	9.8	11.8	15	0.2	348.07	348.07	-2.5	S14396	10.73	10.49	10.78	0.28	27342494	15872592	19262602	10919575	14795735	25160636	366872	101064	523627	165335	372653	132992	0.516747	1.93518	20825896	1.69586e+07	0.296357	1.22804	841272	1.88923e+07	45	6
	16	Adenosine triphosphate	17 Adenosine triphosphate	C10H16N5O13P3	[M-H]-	12.5	14.5	15	0.2	505.988	505.989	0.8	S14396	13.3	13.2	13.55	0.35	182302	17022.5	27375	17022.5	41338	17022.5	3262	3489	2499	2523	2272	0	0.403649	2.4774	75566.5	25127.7	1.58847	3.0073	17022.5	50347.1	0	3
	17	Adenylsuccinic acid	18 Adenylsuccinic acid	C14H18N5O11P	[M-H]-	14.5	16.5	15	0.2	462.067	462.067	0.7	S14396	15.1	15.1	15.1	0	10000	10000	10000	10000	10000	10000	0	0	0	0	0	0	NA	NA	10000	10000	0	1	10000	10000	0	0
	18	ADP	19 ADP	C10H15N5O10P2	[M-H]-	11.1	13.1	15	0.2	426.022	426.022	0.4	S14396	11.94	11.73	12.18	0.46	535610	36093	92295	29917	122220	71384	4551	3394	9554	5958	5187	2418	0.411289	2.43138	221333	74507	1.57077	2.97063	25531	147920	1	6
	19	Allantoin	20 Allantoin	C4H6N4O3	[M-H]-	9.3	11.3	15	0.2	157.037	157.036	-6.5	S14396	10.4	10.17	10.42	0.26	879160	399457	641664	461669	640207	724391	9742	9366	7912	8632	6009	5865	0.853063	1.17225	640094	608756	0.0724197	1.05148	33763	624425	1	6
	20	Aminoadipic acid	21 Aminoadipic acid	C6H11NO4	[M-H]-	5.9	7.9	15	0.2	160.061	160.06	-6.5	S14396	7.26	7.18	7.33	0.15	454988	317132	332135	191807	330301	328756	7331	7261	7767	6624	6651	6944	0.253364	3.9469	368085	283621	0.376073	1.2978	31289	325853	2	6
	21	Argininosuccinic acid	22 Argininosuccinic acid	C10H18N4O6	[M-H]-	12.5	14.5	15	0.2	289.115	289.115	-0.6	S14396	13.37	13.34	13.44	0.1	160664	80927	85573	25568	91276	63381	0	0	1993	0	0	0	0.20171	4.95762	109055	60075	0.860215	1.81531	10996.5	84564.8	1	6
	22	Beta-Alanine	23 Beta-Alanine	C3H7NO2	[M+H]+	9.8	10.5	15	0.2	90.055	90.0555	6	S14396	10.22	10.15	10.29	0.15	1495918	1238035	1083256	659893	1203730	1071910	37374	41810	51416	44178	57362	63616	0.221732	4.50995	1272403	978511	0.378896	1.30035	157878	1125457	7	6
	23	Betaine	24 Betaine	C5H11NO2	[M+H]+	7	8.2	15	0.2	118.086	118.087	2.1	S14419	7.82	7.77	7.86	0.09	136101856	92815208	96229928	58357216	111953360	153833904	792370	726656	808142	775922	906214	825538	0.991897	1.00817	1.08382e+08	108048160	0.00445507	1.00309	2427421	1.08215e+08	109	6
	24	Butyrylcarnitine	25 Butyrylcarnitine	C11H21NO4	[M+H]+	4.2	6.2	15	0.2	232.154	232.154	-1.4	S14396	5.6	5.35	5.8	0.45	7556898	5174206	4772499	2885592	4876833	4804417	13029	8168	12348	7167	7406	8333	0.204406	4.89223	5.83453e+06	4.18895e+06	0.47803	1.39284	38225.5	5.01174e+06	34	6
	25	Carbamoyl phosphate	26 Carbamoyl phosphate	CH4NO5P	[M-H]-	27	30	15	0.2	139.975	139.975	-6.7	S14420	27.14	27.03	27.38	0.35	43134	43134	43134	43134	43134	43134	9118	9671	12234	10877	11536	12832	NA	NA	43134	43134	0	1	43134	43134	0	0
	26	Carnosine	27 Carnosine	C9H14N4O3	[M+H]+	10.6	12.6	15	0.2	227.114	227.113	-1.6	S14397	11.62	11.51	11.66	0.16	12295.5	62056	80621	70624	81639	95344	0	0	0	0	0	4591	0.226321	4.4185	51657.5	82535.7	-0.67604	0.625881	12295.5	67096.6	0	5
	27	CDP	28 CDP	C9H15N3O11P2	[M+H]+	13	15	15	0.2	404.026	404.025	-1.1	S14396	13.8	13.8	14.03	0.23	29905	14101	14101	14101	14101	14101	3103	0	2577	2522	0	0	0.373901	2.6745	19369	14101	0.457952	1.37359	14101	16735	0	1
	28	Choline	29 Choline	C5H14NO	[Cat]+	11	15	15	0.2	104.107	104.107	2	S14401	12.79	12.77	12.95	0.19	96056392	184779936	95998408	133629912	156996224	153245168	595216	513419	1061739	670693	1124359	730914	0.503849	1.98472	1.25612e+08	1.47957e+08	-0.236209	0.848973	2358170	136784340	320	6
	29	cis-Aconitic acid	30 cis-Aconitic acid	C6H6O6	[M-H]-	14.1	16.1	15	0.2	173.009	173.008	-5.6	S14396	14.84	14.79	14.9	0.11	4722035	2660146	3289736	923504	3225327	2037920	39336	14591	90842	27291	67847	29645	0.172814	5.78657	3.55731e+06	2.06225e+06	0.786565	1.72496	144776	2809778	28	6
	30	Citric acid	31 Citric acid	C6H8O7	[M-H]-	14.2	16.2	15	0.2	191.02	191.019	-4.9	S14396	15.33	15.09	15.5	0.41	11478462	899740	3436092	530144	2065486	1873662	48251	36912	38748	22529	9730	6181	0.306031	3.26764	5.27143e+06	1489764	1.82311	3.53843	91175.5	3.3806e+06	39	6
	31	Citrulline	32 Citrulline	C6H13N3O3	[M+H]+	10.9	12.9	15	0.2	176.103	176.103	-0.4	S14397	11.92	11.87	11.97	0.1	2260911	1957449	1999898	2045781	1747795	1646454	130346	114090	106736	109557	113664	107830	0.164909	6.06395	2.07275e+06	1.81334e+06	0.192896	1.14306	351112	1943048	13	6
	32	Creatine	33 Creatine	C4H9N3O2	[M+H]+	10	11.5	15	0.2	132.077	132.076	-2.7	S14394	10.72	10.67	10.76	0.09	91949816	72353816	76823696	58785272	83309000	90821968	102564	113799	133180	91551	162779	98566	0.821229	1.21769	80375776	7.76387e+07	0.0499839	1.03525	361220	7.90073e+07	100	6
	33	Creatinine	34 Creatinine	C4H7N3O	[M+H]+	5.2	7.2	15	0.2	114.066	114.066	1.9	S14420	6.47	6.41	6.5	0.09	34187284	25005288	26870860	17530352	26770978	24473168	130348	151946	160577	140858	167498	164364	0.217894	4.5894	2.86878e+07	2.29248e+07	0.323527	1.25139	467796	2.58063e+07	148	6
	34	Cyclic AMP	35 Cyclic AMP	C10H12N5O6P	[M-H]-	5.8	7.8	15	0.2	328.045	328.045	0.5	S14401	6.95	6.83	6.98	0.15	57841	60067	53169	36861	43579	53053	0	1670	0	0	0	0	0.0705988	14.1645	57025.7	44497.7	0.357882	1.28154	10835	50761.7	1	6
	35	Cytidine	36 Cytidine	C9H13N3O5	[M+H]+	7.1	9.1	15	0.2	244.093	244.093	-0.8	S14401	8.28	8.03	8.42	0.39	746690	1078209	668055	733461	802341	979836	17784	12327	25280	20847	24859	21923	0.961056	1.04052	830985	838546	-0.0130681	0.990983	71510	834765	1	6
	36	Cytidine monophosphate	37 Cytidine monophosphate	C9H14N3O8P	[M+H]+	11.8	13.8	15	0.2	324.059	324.058	-2.6	S14396	12.97	12.72	12.97	0.25	503395	264328	288848	137225	271229	228927	13563	14172	31833	24885	30556	26721	0.178002	5.6179	352190	212460	0.729162	1.65768	80865	282325	3	6
	37	Cytidine triphosphate	38 Cytidine triphosphate	C9H16N3O14P3	[M-H]-	15	20	15	0.2	481.977	481.978	2.6	S14396	15.29	15.29	15.51	0.23	10000	10000	10000	10000	10000	10000	0	0	0	0	0	0	NA	NA	10000	10000	0	1	10000	10000	0	0
	38	Cytosine	39 Cytosine	C4H5N3O	[M+H]+	9	11	15	0.2	112.05	112.051	2.3	S14406	9.32	9.13	9.56	0.43	176672	176672	176672	176672	176672	176672	48006	53973	58902	55478	55966	61019	NA	NA	176672	176672	0	1	176672	176672	0	0
	39	D-2-Hydroxyglutaric acid	40 D-2-Hydroxyglutaric acid	C5H8O5	[M-H]-	11.6	13.6	15	0.2	147.03	147.029	-6.8	S14396	12.19	12.14	12.23	0.09	4659738	3425057	3616392	2455097	3315753	4256851	229855	211004	211241	200397	197295	194993	0.436858	2.28907	3.9004e+06	3342567	0.222664	1.16689	632392	3.62148e+06	10	6
	40	D-Glucose	41 D-Glucose	C6H12O6	[M-H]-	9	11	15	0.2	179.056	179.055	-4.5	S14397	10.98	10.74	11.02	0.28	218624	244099	153660	205900	193466	174599	23316	35852	13508	8084	10053	11895	0.644937	1.55054	205461	191322	0.102864	1.0739	61354	198391	0	6
	41	D-Glyceraldehyde 3-phosphate	42 D-Glyceraldehyde 3-phosphate	C3H7O6P	[M-H]-	13	14	15	0.2	168.991	168.99	-6.8	S14396	13.01	13	13.24	0.24	22478	10000	10000	10000	10000	10000	0	0	0	0	0	0	0.373901	2.6745	14159.3	10000	0.501753	1.41593	10000	12079.7	0	1
	42	Dihydrofolic acid	43 Dihydrofolic acid	C19H21N7O6	[M+H]+	13	16	15	0.2	444.163	444.166	8.8	S14411	13	13	13.23	0.23	10000	10000	10000	10000	10000	10000	0	0	0	0	0	0	NA	NA	10000	10000	0	1	10000	10000	0	0
	43	Dihydroxyacetone phosphate	44 Dihydroxyacetone phosphate	C3H7O6P	[M-H]-	12	13	15	0.2	168.991	168.99	-5.6	S14396	12.88	12.66	12.99	0.33	69714	10000	21326	10000	17680	10000	0	0	0	0	0	0	0.317069	3.15389	33680	12560	1.42306	2.68153	10000	23120	0	3
	44	D-Ribose 5-phosphate	45 D-Ribose 5-phosphate	C5H11O8P	[M-H]-	12.4	13.8	15	0.2	229.012	229.011	-2.5	S14396	12.61	12.45	12.66	0.21	251408	100949	131402	63962	130445	152950	9074	2363	9707	3921	5518	2691	0.440364	2.27085	161253	115786	0.477869	1.39269	26637	138519	0	6
	45	D-Sedoheptulose 7-phosphate	46 D-Sedoheptulose 7-phosphate	C7H15O10P	[M-H]-	12.2	14.2	15	0.2	289.033	289.033	0	S14396	13.03	12.96	13.24	0.28	46841	19421	30336	10821	30274	16954	0	0	1642	0	0	0	0.260942	3.83227	32199.3	19349.7	0.734722	1.66408	10821	25774.5	0	5
	46	dTDP	47 dTDP	C10H16N2O11P2	[M-H]-	11	13	15	0.2	401.016	401.013	-5.6	S14416	12.08	12.08	12.33	0.25	10000	10000	10000	10000	10000	10000	0	0	0	0	0	0	NA	NA	10000	10000	0	1	10000	10000	0	0
	47	FAD	48 FAD	C27H33N9O15P2	[M+H]+	7.6	9.6	15	0.2	786.164	786.161	-4.2	S14396	8.67	8.51	8.84	0.33	39331	20361	32769	13011	36602	26030	0	0	0	0	0	0	0.558832	1.78945	30820.3	25214.3	0.289638	1.22233	10000	28017.3	0	6
	48	Folic acid	49 Folic acid	C19H19N7O6	[M+H]+	13	16	15	0.2	442.147	442.146	-1.9	S14397	13.72	13.72	13.95	0.23	10000	10000	10000	10000	10000	10000	0	0	0	0	0	0	NA	NA	10000	10000	0	1	10000	10000	0	0
	49	Fructose 1,6-bisphosphate	50 Fructose 1,6-bisphosphate	C6H14O12P2	[M-H]-	14.1	16.1	15	0.2	338.989	338.989	0.1	S14396	14.77	14.67	15.02	0.34	18127	18127	18127	18127	18127	18127	6826	4726	2118	2584	0	0	NA	NA	18127	18127	0	1	18127	18127	0	0
	50	Fructose 6-phosphate	51 Fructose 6-phosphate	C6H13O9P	[M-H]-	12.6	13.5	15	0.2	259.022	259.022	-1	S14396	13.49	13.45	13.5	0.05	223872	97345	154431	61013	203640	135062	11998	0	11436	2425	8659	3738	0.669746	1.4931	158549	133238	0.250923	1.18997	29128	145894	0	6
	51	Fumaric acid	52 Fumaric acid	C4H4O4	[M-H]-	12.2	14.2	15	0.2	115.004	115.002	-10.3	S14396	12.96	12.85	13	0.15	5904062	3714198	3640518	1662728	3508472	2955387	52793	39348	71865	41432	53519	40914	0.137185	7.28945	4.41959e+06	2.70886e+06	0.706226	1.63153	159936	3.56423e+06	42	6
	52	Glucose 6-phosphate	53 Glucose 6-phosphate	C6H13O9P	[M-H]-	13.6	14.4	15	0.2	259.022	259.022	-1	S14396	13.6	13.6	13.7	0.1	192806	118194	106376	50992	182885	178089	7649	0	9703	4038	9923	2902	0.973468	1.02726	139125	137322	0.0188224	1.01313	27107.5	138224	0	6
	53	Glutathione	54 Glutathione	C10H17N3O6S	[M+H]+	10	13	15	0.2	308.091	308.091	-1.9	S14396	11.45	11.2	11.69	0.49	74196	40103	40103	40103	40103	40103	10010	10356	10537	10029	9547	9727	0.373901	2.6745	51467.3	40103	0.359947	1.28338	40103	45785.2	0	1
	54	Glycerol 3-phosphate	55 Glycerol 3-phosphate	C3H9O6P	[M-H]-	11.5	13	15	0.2	171.006	171.005	-5.9	S14396	11.86	11.73	11.95	0.22	1147476	645681	697000	425779	933168	909151	11068	2716	18637	4700	16503	5002	0.763324	1.31006	830052	756033	0.134754	1.09791	39313	793042	1	6
	55	Glycine	56 Glycine	C2H5NO2	[M+H]+	10.7	12.7	15	0.2	76.0393	76.04	9.1	S14420	11.73	11.65	11.74	0.09	6178646	6831492	5370010	6203392	5917863	6363498	68177	24394	69611	27213	76676	26858	0.940955	1.06275	6126716	6.16158e+06	-0.00818738	0.994341	156464	6.14415e+06	7	6
	56	Guanidoacetic acid	57 Guanidoacetic acid	C3H7N3O2	[M+H]+	10.7	12.7	15	0.2	118.061	118.061	2.5	S14397	11.69	11.64	11.74	0.1	811396	521949	570228	543383	987449	750657	12196	11059	13292	10148	12624	10075	0.46581	2.1468	634524	760496	-0.261266	0.834356	44697	697510	2	6
	57	Guanine	58 Guanine	C5H5N5O	[M+H]+	7.7	9.7	15	0.2	152.057	152.056	-1.2	S14396	8.51	8.44	8.63	0.19	1999087	1532055	1832605	1340236	1469069	1933980	32335	22322	39849	32073	43726	35296	0.412377	2.42497	1.78792e+06	1581095	0.177355	1.13081	112800	1.68451e+06	5	6
	58	Guanosine	59 Guanosine	C10H13N5O5	[M+H]+	7.7	9.7	15	0.2	284.099	284.098	-2.6	S14421	8.87	8.74	8.92	0.17	394584	364187	349365	282194	343089	399905	11815	0	13667	11112	11906	6720	0.490916	2.03701	369379	341729	0.112246	1.08091	37610	355554	1	6
	59	Guanosine diphosphate	60 Guanosine diphosphate	C10H15N5O11P2	[M-H]-	13.8	15.8	15	0.2	442.017	442.017	0.1	S14396	14.79	14.79	15.04	0.24	16760	13334	13334	13334	13334	13334	0	0	4935	0	1733	0	0.373901	2.6745	14476	13334	0.118553	1.08565	13334	13905	0	1
	60	Guanosine monophosphate	61 Guanosine monophosphate	C10H14N5O8P	[M+H]+	12.6	14.6	15	0.2	364.065	364.065	-2.1	S14396	13.43	13.39	13.56	0.17	435571	155780	238481	95376	211154	270050	21643	17099	38338	32288	30830	29792	0.435726	2.29502	276611	192193	0.525298	1.43923	94995	234402	1	6
	61	Guanosine triphosphate	62 Guanosine triphosphate	C10H16N5O14P3	[M-H]-	15	17	15	0.2	521.983	521.984	1.4	S14396	16.8	16.73	16.99	0.26	10000	10000	10000	10000	10000	10000	0	0	0	0	0	0	NA	NA	10000	10000	0	1	10000	10000	0	0
	62	Homocysteine	63 Homocysteine	C4H9NO2S	[M-H]-	7.3	9.3	15	0.2	134.028	134.027	-9.1	S14421	8.56	8.45	8.65	0.2	10000	10000	10000	10000	10000	10000	0	0	0	0	0	0	NA	NA	10000	10000	0	1	10000	10000	0	0
	63	Hypotaurine	64 Hypotaurine	C2H7NO2S	[M+H]+	10	12	15	0.2	110.027	110.027	2.5	S14421	11.12	11.08	11.17	0.09	4342560	3349581	3818249	1573208	5185241	5238869	0	0	0	0	2686	0	0.902684	1.10781	3.8368e+06	3999106	-0.0597752	0.959414	11343	3.91795e+06	5	6
	64	Hypoxanthine	65 Hypoxanthine	C5H4N4O	[M+H]+	5.8	7.8	15	0.2	137.046	137.046	-0.6	S14416	7.62	7.53	7.78	0.25	2232244	7017936	1750353	2755812	8314312	2847654	15422	9350	11044	8307	10471	10744	0.716136	1.39638	3.66684e+06	4.63926e+06	-0.339355	0.790394	42669	4.15305e+06	7	6
	65	Inosine	66 Inosine	C10H12N4O5	[M+H]+	6.4	8.4	15	0.2	269.088	269.087	-2.4	S14416	7.6	7.52	7.68	0.16	690474	2268930	492450	818972	2459883	807125	0	0	0	0	0	0	0.801207	1.24812	1150618	1.36199e+06	-0.243311	0.844804	10000	1.25631e+06	2	6
	66	Inosinic acid	67 Inosinic acid	C10H13N4O8P	[M+H]+	11.4	13.4	15	0.2	349.054	349.054	-1.7	S14396	12.31	12.1	12.52	0.42	137252	53862	52261	29722	56645	68898	4281	3625	6732	5741	10236	8829	0.388111	2.57658	81125	51755	0.648448	1.56748	29722	66440	0	5
	67	L-Acetylcarnitine	68 L-Acetylcarnitine	C9H17NO4	[M+H]+	6.3	8.3	15	0.2	204.123	204.123	-1.2	S14419	7.54	7.29	7.57	0.29	58496596	38822936	37959464	29497470	48331444	54794072	16863	9154	12776	10031	10214	21950	0.934536	1.07005	4.5093e+07	44207662	0.028607	1.02003	50494	4.46503e+07	49	6
	68	L-Alanine	69 L-Alanine	C3H7NO2	[M+H]+	10.6	11.2	15	0.2	90.055	90.0554	4.9	S14396	10.87	10.81	10.89	0.08	149634288	118179248	111836384	87142656	120772936	121571640	236505	108752	274578	104529	305261	139872	0.362639	2.75756	1.2655e+08	1.09829e+08	0.204447	1.15224	594748	1.1819e+08	376	6
	69	L-Arginine	70 L-Arginine	C6H14N4O2	[M+H]+	18.5	21	15	0.2	175.119	175.119	-2	S14396	18.53	18.51	18.71	0.21	37612800	24093292	23952576	23191842	25750990	28937126	3313046	1488788	6324508	2973431	5497358	2663506	0.619523	1.61414	2.85529e+07	25959986	0.137347	1.09988	1.11403e+07	2.72564e+07	48	6
	70	L-Asparagine	71 L-Asparagine	C4H8N2O3	[M+H]+	10.3	12.3	15	0.2	133.061	133.061	-1.3	S14396	11.43	11.37	11.49	0.12	13679803	12101293	11286187	9268928	11723746	11766065	39043	5474	35196	7788	40720	7557	0.255808	3.90919	12355761	1.09196e+07	0.178267	1.13152	77889	1.16377e+07	51	6
	71	L-Aspartic acid	72 L-Aspartic acid	C4H7NO4	[M-H]-	10.8	12.8	15	0.2	132.03	132.029	-10.9	S14396	11.81	11.76	11.83	0.07	81519680	62554812	65863636	53221644	72216520	70421640	555240	27352	599397	43659	504951	31837	0.606938	1.64761	69979376	6.52866e+07	0.100143	1.07188	891218	6.7633e+07	119	6
	72	L-Carnitine	73 L-Carnitine	C7H16NO3	[Cat]+	8.3	10.3	15	0.2	162.113	162.112	-2.3	S14419	9.58	9.5	9.61	0.11	342839680	235223280	242907952	178060224	273038016	302275840	36541	33290	50699	26500	68345	30381	0.681819	1.46667	2.73657e+08	2.51125e+08	0.123965	1.08973	132878	262390832	419	6
	73	L-Cystathionine	74 L-Cystathionine	C7H14N2O4S	[M+H]+	12.2	14.2	15	0.2	223.075	223.074	-2.7	S14396	13.23	13.13	13.39	0.26	25439	17685.5	22030	17685.5	22017	21857	4385	4263	3873	0	0	2850	0.675031	1.48141	21718.2	20519.8	0.0818833	1.0584	17685.5	21119	0	4
	74	L-Cysteine	75 L-Cysteine	C3H7NO2S	[M+H]+	13	17	15	0.2	122.027	122.027	1.4	S14411	14.91	14.83	15.14	0.31	10000	10000	10000	10000	10000	10000	0	0	0	0	0	0	NA	NA	10000	10000	0	1	10000	10000	0	0
	75	L-Cystine	76 L-Cystine	C6H12N2O4S2	[M-H]-	11.7	13.7	15	0.2	239.017	239.016	-1.2	S14418	12.78	12.56	12.88	0.32	18587	27373	18587	25135	23050	28709	2340	1941	5218	1816	3810	2049	0.288137	3.47057	21515.7	25631.3	-0.252521	0.839428	18587	23573.5	0	4
	76	L-Glutamic acid	77 L-Glutamic acid	C5H9NO4	[M+H]+	10	13	15	0.2	148.06	148.06	-1.6	S14421	11.55	11.44	11.63	0.19	153279056	147889952	134464432	133020624	151914048	158072096	986252	82541	886897	96169	955059	88091	0.806364	1.24014	1.45211e+08	1.47669e+08	-0.024214	0.983356	1.5575e+06	1.4644e+08	185	6
	77	L-Glutamine	78 L-Glutamine	C5H10N2O3	[M+H]+	10.1	12.1	15	0.2	147.076	147.076	-2.9	S14396	11.19	11.13	11.24	0.11	478571264	378167488	336635104	281872416	374326272	358136992	1490954	62351	1776222	74879	2287276	78222	0.30581	3.27001	3.97791e+08	3.38112e+08	0.234511	1.17651	2894952	3.67952e+08	1416	6
	78	L-Histidine	79 L-Histidine	C6H9N3O2	[M+H]+	9.9	11.9	15	0.2	156.077	156.077	-1.6	S14396	10.7	10.65	10.76	0.11	24581852	14487091	13658631	10296940	15775001	15547985	833893	232876	723391	247784	782554	233300	0.40065	2.49595	17575858	1.38733e+07	0.341283	1.26688	1536899	1.57246e+07	50	6
	79	L-Isoleucine	80 L-Isoleucine	C6H13NO2	[M+H]+	6	7.5	15	0.2	132.102	132.102	-0.8	S14396	7.29	7.14	7.41	0.27	26867740	19871966	17541676	11408295	18870272	17648976	78492	74367	70478	79233	73501	78646	0.207793	4.81247	2.14271e+07	1.59758e+07	0.423546	1.34122	237358	1.87015e+07	121	6
	80	L-Kynurenine	81 L-Kynurenine	C10H12N2O3	[M+H]+	6	8	15	0.2	209.092	209.095	15	S14411	6.03	6.03	6.25	0.21	169379	325388	602056	960954	479873	498835	6768	6727	5695	0	6745	7367	0.236382	4.23044	365608	646554	-0.822475	0.565471	26651	506081	4	6
	81	L-Lactic acid	82 L-Lactic acid	C3H6O3	[M-H]-	6.2	8.2	15	0.2	89.0244	89.0232	-13.7	S14396	7.37	7.35	7.44	0.09	6360899	4875252	4875252	4875252	4875252	4875252	1865850	1800302	1549478	1567628	1466033	1481213	0.373901	2.6745	5.37047e+06	4875252	0.139571	1.10158	4875252	5.12286e+06	15	1
	82	L-Leucine	83 L-Leucine	C6H13NO2	[M+H]+	7.5	9	15	0.2	132.102	132.102	-1.6	S14396	7.68	7.68	7.8	0.12	27752368	23456816	21048882	12574221	20395946	18615216	106187	94095	111825	96936	115014	95497	0.0884192	11.3098	24086022	1.71951e+07	0.486196	1.40075	319777	2.06406e+07	327	6
	83	L-Lysine	84 L-Lysine	C6H14N2O2	[M+H]+	18	20	15	0.2	147.113	147.113	-1.4	S14396	18.02	18	18.08	0.08	429557	232187	202619	268748	265806	403953	39223	16920	42787	21533	37253	20276	0.784608	1.27452	288121	312836	-0.11873	0.920998	98996	300478	0	6
	84	L-Malic acid	85 L-Malic acid	C4H6O5	[M-H]-	12.2	14.2	15	0.2	133.014	133.013	-10.9	S14396	12.96	12.9	13	0.11	66135604	40272768	41723428	18465304	41448192	33803972	465780	265447	690538	344216	569526	234093	0.16752	5.96944	4.93773e+07	31239156	0.660492	1.58062	1294800	4.03082e+07	380	6
	85	L-Methionine	86 L-Methionine	C5H11NO2S	[M+H]+	6.8	8.8	15	0.2	150.058	150.058	-0.8	S14396	8.01	7.95	8.08	0.14	10145158	7999736	7445432	4766626	7486218	7171448	12933	7753	13317	8193	14877	7297	0.159126	6.28432	8.53011e+06	6474764	0.397737	1.31744	42185	7.50244e+06	62	6
	86	L-Phenylalanine	87 L-Phenylalanine	C9H11NO2	[M+H]+	5.6	7.6	15	0.2	166.086	166.086	-1.5	S14396	6.79	6.77	7.04	0.27	16832780	12036351	11119930	6958539	11669327	10345334	93644	93218	99615	76312	106462	102934	0.179465	5.57213	13329687	9.65773e+06	0.464886	1.38021	296092	1.14937e+07	88	6
	87	L-Proline	88 L-Proline	C5H9NO2	[M+H]+	7.9	9.9	15	0.2	116.071	116.071	0.8	S14396	9.07	9.05	9.14	0.09	346767328	271270368	276772096	162281312	273160000	259500800	652448	616968	647406	582075	747051	639295	0.192316	5.19978	2.9827e+08	2.31647e+08	0.364688	1.2876	1.95262e+06	2.64959e+08	1774	6
	88	L-Serine	89 L-Serine	C3H7NO3	[M+H]+	10.8	12.8	15	0.2	106.05	106.05	3.1	S14396	11.85	11.8	11.91	0.11	6548868	5478180	4924776	4625185	4987754	5484247	120885	69191	84513	56985	84049	58083	0.314403	3.18063	5650608	5.0324e+06	0.167161	1.12285	246853	5.3415e+06	19	6
	89	L-Threonine	90 L-Threonine	C4H9NO3	[M-H]-	9.5	11.5	15	0.2	118.051	118.05	-9.9	S14396	10.68	10.64	10.75	0.11	2364774	1214449	1338381	1361722	1562878	1854911	30955	26740	29924	24730	21603	17447	0.912105	1.09636	1.6392e+06	1.59317e+06	0.0410925	1.02889	85699.5	1.61619e+06	2	6
	90	L-Tryptophan	91 L-Tryptophan	C11H12N2O2	[M+H]+	6.8	8.8	15	0.2	205.097	205.097	-1.2	S14396	8.01	7.87	8.07	0.2	1480648	1089384	967132	700066	1104835	962972	14894	12207	12549	11236	13102	9638	0.258928	3.86207	1.17905e+06	922624	0.353815	1.27794	46813	1.05084e+06	5	6
	91	L-Tyrosine	92 L-Tyrosine	C9H11NO3	[M+H]+	8.2	10.2	15	0.2	182.081	182.081	-1.5	S14396	9.32	9.27	9.39	0.13	10232425	7194212	6423858	4559100	7106032	6759890	54583	43007	56996	39997	49192	44505	0.268872	3.71925	7950165	6141674	0.372353	1.29446	154140	7.04592e+06	34	6
	92	L-Valine	93 L-Valine	C5H11NO2	[M+H]+	8.3	9.2	15	0.2	118.086	118.086	1.2	S14396	8.86	8.83	8.92	0.1	11119255	9021056	8516032	6277830	9568109	9127726	162315	158286	175538	156661	183533	176184	0.399591	2.50256	9.55211e+06	8324555	0.198447	1.14746	516258	8.93833e+06	26	6
	93	N6-Acetyl-L-lysine	94 N6-Acetyl-L-lysine	C8H16N2O3	[M+H]+	1.9	3.9	15	0.2	189.123	189.122	-8.8	S14409	3	2.98	3.05	0.07	48821410	48821410	48821410	48821410	48821410	48821410	17259462	14886605	17054746	15496781	16539716	16385510	NA	NA	48821410	48821410	0	1	48821410	48821410	0	0
	94	N-Acetylglutamic acid	95 N-Acetylglutamic acid	C7H11NO5	[M+H]+	10.3	12.3	15	0.2	190.071	190.071	-1.6	S14401	11.28	11.04	11.46	0.42	127322	133848	128269	104765	93634	94783	8307	5994	6823	6628	8825	7722	0.00141147	708.483	129813	97727.3	0.409601	1.32832	32149.5	113770	107	6
	95	N-Acetylglutamine	96 N-Acetylglutamine	C7H12N2O4	[M-H]-	6.8	8.8	15	0.2	187.072	187.072	-4.4	S14396	8.02	7.83	8.2	0.37	387495	233504	281741	153025	210768	260130	3012	1865	0	0	0	2856	0.166381	6.01029	300913	207974	0.532943	1.44688	13866.5	254444	2	6
	96	N-Acetyl-L-alanine	97 N-Acetyl-L-alanine	C5H9NO3	[M+H]+	6	7	15	0.2	132.065	132.065	-0.2	S14396	6.9	6.65	6.98	0.33	516552	339745	349678	225402	355745	348451	17213	25738	22648	19986	16539	26132	0.265664	3.76415	401992	309866	0.375521	1.29731	74128	355929	2	6
	97	N-Acetyl-L-methionine	98 N-Acetyl-L-methionine	C7H13NO3S	[M+H]+	3	5	15	0.2	192.069	192.069	-1.5	S14396	4.76	4.51	4.96	0.44	53605	43434	36929	23318	43050	44571	0	0	0	0	0	0	0.412015	2.4271	44656	36979.7	0.272122	1.20758	10000	40817.8	0	6
	98	N-Acetyl-L-phenylalanine	99 N-Acetyl-L-phenylalanine	C11H13NO3	[M+H]+	2.8	4	15	0.2	208.097	208.096	-1.5	S14410	3.32	3.26	3.32	0.06	1314822	1314822	1314822	1314822	1314822	1314822	467955	405430	461749	409983	446824	417703	NA	NA	1314822	1314822	0	1	1314822	1314822	0	0
	99	N-Acetylornithine	100 N-Acetylornithine	C7H14N2O3	[M+H]+	8.6	10.6	15	0.2	175.108	175.108	-0.7	S14396	9.78	9.67	9.93	0.26	1632224	1036947	894257	573081	905060	901613	6847	11140	9857	9085	6861	10042	0.191602	5.21916	1.18781e+06	793251	0.582453	1.49739	36916	990530	8	6
	100	N-Acetylserine	101 N-Acetylserine	C5H9NO4	[M-H]-	7.5	8.5	15	0.2	146.046	146.045	-7.4	S14396	8.25	8.2	8.29	0.09	1592306	1033517	1119869	556287	1165821	1086660	22611	19981	22706	20668	20723	20089	0.293389	3.40845	1248564	936256	0.415295	1.33357	73389	1092410	5	6
	101	NAD	102 NAD	C21H28N7O14P2	[Cat]+	9.9	11.9	15	0.2	664.116	664.116	-1.1	S14396	10.83	10.76	10.87	0.1	5893406	3044282	3927748	1448887	2708258	2145006	0	0	4451	3987	0	3455	0.0756016	13.2272	4.28848e+06	2100717	1.02958	2.04144	15946.5	3.1946e+06	86	6
	102	NADH	103 NADH	C21H29N7O14P2	[M-H]-	9.5	11.5	15	0.2	664.117	664.108	-14.5	S14396	10.84	10.78	11.02	0.24	55164	33892	45430	12977	28769	24603	0	0	0	0	0	0	0.0428541	23.335	44828.7	22116.3	1.01931	2.02695	10000	33472.5	2	6
	103	NADP	104 NADP	C21H29N7O17P3	[Cat]+	12.7	14.7	15	0.2	744.083	744.083	0.1	S14396	13.52	13.43	13.73	0.3	77616	10000	10000	10000	13871	10000	0	0	0	0	0	0	0.399889	2.5007	32538.7	11290.3	1.52707	2.88199	10000	21914.5	0	2
	104	NADPH	105 NADPH	C21H30N7O17P3	[M-H]-	13	15	15	0.2	744.084	744.087	3.8	S14396	13.94	13.94	14.13	0.18	11634	10000	10000	10000	10000	10000	0	0	0	0	0	0	0.373901	2.6745	10544.7	10000	0.0765135	1.05447	10000	10272.3	0	1
	105	Niacinamide	106 Niacinamide	C6H6N2O	[M+H]+	3.3	5.3	15	0.2	123.055	123.055	-0.7	S14396	4.52	4.46	4.55	0.09	288376320	240267472	201535104	180509424	244053328	276105088	416354	331090	1181418	703527	706611	457115	0.806944	1.23924	2.43393e+08	2.33556e+08	0.0595193	1.04212	1.90806e+06	238474456	308	6
	106	Nicotinic acid	107 Nicotinic acid	C6H5NO2	[M-H]-	5.5	7.5	15	0.2	122.025	122.024	-8.6	S14394	5.7	5.48	5.94	0.46	75478	75478	75478	75478	75478	75478	23743	22832	20371	19219	22911	21880	NA	NA	75478	75478	0	1	75478	75478	0	0
	107	O-Phosphoethanolamine	108 O-Phosphoethanolamine	C2H8NO4P	[M+H]+	11.4	13.4	15	0.2	142.026	142.026	-0.5	S14396	12.49	12.49	12.74	0.25	8869318	2105056	3421310	1116890	5440295	3536620	15585	5001	123307	32162	100838	26629	0.585231	1.70873	4.79856e+06	3.3646e+06	0.512166	1.42619	161761	4.08158e+06	10	6
	108	Ornithine	109 Ornithine	C5H12N2O2	[M+H]+	17	19	15	0.2	133.097	133.097	1.1	S14413	17.03	17	17.2	0.2	100331	59279	59279	59279	59279	61691	40747	15664	14285	8880	10866	8116	0.40061	2.49619	72963	60083	0.280208	1.21437	59279	66523	0	2
	109	Orotic acid	110 Orotic acid	C5H4N2O4	[M-H]-	6.7	8.7	15	0.2	155.01	155.009	-6.7	S14396	7.77	7.62	7.87	0.25	1966792	1648153	1411567	152917	437599	362722	2490	3163	3165	2755	4716	2760	0.00172636	579.252	1675504	317746	2.39865	5.27309	19524.5	996625	3044	6
	110	Orotidylic acid	111 Orotidylic acid	C10H13N2O11P	[M+H]+	0	30	15	0.2	369.033	369.038	12.8	S14423	2.77	2.7	2.89	0.18	125828	125828	125828	125828	125828	125828	55701	59771	52963	36160	27061	0	NA	NA	125828	125828	0	1	125828	125828	0	0
	111	Oxidized glutathione	112 Oxidized glutathione	C20H32N6O12S2	[M+H]+	13.5	15.5	15	0.2	613.159	613.159	-1.1	S14396	14.34	14.3	14.43	0.13	5287487	1944771	2508168	1599680	2864847	2799905	58139	21232	111525	28975	106032	28204	0.499211	2.00316	3.24681e+06	2.42148e+06	0.423135	1.34084	187054	2834143	8	6
	112	Oxoadipic acid	113 Oxoadipic acid	C6H8O5	[M-H]-	7.5	9.5	15	0.2	159.03	159.029	-6.3	S14423	7.55	7.55	7.62	0.07	27236	27236	27236	27236	27236	27236	5366	4773	6336	5954	5938	6105	NA	NA	27236	27236	0	1	27236	27236	0	0
	113	Oxoglutaric acid	114 Oxoglutaric acid	C5H6O5	[M-H]-	10.8	14.8	15	0.2	145.014	145.013	-7.9	S14396	12.55	12.47	12.61	0.13	3420160	1845269	2583626	659547	2320292	1520105	122454	119893	119042	110486	105823	109883	0.166497	6.00612	2.61635e+06	1.49998e+06	0.802612	1.74426	353790	2.05817e+06	22	6
	114	Palmitic acid	115 Palmitic acid	C16H32O2	[M-H]-	1.6	3.6	15	0.2	255.233	255.232	-1.8	S14407	2.72	2.65	2.79	0.14	3572584	1999093	2796298	1999093	5057749	3781236	691087	739416	767927	485622	686998	607136	0.4551	2.19732	2789325	3.61269e+06	-0.373158	0.77209	1999093	3.20101e+06	9	4
	115	Pantothenic acid	116 Pantothenic acid	C9H17NO5	[M+H]+	5.1	7.1	15	0.2	220.118	220.117	-2.5	S14396	6.38	6.21	6.45	0.24	74244016	59271084	58126884	37589064	57484024	48058524	12280	7052	9224	8247	10204	10700	0.105066	9.51785	6.38807e+07	4.77105e+07	0.421071	1.33892	38853.5	5.57956e+07	711	6
	116	Phenol	117 Phenol	C6H6O	[M-H]-	2.1	4.1	15	0.2	93.0346	93.0334	-12.8	S14409	3.23	3.23	3.28	0.05	19109595	19109595	19109595	19109595	19109595	19109595	6824122	6085866	6206328	6601704	6191696	6289474	NA	NA	19109595	19109595	0	1	19109595	19109595	0	0
	117	Phosphocreatine	118 Phosphocreatine	C4H10N3O5P	[M-H]-	11.2	13.2	15	0.2	210.029	210.028	-3.5	S14396	12.03	11.96	12.13	0.16	47090	10000	17206	10000	30791	16998	0	0	0	0	0	0	0.691515	1.4461	24765.3	19263	0.36249	1.28564	10000	22014.2	0	4
	118	Phosphoenolpyruvic acid	119 Phosphoenolpyruvic acid	C3H5O6P	[M-H]-	13.6	15.6	15	0.2	166.975	166.974	-6	S14396	14.28	14.24	14.46	0.22	193064	40333	63228	20172.5	71724	30116	4325	2766	3510	3739	3423	2582	0.310004	3.22576	98875	40670.8	1.28161	2.4311	20172.5	69772.9	1	5
	119	Phosphoribosyl pyrophosphate	120 Phosphoribosyl pyrophosphate	C5H13O14P3	[M-H]-	15	18	15	0.2	388.945	388.942	-7.1	S14398	17.54	17.54	17.54	0	10000	10000	10000	10000	10000	10000	0	0	0	0	0	0	NA	NA	10000	10000	0	1	10000	10000	0	0
	120	Phosphorylcholine	121 Phosphorylcholine	C5H14NO4P	[M+H]+	10	13	15	0.2	184.073	184.073	-2.8	S14396	11.62	11.58	11.72	0.14	955133120	625246336	684397120	403712288	688753792	598835648	2699463	237796	6154199	1076817	4711066	756904	0.220777	4.52946	7.54926e+08	5.63767e+08	0.421235	1.33907	7.82812e+06	659346384	3999	6
	121	Phosphoserine	122 Phosphoserine	C3H8NO6P	[M+H]+	11.5	13.5	15	0.2	186.016	186.016	-1.6	S14396	13.14	12.93	13.28	0.35	378996	28664	68756	15576.5	115960	36445	0	0	6440	2791	0	1922	0.421285	2.37369	158805	55993.8	1.50392	2.83612	15576.5	107400	1	5
	122	Pipecolic acid	123 Pipecolic acid	C6H11NO2	[M+H]+	7.5	9.5	15	0.2	130.086	130.086	-0.4	S14396	7.66	7.52	7.87	0.36	411548	322411	361457	231362	346371	275723	43950	36414	37467	36584	30418	30640	0.129052	7.74884	365139	284485	0.36009	1.28351	117736	324812	3	6
	123	Propionylcarnitine	124 Propionylcarnitine	C10H19NO4	[M+H]+	5.2	7.2	15	0.2	218.139	218.138	-0.9	S14419	6.45	6.38	6.7	0.32	5817862	3793707	4588818	2875568	4792867	4504832	11710	11169	9002	9984	9702	9681	0.465473	2.14835	4.73346e+06	4.05776e+06	0.222214	1.16652	40624	4395609	11	6
	124	Pyruvic acid	125 Pyruvic acid	C3H4O3	[M-H]-	5.5	7.5	15	0.2	87.0088	87.0077	-12.3	S14397	6.23	6.06	6.23	0.16	194611	235131	172220	153182	190640	216153	47241	48063	50177	47543	44097	49242	0.618262	1.61744	200654	186658	0.104311	1.07498	153182	193656	0	5
	125	Ribose 1-phosphate	126 Ribose 1-phosphate	C5H11O8P	[M-H]-	11	12.4	15	0.2	229.012	229.011	-2.1	S14396	12.39	12.29	12.4	0.11	112125	57705	49429	35704	54746	81642	3310	0	3838	2232	2648	1855	0.544243	1.83741	73086.3	57364	0.349456	1.27408	16941.5	65225.2	0	6
	126	Saccharopine	127 Saccharopine	C11H20N2O6	[M-H]-	11	14	15	0.2	275.125	275.128	12.5	S14417	11.63	11.63	11.87	0.24	10000	10000	10000	10000	10000	10000	0	0	0	0	0	0	NA	NA	10000	10000	0	1	10000	10000	0	0
	127	S-Adenosylhomocysteine	128 S-Adenosylhomocysteine	C14H20N6O5S	[M-H]-	8.6	10.6	15	0.2	383.114	383.114	0.2	S14396	9.7	9.64	9.76	0.12	36899	23690	28611	16585	29201	33401	0	0	0	0	0	0	0.627212	1.59436	29733.3	26395.7	0.17178	1.12645	10000	28064.5	0	6
	128	S-Adenosylmethionine	129 S-Adenosylmethionine	C15H22N6O5S	[M+H]+	10.7	12.7	15	0.2	399.144	399.144	-2.3	S14396	11.91	11.77	12.09	0.32	4092220	1751911	2915669	1173223	3313172	2390154	43773	36310	120941	64376	46586	28428	0.531117	1.88282	2.91993e+06	2292183	0.349213	1.27387	180207	2.60606e+06	6	6
	129	Sarcosine	130 Sarcosine	C3H7NO2	[M+H]+	11.2	12	15	0.2	90.055	90.0555	6	S14396	11.36	11.31	11.41	0.11	15473783	14233559	13104644	9868263	14198962	14160151	61278	53282	77758	62731	107293	69786	0.391367	2.55515	14270662	1.27425e+07	0.163409	1.11993	226064	1.35066e+07	39	6
	130	Succinic acid	131 Succinic acid	C4H6O4	[M-H]-	11.3	13.3	15	0.2	117.019	117.018	-9.7	S14396	12.17	12.13	12.21	0.07	1580736	1380797	1225430	1091391	1245792	1412553	353953	320805	331510	349420	331717	317082	0.351953	2.84129	1.39565e+06	1249912	0.159115	1.1166	1.01224e+06	1.32278e+06	4	6
	131	Taurine	132 Taurine	C2H7NO3S	[M-H]-	10.2	12.2	15	0.2	124.007	124.006	-10.4	S14394	11.46	11.29	11.48	0.19	89772024	77257432	74907224	64694572	75560664	81625120	26155	6790	34434	8558	46670	9980	0.379193	2.63718	80645560	7.39601e+07	0.124848	1.09039	76293.5	7.73028e+07	222	6
	132	Thymidine	133 Thymidine	C10H14N2O5	[M-H]-	3.5	5.5	15	0.2	241.083	241.083	-1.2	S14422	4.57	4.41	4.62	0.22	31612	31612	31612	31612	31612	31612	11390	14427	4218	3873	4360	4956	NA	NA	31612	31612	0	1	31612	31612	0	0
	133	Uracil	134 Uracil	C4H4N2O2	[M+H]+	5.4	7.4	15	0.2	113.035	113.035	3.9	S14399	6.68	6.52	6.92	0.4	49772	81676	55634	55395	58492	68169	5823	4586	5665	5614	6662	4782	0.881328	1.13465	62360.7	60685.3	0.0392885	1.02761	26566	61523	0	6
	134	Ureidopropionic acid	135 Ureidopropionic acid	C4H8N2O3	[M-H]-	10.4	12.4	15	0.2	131.046	131.045	-9.3	S14396	11.44	11.37	11.52	0.15	3216457	2717887	2572105	1880059	2544391	2553520	43639	7392	45483	8205	44406	7285	0.16061	6.22627	2835483	2325990	0.28575	1.21904	88205	2.58074e+06	20	6
	135	Ureidosuccinic acid	136 Ureidosuccinic acid	C5H8N2O5	[M-H]-	12.8	14.8	15	0.2	175.036	175.035	-5.4	S14401	13.65	13.6	13.7	0.1	8556811	8575318	6978112	378991	2996872	2136240	0	0	0	0	0	0	0.00268114	372.975	8036747	1.83737e+06	2.12897	4.37405	10000	4.93706e+06	8054	6
	136	Uric acid	137 Uric acid	C5H4N4O3	[M+H]+	8.8	10.8	15	0.2	169.036	169.037	10	S14397	10.72	10.72	10.72	0	10000	10000	10000	10000	10000	10000	0	0	0	0	0	0	NA	NA	10000	10000	0	1	10000	10000	0	0
	137	Uridine	138 Uridine	C9H12N2O6	[M-H]-	5.5	7.5	15	0.2	243.062	243.062	-1.1	S14399	6.67	6.57	6.9	0.32	180538	335888	178360	253254	226759	273326	4818	3081	5302	2642	5153	3790	0.73543	1.35975	231595	251113	-0.116731	0.922275	22393	241354	0	6
	138	Uridine 5'-diphosphate	139 Uridine 5'-diphosphate	C9H14N2O12P2	[M+H]+	12.4	14.4	15	0.2	405.01	405.009	-1.7	S14396	13.25	13.21	13.31	0.11	616025	262019	331534	115255	321636	222948	2954	0	0	0	0	0	0.212349	4.70922	403193	219946	0.874318	1.83314	11477	311570	3	6
	139	Uridine 5'-monophosphate	140 Uridine 5'-monophosphate	C9H13N2O9P	[M-H]-	11.2	13.2	15	0.2	323.029	323.028	-0.6	S14396	12.07	11.97	12.15	0.18	1983408	1236890	1327826	998824	980668	1724093	54774	15654	54571	23441	40574	18448	0.453575	2.20471	1.51604e+06	1.23453e+06	0.296349	1.22803	113731	1.37528e+06	4	6
	140	Uridine diphosphate glucose	141 Uridine diphosphate glucose	C15H24N2O17P2	[M-H]-	12.4	14.4	15	0.2	565.048	565.048	1	S14396	13.26	13.2	13.29	0.09	3096543	971113	1609506	295690	1457725	918740	0	0	0	0	0	0	0.233067	4.2906	1.89239e+06	890718	1.08717	2.12456	10000	1.39155e+06	13	6
	141	Uridine diphosphate-N-acetylglucosamine	142 Uridine diphosphate-N-acetylglucosamine	C17H27N3O17P2	[M+H]+	11.2	13.2	15	0.2	608.089	608.088	-1.2	S14396	12.16	12.07	12.17	0.09	855892	496686	558869	354194	567157	561948	0	0	0	0	0	0	0.337725	2.96099	637149	494433	0.365856	1.28865	10000	565791	2	6
	142	Uridine triphosphate	143 Uridine triphosphate	C9H15N2O15P3	[M-H]-	15	18	15	0.2	482.961	482.962	0.7	S14396	15.02	15.01	15.26	0.25	30259	10000	10000	10000	10293	10000	0	0	0	0	0	0	0.3802	2.63019	16753	10097.7	0.730398	1.6591	10000	13425.3	0	2
	143	Valerylcarnitine	144 Valerylcarnitine	C12H23NO4	[M+H]+	3.6	5.7	15	0.2	246.17	246.169	-2	S14396	4.87	4.64	5.05	0.41	2068242	1188625	1152082	815362	1346785	1214716	8520	8412	9578	6473	7779	8104	0.368115	2.71654	1.46965e+06	1125621	0.384751	1.30563	34433	1.29764e+06	5	6
	144	Xanthine	145 Xanthine	C5H4N4O2	[M-H]-	7.5	9.4	15	0.2	151.026	151.025	-6.3	S14397	8.59	8.54	8.66	0.11	738766	691448	517361	430427	627781	526903	10513	9638	10300	9473	10101	10725	0.242552	4.12282	649192	528370	0.297095	1.22867	40375	588781	3	6
	145	Xanthosine	146 Xanthosine	C10H12N4O6	[M-H]-	6.7	8.7	15	0.2	283.068	283.068	0	S14413	7.73	7.53	7.73	0.21	10897.5	10897.5	10897.5	10897.5	10897.5	10897.5	0	0	1795	0	0	0	NA	NA	10897.5	10897.5	0	1	10897.5	10897.5	0	0
	146	Xanthylic acid	147 Xanthylic acid	C10H13N4O9P	[M-H]-	11	13	15	0.2	363.035	363.035	0.4	S14415	11.16	11.16	11.16	0	10000	10000	10000	10000	10000	10000	0	0	0	0	0	0	NA	NA	10000	10000	0	1	10000	10000	0	0
[truncated: 39 more columns]
