# Supplementary material for: Orai3 and Orai1 mediate CRAC channel function and metabolic reprogramming in B cells
Source: eLife. 2023 Feb 21;12:e84708. doi: 10.7554/eLife.84708 (PMC9998091; doi:10.7554/eLife.84708)
Supplement: Figure 10—source data 1. [file elife-84708-fig10-data1.xlsx]

## Sheet: Sheet1
Figure 10C
	Orai1/3F/F	Orai1/3F/F; Mb1-Cre
	43.38	43.61
	50.38	50.58
	49.51	46.22
	47.65	47.33
	45.41	52.46
	24.4	30.9
	35	22.8
	37.3	44.5
	38.2	24.9
	31.3	27.6
Figure 10E
	PB%				GC-B%
		Orai1/3F/F	Orai1/3F/F; Mb1Cre/+			Orai1/3F/F	Orai1/3F/F; Mb1Cre/+
		0.7	0.8			25.7	17.8
		1.3	0.4			20.9	15.9
		0.4	0.7			26.8	23.5
		0.8	0.3			18.1	17.1
		0.5	0.5			20.6	19
		0.75	0.84			32.88	27.27
		0.8	0.76			30.59	34.78
		1.25	1.21			44.18	23.95
		1.17	0.78			34.08	29.23
		1.09	0.69			20.61	21.94
	PB Cellularity				GC-B Cellularity
		Orai1/3F/F	Orai1/3F/F; Mb1Cre/+			Orai1/3F/F	Orai1/3F/F; Mb1Cre/+
		16500	56300			364000	672000
		41300	12300			373000	245000
		7660	19200			208000	347000
		30800	2520			350000	71200
		17700	15800			303000	283000
		23500	18300			548000	330000
		12600	8620			264000	183000
		23400	40000			417000	543000
		39200	14900			568000	275000
		72100	27800			736000	473000
Figure 10F
	BM PB%
		Orai1/3F/F	Orai1/3F/F; Mb1Cre/+
		0.24	0.42
		0.2	0.4
		0.34	0.31
		0.4	0.29
		0.68	0.73
		0.1195	0.1344
		0.1589	0.3072
		0.2223	0.1458
		0.2296	0.0732
		0.4251	0.0988
	BM PB# (10^4)
		Orai1/3F/F	Orai1/3F/F; Mb1Cre/+
		3.56	6.34
		2.35	5.39
		4.13	3.89
		4.49	2.62
		5.55	3.8
		1.32	2.03
		2.17	1.49
		2.7	1.64
		2.19	0.4
		3.74	1.12
Figure 10G
	IgG1+ GC-B cells %
		Orai1/3F/F	Orai1/3F/F; Mb1Cre/+
		17.07	16.95
		11.58	14.31
		10.91	14.95
		14.18	20.15
		9.72	10.06
	IgG1(-)IgM(-) GC-B cells %
		Orai1/3F/F	Orai1/3F/F; Mb1Cre/+
		64.46	67.9
		65.77	77.31
		77.89	65.84
		64.43	68.32
		72.63	79.49
Figure 10H
	ELISA to test antibody titers
		Day9, anti-X31-IgM
			Control- Orai1/3F/F						Orai1/3F/F; Mb1-Cre
		60	2.3666	2.0715	2.1689	1.8241	2.6186		2.0279	2.1886	2.4812	1.8573	2.4552
		180	1.5794	1.4106	1.3323	1.0812	1.6488		1.2393	1.2122	1.4618	1.0157	1.4474
		540	0.8472	0.8265	0.7199	0.6286	0.8984		0.648	0.7345	0.795	0.5385	0.7727
		1620	0.4748	0.4031	0.3578	0.3487	0.5292		0.3065	0.318	0.3673	0.2636	0.3876
		4860	0.2055	0.2176	0.1829	0.22	0.2405		0.2069	0.1652	0.2041	0.1728	0.2056
		14580	0.1939	0.2034	0.1733	0.1987	0.1738		0.1868	0.158	0.1897	0.1597	0.2048
		43740	0.196	0.1904	0.1954	0.1871	0.177		0.1775	0.1742	0.1771	0.174	0.1825
		Day9, anti-X31-IgG
			Control- Orai1/3F/F						Orai1/3F/F; Mb1-Cre
		20	1.2494	0.9962	1.2642	1.247	1.5326		1.2484	1.3184	1.3919	1.2173	1.9671
		60	0.9621	0.9404	1.3579	1.3141	1.4308		1.3271	1.2482	1.2787	1.0821	1.5131
		180	0.6452	0.8537	0.9864	0.9476	0.8222		0.9323	0.651	0.79	0.6369	1.0292
		540	0.3725	0.6558	0.7351	0.6507	0.5062		0.5019	0.3684	0.445	0.3226	0.6386
		1620	0.2793	0.4375	0.5072	0.4421	0.3574		0.3444	0.2875	0.2898	0.2176	0.4367
		4860	0.2134	0.2826	0.3607	0.3777	0.3187		0.2934	0.239	0.2581	0.2106	0.3467
		14580	0.218	0.2329	0.2175	0.2375	0.241		0.2448	0.2132	0.2404	0.2233	0.2854
		43740	0.2078	0.2015	0.2705	0.2154	0.2334		0.1862	0.234	0.2171	0.1899	0.2416
		Day15, anti-X31-IgM
			Control- Orai1/3F/F						Orai1/3F/F; Mb1-Cre
		60	1.8597	2.0051	1.9852	1.6319	2.5391		1.9617	1.9743	2.2709	1.2987	2.1963
		180	1.0792	1.436	1.2892	1.0909	1.7185		1.224	1.0997	1.5312	0.7028	1.4879
		540	0.5138	0.8173	0.7719	0.6623	0.9634		0.6551	0.5366	0.7912	0.3506	0.8035
		1620	0.2287	0.3156	0.3442	0.3615	0.5207		0.3232	0.2429	0.322	0.2056	0.3566
		4860	0.1705	0.2065	0.1833	0.2335	0.2356		0.2131	0.1733	0.2224	0.1771	0.2277
		14580	0.1773	0.1977	0.1617	0.1982	0.1545		0.1726	0.1538	0.1949	0.1571	0.2082
		43740	0.2261	0.2184	0.2349	0.2151	0.199		0.21	0.2375	0.2288	0.2078	0.2207
		Day15, anti-X31-IgG
			Control- Orai1/3F/F						Orai1/3F/F; Mb1-Cre
		20	1.2375	1.3743	1.7209	1.5588	1.9054		1.5999	1.6167	1.8637	1.4644	2.0714
		60	0.8447	1.3831	1.4762	1.367	1.4146		1.3223	1.26	1.4338	1.1386	1.665
		180	0.5923	1.2021	0.8211	0.7695	0.6208		0.6876	0.4837	0.7176	0.5122	0.9851
		540	0.3927	0.8152	0.5097	0.4932	0.3945		0.4269	0.2976	0.4383	0.2967	0.5328
		1620	0.2913	0.4802	0.3877	0.3604	0.2751		0.2753	0.2111	0.2842	0.2346	0.3421
		4860	0.2514	0.3233	0.2979	0.3309	0.2418		0.2646	0.2209	0.2509	0.218	0.2842
		14580	0.22	0.2575	0.2521	0.26	0.2441		0.2461	0.2618	0.265	0.2788	0.2821
		43740	0.2183	0.2052	0.2164	0.2108	0.2196		0.203	0.2054	0.2022	0.2347	0.2134
