# Supplementary material for: Orai3 and Orai1 mediate CRAC channel function and metabolic reprogramming in B cells
Source: eLife. 2023 Feb 21;12:e84708. doi: 10.7554/eLife.84708 (PMC9998091; doi:10.7554/eLife.84708)
Supplement: Source data 3. [file elife-84708-data3.xlsx]

## Sheet: WT_IgM_vs_KO_IgM_up
gene	logFC	logCPM	LR	PValue	FDR
Orai1	3.77057	5.01404	105.718	8.50185e-25	1.01121e-20
Auts2	3.47136	0.0912069	55.9834	7.30852e-14	4.34637e-10
Orai3	3.70089	4.89913	42.0451	8.91924e-11	2.65214e-07
Wnt1	2.75098	0.280558	41.5247	1.16393e-10	2.76875e-07
Wnt10b	1.30656	3.90128	38.4833	5.52241e-10	9.38337e-07
Rcan1	1.02938	5.25277	32.4711	1.20976e-08	1.59877e-05
Stard13	3.17291	-1.08947	29.9779	4.36995e-08	4.7251e-05
Spp1	2.43139	2.25888	26.0081	3.39984e-07	0.00031106
Cd79a	0.742353	10.4293	23.6527	1.15387e-06	0.000857755
Rgs9bp	1.47908	1.64773	23.406	1.31169e-06	0.000917722
Cntnap1	2.30452	2.3103	22.938	1.67316e-06	0.0010474
Serpinc1	2.07451	1.01914	20.3751	6.36528e-06	0.00329168
Ccno	2.62598	-0.940754	20.1296	7.23699e-06	0.00344307
Lrrc16b	0.853442	2.94118	19.5495	9.80263e-06	0.00431824
Otud1	0.565589	5.89904	19.4194	1.04933e-05	0.00445742
Chga	3.46469	-0.465204	18.9213	1.36224e-05	0.00538458
Gramd1b	0.97673	4.97095	18.8362	1.42437e-05	0.00538458
Inpp4a	0.538522	5.70012	18.7825	1.46502e-05	0.00538458
Slc16a11	2.30916	2.44914	18.7452	1.49396e-05	0.00538458
Zwilch	0.943017	4.20654	18.5727	1.63542e-05	0.00572109
4930524J08Rik	1.83738	-0.177388	18.4505	1.74378e-05	0.00577206
Zap70	1.9713	1.08658	18.0186	2.18758e-05	0.00703217
Rab11fip4	1.51047	4.074	17.5738	2.76364e-05	0.00799486
Kcnn4	1.37407	5.53279	17.5333	2.82314e-05	0.00799486
Slc7a7	1.21233	3.78457	17.3469	3.11413e-05	0.00861383
Spry2	1.22139	3.68624	17.2195	3.33006e-05	0.00880172
Myh10	1.53641	1.09613	17.0234	3.69221e-05	0.00928406
Pdcd1	1.5736	4.75977	16.9564	3.82478e-05	0.00928406
Havcr1	0.751013	5.22243	16.6893	4.40286e-05	0.0102682
Rad54b	1.04752	3.23004	16.2749	5.47847e-05	0.0124743
Ctla4	1.751	1.04355	16.2048	5.68512e-05	0.0124743
Hist1h3c	1.90585	1.13329	16.2012	5.69589e-05	0.0124743
Itga9	2.85143	0.852446	16.1772	5.76835e-05	0.0124743
Synpo	1.28902	2.41454	15.9757	6.41622e-05	0.0133885
Sh3bgrl2	1.73874	1.56768	15.8009	7.03701e-05	0.0141861
Wdhd1	0.499618	6.09612	15.7039	7.40723e-05	0.0144429
Cd70	2.58003	-0.623475	15.3032	9.15614e-05	0.0166434
Hist1h2ai	1.65822	-0.194644	15.3022	9.16116e-05	0.0166434
Bmp1	1.47374	1.15833	15.2943	9.19957e-05	0.0166434
Eno3	0.762848	6.8617	15.2869	9.23543e-05	0.0166434
Pkp4	0.954516	3.98615	15.0163	0.000106585	0.0189212
Nrgn	1.78319	5.41023	14.9732	0.000109048	0.0190204
Gpr176	1.42448	0.602526	14.951	0.000110342	0.0190204
Bmp6	1.58518	0.0404152	14.383	0.000149144	0.0249792
Slc9a5	0.912481	3.32064	14.3504	0.00015175	0.0249792
Slc30a3	1.44036	-0.448715	14.3311	0.000153311	0.0249792
Eme1	1.21765	3.09001	14.0147	0.000181383	0.0285781
Dscc1	0.994133	3.36612	13.9263	0.000190119	0.0289705
Ksr2	1.8146	2.38675	13.7977	0.00020359	0.0302688
Ccl22	2.01842	5.84998	13.7481	0.000209034	0.0306945
Syngr4	1.65444	-0.822418	13.6484	0.000220427	0.0315875
P2ry1	4.02013	-0.788206	13.5129	0.000236924	0.0324458
Tacc2	0.629281	4.73638	13.5063	0.00023776	0.0324458
Cst6	3.03118	0.195022	13.5039	0.000238066	0.0324458
Noxa1	2.99034	0.434734	13.4883	0.000240056	0.0324458
Pard6g	1.0284	3.38933	13.456	0.000244226	0.0326385
Dlgap5	0.964488	4.34831	13.341	0.00025967	0.0342198
Ahnak	0.878109	5.44334	13.3256	0.000261813	0.0342198
Brca1	0.81675	4.8313	12.9421	0.000321273	0.0406513
Phyhip	1.37872	2.43878	12.8882	0.000330669	0.0408869
Rasgef1a	1.87876	1.13429	12.8725	0.000333448	0.0408869
3425401B19Rik	1.73078	0.727743	12.8084	0.000345076	0.0418809
Hist1h2ag	2.15338	-0.564281	12.7185	0.000362052	0.0422181
Cfap45	1.0506	1.98695	12.5506	0.000396081	0.0452979
Xcl1	2.18807	-0.854984	12.3912	0.000431351	0.0472128
Prx	1.30211	0.0372234	12.3855	0.000432671	0.0472128
Rtkn2	2.64571	-0.0950182	12.3329	0.000445053	0.0477453
Pacsin1	0.655163	6.11536	12.3307	0.00044558	0.0477453
Phf19	0.780211	4.48412	12.2798	0.000457887	0.048626
Cd27	0.883608	3.06885	12.2384	0.000468169	0.0490155
Dmwd	2.06129	0.0282517	12.2319	0.000469797	0.0490155
Cd3g	2.28174	-0.414172	12.2006	0.000477738	0.0491071
Wnt16	2.1528	-1.05579	12.189	0.000480713	0.0491071
Tnfsf8	1.6302	-0.703212	12.1608	0.000488045	0.0491407
Pdgfa	2.63724	1.08573	12.0895	0.000507064	0.0491407
Igfbp7	2.7567	-0.468311	12.07	0.000512399	0.049149
Fgf13	1.1349	1.88494	12.0511	0.000517615	0.0492521
Tnfrsf4	0.944146	2.66639	12.0198	0.000526388	0.0492981
Wdr90	0.542438	6.10735	12.0028	0.000531198	0.0493599
Wdr62	0.817717	4.27248	11.8931	0.000563414	0.0504712
Actn1	1.56313	5.85791	11.8228	0.000585111	0.0511714
Itgae	1.37735	-0.215681	11.7823	0.000597972	0.0517722
Ccl3	1.13962	2.90035	11.6567	0.000639729	0.0541098
Zdhhc2	1.97991	-0.707774	11.621	0.000652124	0.0546081
Ifng	1.66479	0.0430604	11.6084	0.000656545	0.0546081
Pole	0.604995	6.02753	11.581	0.000666299	0.0549769
Pola1	0.503979	5.50121	11.5192	0.000688817	0.0553567
Spn	1.13397	6.0053	11.4972	0.000697009	0.0556391
Tmem98	2.57708	-0.0649268	11.4513	0.000714459	0.0564882
Nkg7	2.11601	0.23641	11.4346	0.000720907	0.0564882
Efcab11	1.28844	0.65805	11.4267	0.000723968	0.0564882
G0s2	1.75479	-0.348951	11.4193	0.00072684	0.0564882
Ajuba	1.06548	1.86856	11.4077	0.000731393	0.0564882
Mtbp	0.439444	4.89274	11.3684	0.000747022	0.0567743
Fbxo5	0.775094	4.64009	11.3588	0.000750932	0.0567743
Tshb	1.53342	-0.430612	11.3539	0.000752888	0.0567743
Casp7	0.625837	4.27607	11.3507	0.00075419	0.0567743
Arhgap33	1.32128	4.22686	11.3277	0.000763597	0.0567877
BC055324	0.443583	4.24456	11.2897	0.000779389	0.057578
Recql4	0.731568	4.26008	11.2667	0.000789118	0.0579369
Zkscan16	2.48279	-0.801413	11.2303	0.000804728	0.0580257
Mis18bp1	1.12799	3.32975	11.195	0.000820181	0.0585234
Snx11	0.38434	6.91739	11.1794	0.000827086	0.0585234
Tiam2	0.893383	1.36222	11.1126	0.000857413	0.0599887
Parp8	0.488826	5.60536	11.0273	0.000897775	0.0614589
Tenm4	0.963367	1.23843	11.0241	0.000899339	0.0614589
Skp2	0.606061	3.52668	11.0234	0.000899665	0.0614589
Endou	0.971994	4.71364	11.0067	0.000907831	0.0614589
Ncapd3	0.439658	5.72234	11.0034	0.00090943	0.0614589
Ssx2ip	0.655817	3.25799	10.9241	0.000949216	0.0637852
Lphn1	1.15854	4.58076	10.8817	0.000971196	0.0647397
Ncs1	0.950159	1.72315	10.8515	0.000987159	0.0647397
Il4i1	1.81392	-0.470785	10.8508	0.000987508	0.0647397
Slc30a2	1.43953	-0.307872	10.8491	0.000988458	0.0647397
Matn2	2.33705	-0.755173	10.8007	0.00101462	0.0656625
Rgs16	1.24627	2.10403	10.783	0.00102437	0.0657322
Chka	0.371392	6.20948	10.7378	0.00104967	0.0660568
Skida1	1.12796	0.957705	10.6331	0.0011108	0.0682001
Prim2	0.557686	4.67323	10.6194	0.00111909	0.0682001
Suv39h1	0.474758	5.62467	10.6153	0.00112156	0.0682001
Sema4c	1.13232	2.53948	10.6129	0.001123	0.0682001
Timd2	1.20844	3.35236	10.6034	0.00112878	0.0682001
Foxm1	1.27931	5.01553	10.5988	0.00113162	0.0682001
Cdkn2c	0.981446	4.30537	10.5859	0.00113951	0.0682001
Eid2	1.91512	-0.646521	10.5738	0.00114702	0.0682001
Asap1	0.293557	6.47181	10.5588	0.00115634	0.0682001
Prob1	0.608498	3.015	10.5558	0.00115827	0.0682001
4930427A07Rik	0.777711	4.50379	10.5166	0.00118306	0.0682834
Atad2	0.471596	6.76431	10.4525	0.00122482	0.0690428
Tbc1d31	0.629355	3.77638	10.3384	0.00130294	0.0727565
Arc	1.17436	2.79057	10.2527	0.00136485	0.075505
Dnajb13	1.11356	1.81372	10.1993	0.00140495	0.0760307
Hist1h2bj	1.46652	0.992873	10.1961	0.00140739	0.0760307
Cenpn	1.06012	3.77322	10.1875	0.00141395	0.0760307
Ndc1	0.448725	4.97714	10.184	0.00141663	0.0760307
Dtymk	0.435163	6.45918	10.1836	0.00141697	0.0760307
Elane	4.5379	1.43176	10.1725	0.0014255	0.0760307
Slc39a8	1.09371	0.663523	10.1253	0.00146251	0.0768796
Ndrg1	0.57957	4.89263	10.1193	0.00146727	0.0768796
Enkd1	0.936063	2.94827	10.0975	0.00148472	0.0769335
Ticrr	0.958876	4.35727	10.0881	0.0014923	0.0769335
Ncapd2	0.832644	7.07523	10.0734	0.00150427	0.0769335
Spc25	1.0991	3.36914	10.062	0.00151357	0.0769335
Abhd6	0.55907	5.40741	10.0385	0.00153306	0.0775923
Matk	1.02114	4.39182	9.98834	0.00157535	0.0783774
Pcdhgc4	1.90693	-1.22727	9.98442	0.00157871	0.0783774
Dusp14	1.15107	0.80114	9.98114	0.00158152	0.0783774
AC133103.1	1.49948	-0.363051	9.9675	0.00159328	0.0784349
Fanca	0.645927	5.15812	9.95268	0.00160615	0.0784349
Bend4	1.37274	0.846209	9.94842	0.00160987	0.0784349
Otx1	1.01037	0.848427	9.94594	0.00161204	0.0784349
Rad51	0.772343	5.17638	9.94044	0.00161687	0.0784349
Ulbp1	0.629031	4.61483	9.93433	0.00162224	0.0784349
Cpt1b	1.07505	0.669505	9.82819	0.00171857	0.0827559
Cdc20	1.32507	4.30646	9.80511	0.00174027	0.0834629
Chtf18	0.699778	4.89714	9.76166	0.00178189	0.0844374
Fancd2	0.800308	4.34395	9.74934	0.00179387	0.0844888
Prkca	0.404129	7.11283	9.74595	0.00179718	0.0844888
Zranb3	0.667263	4.03323	9.7119	0.00183079	0.08526
Zfp362	0.559344	7.0465	9.68458	0.00185821	0.0853341
Ncaph	1.1445	5.09456	9.65144	0.00189204	0.0861435
Spef2	0.953445	1.02168	9.61951	0.00192521	0.0863788
Rbm44	1.23891	1.55932	9.61324	0.00193179	0.0863788
Ddx11	0.487653	4.86105	9.60303	0.00194257	0.0865352
Dnah8	1.00059	3.68508	9.5346	0.00201634	0.0891539
Rrm1	0.543411	7.31304	9.52682	0.00202491	0.0892009
Chn2	1.86674	0.491772	9.51584	0.00203706	0.0894053
Lama5	2.26675	0.455476	9.48507	0.00207151	0.090583
Kif20a	1.35776	4.02117	9.47784	0.00207968	0.0906071
Ppm1e	0.628274	4.80034	9.45119	0.00211012	0.091118
Srgap2	0.459949	5.28234	9.44748	0.00211439	0.091118
Kif23	1.36679	4.3349	9.42409	0.00214154	0.0919547
Cd160	1.38592	-0.192188	9.41104	0.00215683	0.0922783
Pkmyt1	0.722856	6.02331	9.37536	0.00219921	0.0934194
Fignl1	0.730878	5.25385	9.34333	0.00223798	0.0943319
Cntd1	1.47193	-0.160799	9.33727	0.0022454	0.0943319
S100a9	4.73644	2.27561	9.31031	0.00227868	0.0950543
Arhgef39	1.31061	0.943926	9.30471	0.00228565	0.0950543
Tacc3	0.873585	5.34993	9.26702	0.00233317	0.0958725
Whsc1	0.474326	6.83606	9.25437	0.00234934	0.0958725
Adssl1	1.07236	3.97481	9.25304	0.00235105	0.0958725
Paxip1	0.281612	6.49459	9.23922	0.00236886	0.0959764
Mms22l	0.391762	5.02062	9.2365	0.00237238	0.0959764
Syne2	0.679023	5.20314	9.22673	0.00238508	0.0961631
Dnmt1	0.355873	8.17816	9.21985	0.00239405	0.0961786
Aurka	0.934972	3.5263	9.20128	0.00241846	0.0961786
Mcm7	0.451351	7.98375	9.19691	0.00242424	0.0961786
Wdr78	0.665647	2.11489	9.19566	0.00242589	0.0961786
Ybx2	2.23135	-0.27014	9.16681	0.00246444	0.0973823
Folr4	1.76571	2.04228	9.13956	0.00250142	0.098191
Klhl32	1.30361	-0.433691	9.12989	0.00251467	0.0983864
Exo1	0.685411	4.39853	9.08523	0.00257682	0.0994382
Mcm2	0.350253	7.58012	9.08396	0.00257861	0.0994382
Plekhg5	1.19602	2.21362	9.08109	0.00258267	0.0994382
Dhfr	0.644271	4.89691	9.07502	0.00259125	0.0994382
Pip5k1b	0.438834	4.59986	9.07444	0.00259207	0.0994382
Smc4	0.448091	7.46071	9.05459	0.00262036	0.0995738
Chaf1a	0.695469	5.52744	9.03154	0.00265361	0.099988
Zmynd10	1.88432	-0.670864	9.03071	0.00265482	0.099988
2610020H08Rik	0.638683	3.08111	9.02956	0.00265648	0.099988
Lrfn4	1.40803	0.423109	9.01305	0.00268058	0.10026
Knstrn	0.785322	4.13113	9.00494	0.00269251	0.100391
Csrp2	0.833242	4.79073	8.97648	0.00273477	0.101648
Camk2a	1.17326	1.10314	8.94595	0.00278086	0.102776
Mpo	4.33283	3.79426	8.93927	0.00279105	0.102776
Bcl6b	0.650459	4.74615	8.93037	0.00280468	0.102959
Cdc42bpa	1.87715	0.344726	8.9157	0.0028273	0.103471
Cyp1a1	3.24665	0.677879	8.86158	0.00291236	0.106256
Ston1	1.35936	-0.598776	8.84926	0.00293207	0.106283
Kifc5b	0.759095	3.44815	8.82555	0.00297041	0.106283
Blm	0.495711	4.81539	8.82017	0.00297918	0.106283
Cul7	0.423211	4.48471	8.81814	0.00298251	0.106283
Cbx2	0.698634	3.06266	8.81793	0.00298284	0.106283
Igll1	5.67842	-0.241715	8.78963	0.00302947	0.106921
Pcyt1b	1.35383	0.164978	8.76893	0.00306405	0.107148
Aurkb	1.10064	5.14015	8.76069	0.00307792	0.107148
Hmgb2	0.959307	7.67644	8.75892	0.00308092	0.107148
Cchcr1	0.746849	4.41847	8.74385	0.00310648	0.107722
Pold1	0.30791	8.02373	8.73774	0.0031169	0.107769
Etv5	0.900712	3.20482	8.73124	0.00312804	0.10784
Kif18a	0.682514	3.15393	8.72378	0.00314087	0.10797
Arhgap11a	0.594562	5.74527	8.71057	0.00316371	0.108223
Phldb1	1.02842	2.50373	8.65926	0.00325404	0.110582
Snai3	0.668997	2.45265	8.63978	0.00328901	0.111135
Mad2l1	0.640917	5.31417	8.60285	0.00335637	0.11277
Gmnn	0.664203	4.84491	8.55403	0.00344758	0.115184
Rpl36al	1.08688	0.576759	8.52699	0.00349919	0.116581
Sh3bgr	1.87055	0.241937	8.5086	0.00353472	0.116893
Ankrd13b	0.680901	2.83198	8.5069	0.00353803	0.116893
Cep83	0.362967	5.60303	8.47807	0.00359453	0.11843
Acy3	2.41793	-1.05724	8.45464	0.00364113	0.119326
Gins1	0.572581	3.77444	8.45432	0.00364178	0.119326
Tmem255a	2.2884	-0.0292751	8.44373	0.00366304	0.119425
Ccl4	0.752673	4.04753	8.43503	0.00368061	0.119425
Smoc1	1.36315	0.602427	8.43288	0.00368497	0.119425
Gtf2e1	0.344484	5.93801	8.40747	0.00373682	0.120776
Troap	1.53973	2.54891	8.3886	0.00377582	0.121645
Ltf	4.77988	1.21952	8.38459	0.00378416	0.121645
Rag1	4.42211	4.32092	8.37674	0.00380053	0.121842
Acvrl1	0.984929	1.11138	8.36533	0.00382447	0.12228
Hsd11b1	0.808317	3.04944	8.34581	0.00386579	0.123262
Lig1	0.523116	7.18699	8.32081	0.00391935	0.124311
Kif22	1.28711	4.62261	8.31253	0.00393724	0.124327
Gpr12	4.26796	-0.599936	8.31091	0.00394077	0.124327
Rpa3	0.48141	4.77992	8.27973	0.004009	0.124996
Cntrob	0.367051	5.57074	8.27824	0.00401229	0.124996
Diap3	0.903931	3.8554	8.25985	0.00405315	0.125606
Tagln	1.3953	-0.144385	8.22869	0.00412333	0.1273
Cenph	0.888663	3.71727	8.22517	0.00413133	0.1273
Tonsl	0.503212	5.73006	8.21837	0.00414683	0.127328
Tnfsf14	1.10072	3.21621	8.20753	0.00417169	0.127328
Stmn1	1.1648	6.59179	8.20019	0.0041886	0.127328
Mns1	0.971242	2.6546	8.1972	0.00419551	0.127328
Phf21b	1.00948	0.917449	8.19514	0.00420026	0.127328
Nasp	0.363304	6.94151	8.18365	0.00422695	0.127328
Aspm	1.72324	3.54426	8.17564	0.00424567	0.127328
Anln	1.6491	2.76457	8.16232	0.00427697	0.127328
Cdc6	0.8231	4.83067	8.15832	0.00428642	0.127328
Csf1	1.14324	5.01306	8.14952	0.00430726	0.127328
Inpp5b	0.273599	5.91733	8.13778	0.00433524	0.127328
Cdk2	0.365401	6.98366	8.13597	0.00433957	0.127328
Cp	1.24043	-0.109119	8.13344	0.00434561	0.127328
Il5ra	0.728866	4.9589	8.13168	0.00434985	0.127328
Amigo1	0.800437	2.75719	8.12967	0.00435467	0.127328
Ccne1	0.682934	4.97199	8.12016	0.00437758	0.127328
Ska2	0.71756	3.51194	8.11529	0.00438935	0.127328
Ercc6l	0.473097	4.46101	8.11509	0.00438984	0.127328
Mcm6	0.335436	8.11864	8.10533	0.00441353	0.127328
Plau	1.40519	1.2541	8.10497	0.0044144	0.127328
Slc12a3	1.66381	1.52562	8.10398	0.00441683	0.127328
Trib1	0.45536	5.10985	8.08163	0.00447161	0.128096
Scarb1	0.637198	4.85477	8.07842	0.00447955	0.128096
Tk1	0.758072	6.13586	8.07814	0.00448023	0.128096
Cenpv	1.01759	2.79357	8.04849	0.00455416	0.128969
Tnfsf9	0.822984	2.19021	8.01864	0.00462982	0.130491
Cx3cl1	1.39015	0.707182	8.00015	0.00467734	0.130888
Fam122a	0.34461	5.00114	7.99181	0.00469894	0.130888
Gfra1	2.78277	0.755785	7.9669	0.00476405	0.13199
Gen1	0.762133	3.52191	7.95414	0.00479776	0.13199
Ckap2	1.37318	2.96494	7.95203	0.00480335	0.13199
Tspan33	1.78445	2.65201	7.94914	0.00481102	0.13199
Itga1	2.7629	-0.0489155	7.9472	0.00481618	0.13199
Acvr1	1.46893	0.118599	7.9353	0.00484796	0.132504
Fam92a	0.953359	2.53006	7.93185	0.00485722	0.132504
Spock2	1.25948	0.880161	7.9191	0.00489156	0.132832
Tns1	1.57979	2.5795	7.90636	0.00492614	0.133466
Cacna2d1	4.02546	-0.93214	7.88993	0.00497107	0.134053
Topbp1	0.274071	7.65885	7.88639	0.00498081	0.134053
Kif4	1.44931	3.68841	7.88296	0.00499027	0.134053
Dpysl2	0.510851	4.8243	7.87574	0.00501023	0.134215
Phf10	0.282748	5.69266	7.85926	0.0050561	0.134936
Plekhh1	0.802279	1.86535	7.85389	0.00507115	0.134936
Nrp1	1.1534	2.81192	7.84576	0.005094	0.135241
Pola2	0.412183	6.31005	7.83197	0.00513302	0.135661
Klrb1f	1.24044	0.424396	7.83188	0.00513326	0.135661
Mki67	1.79593	6.76794	7.82426	0.00515496	0.135661
Lrr1	1.32337	1.92825	7.82409	0.00515544	0.135661
Nrxn2	1.5977	-0.284352	7.81026	0.00519504	0.136401
Cep57	0.231721	6.75837	7.80189	0.00521916	0.136733
Ipo9	0.235861	6.89691	7.7904	0.00525246	0.137301
Dmxl2	1.35247	1.90276	7.78646	0.00526393	0.137301
Arhgap23	0.957359	2.58991	7.77851	0.00528713	0.137604
Bub1	1.48199	3.94691	7.77022	0.00531147	0.137936
Ccnf	1.11194	4.48757	7.76214	0.00533528	0.138154
Car15	1.14003	0.628226	7.75942	0.0053433	0.138154
Bhlhe41	0.960021	4.97537	7.71211	0.00548516	0.140605
Tyro3	1.30013	-0.238503	7.70418	0.00550931	0.14078
Mmp11	0.742735	2.54693	7.69904	0.00552503	0.14078
Incenp	0.930057	5.92492	7.69823	0.0055275	0.14078
Mcm10	0.944238	4.99255	7.68413	0.00557087	0.141581
Apba1	1.39198	1.62577	7.67097	0.00561164	0.14201
H2afz	0.478599	7.58865	7.66568	0.00562811	0.142125
Gucy1a3	4.96683	-1.33925	7.64883	0.00568092	0.142903
Sema3f	1.31391	-0.876573	7.64818	0.00568296	0.142903
Cdca8	1.1614	4.65314	7.63691	0.00571858	0.142972
Gtf2ird1	1.41386	1.07952	7.63677	0.00571902	0.142972
Cd6	1.25227	-0.0697033	7.63497	0.00572474	0.142972
Cenpu	0.690971	2.63686	7.62662	0.00575129	0.142972
Lzts1	2.14383	-0.742533	7.62165	0.00576716	0.142972
Rsph9	1.68143	-0.46436	7.61773	0.00577973	0.142972
Spdl1	0.388721	3.80575	7.61706	0.00578186	0.142972
Pdhx	0.349047	4.31182	7.58766	0.00587692	0.144421
Ncapg2	0.791909	5.33924	7.58681	0.00587969	0.144421
Pstpip2	1.28934	2.48189	7.57252	0.00592649	0.144743
Lag3	0.917302	4.1279	7.56089	0.00596485	0.145381
Inppl1	0.578988	5.39078	7.55668	0.00597881	0.145423
Ccdc120	1.29795	-0.698055	7.55275	0.00599185	0.145443
Kdelc2	1.34502	1.18643	7.54668	0.00601207	0.145637
Ppap2a	0.901248	2.12927	7.54263	0.0060256	0.145668
Cd99	0.615043	3.80384	7.53752	0.00604272	0.145785
Tspan2	0.436418	5.66875	7.53147	0.00606303	0.145905
Espl1	1.50779	4.8126	7.52874	0.00607223	0.145905
Tbc1d24	0.808385	2.38301	7.51151	0.00613061	0.147011
Kifc1	1.33028	3.91511	7.49016	0.00620372	0.14787
Ppapdc3	1.41407	-0.688253	7.46618	0.00628689	0.148952
Stk32c	1.35497	-0.676716	7.45933	0.00631083	0.148952
Neil3	2.01561	3.07782	7.4568	0.00631972	0.148952
Tmem154	0.291401	6.41939	7.45261	0.00633445	0.148952
Apon	1.04949	0.371946	7.45195	0.00633679	0.148952
Necab3	0.848575	0.549459	7.4418	0.00637262	0.149499
9430015G10Rik	0.356096	5.93016	7.43652	0.00639133	0.149643
Arhgef2	0.23889	7.72341	7.41363	0.00647317	0.150996
1700048O20Rik	0.999069	2.11429	7.41325	0.00647453	0.150996
Prss30	2.18577	-0.814196	7.39693	0.00653354	0.151607
Klhl23	2.47925	-0.468224	7.39662	0.00653466	0.151607
Ccnb2	1.77438	3.41804	7.39348	0.00654607	0.151607
Mast2	0.37606	5.86013	7.389	0.00656239	0.151607
Rad54l	0.763172	4.7759	7.34161	0.00673764	0.153987
Col5a3	4.09922	3.0113	7.34161	0.00673765	0.153987
Cd276	1.0222	1.91234	7.3396	0.00674519	0.153987
Erlin1	0.329134	4.97893	7.32786	0.00678939	0.154699
Pdk3	0.47102	5.86811	7.31528	0.00683706	0.154963
E2f1	0.606312	5.16202	7.31469	0.00683932	0.154963
Car13	0.732838	2.16178	7.3145	0.00684004	0.154963
Cdc45	0.784295	4.98143	7.30629	0.00687135	0.155376
Ndc80	0.749032	4.53903	7.28851	0.0069397	0.156378
Nhlrc1	1.30334	-0.46901	7.28793	0.00694195	0.156378
Cenpa	0.538092	6.54134	7.26924	0.00701456	0.157172
Casc5	1.04079	4.22518	7.26866	0.00701682	0.157172
Mcm5	0.387554	8.10359	7.25602	0.00706637	0.157561
Tchp	0.446869	5.11303	7.23689	0.00714208	0.158027
Prtn3	3.55034	1.75397	7.23423	0.00715266	0.158027
Timeless	0.354239	6.55154	7.23136	0.00716411	0.158027
Brca2	0.446701	4.92827	7.22397	0.00719366	0.158027
Igsf8	0.542866	4.90097	7.21247	0.00723987	0.158027
Tmem38b	0.567323	3.24337	7.20828	0.00725679	0.158027
Arhgap19	0.891402	4.3748	7.20597	0.00726615	0.158027
Ngp	4.12439	2.38748	7.2048	0.0072709	0.158027
Cdk1	1.55335	4.4881	7.20169	0.00728348	0.158027
Zscan12	0.695952	2.91695	7.20084	0.00728695	0.158027
Stox2	1.87617	0.734559	7.19906	0.00729419	0.158027
Sertad4	4.40056	0.429838	7.18153	0.00736577	0.158999
Rgs12	0.879973	2.98698	7.17604	0.00738837	0.159171
Cit	0.917444	4.33513	7.17309	0.00740052	0.159171
Tnfaip8	0.266976	6.96593	7.1662	0.007429	0.159495
Lrp5	1.64614	1.90672	7.14288	0.0075262	0.160533
Asf1b	0.821365	4.98487	7.12678	0.00759409	0.160533
Tcf19	1.12018	4.74515	7.12037	0.0076213	0.160533
Racgap1	1.1072	5.01713	7.11998	0.00762298	0.160533
Cdca5	1.1128	4.26319	7.11373	0.00764956	0.160533
Ccnb1	1.36037	4.03385	7.11198	0.00765706	0.160533
Ddias	0.824329	2.60508	7.11025	0.00766446	0.160533
Dgkz	0.320382	8.62451	7.10886	0.0076704	0.160533
9530077C05Rik	1.13192	1.06033	7.1037	0.00769251	0.160533
Camp	3.73469	0.31005	7.10124	0.00770308	0.160533
Capn2	0.384387	4.62871	7.0983	0.00771569	0.160533
Zfp367	0.373668	5.46235	7.09593	0.00772593	0.160533
Haus4	0.541739	5.14287	7.09411	0.00773377	0.160533
Hmgb1	0.371692	8.58354	7.07063	0.00783575	0.161243
Pcna	0.429107	8.49788	7.06566	0.00785753	0.161412
Cbx5	0.345803	7.50385	7.04702	0.00793971	0.162347
Epb4.1l4b	1.87092	0.773983	7.0463	0.00794294	0.162347
Mtfr2	1.2084	2.51123	7.03962	0.00797258	0.162347
Gpr97	2.89007	1.30951	7.03802	0.0079797	0.162347
Ankrd27	0.263717	6.00635	7.03685	0.00798493	0.162347
Fam83d	1.41514	1.43984	7.02144	0.00805394	0.163149
Pold3	0.286395	6.44013	7.01886	0.00806556	0.163149
Cbfa2t3	0.568007	6.29591	7.01144	0.00809906	0.163549
Xkr5	1.42821	0.677645	6.99157	0.00818945	0.164625
Nt5dc2	1.20986	3.325	6.98201	0.00823329	0.164625
Zfp467	0.455491	3.84106	6.97284	0.0082756	0.164882
Kif20b	0.432767	5.00979	6.96976	0.00828985	0.164882
Nr4a2	1.17977	2.18257	6.96325	0.00832006	0.16498
Smc1a	0.268236	7.53342	6.95781	0.00834539	0.165095
Kntc1	0.924426	4.98394	6.95501	0.00835847	0.165095
A430105I19Rik	2.51617	-0.939715	6.95256	0.00836994	0.165095
Msh2	0.257436	6.24791	6.94127	0.00842295	0.165797
Odc1	0.265612	8.18642	6.93905	0.00843341	0.165797
Nudcd2	0.328427	4.90086	6.93319	0.00846105	0.166032
Kif15	1.07445	4.72095	6.90991	0.00857193	0.167688
Prim1	0.445586	5.57702	6.90078	0.0086158	0.16825
Pf4	3.06615	1.513	6.88004	0.00871635	0.169123
Bub1b	0.795438	5.57882	6.83939	0.00891691	0.172172
Cntln	0.780249	2.99395	6.83611	0.0089333	0.172209
Ap4m1	0.326675	5.03915	6.82023	0.00901307	0.172906
Ctsg	4.08657	1.45065	6.8166	0.00903143	0.172979
B3gntl1	0.361096	3.82511	6.80223	0.00910439	0.173816
Gcat	1.31026	0.31221	6.77497	0.00924453	0.175927
Zfp366	1.02964	0.714211	6.76775	0.00928198	0.176358
Tubgcp2	0.278718	5.71786	6.76152	0.00931442	0.176532
Grik5	0.851068	2.27902	6.75938	0.00932562	0.176532
Nsl1	0.811023	3.78526	6.75746	0.00933568	0.176532
Fxn	0.576648	3.89091	6.74879	0.00938112	0.176829
Gas2l3	1.08529	2.09152	6.72991	0.00948092	0.178224
Fam98c	0.358246	4.16503	6.72534	0.00950529	0.178224
Gins2	0.622619	4.50258	6.72143	0.0095261	0.178224
Cycs	0.374332	5.94693	6.7214	0.00952629	0.178224
Spc24	1.24524	4.40873	6.72069	0.00953008	0.178224
Sorbs3	1.04563	1.77004	6.71776	0.00954577	0.178238
Sh3rf1	0.518776	3.63044	6.70613	0.00960821	0.178812
Rasd1	0.966878	4.38889	6.70364	0.00962163	0.178812
2900026A02Rik	1.28581	3.99972	6.68243	0.00973679	0.18037
Cbx6	0.616121	6.1194	6.67912	0.00975485	0.18037
Ctla2a	1.55766	0.579838	6.67707	0.00976612	0.18037
Fus	0.237118	9.33163	6.65353	0.00989595	0.182484
Siglecf	2.0159	0.926825	6.65022	0.00991437	0.182541
Nusap1	1.60735	4.45378	6.6311	0.0100213	0.183798
Hjurp	0.455877	7.09429	6.62881	0.0100342	0.183798
Uaca	2.20913	-0.793083	6.62341	0.0100647	0.183798
Car9	1.03579	0.219931	6.61826	0.0100939	0.183798
Capsl	1.74161	-0.203526	6.61717	0.0101	0.183798
Taf9	1.18789	-0.0876875	6.61335	0.0101217	0.183798
Robo3	3.21361	-0.259354	6.60272	0.0101823	0.184616
Prc1	1.26609	3.94133	6.60001	0.0101978	0.184616
Cenpi	0.921217	3.17301	6.58628	0.0102768	0.185481
Zfhx3	1.78621	-0.622332	6.58009	0.0103126	0.185845
Megf9	0.45209	3.3134	6.56716	0.0103878	0.186738
Rag2	5.2368	0.0480757	6.56617	0.0103935	0.186738
Pidd1	0.552507	5.13718	6.55622	0.0104518	0.187502
Ckap5	0.299291	6.42987	6.5528	0.0104719	0.187579
Smc2	0.44602	6.29067	6.54793	0.0105006	0.187811
Orc6	0.459091	4.91174	6.5386	0.0105558	0.188515
S100a8	3.39045	2.14253	6.52148	0.0106579	0.189675
Iqgap3	1.69835	3.17999	6.51802	0.0106787	0.189675
Cenpe	1.12391	4.23861	6.51576	0.0106923	0.189675
Cdca3	1.56204	4.19669	6.5137	0.0107047	0.189675
Mastl	1.00338	2.45883	6.50402	0.0107631	0.189675
Kif11	1.44198	5.49514	6.50339	0.0107669	0.189675
Brip1	0.949377	3.90142	6.50119	0.0107802	0.189675
Rab44	2.99186	2.53054	6.49789	0.0108003	0.189746
Cd5	1.00631	3.08473	6.48379	0.0108863	0.190724
St3gal4	0.591335	3.47114	6.48107	0.0109029	0.190724
Hspa14	0.528933	2.99496	6.48089	0.010904	0.190724
Pif1	1.98167	1.60677	6.47244	0.010956	0.191073
Pla2g4c	0.833954	0.924917	6.47243	0.0109561	0.191073
Pbk	1.50915	3.16076	6.4631	0.0110137	0.19165
Olfr1330	4.09421	0.034383	6.45504	0.0110638	0.192107
Itga2b	1.87498	2.51212	6.43716	0.0111757	0.193214
Cd200r4	1.63154	-0.39998	6.43706	0.0111763	0.193214
Oip5	1.03696	2.75708	6.42529	0.0112506	0.193727
Ncapg	1.15534	4.40656	6.42128	0.0112761	0.193727
Fzd6	1.11863	0.954682	6.42033	0.0112821	0.193727
Hmmr	1.72761	3.3075	6.4195	0.0112874	0.193727
Col18a1	0.91408	-0.00382091	6.40933	0.0113522	0.194262
Camk2n2	0.992616	0.999351	6.40692	0.0113676	0.194262
Clstn1	0.573721	3.4462	6.3991	0.0114178	0.194328
Gm13212	0.573663	4.67006	6.38761	0.011492	0.195265
Rnf26	0.625474	2.17572	6.38165	0.0115306	0.195378
Traip	0.760828	3.75312	6.37711	0.0115601	0.195585
Zfp101	0.345837	4.21957	6.36635	0.0116305	0.196217
Plk1	1.68404	3.7496	6.35015	0.0117371	0.197165
Ube2t	0.59898	2.96727	6.3457	0.0117666	0.197165
Bad	0.395739	3.79709	6.32939	0.0118753	0.1981
Smc3	0.22745	6.86987	6.32689	0.0118921	0.198101
Rfc4	0.467012	4.82006	6.3188	0.0119464	0.198646
BC030867	1.3036	3.0873	6.31285	0.0119866	0.198764
Ucp2	0.620083	10.1461	6.30557	0.0120359	0.198983
Mybl1	0.680851	2.49796	6.29563	0.0121036	0.199524
mt-Cytb	0.718185	11.191	6.29445	0.0121117	0.199524
Ifitm2	0.810768	4.12743	6.28378	0.0121848	0.200174
Hirip3	0.438706	5.91097	6.28077	0.0122055	0.200238
Hist1h3a	0.990652	1.10214	6.27646	0.0122352	0.200366
Gm2237	0.733015	1.54655	6.27475	0.012247	0.200366
Zscan30	1.02028	0.113038	6.26222	0.0123339	0.201096
Ect2	0.665208	3.73516	6.26101	0.0123424	0.201096
Ska1	1.49709	2.2593	6.24309	0.0124679	0.201989
Cdan1	0.359922	5.48824	6.2419	0.0124763	0.201989
Slbp	0.320332	6.5787	6.24107	0.0124821	0.201989
Sgol2	1.01708	1.96454	6.23239	0.0125434	0.202706
Gpr68	1.05433	1.5086	6.22538	0.0125932	0.202747
Naprt	0.668985	1.57884	6.22483	0.0125971	0.202747
Mdm1	0.503441	3.88313	6.19555	0.0128072	0.205571
Rwdd2b	0.383632	4.2828	6.19001	0.0128474	0.205662
F12	2.78815	-1.01853	6.17265	0.012974	0.206509
Nyx	1.47133	2.08314	6.171	0.0129861	0.206509
Hat1	0.354952	6.1972	6.1685	0.0130045	0.206509
Oplah	0.858256	1.16992	6.15026	0.0131393	0.208094
Lmo4	0.56478	5.94314	6.13911	0.0132224	0.208854
Lrmp	0.382803	9.70978	6.12712	0.0133123	0.209996
Lmf2	0.364379	6.27135	6.11774	0.0133832	0.210834
Emilin1	2.2196	1.6945	6.11399	0.0134116	0.211002
Tpx2	1.54132	4.6265	6.10639	0.0134694	0.211408
Ube2s	0.573922	5.79543	6.10323	0.0134935	0.211452
Vsig10	0.76361	2.61774	6.09371	0.0135664	0.212314
Chaf1b	0.552317	4.88991	6.08361	0.0136442	0.213247
Spred3	0.859838	0.570773	6.08132	0.0136618	0.213247
Gatm	1.69818	0.284097	6.06513	0.0137877	0.214001
Cldn12	0.627766	1.44228	6.06358	0.0137998	0.214001
Top2a	1.27692	7.23487	6.06353	0.0138001	0.214001
Bard1	0.896108	3.89069	6.05818	0.013842	0.214269
Prr11	1.39976	2.80855	6.05673	0.0138534	0.214269
Lmcd1	1.05822	-0.263397	6.04684	0.0139312	0.215192
Hdac7	0.309059	8.63536	6.03452	0.0140288	0.216418
Hist1h3e	1.0214	0.0333492	6.0309	0.0140576	0.216582
Spata24	0.435125	3.63926	6.02665	0.0140914	0.216601
Mum1	0.227808	6.72107	6.02389	0.0141135	0.216601
Slc22a15	0.66129	1.79051	6.01034	0.0142223	0.217709
Ywhah	0.321214	7.54502	6.00626	0.0142552	0.217932
Usp2	0.950042	0.909398	5.9873	0.0144092	0.219305
Crip2	0.858457	1.29666	5.98613	0.0144188	0.219305
Ramp1	2.16656	0.971253	5.98159	0.014456	0.219591
Tmpo	0.295403	7.85408	5.97276	0.0145286	0.220038
Ccdc138	0.506364	2.49511	5.97175	0.0145368	0.220038
Slc25a10	0.601815	4.52452	5.97125	0.0145409	0.220038
Prss34	3.15607	3.13551	5.96038	0.0146309	0.220911
Myb	1.3371	6.18994	5.95941	0.014639	0.220911
Palm	1.13079	3.43526	5.95756	0.0146543	0.220911
Sgol1	0.988875	3.14432	5.95033	0.0147146	0.221538
Ptpn14	0.753843	3.46874	5.94616	0.0147494	0.221748
Kif2c	1.47167	3.21716	5.9442	0.0147658	0.221748
Zfp579	0.574714	4.81721	5.92448	0.0149319	0.223686
Depdc1b	1.68892	0.950815	5.92442	0.0149325	0.223686
Tns4	2.1869	-1.20817	5.92002	0.0149698	0.223964
Rfc2	0.354852	7.11029	5.9124	0.0150347	0.2242
Polq	0.531309	4.08443	5.91153	0.0150421	0.2242
Gpat2	2.08453	-0.123918	5.91152	0.0150422	0.2242
Nxt1	0.349413	4.87095	5.90458	0.0151016	0.224804
Svil	0.495379	4.93238	5.89147	0.0152144	0.226199
Inf2	0.438701	6.66571	5.87801	0.0153311	0.227367
Foxp4	0.339543	8.13568	5.87227	0.0153812	0.22758
Lmo7	0.753407	1.45603	5.86761	0.015422	0.22758
Ret	2.37149	1.25797	5.84887	0.0155871	0.229163
Slco3a1	2.2662	0.845325	5.83764	0.0156869	0.230061
Fam64a	1.89331	1.69265	5.83504	0.0157101	0.230118
Tmod1	2.607	0.493831	5.82498	0.0158002	0.231153
Zfand4	0.745043	1.63277	5.80351	0.0159942	0.232846
Dsn1	0.338035	4.60018	5.79354	0.0160852	0.232935
Fabp4	2.06202	0.0559395	5.79261	0.0160937	0.232935
Ccdc28b	0.701411	4.8714	5.79211	0.0160982	0.232935
Atad5	0.48574	5.00981	5.77944	0.0162147	0.233658
E2f8	1.61361	4.23201	5.77671	0.0162399	0.233658
6430548M08Rik	1.34862	2.23787	5.77601	0.0162464	0.233658
Bcr	0.373859	5.20914	5.76004	0.0163947	0.235505
Acvr2b	1.27732	-0.602333	5.75546	0.0164375	0.235835
Cmc2	0.614499	3.06631	5.75051	0.0164839	0.235923
A430093F15Rik	0.973216	2.58427	5.74846	0.0165031	0.235923
Sspn	0.756475	4.06686	5.74318	0.0165528	0.23635
Pkn3	0.629121	2.20466	5.73699	0.0166112	0.236899
Mybl2	0.885742	5.27854	5.73113	0.0166668	0.237407
Hist1h2ae	0.950274	0.617754	5.72796	0.0166969	0.237551
Shisa8	0.538951	7.56347	5.7234	0.0167403	0.237683
Dnajb9	0.338304	4.63707	5.72279	0.0167461	0.237683
Gins4	0.382456	5.1216	5.70907	0.0168775	0.238766
Etnk2	1.80595	0.263677	5.70708	0.0168966	0.238766
Cyth3	0.498242	3.99129	5.70645	0.0169027	0.238766
Ska3	1.06455	2.91152	5.69875	0.016977	0.239531
Cebpe	3.56111	-0.568981	5.68354	0.0171248	0.239968
Nuf2	1.47768	3.86536	5.6796	0.0171633	0.239968
Nrxn1	1.78841	-0.629469	5.67894	0.0171697	0.239968
Rfc5	0.481984	5.9225	5.67787	0.0171802	0.239968
Fanci	0.495794	4.2074	5.67648	0.0171938	0.239968
Abhd16a	0.300624	5.7674	5.67471	0.0172111	0.239968
Olfm1	1.83662	0.0963105	5.6728	0.0172299	0.239968
1700040L02Rik	1.05979	-0.848088	5.66549	0.0173019	0.240407
Hdhd2	0.280735	4.53505	5.66071	0.0173491	0.2407
Zfp827	0.764521	4.43594	5.65926	0.0173634	0.2407
Hist1h4i	0.693308	2.69869	5.65464	0.0174093	0.241054
Cercam	0.634699	1.57955	5.64599	0.0174954	0.241259
Ppp1r26	1.19848	-0.419315	5.6456	0.0174992	0.241259
Gbp8	0.59729	1.75249	5.645	0.0175052	0.241259
Nfe2	3.45186	1.42764	5.63029	0.0176527	0.24249
Stra13	0.51239	5.17957	5.63	0.0176557	0.24249
Mcm8	0.42287	4.07479	5.62734	0.0176824	0.242578
Pde4c	1.56745	1.96311	5.62041	0.0177525	0.243259
Kif13a	0.618975	3.59692	5.61139	0.0178441	0.243671
Zdhhc6	0.262136	5.70184	5.60816	0.017877	0.243841
Srgap3	1.2701	1.85651	5.59983	0.0179622	0.244174
Hells	0.411295	6.47329	5.58888	0.0180749	0.245067
Slc6a13	1.55129	-0.8468	5.57258	0.0182438	0.245433
Paox	0.38971	3.74972	5.57221	0.0182477	0.245433
Baiap2	0.462191	5.28954	5.57165	0.0182536	0.245433
Derl3	0.920584	3.4896	5.57149	0.0182552	0.245433
Tubg1	0.443237	5.47744	5.57146	0.0182555	0.245433
Nt5c2	0.215759	6.02437	5.57041	0.0182665	0.245433
Snx16	0.611655	2.00789	5.56757	0.0182962	0.245433
Fam209	1.07944	-0.110219	5.56599	0.0183127	0.245433
Plk4	0.476352	4.74347	5.5612	0.0183628	0.245433
Pgrmc1	0.306981	5.65383	5.5551	0.0184269	0.245623
Sapcd2	1.62541	2.35631	5.55365	0.0184422	0.245623
Ms4a7	1.37734	0.686576	5.55093	0.0184709	0.245623
Siva1	0.467181	4.82512	5.55043	0.0184761	0.245623
Ggn	1.22163	-0.467909	5.54679	0.0185146	0.245623
Mxd3	1.44169	2.18866	5.54591	0.018524	0.245623
Tdp2	0.241333	5.56503	5.53382	0.0186524	0.246653
Tyms	0.878379	4.74838	5.53242	0.0186672	0.246653
E2f7	1.2883	2.80798	5.53171	0.0186748	0.246653
Mvb12b	1.4788	1.91938	5.5308	0.0186846	0.246653
Melk	1.11005	3.62573	5.51345	0.0188708	0.24856
Itpka	1.0224	-0.103659	5.51149	0.0188919	0.248563
Ube2c	2.03338	3.85171	5.50155	0.0189996	0.249058
Pkd2	1.85866	-0.751299	5.4942	0.0190797	0.249377
Kcnh7	1.13232	0.278576	5.49206	0.019103	0.249409
Ube2a	0.419451	5.77885	5.48291	0.0192033	0.250258
Acoxl	1.27869	0.253533	5.48228	0.0192101	0.250258
Nol4l	0.937218	2.15424	5.46359	0.0194167	0.251427
Ankle1	1.87162	3.37823	5.46269	0.0194267	0.251427
Neo1	1.43743	-0.360153	5.45852	0.0194732	0.251754
Anapc11	0.409271	5.63994	5.45587	0.0195027	0.251862
Cplx2	2.03683	3.89447	5.44187	0.0196597	0.253339
Ppwd1	0.319376	4.58756	5.42372	0.019865	0.255426
Sirpa	0.980861	6.58651	5.42187	0.0198861	0.255426
Myl4	1.43086	2.27679	5.41604	0.0199526	0.255803
Ypel4	4.20717	0.0597071	5.41352	0.0199814	0.255803
Clspn	1.19717	4.83268	5.41269	0.0199908	0.255803
Poc1a	0.706398	3.35909	5.41177	0.0200014	0.255803
Rad18	0.346709	4.71185	5.40453	0.0200845	0.256315
Kpna2	0.405295	6.54098	5.39929	0.0201449	0.256432
Egr2	0.386015	6.69078	5.39556	0.0201881	0.256432
Sema6d	0.820537	3.65552	5.39471	0.0201979	0.256432
Gm3604	0.470078	2.31855	5.38718	0.0202852	0.25722
Gpr55	0.752583	2.63547	5.38314	0.0203322	0.257443
Cenpf	1.79671	3.29744	5.37734	0.0203999	0.257443
Dna2	0.753228	3.81348	5.37339	0.0204462	0.257443
Crocc	0.27873	5.10482	5.37332	0.020447	0.257443
Lcn2	3.49398	0.527952	5.36901	0.0204976	0.257443
Srsf4	0.259189	5.42489	5.36308	0.0205674	0.258048
Gstt3	0.815288	2.00307	5.36086	0.0205936	0.258103
Tex9	0.443592	3.56305	5.35147	0.0207048	0.25914
Plekhh3	0.836836	0.0857315	5.3502	0.0207199	0.25914
Birc5	1.50487	4.23809	5.33971	0.0208449	0.260043
Ms4a3	3.35815	-0.356122	5.33835	0.0208612	0.260043
Commd10	0.322695	4.49716	5.33682	0.0208796	0.260043
Lgr5	1.90158	1.43959	5.33167	0.0209413	0.260212
Spag5	1.32653	4.36505	5.3284	0.0209806	0.260212
H1f0	1.23233	3.47486	5.32383	0.0210358	0.2604
Atp1b1	1.45754	5.05223	5.32351	0.0210396	0.2604
Tjp2	0.607274	4.01279	5.3191	0.0210928	0.260628
Tmem240	1.06313	0.83131	5.31836	0.0211018	0.260628
F2rl2	2.97236	-0.935194	5.31455	0.0211481	0.260905
Sgsm1	3.27507	-1.29695	5.3129	0.0211681	0.260905
Plxnb1	0.857591	0.288515	5.30824	0.0212248	0.260947
C330027C09Rik	0.754895	4.24027	5.30721	0.0212373	0.260947
Sla2	0.867109	1.07173	5.30096	0.0213137	0.261292
Armc2	1.18036	-0.318251	5.29752	0.0213558	0.261292
Kctd13	0.337011	4.5296	5.29569	0.0213783	0.261292
Vpreb3	1.12588	5.12668	5.29367	0.0214031	0.261292
Gsg2	0.534288	3.43394	5.29204	0.0214231	0.261292
Cand2	0.406032	3.32717	5.29059	0.0214409	0.261292
Metrnl	1.1085	1.43173	5.28228	0.0215435	0.261401
Kdr	2.03759	0.719101	5.27849	0.0215904	0.261401
Cecr2	0.745149	5.80256	5.27386	0.0216479	0.261401
2021-09-08	1.51052	0.655338	5.26755	0.0217266	0.261852
Kif24	0.550979	2.95458	5.26665	0.0217378	0.261852
Selm	1.28352	-0.58604	5.26508	0.0217574	0.261852
Aunip	1.14548	2.00061	5.2634	0.0217785	0.261852
Trip13	0.503534	4.13549	5.25583	0.0218733	0.26247
Slco4a1	0.648373	5.29446	5.25135	0.0219297	0.262671
Rab3il1	2.23116	0.289768	5.24348	0.0220292	0.262827
Mansc1	1.1431	-0.591399	5.23433	0.0221453	0.26366
Ccdc102a	1.05599	0.0988042	5.22961	0.0222055	0.264112
Ptms	0.61508	6.63428	5.2278	0.0222286	0.264123
H2afv	0.523718	5.71261	5.22226	0.0222996	0.264702
Cdca7	0.279863	6.62148	5.21646	0.0223741	0.265321
Tceal8	1.1918	0.957146	5.21348	0.0224124	0.265512
Cbln3	1.22564	-0.756525	5.20847	0.0224771	0.265898
Ccdc14	0.4086	3.36183	5.20734	0.0224917	0.265898
Tube1	0.503064	3.21605	5.20576	0.0225122	0.265898
Lrwd1	0.308013	5.91696	5.20335	0.0225434	0.266003
2200002D01Rik	0.844523	0.544222	5.19606	0.0226381	0.266856
Ephb6	1.11692	-0.132351	5.19001	0.0227171	0.267522
Slc4a10	1.48757	-0.783551	5.18128	0.0228315	0.268338
Nek2	1.3199	3.50928	5.1737	0.0229313	0.268599
Axin2	1.34085	-0.454367	5.17162	0.0229588	0.268599
Drp2	1.03109	-0.850532	5.16939	0.0229883	0.268599
Lgals1	0.914511	4.24382	5.16913	0.0229918	0.268599
Dntt	3.16195	0.167043	5.16677	0.023023	0.268599
2810417H13Rik	1.20829	6.49811	5.16574	0.0230367	0.268599
Gas7	2.05607	2.75762	5.16436	0.0230549	0.268599
Trim15	1.42081	-0.857876	5.1625	0.0230796	0.268599
Pparg	2.09422	-0.815803	5.15798	0.0231398	0.269036
Kif18b	1.50415	3.57306	5.14964	0.0232512	0.270068
Aicda	1.70789	0.294112	5.13939	0.0233889	0.271138
Fam132a	0.639768	2.47758	5.13266	0.0234797	0.271772
Orc1	0.421902	3.73902	5.11887	0.0236671	0.272991
Kit	1.12977	3.40476	5.11882	0.0236677	0.272991
Casp3	0.43709	5.56915	5.10723	0.0238264	0.273648
Snca	4.23518	1.58045	5.10656	0.0238355	0.273648
Endod1	0.681247	5.34331	5.10243	0.0238924	0.273773
B230216G23Rik	1.00965	-0.643433	5.09718	0.0239648	0.274338
Dock5	0.931289	1.98983	5.09339	0.0240172	0.27441
Cd44	0.25653	7.39231	5.09069	0.0240547	0.274574
Alms1	0.491135	3.73476	5.08586	0.0241217	0.275075
Elmo2	0.343634	5.93546	5.07673	0.024249	0.275734
Ssna1	0.406992	5.41433	5.06928	0.0243535	0.276393
Spice1	0.283696	4.95845	5.06514	0.0244117	0.27679
Sms	0.222037	7.17688	5.05359	0.024575	0.277877
Abcd2	2.26852	-0.296579	5.0534	0.0245776	0.277877
Cep55	0.815871	3.86273	5.03973	0.0247723	0.279073
Zbtb32	0.714797	3.41885	5.03938	0.0247773	0.279073
1700025G04Rik	1.2983	-0.217675	5.03452	0.024847	0.279593
Carhsp1	0.344965	5.69738	5.03137	0.0248921	0.279753
Dnmt3a	0.346098	6.93342	5.02967	0.0249167	0.279753
Igfbp4	2.37932	1.00192	5.02862	0.0249318	0.279753
Asf1a	0.419847	4.28713	5.02521	0.0249809	0.280041
Adamts7	2.06107	1.03216	5.02156	0.0250337	0.280368
Ckap2l	1.23546	3.7262	5.01882	0.0250733	0.280547
Wdr76	0.326838	5.10049	5.00728	0.025241	0.281893
Cadm1	1.42118	0.594565	5.00133	0.0253278	0.282597
Esco2	1.23491	3.52718	4.99715	0.0253891	0.282774
Cep57l1	0.426235	3.84644	4.99539	0.025415	0.282774
Bglap3	3.27638	0.711142	4.99055	0.0254862	0.283301
Lrrc59	0.244827	7.01855	4.9806	0.0256331	0.284215
Ass1	0.65373	5.46955	4.98013	0.02564	0.284215
Fbxw10	0.551497	2.42205	4.96899	0.0258058	0.28552
Cks1b	0.735739	4.59484	4.96243	0.0259037	0.285759
Ccne2	0.775901	3.53252	4.95987	0.0259422	0.285759
Trpm5	0.922916	2.46985	4.95951	0.0259475	0.285759
Efcab8	0.787504	0.307351	4.95669	0.0259899	0.285961
2700029M09Rik	0.317984	5.73403	4.95164	0.0260659	0.286532
Chrnb1	0.448792	4.38703	4.94438	0.0261756	0.28712
P2rx3	1.16437	-0.00532537	4.94137	0.0262212	0.28712
Gm9821	0.604099	4.11568	4.94013	0.0262401	0.28712
Tbc1d10b	0.290418	6.68926	4.93587	0.0263049	0.287506
Ctc1	0.289515	6.15395	4.93463	0.0263237	0.287506
Lmnb1	0.51413	7.27139	4.93151	0.0263713	0.287761
Csf2ra	0.78888	5.81287	4.9288	0.0264127	0.287949
Lca5	0.443413	2.75561	4.92617	0.0264528	0.288123
Nup85	0.274932	6.60182	4.92168	0.0265217	0.288161
Atxn1	0.387761	5.76266	4.91829	0.0265738	0.288161
Pole2	0.321563	3.98438	4.91808	0.026577	0.288161
Abcb6	0.872504	0.663183	4.91805	0.0265775	0.288161
Ptpn3	1.32655	0.836463	4.91493	0.0266256	0.288286
Ncoa7	0.285628	5.1332	4.91365	0.0266453	0.288286
Uimc1	0.248359	6.03466	4.91237	0.0266651	0.288286
mt-Nd4	0.635891	9.82647	4.91049	0.0266941	0.288286
Rab27a	0.347581	4.96766	4.90945	0.0267102	0.288286
Cc2d1a	0.242967	5.87491	4.90369	0.0267994	0.288986
Rmi2	0.632669	4.1828	4.8935	0.0269579	0.289725
Akap12	0.622332	5.90996	4.89303	0.0269654	0.289725
Nudc	0.350731	7.08296	4.8891	0.0270268	0.289781
Ankrd9	0.489489	2.75809	4.88904	0.0270277	0.289781
Unc5a	1.38186	-0.362831	4.88324	0.0271187	0.290324
Dut	0.471575	6.43775	4.88051	0.0271616	0.290522
Sdpr	3.12997	-1.32378	4.87532	0.0272434	0.290653
Hmg20b	0.312294	6.44913	4.87192	0.0272971	0.290653
Cep250	0.297361	6.55348	4.86963	0.0273334	0.290653
Ldlrad4	0.578965	2.48563	4.86869	0.0273483	0.290653
Cst7	1.1144	1.06463	4.86736	0.0273694	0.290653
Rrm2	1.1687	6.08832	4.85767	0.0275234	0.291508
Efnb1	0.561926	2.45486	4.85072	0.0276345	0.292181
Smarca4	0.241605	8.08353	4.85063	0.0276361	0.292181
Hist1h2be	0.891294	0.263302	4.83939	0.0278167	0.293569
Rpa2	0.302212	6.12356	4.83413	0.0279017	0.293885
Ppp2r5d	0.285106	6.2919	4.83388	0.0279058	0.293885
Msh5	0.525569	3.25944	4.83248	0.0279284	0.293885
Mcm3	0.300357	8.10462	4.83143	0.0279455	0.293885
Wdr34	0.468513	2.90533	4.82578	0.0280371	0.294431
Ctnnal1	0.45352	3.01827	4.82415	0.0280637	0.294431
Galnt14	0.901508	0.891392	4.82366	0.0280717	0.294431
Tagln2	0.38632	8.28717	4.81931	0.0281426	0.294677
Cyth2	0.335103	5.4776	4.81194	0.0282632	0.295398
Steap4	2.55912	0.704653	4.80893	0.0283126	0.295654
Dixdc1	1.16406	-0.595607	4.80618	0.0283578	0.295866
Fam174b	1.93685	-0.858674	4.76485	0.0290467	0.30173
Thoc7	0.270135	5.11956	4.75871	0.0291503	0.302543
Chek2	0.354353	4.17815	4.75654	0.0291871	0.30266
Pdzk1ip1	2.83187	-0.110659	4.75445	0.0292226	0.302705
Rab24	0.51317	3.90932	4.75311	0.0292453	0.302705
Gins3	0.403941	3.87528	4.74579	0.0293701	0.303047
Hcar2	2.23409	-1.05753	4.7442	0.0293972	0.303047
Dhrs13	0.442434	1.99694	4.73361	0.0295787	0.304597
Ppfia4	1.38833	1.56296	4.72884	0.0296609	0.304716
Ypel1	0.652869	1.67548	4.7247	0.0297324	0.304716
Gm10282	0.376652	5.1763	4.72369	0.0297498	0.304716
Fuom	0.743902	0.182752	4.72336	0.0297556	0.304716
Arhgap32	1.65491	0.23543	4.72255	0.0297696	0.304716
Wnk2	1.29569	-0.840904	4.71798	0.0298488	0.30508
Tubd1	0.425818	2.83661	4.71612	0.0298812	0.30508
Pla2g15	0.416114	4.38372	4.71458	0.0299078	0.30508
Egln3	1.92631	0.93672	4.70977	0.0299917	0.305328
Chil3	3.14034	1.73523	4.70877	0.0300091	0.305328
Oxct1	0.269545	7.11469	4.70346	0.0301019	0.305828
Eri1	0.204681	6.11604	4.70302	0.0301097	0.305828
Cks2	0.678691	4.47013	4.69806	0.0301967	0.305929
Ccdc18	0.602064	1.83777	4.69528	0.0302455	0.306162
Ccl2	2.97003	-0.968352	4.69329	0.0302806	0.306256
Gas2l1	0.872638	1.03133	4.66967	0.0306998	0.309281
Arhgap10	0.525448	2.32033	4.66912	0.0307097	0.309281
Syce2	0.380093	3.47686	4.66252	0.0308278	0.309762
Med12l	0.76752	0.937447	4.66209	0.0308356	0.309762
Tubb5	0.367444	10.269	4.64805	0.0310889	0.31066
Zc3h12c	0.519239	5.00292	4.64625	0.0311214	0.31066
Itm2c	0.632806	5.02066	4.64337	0.0311737	0.31066
Fmn2	1.32715	0.354719	4.64317	0.0311774	0.31066
Ttl	0.401304	3.37382	4.64211	0.0311966	0.31066
Pnn	0.282592	7.52352	4.64043	0.0312271	0.31066
Fancm	0.357106	5.08033	4.64032	0.0312292	0.31066
Neurl1b	1.65577	-0.0920637	4.63966	0.0312412	0.31066
Cenpk	0.880642	2.76806	4.6388	0.0312568	0.31066
Cenpm	0.696372	4.01049	4.63804	0.0312708	0.31066
Cdh24	0.477974	4.86959	4.63529	0.0313208	0.310701
Sh2b2	0.388699	4.9332	4.63216	0.031378	0.311005
Serpina3f	1.67659	1.3575	4.62932	0.03143	0.311005
Zan	1.63408	0.518324	4.62458	0.0315169	0.311089
Chdh	1.94976	0.627761	4.61819	0.0316345	0.311474
Rfc3	0.377581	5.21611	4.61408	0.0317104	0.311963
Wee1	0.454484	5.26267	4.60751	0.0318323	0.312904
Plekhm2	0.324748	5.58561	4.59666	0.0320343	0.313733
Rab27b	2.50295	-0.845975	4.5959	0.0320486	0.313733
Plvap	0.924819	-0.281976	4.57995	0.0323482	0.316146
Slc35f2	0.516279	2.30415	4.57736	0.032397	0.316363
Eml6	0.883199	0.448725	4.5755	0.0324323	0.316405
Pik3r6	1.10543	2.35037	4.57371	0.0324661	0.316405
Mnd1	0.965224	1.43334	4.56735	0.0325869	0.316405
Plcb4	1.7989	-0.423368	4.56626	0.0326076	0.316405
Smim4	0.448136	2.93746	4.56541	0.0326239	0.316405
Nlrp1b	1.1505	0.145366	4.56414	0.0326481	0.316405
Samd1	0.375412	5.97845	4.56313	0.0326673	0.316405
Arap3	1.58776	1.26795	4.54019	0.0331079	0.318854
Prg2	2.63968	3.82476	4.53591	0.0331909	0.319046
Cdh23	0.952582	1.24249	4.53365	0.0332347	0.319046
Qprt	1.39286	-0.135368	4.5336	0.0332356	0.319046
Arl3	0.350809	4.2134	4.53191	0.0332685	0.319046
Maz	0.375805	8.31541	4.53128	0.0332807	0.319046
Cd200r3	2.81074	-0.220577	4.53047	0.0332964	0.319046
Man1c1	1.24359	2.05631	4.52635	0.0333768	0.319376
Rad51ap1	0.720809	4.22722	4.52113	0.0334786	0.319599
Zfyve21	0.434494	3.0396	4.52102	0.0334808	0.319599
Tbxas1	1.87519	0.897165	4.51686	0.0335623	0.319864
Kcnj2	1.34281	0.304639	4.51437	0.0336113	0.320074
Mpl	3.83689	-1.05972	4.5081	0.0337346	0.320793
Gas8	0.462973	2.89843	4.5016	0.0338631	0.321187
Trim11	0.240835	7.00511	4.49861	0.0339225	0.321493
Rhpn2	0.899028	0.0822575	4.49626	0.0339691	0.321679
Zgrf1	0.41275	4.28542	4.49319	0.0340302	0.321822
Bsn	0.633171	2.68899	4.4904	0.0340858	0.321861
Nelfe	0.391568	5.5588	4.48985	0.0340966	0.321861
Itgb1	0.297051	6.72647	4.48759	0.0341419	0.322033
Map2	1.03692	2.01317	4.47799	0.034334	0.323327
Rnaseh2b	0.368924	5.00439	4.47099	0.034475	0.323606
Vangl2	0.621863	4.098	4.47025	0.0344899	0.323606
Tmbim1	0.486425	3.73256	4.46882	0.0345188	0.323606
Tifa	0.741712	5.43692	4.46674	0.0345609	0.323606
Depdc1a	1.01168	2.44548	4.46643	0.0345671	0.323606
Loxl3	0.810499	1.30432	4.46161	0.0346647	0.323606
Tapbpl	0.283458	5.9006	4.46039	0.0346896	0.323606
Ngfrap1	0.487911	4.46677	4.45576	0.0347838	0.323977
Itgb1bp2	0.749785	0.489323	4.4492	0.0349176	0.324969
Zbtb20	0.563869	5.33036	4.43324	0.0352456	0.327509
Prdx5	0.390505	6.28362	4.42864	0.0353406	0.3277
Eea1	0.36165	5.963	4.42842	0.0353453	0.3277
Ticam2	0.31076	4.55473	4.42687	0.0353773	0.327708
Mtrf1l	0.359587	3.84957	4.39969	0.0359455	0.331938
Shf	0.58222	2.48576	4.39489	0.0360468	0.332615
Fam173a	0.328174	5.83096	4.38955	0.0361599	0.3334
Rcbtb2	0.31608	4.74808	4.38664	0.0362217	0.333711
Mgl2	2.7082	0.0100729	4.37905	0.0363833	0.334425
Slc43a3	0.521027	5.4011	4.37772	0.0364117	0.334425
Cenpw	0.531972	2.95333	4.37445	0.0364816	0.334808
Cx3cr1	2.0481	2.17914	4.37236	0.0365264	0.33482
Rfwd3	0.249994	6.90579	4.36696	0.0366423	0.33482
H2afj	0.353015	6.21257	4.36454	0.0366945	0.33482
Rilp	0.849248	0.0656539	4.36157	0.0367584	0.33482
Hmcn2	0.732046	0.889832	4.3613	0.0367643	0.33482
Cep152	0.273129	5.08763	4.35038	0.0370006	0.335885
Bcl2l11	0.283591	7.93227	4.34938	0.0370224	0.335885
Adamts6	0.303619	6.14421	4.34717	0.0370704	0.336064
Gm6034	1.13527	-0.581069	4.34505	0.0371167	0.336162
Rsph1	1.96437	-0.909913	4.34408	0.0371378	0.336162
Cdk2ap1	0.407226	5.98026	4.33902	0.0372483	0.336859
Creld1	0.297531	4.36696	4.33797	0.0372714	0.336859
Plscr1	0.575076	5.11386	4.3268	0.0375167	0.337536
Ppbp	1.28878	0.0774657	4.32175	0.0376282	0.337993
Ppt2	0.713517	2.35986	4.32092	0.0376465	0.337993
Mrpl13	0.290855	5.31574	4.3196	0.0376757	0.337993
Uchl5	0.300637	5.28676	4.31936	0.037681	0.337993
Tdrkh	0.676352	1.24612	4.31557	0.037765	0.338096
Tcirg1	0.388145	7.30771	4.31193	0.0378459	0.338096
Rhno1	0.267569	5.54162	4.30958	0.0378982	0.338096
Hdlbp	0.171953	7.97033	4.30861	0.03792	0.338096
Tpgs1	0.353789	4.77726	4.30578	0.0379831	0.338406
Coa6	0.357139	3.52374	4.28502	0.0384495	0.341793
Cspp1	0.262388	5.16486	4.28203	0.0385173	0.342139
Prkra	0.414665	2.5992	4.27661	0.0386404	0.342825
Dbf4	0.391971	4.79328	4.27373	0.0387059	0.342825
Ager	0.492352	2.68449	4.2727	0.0387294	0.342825
Ptprs	0.556324	6.40066	4.27103	0.0387674	0.342825
Ccna2	1.34521	5.12692	4.26484	0.038909	0.343598
Ifih1	0.932328	3.66799	4.26468	0.0389126	0.343598
Tssc4	0.335125	5.23526	4.25976	0.0390254	0.344101
Meaf6	0.267493	5.82834	4.25662	0.0390977	0.344466
Erg	1.43212	-0.263706	4.25418	0.0391537	0.34458
Ltbp3	1.40248	-0.533072	4.24222	0.0394306	0.346372
Tuba1b	0.352762	9.23459	4.23556	0.0395855	0.347476
Cuedc2	0.329295	5.86303	4.23414	0.0396186	0.34751
Ap1s1	0.379999	5.19542	4.23234	0.0396607	0.347623
Cacna2d4	0.504877	2.68859	4.2289	0.0397413	0.348073
Ttf2	0.261496	5.48138	4.22739	0.0397765	0.348125
Cdca2	1.00113	3.93722	4.22305	0.0398784	0.34845
Ctnnbip1	0.675362	1.58492	4.223	0.0398795	0.34845
Heatr9	1.11616	-0.59285	4.22206	0.0399016	0.34845
Ccdc91	0.354662	3.62004	4.22053	0.0399378	0.348511
Zdhhc1	0.47472	2.86909	4.21684	0.0400247	0.349013
Cdc42ep3	0.477054	3.72457	4.21026	0.0401802	0.3496
Zfp612	0.804678	0.72131	4.20577	0.0402866	0.350014
Col9a3	0.613145	1.73127	4.19433	0.0405594	0.351803
Nat8l	1.58126	0.329079	4.18762	0.0407203	0.352185
Cenpp	0.852073	1.43088	4.18243	0.0408452	0.352185
Hdac1	0.208649	7.97867	4.18174	0.0408618	0.352185
Cenpl	0.568541	3.28847	4.18172	0.0408623	0.352185
Hnrnpu	0.16337	10.1348	4.17392	0.0410506	0.352944
Pold2	0.319879	5.97143	4.17276	0.0410789	0.352944
Alg6	0.350937	3.58152	4.17186	0.0411006	0.352944
Ralgps1	0.294112	4.24756	4.16786	0.0411978	0.353193
Rnf168	0.20694	5.55575	4.16236	0.0413317	0.353193
Plag1	0.826119	0.661376	4.16186	0.0413439	0.353193
Gm21992	0.841444	0.171479	4.15978	0.0413949	0.353193
Rrbp1	0.2486	7.63006	4.15274	0.0415671	0.353203
Prm1	2.47548	-1.19311	4.15104	0.041609	0.353203
Paqr4	0.618058	3.0168	4.15017	0.0416305	0.353203
Klc1	0.178429	6.46568	4.14937	0.0416501	0.353203
Cd93	0.945376	5.59889	4.14829	0.0416766	0.353203
Hic1	1.02165	2.38468	4.14738	0.0416989	0.353203
Hnrnph3	0.292261	5.91306	4.14554	0.0417444	0.353203
Ear6	3.11615	0.961741	4.14345	0.0417959	0.353203
Pradc1	0.407178	3.79872	4.14154	0.0418431	0.353216
Gm17296	0.298899	5.25061	4.13447	0.0420183	0.354193
Nradd	0.602498	1.36176	4.12882	0.0421587	0.354873
Pde5a	1.18051	1.39746	4.12448	0.042267	0.355525
Spred2	0.375077	3.57064	4.12332	0.042296	0.355525
Dst	0.874139	2.35737	4.12078	0.0423595	0.355808
Mroh2a	0.684192	2.72494	4.11303	0.0425539	0.356685
Sae1	0.247685	6.8059	4.1092	0.0426504	0.356991
Pcp4	1.48099	-0.941691	4.09864	0.0429178	0.35822
Cd177	2.86818	-0.783719	4.09585	0.0429887	0.35828
Ahrr	1.09592	2.28788	4.09486	0.0430139	0.35828
Bcas1	0.724099	0.405472	4.0948	0.0430153	0.35828
Vwa5a	0.580484	4.25155	4.09217	0.0430823	0.358587
Gtse1	0.767551	3.49871	4.08451	0.043278	0.359713
Orm3	0.932073	0.677249	4.0823	0.0433347	0.359932
Nap1l3	0.875333	-0.331396	4.0809	0.0433706	0.359979
Mettl15	0.406717	2.45704	4.07849	0.0434324	0.360099
Micall2	1.5377	-0.79753	4.07664	0.0434799	0.360099
Phlda1	0.617947	1.86778	4.0757	0.0435042	0.360099
Il7r	1.43674	3.07961	4.07563	0.0435062	0.360099
Gm14410	0.551763	1.5166	4.06675	0.0437352	0.361743
Nup93	0.193049	6.38495	4.06134	0.0438757	0.362401
Jazf1	1.08333	-0.648908	4.04667	0.0442586	0.364438
Cdkl2	0.575034	1.07424	4.04662	0.0442598	0.364438
Pigh	0.387766	3.18939	4.04386	0.0443323	0.364473
Slc18a2	0.960636	1.27058	4.04161	0.0443915	0.364636
Ubap2	0.249263	7.01039	4.03353	0.0446045	0.36537
Htra2	0.278454	5.94966	4.0335	0.0446052	0.36537
Ccdc64b	1.43895	-0.957408	4.03182	0.0446497	0.36537
Hdc	1.28432	1.22899	4.03017	0.0446935	0.36537
6720489N17Rik	0.369375	2.32439	4.02962	0.044708	0.36537
Rpp30	0.315108	3.90531	4.02897	0.0447253	0.36537
Supt6	0.208851	7.54723	4.02417	0.0448528	0.366149
Pmf1	0.378654	5.85873	4.02047	0.0449511	0.366368
Hn1l	0.207022	5.65817	4.01756	0.0450289	0.366368
Itga5	1.33622	2.29588	4.01738	0.0450336	0.366368
Luzp1	0.466383	3.26761	4.01481	0.0451022	0.366385
Coro1c	0.244755	6.63684	4.01378	0.0451299	0.366385
Armcx4	0.90485	1.756	4.0137	0.0451319	0.366385
Cep128	0.34168	4.39211	4.01268	0.0451592	0.366385
Rasl10a	1.23397	-0.197255	4.01026	0.0452241	0.366414
Pnkd	0.373837	4.02807	4.00169	0.0454547	0.367531
Tnnt1	1.50146	-0.478981	4.00041	0.0454891	0.367559
Lysmd2	0.824548	0.867555	3.99612	0.0456052	0.367997
Tal1	2.63105	0.445781	3.99486	0.0456394	0.368023
Nudt17	0.805386	0.968316	3.98931	0.0457899	0.368123
Syngap1	0.602199	1.29157	3.98826	0.0458183	0.368123
Fads1	0.624965	4.4481	3.98731	0.0458442	0.368123
Mlf1	1.37413	-0.866811	3.98588	0.0458832	0.368123
Reln	1.55284	2.09872	3.98557	0.0458916	0.368123
Snx22	1.13525	0.0570922	3.98194	0.0459906	0.368123
Tango2	0.333686	4.08559	3.98124	0.0460096	0.368123
Nans	0.300497	6.27017	3.98114	0.0460124	0.368123
Grhl1	0.349471	3.76696	3.98075	0.0460231	0.368123
Heatr5a	0.35493	4.83605	3.97459	0.0461917	0.368976
Mospd3	0.337716	4.9485	3.97276	0.0462419	0.369128
Timp2	1.12813	1.58942	3.96644	0.0464158	0.370081
Bmpr2	0.542297	2.87223	3.96335	0.0465012	0.370452
Mcpt8	2.60852	2.18626	3.96148	0.0465528	0.370615
Xrcc6	0.373662	6.0192	3.95753	0.0466622	0.371237
Cog4	0.232429	5.46497	3.95545	0.0467199	0.371448
Vim	0.669956	7.48238	3.95331	0.0467793	0.371449
Dek	0.217838	7.86792	3.9532	0.0467825	0.371449
Galns	0.278754	5.38501	3.94969	0.0468801	0.371926
Xrcc3	0.470017	4.37923	3.94879	0.046905	0.371926
Rbmx	0.217201	6.68478	3.94759	0.0469385	0.371943
Rltpr	0.25029	7.92739	3.94516	0.0470063	0.372232
Gm11084	1.10269	-0.544177	3.9415	0.0471086	0.372374
Tfdp2	0.29035	5.26896	3.94117	0.0471181	0.372374
Gata2	2.14304	1.43984	3.93896	0.0471798	0.372614
Tmem132e	3.06937	0.599167	3.93759	0.0472184	0.372671
Hbb-bs	4.01345	7.84694	3.92941	0.0474486	0.373744
Dynlt1a	0.621396	2.12515	3.92717	0.0475118	0.373994
mt-Nd2	0.522364	10.3056	3.92103	0.0476857	0.375115
Kctd6	0.383502	3.4421	3.91579	0.0478344	0.375385
Pask	0.589933	4.28325	3.91573	0.0478363	0.375385
Ptpla	1.57275	-0.760535	3.91538	0.0478462	0.375385
Ctdspl	1.69548	0.688811	3.91244	0.04793	0.375794
Scamp1	1.27565	1.03401	3.90632	0.0481049	0.376669
Hira	0.324922	4.38446	3.90404	0.0481702	0.376932
Muc13	2.53228	0.21029	3.90038	0.0482752	0.377187
Zfp414	0.342979	4.34933	3.90019	0.0482805	0.377187
Fut4	0.9174	1.35959	3.89839	0.0483325	0.377187
Usp49	0.457993	3.25469	3.89738	0.0483614	0.377187
Pls3	0.886512	0.501638	3.89526	0.0484225	0.377366
Rnaseh2c	0.307486	5.69468	3.89439	0.0484477	0.377366
Clec9a	1.76901	0.129214	3.88571	0.0486987	0.378668
Myo1a	0.937425	-0.264127	3.8816	0.0488181	0.378866
Katnbl1	0.290858	4.05221	3.87315	0.0490645	0.3802
Arhgef40	0.805342	2.64174	3.86837	0.0492042	0.381012
Larp1b	0.279854	4.16007	3.86139	0.0494095	0.38136
Mark4	0.260335	5.36734	3.85982	0.0494555	0.381468
Hmgb3	0.390132	4.23474	3.85702	0.0495384	0.38175
Slamf9	0.400929	4.87024	3.8543	0.0496188	0.381984
Tmem91	0.877426	0.276204	3.85267	0.0496668	0.382106
Cpa3	2.32325	0.743032	3.84779	0.0498115	0.382347
Il3ra	0.71164	4.19211	3.84728	0.0498267	0.382347
Recql	0.204401	5.50116	3.8428	0.04996	0.383123
Sapcd1	0.867615	1.32406	3.83994	0.0500453	0.38353
Armcx6	0.514042	1.55893	3.83826	0.0500955	0.383594
Vpreb1	2.07903	-0.2985	3.8375	0.0501181	0.383594
Rtn4ip1	0.259171	5.39067	3.82461	0.0505051	0.38566
Rgcc	1.213	0.427346	3.81901	0.0506741	0.38566
Mfsd10	0.362422	5.37848	3.81395	0.0508275	0.386305
Spint1	1.00685	0.0395454	3.80844	0.0509948	0.387313
Gm29666	0.639825	0.844933	3.8052	0.0510937	0.387817
Eps8	0.609896	3.34101	3.80357	0.0511435	0.387947
Setd8	0.245353	6.26012	3.80145	0.0512081	0.38819
mt-Nd5	0.378281	10.7018	3.79972	0.0512611	0.388343
Ache	1.77614	0.876139	3.79691	0.0513472	0.388748
Adk	0.293842	4.4512	3.79426	0.0514285	0.388886
Ehd2	0.638679	4.83366	3.79317	0.0514621	0.388886
Paics	0.196482	7.65825	3.7886	0.0516027	0.389396
Fbxw17	0.476905	3.39524	3.78738	0.0516404	0.389396
Sspo	0.678513	1.48903	3.78602	0.0516825	0.389396
Rapgefl1	1.48734	2.15765	3.78379	0.0517513	0.389396
Dram1	1.10079	1.52559	3.78343	0.0517624	0.389396
Rassf8	1.35504	0.142896	3.78288	0.0517795	0.389396
Il17rb	1.42218	-0.89957	3.78245	0.0517929	0.389396
Lppr3	0.42003	3.91866	3.77876	0.0519072	0.389763
Pigr	0.385507	4.1791	3.77333	0.052076	0.390456
Adrbk2	0.735918	3.76154	3.77204	0.052116	0.390456
Zfp808	0.40099	2.51284	3.76829	0.052233	0.390729
Zdhhc14	0.512941	3.62582	3.7639	0.0523704	0.391511
Zcrb1	0.244806	5.47511	3.76044	0.0524788	0.391676
Rilpl1	0.832421	1.53764	3.75988	0.0524964	0.391676
Galk1	0.267574	5.44264	3.75899	0.0525242	0.391676
Socs1	0.938312	2.96517	3.75648	0.0526031	0.392018
Tspo2	2.52153	0.610086	3.75307	0.0527108	0.392394
Tead2	0.616135	2.06616	3.75278	0.0527197	0.392394
Fn1	2.47805	1.96437	3.75174	0.0527525	0.392394
H2afx	0.564858	6.28185	3.7496	0.0528202	0.392652
Brms1l	0.275198	4.45434	3.74654	0.052917	0.392881
Ttc7b	0.292229	4.18691	3.743	0.0530292	0.393223
Slc20a1	0.271749	5.9549	3.73537	0.0532719	0.394777
Stk11	0.204089	7.7456	3.73407	0.0533133	0.394837
Phka2	0.23607	5.25363	3.7274	0.0535265	0.395923
Dscaml1	1.16409	0.0656359	3.72528	0.0535947	0.396181
Klhl25	0.297882	4.79468	3.71485	0.0539305	0.398416
Csrp1	0.392127	6.13495	3.71045	0.0540728	0.398972
Ttk	0.978168	3.12616	3.70274	0.0543234	0.400215
Ms4a2	2.48894	0.230781	3.69049	0.0547235	0.401312
Wsb2	0.262646	5.3102	3.6898	0.0547463	0.401312
Myzap	0.47231	2.80455	3.68659	0.0548518	0.401728
Tnfrsf19	1.13442	1.23577	3.68256	0.0549842	0.402451
Arhgef10	0.813006	1.64962	3.67673	0.055177	0.403614
C1qc	1.45183	1.02282	3.67174	0.0553424	0.40395
Tigd3	0.559084	1.60909	3.67155	0.0553486	0.40395
Smyd2	0.689954	2.81303	3.67022	0.0553929	0.40395
Msh3	0.294915	5.12972	3.66828	0.0554574	0.404113
Sptbn4	0.660447	0.528769	3.66546	0.0555512	0.404113
Zfpm1	0.378614	6.94621	3.65454	0.0559167	0.405589
Rbbp7	0.202348	7.91455	3.6543	0.0559245	0.405589
Tnfaip8l1	0.748968	0.584741	3.64532	0.056227	0.407319
Ccdc64	0.51121	2.63653	3.6447	0.0562481	0.407319
Cdc123	0.254535	6.02112	3.64132	0.0563623	0.407319
Rai14	1.4087	-0.685011	3.64102	0.0563724	0.407319
Atp10a	0.698882	3.08105	3.64074	0.0563818	0.407319
Hlx	0.763773	2.27371	3.64052	0.0563893	0.407319
Hmgn2	0.314725	7.93574	3.64012	0.0564028	0.407319
Zfp704	1.07755	1.11328	3.62902	0.0567801	0.409051
Acap3	0.30414	4.5874	3.62182	0.0570266	0.410329
Polr2j	0.305499	4.87433	3.61992	0.0570916	0.410549
Golgb1	0.264141	6.38992	3.61649	0.0572096	0.411149
Cdc25c	1.0908	1.83329	3.61175	0.0573727	0.411575
Abcb4	0.406952	3.25848	3.60762	0.0575153	0.411614
Nhsl2	1.63069	0.410263	3.598	0.0578493	0.41306
Myd88	0.220731	5.75094	3.59776	0.0578576	0.41306
Raet1d	0.801362	0.375319	3.59321	0.0580159	0.413531
Stil	0.865068	3.68456	3.59287	0.0580278	0.413531
Tab1	0.304827	4.90099	3.58969	0.0581392	0.413745
Xrcc2	0.319377	3.62051	3.58903	0.0581623	0.413745
Pqlc3	0.320252	4.78566	3.5871	0.0582297	0.413977
Mcmdc2	1.44339	-0.747055	3.5796	0.0584933	0.415107
Alox15	2.54544	1.38827	3.56691	0.0589419	0.417543
Uhrf1	0.466287	7.74208	3.55355	0.0594183	0.419839
2021-03-08	0.803301	2.44561	3.55287	0.0594425	0.419839
Mtap7d3	0.726322	-0.067189	3.55073	0.0595192	0.419882
Ino80e	0.216178	5.90722	3.54599	0.0596897	0.420102
Prdm1	0.547208	2.64107	3.54589	0.0596931	0.420102
Shcbp1	0.866386	3.55631	3.54445	0.059745	0.420102
E2f3	0.27683	4.89023	3.54299	0.0597976	0.420102
Ascc2	0.159424	6.2145	3.53546	0.0600698	0.421765
Hbs1l	0.166152	5.8886	3.53273	0.0601685	0.42196
Oxa1l	0.297865	6.9762	3.53052	0.0602491	0.422276
Pla2g4a	1.12531	0.808488	3.52272	0.0605331	0.423556
Nudt1	0.379196	3.98223	3.52251	0.0605409	0.423556
Lad1	0.864915	2.83387	3.5216	0.0605741	0.423556
Gtf2ird2	0.218705	5.59833	3.52017	0.0606263	0.423672
Mtus1	1.98323	0.300624	3.51369	0.0608638	0.424833
Hist1h2bk	1.17315	-0.208499	3.50883	0.0610424	0.425802
Rnf126	0.243457	6.30528	3.50762	0.0610873	0.425802
Rtn4	0.189162	6.8646	3.507	0.0611101	0.425802
Plin2	0.830411	3.92651	3.50594	0.0611493	0.425825
Dtl	0.544011	5.85707	3.50262	0.0612717	0.42593
Spon1	0.835598	0.0962507	3.49956	0.061385	0.426468
Rundc3a	0.621022	1.45236	3.4941	0.061588	0.427379
Apobr	1.10213	1.77415	3.49008	0.0617377	0.427652
Rnaseh2a	0.27571	5.40076	3.48946	0.0617607	0.427652
Tmem150b	1.37598	-0.784394	3.48918	0.0617711	0.427652
Mycn	1.56401	-1.15871	3.4824	0.0620247	0.428908
Parpbp	0.808518	2.14112	3.48135	0.0620643	0.428932
Mks1	0.245208	4.65284	3.47605	0.0622633	0.429808
Met	1.29735	0.590916	3.47204	0.0624144	0.43046
Plscr3	0.372789	4.08662	3.46953	0.0625091	0.430522
Hbb-bt	3.09567	5.14597	3.46946	0.0625115	0.430522
Ogdh	0.144084	8.03364	3.46836	0.0625534	0.430562
Igf2bp3	1.08032	2.89774	3.45647	0.0630047	0.431802
Ap1ar	0.2046	6.14637	3.45504	0.0630591	0.431802
A930004D18Rik	0.766552	-0.658492	3.45501	0.0630604	0.431802
4930579G24Rik	0.427687	3.0625	3.4495	0.0632708	0.432142
Tmem159	0.752334	0.611468	3.44896	0.0632917	0.432142
Txn1	0.329997	7.13193	3.44254	0.063538	0.432759
Mllt4	0.924186	0.794378	3.44236	0.0635449	0.432759
Cadm3	0.832038	0.114939	3.4358	0.0637976	0.434034
Rangap1	0.212585	7.16427	3.43511	0.0638242	0.434034
Ccdc36	0.803449	-0.656247	3.43208	0.0639415	0.434187
Uxs1	0.236968	4.23739	3.43076	0.0639927	0.434187
D630045J12Rik	0.685222	0.417602	3.42828	0.0640888	0.434591
Dusp23	0.4058	2.16393	3.42721	0.0641302	0.434624
St6galnac6	0.267979	4.5814	3.41814	0.0644835	0.436769
Galnt7	0.241386	4.58482	3.41214	0.0647185	0.437574
Parvb	1.21347	1.18401	3.40875	0.0648517	0.437574
Dalrd3	0.287496	6.65706	3.40854	0.0648598	0.437574
Stk19	0.254627	5.32751	3.40593	0.0649625	0.437574
Dck	0.317483	6.07809	3.40585	0.0649656	0.437574
Cacnb1	0.465748	3.18353	3.40505	0.0649971	0.437574
Scfd2	0.272064	3.56918	3.40505	0.0649971	0.437574
Nlrp3	1.55167	1.32192	3.4048	0.065007	0.437574
Tifab	1.39602	2.93148	3.40241	0.0651013	0.437961
Hba-a2	3.36804	4.17332	3.39835	0.0652619	0.438191
Actr3b	0.398035	2.95534	3.39524	0.0653848	0.438191
Ece1	0.231878	5.17439	3.39417	0.0654274	0.438191
Dmpk	1.2205	0.454499	3.39413	0.0654288	0.438191
Spef1	0.555503	1.53339	3.39309	0.06547	0.438191
Ezh2	0.323239	6.89068	3.38989	0.0655975	0.438191
Sez6l2	0.401915	2.23401	3.38873	0.0656436	0.438191
Gfi1b	1.88887	-0.0619309	3.38847	0.0656537	0.438191
Hist1h1e	0.939138	-0.624635	3.38449	0.0658127	0.438776
Celsr1	0.700704	1.60319	3.38266	0.0658858	0.438915
Slit1	1.26768	-0.489724	3.38156	0.0659295	0.438915
Mrps36	0.307861	4.3281	3.38119	0.0659443	0.438915
Ap3s1	0.398519	4.22454	3.37693	0.0661153	0.439428
2610318N02Rik	0.571292	2.9435	3.37645	0.0661346	0.439428
Clec10a	1.40672	1.23832	3.37245	0.066295	0.439773
Prkar2b	0.974165	1.83234	3.36861	0.06645	0.440555
Gpr56	1.68497	2.92953	3.36766	0.0664881	0.440562
Sgce	1.11683	-0.561446	3.36502	0.0665948	0.440776
Ssrp1	0.166639	8.61407	3.35785	0.0668854	0.442209
B3gnt9	0.816095	0.158516	3.35466	0.0670151	0.442821
Fbxo48	0.4319	2.98974	3.33908	0.0676524	0.446041
Ipp	0.275676	3.97986	3.3371	0.0677341	0.446303
Clec12a	1.04314	3.39716	3.33526	0.0678098	0.446303
Ikbke	0.362103	5.15196	3.33447	0.0678422	0.446303
Kif5a	1.12864	-0.286729	3.32893	0.0680712	0.447314
Idh2	0.364819	5.12529	3.32794	0.0681123	0.447337
Dclre1a	0.387421	2.64115	3.32362	0.0682914	0.447771
Agfg2	0.264671	4.83469	3.31842	0.0685075	0.448694
Mbnl3	0.337827	4.23148	3.30951	0.0688801	0.450143
Hba-a1	3.66086	7.17946	3.30775	0.068954	0.450366
Cnih4	0.231957	4.8211	3.30396	0.0691131	0.450922
1110032F04Rik	0.90646	-0.422037	3.29921	0.0693133	0.451115
Nsg2	0.874693	0.294832	3.29754	0.0693836	0.451115
Sephs1	0.198524	5.78958	3.29728	0.0693947	0.451115
Tstd1	0.536165	2.63117	3.29515	0.0694847	0.451115
Cd300a	1.34313	2.85961	3.29498	0.0694919	0.451115
Tmem165	0.207397	5.67328	3.29489	0.0694958	0.451115
Ppp2r2d	0.22749	5.49601	3.29353	0.0695534	0.451115
Gabarapl1	0.332923	4.15088	3.29253	0.0695957	0.451115
2021-09-11	0.203065	8.27952	3.29216	0.0696114	0.451115
Ict1	0.301589	4.79147	3.2904	0.0696861	0.451196
Rbm10	0.181436	7.08515	3.28949	0.0697246	0.451199
Cltb	0.346898	4.34139	3.28741	0.0698132	0.451396
Lrrc8b	0.338525	3.63615	3.2865	0.069852	0.451396
Gm17334	0.660784	0.902893	3.2861	0.0698689	0.451396
Lpcat3	0.229871	5.57991	3.28504	0.0699141	0.451408
Bcl7c	0.286805	5.74677	3.28427	0.0699466	0.451408
Apol11b	3.16378	-0.192583	3.28164	0.0700588	0.451792
Tgfbr3	1.77486	-0.645271	3.27661	0.0702739	0.452538
Cenpt	0.381128	4.66198	3.27337	0.070413	0.453189
Mov10	0.467881	4.89013	3.27159	0.0704894	0.453209
Cdc25a	0.238231	5.53682	3.27152	0.0704925	0.453209
Aifm1	0.224154	5.63978	3.27051	0.0705356	0.453242
Rccd1	0.255402	5.15257	3.2686	0.070618	0.453289
Ciapin1	0.205934	5.64661	3.26644	0.070711	0.453289
Sowahc	0.402492	3.86838	3.26604	0.0707281	0.453289
Dxo	0.33739	5.452	3.26592	0.0707335	0.453289
Rtn4rl1	0.737488	0.498462	3.26281	0.0708674	0.453538
Fhod1	0.239899	5.8839	3.26149	0.0709249	0.453538
Mtch1	0.265823	6.59129	3.25973	0.0710009	0.453682
Alas2	3.06861	4.20194	3.25715	0.0711127	0.454007
Vamp8	0.34705	5.89765	3.24879	0.071476	0.455266
Efna2	1.21433	-0.320452	3.24822	0.0715013	0.455266
Prodh	0.63395	2.37892	3.24672	0.0715665	0.455437
Mrpl51	0.244287	5.40577	3.24524	0.0716313	0.455606
Thbs1	1.78578	4.26949	3.24288	0.0717345	0.456018
Gm14548	0.610926	1.52656	3.23813	0.0719429	0.457099
Alpk1	0.64118	2.46094	3.23437	0.0721081	0.457608
Lhx2	0.861066	-0.609779	3.23368	0.0721385	0.457608
U2af1	0.193505	6.67953	3.2266	0.0724508	0.458665
F5	1.06528	1.79721	3.22031	0.0727298	0.460132
Ilkap	0.200111	6.45624	3.217	0.0728772	0.460575
Fbxl19	0.259968	5.77535	3.21518	0.0729582	0.460597
Dhrs7b	0.259612	4.33606	3.20117	0.0735857	0.46323
Slc16a4	0.729298	0.975938	3.19715	0.0737669	0.463531
Nup43	0.247065	4.29751	3.19573	0.073831	0.463611
Ryr1	0.35895	4.18547	3.19499	0.0738644	0.463611
Dmd	0.573092	1.29632	3.19355	0.0739294	0.463774
Tmcc2	2.6793	5.16009	3.18868	0.0741497	0.464911
Rxra	0.613334	4.55503	3.1863	0.0742579	0.46508
Sap30	0.493215	3.51441	3.18347	0.0743865	0.46508
Rilpl2	0.314423	8.17898	3.18341	0.0743894	0.46508
Hnrnpab	0.221329	8.69127	3.18243	0.0744338	0.46508
2210404O09Rik	0.414763	1.94124	3.18207	0.0744503	0.46508
Pon3	0.640237	1.69788	3.1808	0.0745081	0.465197
Ncf1	0.196831	9.11748	3.17686	0.0746883	0.46576
Srp54b	0.255534	4.1103	3.17625	0.0747159	0.46576
Myl6b	0.525385	1.55559	3.17392	0.0748225	0.465936
Ecm1	0.477517	2.72208	3.17042	0.074983	0.46632
Ccdc34	0.426014	3.86177	3.16979	0.0750122	0.46632
Laptm4b	0.622159	2.10495	3.16098	0.0754177	0.467796
Hivep3	0.487395	7.13849	3.16095	0.0754192	0.467796
Exosc7	0.241994	5.3838	3.16082	0.0754251	0.467796
Cebpa	1.38272	2.47652	3.16059	0.0754358	0.467796
Zc3h18	0.1443	7.24777	3.15328	0.0757746	0.469408
Ak3	0.235315	5.20907	3.15037	0.07591	0.469757
Angptl6	0.5603	0.843744	3.14474	0.0761722	0.47089
Gpr141	1.71869	0.74193	3.14022	0.0763835	0.471814
Stag3	0.895451	1.8297	3.1381	0.076483	0.47183
Dctpp1	0.369148	4.92498	3.13389	0.0766805	0.472444
Islr2	1.71642	-0.467848	3.13367	0.0766908	0.472444
Lxn	0.632689	2.41152	3.13344	0.0767016	0.472444
Ddah2	0.705475	2.706	3.13085	0.0768238	0.472577
Arhgap21	0.266408	5.08163	3.13045	0.0768424	0.472577
1700061G19Rik	0.85599	0.186676	3.12479	0.0771097	0.473976
Tpmt	0.589118	0.768915	3.12156	0.0772629	0.474179
Cd34	1.87832	0.286703	3.12127	0.0772764	0.474179
Uchl1	1.38529	2.03185	3.121	0.0772895	0.474179
Spry4	1.01117	-0.802332	3.12073	0.0773023	0.474179
Gpam	0.513003	4.32671	3.11927	0.0773716	0.474223
Ppil1	0.271815	5.99363	3.1189	0.0773891	0.474223
Dnaaf2	0.473224	1.82248	3.11533	0.0775589	0.474786
Suv420h2	0.341231	6.27155	3.11421	0.0776121	0.474855
Nsmf	0.27475	6.43068	3.1125	0.0776934	0.47494
Pycard	0.360908	4.73298	3.10561	0.0780228	0.475994
Cdc7	0.234541	5.33949	3.10274	0.0781608	0.475994
Mmp9	2.57969	0.386198	3.10194	0.078199	0.475994
Iigp1	2.31373	0.313473	3.10155	0.0782178	0.475994
Maged2	0.591691	1.22337	3.10081	0.0782534	0.475994
Cntrl	0.223614	7.59411	3.10029	0.0782785	0.475994
Hspa4l	0.260027	4.65219	3.09791	0.0783929	0.476141
Klra2	2.55515	-1.09045	3.0977	0.0784028	0.476141
Nudt4	0.253808	5.40723	3.09576	0.0784963	0.476141
Tmem29	0.338784	3.04618	3.09337	0.0786118	0.476141
Sestd1	1.00141	1.15206	3.09218	0.0786695	0.476141
Gpaa1	0.265226	5.70991	3.09212	0.0786722	0.476141
Ocln	0.866754	-0.917677	3.09148	0.0787031	0.476141
Lrtm2	0.66323	0.965654	3.08517	0.0790092	0.477508
Tmem205	1.24122	0.105056	3.08372	0.0790794	0.477689
Gga1	0.533367	6.42081	3.08189	0.0791687	0.477986
2210016F16Rik	0.366084	5.44962	3.08016	0.0792526	0.47825
Wnt6	1.06085	-0.794606	3.07744	0.0793854	0.478565
Uqcr10	0.274609	6.13505	3.07744	0.0793854	0.478565
Enpp6	0.87597	-0.055873	3.07532	0.0794889	0.478947
A530040E14RIK	0.723337	-0.121411	3.0701	0.0797445	0.480001
Zak	0.328256	3.36092	3.06774	0.0798605	0.480213
Thbd	1.14887	1.74214	3.06528	0.0799815	0.480326
Rem2	0.808726	0.543649	3.0648	0.0800051	0.480326
Ifi27	0.546739	5.42583	3.06407	0.0800409	0.480326
Cers6	0.406982	4.64205	3.06288	0.0800997	0.480437
C1qtnf6	0.861061	-0.175955	3.06017	0.0802331	0.480752
Tmprss3	2.15782	-0.982877	3.05607	0.0804358	0.481481
Kcnc3	0.310515	4.4369	3.05517	0.0804807	0.481508
Dnah14	0.723269	0.780694	3.05296	0.0805901	0.481665
Dvl3	0.237279	5.98389	3.04813	0.0808303	0.482628
Pitpnm2	0.258632	6.59668	3.04528	0.0809723	0.482835
Hnf1b	0.819421	1.73109	3.04499	0.0809867	0.482835
Pfkfb1	0.38729	2.17987	3.03859	0.0813063	0.484255
Tlr8	1.42619	0.278652	3.0371	0.0813813	0.484441
Ccp110	0.27723	5.04835	3.03217	0.081629	0.484994
Fancb	0.356021	2.96553	3.02978	0.0817493	0.484994
Oasl2	1.83369	1.69118	3.02721	0.0818789	0.484994
Padi4	2.07166	0.692383	3.02171	0.0821568	0.486156
Slc35d3	1.68703	0.162718	3.014	0.0825482	0.48741
Nin	0.295822	6.6571	3.01277	0.0826112	0.48741
Cyp11a1	1.58376	0.833031	3.01201	0.0826497	0.48741
Retnlg	2.34368	0.702361	3.01078	0.0827122	0.487502
Itgb3bp	0.341235	3.29226	3.00768	0.0828707	0.487826
Lgalsl	0.532865	0.854629	3.00549	0.0829829	0.487826
Plxnc1	0.241477	7.37038	3.00448	0.0830346	0.487826
Tex2	0.41375	4.36001	3.00416	0.0830509	0.487826
Mad1l1	0.292131	4.63327	3.00245	0.0831388	0.487826
Rbm43	0.312711	5.17609	3.00205	0.083159	0.487826
Eef2k	0.361513	4.75648	3.00167	0.0831788	0.487826
Dcakd	0.353357	4.52405	3.00148	0.0831886	0.487826
Ikzf2	1.59324	0.038882	3.0009	0.0832184	0.487826
Ung	0.237665	6.16337	2.99726	0.0834052	0.488667
Uqcrq	0.284394	6.20249	2.99585	0.083478	0.488667
Zfp513	0.264405	6.08451	2.99459	0.0835429	0.488765
Stau2	0.328764	3.19039	2.99245	0.0836534	0.488938
Cwc27	0.257238	4.57779	2.99156	0.0836994	0.488938
Arhgap28	1.02365	-0.223206	2.99084	0.0837369	0.488938
Gstt2	0.41405	4.5895	2.98764	0.0839026	0.489575
Dynll2	0.1819	6.63299	2.98627	0.0839736	0.489599
Tmem107	0.475787	2.05408	2.9804	0.0842786	0.490416
Tubb2a	0.386426	4.2772	2.97872	0.0843658	0.490443
Fam53b	0.342459	7.43499	2.97303	0.084663	0.491451
Malsu1	0.284214	3.94871	2.97097	0.0847712	0.491598
Ank1	1.21678	0.342158	2.9672	0.0849686	0.492265
Tipin	0.261868	5.45988	2.96681	0.0849891	0.492265
Hsp90aa1	0.171998	9.15345	2.96627	0.0850177	0.492265
Rinl	0.270667	5.15921	2.96246	0.085218	0.492537
Agbl1	1.17659	-0.795938	2.96158	0.0852644	0.492537
Tet2	0.385486	6.14037	2.9553	0.0855966	0.493977
Npr1	1.06898	0.0818975	2.95366	0.0856832	0.494039
Tfpt	0.300267	4.46807	2.95353	0.0856904	0.494039
Phactr2	0.622657	2.71384	2.95217	0.0857626	0.494083
Stxbp1	0.419934	3.02139	2.94579	0.0861015	0.494758
Selplg	0.334205	6.57926	2.94539	0.0861229	0.494758
D2Wsu81e	0.229305	5.07059	2.94435	0.0861785	0.494758
Dpp4	0.299392	6.65707	2.94385	0.086205	0.494758
Abi2	0.338092	3.44502	2.93913	0.0864575	0.495102
F2r	1.99808	0.386562	2.93901	0.0864635	0.495102
Ly6c2	1.83396	4.74465	2.93775	0.0865314	0.495102
Pin1	0.26304	5.82532	2.93713	0.0865646	0.495102
Psrc1	1.27666	1.78374	2.93602	0.0866237	0.495102
Ccdc42b	0.878129	-0.674358	2.93546	0.0866539	0.495102
Clec4g	1.33864	-0.859114	2.93197	0.0868417	0.495393
Rassf6	0.450617	2.08832	2.92602	0.0871624	0.496335
Casc1	0.610707	0.966281	2.92532	0.0872002	0.496335
Mef2a	0.203058	6.78639	2.92503	0.0872154	0.496335
Dbndd2	0.887371	-0.240705	2.92305	0.0873226	0.496707
Rps6ka2	0.351347	2.48287	2.92102	0.0874324	0.496977
Sephs2	0.285673	5.33193	2.92063	0.0874535	0.496977
Celsr3	1.15336	-0.545027	2.91895	0.0875447	0.497257
Cdo1	0.626296	0.400872	2.91704	0.0876482	0.497608
Ccl6	1.7348	2.62915	2.9137	0.0878302	0.498165
Desi1	0.241432	5.51663	2.91088	0.0879837	0.498798
Smpd4	0.204911	6.12185	2.91006	0.0880284	0.498813
Pfkm	0.393842	2.71992	2.90906	0.0880832	0.498855
Eif4enif1	0.146251	7.26186	2.90839	0.0881196	0.498855
Arhgap22	0.982936	-0.292513	2.9048	0.0883162	0.49935
Src	1.02761	0.95013	2.90066	0.0885435	0.499597
Cblc	0.759268	-0.307601	2.90063	0.0885447	0.499597
Clpb	0.238485	4.82801	2.89947	0.0886085	0.499605
Sepn1	0.744888	2.19006	2.89728	0.0887291	0.499605
Rpf1	0.212065	5.56344	2.89679	0.0887561	0.499605
Hmga1	0.264143	7.68849	2.89478	0.0888667	0.499991
Commd6	0.224398	4.94586	2.88974	0.0891453	0.501084
Smc5	0.209534	6.05257	2.88557	0.0893764	0.501909
Hes6	0.286904	5.5493	2.88128	0.0896149	0.502299
Pcgf2	0.579759	1.0462	2.87524	0.0899513	0.50371
Tas1r3	0.514112	1.17766	2.87427	0.0900059	0.503779
2310036O22Rik	0.237086	7.18444	2.86815	0.0903488	0.504449
Dsel	0.534975	1.30316	2.86661	0.0904352	0.504449
Wbp5	0.312844	5.1799	2.86577	0.0904826	0.504449
Eqtn	0.862617	-0.576599	2.86438	0.0905604	0.504449
Wnk4	0.844594	-0.176799	2.86416	0.0905727	0.504449
Nup88	0.141375	6.60236	2.86376	0.0905956	0.504449
Slc25a13	0.597344	2.97478	2.86315	0.0906297	0.504449
Pilrb2	1.8108	-0.254632	2.86315	0.0906301	0.504449
Emb	1.03677	3.28077	2.86307	0.0906346	0.504449
Galm	0.943974	-0.564306	2.86205	0.0906918	0.504531
Adcy5	0.935118	-0.575017	2.85476	0.0911038	0.505852
Ebi3	0.403897	4.02121	2.85424	0.0911335	0.505852
Helb	0.176812	6.01273	2.8538	0.0911581	0.505852
Clec4a2	1.19188	1.27613	2.85362	0.0911684	0.505852
Cyp4f16	0.52476	2.71828	2.85201	0.0912596	0.505852
Zkscan3	0.250432	6.44106	2.85184	0.0912692	0.505852
Ubtd2	0.431771	2.35185	2.85061	0.0913395	0.505852
Ston2	0.858239	0.907851	2.84993	0.091378	0.505852
Pmp22	1.16126	0.47014	2.84955	0.0913995	0.505852
Stip1	0.212244	7.6613	2.84694	0.0915478	0.505958
Akip1	0.352336	3.61398	2.84511	0.0916523	0.505958
Cdca7l	0.288631	4.30932	2.84454	0.0916849	0.505958
Haus1	0.285963	4.11759	2.84403	0.0917139	0.505958
Nxn	0.302415	3.61265	2.84223	0.0918165	0.506055
Tmem86b	0.402172	3.61721	2.83714	0.0921082	0.507192
Rbpj	0.237672	6.92877	2.83367	0.092307	0.507488
Psd	0.198045	5.8562	2.83345	0.0923198	0.507488
2010111I01Rik	0.323941	4.20626	2.8316	0.0924262	0.507488
4930402H24Rik	0.255368	4.0823	2.82817	0.092624	0.507488
Dlst	0.141937	7.20855	2.82714	0.0926833	0.507488
Hist1h3f	0.82881	-0.576119	2.82657	0.0927162	0.507488
Fes	0.592862	4.63302	2.82632	0.0927307	0.507488
Selenbp1	0.495915	2.3727	2.82582	0.0927592	0.507488
Pak6	0.874412	-0.491034	2.8196	0.0931197	0.508717
Mlf2	0.23045	6.95832	2.81955	0.0931223	0.508717
Mb21d1	0.476138	1.93515	2.81486	0.0933949	0.509045
Tmtc4	0.265355	4.14806	2.81324	0.0934893	0.509045
Atrnl1	0.4036	3.39179	2.80893	0.0937409	0.509914
Anapc2	0.164331	7.07437	2.80826	0.0937802	0.509914
Ints7	0.204842	7.26349	2.8021	0.0941409	0.511518
Kif14	1.05697	2.96863	2.80036	0.0942432	0.511606
Trpc2	0.693818	0.120946	2.79644	0.0944738	0.511759
Stk39	0.902705	1.14276	2.79535	0.0945379	0.511759
Cebpzos	0.48183	2.27577	2.79412	0.0946106	0.511759
Umps	0.22109	5.83852	2.78819	0.0949614	0.512464
Cdkn3	1.255	1.1736	2.78403	0.0952086	0.513332
Rpa1	0.190188	7.62682	2.78173	0.0953452	0.513423
Trim28	0.144389	8.52045	2.78118	0.0953777	0.513423
Cd300c	1.84106	0.254164	2.77674	0.0956425	0.513691
Nid1	0.467923	4.42479	2.77614	0.0956786	0.513691
Il1r1	0.574257	-0.0510989	2.77479	0.0957589	0.513691
Phf5a	0.236976	5.97074	2.77456	0.095773	0.513691
Fancg	0.212728	5.50343	2.77268	0.0958857	0.513691
Ccdc57	0.481746	1.53952	2.77064	0.0960076	0.513691
Nmral1	0.479439	4.50385	2.77063	0.0960084	0.513691
Arl11	1.26782	0.487396	2.76969	0.0960648	0.513757
Tiam1	0.901954	2.62984	2.76524	0.0963322	0.514561
Fam131a	0.814612	-0.349845	2.76485	0.0963557	0.514561
Dzip3	0.23938	4.80933	2.76354	0.0964344	0.514576
Tex30	0.265979	4.19386	2.76237	0.0965049	0.514711
Marcksl1	0.251096	7.63394	2.76041	0.0966233	0.514891
Cttn	1.48261	-0.334275	2.75593	0.0968944	0.516017
Plekhn1	0.183704	6.27678	2.75549	0.0969213	0.516017
Tmem65	0.27058	3.74064	2.75471	0.0969682	0.516036
Ptdss2	0.23511	4.16446	2.75119	0.0971823	0.516291
Tmem220	0.671902	0.371647	2.75115	0.0971848	0.516291
Sema3b	0.714613	0.160336	2.75114	0.0971849	0.516291
Bcor	0.19275	7.2473	2.74963	0.0972772	0.516291
Sass6	0.308277	3.59456	2.74935	0.0972942	0.516291
Mllt11	0.226405	4.37817	2.74892	0.09732	0.516291
Glod4	0.19035	5.33719	2.74631	0.0974794	0.516774
Akr1e1	0.504579	2.41954	2.746	0.097498	0.516774
Nr1h3	0.901881	2.00938	2.73941	0.0979008	0.517755
Dcun1d2	0.227545	4.53172	2.73519	0.0981596	0.51849
Phlpp2	0.248609	5.6902	2.73502	0.0981705	0.51849
Cox6b2	1.02193	0.924324	2.73384	0.098243	0.518643
Cpsf3l	0.203311	5.63248	2.73201	0.0983555	0.51894
Ear1	2.10614	0.998136	2.73151	0.0983865	0.51894
Il12a	0.385633	4.14767	2.72704	0.0986618	0.519931
Lst1	1.03138	1.98051	2.72483	0.0987985	0.520285
Wdfy3	1.01358	1.88902	2.72454	0.0988165	0.520285
Cep76	0.275825	3.65674	2.72193	0.0989781	0.520841
Dars2	0.238484	4.76005	2.7211	0.09903	0.520841
Lrrc58	0.254536	5.78781	2.72072	0.0990534	0.520841
Vdac1	0.158245	7.07948	2.71771	0.0992405	0.520977
Gm21762	1.87665	-0.384921	2.71742	0.0992585	0.520977
Alg8	0.227225	4.69218	2.71705	0.0992811	0.520977
Rarg	0.705776	1.74408	2.71665	0.0993063	0.520977
Cpd	0.454935	4.87629	2.71526	0.0993926	0.520977
Samd14	1.36031	0.321473	2.71468	0.099429	0.520977
Rnf150	0.446306	3.28118	2.71319	0.0995219	0.520977
Slc25a42	0.412324	3.54527	2.71259	0.0995593	0.520977
Trappc2l	0.276784	4.77888	2.71116	0.0996488	0.520977
Espn	0.895301	-0.363346	2.71038	0.0996972	0.521001
Casp8	0.199143	6.48832	2.70553	0.100001	0.522359
Fxr2	0.148906	6.88569	2.70453	0.100064	0.522456
Mgst2	0.816136	4.18813	2.70287	0.100168	0.522771
Wiz	0.189699	6.52251	2.70082	0.100297	0.522919
Pcgf5	0.262785	5.80011	2.69767	0.100495	0.523419
Pvrl1	0.364623	4.69828	2.6944	0.100701	0.524175
Hist1h2bg	0.892256	0.107684	2.69062	0.100941	0.524963
Clec5a	1.64766	0.579067	2.68926	0.101027	0.52518
Pdzd2	0.567876	3.40335	2.68783	0.101118	0.525348
Rtel1	0.182881	6.42385	2.68434	0.101339	0.525352
1700021F05Rik	0.368221	3.47397	2.68394	0.101364	0.525352
Rmdn3	0.224109	4.5535	2.68309	0.101419	0.52538
Ssbp2	0.350014	3.53685	2.68183	0.101499	0.525568
Adam15	0.561794	3.01813	2.68057	0.101579	0.525755
Tm6sf2	0.719627	0.419939	2.67631	0.101851	0.526223
Tcf4	0.238909	8.35928	2.67575	0.101887	0.526223
Ltbp4	1.03835	-0.0124249	2.67335	0.102041	0.526638
Siglech	1.30633	3.19038	2.66852	0.102351	0.527682
Pfkfb3	0.338714	6.64677	2.66702	0.102448	0.527953
Nsfl1c	0.152562	6.64315	2.66489	0.102585	0.52843
Chek1	0.316912	4.62823	2.66361	0.102667	0.528626
Nphp1	0.409028	1.75765	2.66091	0.102842	0.529068
Cdkl5	0.318744	3.16582	2.65994	0.102905	0.529161
1810046K07Rik	0.707509	1.25645	2.65515	0.103215	0.529798
Rcn3	0.39098	3.10798	2.65494	0.103229	0.529798
Setdb1	0.165368	6.54555	2.65466	0.103247	0.529798
Tbcc	0.262128	4.62036	2.65459	0.103251	0.529798
Fras1	1.6984	-0.779725	2.65269	0.103375	0.530115
Gtf2b	0.233216	5.05376	2.65158	0.103447	0.530115
Snrnp70	0.182292	9.00622	2.64876	0.103631	0.530495
Ubash3a	1.19248	-0.616217	2.64219	0.10406	0.531085
Trim46	0.454174	1.79549	2.63959	0.104231	0.531085
Mettl10	0.236069	3.7649	2.63867	0.104291	0.531085
Exosc8	0.17942	6.16425	2.63823	0.10432	0.531085
Brd8	0.177464	7.27276	2.63614	0.104457	0.531085
Crls1	0.21105	4.41244	2.6359	0.104473	0.531085
Nfu1	0.200363	5.6047	2.63368	0.104619	0.531085
Vps26b	0.304254	3.98658	2.63355	0.104628	0.531085
Ppm1g	0.193545	7.66206	2.62858	0.104956	0.531761
Igsf9	0.304019	5.93764	2.62377	0.105274	0.532822
Lrrc45	0.204863	6.03237	2.61913	0.105583	0.534025
Stk3	0.426448	2.99342	2.61884	0.105602	0.534025
Anp32a	0.227403	8.0824	2.61613	0.105782	0.534709
Zfp934	0.316543	3.68602	2.61485	0.105867	0.534913
Inpp1	0.208364	5.45782	2.61104	0.106122	0.535468
Lipc	0.904807	-0.263212	2.61029	0.106172	0.535468
Gng12	0.267941	4.33222	2.60939	0.106233	0.535468
Cd4	1.40139	1.31282	2.6085	0.106292	0.535468
Zc3h7b	0.153869	6.71188	2.60722	0.106378	0.535674
Emp1	1.55073	0.0866508	2.60323	0.106646	0.53654
Adcy9	0.747109	0.932802	2.60244	0.106699	0.53654
Ccdc82	0.204362	6.42661	2.6003	0.106844	0.53654
Zfp11	0.438735	1.98212	2.59936	0.106907	0.53654
Apobec1	0.427467	5.52063	2.59908	0.106926	0.53654
Tfdp1	0.362086	6.97619	2.59891	0.106937	0.53654
Zfp947	0.645845	-0.0693205	2.59863	0.106956	0.53654
Etaa1	0.257805	4.88183	2.59465	0.107225	0.537437
Maged1	0.399795	2.04727	2.59212	0.107396	0.538067
Ldlrad3	0.480071	2.41179	2.59101	0.107472	0.538218
Gm12216	0.4856	1.94598	2.59013	0.107532	0.538293
Stx11	0.234796	4.68686	2.58919	0.107596	0.538385
Lrrc10b	2.91181	-0.970272	2.58427	0.10793	0.539486
Cep192	0.227075	6.28435	2.58323	0.108001	0.539507
Rab32	0.739798	3.20739	2.58136	0.108128	0.539899
Tfpi	0.58592	1.72239	2.57656	0.108457	0.540649
Vcpkmt	0.250407	4.35075	2.57311	0.108694	0.541346
Vps25	0.749635	-0.177495	2.57296	0.108704	0.541346
Mboat1	1.90133	-1.25775	2.57037	0.108882	0.541545
Sntb2	0.300523	3.44315	2.56976	0.108924	0.541545
Gdf15	0.775965	1.1385	2.56774	0.109063	0.541699
Fcamr	0.422034	6.05499	2.56754	0.109078	0.541699
Rnf113a2	0.211593	4.59444	2.56529	0.109232	0.541821
Nek6	0.675031	2.99247	2.56524	0.109236	0.541821
Sfi1	0.196098	7.14736	2.5652	0.109239	0.541821
Ube2e3	0.245118	4.9866	2.56427	0.109303	0.541913
Klk1	1.70237	-0.485648	2.56187	0.109469	0.542046
Tsg101	0.212873	5.51624	2.5615	0.109495	0.542046
Tlcd1	0.281617	3.43781	2.56125	0.109512	0.542046
Dennd2a	1.59249	-0.856453	2.55419	0.110002	0.543367
Gltp	0.233132	6.31585	2.55275	0.110102	0.543609
Bora	0.28172	4.2559	2.55129	0.110204	0.54368
Anapc15	0.264736	4.03224	2.55003	0.110292	0.54368
Fgd4	1.3153	0.382197	2.54807	0.110429	0.54368
Gm684	0.633318	1.9062	2.54768	0.110456	0.54368
Egfl7	0.858753	-0.587979	2.54732	0.110482	0.54368
Jag2	0.683286	2.58122	2.54731	0.110482	0.54368
Fbxl22	0.749009	0.274092	2.53887	0.111074	0.545916
Slc22a17	0.565247	2.00263	2.53609	0.11127	0.546652
Slc44a2	0.170241	8.45299	2.53491	0.111353	0.546835
Smim24	0.650093	2.42643	2.53362	0.111444	0.547057
Pole3	0.223331	5.38506	2.5321	0.111552	0.547059
Gypa	2.61659	1.68845	2.53185	0.11157	0.547059
Helq	0.193322	5.04059	2.53133	0.111606	0.547059
Sox5	0.749815	0.922996	2.53061	0.111657	0.547059
Ccdc61	0.263453	4.81867	2.53005	0.111697	0.547059
Hnrnph1	0.144119	9.41057	2.5278	0.111856	0.547498
Whrn	0.211419	5.94758	2.52589	0.111991	0.54778
Pcx	0.390772	2.24832	2.52569	0.112006	0.54778
Gm5428	0.376862	1.6656	2.51985	0.112421	0.548907
Tg	0.574489	1.81045	2.5182	0.112539	0.549031
Plxdc1	1.28073	1.01469	2.51645	0.112664	0.549145
Mettl9	0.251097	4.5166	2.51593	0.112701	0.549145
Stom	0.732235	3.46126	2.50847	0.113236	0.550876
Zfp326	0.204864	5.17027	2.50808	0.113264	0.550876
Ssbp3	0.273262	5.16381	2.50667	0.113365	0.551029
Pdzd11	0.27371	4.29597	2.5052	0.113471	0.551221
Cd80	0.563249	2.51961	2.50483	0.113498	0.551221
Agtrap	0.27462	4.60877	2.50242	0.113672	0.551841
Pdia5	1.46164	-0.763686	2.50153	0.113736	0.551927
Hap1	0.598454	3.05399	2.5004	0.113817	0.552097
Nqo1	0.768245	0.343681	2.49621	0.11412	0.553343
Calm2	0.214147	7.62711	2.49476	0.114226	0.553627
Atp8b4	0.803339	2.5988	2.49074	0.114518	0.554553
Hnrnpll	0.871454	1.97681	2.4902	0.114557	0.554553
Chst14	0.317914	2.76281	2.48661	0.114819	0.555121
Aif1	1.0969	1.15876	2.48585	0.114874	0.555121
Apitd1	0.373807	3.70359	2.48553	0.114898	0.555121
Mgst1	0.884933	2.16772	2.4854	0.114907	0.555121
Anapc5	0.16792	8.25885	2.48218	0.115143	0.556031
Txndc5	0.246322	8.39125	2.47984	0.115314	0.556407
Rab11fip3	0.238845	4.13753	2.47903	0.115374	0.55647
Adamtsl4	0.723361	1.4805	2.47562	0.115624	0.557305
Slc43a1	0.664833	3.65184	2.47285	0.115828	0.557305
Ap2s1	0.232961	6.33441	2.4693	0.11609	0.558339
Sh3bp5l	0.175249	5.12441	2.46814	0.116175	0.558365
Impa2	0.309746	3.77482	2.46451	0.116444	0.558677
Usp11	0.217167	5.9082	2.46432	0.116458	0.558677
Tmc6	0.279995	8.11334	2.46327	0.116536	0.558677
Nup188	0.133088	6.8084	2.46232	0.116606	0.558789
Ly6i	1.71912	1.75616	2.46021	0.116763	0.559236
Tnip2	0.194479	5.95777	2.45917	0.11684	0.559236
Smco4	0.549435	2.58101	2.45791	0.116934	0.559236
Rbl1	0.225709	6.09641	2.45642	0.117045	0.559236
Sh3bp1	0.568605	4.12897	2.45537	0.117124	0.559236
Tcf7l2	1.08494	0.932656	2.45201	0.117374	0.559236
Gnb4	0.710382	2.64392	2.45181	0.11739	0.559236
Hspa2	0.352931	3.5377	2.45167	0.1174	0.559236
Tubb4b	0.280911	7.76453	2.45166	0.117401	0.559236
Ostn	0.932589	-1.01493	2.44897	0.117602	0.559728
Elovl1	0.1944	6.3605	2.44732	0.117725	0.559793
Lrch4	0.363924	3.39828	2.44543	0.117867	0.559793
Tstd3	0.294077	3.31968	2.44435	0.117949	0.559809
2610524H06Rik	0.377244	4.0178	2.44267	0.118075	0.560187
1110008L16Rik	0.24491	3.96845	2.44112	0.118192	0.560516
Ermard	0.22784	4.5743	2.43594	0.118583	0.561203
Cdk6	0.286515	5.96622	2.43504	0.118651	0.561203
Zbtb45	0.215321	4.69109	2.435	0.118654	0.561203
Fhl3	0.237859	5.68408	2.43483	0.118667	0.561203
Rbpms2	0.713231	-0.340982	2.43225	0.118862	0.561902
Atxn2l	0.202234	9.00431	2.43139	0.118927	0.561986
Ccr3	1.95209	0.646262	2.43063	0.118985	0.562037
Raph1	0.784156	1.34758	2.42853	0.119145	0.562344
E2f6	0.204787	4.88888	2.42623	0.11932	0.562878
Grk4	0.409155	2.26241	2.42343	0.119533	0.562878
Krt10	0.447939	0.928614	2.42338	0.119537	0.562878
Frmd5	0.995848	-0.895905	2.4231	0.119558	0.562878
Sec24d	0.560705	3.17972	2.42015	0.119784	0.562878
Actn4	0.140391	8.04831	2.41736	0.119997	0.562878
Enthd2	0.203953	5.24555	2.41691	0.120032	0.562878
Apobec2	0.539827	1.6164	2.41672	0.120046	0.562878
Rin2	0.944842	0.831163	2.4156	0.120132	0.562878
Zw10	0.181615	6.02102	2.41451	0.120216	0.562878
Nefh	0.341023	3.01522	2.41431	0.120231	0.562878
Ear2	2.00638	1.23052	2.41352	0.120292	0.562878
Suv39h2	0.31696	2.99806	2.41255	0.120366	0.562878
F13a1	1.59126	2.34698	2.41019	0.120548	0.563199
Clasrp	0.184207	6.46533	2.40967	0.120588	0.563199
Nuak1	0.919575	2.53543	2.40915	0.120628	0.563199
Ccdc63	0.94493	-0.484217	2.40879	0.120656	0.563199
Efr3b	0.866762	-0.686155	2.4081	0.120709	0.563199
Sema6c	0.696905	-0.148769	2.4	0.121335	0.564966
Rims3	0.889449	0.74232	2.39965	0.121363	0.564966
Dusp8	2.05864	0.085099	2.39633	0.12162	0.565747
Fads2	1.00072	2.31501	2.39421	0.121785	0.565999
Kpna3	0.175775	6.52819	2.39389	0.12181	0.565999
Dgke	0.187054	5.36306	2.39351	0.12184	0.565999
Ltb4r1	2.03286	-0.237637	2.39312	0.12187	0.565999
Spred1	0.403287	4.00887	2.3925	0.121919	0.566004
4930590J08Rik	0.796703	-0.584645	2.38877	0.122209	0.566529
Zswim7	0.313071	2.71077	2.38634	0.1224	0.567131
Abca6	1.55307	-0.122476	2.38497	0.122507	0.567144
Ehmt2	0.148688	7.93123	2.3824	0.122709	0.567182
Fbxo7	0.214519	4.89263	2.38194	0.122745	0.567182
Asl	0.22362	4.64685	2.37765	0.123082	0.56773
Dnah1	0.566521	1.26958	2.37693	0.123139	0.56773
Tmem263	0.182498	4.90369	2.3763	0.123189	0.56773
Dync1h1	0.247749	8.22728	2.37406	0.123366	0.56773
Nav1	0.687315	1.72574	2.37392	0.123377	0.56773
Ankrd13d	0.305424	4.41925	2.37377	0.123388	0.56773
Zfp40	0.316187	3.03376	2.36953	0.123724	0.568836
Sox4	0.67685	3.97531	2.36681	0.12394	0.569202
1110007C09Rik	0.288933	4.18752	2.36625	0.123984	0.569202
Twf2	0.244452	6.42819	2.36519	0.124069	0.56932
Psmc3ip	0.418742	3.41573	2.36003	0.12448	0.570804
Pop4	0.215894	5.00256	2.35809	0.124635	0.571256
Hdac6	0.172791	5.4199	2.3539	0.12497	0.571495
Myo19	0.205152	4.42385	2.35367	0.124988	0.571495
Mrpl54	0.229322	5.48264	2.35275	0.125062	0.571495
Tex15	0.757658	-0.385648	2.35263	0.125072	0.571495
Ccdc88b	0.368639	5.46143	2.35152	0.125161	0.571684
Cep295	0.237845	5.73966	2.34692	0.125531	0.572935
Pih1d1	0.248654	5.56483	2.34602	0.125604	0.572993
Pdcd5	0.238511	5.39897	2.34159	0.125961	0.573584
Ptger2	1.10132	-0.169926	2.33856	0.126206	0.574027
Brd7	0.149757	6.48621	2.3358	0.12643	0.574391
Col27a1	0.521158	4.7724	2.33426	0.126555	0.57458
Acp2	0.587637	3.8435	2.3341	0.126568	0.57458
Lcp2	1.05972	2.09153	2.33329	0.126634	0.574661
Decr1	0.249373	4.43041	2.3295	0.126943	0.575403
Pfdn4	0.231102	4.06251	2.3283	0.127041	0.575564
Paqr7	0.460974	1.82493	2.32788	0.127075	0.575564
Ube2i	0.105909	8.0142	2.32662	0.127178	0.575657
Dhrs4	0.213094	4.64326	2.32644	0.127192	0.575657
Pard3b	0.333511	2.00041	2.32422	0.127374	0.576094
Dpp9	0.127001	6.84433	2.32193	0.127562	0.576094
Adarb1	0.327724	3.41515	2.32113	0.127627	0.576094
Zbed4	0.185941	5.02098	2.32063	0.127668	0.576094
1110012L19Rik	0.264902	3.12286	2.32053	0.127676	0.576094
1700056E22Rik	0.830325	-0.435115	2.31727	0.127944	0.576864
Zfp771	0.330003	4.4032	2.31578	0.128067	0.577077
9430020K01Rik	0.612636	1.57034	2.31552	0.128088	0.577077
Itsn1	0.283354	4.86585	2.3111	0.128454	0.578156
Ppapdc1b	0.337116	3.46126	2.31085	0.128474	0.578156
Ecsit	0.189466	4.83557	2.30722	0.128775	0.578853
St7	0.33001	3.15114	2.30522	0.12894	0.579281
Smpdl3b	1.32816	0.477454	2.3032	0.129107	0.579692
Sik3	0.155342	6.63563	2.29691	0.129631	0.579696
Cep70	0.263613	3.47999	2.29666	0.129652	0.579696
Runx2	1.1254	2.39431	2.29613	0.129697	0.579696
Reep2	0.420793	2.22888	2.29576	0.129728	0.579696
Ndufc2	0.238132	4.80531	2.29471	0.129816	0.579696
Aqp9	1.66665	-0.391388	2.29468	0.129818	0.579696
Dhrs3	0.691656	3.22585	2.29431	0.129849	0.579696
Terf2	0.154889	6.17109	2.29419	0.129859	0.579696
Lin9	0.198529	4.45472	2.29325	0.129937	0.579696
Sh3d21	0.711215	0.0522673	2.29239	0.13001	0.579696
Mto1	0.211205	4.43828	2.28802	0.130376	0.580548
E2f2	0.470151	6.34622	2.28751	0.130419	0.580548
Rhd	1.12669	0.106514	2.28745	0.130424	0.580548
Zfp385a	0.422939	4.99376	2.2863	0.130521	0.580559
Fam20c	1.05762	1.4162	2.28324	0.130779	0.581271
Ttyh3	0.206224	7.8907	2.28154	0.130922	0.581305
Pomgnt1	0.173859	5.5158	2.28113	0.130957	0.581305
Gm8113	2.04207	0.260368	2.28083	0.130981	0.581305
Fah	0.423355	2.00675	2.28083	0.130982	0.581305
Nme4	0.427829	0.999859	2.27865	0.131166	0.581774
Megf8	0.387759	2.3664	2.27639	0.131357	0.582276
Azin1	0.169814	6.95129	2.27593	0.131396	0.582276
Srsf6	0.112976	8.8548	2.27431	0.131533	0.582665
Tbc1d9	0.506394	3.14395	2.27314	0.131633	0.582665
Tnfrsf21	0.448784	3.27719	2.27204	0.131726	0.582665
Tnfrsf8	0.426977	1.01763	2.27201	0.131729	0.582665
Nrarp	0.499479	1.34246	2.27097	0.131818	0.582718
Mis18a	0.212388	4.89974	2.27061	0.131848	0.582718
Athl1	0.32739	4.12691	2.27001	0.131899	0.582718
Chpt1	0.262093	3.3372	2.26848	0.13203	0.582718
Syde2	0.715047	-0.383793	2.26841	0.132035	0.582718
Efnb3	0.459941	1.02818	2.26568	0.132268	0.583055
Neb	0.589817	-0.0340191	2.2638	0.132429	0.583055
2021-09-04	0.6753	-0.200805	2.26236	0.132552	0.583055
Itpripl2	0.675137	2.80518	2.26129	0.132643	0.583055
AI607873	1.1212	1.5839	2.26128	0.132644	0.583055
Trap1	0.136681	7.25457	2.2611	0.13266	0.583055
Arl5c	0.302954	6.85245	2.2601	0.132745	0.583055
Lmtk3	0.572846	-0.270349	2.2601	0.132745	0.583055
Cyb561	0.913525	-0.800076	2.25939	0.132806	0.583055
Trim37	0.190965	5.2833	2.25898	0.132841	0.583055
Arhgef10l	1.19952	2.15634	2.25775	0.132947	0.583055
Zfp54	0.356119	2.24666	2.256	0.133097	0.583055
Plagl2	0.158631	6.24264	2.25574	0.13312	0.583055
Tcea2	0.207652	4.49644	2.2555	0.133141	0.583055
Palb2	0.267526	4.06173	2.25391	0.133277	0.583223
Fam221a	0.518502	2.23338	2.252	0.133442	0.583729
Angpt1	1.3068	-0.885938	2.25043	0.133578	0.584093
Zmynd15	0.633737	2.45671	2.24945	0.133662	0.584093
Pgbd1	0.548692	-0.277955	2.24902	0.133699	0.584093
Isoc2b	0.381796	2.07086	2.24876	0.133722	0.584093
Odf2	0.137234	6.5698	2.24562	0.133993	0.584419
L3mbtl3	0.164369	6.02155	2.24295	0.134224	0.585115
Fcgr1	1.85507	0.307936	2.24199	0.134308	0.585151
Dstn	0.38059	4.50515	2.23663	0.134774	0.586109
Usp1	0.168425	6.92056	2.23239	0.135145	0.587079
Rtn4rl2	1.06786	-0.73495	2.23181	0.135196	0.587079
B3gnt3	0.389202	2.01472	2.22993	0.13536	0.587079
Pvrl4	0.89667	0.100503	2.22968	0.135381	0.587079
Ace	1.44205	0.284387	2.22896	0.135445	0.587079
Dgkh	0.355712	4.70833	2.22675	0.135639	0.587079
Dolpp1	0.183642	4.7897	2.22655	0.135656	0.587079
Yeats2	0.205571	5.53628	2.22532	0.135765	0.587079
Aqp1	2.40322	-1.33503	2.22389	0.135891	0.587079
Miip	0.237477	6.04081	2.22379	0.135899	0.587079
Clk2	0.116448	7.15847	2.22378	0.1359	0.587079
Haus8	0.261963	4.51097	2.22334	0.135939	0.587079
Fam50a	0.211551	6.06841	2.22329	0.135943	0.587079
Tspan4	0.477053	1.19685	2.21813	0.136399	0.588012
Tbc1d19	0.303393	2.29685	2.21514	0.136662	0.588778
Tmem126b	0.234179	4.47028	2.21494	0.136681	0.588778
Shmt1	0.206588	5.73655	2.21444	0.136725	0.588778
Baz1b	0.144892	8.12897	2.21287	0.136863	0.58879
Depdc5	0.143385	5.94087	2.21283	0.136868	0.58879
Fam228b	0.650409	-0.246496	2.21273	0.136876	0.58879
Lrp1	0.931542	3.99808	2.21175	0.136963	0.588951
C3	1.44313	3.50013	2.21021	0.1371	0.589117
1810037I17Rik	0.240681	5.00821	2.2102	0.137101	0.589117
Irf1	0.313632	6.81851	2.20688	0.137396	0.58938
Fzr1	0.249931	6.35574	2.20603	0.137472	0.58938
Gm16286	0.158564	6.99228	2.20492	0.137571	0.58938
Izumo4	0.227055	5.17145	2.20457	0.137602	0.58938
Tuba8	1.50736	-0.792161	2.20422	0.137634	0.58938
Gria3	1.29062	0.881655	2.20395	0.137657	0.58938
Aph1c	0.854492	0.0220255	2.19887	0.138112	0.590476
Gtf2a2	0.162889	5.96982	2.19768	0.138219	0.590581
Zdhhc15	1.15682	-0.873653	2.19749	0.138236	0.590581
Rabl2	0.399318	2.25684	2.19689	0.138289	0.590597
Cd96	0.998687	-0.441749	2.19408	0.138541	0.59075
Git1	0.176392	6.59909	2.19319	0.138622	0.59075
Rad50	0.168405	6.15723	2.19294	0.138645	0.59075
Sox12	0.23089	4.38868	2.19153	0.138771	0.59075
Tmtc3	0.404787	2.43961	2.19139	0.138784	0.59075
Zc3h12b	0.573064	0.209041	2.19073	0.138844	0.59075
Zfp282	0.1991	5.42413	2.19063	0.138852	0.59075
Mfsd2b	0.725064	1.70498	2.18968	0.138939	0.59075
Hdgfrp2	0.20798	6.74775	2.18845	0.139049	0.59075
Slc39a5	0.633397	0.848383	2.18822	0.13907	0.59075
Fam193b	0.190123	7.81841	2.18424	0.13943	0.591857
Serinc5	0.504445	6.22376	2.1804	0.139778	0.592492
Coq6	0.225126	4.66083	2.17705	0.140082	0.593354
Hk3	1.00571	2.19517	2.17648	0.140135	0.593366
C2cd5	0.170451	6.1552	2.17447	0.140318	0.593518
Sort1	0.931911	2.89954	2.17431	0.140332	0.593518
Rgs10	0.379491	4.83331	2.17389	0.14037	0.593518
Hook2	0.211007	4.37911	2.17327	0.140428	0.593549
Fnbp1l	0.718347	1.37432	2.17065	0.140667	0.59435
Creb5	1.2769	-0.955467	2.16378	0.141296	0.595376
Rbm4b	0.198663	4.54179	2.16313	0.141356	0.595376
Cep290	0.33677	2.77511	2.16302	0.141367	0.595376
Mrpl57	0.233018	4.76142	2.16231	0.141432	0.595376
Mfsd7a	1.17937	-0.280155	2.162	0.141461	0.595376
Atp6v1g2	0.365726	3.13312	2.15775	0.141852	0.59639
Fcho1	0.206844	7.79889	2.1559	0.142023	0.596898
Mcf2l	1.206	0.817027	2.15319	0.142274	0.597529
Gm13157	0.219586	5.359	2.15104	0.142473	0.597726
Bcl2a1a	0.938813	1.02228	2.14945	0.142621	0.597726
Slc4a1	2.41584	4.45916	2.14793	0.142762	0.597726
Itgam	1.16909	1.77939	2.14761	0.142792	0.597726
F9	0.680931	1.07148	2.14703	0.142846	0.597726
Cnst	0.177705	5.00595	2.147	0.142849	0.597726
Ryk	0.631853	0.575282	2.14662	0.142884	0.597726
Stard8	0.406848	1.7514	2.14643	0.142902	0.597726
2700081O15Rik	0.65768	4.28688	2.14553	0.142985	0.597726
Glipr1	0.435349	4.06312	2.14288	0.143233	0.597726
Cdk4	0.192734	7.87021	2.14266	0.143253	0.597726
Slc25a40	0.256518	3.72666	2.14182	0.143332	0.597726
Ehbp1l1	0.189156	6.722	2.14106	0.143403	0.597726
Ptov1	0.367584	4.90871	2.141	0.143408	0.597726
Anp32e	0.134648	8.04244	2.141	0.143408	0.597726
Clu	0.876515	-0.149644	2.14054	0.143452	0.597726
Rpgrip1	0.241701	5.4122	2.14038	0.143466	0.597726
Ugdh	0.160843	5.59355	2.14023	0.14348	0.597726
Ktn1	0.159101	7.1145	2.13974	0.143527	0.597726
Spsb2	0.264903	3.3518	2.13338	0.144123	0.599789
Fcer1g	1.02843	4.10079	2.1324	0.144215	0.599964
mt-Nd1	0.292398	11.1287	2.13059	0.144385	0.600249
Slc25a28	0.240356	5.95506	2.12894	0.144541	0.600688
Soga1	0.90017	1.76056	2.12654	0.144768	0.601
Ttc25	0.644348	-0.748371	2.12592	0.144825	0.60103
1700010I14Rik	0.393429	1.81143	2.12139	0.145255	0.602393
Tada2a	0.310911	3.37955	2.12053	0.145336	0.602519
Slc26a6	0.227877	3.48328	2.11927	0.145456	0.602773
Triobp	0.223662	6.30909	2.11822	0.145556	0.6028
Oaf	0.646106	0.670012	2.11697	0.145675	0.602872
Lrrc1	0.248345	3.52899	2.11493	0.145869	0.603466
Phtf1	0.168442	5.22583	2.11423	0.145936	0.603532
Fam110a	0.393337	3.08999	2.11214	0.146135	0.603938
Fen1	0.283662	3.01808	2.10933	0.146404	0.604417
Alkbh2	0.258429	3.37362	2.10565	0.146756	0.60509
Zfp157	0.221712	4.1348	2.1055	0.14677	0.60509
Slamf8	1.06453	0.347952	2.10262	0.147047	0.605501
Alas1	0.216677	5.47948	2.10247	0.147062	0.605501
Olfr173	1.01616	-0.395148	2.10131	0.147173	0.605702
Ube2n	0.157368	6.56628	2.10025	0.147275	0.605913
Fam169a	0.603357	0.322786	2.09641	0.147646	0.606597
Ccnh	0.158187	5.28389	2.08407	0.148843	0.610068
Cd33	1.15019	0.513005	2.0815	0.149094	0.610068
Cep95	0.194015	4.7355	2.07892	0.149346	0.610068
Prrg2	0.345307	2.71362	2.07728	0.149507	0.610068
Scarf1	0.505326	1.36991	2.07716	0.149518	0.610068
Oscp1	0.630071	0.272128	2.07663	0.14957	0.610068
Pomt1	0.179125	4.74553	2.0759	0.149641	0.610068
Gpsm2	0.82437	0.987262	2.07568	0.149663	0.610068
Nup205	0.159107	7.28451	2.07566	0.149666	0.610068
4430402I18Rik	0.722621	-0.721117	2.07565	0.149666	0.610068
Pxylp1	0.589186	1.33346	2.07494	0.149736	0.610068
Ptgs2	1.70243	-1.05538	2.07424	0.149805	0.610068
Fbxo24	1.01847	0.0685175	2.07404	0.149824	0.610068
Leo1	0.197683	4.98856	2.07298	0.149928	0.610184
Rhobtb1	0.365792	2.33337	2.0696	0.150261	0.610906
Myg1	0.228042	5.56185	2.06886	0.150334	0.610906
Cndp2	0.220283	6.0389	2.06788	0.150431	0.610906
Mgst3	0.432247	1.6454	2.06744	0.150474	0.610906
Cdt1	0.21192	6.81521	2.06725	0.150492	0.610906
Tdp1	0.206209	4.99001	2.06572	0.150644	0.611126
Dnajc9	0.218661	7.14395	2.06567	0.150649	0.611126
Atp13a2	0.182847	7.72803	2.06222	0.15099	0.612301
Caml	0.189399	4.66668	2.06094	0.151116	0.612355
Bahcc1	1.21519	-0.0163335	2.05912	0.151297	0.612355
Vwf	1.60269	0.327644	2.05881	0.151329	0.612355
Kifap3	0.235255	3.3164	2.05871	0.151338	0.612355
BC068157	0.831424	-0.713913	2.05832	0.151377	0.612355
Mrc2	0.634128	0.58651	2.05374	0.151832	0.613615
Trim16	0.89553	1.93581	2.05171	0.152036	0.614028
Flrt3	0.939752	0.752668	2.04984	0.152222	0.614038
Vat1	0.283634	6.40777	2.04727	0.15248	0.614038
Zfp820	1.22378	-0.871342	2.04608	0.152598	0.614038
Txlnb	0.452304	1.34833	2.04498	0.152709	0.614038
Ubr7	0.152949	5.93283	2.04487	0.15272	0.614038
Gpr89	0.181321	4.44867	2.04472	0.152735	0.614038
Eps8l2	1.21585	-0.704197	2.04467	0.15274	0.614038
Adora2a	0.276999	4.56734	2.04369	0.152838	0.614038
Wdsub1	0.232415	3.26954	2.04359	0.152849	0.614038
Jag1	0.752835	0.248687	2.04244	0.152964	0.614038
Arl6ip4	0.253833	5.83471	2.04241	0.152967	0.614038
Ift22	0.303513	4.15315	2.04084	0.153125	0.614256
Amica1	0.50183	2.44688	2.03967	0.153242	0.61452
Cd2bp2	0.155734	7.22	2.03914	0.153296	0.614529
Nfix	0.327262	3.59512	2.03804	0.153407	0.614765
Lef1	0.523668	3.88768	2.03594	0.153619	0.614816
Eif2s1	0.151655	6.91912	2.03577	0.153636	0.614816
Tulp2	0.851294	-0.554072	2.03577	0.153637	0.614816
Prpf38a	0.165783	5.5433	2.03536	0.153678	0.614816
Oosp1	0.408244	1.00646	2.03387	0.153828	0.61521
Hbq1b	2.48188	-0.704304	2.03328	0.153888	0.615243
Smtnl2	2.20401	0.218243	2.0301	0.154211	0.616118
Nisch	0.153935	8.48201	2.02661	0.154565	0.617056
Gtf2i	0.146774	7.02053	2.02611	0.154616	0.617056
Ran	0.159506	8.86825	2.02509	0.15472	0.617056
Nptxr	0.677388	-0.280724	2.02254	0.15498	0.61708
Psmd3	0.146506	7.53005	2.02212	0.155022	0.61708
Slc30a6	0.183454	4.18034	2.01955	0.155285	0.617713
Fhit	0.495299	0.2119	2.01494	0.155758	0.618459
Wnt10a	0.391582	6.14556	2.01436	0.155817	0.618459
Hist1h3h	0.91084	-0.391138	2.01342	0.155914	0.618459
Sssca1	0.240565	4.56612	2.01265	0.155993	0.618459
Msh6	0.151347	6.77114	2.01049	0.156215	0.619132
Aplf	0.271531	3.32135	2.00683	0.156592	0.620421
Numbl	0.366257	1.73882	2.0044	0.156843	0.62093
Aldh3b1	0.311966	4.91593	2.00289	0.156999	0.62093
Rbbp8	0.181043	5.11578	2.00269	0.15702	0.62093
Asun	0.141922	5.86465	2.00256	0.157034	0.62093
Fbxo44	0.53434	1.67966	2.00113	0.157182	0.621157
Perm1	0.413863	1.56666	2.0005	0.157248	0.621157
Gas6	1.17141	-0.603246	1.99838	0.157467	0.621659
Nucks1	0.1556	7.63015	1.99808	0.157499	0.621659
Tcerg1	0.145426	7.13298	1.99677	0.157635	0.621781
Pfdn6	0.206542	5.63549	1.99575	0.157741	0.621865
Gm10037	0.554009	0.269393	1.99473	0.157847	0.621909
Tnf	0.396848	3.80606	1.9945	0.157871	0.621909
Sash1	0.57334	2.68964	1.99033	0.158307	0.62279
Flot1	0.231258	4.7559	1.98889	0.158457	0.62279
Lcmt1	0.204417	4.27496	1.98637	0.158721	0.62279
4933427D14Rik	0.173133	4.3593	1.98511	0.158853	0.62279
Dhx34	0.162158	6.00585	1.98499	0.158865	0.62279
Krt222	0.48206	2.10737	1.98297	0.159078	0.622817
Cetn4	0.555072	-0.255522	1.98293	0.159082	0.622817
Wdr54	0.564016	-0.184379	1.98193	0.159187	0.622946
S1pr2	0.614323	1.95305	1.98162	0.15922	0.622946
Arl16	0.229902	4.02769	1.97956	0.159437	0.623067
Zfp653	0.18282	4.8022	1.97878	0.159519	0.623067
Fcgr3	1.3713	1.84162	1.97847	0.159551	0.623067
Dnph1	0.453119	2.41148	1.97786	0.159616	0.623067
Ext1	0.252262	3.907	1.97616	0.159796	0.623356
Atp11a	0.629821	2.30491	1.97441	0.159981	0.623704
Ndufa12	0.236132	5.41042	1.97388	0.160036	0.623704
Hp	1.38109	2.26542	1.97007	0.16044	0.624145
Bzrap1	0.4632	3.02826	1.96979	0.16047	0.624145
Atp1b3	0.133508	7.17118	1.969	0.160554	0.624174
Erf	0.190259	5.83662	1.96873	0.160583	0.624174
Polr2g	0.20742	5.45795	1.9654	0.160937	0.625143
P2ry12	1.08279	-0.92834	1.96411	0.161075	0.625217
Banf1	0.213134	6.86482	1.96302	0.161191	0.625217
Acsf3	0.193744	4.83014	1.96294	0.161199	0.625217
Slc38a7	0.230198	4.89462	1.96275	0.161219	0.625217
Igf1r	0.43178	4.159	1.96029	0.161483	0.625266
Ado	0.146467	5.68563	1.95919	0.1616	0.625266
Papss2	0.742833	2.35397	1.95864	0.161659	0.62529
Cav2	1.03732	-0.230344	1.95634	0.161905	0.625633
Atat1	0.259566	4.01796	1.95528	0.162019	0.625718
Cyth4	0.17992	7.57607	1.95444	0.162109	0.625811
Xkr8	0.290266	2.29839	1.94865	0.162732	0.626505
Cdkn2d	0.340798	4.75963	1.9484	0.16276	0.626505
Fndc7	0.555576	0.449449	1.94837	0.162763	0.626505
Tmem180	0.441688	2.01819	1.94618	0.163	0.626589
Nagk	0.231346	4.49847	1.94282	0.163362	0.626635
Lta4h	0.136153	6.62585	1.94162	0.163493	0.626783
Pak1	0.705062	1.63053	1.93982	0.163688	0.626783
Tmem221	1.11466	-0.0339338	1.93949	0.163724	0.626783
Naa20	0.208635	5.48574	1.93907	0.16377	0.626783
Hmgn3	0.340509	4.7208	1.93705	0.163989	0.626783
Mrpl37	0.157076	6.21521	1.93679	0.164017	0.626783
Nt5e	0.460047	1.30686	1.93585	0.16412	0.626783
Emr4	0.991629	2.63677	1.93541	0.164168	0.626783
2310009B15Rik	0.291849	2.57045	1.935	0.164212	0.626783
Gpr34	0.743169	0.241393	1.9341	0.16431	0.626783
Ghrl	0.751746	0.338041	1.93196	0.164544	0.62712
Mdk	0.400232	1.44617	1.93136	0.16461	0.62712
Elmo3	0.240644	3.69888	1.93032	0.164724	0.627354
Dtx3	0.293682	5.96315	1.92707	0.165079	0.628193
[truncated: 4,601 more rows]

## Sheet: WT_IgM_vs_KO_IgM_up_q05genes
Orai1
Auts2
Orai3
Wnt1
Wnt10b
Rcan1
Stard13
Spp1
Cd79a
Rgs9bp
Cntnap1
Serpinc1
Ccno
Lrrc16b
Otud1
Chga
Gramd1b
Inpp4a
Slc16a11
Zwilch
4930524J08Rik
Zap70
Rab11fip4
Kcnn4
Slc7a7
Spry2
Myh10
Pdcd1
Havcr1
Rad54b
Ctla4
Hist1h3c
Itga9
Synpo
Sh3bgrl2
Wdhd1
Cd70
Hist1h2ai
Bmp1
Eno3
Pkp4
Nrgn
Gpr176
Bmp6
Slc9a5
Slc30a3
Eme1
Dscc1
Ksr2
Ccl22
Syngr4
P2ry1
Tacc2
Cst6
Noxa1
Pard6g
Dlgap5
Ahnak
Brca1
Phyhip
Rasgef1a
3425401B19Rik
Hist1h2ag
Cfap45
Xcl1
Prx
Rtkn2
Pacsin1
Phf19
Cd27
Dmwd
Cd3g
Wnt16
Tnfsf8
Pdgfa
Igfbp7
Fgf13
Tnfrsf4
Wdr90

## Sheet: WT_IgM_vs_KO_IgM_lo
gene	logFC	logCPM	LR	PValue	FDR
Cnr2	-0.768311	6.97029	46.2132	1.06061e-11	4.20498e-08
Mrgpre	-0.851395	4.71	40.3924	2.07751e-10	4.11832e-07
Tsc22d3	-0.742215	6.5208	33.1001	8.7532e-09	1.30138e-05
Sdc4	-0.632584	6.66954	31.8561	1.66027e-08	1.97473e-05
Plaur	-0.795267	5.80844	28.8513	7.81517e-08	7.74613e-05
Neurl3	-0.768261	7.81042	24.5565	7.21627e-07	0.000613074
2021-03-01	-0.928561	7.08609	23.8155	1.06025e-06	0.000840711
Stac2	-0.870981	4.81066	23.0653	1.56591e-06	0.00103472
Apc2	-2.29915	0.172	22.5833	2.01229e-06	0.00119671
Fcrl1	-0.508395	8.11833	21.3847	3.7576e-06	0.00212823
Icosl	-0.767827	7.33199	20.8845	4.87815e-06	0.00263731
S1pr1	-0.629024	7.87233	20.1661	7.09993e-06	0.00344307
H2-DMb2	-0.569046	8.82884	19.9237	8.05936e-06	0.00368685
Scimp	-1.04333	3.21521	19.2567	1.14266e-05	0.0046865
Bcl6	-0.610116	6.31322	18.4469	1.74705e-05	0.00577206
Galnt6	-0.872388	4.87672	17.8467	2.39435e-05	0.00749431
Itgb7	-0.649567	6.89171	17.6896	2.60047e-05	0.00773251
Tcp11l2	-0.637962	6.99102	17.7278	2.5488e-05	0.00773251
Mafk	-0.483311	6.47736	17.2833	3.22001e-05	0.00870426
Gbp3	-0.59965	5.25842	16.9926	3.75251e-05	0.00928406
H2-Ob	-0.4909	9.86611	17.0293	3.6808e-05	0.00928406
Ttpal	-0.43446	7.65367	16.8564	4.03179e-05	0.00959082
Grap2	-0.578528	7.76919	16.1052	5.99192e-05	0.0127264
Fcer2a	-0.727851	9.21713	15.8353	6.91026e-05	0.0141708
Cd53	-0.322815	8.74731	15.707	7.39485e-05	0.0144429
Tnfrsf26	-0.739463	4.67717	15.5438	8.0615e-05	0.0154651
St6gal1	-0.416431	8.09278	14.7302	0.000124041	0.0210764
Fam43a	-0.39036	7.62586	14.0021	0.000182607	0.0285781
Irgq	-0.457162	6.04208	14.0166	0.000181201	0.0285781
Pkib	-0.713006	4.7203	13.9037	0.000192422	0.0289705
Lpxn	-0.441839	6.58704	13.9233	0.000190419	0.0289705
Msrb3	-1.37666	1.75984	13.6528	0.000219911	0.0315875
Spata13	-0.533816	6.58741	13.5591	0.000231165	0.0324458
Stk17b	-0.538386	8.78679	13.2804	0.000268197	0.0346732
Kif9	-0.856409	2.41597	13.2238	0.00027642	0.0353521
Ehhadh	-0.651164	3.07748	12.9018	0.000328271	0.0408869
Scd1	-0.631539	9.54914	12.7661	0.000352954	0.0419803
Spns2	-0.77111	5.17392	12.767	0.000352783	0.0419803
Egr1	-0.457518	7.68387	12.7202	0.000361732	0.0422181
Rnf144a	-0.660276	6.72974	12.5763	0.000390668	0.0451127
Cxcr5	-0.552521	8.16748	12.3885	0.000431984	0.0472128
Pear1	-0.57399	6.01355	12.4317	0.000422103	0.0472128
H2-Aa	-0.534107	11.1854	12.4378	0.000420721	0.0472128
Il4ra	-0.37608	8.05923	12.1799	0.000483061	0.0491071
BC106179	-1.119	2.35268	12.0854	0.000508181	0.0491407
Btnl2	-0.669401	4.04207	12.0965	0.000505174	0.0491407
Pxdc1	-0.563564	6.08156	12.1031	0.000503389	0.0491407
Lmbrd1	-0.358837	7.15718	12.1252	0.000497448	0.0491407
Cytip	-0.316035	8.12427	12.0226	0.000525597	0.0492981
Rnf125	-1.82043	0.120295	11.876	0.000568618	0.0504712
Kbtbd11	-0.684684	6.03061	11.8856	0.000565701	0.0504712
Sh2d6	-1.32135	1.16281	11.887	0.000565281	0.0504712
Syk	-0.338068	9.59723	11.915	0.000556837	0.0504712
Eif2ak3	-0.408416	7.04406	11.9222	0.000554692	0.0504712
Smad3	-0.586857	5.9878	11.8321	0.000582183	0.0511714
Cables1	-0.869523	3.63609	11.7738	0.000600687	0.0517722
Ablim1	-0.377509	8.9464	11.7186	0.000618794	0.0529491
Cd22	-0.383974	9.92249	11.6516	0.000641457	0.0541098
Plekhg3	-0.610948	4.54195	11.5701	0.000670224	0.0549769
Cdh17	-1.15001	1.86239	11.5557	0.00067542	0.0550236
Epha1	-1.4402	-0.223338	11.5213	0.000688047	0.0553567
Cyth1	-0.380726	8.07502	11.3269	0.000763917	0.0567877
Plekhm1	-0.328735	7.31638	11.2298	0.000804964	0.0580257
Snx29	-0.689391	5.36556	11.2429	0.000799288	0.0580257
Fchsd2	-0.474831	7.74441	11.1695	0.000831549	0.0585234
Grm6	-0.63369	3.41827	11.1766	0.000828367	0.0585234
Kmo	-0.332414	7.65775	11.0541	0.000884906	0.0614589
Cacna1i	-0.814024	6.70861	10.845	0.000990635	0.0647397
D8Ertd82e	-0.481364	5.22681	10.7985	0.0010158	0.0656625
Bank1	-0.595007	8.33054	10.7766	0.00102793	0.0657322
Cyp27a1	-0.905607	3.4413	10.739	0.00104904	0.0660568
Acsf2	-0.353589	7.06143	10.742	0.00104729	0.0660568
Ets1	-0.452222	9.5268	10.5718	0.00114825	0.0682001
H2-Eb2	-0.478161	6.94092	10.6558	0.00109724	0.0682001
Fam65b	-0.439984	8.59761	10.6637	0.00109257	0.0682001
Satb1	-0.465503	8.49286	10.5083	0.00118839	0.0682834
Lnx2	-0.421652	5.63126	10.5092	0.00118784	0.0682834
Pglyrp2	-0.636657	3.5072	10.5214	0.00117999	0.0682834
Tnfrsf23	-1.6407	0.431842	10.5409	0.00116764	0.0682834
Trim7	-0.668246	6.12552	10.4785	0.00120769	0.0687284
Pink1	-0.583758	6.16802	10.4805	0.00120638	0.0687284
Il17ra	-0.275466	7.91262	10.4557	0.00122274	0.0690428
Gpr146	-0.507809	4.91036	10.4098	0.00125347	0.0703243
Fgd3	-0.304252	7.20029	10.3147	0.00131972	0.0733492
Cd55	-0.597817	7.98472	10.1745	0.00142399	0.0760307
Cdkl1	-1.56591	1.59349	10.2102	0.00139666	0.0760307
Osbpl5	-0.445563	4.94078	10.1557	0.00143853	0.0763833
Cd74	-0.41375	12.9271	10.1294	0.00145924	0.0768796
Lrrk2	-0.610861	7.09661	10.0696	0.00150733	0.0769335
Prr5	-0.348642	5.90765	10.0808	0.00149818	0.0769335
Snx8	-0.319378	6.83886	10.0834	0.00149614	0.0769335
Ms4a4c	-0.451714	8.06822	10.0281	0.00154173	0.0777004
Fam210b	-0.425629	4.52795	10.0186	0.00154969	0.077772
Tmem231	-1.04362	1.19006	9.77745	0.00176665	0.0843876
Acot2	-0.391821	4.85035	9.76679	0.00177693	0.0844374
Lamp3	-1.22773	1.75461	9.72249	0.00182027	0.0852374
Trp53i11	-0.370472	7.26629	9.70759	0.00183509	0.08526
Pik3ip1	-0.463515	5.53461	9.68621	0.00185656	0.0853341
Ppargc1a	-1.21376	1.47182	9.69104	0.00185169	0.0853341
Lmo2	-0.420135	6.94133	9.64608	0.00189756	0.0861435
Camk1d	-0.473885	5.86103	9.65182	0.00189164	0.0861435
Sell	-0.613033	9.39954	9.61629	0.00192859	0.0863788
Ip6k1	-0.301107	8.02424	9.63105	0.00191315	0.0863788
Smad7	-0.507934	5.88529	9.5388	0.00201173	0.0891539
Ppp1r16b	-0.386451	7.53313	9.46681	0.00209223	0.090821
St6galnac3	-0.692327	2.54494	9.37774	0.00219636	0.0934194
Pgap1	-0.803512	6.67264	9.33155	0.00225242	0.0943319
Xkrx	-0.628441	5.59433	9.34633	0.00223432	0.0943319
Ffar1	-0.481654	6.27593	9.25099	0.00235369	0.0958725
Tbxa2r	-0.701127	3.4073	9.25274	0.00235144	0.0958725
Irs2	-0.616666	7.04123	9.26851	0.00233128	0.0958725
Rhof	-0.396627	6.86262	9.20373	0.00241522	0.0961786
Akna	-0.267	8.68132	9.14265	0.00249719	0.098191
Itpkc	-0.469936	3.59932	9.11027	0.00254179	0.0991213
Capn11	-5.50725	2.19	9.0688	0.00260007	0.0994382
Cr2	-0.872	6.99537	9.06165	0.00261026	0.0995077
B3gnt5	-0.478581	7.97537	9.02084	0.00266919	0.100149
Pde3b	-0.612933	6.85363	8.9412	0.00278809	0.102776
Maml1	-0.392115	5.96937	8.81687	0.00298458	0.106283
Kynu	-0.518933	4.75243	8.82724	0.00296767	0.106283
Ptpn22	-0.386335	5.6063	8.83911	0.00294843	0.106283
Eif3j2	-0.767589	1.71646	8.80488	0.00300425	0.106664
Eno1b	-1.1551	0.291833	8.79925	0.00301355	0.106676
Ptk2b	-0.261689	8.6831	8.76205	0.00307563	0.107148
Cmtm6	-0.325223	7.67974	8.77564	0.00305279	0.107148
Dapp1	-0.290786	5.89751	8.70899	0.00316645	0.108223
Lrrc61	-0.392003	5.01483	8.68175	0.00321412	0.109538
Mgrn1	-0.278602	7.60884	8.64992	0.00327075	0.110833
Ppp1r13b	-0.370254	5.69524	8.60998	0.00334326	0.112648
Lgmn	-0.42027	6.7605	8.5749	0.00340829	0.114192
Arap1	-0.254926	8.05362	8.51198	0.00352817	0.116893
Trim34a	-0.466338	6.55218	8.43931	0.00367195	0.119425
Asb13	-0.314784	5.3474	8.34106	0.00387591	0.123262
Chad	-0.969324	2.4475	8.3008	0.00396276	0.124691
Rnf139	-0.324962	5.54741	8.27724	0.00401451	0.124996
Wscd2	-1.88734	-0.622841	8.2892	0.00398816	0.124996
Ppap2c	-0.523184	2.90354	8.25892	0.00405523	0.125606
Rapgef1	-0.265328	8.43873	8.10216	0.00442125	0.127328
Ciita	-0.448813	8.57241	8.1178	0.00438327	0.127328
Crisp3	-1.31941	4.56912	8.11967	0.00437875	0.127328
Sfxn3	-0.437118	6.249	8.12931	0.00435553	0.127328
Il9r	-0.828387	4.54714	8.13806	0.00433457	0.127328
C130026I21Rik	-1.014	4.49509	8.17191	0.0042544	0.127328
6330409D20Rik	-1.35503	0.567898	8.07368	0.00449127	0.128104
Wbp4	-0.346845	5.67238	8.06069	0.00452358	0.128717
Bmp2k	-0.362577	6.83294	8.0492	0.00455238	0.128969
Dennd3	-0.434214	6.42743	8.0205	0.00462508	0.130491
Eef1a1	-0.320832	13.5677	8.0095	0.00465327	0.130842
Mapk11	-0.53956	6.03555	7.99599	0.00468811	0.130888
Rpl7a-ps5	-1.33428	-0.626734	8.00434	0.00466653	0.130888
Smagp	-0.578542	3.73334	7.95576	0.00479347	0.13199
Lamb3	-0.44838	5.22255	7.96182	0.00477744	0.13199
Gm8369	-0.447	6.99238	7.92157	0.00488488	0.132832
Sfn	-0.381084	6.58613	7.88201	0.00499288	0.134053
Maml3	-0.581334	4.12709	7.85402	0.00507078	0.134936
Rpl23a-ps3	-0.564397	3.10527	7.75557	0.0053547	0.138154
Gm10269	-0.841692	0.960137	7.73673	0.00541087	0.139
Ralgps2	-0.39888	8.28532	7.73932	0.00540311	0.139
Ppm1f	-0.282272	5.59272	7.6791	0.00558641	0.141673
Sypl	-0.340261	6.64026	7.62919	0.00574311	0.142972
Fli1	-0.309846	7.46474	7.58395	0.00588903	0.144421
H2-Eb1	-0.440253	10.7724	7.5909	0.00586637	0.144421
Zfp36	-0.279375	8.13338	7.57388	0.005922	0.144743
Pdcd1lg2	-0.772759	3.08673	7.5033	0.00615861	0.147385
Unc119b	-0.296252	7.21561	7.4949	0.00618739	0.147777
Hepacam2	-0.798804	3.09344	7.47377	0.00626043	0.148923
Il10ra	-0.328408	7.28715	7.45466	0.00632725	0.148952
Tecpr1	-0.35457	6.76168	7.38844	0.00656445	0.151607
B4galnt1	-0.334074	8.10765	7.36174	0.00666262	0.153576
P2ry10	-0.545527	6.92185	7.35511	0.00668725	0.153845
Arhgap15	-0.309367	6.00328	7.34179	0.00673699	0.153987
Tlr1	-0.37123	7.24114	7.28216	0.00696427	0.156584
Rps12-ps3	-0.525924	2.83769	7.25409	0.00707396	0.157561
Cd38	-0.38145	7.80136	7.25782	0.0070593	0.157561
Nacad	-0.577712	3.99538	7.24612	0.00710545	0.157967
Arhgef3	-0.340725	7.84221	7.20157	0.00728399	0.158027
Arhgap26	-0.370863	6.02588	7.20475	0.0072711	0.158027
Skap1	-1.1126	0.214392	7.22217	0.00720086	0.158027
Entpd6	-0.300334	5.6623	7.18418	0.00735491	0.158999
Nuak2	-0.348084	6.15967	7.15292	0.00748419	0.160391
Nxt2	-0.50657	2.7722	7.10439	0.00768954	0.160533
Itpkb	-0.318166	7.22734	7.11219	0.00765617	0.160533
Efna1	-2.38978	-0.968033	7.12681	0.00759398	0.160533
Tgfbr2	-0.370802	8.73993	7.12833	0.00758753	0.160533
Kif19a	-0.868112	2.83881	7.14086	0.00753469	0.160533
Sesn1	-0.326067	7.04516	7.09073	0.00774835	0.160555
Fam84b	-0.67716	3.68837	7.0805	0.00779274	0.161195
Csrnp1	-0.286898	6.24363	7.07139	0.00783244	0.161243
Zfp472	-0.371249	4.59606	7.07567	0.00781375	0.161243
Sema5a	-1.02959	1.83327	7.03851	0.00797753	0.162347
Gm10709	-0.841649	0.71972	7.03048	0.00801339	0.162647
Pxk	-0.281362	8.23245	7.00483	0.00812902	0.163876
Fam101b	-0.710158	5.56722	6.98155	0.00823541	0.164625
Ttbk1	-0.881237	3.76176	6.98291	0.00822919	0.164625
S1pr4	-0.414978	7.27445	6.98311	0.00822824	0.164625
Tmem141	-1.33485	-0.675718	6.97085	0.00828481	0.164882
Slc37a3	-0.379274	4.85936	6.96273	0.00832252	0.16498
Rab6b	-1.01435	4.50566	6.9306	0.0084733	0.166032
Smap2	-0.288926	8.59587	6.89221	0.00865723	0.16825
Gltscr1l	-0.37198	6.53171	6.89404	0.00864834	0.16825
Rpl27-ps3	-0.880106	0.933888	6.8964	0.00863695	0.16825
Ppp3cc	-0.339479	6.37464	6.87232	0.0087541	0.169579
Mreg	-0.406429	6.71711	6.86836	0.00877349	0.169678
Rps27rt	-0.689728	4.04919	6.83188	0.00895449	0.172338
Rpl23a	-0.315384	9.40431	6.82681	0.00897997	0.172549
Tnik	-0.594424	4.19439	6.81182	0.00905564	0.173164
Snx19	-0.279368	5.65208	6.78286	0.00920373	0.175431
Plbd1	-0.736443	4.26615	6.75438	0.00935181	0.176556
Sec16b	-0.984835	1.3682	6.70678	0.00960468	0.178812
Rasa3	-0.371353	8.41996	6.67988	0.0097507	0.18037
Sorl1	-0.314948	8.90714	6.64023	0.00997012	0.183284
Cyp2t4	-1.0249	0.224458	6.61492	0.0101128	0.183798
Entpd5	-0.356285	6.27017	6.61745	0.0100984	0.183798
Ets2	-0.593223	6.86499	6.58932	0.0102593	0.185446
Ankrd6	-1.69389	-0.823342	6.50894	0.0107333	0.189675
F2rl1	-1.02445	1.45819	6.51015	0.0107261	0.189675
Nbl1	-1.08644	0.411577	6.51545	0.0106941	0.189675
Adrb2	-0.330253	5.22522	6.46186	0.0110214	0.19165
Zfp97	-0.502355	2.9358	6.44062	0.011154	0.193214
Dll1	-1.14601	1.11509	6.42727	0.0112381	0.193727
Isoc1	-0.324018	5.36307	6.40784	0.0113617	0.194262
Stk40	-0.213789	6.47365	6.39868	0.0114205	0.194328
Gad1	-0.8338	3.07926	6.40142	0.0114029	0.194328
Arap2	-0.599619	6.12074	6.38151	0.0115315	0.195378
Gcnt1	-0.439306	5.47576	6.37181	0.0115948	0.195892
Serp1	-0.255386	9.347	6.36086	0.0116665	0.196545
Cisd3	-0.422602	4.14322	6.3574	0.0116893	0.196651
Gga2	-0.258437	7.92865	6.34526	0.0117696	0.197165
Prkab2	-0.446056	5.54915	6.3417	0.0117932	0.197282
Gcc1	-0.292115	5.28652	6.33689	0.0118252	0.197541
Nxpe3	-0.330417	6.69988	6.31706	0.0119582	0.198646
Hist3h2ba	-0.779446	2.0125	6.31107	0.0119987	0.198764
Mef2c	-0.35247	9.08927	6.30418	0.0120454	0.198983
Poglut1	-0.273687	5.51251	6.28817	0.0121546	0.199955
Man1a	-0.352783	9.09823	6.2645	0.0123181	0.201096
Prkce	-0.365954	6.29346	6.24892	0.0124269	0.201921
Zfp94	-0.431602	3.5597	6.24976	0.012421	0.201921
Ier5	-0.298969	7.79357	6.22974	0.0125623	0.202735
Rassf2	-0.253247	8.50737	6.21708	0.0126523	0.203361
Ndnf	-1.1388	0.349239	6.19169	0.0128352	0.205662
Ltb	-0.480454	7.53518	6.16963	0.0129962	0.206509
Foxo1	-0.326025	7.58041	6.17034	0.0129909	0.206509
Bcar3	-0.333165	7.48402	6.17805	0.0129344	0.206509
Cd2	-0.513175	6.07552	6.15968	0.0130695	0.207264
Slc25a53	-0.370139	4.92031	6.14672	0.0131656	0.208234
Pde4b	-0.324432	7.42786	6.10592	0.013473	0.211408
Crisp1	-1.86761	-0.48368	6.0758	0.0137046	0.213634
Zfp652	-0.410971	6.36785	6.06749	0.0137693	0.214001
Senp7	-0.387429	6.09693	6.02481	0.0141062	0.216601
Serinc3	-0.211396	10.5333	6.01461	0.0141879	0.217462
Msn	-0.264249	10.2551	5.99888	0.014315	0.218565
Fam53c	-0.29867	6.30357	5.99362	0.0143577	0.218937
Ccny	-0.242778	6.5645	5.88315	0.0152865	0.226988
Mapk12	-0.860078	3.58549	5.86928	0.0154073	0.22758
Ms4a4b	-0.743634	1.5135	5.87148	0.0153881	0.22758
Rhbdf2	-0.331901	6.22053	5.86139	0.0154766	0.228102
Vmn2r97	-1.50129	3.19301	5.85781	0.0155081	0.228284
Klf3	-0.479757	6.97146	5.84453	0.0156255	0.229444
Srms	-0.856344	1.67682	5.82199	0.015827	0.231261
Gm4737	-0.84473	0.0246204	5.81869	0.0158567	0.231411
Inpp5f	-0.339985	6.81758	5.80515	0.0159793	0.232846
Ankrd53	-1.28737	-0.224365	5.8008	0.0160189	0.23292
St3gal6	-0.463591	5.00302	5.79449	0.0160765	0.232935
Socs5	-0.446001	5.19999	5.78995	0.016118	0.232938
Tec	-0.329236	7.08739	5.78696	0.0161455	0.233052
Hexb	-0.287391	6.53585	5.75186	0.0164712	0.235923
Elmsan1	-0.379518	7.61893	5.71723	0.0167993	0.238153
Dgkd	-0.310851	9.36168	5.67711	0.0171876	0.239968
Rnf145	-0.273486	7.54214	5.67926	0.0171666	0.239968
Slc41a3	-0.694697	2.01952	5.68364	0.0171238	0.239968
A930011G23Rik	-0.33577	7.27321	5.68544	0.0171063	0.239968
Lfng	-0.350642	6.63137	5.6658	0.0172988	0.240407
Gm16253	-1.34595	-0.677223	5.65091	0.0174464	0.241259
Aldoa	-0.320107	9.58835	5.63429	0.0176124	0.242457
Rassf5	-0.267974	7.08272	5.61733	0.0177837	0.243405
Rabggta	-0.271934	5.83559	5.61416	0.0178159	0.243566
Jak1	-0.28423	9.25413	5.59975	0.017963	0.244174
Pald1	-2.46786	-0.682813	5.60207	0.0179393	0.244174
Tmem64	-0.504425	6.35474	5.58736	0.0180905	0.245067
Pttg1ip	-0.240951	6.02929	5.58856	0.0180782	0.245067
Tha1	-0.616375	2.51313	5.56097	0.0183652	0.245433
Prrt3	-0.816228	0.946391	5.56334	0.0183404	0.245433
Irf2bpl	-0.344119	6.61903	5.56464	0.0183268	0.245433
Dtx4	-0.47568	5.85842	5.54683	0.0185142	0.245623
5031414D18Rik	-0.293144	6.95241	5.52417	0.0187555	0.247315
Zdhhc23	-0.399583	3.96625	5.50829	0.0189265	0.248742
Insig2	-0.330825	4.50184	5.50559	0.0189558	0.248852
Hcst	-0.580552	3.02678	5.50029	0.0190133	0.249058
Trim59	-0.351212	6.67844	5.49674	0.019052	0.249289
Rfk	-0.317688	6.18846	5.46274	0.0194261	0.251427
Ptp4a2	-0.208845	8.80946	5.46723	0.0193763	0.251427
Zmat3	-0.420776	3.64631	5.46827	0.0193648	0.251427
Cbx7	-0.283194	8.4023	5.46918	0.0193547	0.251427
Hs3st1	-0.464185	4.81716	5.44316	0.0196451	0.253339
Pik3c2b	-0.361435	7.17039	5.42828	0.0198132	0.255042
Rasal3	-0.205957	8.43592	5.40723	0.0200535	0.256193
Abhd17b	-0.331832	6.65404	5.3944	0.0202015	0.256432
Fbxo21	-0.282674	5.06848	5.39692	0.0201723	0.256432
Msmo1	-0.311088	5.92459	5.36909	0.0204967	0.257443
Zfp940	-0.39466	3.2095	5.37269	0.0204545	0.257443
Foxd2	-0.866446	1.12986	5.37369	0.0204427	0.257443
Abhd14b	-0.526625	3.14009	5.37784	0.0203942	0.257443
Fam83g	-0.44325	3.35495	5.33869	0.0208571	0.260043
Tmem14a	-0.939704	0.351644	5.32959	0.0209663	0.260212
Shisa5	-0.367482	10.4729	5.32968	0.0209653	0.260212
Mylip	-0.281118	6.67798	5.31052	0.021197	0.260947
Ganc	-0.306845	5.59541	5.28701	0.0214851	0.261292
Necap1	-0.273377	5.05624	5.28839	0.0214681	0.261292
Rhobtb2	-0.256634	7.39972	5.28968	0.0214521	0.261292
Gpr183	-0.280265	7.00936	5.28994	0.0214489	0.261292
Fem1a	-0.307514	7.01281	5.27402	0.0216459	0.261401
Il6ra	-0.374219	5.55616	5.27454	0.0216395	0.261401
Agpat4	-0.375445	3.458	5.27994	0.0215725	0.261401
Gpatch3	-0.305694	4.22875	5.28196	0.0215474	0.261401
Crlf3	-0.248255	7.71724	5.26205	0.0217953	0.261852
Kctd14	-0.388958	3.98517	5.25444	0.0218909	0.26247
Exoc6b	-0.467797	3.73711	5.24158	0.0220533	0.262827
Xlr4a	-0.608471	3.25122	5.24187	0.0220496	0.262827
Fam102a	-0.283888	6.82412	5.24618	0.021995	0.262827
6330403A02Rik	-0.581467	3.48849	5.24705	0.0219839	0.262827
Tle1	-0.487888	4.19526	5.18793	0.0227443	0.267577
Gpr18	-0.360014	6.11565	5.16267	0.0230774	0.268599
Rassf3	-0.247601	7.12288	5.17679	0.0228906	0.268599
Tmem230	-0.279882	5.11225	5.14142	0.0233616	0.271085
Slc15a2	-3.7042	5.74821	5.13195	0.0234893	0.271772
Klra4	-1.94029	-0.625265	5.11745	0.0236864	0.272991
Egr4	-1.84565	-1.25171	5.11843	0.023673	0.272991
Cyp2d22	-0.625403	2.89397	5.11108	0.0237736	0.273465
Gss	-0.33928	3.81037	5.11152	0.0237675	0.273465
Ebf1	-0.281996	7.58742	5.10319	0.0238819	0.273773
Sidt2	-0.198615	8.20099	5.09406	0.0240079	0.27441
Klhl18	-0.251339	5.81378	5.08397	0.024148	0.275111
Snai1	-0.740994	1.07848	5.07763	0.0242364	0.275734
Tceanc	-0.372914	3.7211	5.0727	0.0243055	0.276112
Bcl9l	-0.286048	6.84484	5.05811	0.0245109	0.27765
1700021K19Rik	-0.261417	7.96506	5.04463	0.0247024	0.279023
H2-Ab1	-0.381533	10.9803	5.04123	0.0247508	0.279073
Mfsd9	-1.08587	-0.150133	5.01119	0.025184	0.281521
Acss1	-0.275418	6.52836	4.99661	0.025397	0.282774
Crebl2	-0.366776	5.01146	4.98765	0.0255288	0.28351
Abca1	-0.56265	6.07699	4.97451	0.0257236	0.284875
Acox1	-0.249059	5.35684	4.95953	0.0259473	0.285759
Klrb1c	-1.63618	-0.653395	4.96513	0.0258634	0.285759
Frmd6	-0.365646	4.17646	4.94906	0.0261048	0.286695
Ddit4	-0.36711	6.7237	4.94124	0.0262232	0.28712
Adck3	-0.359813	5.94987	4.92244	0.02651	0.288161
Nup210l	-0.576355	2.12209	4.8934	0.0269595	0.289725
Prss12	-0.956933	2.12279	4.89361	0.0269563	0.289725
Slc46a3	-0.463838	3.8601	4.88802	0.0270437	0.289781
Cd84	-0.319543	6.44072	4.87015	0.0273251	0.290653
Ctu1	-0.303523	4.23706	4.87451	0.0272563	0.290653
Prr18	-1.14984	0.0637636	4.87728	0.0272125	0.290653
Ap1s3	-0.236598	5.98331	4.86128	0.0274659	0.291418
AB124611	-0.311953	6.72044	4.85858	0.027509	0.291508
Irak2	-0.303583	6.89962	4.84814	0.027676	0.292343
Arhgef18	-0.350785	8.19577	4.81918	0.0281447	0.294677
Ppap2b	-0.640315	2.48168	4.81362	0.0282356	0.295369
Psen2	-0.236444	6.14314	4.80084	0.0284459	0.296525
Tpst2	-0.276973	5.54692	4.76764	0.0289996	0.301505
Mterf1a	-0.429634	3.18491	4.76902	0.0289763	0.301505
Sec31a	-0.181866	7.37251	4.76922	0.0289729	0.301505
Etv3	-0.329036	7.10448	4.75179	0.0292678	0.302705
Ero1lb	-0.230564	6.98611	4.74388	0.0294027	0.303047
Tigd2	-0.287419	5.14362	4.74535	0.0293775	0.303047
Gimap3	-0.30463	8.14947	4.72257	0.0297692	0.304716
Tmod3	-0.265332	8.04644	4.72873	0.0296628	0.304716
Erdr1	-1.28696	5.62474	4.71479	0.0299042	0.30508
Syt11	-0.319335	4.3694	4.71041	0.0299806	0.305328
Limd1	-0.195819	8.10156	4.70099	0.0301452	0.305927
B230307C23Rik	-0.356511	3.32149	4.69904	0.0301794	0.305929
Zfp831	-0.41429	6.33152	4.69006	0.0303376	0.306572
Arl4a	-0.319939	3.61986	4.68342	0.030455	0.307497
Fam69a	-0.331864	5.59908	4.67766	0.0305574	0.30827
Wdfy1	-0.459496	5.62785	4.66381	0.0308047	0.309762
Nebl	-1.02152	0.108534	4.63695	0.0312906	0.31066
Vps33b	-0.236602	5.47699	4.63765	0.0312778	0.31066
Spaca1	-0.881362	0.299279	4.64529	0.031139	0.31066
4930523C07Rik	-0.256072	7.03701	4.64794	0.0310908	0.31066
Diras2	-0.495334	3.32664	4.62997	0.0314182	0.311005
Rph3al	-0.444739	2.91166	4.62517	0.0315061	0.311089
Maml2	-0.387958	5.19364	4.62572	0.0314961	0.311089
Taf5l	-0.258245	6.13468	4.62089	0.0315849	0.311244
Stk26	-0.289189	5.79459	4.62204	0.0315637	0.311244
Snx9	-0.213576	7.833	4.60188	0.0319369	0.313672
Zdhhc18	-0.206177	8.55671	4.60033	0.0319658	0.313697
Nfatc3	-0.356602	8.34003	4.5974	0.0320205	0.313733
Ccni	-0.182682	8.58095	4.58949	0.0321687	0.31465
9130019O22Rik	-0.366636	3.31915	4.56679	0.0325976	0.316405
Ifnar1	-0.210318	7.52021	4.57062	0.0325249	0.316405
S1pr3	-0.458076	3.58007	4.57224	0.032494	0.316405
Lpar5	-0.53629	2.67485	4.5615	0.0326984	0.316448
Gm10076	-0.312813	7.9423	4.55868	0.0327523	0.316712
Slc30a4	-0.321592	5.11907	4.55207	0.032879	0.317679
Zfp273	-0.428985	2.90857	4.5482	0.0329533	0.318138
Wdfy2	-0.341209	5.77954	4.54375	0.0330391	0.31845
Birc3	-0.214193	7.6224	4.54378	0.0330386	0.31845
Nfe2l1	-0.260974	7.53381	4.52949	0.0333155	0.319046
Rnf13	-0.240301	5.93611	4.52393	0.033424	0.31957
Ugcg	-0.296644	7.11457	4.51698	0.0335601	0.319864
BC017643	-0.225969	7.42735	4.50643	0.0337677	0.320793
Rad9b	-0.404108	3.29714	4.50741	0.0337484	0.320793
Fnbp1	-0.205335	8.66178	4.50189	0.0338575	0.321187
Pim3	-0.30628	5.59428	4.49278	0.0340383	0.321822
Fam117b	-0.360709	6.16127	4.4804	0.0342856	0.323133
Lat2	-0.226343	6.88597	4.47667	0.0343606	0.323327
Lrrc40	-0.252063	5.14004	4.46082	0.0346809	0.323606
Zfp213	-0.34434	3.52384	4.46225	0.0346517	0.323606
Fam168b	-0.241305	8.63384	4.46576	0.0345808	0.323606
Txndc16	-0.255589	7.23223	4.47247	0.0344453	0.323606
Prune	-0.288205	4.65199	4.45799	0.0347384	0.323808
Sh3bp5	-0.230436	8.18914	4.4393	0.0351207	0.326603
2410131K14Rik	-0.257264	4.66331	4.42825	0.0353488	0.3277
Imp4	-0.191994	6.62654	4.42082	0.0355029	0.328616
Tmem50a	-0.247962	6.89084	4.41174	0.0356924	0.330114
Rad17	-0.22513	5.44061	4.40925	0.0357445	0.330338
Aldoc	-0.696807	4.92	4.38171	0.0363266	0.334418
Zfp524	-0.515292	2.54656	4.37868	0.0363912	0.334425
Tor1aip1	-0.181125	7.03955	4.36212	0.0367466	0.33482
Mybpc3	-1.00717	-0.0202009	4.36563	0.0366709	0.33482
Kat8	-0.218188	5.30072	4.3675	0.0366307	0.33482
Slc5a6	-0.361852	4.22246	4.36853	0.0366085	0.33482
Gm15448	-0.723929	1.35849	4.36855	0.0366081	0.33482
Crip3	-0.522864	2.61497	4.35631	0.0368721	0.335544
Ifngr2	-0.232123	6.48564	4.34961	0.0370175	0.335885
Zfp113	-0.301198	4.5055	4.34996	0.0370098	0.335885
Slc39a9	-0.211716	6.02309	4.32998	0.0374466	0.337416
Slc15a4	-0.211881	6.64727	4.33096	0.0374251	0.337416
Scml4	-0.329596	6.11635	4.33178	0.0374071	0.337416
C030017K20Rik	-1.2646	1.81055	4.33266	0.0373878	0.337416
Grasp	-0.333467	4.20855	4.3272	0.037508	0.337536
Arhgap25	-0.23353	7.36904	4.30991	0.0378911	0.338096
Rpl17	-0.285775	10.5699	4.3122	0.03784	0.338096
Has3	-0.661175	1.39101	4.3131	0.03782	0.338096
Kif21b	-0.327409	8.70723	4.31443	0.0377905	0.338096
Akt2	-0.17127	7.34009	4.29864	0.0381428	0.339574
Rnf41	-0.21969	5.9209	4.28526	0.0384443	0.341793
Fam212a	-0.569752	2.32697	4.27106	0.0387666	0.342825
Galnt11	-0.252798	5.21835	4.27162	0.038754	0.342825
Map3k19	-0.692278	3.11165	4.25967	0.0390275	0.344101
Neurod4	-1.45331	-0.461212	4.25354	0.0391687	0.34458
Tmem170	-0.418122	3.09586	4.2477	0.0393034	0.34551
Hsdl1	-0.190958	6.19222	4.21376	0.0400975	0.349136
Dtwd2	-0.414128	2.74696	4.21397	0.0400925	0.349136
Ttc38	-0.278583	4.71121	4.20586	0.0402846	0.350014
Cyb5r4	-0.205614	6.35677	4.19341	0.0405813	0.351803
Sash3	-0.20398	8.338	4.19497	0.040544	0.351803
Rbm3	-0.180059	8.60418	4.1911	0.0406368	0.352027
Gimap7	-0.472481	4.53248	4.18211	0.0408527	0.352185
Kremen1	-0.272628	4.68621	4.18473	0.0407896	0.352185
Ggps1	-0.227356	5.33084	4.18715	0.0407315	0.352185
Morn3	-3.72386	0.419261	4.17072	0.0411284	0.352944
Sun2	-0.161952	8.15172	4.17236	0.0410884	0.352944
Traf3	-0.213296	6.86745	4.17241	0.0410874	0.352944
Cyb561d2	-0.302954	4.17943	4.15991	0.0413915	0.353193
Zscan25	-0.256296	4.61899	4.16183	0.0413447	0.353193
Hbp1	-0.263062	5.57765	4.16309	0.041314	0.353193
Pdxk	-0.340853	5.0614	4.16683	0.0412227	0.353193
Tmem62	-0.245044	4.5841	4.1428	0.0418118	0.353203
Irak3	-0.328817	4.95914	4.14427	0.0417756	0.353203
Pyroxd2	-0.947295	0.298894	4.14882	0.0416635	0.353203
Plekhm3	-0.301109	6.38433	4.1491	0.0416566	0.353203
Zfp319	-0.231443	5.48841	4.15543	0.0415012	0.353203
Gm6020	-0.808432	0.00129165	4.15798	0.0414388	0.353203
Cd59a	-1.37198	-0.723892	4.13484	0.0420092	0.354193
AU019823	-0.198693	5.36521	4.13159	0.0420898	0.354544
Slc39a1	-0.183797	6.26346	4.11841	0.042419	0.356056
Fibcd1	-0.510567	4.22219	4.11515	0.0425008	0.356491
Nme2	-0.688149	0.351276	4.10955	0.0426418	0.356991
Rps18-ps3	-0.719126	0.384243	4.10733	0.0426976	0.357135
Gmeb2	-0.234928	6.40534	4.10231	0.0428246	0.357945
Kdm7a	-0.412927	7.06077	4.10081	0.0428626	0.358011
Lrig2	-0.267937	5.581	4.08842	0.0431779	0.359132
Trim25	-0.306524	8.021	4.0648	0.0437859	0.361911
Arhgef11	-0.293824	5.77604	4.05406	0.0440652	0.363462
Itpr3	-0.244138	7.96643	4.05483	0.0440451	0.363462
Gm9493	-0.439695	2.88694	4.04602	0.0442755	0.364438
Blk	-0.200915	8.89743	4.04353	0.044341	0.364473
Abca5	-0.565366	1.62434	4.03815	0.0444826	0.365132
A630033H20Rik	-0.40656	4.48337	4.02892	0.0447267	0.36537
Hus1	-0.310265	5.17086	4.02219	0.0449054	0.366327
Cyp4v3	-0.375875	4.06959	4.01769	0.0450252	0.366368
Stk10	-0.180263	8.07104	4.01155	0.0451897	0.366385
Sbk1	-0.262757	8.66667	4.00411	0.0453895	0.367254
Esco1	-0.267638	6.52245	4.00508	0.0453634	0.367254
Zfp260	-0.2971	5.52646	3.99762	0.0455646	0.367919
Carns1	-0.337024	5.82348	3.9812	0.0460108	0.368123
Zfyve28	-0.667698	1.50917	3.98833	0.0458164	0.368123
Blcap	-0.260885	4.34705	3.98978	0.045777	0.368123
Synj2bp	-0.253229	5.49354	3.97812	0.0460951	0.368451
Map4k3	-0.387854	3.57301	3.96616	0.0464234	0.370081
Cipc	-0.267336	5.67755	3.94371	0.0470468	0.372305
Tpt1	-0.215296	11.2327	3.93263	0.0473579	0.373277
Lyn	-0.171526	8.48869	3.93333	0.0473382	0.373277
Tmem116	-0.473062	2.86851	3.91764	0.0477819	0.375385
H2-DMb1	-0.301978	6.87056	3.90889	0.0480313	0.37634
Alcam	-0.255212	6.64059	3.8988	0.0483206	0.377187
Cul4a	-0.226905	5.95875	3.89116	0.0485409	0.377844
Plcd3	-1.14539	2.27497	3.8853	0.0487105	0.378668
Slc5a10	-1.33731	-0.720664	3.88114	0.0488315	0.378866
Gm10221	-0.716065	0.3543	3.88327	0.0487695	0.378866
Dazap2	-0.177708	8.7667	3.87305	0.0490674	0.3802
Ms4a1	-0.271782	9.77496	3.86707	0.0492424	0.38106
Kbtbd2	-0.236	5.99355	3.86255	0.0493753	0.381344
1110059E24Rik	-0.29094	5.65465	3.86277	0.0493688	0.381344
Thtpa	-0.348419	3.04653	3.86472	0.0493114	0.381344
Gm9843	-0.383582	4.51711	3.85641	0.0495562	0.38175
Uhrf1bp1l	-0.333083	6.44938	3.8485	0.0497905	0.382347
Lats2	-0.250465	5.3374	3.84937	0.0497646	0.382347
Tsc22d2	-0.304609	6.01953	3.82767	0.0504129	0.385602
Boll	-0.896813	-0.274899	3.81882	0.0506799	0.38566
Sp100	-0.257907	8.93196	3.81923	0.0506676	0.38566
Cdk13	-0.257039	7.70508	3.81958	0.0506568	0.38566
Zfp655	-0.227962	5.40938	3.82054	0.0506278	0.38566
Pisd	-0.249755	4.41449	3.82129	0.0506054	0.38566
Dtx1	-0.324818	7.42792	3.82567	0.050473	0.38566
Trim65	-0.230213	5.41804	3.81388	0.0508297	0.386305
Rftn2	-0.361274	4.23917	3.79206	0.0514961	0.388886
Phf21a	-0.243366	6.74997	3.7921	0.0514949	0.388886
Rasgrp3	-0.328391	7.55121	3.77897	0.0519007	0.389763
Mllt6	-0.310515	8.54292	3.77566	0.0520034	0.390239
Cbfa2t2	-0.23177	5.21273	3.77156	0.0521309	0.390456
Slc35d2	-0.318134	3.62745	3.7699	0.0521828	0.390599
Ccnj	-0.257939	5.21994	3.75977	0.0524998	0.391676
F8a	-0.283213	4.31733	3.74803	0.0528699	0.392776
Cdkl4	-1.26843	-0.589255	3.74375	0.0530055	0.393223
Tacstd2	-0.432383	3.5777	3.73176	0.0533872	0.395139
Fbxo32	-0.302519	4.41899	3.71159	0.0540359	0.398947
Gm11808	-0.417523	3.18383	3.70823	0.0541448	0.399255
Mfap1b	-0.252855	4.82587	3.70216	0.0543422	0.400215
Cdc42se2	-0.189828	7.72996	3.69676	0.0545181	0.400518
Jmjd4	-0.241744	4.76592	3.69761	0.0544905	0.400518
Dennd2d	-0.226881	6.13618	3.69866	0.0544562	0.400518
Socs6	-0.290533	4.49161	3.69907	0.0544429	0.400518
Casp6	-0.31281	4.13151	3.69551	0.054559	0.40057
Akap13	-0.267859	8.54615	3.68934	0.0547611	0.401312
Tmem71	-0.320608	4.76551	3.67034	0.0553889	0.40395
Zfp81	-0.365491	4.33679	3.6736	0.0552807	0.40395
2021-09-06	-0.199828	7.96405	3.6658	0.0555399	0.404113
Pyurf	-0.284441	3.73555	3.66657	0.0555145	0.404113
Fxyd5	-0.347891	6.29314	3.66288	0.0556374	0.404493
Ezh1	-0.206621	6.63607	3.65897	0.055768	0.405195
Hnrnph2	-0.175744	7.33143	3.65511	0.0558976	0.405589
Map3k15	-0.515567	2.60478	3.63442	0.0565964	0.408469
Fmo5	-0.389247	3.80582	3.63131	0.0567023	0.408985
Map3k9	-0.373097	4.68978	3.62997	0.0567479	0.409051
Olfr166	-0.648162	0.453485	3.62321	0.0569788	0.410233
D10Wsu102e	-0.188907	6.37773	3.61193	0.0573664	0.411575
Akirin1	-0.193941	6.38373	3.61369	0.0573059	0.411575
Lbhd1	-0.301167	2.96046	3.60758	0.0575166	0.411614
Gm9396	-0.7253	0.796587	3.60876	0.0574758	0.411614
Vps37b	-0.24616	5.73693	3.61054	0.0574146	0.411614
A430078G23Rik	-0.366861	6.3229	3.60431	0.0576298	0.412176
Ctss	-0.229478	8.46502	3.60005	0.0577777	0.412986
Foxj2	-0.249443	6.54664	3.59659	0.0578982	0.413102
Cox7a2l	-0.241888	7.69085	3.59146	0.0580773	0.413636
Stat5b	-0.215426	7.38275	3.58443	0.0583234	0.414396
Oxld1	-0.410666	2.73097	3.58258	0.0583885	0.414611
Sec62	-0.169666	6.65996	3.57054	0.0588132	0.417129
Samd9l	-0.368006	8.25057	3.56869	0.0588788	0.417345
Tk2	-0.210331	6.22918	3.56348	0.0590637	0.418157
2310022B05Rik	-0.291989	3.9476	3.55975	0.0591965	0.418848
Disc1	-1.01181	-0.213441	3.55773	0.0592687	0.419109
Rab5b	-0.186333	7.05599	3.55149	0.0594921	0.419882
Gm5786	-0.86409	-0.662825	3.5431	0.0597935	0.420102
Bcl3	-0.264229	6.1038	3.545	0.0597253	0.420102
Rnf138	-0.252807	5.52797	3.5482	0.0596101	0.420102
Smim14	-0.257004	7.94027	3.53439	0.0601083	0.421786
Aaed1	-0.272823	4.98722	3.52448	0.060469	0.423556
Rps12	-0.220827	10.5358	3.51532	0.0608038	0.424663
Vps33a	-0.175423	6.28254	3.50353	0.0612381	0.42593
Spin1	-0.180761	6.84914	3.50441	0.0612058	0.42593
Ssh1	-0.283391	6.46617	3.49578	0.0615253	0.427193
Daam1	-0.355509	3.25908	3.49047	0.0617229	0.427652
Slc30a1	-0.276504	4.74442	3.48319	0.0619949	0.428908
Tollip	-0.228398	6.02169	3.48017	0.0621084	0.428988
Selt	-0.176594	7.4771	3.47162	0.0624301	0.43046
Rapgef4	-0.388251	5.09833	3.46564	0.0626563	0.43102
Zfp128	-0.437849	2.4487	3.46447	0.0627004	0.431075
Rragd	-0.571037	2.08587	3.4611	0.0628285	0.431456
Tspear	-0.637791	0.622954	3.46139	0.0628176	0.431456
Slc24a5	-0.649748	0.565376	3.45922	0.0628999	0.431697
Gipc3	-0.381543	3.00222	3.45571	0.0630337	0.431802
Hopx	-0.405977	2.68457	3.4491	0.0632864	0.432142
Scn4a	-0.275149	7.17122	3.44991	0.0632551	0.432142
Dusp22	-0.214801	4.77012	3.45019	0.0632445	0.432142
Wars2	-0.302204	4.26883	3.4459	0.0634088	0.432693
Chst10	-0.415827	5.91563	3.44186	0.0635641	0.432759
Rhoh	-0.221603	6.71853	3.44353	0.0635001	0.432759
Extl1	-0.560831	2.44379	3.43117	0.0639766	0.434187
Eef2	-0.169622	12.2496	3.43296	0.0639075	0.434187
Rplp2	-0.215396	10.0708	3.40483	0.065006	0.437574
Lypla1	-0.194097	5.81438	3.40821	0.0648728	0.437574
Mob3b	-0.418664	2.54928	3.40866	0.064855	0.437574
Sh2b3	-0.154955	8.11565	3.40121	0.0651485	0.43803
Qrfp	-0.668157	2.71188	3.38761	0.0656881	0.438191
Apln	-0.871896	-0.0260142	3.38815	0.0656668	0.438191
Zbtb39	-0.283363	4.96045	3.38926	0.0656222	0.438191
Cdkl3	-0.513067	2.14878	3.38941	0.0656163	0.438191
Gns	-0.171091	8.21683	3.39072	0.0655642	0.438191
Rin3	-0.264985	7.47249	3.39942	0.0652195	0.438191
H2-DMa	-0.321611	7.49046	3.37466	0.0662061	0.439428
Lysmd3	-0.319198	4.74995	3.37468	0.0662053	0.439428
Rplp0	-0.207411	10.6545	3.3754	0.0661765	0.439428
Aqp3	-0.711768	0.88988	3.36411	0.0666315	0.440776
Sgpp1	-0.281683	5.53894	3.36572	0.0665666	0.440776
Rgmb	-0.663687	1.47218	3.35249	0.0671032	0.443157
Mppe1	-0.226513	5.16546	3.34687	0.0673328	0.44418
Impact	-0.317242	4.89841	3.34747	0.0673084	0.44418
Trappc5	-0.208871	6.20477	3.33473	0.0678317	0.446303
Paip2b	-0.206745	5.99267	3.3327	0.0679154	0.446537
Tmem108	-0.440043	3.09261	3.32649	0.0681721	0.447483
Cerk	-0.215551	8.46173	3.32444	0.0682571	0.447771
Rhoq	-0.241203	6.08003	3.32124	0.0683903	0.448173
Aacs	-0.225296	5.75084	3.31615	0.0686023	0.449067
9330161L09Rik	-0.996892	-0.465407	3.31276	0.068744	0.4495
Rbm34	-0.212535	5.51066	3.31324	0.0687239	0.4495
Ank	-0.361886	5.38093	3.30689	0.0689899	0.450366
4632415L05Rik	-0.288522	4.34492	3.29159	0.0696356	0.451115
Cd83	-0.199203	9.22952	3.29348	0.0695554	0.451115
Pax5	-0.283948	9.71726	3.29721	0.0693975	0.451115
Dtd2	-0.343057	3.25702	3.29916	0.0693154	0.451115
Mief1	-0.191955	5.76701	3.28021	0.0701201	0.451792
Tango6	-0.254737	4.10888	3.28037	0.0701131	0.451792
Zbtb43	-0.264402	5.41547	3.26613	0.0707241	0.453289
Rhbdf1	-0.543469	3.65468	3.26163	0.0709186	0.453538
Bcl2	-0.310207	6.53627	3.26276	0.0708698	0.453538
Susd3	-0.297028	5.41035	3.2592	0.0710238	0.453682
Derl1	-0.164764	6.93733	3.25202	0.0713356	0.455185
Crk	-0.218709	6.58247	3.24952	0.0714444	0.455266
Gm2a	-0.190579	7.81171	3.25069	0.0713934	0.455266
Zfp608	-0.281504	6.39166	3.2346	0.0720977	0.457608
Chuk	-0.245182	6.43667	3.22904	0.0723432	0.458662
Ldlr	-0.307703	6.63576	3.22641	0.0724594	0.458665
Slc26a10	-0.473684	1.9235	3.22753	0.0724099	0.458665
Arhgap9	-0.179549	7.31806	3.2182	0.0728236	0.460481
Gucd1	-0.259386	6.61999	3.2154	0.0729485	0.460597
Syngr2	-0.197461	8.77477	3.21315	0.0730488	0.460924
Got1	-0.214991	6.29569	3.20935	0.0732186	0.461751
Glipr2	-0.313794	4.86701	3.20758	0.073298	0.462006
Surf6	-0.189701	5.99405	3.19979	0.0736479	0.46323
Rps4x	-0.215251	10.7953	3.20023	0.0736278	0.46323
Rps13	-0.224141	9.65937	3.20107	0.07359	0.46323
Hif1an	-0.21639	6.63986	3.197	0.0737737	0.463531
Wdr25	-0.357216	2.76885	3.18329	0.0743947	0.46508
Amfr	-0.149931	7.33548	3.1845	0.0743396	0.46508
Klhl42	-0.303825	5.54103	3.17695	0.0746841	0.46576
Apol7e	-1.0246	-0.171313	3.17463	0.07479	0.465936
Ppp3ca	-0.172644	7.65265	3.16916	0.0750409	0.46632
Otud6b	-0.22039	5.44039	3.16956	0.0750226	0.46632
Ghdc	-0.260982	4.07732	3.15885	0.0755165	0.468053
Hcrtr2	-0.605549	2.86676	3.15141	0.0758613	0.4697
Rdh13	-0.257348	4.25284	3.14888	0.0759792	0.469941
Rbms2	-0.200512	5.50914	3.139	0.0764407	0.471814
Spata2	-0.220137	5.97086	3.13958	0.0764133	0.471814
Gm10767	-0.476633	1.41681	3.13081	0.0768257	0.472577
Tgoln1	-0.255752	7.05834	3.11529	0.0775609	0.474786
Lrsam1	-0.241437	4.19345	3.11141	0.0777457	0.47494
Cr1l	-0.155273	6.64562	3.11184	0.077725	0.47494
B4galt1	-0.202647	7.62207	3.10757	0.0779291	0.475816
Gm6793	-0.445197	1.64223	3.10246	0.0781742	0.475994
Scaper	-0.285787	4.80145	3.10337	0.0781303	0.475994
Ccbl1	-0.272411	3.33226	3.09302	0.0786289	0.476141
Sag	-0.638138	0.984158	3.09432	0.0785657	0.476141
Herc3	-0.271647	5.75656	3.09566	0.0785012	0.476141
Sptlc1	-0.202574	5.75306	3.08749	0.0788963	0.477068
Zfp869	-0.239982	5.7154	3.07442	0.0795329	0.478969
Gm14325	-0.43133	2.81167	3.06902	0.0797977	0.480078
Ppm1a	-0.165508	6.4743	3.06503	0.0799936	0.480326
Szrd1	-0.14528	7.47395	3.06138	0.0801733	0.480636
Dnajc5	-0.167365	7.8127	3.05915	0.0802837	0.480813
Pnrc2	-0.156282	7.24796	3.05219	0.0806285	0.481665
Pacs1	-0.210073	6.83311	3.05236	0.0806197	0.481665
Ssh2	-0.330469	7.44881	3.04513	0.0809799	0.482835
Xpc	-0.214166	5.22484	3.03883	0.0812947	0.484255
Atp6ap1	-0.155673	7.64992	3.03635	0.0814189	0.484441
Zfp72	-0.39019	2.71223	3.03526	0.0814736	0.484523
Calcrl	-0.43501	3.91686	3.02793	0.0818421	0.484994
Ranbp6	-0.307547	5.70171	3.02876	0.0818006	0.484994
Mnat1	-0.242379	4.12003	3.02877	0.0818	0.484994
Nphp3	-0.398788	3.41932	3.02957	0.0817597	0.484994
Irf5	-0.160869	8.31218	3.03105	0.0816851	0.484994
BC005537	-0.147365	8.75287	3.02319	0.0820818	0.485953
Cry2	-0.271475	4.71387	3.01787	0.0823517	0.487067
Fam134c	-0.143161	7.48026	3.0119	0.0826556	0.48741
Pycr1	-0.408498	4.18338	3.01227	0.0826366	0.48741
Malt1	-0.205692	7.86978	3.01369	0.082564	0.48741
Cfap97	-0.267469	5.48411	3.00946	0.0827799	0.487659
Lpp	-0.383274	5.48782	3.00225	0.0831491	0.487826
Serpinb7	-0.766179	0.85934	2.99571	0.0834851	0.488667
Wipi2	-0.153623	7.10729	2.99166	0.0836941	0.488938
Zfp263	-0.195708	6.4677	2.98714	0.0839283	0.489575
Btk	-0.162292	8.03103	2.98528	0.0840249	0.489658
Vmac	-0.257083	4.13	2.98358	0.0841132	0.489933
Add1	-0.181176	9.04651	2.98051	0.0842726	0.490416
Otulin	-0.226004	6.33608	2.97888	0.0843576	0.490443
Gm614	-0.475555	1.64934	2.97506	0.0845571	0.491315
Snap23	-0.207468	5.70852	2.97379	0.0846236	0.491451
Srebf2	-0.169487	9.66243	2.97217	0.0847083	0.491473
Slc39a3	-0.230868	4.94545	2.96562	0.0850516	0.492265
Gm21885	-0.938346	-0.793774	2.96411	0.0851311	0.492485
Snap29	-0.187546	6.63524	2.96225	0.0852294	0.492537
Prcp	-0.211524	6.8523	2.95887	0.0854076	0.493125
1110051M20Rik	-0.315062	2.86801	2.95181	0.0857812	0.494083
Rbl2	-0.276813	6.21568	2.94336	0.0862312	0.494758
Tmem59	-0.181865	6.37777	2.94535	0.0861253	0.494758
Tank	-0.221443	5.99377	2.94595	0.0860929	0.494758
Ctse	-0.313671	4.62806	2.94727	0.0860228	0.494758
Nfatc2	-0.259151	5.44269	2.94199	0.0863041	0.494938
Ipo8	-0.263053	6.35264	2.94119	0.0863471	0.494946
Clcn4-2	-0.156657	6.71416	2.93369	0.0867489	0.495102
Thnsl1	-0.382142	2.34985	2.93444	0.0867087	0.495102
Elac1	-0.338662	4.58449	2.93508	0.0866744	0.495102
Ankle2	-0.202876	6.89782	2.93047	0.0869224	0.495616
Strip1	-0.152763	6.40323	2.92517	0.0872081	0.496335
Dynlt1b	-0.519335	2.61469	2.91381	0.0878244	0.498165
Sertad2	-0.223503	5.39002	2.90625	0.088237	0.499282
Ostm1	-0.204029	5.32888	2.90449	0.088333	0.49935
Rras2	-0.205856	5.62706	2.90092	0.0885289	0.499597
Capn10	-0.253446	4.09378	2.90199	0.0884701	0.499597
Fzd9	-0.714045	-0.28389	2.89731	0.0887276	0.499605
Vps41	-0.177341	6.29111	2.89839	0.0886678	0.499605
Egr3	-0.343784	8.96179	2.89029	0.0891152	0.501084
Chp1	-0.185212	6.6303	2.88796	0.0892436	0.5014
Rnf216	-0.156221	7.00899	2.88189	0.089581	0.502299
Snx2	-0.16228	8.671	2.88191	0.0895797	0.502299
Ube2cbp	-0.397406	2.79484	2.88351	0.0894906	0.502299
Vav2	-0.204788	7.82041	2.87961	0.0897079	0.502584
Cadm4	-0.591247	1.12694	2.87161	0.0901548	0.504375
Irf4	-0.265741	9.15807	2.86618	0.0904592	0.504449
Sgms1	-0.257833	6.6405	2.86859	0.090324	0.504449
Adam9	-0.203449	5.28335	2.85882	0.0908741	0.505309
BC027231	-0.293408	4.55204	2.8481	0.0914821	0.505852
Gramd4	-0.200398	6.71955	2.84836	0.0914672	0.505852
Ankrd37	-0.741543	3.62444	2.85019	0.0913629	0.505852
Mttp	-0.438778	1.90472	2.84414	0.0917075	0.505958
Suclg2	-0.24638	5.48419	2.84287	0.09178	0.506055
Hivep2	-0.385615	6.90317	2.83778	0.0920712	0.507192
Fbxo33	-0.226561	5.26495	2.83604	0.0921709	0.507302
Foxp1	-0.203436	9.29284	2.82773	0.0926491	0.507488
Tlr3	-0.863499	0.624878	2.82776	0.0926475	0.507488
Zfp296	-0.225051	5.16775	2.83015	0.0925098	0.507488
Zcchc18	-0.301447	4.07935	2.8305	0.0924894	0.507488
Ier5l	-0.365253	3.52721	2.83089	0.0924668	0.507488
Rap2c	-0.183231	6.5391	2.81825	0.0931978	0.508717
Zfp943	-0.256696	5.04853	2.81885	0.0931629	0.508717
Bin1	-0.176738	7.99959	2.81963	0.0931177	0.508717
Ryr2	-0.93328	1.22863	2.81648	0.0933007	0.509045
Med19	-0.21344	5.09093	2.8128	0.0935147	0.509045
Gm7120	-0.724904	1.37243	2.81378	0.0934577	0.509045
Rusc2	-1.10126	-0.156263	2.81569	0.0933468	0.509045
Foxo4	-0.204681	5.90054	2.80787	0.0938029	0.509914
Gnmt	-0.731576	0.53877	2.80078	0.0942184	0.511606
Crem	-0.256935	4.86495	2.79185	0.0947446	0.511759
Slc35g1	-0.919787	2.87082	2.79195	0.094739	0.511759
E330009J07Rik	-0.321276	5.56344	2.79197	0.0947374	0.511759
Prkar1a	-0.138489	8.81689	2.79369	0.0946361	0.511759
Yipf4	-0.193858	5.4611	2.7946	0.0945826	0.511759
Polr3f	-0.228732	5.43493	2.79485	0.0945678	0.511759
Cant1	-0.145294	6.71144	2.79517	0.0945488	0.511759
Kdm4c	-0.204099	5.41928	2.79828	0.0943657	0.511759
Ticam1	-0.252998	5.91387	2.79004	0.0948517	0.512104
Pde7b	-1.08789	0.369481	2.7874	0.0950084	0.512485
Fbxl5	-0.173385	6.26957	2.78011	0.0954413	0.513423
Rps20	-0.21943	10.2482	2.78045	0.0954214	0.513423
Fam120c	-0.406605	3.66065	2.78139	0.0953655	0.513423
Manea	-0.28255	6.22581	2.77062	0.0960093	0.513691
Il16	-0.233604	7.3075	2.77077	0.0960001	0.513691
mt-Co3	-0.500873	5.27088	2.7737	0.0958244	0.513691
Insig1	-0.225233	6.81639	2.77501	0.0957463	0.513691
Dnajc27	-0.267839	5.06837	2.77626	0.0956713	0.513691
Pdcl	-0.194855	5.42673	2.76431	0.0963883	0.514561
Spin2c	-0.67183	0.206182	2.76528	0.0963299	0.514561
Fam154b	-0.845412	-0.236554	2.76169	0.0965462	0.514711
Cdk19	-0.189301	6.92411	2.75029	0.0972368	0.516291
Fam49b	-0.152466	7.81411	2.74518	0.0975481	0.516809
Dedd2	-0.181439	6.62889	2.74175	0.0977574	0.517227
Zfp318	-0.283008	8.3562	2.74177	0.0977564	0.517227
Gnb2l1	-0.182787	10.9056	2.74202	0.0977414	0.517227
Hps6	-0.205178	4.21799	2.7367	0.0980673	0.518406
Rgs14	-0.210511	5.94068	2.72759	0.0986278	0.519931
Csnk1g3	-0.144857	6.90639	2.71161	0.0996204	0.520977
Stx17	-0.234551	5.75037	2.71205	0.0995929	0.520977
Zfp952	-0.22311	4.56161	2.71242	0.0995696	0.520977
Zfp623	-0.324578	2.94647	2.71897	0.0991623	0.520977
Ddx6	-0.259272	9.34828	2.70032	0.100328	0.522919
Nrbf2	-0.196136	4.56436	2.70125	0.10027	0.522919
Map3k3	-0.204931	6.62178	2.6974	0.100512	0.523419
Col4a5	-1.08413	-0.708424	2.69191	0.100859	0.524766
Faim3	-0.241296	10.5342	2.68736	0.101147	0.525348
Prkacb	-0.186134	6.79888	2.68387	0.101369	0.525352
Polk	-0.280543	4.05217	2.68424	0.101346	0.525352
Mvd	-0.21393	5.34006	2.68619	0.101222	0.525352
Abcb10	-0.270371	5.47384	2.67903	0.101678	0.526035
Lpar2	-0.214432	5.51663	2.67569	0.101891	0.526223
Rpl10a	-0.174564	10.1143	2.67688	0.101815	0.526223
Gm10778	-0.805162	-0.227658	2.67237	0.102104	0.526638
Igj	-0.904799	7.75033	2.67253	0.102093	0.526638
Cast	-0.185251	6.66447	2.66206	0.102767	0.528912
Ube2q2	-0.184123	5.57936	2.658	0.10303	0.529577
Adat3	-0.46255	2.13012	2.65207	0.103415	0.530115
Dhx30	-0.133496	7.06768	2.64771	0.103699	0.530495
Rchy1	-0.204338	6.02357	2.64807	0.103676	0.530495
Cwc25	-0.175613	5.32726	2.6484	0.103654	0.530495
Abi3	-0.3433	3.94685	2.64566	0.103833	0.530722
Ctsk	-0.818775	0.200449	2.64626	0.103794	0.530722
Slc25a38	-0.217931	5.05722	2.63301	0.104663	0.531085
Mtmr3	-0.183336	7.64675	2.63322	0.104649	0.531085
Proz	-0.334505	2.65039	2.63354	0.104628	0.531085
Sars	-0.172857	7.8567	2.63531	0.104512	0.531085
Sdr42e1	-0.390267	1.91672	2.63889	0.104277	0.531085
Epc1	-0.149937	6.44323	2.63889	0.104276	0.531085
Champ1	-0.194904	5.99063	2.63919	0.104257	0.531085
Zfp740	-0.17334	7.58314	2.64029	0.104184	0.531085
Sgpl1	-0.183554	7.15006	2.64267	0.104029	0.531085
Cox10	-0.210717	4.62381	2.62828	0.104975	0.531761
Art5	-1.1591	-1.00994	2.62932	0.104907	0.531761
Urb2	-0.211461	5.52249	2.62989	0.104869	0.531761
Ahr	-0.358129	6.36346	2.62677	0.105075	0.53204
Anapc16	-0.173494	5.77028	2.61256	0.10602	0.535459
Slc4a7	-0.394059	6.61184	2.6087	0.106279	0.535468
Ankrd13a	-0.145529	8.00004	2.6093	0.106239	0.535468
Kdm5b	-0.31536	5.42143	2.5988	0.106945	0.53654
Trim26	-0.172082	7.47392	2.60046	0.106833	0.53654
Prdm2	-0.203262	7.5384	2.59636	0.107109	0.537081
Cept1	-0.164739	5.57399	2.58396	0.107952	0.539486
Klhl24	-0.242652	8.34076	2.58478	0.107895	0.539486
Ggt5	-0.75745	0.92648	2.58075	0.10817	0.539899
Rgs2	-0.364584	6.93055	2.57701	0.108426	0.540649
Dennd5b	-0.280608	6.49132	2.57719	0.108414	0.540649
Trappc10	-0.155366	6.72232	2.57253	0.108734	0.541346
Rnf122	-0.229518	5.55687	2.5693	0.108956	0.541545
Cdkn2aip	-0.215215	4.96352	2.56992	0.108913	0.541545
BC025920	-0.46097	1.21585	2.56288	0.109399	0.542046
Pik3cd	-0.156524	9.20937	2.5589	0.109675	0.542625
Rps24	-0.259409	10.6348	2.55634	0.109853	0.543055
Zfp36l1	-0.165749	8.73063	2.55663	0.109832	0.543055
Nek9	-0.207467	7.5976	2.55412	0.110007	0.543367
Atg4a	-0.20932	4.16858	2.54761	0.110461	0.54368
Zc3h10	-0.220133	5.4048	2.54796	0.110437	0.54368
Tmem106b	-0.235065	6.54268	2.54472	0.110663	0.544347
Zfp963	-0.39347	1.92349	2.54128	0.110905	0.545307
Phf1	-0.245244	7.02136	2.52971	0.111721	0.547059
1700102P08Rik	-0.592052	0.586092	2.52202	0.112267	0.548604
Gdpgp1	-0.245927	4.00902	2.52204	0.112265	0.548604
Junb	-0.207639	7.50789	2.52009	0.112404	0.548907
Aar2	-0.199757	5.00859	2.51861	0.11251	0.549031
Zyx	-0.235616	6.59232	2.51634	0.112672	0.549145
Fastkd2	-0.187089	4.85793	2.51348	0.112876	0.549775
A530032D15Rik	-0.323299	4.39451	2.50775	0.113288	0.550876
Zfp937	-0.512284	0.469663	2.50905	0.113194	0.550876
Prkci	-0.240982	5.32874	2.49285	0.114364	0.554073
Klf13	-0.204512	7.8807	2.48957	0.114603	0.554553
Map9	-0.406678	1.58898	2.48027	0.115282	0.556407
Stam2	-0.167705	5.02874	2.47295	0.11582	0.557305
Atxn7l3b	-0.149752	6.80515	2.47343	0.115785	0.557305
A130051J06Rik	-0.641099	0.395768	2.47354	0.115777	0.557305
Adat1	-0.219676	3.93235	2.47408	0.115737	0.557305
Rps15a	-0.24501	9.84739	2.46795	0.116189	0.558365
Dhx40	-0.208243	5.45624	2.46343	0.116524	0.558677
Fcrl5	-0.290439	4.36217	2.46358	0.116513	0.558677
Atraid	-0.203242	5.07623	2.4652	0.116393	0.558677
Sorbs1	-0.47747	2.37299	2.45098	0.117452	0.559236
Crebrf	-0.278016	6.89595	2.45141	0.117419	0.559236
Zbtb26	-0.362514	4.3288	2.45196	0.117378	0.559236
Eif1a	-0.187169	6.50614	2.45296	0.117303	0.559236
Marveld2	-0.333452	5.04586	2.45319	0.117286	0.559236
Dclk2	-0.257084	6.75425	2.45607	0.117072	0.559236
Ccr6	-0.41316	8.20078	2.4563	0.117054	0.559236
Nifk	-0.179982	5.95541	2.44502	0.117898	0.559793
Zfp951	-0.427017	2.66091	2.44611	0.117817	0.559793
Ccdc122	-0.689995	0.674089	2.44623	0.117808	0.559793
Mbtps2	-0.236564	4.90265	2.44733	0.117725	0.559793
Rala	-0.197297	5.14509	2.4401	0.118269	0.560657
Fam149b	-0.219372	6.20159	2.43513	0.118644	0.561203
Rbm18	-0.203198	4.85726	2.43781	0.118442	0.561203
Stat3	-0.198268	8.20782	2.42978	0.11905	0.56212
Zfp955a	-0.366954	2.90515	2.41219	0.120394	0.562878
Cmtr2	-0.297818	4.04585	2.41338	0.120303	0.562878
Cep170b	-0.23965	4.5394	2.41397	0.120257	0.562878
4933426M11Rik	-0.171148	7.08236	2.41432	0.12023	0.562878
Gch1	-0.285246	4.34366	2.41471	0.1202	0.562878
Trib2	-0.229978	6.24142	2.4171	0.120017	0.562878
Gpd2	-0.297432	5.83074	2.41736	0.119997	0.562878
Zswim1	-0.252266	4.11312	2.41764	0.119976	0.562878
Zhx1	-0.206937	5.96371	2.41779	0.119964	0.562878
Ing3	-0.171248	5.14525	2.42268	0.119591	0.562878
Gm8730	-0.170159	9.93431	2.42281	0.11958	0.562878
Rnf44	-0.164937	8.04115	2.40761	0.120746	0.563199
Pak1ip1	-0.155486	6.28988	2.40587	0.120881	0.563606
Rrad	-0.405583	3.12636	2.40501	0.120948	0.563696
Kcnc1	-0.853804	0.124191	2.39972	0.121357	0.564966
Fam167a	-0.279837	6.5232	2.39626	0.121626	0.565747
Ctns	-0.20015	4.87772	2.38861	0.122222	0.566529
Tmem55a	-0.24782	3.64001	2.38976	0.122132	0.566529
Disp1	-0.253407	4.0006	2.3898	0.12213	0.566529
Nek3	-0.330105	2.41501	2.38448	0.122546	0.567144
2021-09-15	-0.1447	7.12641	2.38545	0.12247	0.567144
Zxdb	-0.274742	4.01622	2.38316	0.122649	0.567182
Vma21	-0.215871	5.12962	2.3836	0.122615	0.567182
Inadl	-0.326953	4.90356	2.3803	0.122874	0.56756
Pnrc1	-0.229828	6.88123	2.37512	0.123282	0.56773
Pfkfb4	-0.219209	5.07781	2.37514	0.123281	0.56773
Rrm2b	-0.20579	5.29505	2.37537	0.123262	0.56773
Samd8	-0.248219	4.4511	2.37645	0.123178	0.56773
Tymp	-0.480675	0.922842	2.37314	0.123439	0.567743
Gm9774	-0.505879	0.88573	2.36611	0.123995	0.569202
Appl2	-0.240991	5.07981	2.36634	0.123977	0.569202
Smcr8	-0.269678	7.16668	2.35992	0.124488	0.570804
Kctd11	-0.300261	3.55628	2.35386	0.124973	0.571495
Ikbkg	-0.17584	6.3667	2.35443	0.124927	0.571495
Cdc14b	-0.270204	3.3811	2.35453	0.124919	0.571495
Spryd3	-0.189761	5.30038	2.35668	0.124747	0.571495
H2-Oa	-0.30245	6.48064	2.3496	0.125315	0.572169
Cul5	-0.206486	5.81966	2.34556	0.12564	0.572993
Gorasp2	-0.156893	6.93975	2.34157	0.125963	0.573584
Slc2a3	-0.227792	5.49662	2.34178	0.125946	0.573584
Xlr3b	-2.76241	2.43638	2.34185	0.12594	0.573584
Add3	-0.172548	8.73707	2.33798	0.126253	0.574027
Hdac10	-0.162722	6.65518	2.33811	0.126242	0.574027
Snrk	-0.208631	5.88722	2.3392	0.126154	0.574027
Rln3	-0.718621	-0.0899086	2.33587	0.126424	0.574391
Gng2	-0.188233	6.27069	2.33023	0.126883	0.575352
Dhx37	-0.170598	6.22869	2.33081	0.126836	0.575352
Hddc3	-0.393251	1.37044	2.32061	0.12767	0.576094
Fbxw11	-0.158741	6.4856	2.32074	0.12766	0.576094
Slc26a11	-0.304257	5.12506	2.32141	0.127605	0.576094
C78339	-0.227431	5.31049	2.31756	0.12792	0.576864
Strn3	-0.218542	5.20865	2.31247	0.12834	0.57799
Pura	-0.325847	5.38831	2.30864	0.128657	0.578541
Ccdc92	-0.483272	1.45975	2.3091	0.128619	0.578541
Nsa2	-0.227198	7.66278	2.30489	0.128967	0.579281
Phlpp1	-0.25814	6.76029	2.29209	0.130034	0.579696
Dyrk2	-0.195044	6.47958	2.29306	0.129953	0.579696
Ppcdc	-0.236743	6.45821	2.29727	0.129602	0.579696
Adpgk	-0.160527	6.61406	2.29753	0.12958	0.579696
Rpl18a	-0.219037	10.5601	2.29837	0.12951	0.579696
Myl12b	-0.336412	2.8801	2.29918	0.129443	0.579696
Nelfb	-0.129991	7.08588	2.29945	0.12942	0.579696
Nsmaf	-0.164343	6.96304	2.30185	0.12922	0.579696
Isca1	-0.204775	5.54344	2.30208	0.129201	0.579696
Ptchd1	-1.02524	-0.959272	2.29134	0.130098	0.57976
Trmt11	-0.235631	3.63945	2.28691	0.13047	0.580548
Ly6d	-0.268931	8.95992	2.28436	0.130684	0.581066
Ago4	-0.374265	3.9951	2.27842	0.131185	0.581774
Iqsec1	-0.153613	8.21255	2.27207	0.131724	0.582665
Gpc2	-0.430033	1.4363	2.26915	0.131973	0.582718
Zfyve20	-0.190589	5.36685	2.25578	0.133116	0.583055
Rnft2	-0.398265	0.914477	2.25728	0.132988	0.583055
Sufu	-0.200425	6.70561	2.25747	0.132971	0.583055
Mavs	-0.155411	5.8708	2.25872	0.132864	0.583055
Gabarapl2	-0.21049	5.3116	2.259	0.13284	0.583055
Rnaset2a	-0.570515	0.320375	2.25959	0.13279	0.583055
Eif4b	-0.164022	9.47762	2.26669	0.132182	0.583055
Pes1	-0.167727	7.45471	2.25487	0.133195	0.583076
Mta3	-0.170958	6.10543	2.24615	0.133947	0.584419
Znrd1	-0.192126	4.94412	2.24646	0.133921	0.584419
Inpp5e	-0.16458	5.55278	2.24667	0.133902	0.584419
Bin2	-0.177567	7.20747	2.24265	0.134251	0.585115
Serinc1	-0.165745	6.49052	2.24082	0.13441	0.585379
Exoc2	-0.175487	6.40356	2.23969	0.134508	0.585593
Stk24	-0.134903	7.92843	2.23673	0.134765	0.586109
Rsl1	-0.238246	4.11986	2.23755	0.134694	0.586109
Pde4d	-0.430607	2.47006	2.22282	0.135985	0.587079
Mbd5	-0.279498	4.6321	2.22553	0.135746	0.587079
Ppp1r15b	-0.175862	7.68601	2.22554	0.135745	0.587079
Nipal3	-0.183505	6.04358	2.22562	0.135738	0.587079
Zfp457	-0.690136	-0.243549	2.22623	0.135685	0.587079
Rsl24d1	-0.190319	5.87699	2.22923	0.135421	0.587079
Rsad1	-0.29925	4.38307	2.23348	0.135049	0.587079
Rps28	-0.227877	8.80151	2.22087	0.136156	0.587605
Nrros	-0.155215	7.82171	2.22028	0.136208	0.587618
Slc25a32	-0.220778	4.8912	2.21923	0.136301	0.587805
Tulp4	-0.222452	5.5282	2.2042	0.137636	0.58938
Oxr1	-0.191606	5.65636	2.20466	0.137594	0.58938
Prmt10	-0.183378	4.74617	2.20471	0.13759	0.58938
Tspan17	-0.448891	2.46471	2.20534	0.137534	0.58938
Gm16432	-0.823192	-0.703548	2.20204	0.137828	0.589688
Mospd2	-0.218796	4.66751	2.20236	0.1378	0.589688
Acly	-0.182173	8.60873	2.20142	0.137883	0.589711
Amz1	-0.373163	3.21877	2.18899	0.139001	0.59075
Rpsa-ps10	-0.320106	3.96347	2.18968	0.138938	0.59075
Hs3st3b1	-0.451646	1.56509	2.18978	0.138929	0.59075
Tnfrsf13c	-0.163642	8.8685	2.19072	0.138845	0.59075
Brwd1	-0.289113	7.39587	2.19269	0.138667	0.59075
Trappc9	-0.149826	5.58971	2.18468	0.13939	0.591857
Zfp12	-0.251881	5.4156	2.17984	0.139829	0.592492
Bcdin3d	-0.218585	4.14784	2.18036	0.139782	0.592492
Il10rb	-0.178626	6.07373	2.18106	0.139718	0.592492
Pdlim5	-0.230861	5.76234	2.18175	0.139656	0.592492
Stap1	-0.171865	7.90306	2.17413	0.140349	0.593518
Cd164	-0.15201	8.00645	2.16843	0.14087	0.594996
Gimap4	-0.201399	7.81884	2.16236	0.141427	0.595376
Map3k14	-0.17258	6.26704	2.1628	0.141387	0.595376
Ccm2	-0.182528	7.33928	2.16461	0.14122	0.595376
Tmem57	-0.152966	5.79183	2.16468	0.141214	0.595376
Rgs3	-0.218882	4.71772	2.1662	0.141075	0.595376
Rraga	-0.164549	6.6955	2.15947	0.141693	0.596144
Pcif1	-0.132873	7.11742	2.15833	0.141799	0.596378
Cnbd2	-0.579513	3.76391	2.15447	0.142156	0.597244
Cnn3	-0.183221	7.25423	2.14141	0.14337	0.597726
Cd244	-0.486607	2.40398	2.14533	0.143005	0.597726
Thra	-0.286282	3.7148	2.14609	0.142933	0.597726
Ubl3	-0.138461	7.04482	2.15082	0.142494	0.597726
Eps8l1	-0.953183	6.08748	2.15144	0.142436	0.597726
1110057K04Rik	-0.158672	5.43239	2.13554	0.14392	0.599153
Il21r	-0.136157	8.2747	2.13112	0.144335	0.600249
Zfp51	-0.280222	4.10005	2.12817	0.144613	0.60078
Parp1	-0.16472	9.36761	2.12751	0.144676	0.60083
Zkscan6	-0.18374	4.41574	2.12528	0.144886	0.601072
Cep120	-0.197033	6.36058	2.11882	0.145499	0.602773
Llgl1	-0.146559	6.21068	2.1176	0.145614	0.602832
Sidt1	-0.271214	3.95007	2.11232	0.146117	0.603938
Zfand6	-0.140191	6.5059	2.11091	0.146252	0.604211
Zfp78	-0.351454	1.78578	2.1098	0.146358	0.604417
Ptplad1	-0.167823	5.43795	2.10827	0.146505	0.604626
Ist1	-0.130429	7.21291	2.10581	0.146741	0.60509
Hmg20a	-0.175775	6.27201	2.10235	0.147073	0.605501
Slc39a6	-0.21229	4.87637	2.10238	0.14707	0.605501
Mycbp2	-0.301534	8.65685	2.09949	0.147348	0.606004
Alyref2	-0.362569	2.22191	2.09826	0.147467	0.606282
Mettl13	-0.200921	5.25394	2.09753	0.147537	0.606362
Ap1g1	-0.167786	6.91234	2.09497	0.147785	0.606958
Tcea1	-0.173412	6.74105	2.09207	0.148065	0.607901
Hmha1	-0.194222	10.3335	2.08944	0.148321	0.60874
Ryr3	-0.782307	-0.407896	2.08801	0.148459	0.609098
Tmem19	-0.14749	5.45778	2.07541	0.14969	0.610068
Stat4	-0.227997	5.78459	2.07815	0.149421	0.610068
E2f5	-0.268646	3.76107	2.07839	0.149398	0.610068
Ngly1	-0.166832	4.98232	2.08027	0.149214	0.610068
Zfp605	-2.56041	2.16011	2.0808	0.149162	0.610068
Kansl1	-0.185162	7.55021	2.08196	0.149049	0.610068
Abhd2	-0.175929	6.32672	2.08321	0.148927	0.610068
Erlin2	-0.19535	5.71353	2.08339	0.14891	0.610068
Pbxip1	-0.141606	8.03334	2.084	0.14885	0.610068
Praf2	-0.280337	3.17653	2.07271	0.149955	0.610184
Maf1	-0.152714	7.42213	2.06794	0.150425	0.610906
Parm1	-1.10135	-0.504093	2.0697	0.150251	0.610906
Crygn	-0.681626	-0.16703	2.05793	0.151416	0.612355
Prdm9	-0.18864	4.7293	2.05987	0.151223	0.612355
Slc25a37	-0.229237	7.90844	2.0615	0.151061	0.612355
Abi1	-0.161338	7.17146	2.05574	0.151634	0.613029
Jmy	-0.298432	4.67707	2.05325	0.151882	0.613615
Sde2	-0.166056	6.06784	2.04313	0.152894	0.614038
Zfp599	-0.372142	2.08306	2.04455	0.152752	0.614038
Rps10-ps1	-0.571378	0.243012	2.04548	0.152659	0.614038
Camk4	-0.464456	1.11147	2.04721	0.152485	0.614038
Wdr82	-0.162378	7.39511	2.04876	0.15233	0.614038
B3gnt7	-0.302902	5.40669	2.0495	0.152256	0.614038
Pus7	-0.224155	5.77099	2.05018	0.152188	0.614038
Rnf130	-0.170071	6.39797	2.04136	0.153073	0.614254
Mst1	-0.45674	2.18522	2.03739	0.153473	0.614816
Ms4a4a	-0.37781	3.55335	2.03271	0.153946	0.615267
Orm2	-0.65777	0.890172	2.02472	0.154757	0.617056
Usp42	-0.182362	5.7664	2.02539	0.154689	0.617056
Tab3	-0.239346	4.68605	2.02688	0.154537	0.617056
Smim15	-0.145441	5.5141	2.02251	0.154983	0.61708
Lpcat1	-0.186136	6.52872	2.02314	0.154919	0.61708
Tmed4	-0.173935	5.37512	2.0238	0.154851	0.61708
Pdlim3	-1.46578	-1.34386	2.01995	0.155244	0.617713
Pak2	-0.163733	7.79651	2.01836	0.155407	0.617992
Fem1c	-0.184303	6.02596	2.01302	0.155954	0.618459
Mob1a	-0.172731	8.62046	2.01393	0.155861	0.618459
Arl4d	-0.465476	0.66204	2.01506	0.155745	0.618459
Dusp4	-0.293101	7.25454	2.01536	0.155715	0.618459
Tlr6	-0.278195	3.18911	2.01647	0.1556	0.618459
Gm14305	-0.339887	2.08628	2.0053	0.15675	0.620841
Rab18	-0.165571	6.03563	2.00268	0.157021	0.62093
Mia3	-0.134247	6.84478	2.00096	0.157199	0.621157
Prkx	-0.209959	5.51864	1.99776	0.157531	0.621659
Pctp	-0.218118	3.52797	1.99646	0.157667	0.621781
1110001J03Rik	-0.251297	3.69023	1.99414	0.157909	0.621909
Grk6	-0.125983	8.72504	1.99302	0.158026	0.621959
Osbpl9	-0.149814	7.43284	1.99342	0.157984	0.621959
Rnf167	-0.165951	7.28967	1.98543	0.15882	0.62279
Slc39a7	-0.267283	3.53079	1.98592	0.158769	0.62279
Pih1d2	-0.894476	-0.83237	1.98605	0.158754	0.62279
Atad1	-0.176556	6.59241	1.98612	0.158747	0.62279
Cln5	-0.165547	5.72706	1.98742	0.158611	0.62279
Gm10093	-0.37839	1.47946	1.98905	0.15844	0.62279
Atg9b	-0.67527	-0.724281	1.98943	0.158401	0.62279
Foxk1	-0.211599	7.43485	1.98447	0.158921	0.622801
Xlr4b	-0.300013	4.16593	1.9834	0.159032	0.622817
Abhd15	-0.999553	0.120974	1.97785	0.159617	0.623067
Tbc1d22a	-0.164698	5.46511	1.97888	0.159509	0.623067
Tnk2	-0.119937	6.99255	1.97992	0.159399	0.623067
Fbxo40	-0.554659	-0.140102	1.97716	0.15969	0.623147
Ms4a6c	-0.229645	6.0372	1.97234	0.1602	0.623704
Pik3r3	-0.418079	1.19525	1.97281	0.16015	0.623704
Usp38	-0.130163	6.55984	1.97303	0.160126	0.623704
Pkd1l1	-2.14436	0.102567	1.97358	0.160069	0.623704
Icmt	-0.12557	6.3813	1.97155	0.160284	0.623827
Spty2d1	-0.240691	5.98718	1.96821	0.160638	0.624186
D17Wsu92e	-0.137108	7.36065	1.9633	0.16116	0.625217
Med13	-0.262227	8.36726	1.96215	0.161283	0.625261
Tle6	-0.577327	-0.0471883	1.95942	0.161575	0.625266
Pttg1	-0.246127	4.09337	1.95961	0.161555	0.625266
Tnfsf10	-0.33256	2.44032	1.95976	0.161539	0.625266
Gm10094	-0.417018	1.01692	1.95992	0.161521	0.625266
Lrrc71	-1.09331	-0.957756	1.95796	0.161731	0.625368
Pex3	-0.203909	4.14236	1.95744	0.161787	0.625381
Terf2ip	-0.176538	5.01669	1.95516	0.162032	0.625718
Ccar2	-0.107348	7.16287	1.95377	0.162181	0.625886
Fuca1	-0.183147	6.79287	1.95299	0.162265	0.626005
Mterf3	-0.158296	5.44575	1.9517	0.162403	0.626338
Rpl7a	-0.158893	10.1394	1.94901	0.162694	0.626505
Nat10	-0.158851	6.86564	1.94935	0.162657	0.626505
Armc9	-0.301666	5.03246	1.95055	0.162528	0.626505
Rnf113a1	-0.27707	2.69618	1.94573	0.163048	0.626589
Dtd1	-0.235378	4.42535	1.94584	0.163036	0.626589
Tmub1	-0.221504	4.60253	1.94653	0.162961	0.626589
Tut1	-0.163592	6.27738	1.94731	0.162877	0.626589
Phkg1	-0.71407	-0.619217	1.9427	0.163376	0.626635
Srcap	-0.371137	3.51659	1.9434	0.1633	0.626635
Dram2	-0.198769	4.46379	1.94373	0.163264	0.626635
Slc30a9	-0.164129	6.07561	1.94443	0.163189	0.626635
Fam63a	-0.175654	5.50235	1.9451	0.163116	0.626635
Psd4	-0.11123	7.93185	1.93419	0.164301	0.626783
Dgka	-0.196139	7.99048	1.93466	0.16425	0.626783
Abhd14a	-0.250898	3.42018	1.93483	0.164231	0.626783
Ift43	-0.734966	1.15041	1.93502	0.164211	0.626783
Rpl37a	-0.249482	9.77608	1.93641	0.164058	0.626783
Tmem222	-0.168422	5.16187	1.93862	0.163819	0.626783
Ccdc47	-0.181532	6.62332	1.9403	0.163636	0.626783
Rnf185	-0.164547	5.00842	1.93138	0.164607	0.62712
Sele	-0.667093	0.807971	1.93173	0.164569	0.62712
Klhl20	-0.164333	5.75273	1.92607	0.165189	0.628193
Pik3ca	-0.156677	6.93705	1.92652	0.16514	0.628193
Fmnl3	-0.147703	7.25354	1.92528	0.165276	0.628249
Ctnnd1	-0.536764	0.192641	1.92284	0.165544	0.628479
Scpep1	-0.151498	6.76567	1.91885	0.165984	0.629621
Klc4	-0.176539	5.04336	1.91653	0.166239	0.629698
Zfp120	-0.225973	5.08471	1.91402	0.166517	0.630348
Zbtb22	-0.169275	6.02275	1.91329	0.166598	0.630453
Ldha	-0.135891	9.37488	1.91212	0.166728	0.630544
Pip4k2a	-0.1481	6.52355	1.91237	0.1667	0.630544
Ubxn6	-0.197997	4.315	1.90855	0.167124	0.630839
Rpl32	-0.191869	10.0487	1.9087	0.167108	0.630839
Bcl11a	-0.1809	7.94549	1.90945	0.167025	0.630839
Mettl23	-0.19378	5.59943	1.9099	0.166974	0.630839
Mios	-0.176288	5.29719	1.90478	0.167544	0.632024
Pcf11	-0.203072	7.35574	1.8983	0.168269	0.632369
Zfp747	-0.219572	4.25435	1.89944	0.168141	0.632369
AU022252	-0.199536	4.3282	1.90157	0.167903	0.632369
Tmlhe	-0.409756	0.978622	1.90173	0.167885	0.632369
Zfp609	-0.231635	5.05953	1.89694	0.168421	0.632524
Edc4	-0.122827	7.15661	1.89551	0.168582	0.632527
Tmem241	-0.245865	3.45068	1.89061	0.169133	0.633199
Bpnt1	-0.223586	4.50249	1.88934	0.169276	0.633535
6030468B19Rik	-0.404603	2.44857	1.8829	0.170004	0.634861
Tpd52	-0.119548	6.74733	1.88112	0.170207	0.635019
2310047M10Rik	-0.227051	4.09624	1.87929	0.170415	0.635595
Xylt1	-0.285285	7.26143	1.87729	0.170642	0.636044
Cog6	-0.160324	5.19947	1.8734	0.171086	0.636282
Nfxl1	-0.200247	4.15505	1.87359	0.171064	0.636282
Sesn3	-0.249305	7.53405	1.87419	0.170995	0.636282
Pign	-0.237248	5.36185	1.87428	0.170986	0.636282
Serpini1	-0.253873	4.09183	1.87518	0.170883	0.636282
9030617O03Rik	-0.249348	3.25328	1.85981	0.172647	0.637522
Btnl1	-0.586329	0.539417	1.86008	0.172615	0.637522
Naaa	-0.178218	4.84802	1.86022	0.172599	0.637522
Smad4	-0.170565	6.17323	1.86105	0.172504	0.637522
Zfp646	-0.158721	7.37909	1.86123	0.172483	0.637522
P2rx5	-0.727154	-0.473207	1.86196	0.172398	0.637522
Stard10	-0.276966	4.80067	1.86289	0.172292	0.637522
Lpin1	-0.25952	4.47317	1.86354	0.172217	0.637522
Wdr43	-0.152861	7.24952	1.8636	0.17221	0.637522
Zfp672	-0.143884	4.91578	1.86597	0.171938	0.637522
Rpl27a	-0.150608	10.083	1.85665	0.173012	0.638674
Snn	-0.145737	9.91662	1.85376	0.173347	0.638785
Zfp592	-0.120649	7.59521	1.85544	0.173152	0.638785
Echs1	-0.154568	5.43079	1.85171	0.173584	0.638803
Mau2	-0.118789	7.51377	1.85199	0.173552	0.638803
Rps6	-0.151571	10.2774	1.85227	0.173519	0.638803
Galnt4	-0.249354	5.04852	1.85095	0.173672	0.63893
Exoc8	-0.20231	4.92428	1.84474	0.174397	0.639222
Dtwd1	-0.289351	3.28908	1.84506	0.174359	0.639222
Zfp69	-0.268087	3.18479	1.84607	0.174242	0.639222
Dnmt3b	-0.224973	4.02433	1.84638	0.174205	0.639222
3110040N11Rik	-0.228404	4.11107	1.84855	0.173952	0.639222
Zfp780b	-0.20628	4.08994	1.84409	0.174472	0.639301
Setd4	-0.205089	4.12546	1.83594	0.175428	0.639334
2610002M06Rik	-0.171584	4.91914	1.83698	0.175305	0.639334
Usp36	-0.193345	6.77056	1.83721	0.175278	0.639334
Mkks	-0.289986	2.38253	1.83914	0.175052	0.639334
Lipo1	-0.206755	3.57858	1.84128	0.174801	0.639334
Zfp235	-0.233606	3.50648	1.83447	0.1756	0.639494
Rps4l	-0.367009	2.22342	1.82719	0.17646	0.641252
Tmsb4x	-0.176278	11.0849	1.82081	0.177216	0.642822
Icam2	-0.199312	6.26506	1.82137	0.17715	0.642822
Arfgef1	-0.220465	7.71591	1.82212	0.177062	0.642822
Gtf3c6	-0.201309	5.37788	1.82236	0.177032	0.642822
Tmem123	-0.200932	8.7928	1.81864	0.177475	0.643335
Gpi1	-0.111974	8.82528	1.81714	0.177654	0.643623
Vegfa	-0.518005	4.72167	1.81607	0.177782	0.643893
Csrnp2	-0.25535	2.75889	1.8129	0.178161	0.644087
Tgm1	-0.793736	-0.627086	1.81305	0.178143	0.644087
Csnk1g1	-0.213971	5.94527	1.80786	0.178765	0.645399
Chrnb2	-0.234359	3.30594	1.80809	0.178738	0.645399
Itsn2	-0.166918	8.37729	1.80875	0.178658	0.645399
Tbck	-0.200716	4.73645	1.80336	0.179307	0.646656
Golph3	-0.132279	6.4816	1.80287	0.179366	0.646674
Cyb5d1	-0.195142	4.35384	1.80166	0.179511	0.647003
Nudt15	-0.217812	3.60239	1.79371	0.180475	0.649098
Erp27	-0.429397	2.37305	1.7944	0.18039	0.649098
Mfsd4	-0.322508	6.28913	1.79163	0.180728	0.649522
Susd1	-0.218663	6.25697	1.78835	0.181128	0.650463
Sepw1	-0.237476	6.70043	1.7861	0.181401	0.651018
Ikzf3	-0.217234	8.93814	1.7837	0.181695	0.651662
Rps26	-0.15941	10.0657	1.77892	0.182282	0.652639
Wwc2	-0.286806	2.64494	1.77906	0.182264	0.652639
Gse1	-0.269548	6.1736	1.77653	0.182576	0.652707
Sirt1	-0.178617	5.77161	1.77668	0.182557	0.652707
Sh3bgrl	-0.166318	7.29799	1.77721	0.182492	0.652707
Socs3	-0.308447	3.92217	1.77541	0.182714	0.65285
Actr3	-0.119391	9.57	1.76763	0.183675	0.655456
Setmar	-0.367742	1.67779	1.76598	0.18388	0.655989
Cat	-0.146201	7.02296	1.76282	0.184273	0.656212
Snapin	-0.150649	5.74765	1.76088	0.184515	0.656679
Ice2	-0.190379	5.61491	1.75824	0.184845	0.65687
Dusp12	-0.256506	3.38018	1.75998	0.184627	0.65687
Rdh14	-0.206467	3.97505	1.75631	0.185085	0.656939
Rbpjl	-0.611847	1.47391	1.75737	0.184953	0.656939
1700030K09Rik	-0.185399	4.43463	1.75229	0.185589	0.658137
Mmachc	-0.197836	4.19328	1.75007	0.185868	0.658148
Zrsr1	-0.262752	4.33436	1.75044	0.185822	0.658148
Fbxw9	-0.225366	3.71415	1.75133	0.18571	0.658148
Slc12a6	-0.155356	8.06008	1.75137	0.185704	0.658148
Lurap1	-0.341653	1.75851	1.74706	0.186247	0.658703
Ttc7	-0.126928	7.55997	1.74717	0.186232	0.658703
Mterf1b	-0.328844	2.0129	1.74564	0.186426	0.65875
Gpr174	-0.273702	6.94663	1.7435	0.186697	0.65951
Znrf2	-0.196115	6.99376	1.74002	0.187136	0.659856
Tbc1d20	-0.120004	7.05479	1.7403	0.1871	0.659856
Tmem127	-0.104464	7.03341	1.73801	0.187392	0.660224
Bbs9	-0.256448	4.0347	1.734	0.187901	0.660428
Msl2	-0.210014	7.28733	1.73432	0.18786	0.660428
Mettl1	-0.199926	5.64767	1.73436	0.187855	0.660428
Polg2	-0.195028	4.31534	1.73441	0.187849	0.660428
Tes	-0.131172	5.74729	1.73533	0.187732	0.660428
Coa5	-0.175188	7.14978	1.73012	0.188396	0.660803
Lrrc47	-0.181511	6.32565	1.73092	0.188293	0.660803
Cnbp	-0.142468	9.10132	1.72801	0.188666	0.661358
Pwp1	-0.156396	5.89541	1.7262	0.188897	0.661975
Plcxd1	-2.10122	1.69726	1.72347	0.189246	0.662418
Tesk1	-0.18639	5.32526	1.72387	0.189196	0.662418
Dok4	-0.387499	1.50575	1.72185	0.189456	0.662788
Smarca2	-0.211484	6.44514	1.71809	0.189939	0.663864
Aktip	-0.193734	4.28067	1.7182	0.189925	0.663864
Lcp1	-0.114154	10.3837	1.71074	0.190889	0.663869
Tgif1	-0.180007	7.19118	1.71345	0.190538	0.663869
Hdhd3	-0.439461	0.666239	1.71383	0.190489	0.663869
Mapkapk5	-0.285142	2.60467	1.71488	0.190353	0.663869
Nnat	-0.649009	0.534339	1.71523	0.190308	0.663869
Rbbp9	-0.260339	3.40356	1.71647	0.190148	0.663869
BC030336	-0.166882	4.93024	1.6927	0.193246	0.668546
Gbp9	-0.309478	6.64781	1.69401	0.193073	0.668546
AI987944	-0.172625	4.76189	1.69169	0.193379	0.668812
Ctdsp1	-0.132112	7.61388	1.69015	0.193581	0.669122
Fcgr2b	-0.125035	7.29596	1.68655	0.194056	0.66921
Lrch1	-0.12639	5.97609	1.68677	0.194027	0.66921
Prkrir	-0.187386	6.58599	1.68758	0.193921	0.66921
Atrn	-0.162954	5.37102	1.68823	0.193835	0.66921
Filip1l	-0.233866	7.86567	1.68918	0.193709	0.66921
Cyp20a1	-0.185637	4.63341	1.68607	0.194119	0.669234
Ccnc	-0.164004	5.09079	1.68446	0.194333	0.669467
Ufl1	-0.140919	5.44566	1.68243	0.194602	0.669954
St8sia4	-0.221229	6.91853	1.67498	0.195593	0.670719
Nelfa	-0.127521	6.01109	1.67561	0.195509	0.670719
Xrn2	-0.141717	7.81704	1.67799	0.195191	0.670719
Pan3	-0.200415	7.28749	1.67981	0.19495	0.670719
Igkv4-62	-0.764377	-0.192583	1.66979	0.196287	0.672225
Tax1bp1	-0.131423	7.93392	1.6702	0.196232	0.672225
Pwp2	-0.183325	6.34371	1.66653	0.196724	0.672961
Rnf11	-0.16623	4.94933	1.6675	0.196594	0.672961
Smpd1	-0.204113	4.87607	1.66249	0.197267	0.673265
Acss2	-0.298631	3.25607	1.66256	0.197258	0.673265
Tmx3	-0.201481	6.36436	1.66377	0.197095	0.673265
Chfr	-2.54981	5.59812	1.66379	0.197093	0.673265
Lgals8	-0.142284	6.4448	1.66127	0.197432	0.67343
Rps16	-0.162547	10.3301	1.6581	0.19786	0.674292
Ikzf4	-0.663143	-0.390886	1.65331	0.198509	0.674591
Smurf2	-0.195788	5.79378	1.65333	0.198506	0.674591
Gm14295	-0.354824	2.07329	1.65074	0.198858	0.675196
Gde1	-0.135606	5.1063	1.64992	0.19897	0.675387
Fastkd1	-0.221227	4.64368	1.64636	0.199456	0.675684
Churc1	-0.249703	3.49767	1.64672	0.199406	0.675684
Mknk1	-0.148182	5.95483	1.64687	0.199386	0.675684
Paip1	-0.1416	5.74498	1.64823	0.1992	0.675684
Gna13	-0.198983	7.747	1.64833	0.199186	0.675684
Dcaf11	-0.115237	7.1416	1.64229	0.200012	0.676038
Cbll1	-0.183901	4.64975	1.64294	0.199922	0.676038
Dcp1a	-0.138811	6.48748	1.64316	0.199892	0.676038
Ttc37	-0.220879	5.67805	1.64416	0.199755	0.676038
Dennd4a	-0.241123	7.54532	1.64101	0.200187	0.676234
Hic2	-0.308678	1.86277	1.64009	0.200314	0.676471
Kcna3	-0.607181	5.39639	1.63903	0.200459	0.676577
1700017B05Rik	-0.159655	6.30979	1.63838	0.200548	0.676647
Nup153	-0.195554	7.81228	1.63564	0.200925	0.677188
Oxsr1	-0.121231	6.33065	1.63423	0.201119	0.677223
Atp6v0a2	-0.154361	6.02087	1.63192	0.201438	0.677767
Cetn2	-0.185029	5.25337	1.62289	0.20269	0.679096
Hint3	-0.200576	3.96147	1.62406	0.202527	0.679096
Uso1	-0.135654	6.55045	1.62435	0.202486	0.679096
Fam46a	-0.223552	5.38892	1.62743	0.202059	0.679096
2021-03-02	-0.183641	5.9528	1.62036	0.203042	0.679894
Isy1	-0.166855	5.65131	1.61353	0.203997	0.680982
Lax1	-0.195361	7.67785	1.61441	0.203872	0.680982
Gpbp1	-0.13041	6.92666	1.61498	0.203793	0.680982
Fam213a	-0.205029	6.15421	1.61529	0.20375	0.680982
Ppp1r3f	-0.379687	1.46326	1.6161	0.203637	0.680982
Klf2	-0.26988	8.21996	1.61255	0.204134	0.681058
Ccdc28a	-0.207286	4.1323	1.61144	0.20429	0.681385
Rab3gap1	-0.143583	6.75177	1.61103	0.204347	0.681385
Med13l	-0.219135	6.78968	1.60805	0.204766	0.681802
Zfp800	-0.209507	5.53997	1.60545	0.205133	0.682093
Ctage5	-0.153378	6.80878	1.60185	0.205641	0.682318
Npl	-0.965081	-1.0052	1.60202	0.205618	0.682318
Ogfod1	-0.154424	5.48286	1.59983	0.205928	0.682448
Bace1	-0.276629	3.49826	1.598	0.206187	0.682738
Cyp4f18	-0.266946	6.54594	1.59046	0.20726	0.68317
Gm10053	-0.430937	0.177283	1.59118	0.207157	0.68317
Pdk1	-0.309024	6.13643	1.592	0.207041	0.68317
Reep3	-0.158894	6.58422	1.59239	0.206985	0.68317
Rab6a	-0.111551	6.03988	1.5929	0.206913	0.68317
Zfp773	-0.28737	2.74732	1.59596	0.206477	0.68317
Nars2	-0.195532	3.43365	1.58271	0.208371	0.685061
Mkrn2	-0.158626	4.44469	1.58337	0.208276	0.685061
Nr1d2	-0.425106	5.01433	1.58127	0.208578	0.685196
Smim7	-0.133377	5.9533	1.58011	0.208745	0.685308
Gpkow	-0.13842	6.14838	1.57436	0.209575	0.686125
Exosc4	-0.205133	4.8304	1.57473	0.209521	0.686125
Lrpprc	-0.162535	6.7995	1.57493	0.209492	0.686125
Tmem55b	-0.119822	7.04265	1.57638	0.209283	0.686125
Akap10	-0.156171	5.85711	1.57656	0.209257	0.686125
Rab7	-0.111165	7.91165	1.57255	0.209837	0.686226
Mrpl19	-0.141431	5.28773	1.5726	0.20983	0.686226
Cfap43	-0.126188	6.2717	1.57213	0.209898	0.686235
Rdh12	-0.243468	4.90515	1.5708	0.210091	0.686629
L1cam	-0.36009	3.43517	1.57	0.210207	0.686679
Ralgapb	-0.176205	6.91067	1.56915	0.210331	0.686708
Lpar6	-0.245284	3.61112	1.56949	0.210281	0.686708
Casp2	-0.162527	7.06548	1.56765	0.210549	0.687229
Taf4b	-0.283896	4.17123	1.56406	0.211071	0.687803
Alg11	-0.193441	4.43199	1.56248	0.211303	0.688181
Mgat1	-0.112835	7.8866	1.56052	0.21159	0.688549
Primpol	-0.174795	4.69878	1.5577	0.212002	0.688949
Rnf111	-0.178308	6.98222	1.5563	0.212208	0.68924
1600012H06Rik	-0.15429	5.1222	1.55494	0.212408	0.689702
Tmsb10	-0.17336	9.15061	1.55281	0.212721	0.689966
Alpk2	-0.381256	1.47746	1.55118	0.212961	0.68999
Samhd1	-0.165935	9.24454	1.55184	0.212864	0.68999
Ralgds	-0.182042	5.17406	1.55202	0.212837	0.68999
Rapgef5	-0.220036	3.98768	1.54725	0.213541	0.691119
Pum1	-0.173341	7.12828	1.54751	0.213504	0.691119
Slc25a36	-0.196863	6.40914	1.54793	0.213441	0.691119
Kmt2e	-0.241737	8.13806	1.54836	0.213378	0.691119
Ccng1	-0.11984	6.42924	1.53677	0.215099	0.691271
Phf7	-0.141779	4.70998	1.53695	0.215073	0.691271
Dbndd1	-0.413199	1.07973	1.5375	0.21499	0.691271
Tmem138	-0.177512	4.02509	1.5381	0.2149	0.691271
Clpx	-0.150355	5.34098	1.53914	0.214746	0.691271
Grb2	-0.126096	9.13866	1.53963	0.214672	0.691271
Ndufaf1	-0.159478	4.40693	1.54053	0.214539	0.691271
Ankrd44	-0.199857	7.50298	1.54082	0.214496	0.691271
Slc14a1	-0.184804	4.70884	1.54111	0.214452	0.691271
Gpr137c	-0.312071	3.54479	1.54183	0.214345	0.691271
Rngtt	-0.171919	5.08973	1.542	0.214321	0.691271
Arf4	-0.11817	7.03379	1.54442	0.213961	0.691271
Csde1	-0.109941	8.50273	1.54564	0.213781	0.691271
Foxn3	-0.175633	7.69028	1.53545	0.215296	0.69153
Sdc1	-0.238883	5.9888	1.53445	0.215446	0.691715
Gpatch2l	-0.155251	5.61235	1.53144	0.215897	0.691777
Pla2g12a	-0.19522	3.9766	1.53168	0.21586	0.691777
Plk2	-0.291114	4.59349	1.53171	0.215856	0.691777
Pten	-0.143392	7.72777	1.52846	0.216344	0.692276
Notch2	-0.264647	8.30739	1.51824	0.217885	0.692331
Zbtb4	-0.212191	6.55652	1.51851	0.217845	0.692331
Fam174a	-0.163403	4.8826	1.51879	0.217802	0.692331
Sdad1	-0.185175	6.81547	1.52038	0.217562	0.692331
Ccdc126	-0.343684	2.08065	1.52043	0.217555	0.692331
St6galnac4	-0.162549	6.64203	1.52055	0.217536	0.692331
Dr1	-0.174563	6.59725	1.52208	0.217306	0.692331
Mturn	-0.229087	4.58347	1.52225	0.21728	0.692331
Atg12	-0.127491	5.38844	1.52234	0.217266	0.692331
Ddx31	-0.155575	4.56725	1.52271	0.217209	0.692331
Acvr1b	-0.135367	6.0061	1.52297	0.217171	0.692331
Chd2	-0.191398	7.64377	1.52394	0.217024	0.692331
Hpgds	-0.314708	4.73991	1.52704	0.216557	0.692331
Minpp1	-0.140175	5.44522	1.52748	0.216492	0.692331
Ccdc62	-0.325202	1.87644	1.51368	0.218578	0.692531
Ddx5	-0.127388	11.4078	1.51383	0.218556	0.692531
Atg14	-0.198968	3.91304	1.51421	0.218498	0.692531
Magi3	-0.244785	3.30212	1.51437	0.218474	0.692531
Ipcef1	-0.223724	4.5306	1.51649	0.218151	0.692531
Zfp759	-0.245515	2.72026	1.51245	0.218765	0.692772
Rpl9	-0.170122	10.2646	1.51026	0.219099	0.693074
Ext2	-0.120187	5.54186	1.50924	0.219255	0.693199
Eno1	-0.183783	9.30117	1.50864	0.219347	0.693306
Parg	-0.153436	6.04774	1.50669	0.219645	0.69351
Adam23	-0.477928	1.00903	1.50697	0.219603	0.69351
Tmem8b	-0.250912	3.15783	1.50743	0.219532	0.69351
Apbb1	-0.305584	2.29201	1.50595	0.219758	0.693683
Wdr37	-0.147625	5.64441	1.50458	0.219968	0.693979
Mtpn	-0.131776	8.33046	1.50266	0.220262	0.693987
Kdm4b	-0.156716	6.36871	1.50293	0.220221	0.693987
Ccdc71l	-0.159292	5.68919	1.50381	0.220086	0.693987
Rnf6	-0.161838	5.77604	1.50196	0.220371	0.694144
Phactr4	-0.18629	5.25064	1.50039	0.220612	0.694189
Tatdn2	-0.111067	6.69637	1.50054	0.220588	0.694189
Mical1	-0.153262	7.31461	1.49381	0.221626	0.694824
Sptbn5	-0.497932	0.7511	1.49383	0.221623	0.694824
Yipf6	-0.201334	5.19276	1.49385	0.22162	0.694824
Lekr1	-0.304714	1.22233	1.49406	0.221587	0.694824
Rpl4	-0.154077	11.5018	1.4942	0.221565	0.694824
Cdk9	-0.10971	7.64305	1.49327	0.221709	0.694864
Ppt1	-0.144082	6.39314	1.49247	0.221834	0.69489
Fam210a	-0.221779	5.35328	1.49126	0.222021	0.695016
Map2k1	-0.138083	7.08808	1.4906	0.222123	0.695061
Ube3c	-0.141662	5.99971	1.48033	0.223722	0.695768
Lbr	-0.152293	7.67361	1.4815	0.22354	0.695768
Nr3c1	-0.190212	7.35248	1.48192	0.223475	0.695768
Zfp276	-0.130957	5.40969	1.48238	0.223402	0.695768
Tmem30a	-0.15645	6.89321	1.48343	0.223238	0.695768
Sprtn	-0.163369	5.65468	1.48356	0.223218	0.695768
Apba3	-0.140676	5.34709	1.48497	0.222999	0.695768
Slamf1	-0.240495	3.84167	1.48552	0.222913	0.695768
Wdfy4	-0.159761	9.52164	1.48612	0.222819	0.695768
Gm10036	-0.323003	1.52366	1.47929	0.223886	0.69582
Prom1	-1.18849	-0.87321	1.47816	0.224063	0.696005
Cd2ap	-0.20708	7.14185	1.47485	0.224581	0.697252
Usp16	-0.125534	6.1998	1.47207	0.225019	0.697338
Rpl12	-0.166185	10.6014	1.47219	0.225	0.697338
Vipr1	-0.73224	-0.112556	1.47255	0.224944	0.697338
Fbxl4	-0.184852	4.01278	1.47258	0.224939	0.697338
Gabbr1	-0.263137	6.08471	1.47261	0.224934	0.697338
Ppfibp2	-0.188267	4.36799	1.47261	0.224934	0.697338
Atf1	-0.15603	6.43021	1.46979	0.225378	0.697722
Fam179b	-0.208642	5.6676	1.46747	0.225745	0.697747
Heca	-0.165112	6.65601	1.4679	0.225678	0.697747
Rheb	-0.129651	5.79861	1.46862	0.225563	0.697747
Rcan3	-0.179427	4.08079	1.46664	0.225877	0.697813
Trib3	-0.453471	3.52408	1.46587	0.225999	0.697827
Cxxc5	-0.148158	6.82231	1.465	0.226137	0.698072
Itfg3	-0.228685	4.07109	1.46249	0.226535	0.698756
C330013J21Rik	-0.577781	-0.379685	1.46252	0.22653	0.698756
Fbxo38	-0.128171	6.60848	1.46256	0.226524	0.698756
Noxo1	-0.481449	0.690656	1.46048	0.226853	0.699375
Azi2	-0.137286	6.09648	1.45754	0.227321	0.699389
Bbs10	-0.265911	2.28863	1.4587	0.227137	0.699389
Ms4a6b	-0.223508	4.63962	1.45925	0.227049	0.699389
4930522L14Rik	-2.07906	2.01976	1.45079	0.228402	0.699616
Crb3	-0.28108	2.85417	1.45125	0.228328	0.699616
Stat5a	-0.168006	7.42185	1.45224	0.228168	0.699616
Micall1	-0.183659	5.62466	1.45273	0.22809	0.699616
Sec23ip	-0.113042	6.08103	1.45319	0.228017	0.699616
Brd2	-0.0989565	9.00159	1.45354	0.227961	0.699616
Teddm2	-0.614467	-0.257194	1.44642	0.229103	0.699789
Zscan2	-0.221059	3.3545	1.44688	0.229029	0.699789
Aste1	-0.188309	3.7256	1.44713	0.228989	0.699789
Gm5127	-0.954339	-1.00851	1.44876	0.228728	0.699789
Ppp2r5e	-0.12505	6.26899	1.44918	0.228659	0.699789
Tspan13	-0.131511	6.77821	1.45007	0.228517	0.699789
Scamp2	-0.108721	6.97664	1.44223	0.229779	0.700228
Tmem104	-0.159929	4.28323	1.44239	0.229752	0.700228
Ccdc167	-0.191867	3.85009	1.44379	0.229527	0.700228
Zcchc11	-0.168578	7.95186	1.44497	0.229337	0.700228
Fgd2	-0.213206	6.79867	1.43867	0.230354	0.700725
Ppm1l	-0.198	4.47109	1.43894	0.230311	0.700725
Selo	-0.157775	4.58773	1.43899	0.230303	0.700725
Hist3h2a	-0.279869	2.41712	1.4357	0.230837	0.70168
Ei24	-0.11788	5.98292	1.43391	0.231127	0.70195
Zdhhc20	-0.165895	7.0286	1.43134	0.231546	0.702702
Tfam	-0.122046	6.22407	1.41206	0.234715	0.703401
Acadsb	-0.20474	4.33388	1.41218	0.234696	0.703401
Nob1	-0.143525	6.0251	1.41251	0.23464	0.703401
Abhd5	-0.318081	2.01413	1.41322	0.234522	0.703401
Wfikkn1	-0.512733	0.332816	1.41398	0.234396	0.703401
Mipep	-0.165297	4.64471	1.41411	0.234375	0.703401
Dnajb2	-0.181891	5.38388	1.41457	0.234299	0.703401
Fam172a	-0.148034	5.8648	1.41575	0.234105	0.703401
Ggact	-0.211102	3.39818	1.41599	0.234065	0.703401
Gpd1l	-0.124888	7.48472	1.41616	0.234036	0.703401
Acap2	-0.180936	6.95383	1.41789	0.233751	0.703401
Srp72	-0.0887693	7.27707	1.41803	0.233727	0.703401
Crot	-0.15547	4.84382	1.41952	0.233483	0.703401
Otud7b	-0.159503	7.12508	1.41954	0.233479	0.703401
Ttc26	-0.653768	-0.837133	1.41976	0.233443	0.703401
Oard1	-0.155474	5.44953	1.42087	0.23326	0.703401
Zfp961	-0.147471	5.2446	1.42135	0.233181	0.703401
Mipol1	-0.342943	1.65912	1.42205	0.233067	0.703401
Igkv4-69	-0.378054	2.44262	1.42253	0.232987	0.703401
Dnajb14	-0.241515	4.11837	1.42296	0.232916	0.703401
Hiat1	-0.128559	5.85713	1.42455	0.232656	0.703401
Mtap	-0.171576	5.65581	1.42634	0.232363	0.703401
2010315B03Rik	-0.162286	4.89747	1.42716	0.232228	0.703401
Tctn3	-0.183958	3.78112	1.42845	0.232017	0.703401
Zfp647	-0.340588	1.63876	1.40787	0.235411	0.703512
Mfap3	-0.171586	6.01558	1.40889	0.23524	0.703512
Rhbdd1	-0.205619	4.79141	1.40971	0.235105	0.703512
Zfp236	-0.201962	6.75893	1.40734	0.235498	0.703595
Inpp5d	-0.104702	8.61488	1.4067	0.235605	0.703738
Gtf3c3	-0.151354	4.65448	1.40488	0.235909	0.704142
Pde4a	-0.181491	4.83355	1.40291	0.236237	0.704565
Rps8	-0.156276	10.4562	1.4032	0.236188	0.704565
Ptpn2	-0.127742	5.55212	1.40161	0.236455	0.70486
Setd7	-0.180695	6.34582	1.40121	0.236521	0.704881
Eef1g	-0.127852	10.4447	1.39704	0.237219	0.705364
Rasa1	-0.143175	6.53761	1.39706	0.237216	0.705364
Nox1	-0.740685	-0.58956	1.39844	0.236986	0.705364
Kcnrg	-0.649563	-0.730006	1.39444	0.237656	0.705965
Mest	-0.542545	-0.17011	1.39228	0.238021	0.705991
Hhat	-0.300605	1.69546	1.39258	0.237971	0.705991
Pias1	-0.124325	6.60382	1.39284	0.237926	0.705991
Rnf24	-0.253788	2.45934	1.39398	0.237734	0.705991
Lins	-0.208159	3.86803	1.39071	0.238286	0.7066
Colgalt1	-0.103435	7.99583	1.38598	0.239086	0.707656
Gm21975	-0.378768	2.31392	1.3837	0.239471	0.708173
Habp4	-0.18023	4.79956	1.38064	0.239991	0.708649
Eif5a2	-0.233823	3.64014	1.38142	0.239859	0.708649
Ttc28	-0.229061	3.85709	1.37219	0.241435	0.708708
Gm9797	-0.567195	-0.835926	1.37237	0.241405	0.708708
Atg5	-0.143152	5.21265	1.37251	0.241381	0.708708
C77080	-0.400637	1.04898	1.37267	0.241354	0.708708
Sytl3	-0.581458	-0.377743	1.37283	0.241327	0.708708
Slc23a1	-0.373254	1.59603	1.37344	0.241222	0.708708
Agk	-0.148352	4.62537	1.37436	0.241064	0.708708
Bloc1s3	-0.164889	4.13379	1.37553	0.240865	0.708708
Ssr3	-0.108921	7.25954	1.37613	0.240761	0.708708
Chil5	-0.680938	1.14309	1.37633	0.240726	0.708708
Ski	-0.163396	6.24677	1.37643	0.24071	0.708708
Gm9949	-0.536961	-0.354766	1.37725	0.240571	0.708708
Pter	-0.487946	-0.531954	1.37807	0.24043	0.708708
Slc35g2	-0.5035	0.499076	1.3782	0.240408	0.708708
Rundc3b	-0.37854	1.16227	1.37885	0.240297	0.708708
Pcna-ps2	-0.332003	1.04565	1.36955	0.24189	0.708954
Invs	-0.184924	4.88695	1.3696	0.241881	0.708954
Prkd2	-0.154965	7.95813	1.36963	0.241876	0.708954
Midn	-0.137995	7.28953	1.3702	0.241777	0.708954
Kdm4a	-0.137644	7.24385	1.37129	0.241591	0.708954
Degs2	-0.310597	3.04196	1.36747	0.242248	0.708979
Desi2	-0.173765	5.61988	1.36288	0.243039	0.710248
Rpl15	-0.127159	9.67446	1.3629	0.243035	0.710248
Cyb561d1	-0.108665	6.18213	1.36373	0.242893	0.710248
Rundc1	-0.120892	5.42821	1.36063	0.243428	0.71051
Cflar	-0.220482	7.13801	1.361	0.243364	0.71051
Srd5a3	-0.185588	5.31993	1.36164	0.243253	0.71051
Tnfrsf17	-0.681994	-0.597717	1.35904	0.243703	0.710791
Arhgdib	-0.143756	8.90745	1.35864	0.243772	0.710819
Megf11	-0.581303	-0.273933	1.34776	0.245671	0.710858
1810032O08Rik	-0.185417	4.21507	1.34784	0.245656	0.710858
Tbc1d23	-0.13796	5.4476	1.34802	0.245624	0.710858
Elmod2	-0.178183	4.7803	1.34865	0.245513	0.710858
Fam134b	-0.117161	7.25677	1.34939	0.245385	0.710858
Tcf20	-0.185691	7.13091	1.35059	0.245174	0.710858
Dnajc28	-0.283928	2.52531	1.35124	0.245062	0.710858
Dnaja3	-0.145107	6.03789	1.35224	0.244886	0.710858
Hps3	-0.144262	6.65428	1.35256	0.244831	0.710858
Stard5	-0.180275	5.00746	1.35335	0.244694	0.710858
Dnajb12	-0.122345	5.6818	1.35537	0.244342	0.710858
Gbe1	-0.210235	4.30972	1.35543	0.244331	0.710858
Abhd17c	-0.145085	4.93758	1.35597	0.244237	0.710858
Taz	-0.122261	6.83923	1.35681	0.244091	0.710858
Dnajc16	-0.171314	5.3645	1.35736	0.243995	0.710858
Mrps30	-0.173825	4.77889	1.34673	0.245851	0.711126
Ppp4r2	-0.115745	7.22331	1.33379	0.248132	0.712183
Crkl	-0.160451	6.92245	1.33405	0.248085	0.712183
Gm15446	-2.34049	3.24613	1.33409	0.24808	0.712183
Tmem110	-0.142995	4.50657	1.33465	0.24798	0.712183
Rab4a	-0.49933	-0.0897258	1.33581	0.247775	0.712183
Fbxl3	-0.178826	6.85311	1.33591	0.247757	0.712183
Zfp317	-0.160589	5.85431	1.33603	0.247735	0.712183
Dnajb4	-0.157433	4.09612	1.33641	0.247668	0.712183
Plec	-0.194498	7.32624	1.3367	0.247616	0.712183
Slc22a5	-0.156946	4.14285	1.33801	0.247386	0.712183
Zhx2	-0.139451	6.49844	1.33854	0.247292	0.712183
Impg2	-0.390422	1.6533	1.33968	0.24709	0.712183
Zfp758	-0.175466	4.09504	1.34014	0.24701	0.712183
Slc28a2	-0.132249	7.28632	1.34233	0.246623	0.712183
Trmt61a	-0.182914	5.23424	1.33137	0.248562	0.712386
Slc26a2	-0.214111	4.93305	1.33154	0.248532	0.712386
Fzd5	-0.272016	3.05358	1.33171	0.248501	0.712386
Laptm4a	-0.102011	6.95717	1.32601	0.249517	0.713448
Pip5k1a	-0.1187	5.88862	1.32674	0.249385	0.713448
Zbtb33	-0.232172	5.95932	1.32677	0.24938	0.713448
Pus7l	-0.184051	4.32809	1.32387	0.249898	0.713977
Nsf	-0.140609	6.45788	1.3233	0.25	0.713982
Mettl2	-0.130764	5.24967	1.32284	0.250083	0.713991
Nabp1	-0.196463	5.36249	1.31984	0.25062	0.715182
Zbed5	-0.228895	2.73142	1.31933	0.250712	0.715273
Tirap	-0.164217	4.57008	1.31709	0.251114	0.715733
Zdhhc4	-0.138417	5.479	1.3171	0.251114	0.715733
Gabpa	-0.138572	6.53976	1.31627	0.251263	0.715985
Cd69	-0.261359	4.92225	1.31415	0.251644	0.716385
Rab39b	-0.457729	0.193524	1.3142	0.251635	0.716385
Zkscan5	-0.161211	4.03756	1.31148	0.252128	0.716864
Cyb5r2	-0.638662	-0.177637	1.3096	0.252468	0.717527
Cdkn1b	-0.143749	7.66923	1.30887	0.252599	0.717558
Mybpc1	-0.929853	-0.890733	1.30781	0.252791	0.717932
Peli1	-0.147894	6.16104	1.30614	0.253095	0.718279
Isg20l2	-0.105892	6.63879	1.30516	0.253273	0.718385
Pip4k2b	-0.114876	7.12464	1.30329	0.253614	0.718669
Spcs3	-0.103643	7.08536	1.3	0.254214	0.719224
Rnf220	-0.117707	7.13655	1.30018	0.254181	0.719224
Enpp1	-0.175045	4.96988	1.30042	0.254136	0.719224
Btg2	-0.150774	8.52421	1.30061	0.254103	0.719224
Wdr44	-0.188592	5.07824	1.29961	0.254285	0.719253
Cd19	-0.125309	10.6423	1.29595	0.254954	0.719385
Acadvl	-0.140084	5.22109	1.2967	0.254817	0.719385
Pacrgl	-0.155935	4.04961	1.29725	0.254717	0.719385
Zfp1	-0.16433	4.37166	1.29741	0.254687	0.719385
Fig4	-0.134924	5.91145	1.29787	0.254603	0.719385
Fam118a	-0.165423	4.04858	1.29868	0.254455	0.719385
Rpl13	-0.148972	10.9656	1.29449	0.255221	0.719507
Atg4c	-0.219193	3.39083	1.29371	0.255366	0.719744
Ralgapa2	-0.224389	5.02385	1.29136	0.255797	0.72031
Ap1b1	-0.0991993	7.14507	1.29189	0.2557	0.72031
Pygo2	-0.119751	6.38197	1.29017	0.256017	0.720383
Tfb2m	-0.126497	5.03281	1.28971	0.256101	0.720451
Tbc1d14	-0.12517	7.48968	1.2879	0.256436	0.720593
Bend5	-0.199433	4.63095	1.28702	0.256597	0.720623
Klf7	-0.290572	4.05615	1.28626	0.256738	0.72071
Utf1	-0.37656	1.52035	1.28582	0.256819	0.720719
Rpl37	-0.163219	9.08651	1.28518	0.256939	0.720762
Tm6sf1	-0.1854	6.09166	1.28171	0.257581	0.720862
Pex11b	-0.204176	3.87108	1.28238	0.257456	0.720862
Sppl2a	-0.136814	6.78911	1.28276	0.257386	0.720862
Map3k7	-0.131155	6.71028	1.28328	0.25729	0.720862
Lin7c	-0.151682	6.4968	1.27679	0.258496	0.722066
Rpl6	-0.145421	10.7464	1.27679	0.258496	0.722066
Slc25a30	-0.172459	4.87413	1.27299	0.259207	0.722693
Kdm2a	-0.149767	7.67322	1.27393	0.259031	0.722693
AA467197	-0.579967	0.0432996	1.27398	0.259022	0.722693
Klf10	-0.194222	4.67079	1.27433	0.258956	0.722693
Hcfc2	-0.147378	4.70257	1.26902	0.25995	0.723576
Mtmr9	-0.142376	5.31512	1.26758	0.26022	0.724161
Slc9a7	-0.261218	6.17396	1.26671	0.260385	0.724432
Papola	-0.132235	8.04908	1.26291	0.261101	0.725092
Cldn10	-0.367321	1.68377	1.26294	0.261095	0.725092
Crtc3	-0.108825	5.79208	1.26328	0.261031	0.725092
Flcn	-0.156735	6.77671	1.26398	0.260898	0.725092
Haao	-0.165807	6.73752	1.25564	0.262477	0.725771
Lipe	-0.149175	4.82792	1.25602	0.262407	0.725771
Arhgap12	-0.145855	5.22276	1.25671	0.262274	0.725771
Vrk3	-0.141398	5.74692	1.25708	0.262204	0.725771
Fyttd1	-0.175862	6.55752	1.25709	0.262203	0.725771
Lrrc75a	-0.218198	3.4216	1.25816	0.262001	0.725771
Golga3	-2.21335	5.08923	1.25364	0.262858	0.726233
Slc3a1	-0.803958	-0.876267	1.25328	0.262927	0.726254
Snx21	-0.194904	3.14517	1.25262	0.263053	0.726434
2410016O06Rik	-0.147035	4.63032	1.25194	0.263183	0.726625
Vhl	-0.137151	5.45257	1.24786	0.263962	0.72666
Col7a1	-0.360793	1.80246	1.24865	0.26381	0.72666
Armc8	-0.132657	5.80839	1.24949	0.26365	0.72666
Lcmt2	-0.1413	4.52189	1.25039	0.263479	0.72666
Aimp1	-0.14493	5.98272	1.25091	0.263379	0.72666
Stim1	-0.110736	6.28582	1.24503	0.264503	0.727398
Tm9sf3	-0.103789	8.08412	1.24526	0.264459	0.727398
Gba	-0.133319	6.13498	1.24438	0.264628	0.727575
Pyroxd1	-0.180991	3.67457	1.24319	0.264858	0.727645
Cry1	-0.143249	5.01358	1.24101	0.265276	0.727841
Tmem8	-0.153764	4.92522	1.24125	0.26523	0.727841
Slc41a2	-0.344576	3.21813	1.23902	0.265659	0.728221
Rps27	-0.29089	10.2048	1.23923	0.265619	0.728221
Tmem167b	-0.153132	5.31443	1.23692	0.266066	0.72831
Zdhhc17	-0.18232	5.75663	1.23099	0.267215	0.72951
Nck1	-0.124305	4.95679	1.23103	0.267207	0.72951
Gm2000	-0.249536	3.4474	1.23199	0.26702	0.72951
Sertad3	-0.239946	3.72316	1.23201	0.267017	0.72951
Atmin	-0.169565	6.07925	1.2215	0.269066	0.730025
Kctd10	-0.137357	5.77059	1.2219	0.268987	0.730025
Usp45	-0.219455	5.27276	1.2227	0.268831	0.730025
Rfx5	-0.141351	6.48939	1.2237	0.268636	0.730025
Mtdh	-0.178511	8.35549	1.22397	0.268583	0.730025
Gimap6	-0.158125	8.23338	1.22403	0.268572	0.730025
Atp8a1	-0.164064	6.31867	1.2253	0.268323	0.730025
Mif	-0.10867	7.95407	1.2258	0.268225	0.730025
Nr6a1	-0.277198	2.41862	1.22603	0.26818	0.730025
Rybp	-0.235364	4.97494	1.22725	0.267943	0.730025
Ncoa3	-0.123831	8.06594	1.22725	0.267942	0.730025
Cmpk1	-0.107603	6.39514	1.22735	0.267922	0.730025
Dmrt3	-0.980081	-1.01609	1.22846	0.267708	0.730025
Pikfyve	-0.186543	6.60983	1.21898	0.26956	0.730164
Csk	-0.133904	9.37249	1.21925	0.269508	0.730164
Phf8	-0.136666	6.31251	1.21928	0.269502	0.730164
Irak1	-0.0964711	7.66169	1.21971	0.269417	0.730164
Rpl5	-0.151149	10.309	1.21618	0.270112	0.731081
Nufip2	-0.236156	6.78486	1.21539	0.270268	0.731249
Rab33b	-0.149397	4.3547	1.21344	0.270652	0.731622
Mcam	-0.817766	-0.565359	1.21285	0.270769	0.731771
Chac2	-0.307921	1.99214	1.20492	0.272341	0.731863
Sgsh	-0.145675	5.29523	1.205	0.272325	0.731863
Pex12	-0.170497	4.12788	1.20534	0.272258	0.731863
Pus1	-0.133586	5.47977	1.20561	0.272204	0.731863
Llgl2	-0.139075	4.94101	1.20598	0.272129	0.731863
Slc7a5	-0.208164	7.36298	1.20683	0.271961	0.731863
Eci2	-0.155097	4.57607	1.20683	0.27196	0.731863
Fan1	-0.214471	3.70699	1.20797	0.271735	0.731863
Fam107b	-0.110358	8.48772	1.20811	0.271708	0.731863
Atp9a	-0.536933	0.353331	1.20895	0.271541	0.731863
Atf6	-0.142416	6.70963	1.20908	0.271514	0.731863
Slc10a7	-0.151556	5.03793	1.20953	0.271424	0.731863
Thada	-0.181252	5.57099	1.20992	0.271348	0.731863
Gm17655	-1.8763	1.84286	1.21116	0.271103	0.731863
Mtus2	-0.47178	0.777405	1.20129	0.273063	0.733126
Plekho2	-0.155529	6.51904	1.19978	0.273366	0.733293
Mdc1	-0.167237	7.01469	1.19995	0.273331	0.733293
Rsbn1l	-0.181859	6.64067	1.1975	0.273822	0.733708
Gzf1	-0.152033	4.51021	1.1968	0.273963	0.733735
Amot	-0.410319	0.520489	1.19517	0.274289	0.734112
Plbd2	-0.131985	6.32115	1.19546	0.274231	0.734112
Ggta1	-0.13397	5.62695	1.19379	0.274566	0.734477
Cdnf	-0.466898	-0.288857	1.19416	0.274492	0.734477
Phf20	-0.164201	6.0173	1.19144	0.27504	0.735128
Pank1	-0.179846	3.62201	1.18684	0.275967	0.736283
Fam160a1	-0.381367	1.01484	1.18715	0.275905	0.736283
Gtpbp6	-2.19177	4.36147	1.1859	0.276157	0.736605
Zkscan14	-0.182286	4.06436	1.18301	0.276744	0.737531
Taf3	-0.141302	4.94631	1.1805	0.277254	0.738063
Prox2	-0.272409	2.01666	1.18062	0.277231	0.738063
Zfp446	-0.174677	4.30691	1.179	0.277559	0.738212
Slc3a2	-0.133361	7.55501	1.17913	0.277534	0.738212
Zfp493	-0.228961	2.33338	1.16874	0.27966	0.738352
Ciart	-0.252456	3.42258	1.16888	0.279631	0.738352
Amd1	-0.136099	6.41558	1.16964	0.279474	0.738352
Atp11b	-0.162678	7.06735	1.16982	0.279437	0.738352
Tex261	-0.0956775	6.5173	1.17037	0.279324	0.738352
Qsox2	-0.161767	4.11788	1.17105	0.279185	0.738352
Immp2l	-0.281846	2.57456	1.17154	0.279086	0.738352
Parp6	-0.128645	5.41874	1.1717	0.279052	0.738352
Rps5	-0.146356	10.3781	1.17174	0.279044	0.738352
Aldh4a1	-0.173215	4.01372	1.17318	0.278748	0.738352
Dph6	-0.158301	4.96657	1.17415	0.27855	0.738352
Dph2	-0.144551	5.48848	1.17495	0.278386	0.738352
Fam73a	-0.199917	5.3223	1.17527	0.278321	0.738352
Traf5	-0.147389	6.08154	1.17533	0.278309	0.738352
Xiap	-0.166527	7.24073	1.17545	0.278285	0.738352
Casc4	-0.194252	3.72359	1.17714	0.277939	0.738352
Zfp418	-0.274913	1.991	1.17755	0.277855	0.738352
Ndrg3	-0.155032	5.68344	1.16833	0.279745	0.738403
Alg2	-0.16073	5.42453	1.16742	0.279932	0.738578
Ttc4	-0.112151	5.79291	1.16	0.281465	0.739087
Aff4	-0.231763	7.68458	1.16057	0.281348	0.739087
N4bp2l1	-0.123022	6.26333	1.16063	0.281335	0.739087
Cacul1	-0.128904	6.45077	1.16106	0.281245	0.739087
Parvg	-0.103888	7.93461	1.16136	0.281183	0.739087
Irak4	-0.132703	5.52521	1.16248	0.280951	0.739087
Emc10	-0.111141	7.20659	1.16255	0.280938	0.739087
Dcaf13	-0.104463	5.86143	1.16332	0.280779	0.739087
Tmcc1	-0.13935	5.00701	1.1639	0.280658	0.739087
Tmem261	-0.147272	5.16987	1.15311	0.282899	0.739578
Vprbp	-0.159274	6.52945	1.15324	0.282872	0.739578
Serpinb1a	-0.244967	6.65064	1.15365	0.282787	0.739578
Hspa13	-0.163796	4.67028	1.15374	0.282767	0.739578
Zfand5	-0.101905	6.83698	1.15588	0.282321	0.739578
Nudt18	-0.189109	4.22836	1.15604	0.282288	0.739578
Capn5	-0.202273	4.26203	1.15725	0.282037	0.739578
Rab40c	-0.150334	4.4309	1.15834	0.281809	0.739578
Kctd7	-0.179285	3.28618	1.14553	0.284487	0.739927
Zzz3	-0.16667	6.77617	1.14569	0.284454	0.739927
Pik3r4	-0.102996	6.33099	1.14609	0.284369	0.739927
Stk11ip	-0.103733	7.16184	1.14623	0.284339	0.739927
Rpl9-ps6	-0.249068	2.2548	1.14728	0.284119	0.739927
Rps7	-0.147709	10.5362	1.14736	0.284103	0.739927
Papd5	-0.167328	6.4652	1.14766	0.284039	0.739927
Ccdc157	-0.173453	4.15096	1.1479	0.283989	0.739927
Rec8	-0.384676	0.619307	1.14827	0.283911	0.739927
Ankzf1	-0.130049	5.95328	1.14861	0.283841	0.739927
Tmem167	-0.094262	6.19001	1.14912	0.283733	0.739927
Med26	-0.156881	4.58054	1.14939	0.283677	0.739927
Ythdf2	-0.125214	6.50195	1.14966	0.28362	0.739927
Ccdc88c	-0.133409	7.91248	1.15056	0.283433	0.739927
Cpne3	-0.193996	5.94716	1.15172	0.28319	0.739927
Rpl34	-0.153456	9.59733	1.14356	0.284902	0.740521
Pyhin1	-0.204104	8.29317	1.14383	0.284845	0.740521
Rpusd4	-0.126179	4.96726	1.14392	0.284826	0.740521
Abcg1	-0.347592	3.81302	1.14305	0.285008	0.740635
Nlk	-0.135128	5.27087	1.14256	0.285113	0.740745
Lmtk2	-0.147719	6.23707	1.14155	0.285324	0.740972
Zfp526	-0.163845	4.6112	1.14092	0.285459	0.741158
2310014L17Rik	-0.490492	-0.327981	1.13975	0.285705	0.741199
Neu1	-0.120189	6.00169	1.14009	0.285634	0.741199
Cecr6	-0.289333	3.55316	1.13775	0.286127	0.741784
St3gal1	-0.129313	7.072	1.13504	0.286702	0.74228
Chsy1	-0.159807	6.05694	1.13256	0.287231	0.743002
Fbxo11	-0.149524	7.42371	1.12982	0.287814	0.743014
Impa1	-0.0936703	6.09759	1.13083	0.287597	0.743014
Mrps18b	-0.150941	4.64828	1.12858	0.288079	0.743256
Camk2d	-0.115719	7.36126	1.12706	0.288402	0.743607
Ly6e	-0.147868	10.9152	1.12671	0.288478	0.743642
Sostdc1	-0.674216	-0.707081	1.12469	0.288911	0.74424
Zfp932	-2.16886	4.03422	1.12364	0.289136	0.74453
Rps18	-0.143848	10.4943	1.12297	0.28928	0.744579
Snx12	-0.110143	5.86242	1.12302	0.289268	0.744579
Idi1	-0.194217	5.70517	1.12246	0.289389	0.744698
Rapgef2	-0.162952	4.28514	1.11927	0.290076	0.745196
Pef1	-0.137868	5.13181	1.11976	0.289969	0.745196
Dennd5a	-0.122833	6.96462	1.11999	0.289921	0.745196
Cap1	-0.0854219	9.17317	1.12025	0.289865	0.745196
Slc35c1	-0.110622	6.1698	1.11737	0.290486	0.745424
Nudt16	-0.145605	4.7001	1.11664	0.290642	0.745664
Gigyf1	-0.12689	8.20696	1.11389	0.291239	0.745747
Cep85	-0.224147	8.65494	1.11466	0.291071	0.745747
Pim2	-0.192155	7.32339	1.11488	0.291023	0.745747
R3hcc1l	-0.135683	4.84513	1.11183	0.291685	0.746098
Cwf19l2	-0.182125	5.17549	1.11228	0.291588	0.746098
Supt7l	-0.137952	4.52196	1.11101	0.291863	0.746322
Kcnj1	-0.342493	1.85818	1.10986	0.292113	0.746401
Cox20	-0.281871	1.70853	1.10939	0.292215	0.746478
Mgarp	-1.06115	0.0554776	1.10885	0.292331	0.746615
Nicn1	-0.24852	3.53467	1.10436	0.293312	0.746894
Cds2	-0.133953	7.6896	1.10509	0.293152	0.746894
Rpl21	-0.165743	10.1089	1.10524	0.293118	0.746894
Twistnb	-0.118268	5.8026	1.10601	0.29295	0.746894
Tbc1d5	-0.123039	6.44068	1.10092	0.294065	0.747991
Zfp420	-0.202419	3.93952	1.10025	0.29421	0.748041
Rspry1	-0.126112	5.33057	1.09794	0.294718	0.748631
Gmfb	-0.123485	7.10292	1.09819	0.294665	0.748631
Zfp746	-0.097207	5.98654	1.09714	0.294894	0.748753
Nus1	-0.126599	6.40625	1.09565	0.295223	0.749014
Wdr73	-0.122789	5.2828	1.09575	0.2952	0.749014
Kras	-0.111312	6.51761	1.0961	0.295124	0.749014
Arcn1	-0.0992437	7.59495	1.09291	0.295827	0.749747
Gaa	-0.164469	6.31777	1.09302	0.295804	0.749747
Scd2	-0.223839	7.36892	1.09195	0.296039	0.750126
Stard6	-0.376154	0.789694	1.09144	0.296152	0.750133
1600002K03Rik	-0.18912	3.68597	1.08942	0.296599	0.75042
Rsbn1	-0.297046	5.59966	1.0871	0.297116	0.75063
Ccbl2	-0.191225	3.27587	1.08025	0.298641	0.751437
Abcf3	-0.122006	6.26742	1.08043	0.298601	0.751437
Rpl10	-0.113738	10.6354	1.08352	0.297912	0.751437
Apmap	-0.133506	4.77662	1.06243	0.302662	0.751926
Rab21	-0.0905414	7.31676	1.06286	0.302564	0.751926
Zfp354b	-0.478784	-0.0727154	1.06293	0.302548	0.751926
Sh3pxd2a	-0.163448	6.43971	1.06347	0.302424	0.751926
Mrm1	-0.135542	4.85509	1.06357	0.302402	0.751926
Adipor1	-0.104359	7.04711	1.06371	0.302371	0.751926
Dusp3	-0.186257	4.60206	1.06402	0.302301	0.751926
Dennd6b	-0.108739	5.88311	1.06412	0.302277	0.751926
Wdr45b	-0.117512	5.24405	1.06566	0.301928	0.751926
Ebag9	-0.135107	4.74168	1.06583	0.30189	0.751926
Usp28	-0.124107	5.63697	1.06598	0.301855	0.751926
Ackr3	-0.844821	0.273379	1.06651	0.301736	0.751926
Mark2	-0.0776176	7.75979	1.06662	0.30171	0.751926
Ttll13	-0.573565	-0.481535	1.06718	0.301583	0.751926
Apbb2	-0.372401	1.04298	1.06865	0.301252	0.751926
Cd79b	-0.177054	10.3166	1.06866	0.301248	0.751926
Zmym2	-0.17078	6.965	1.06902	0.301167	0.751926
2021-03-07	-0.137182	6.98676	1.06915	0.301137	0.751926
Zswim6	-0.142597	4.86557	1.06917	0.301134	0.751926
Gm12942	-0.201915	3.42741	1.06926	0.301114	0.751926
Khnyn	-0.156795	7.71628	1.06926	0.301113	0.751926
Zfx	-0.157676	6.0625	1.07023	0.300893	0.751926
Sqstm1	-0.120616	7.91951	1.07063	0.300804	0.751926
B3gat2	-0.399187	0.352521	1.07092	0.300739	0.751926
Bnip3l	-0.218124	7.2064	1.07313	0.30024	0.751926
Zfp661	-0.2031	3.25921	1.07358	0.300139	0.751926
Trabd	-0.0956886	6.90171	1.0745	0.299931	0.751926
Anxa11	-0.119555	5.31528	1.07472	0.299881	0.751926
Rabgap1	-0.128675	5.82066	1.07474	0.299877	0.751926
Frs2	-0.145939	5.66584	1.07531	0.29975	0.751926
Hif3a	-0.471996	0.540797	1.07572	0.299658	0.751926
Ctdsp2	-0.116065	7.6414	1.07575	0.299649	0.751926
Zfp958	-0.158369	3.7061	1.076	0.299594	0.751926
Tmed8	-0.184218	6.78354	1.07691	0.29939	0.751926
Hrh2	-0.304561	2.2694	1.07784	0.299182	0.751926
Zfp874b	-0.192734	4.02798	1.07848	0.299038	0.751926
Gm8251	-0.513239	0.351076	1.0616	0.302852	0.752008
Atad3a	-0.116997	6.90049	1.06108	0.302968	0.75214
Nckap1l	-0.0752762	8.84271	1.05901	0.303442	0.752218
Gpr182	-0.379751	0.922845	1.05914	0.303411	0.752218
Ube2v1	-0.348564	0.934073	1.05927	0.303381	0.752218
Dpp7	-0.136957	5.54794	1.05936	0.303361	0.752218
Phf6	-0.156056	6.27504	1.06051	0.3031	0.752218
2010012O05Rik	-0.170326	4.37812	1.05843	0.303574	0.75223
Ubiad1	-0.147424	4.7788	1.05604	0.30412	0.753426
BC024978	-0.157911	3.91775	1.05557	0.304228	0.753472
Poln	-0.396152	0.517224	1.05477	0.304411	0.753537
Nfkbid	-0.180598	7.86532	1.04966	0.305585	0.753603
2610021A01Rik	-0.172543	4.52806	1.05007	0.30549	0.753603
Ankib1	-0.148138	6.13079	1.0507	0.305345	0.753603
Igkv4-71	-0.724659	0.0940168	1.05154	0.305154	0.753603
Ndst1	-0.221523	6.15285	1.05291	0.304838	0.753603
Slc25a16	-0.145807	4.39308	1.05362	0.304674	0.753603
Kdm3b	-0.118245	7.731	1.05409	0.304567	0.753603
Polr2m	-0.0953537	7.61408	1.04933	0.305661	0.753634
Gpalpp1	-0.148922	6.08259	1.0489	0.30576	0.753723
Tmco3	-0.141457	4.00619	1.04818	0.305927	0.753976
Zbtb10	-0.259854	5.07882	1.04766	0.306046	0.754116
Rcbtb1	-0.125945	5.85813	1.04731	0.306127	0.754159
Gm4955	-0.40156	5.54968	1.04316	0.307087	0.754168
Prf1	-0.334971	1.94369	1.0432	0.30708	0.754168
Tbc1d13	-0.0931681	6.24964	1.04393	0.306908	0.754168
Zbtb44	-0.152427	6.08796	1.04406	0.306879	0.754168
Srek1ip1	-0.138356	4.6365	1.04467	0.306738	0.754168
Tpp1	-0.121962	7.16597	1.04506	0.306649	0.754168
Pom121	-0.134244	7.04603	1.04564	0.306514	0.754168
Tprkb	-0.110776	5.14733	1.04585	0.306466	0.754168
Commd8	-0.110613	6.06531	1.04585	0.306465	0.754168
Utrn	-0.227931	5.09334	1.0467	0.306269	0.754168
Ube3b	-0.081261	7.1624	1.0399	0.307844	0.754694
Fbxo47	-0.415892	0.454216	1.03997	0.307829	0.754694
Zfp131	-0.134139	6.07876	1.03863	0.30814	0.755208
Zfp2	-0.287035	1.83731	1.03626	0.308693	0.755784
4930432K21Rik	-0.251855	1.75691	1.03652	0.308633	0.755784
Khk	-0.167054	3.64843	1.03659	0.308616	0.755784
Rftn1	-0.109887	8.89859	1.0335	0.309337	0.756581
Dennd6a	-0.12117	6.38015	1.03365	0.309303	0.756581
Ehmt1	-0.11253	6.52626	1.03376	0.309278	0.756581
Rpap2	-0.140408	4.34315	1.03255	0.309559	0.756814
Rpl7	-0.128734	10.7375	1.03226	0.309628	0.756826
Dync1li1	-0.102453	5.90988	1.03149	0.309808	0.756955
Mtmr2	-0.100959	5.94677	1.03121	0.309874	0.756961
Acox3	-0.139853	7.55698	1.03047	0.310049	0.757078
Pemt	-0.320342	0.568272	1.029	0.310393	0.757551
Gzma	-0.702343	0.63101	1.02935	0.310311	0.757551
Dnaic2	-0.933274	-0.466277	1.02685	0.3109	0.757911
1810043G02Rik	-0.197529	3.29615	1.02588	0.311129	0.758314
Pomk	-0.15509	4.37997	1.02501	0.311333	0.758344
Sft2d3	-0.178757	3.8239	1.02537	0.311249	0.758344
Trappc11	-0.117245	6.14863	1.02314	0.311775	0.759109
Leng9	-0.177146	3.65639	1.02253	0.31192	0.759308
Zfp52	-0.175111	5.54895	1.02171	0.312115	0.759626
Tbpl1	-0.107103	5.5131	1.0214	0.312187	0.759646
Rpl41	-0.149186	10.0523	1.02098	0.312286	0.759732
Npc1	-0.136063	5.63567	1.01905	0.312744	0.759914
Stxbp5	-0.131544	5.31939	1.01929	0.312688	0.759914
Glt1d1	-0.574698	-0.768401	1.01963	0.312607	0.759914
Chd7	-0.182374	6.86693	1.01769	0.313067	0.760543
Wfs1	-0.170304	3.69847	1.01587	0.3135	0.760819
Hmgcs1	-0.145954	6.79126	1.01597	0.313476	0.760819
Mier1	-0.116382	7.14417	1.01523	0.313653	0.76098
Slc25a33	-0.203058	3.235	1.01396	0.313957	0.76146
Mbip	-0.139089	4.22848	1.01306	0.31417	0.761822
mt-Nd3	-0.253425	3.12419	1.01253	0.314297	0.761974
Traf6	-0.15067	6.30607	1.01183	0.314465	0.762072
Inpp5k	-0.109139	7.0523	1.01115	0.314626	0.762282
Bcl10	-0.099943	6.6083	1.01049	0.314786	0.762363
Fndc3a	-0.171234	6.22641	1.0099	0.314927	0.762413
Seh1l	-0.116242	6.50723	1.00909	0.315122	0.762576
Zbtb38	-0.182839	6.06348	1.0081	0.315359	0.762683
Fasn	-0.128393	8.00804	1.00812	0.315354	0.762683
Atp9b	-0.083323	6.97827	1.0037	0.316418	0.763233
Dgcr2	-0.0922627	6.093	1.00494	0.316118	0.763233
Dkc1	-0.124099	7.29854	1.00341	0.316488	0.763242
Slx4ip	-0.158316	4.27989	0.995701	0.318353	0.763457
Narf	-0.180808	5.74733	0.996134	0.318248	0.763457
Gpatch1	-0.120967	4.79286	0.99625	0.318219	0.763457
Nip7	-0.133834	6.04692	0.99632	0.318203	0.763457
Derl2	-0.0906602	6.01186	0.996824	0.31808	0.763457
Zfp874a	-0.165447	4.11828	0.997242	0.317979	0.763457
Abcb1b	-0.209137	4.58887	0.99795	0.317807	0.763457
Eml4	-0.105287	7.84246	0.998797	0.317602	0.763457
Ocel1	-0.121757	4.8812	0.999201	0.317504	0.763457
Adi1	-0.118229	5.44224	1.00005	0.317297	0.763457
Mat2b	-0.115941	6.67108	1.00124	0.31701	0.763457
Hipk1	-0.150064	7.93917	1.00135	0.316983	0.763457
Taf1c	-0.0991545	5.71541	1.0014	0.316972	0.763457
Spcs2	-0.091229	6.99956	0.993739	0.31883	0.76378
Gmip	-0.0940436	8.1778	0.994319	0.318689	0.76378
Cotl1	-0.141162	8.61727	0.992189	0.319208	0.764198
Gdap2	-0.151506	4.5122	0.990823	0.319541	0.764268
Etl4	-0.60792	0.206388	0.989973	0.319749	0.764441
Baz1a	-0.141867	7.93162	0.987751	0.320293	0.765126
Crtap	-0.164512	3.92078	0.984685	0.321045	0.765654
Ehd3	-0.196304	3.87117	0.982054	0.321692	0.766161
AI467606	-0.140046	6.13326	0.97928	0.322377	0.767327
Kat6a	-0.192809	7.8248	0.978539	0.32256	0.767458
Wbp1l	-0.0839285	6.68509	0.977142	0.322905	0.767974
Wdr36	-0.122979	6.62375	0.977207	0.322889	0.767974
Tsn	-0.10021	7.06312	0.975754	0.323249	0.768484
AI597479	-0.154051	5.14066	0.967178	0.325385	0.768695
Rnf2	-0.117165	6.33599	0.967394	0.325331	0.768695
Deptor	-0.357913	1.47424	0.967578	0.325285	0.768695
Dedd	-0.172391	3.39483	0.967677	0.32526	0.768695
Brat1	-0.100008	5.77295	0.967861	0.325214	0.768695
Ispd	-0.284376	1.49642	0.968076	0.32516	0.768695
Cep68	-0.128471	6.212	0.968473	0.325061	0.768695
Hspa1l	-0.359103	0.38557	0.969114	0.324901	0.768695
Pik3ap1	-0.137603	8.21307	0.97023	0.324623	0.768695
Dgkq	-0.155069	5.17893	0.970856	0.324467	0.768695
Ercc4	-0.268303	5.33047	0.971191	0.324383	0.768695
Fosb	-0.360456	1.37249	0.973121	0.323903	0.768695
Snw1	-0.0922306	6.07754	0.973176	0.323889	0.768695
Capza1	-0.0901362	7.95997	0.973488	0.323812	0.768695
Rpl38	-0.184532	8.69069	0.973973	0.323691	0.768695
Rab19	-0.222501	3.57052	0.96624	0.32562	0.768742
Tnrc6c	-0.134374	7.41064	0.966442	0.325569	0.768742
Zfp964	-0.341595	1.60758	0.965252	0.325867	0.768992
Zfp59	-0.162954	3.39087	0.962927	0.32645	0.769631
Serpine1	-1.0595	-0.915207	0.961599	0.326784	0.769658
Mgat4a	-0.174264	6.06949	0.961601	0.326784	0.769658
Fgfbp3	-0.450861	1.01965	0.957882	0.327721	0.769731
H6pd	-0.17728	4.4404	0.958287	0.327619	0.769731
Med17	-0.0999404	6.14216	0.958538	0.327555	0.769731
Gpbp1l1	-0.114355	6.80668	0.958795	0.327491	0.769731
Ghitm	-0.0994687	8.09524	0.959477	0.327319	0.769731
Crim1	-0.271912	2.65547	0.959627	0.327281	0.769731
Rcsd1	-0.113326	8.32883	0.959654	0.327274	0.769731
Nub1	-0.108648	6.46364	0.96043	0.327079	0.769731
[truncated: 3,295 more rows]

## Sheet: WT_IgM_vs_KO_IgM_lo_q05genes
Cnr2
Mrgpre
Tsc22d3
Sdc4
Plaur
Neurl3
2021-03-01
Stac2
Apc2
Fcrl1
Icosl
S1pr1
H2-DMb2
Scimp
Bcl6
Galnt6
Itgb7
Tcp11l2
Mafk
Gbp3
H2-Ob
Ttpal
Grap2
Fcer2a
Cd53
Tnfrsf26
St6gal1
Fam43a
Irgq
Pkib
Lpxn
Msrb3
Spata13
Stk17b
Kif9
Ehhadh
Scd1
Spns2
Egr1
Rnf144a
Cxcr5
Pear1
H2-Aa
Il4ra
BC106179
Btnl2
Pxdc1
Lmbrd1
Cytip

## Sheet: WT_Both_vs_KO_Both_up
gene	logFC	logCPM	LR	PValue	FDR
Orai1	3.88779	5.01404	131.727	1.71709e-30	2.04231e-26
Orai3	4.79664	4.89913	74.8862	4.98649e-18	2.96547e-14
Wnt1	3.01589	0.280558	41.508	1.17387e-10	4.654e-07
Drp2	2.55579	-0.850532	30.2523	3.79351e-08	7.51999e-05
Cd79a	0.709524	10.4293	29.2118	6.48819e-08	0.000110244
Otx1	1.661	0.848427	26.3838	2.79877e-07	0.000369874
Ncoa7	0.519753	5.1332	21.2339	4.06513e-06	0.00345362
Inpp4a	0.493089	5.70012	20.0926	7.37829e-06	0.0058505
Auts2	1.64134	0.0912069	19.6621	9.24184e-06	0.00646603
Wnt10b	0.784826	3.90128	18.9444	1.34583e-05	0.00832232
Gpr176	1.29894	0.602526	17.4895	2.88897e-05	0.0149398
Egfl6	2.25092	-0.539942	15.7733	7.1403e-05	0.0320344
Rgs9bp	0.900479	1.64773	14.9043	0.000113108	0.038255
Pla2g4c	1.07634	0.924917	14.8601	0.000115788	0.038255
Ncapd3	0.442086	5.72234	14.663	0.000128547	0.0408778
Ppm1e	0.684655	4.80034	14.5842	0.000134037	0.0408778
Rcan1	0.581993	5.25277	13.905	0.000192283	0.0557809
Chga	2.32624	-0.465204	13.5731	0.000229456	0.0634685
Mybl1	0.858097	2.49796	13.3338	0.000260671	0.06901
Sema4c	1.11059	2.53948	13.2862	0.00026736	0.06913
Ccl4	0.825863	4.04753	13.1829	0.000282508	0.0711986
Tbx2	3.4416	-1.05394	12.8717	0.000333583	0.0776751
Rad54b	0.797634	3.23004	12.8213	0.000342689	0.0776751
Slc30a3	1.23371	-0.448715	12.8027	0.000346122	0.0776751
A930004D18Rik	1.45219	-0.658492	12.282	0.000457341	0.0983756
Ccl3	0.995448	2.90035	12.2584	0.000463178	0.0983756
2021-09-10	0.613479	2.05137	12.1383	0.00049397	0.101298
Hist1h2be	1.39808	0.263302	12.0532	0.000517046	0.104233
Rab11fip4	1.06166	4.074	11.7449	0.000610087	0.112823
Cd44	0.337464	7.39231	11.7189	0.000618682	0.112823
Syde2	1.17566	-0.383793	11.6969	0.000626055	0.112823
Nr4a2	1.31928	2.18257	11.6158	0.00065395	0.116091
Il5ra	0.752016	4.9589	11.5179	0.000689307	0.120568
Ppp2r3a	0.622675	2.1645	11.4153	0.000728422	0.123769
Slc39a8	0.907872	0.663523	11.3111	0.000770438	0.123966
Pcp4	2.40466	-0.941691	11.3091	0.000771273	0.123966
Cst6	2.2652	0.195022	11.2446	0.000798529	0.12497
Mcam	1.98628	-0.565359	11.1064	0.000860324	0.128059
Zfp367	0.407463	5.46235	11.0941	0.000866042	0.128059
Spp1	1.37189	2.25888	11.0646	0.000879899	0.128059
Phyhip	1.09484	2.43878	11.0185	0.000902056	0.128059
Pcdhgc4	1.69651	-1.22727	10.9989	0.000911666	0.128059
Efcab8	0.916066	0.307351	10.9701	0.000925939	0.128059
Pard6g	0.82243	3.38933	10.8957	0.000963888	0.130305
Hsd11b1	0.800475	3.04944	10.8345	0.000996272	0.130305
Il1r1	1.07397	-0.0510989	10.6335	0.00111055	0.14052
Psip1	0.263309	6.68822	10.5184	0.00118191	0.147975
Havcr1	0.510474	5.22243	10.3675	0.00128253	0.150221
Atad2	0.407308	6.76431	10.1498	0.00144319	0.16354
Smc3	0.245833	6.86987	10.0814	0.00149771	0.166483
3110007F17Rik	1.06411	0.342023	9.93217	0.00162415	0.175869
Ksr2	1.28779	2.38675	9.79642	0.00174852	0.181495
Chrnb1	0.545066	4.38703	9.66782	0.00187523	0.190633
Irs1	2.47444	-0.0156574	9.50176	0.00205275	0.201597
Med12l	1.16356	0.937447	9.50004	0.00205468	0.201597
Pkp4	0.656843	3.98615	9.48832	0.00206784	0.201597
Kcnn4	0.863901	5.53279	9.46947	0.0020892	0.202024
Mpzl3	0.502942	2.9166	9.36879	0.00220711	0.210011
Sned1	1.01007	1.4236	9.32302	0.00226293	0.212669
Gng10	1.11969	0.0979521	9.2929	0.00230043	0.212669
Igsf3	1.45371	-0.0856126	9.10684	0.00254655	0.231212
Otos	1.80389	-0.780241	9.05267	0.00262311	0.233915
Dsn1	0.362744	4.60018	9.011	0.00268359	0.233915
Ulbp1	0.518914	4.61483	8.99041	0.002714	0.233915
Nmb	0.953398	0.834178	8.849	0.0029325	0.250929
Cacna2d1	3.7689	-0.93214	8.83547	0.00295431	0.25099
Smc4	0.379722	7.46071	8.81978	0.00297983	0.251362
Myef2	0.374947	5.1603	8.80564	0.00300301	0.251533
Zap70	1.09512	1.08658	8.73798	0.00311649	0.253305
Dhdh	0.469514	3.0834	8.7268	0.00313566	0.253305
Anp32e	0.236552	8.04244	8.71736	0.00315193	0.253305
Ctnnal1	0.512041	3.01827	8.59014	0.00337988	0.265939
Zdhhc2	1.29176	-0.707774	8.58465	0.00339009	0.265939
Atp8b2	0.319241	7.08958	8.57516	0.0034078	0.265939
Piga	0.436317	4.14762	8.56588	0.00342521	0.265939
Synpo	0.835598	2.41454	8.51216	0.00352781	0.268973
Serpinc1	1.05014	1.01914	8.45679	0.00363683	0.27258
Hnrnpa2b1	0.213518	10.5001	8.45327	0.00364387	0.27258
Gm6020	1.01225	0.00129165	8.39221	0.00376832	0.277083
Gm3636	1.01833	-0.419189	8.37849	0.00379689	0.277083
Srgap2	0.372464	5.28234	8.37831	0.00379726	0.277083
Dusp14	0.80098	0.80114	8.34642	0.00386447	0.280268
Prdm1	0.72948	2.64107	8.26802	0.00403495	0.287375
Pola1	0.368752	5.50121	8.21126	0.00416312	0.292804
G0s2	1.57399	-0.348951	8.20174	0.00418502	0.292804
Fsbp	0.957668	-0.400695	8.14579	0.00431611	0.296475
Cntnap1	1.12899	2.3103	8.13434	0.00434347	0.296475
Kif20b	0.398349	5.00979	8.12657	0.00436212	0.296475
Blm	0.404732	4.81539	8.0246	0.00461462	0.303239
Cbx3	0.282521	6.58911	7.98199	0.00472449	0.304992
Cbx2	0.568647	3.06266	7.95574	0.00479351	0.304992
Fam122b	0.345935	4.65433	7.9482	0.00481354	0.304992
Zdhhc15	2.10065	-0.873653	7.91038	0.00491519	0.304992
Eri1	0.228259	6.11604	7.90399	0.00493258	0.304992
Ikbip	0.498304	2.28812	7.87767	0.0050049	0.304992
Gm10226	0.856695	1.00623	7.87177	0.00502124	0.304992
Skida1	0.814749	0.957705	7.86116	0.0050508	0.304992
Brca1	0.547411	4.8313	7.83777	0.00511658	0.307246
Ercc6l	0.398135	4.46101	7.82025	0.0051664	0.307246
Plxnb1	1.04697	0.288515	7.79579	0.0052368	0.309883
Pnn	0.312631	7.52352	7.78017	0.00528229	0.311028
Slc44a1	0.32003	5.34242	7.7485	0.00537571	0.311896
Cyp1a1	2.58582	0.677879	7.71161	0.00548669	0.315259
Dsel	0.76296	1.30316	7.63277	0.00573173	0.324
Tnfrsf19	1.42698	1.23577	7.62645	0.00575183	0.324
Slc16a11	1.23993	2.44914	7.60629	0.0058165	0.324795
Rnf208	1.19949	-0.153613	7.52195	0.00609517	0.33719
Baz1b	0.231382	8.12897	7.42482	0.00643302	0.344351
Prkra	0.48652	2.5992	7.41835	0.00645621	0.344351
Rad21	0.232055	7.73657	7.37248	0.00662297	0.34949
Cyb561	1.3952	-0.800076	7.36766	0.00664073	0.34949
Jade3	0.401003	3.99569	7.31903	0.00682284	0.355925
Gkap1	0.589265	1.79816	7.30532	0.00687508	0.357084
Efcab11	0.842758	0.65805	7.29023	0.00693306	0.35853
Epb4.1l5	0.517265	2.41024	7.25304	0.0070781	0.358804
Smc2	0.411541	6.29067	7.2426	0.00711937	0.358804
Zfp467	0.400576	3.84106	7.1578	0.00746389	0.371446
Parp8	0.336541	5.60536	7.13221	0.00757114	0.375213
Mllt3	0.329898	5.01718	7.12334	0.00760869	0.375509
Pcgf5	0.373743	5.80011	7.11002	0.00766544	0.376747
Dmwd	1.21535	0.0282517	7.08161	0.00778789	0.380781
Wdhd1	0.287241	6.09612	7.01895	0.00806514	0.385248
Slc29a4	0.770461	1.8868	6.98337	0.00822707	0.388451
Eea1	0.399139	5.963	6.97984	0.0082433	0.388451
mt-Nd2	0.591133	10.3056	6.96855	0.00829548	0.388451
Il1rl1	2.27117	-0.397505	6.94333	0.00841325	0.390986
Ppp1cb	0.211022	7.51889	6.93289	0.00846249	0.390986
Tbc1d32	0.513957	2.47757	6.88103	0.00871151	0.392348
Caap1	0.338773	3.73537	6.86144	0.00880755	0.392348
Ssx2ip	0.438633	3.25799	6.83653	0.0089312	0.396372
Stard13	1.05543	-1.08947	6.79834	0.00912425	0.400457
Ammecr1	0.349568	4.50525	6.75824	0.00933156	0.405994
Ndrg1	0.402447	4.89263	6.75418	0.00935281	0.405994
Mtf2	0.257842	6.36718	6.74061	0.00942426	0.407608
Xcl1	1.4653	-0.854984	6.72396	0.0095126	0.408458
Pter	0.854382	-0.531954	6.68697	0.00971202	0.410505
Bmp1	0.758159	1.15833	6.68575	0.00971864	0.410505
AA386476	0.846916	0.709044	6.67155	0.00979641	0.410505
Gramd1b	0.494834	4.97095	6.67055	0.00980187	0.410505
Chka	0.251213	6.20948	6.64974	0.009917	0.410985
Ctla4	0.94869	1.04355	6.6362	0.00999271	0.412685
Nkrf	0.273631	4.5897	6.62345	0.0100645	0.41421
Syne2	0.496674	5.20314	6.5921	0.0102432	0.418039
E2f3	0.32435	4.89023	6.58868	0.0102629	0.418039
Cep76	0.358982	3.65674	6.57739	0.0103282	0.419031
Lcn2	3.449	0.527952	6.54024	0.0105461	0.419031
Ccnl1	0.183331	7.63816	6.53101	0.010601	0.419031
Ccdc88a	0.457149	4.29781	6.53044	0.0106044	0.419031
Kif13a	0.578054	3.59692	6.49741	0.0108032	0.422674
Rbpj	0.313911	6.92877	6.48209	0.0108967	0.424935
Napepld	0.460853	2.5053	6.46551	0.0109988	0.427515
Stk38l	0.352063	3.974	6.45197	0.0110829	0.427534
Npr1	1.77572	0.0818975	6.43407	0.0111952	0.427534
Dnmt1	0.258526	8.17816	6.43122	0.0112131	0.427534
Hells	0.384295	6.47329	6.4217	0.0112734	0.427534
Cort	1.16565	-0.836398	6.41048	0.0113449	0.427534
BC024978	0.340163	3.91775	6.40602	0.0113734	0.427534
Tnfsf4	1.03311	1.03379	6.39831	0.0114229	0.427534
Brd3	0.199489	6.66855	6.39741	0.0114287	0.427534
Plau	1.05233	1.2541	6.39711	0.0114306	0.427534
Hspa14	0.449763	2.99496	6.3889	0.0114836	0.428169
Gpm6b	0.658159	1.37971	6.34756	0.0117543	0.430997
Sspo	0.702285	1.48903	6.34416	0.0117769	0.430997
Fhl4	0.834973	-0.19155	6.31719	0.0119573	0.434086
Car13	0.583901	2.16178	6.3098	0.0120073	0.434086
Itgb1bp2	0.748079	0.489323	6.29196	0.0121287	0.434419
Grsf1	0.232936	5.82274	6.29129	0.0121332	0.434419
Pip5k1b	0.315354	4.59986	6.28495	0.0121767	0.434419
Eid1	0.278841	5.03788	6.21308	0.012681	0.441327
Arhgap11a	0.436259	5.74527	6.21085	0.012697	0.441327
Nr4a3	0.4113	5.77339	6.20212	0.0127598	0.441327
Polq	0.466919	4.08443	6.18419	0.0128897	0.441327
Nsg2	1.00147	0.294832	6.18051	0.0129165	0.441327
Dek	0.234584	7.86792	6.13205	0.0132753	0.448879
Slbp	0.275566	6.5787	6.13083	0.0132845	0.448879
Fancd2	0.540752	4.34395	6.1095	0.0134457	0.45304
Lime1	1.24632	-0.718098	6.08657	0.0136213	0.454786
Pdgfa	1.49879	1.08573	6.07565	0.0137058	0.454786
Ccdc82	0.270523	6.42661	6.0754	0.0137077	0.454786
Asap1	0.190912	6.47181	6.02681	0.0140902	0.463822
Mfap1a	0.3014	4.9221	6.00592	0.014258	0.466438
Skp2	0.376012	3.52668	5.95349	0.0146882	0.471928
Zik1	0.638218	1.92538	5.9502	0.0147156	0.471928
Acvr2b	1.13284	-0.602333	5.93365	0.0148544	0.474942
Tcf4	0.310818	8.35928	5.92293	0.014945	0.476559
Ccl22	1.09152	5.84998	5.91137	0.0150435	0.477139
Rap2a	0.543143	3.11065	5.89292	0.0152019	0.479605
Mms22l	0.267738	5.02062	5.88395	0.0152795	0.480779
Rnf168	0.210389	5.55575	5.8772	0.0153382	0.481352
Smc1a	0.211366	7.53342	5.86075	0.0154822	0.484149
Prpf38b	0.213993	8.27545	5.84154	0.0156521	0.487345
Nkap	0.256402	4.86692	5.79062	0.0161119	0.490409
Dixdc1	1.27245	-0.595607	5.78193	0.0161918	0.490409
Itgb1	0.293309	6.72647	5.76528	0.0163459	0.490409
Brca2	0.340828	4.92827	5.76325	0.0163648	0.490409
Nfya	0.163717	7.4616	5.75762	0.0164173	0.49062
Nt5e	0.792007	1.30686	5.74155	0.0165681	0.490947
Aarsd1	0.50244	1.4555	5.73814	0.0166003	0.490947
Maged2	0.710423	1.22337	5.72551	0.0167202	0.491884
4933406P04Rik	0.830386	-0.0743353	5.69704	0.0169936	0.496424
Prkca	0.268605	7.11283	5.6934	0.0170288	0.496424
Vsig10	0.622559	2.61774	5.67767	0.0171821	0.499669
Phtf1	0.234638	5.22583	5.66783	0.0172789	0.501255
Srrm1	0.17141	8.19305	5.65287	0.0174269	0.504319
Jazf1	1.1431	-0.648908	5.63963	0.0175589	0.505626
Gpr55	0.645411	2.63547	5.62206	0.0177358	0.506449
Serf1	0.696623	1.21833	5.59213	0.0180414	0.511113
Recql	0.21199	5.50116	5.5879	0.0180849	0.511113
Zbtbd6	0.503352	1.56456	5.58359	0.0181295	0.511113
Isoc2b	0.525335	2.07086	5.58313	0.0181343	0.511113
Nadk2	0.295927	4.52789	5.57441	0.0182248	0.511239
Gm29666	0.628563	0.844933	5.55347	0.0184441	0.514962
Cep57	0.170491	6.75837	5.54428	0.0185412	0.516461
Ift80	0.316832	4.66133	5.53164	0.0186756	0.518988
9130023H24Rik	0.381841	2.89468	5.5242	0.0187552	0.519986
Bcl6b	0.44005	4.74615	5.50485	0.0189638	0.523205
Hnrnpu	0.16201	10.1348	5.50014	0.019015	0.523205
Casc5	0.770173	4.22518	5.48549	0.0191749	0.523205
Cd70	1.04601	-0.623475	5.47214	0.019322	0.523205
Col15a1	0.924728	-0.28313	5.47044	0.0193408	0.523205
Eml6	0.92198	0.448725	5.4695	0.0193512	0.523205
Klf1	1.25792	-0.236347	5.46274	0.0194261	0.523205
Tbc1d31	0.385148	3.77638	5.4624	0.01943	0.523205
Sh3bp1	0.719739	4.12897	5.46122	0.0194431	0.523205
Nacc2	0.896622	1.3203	5.45623	0.0194987	0.523515
Rgag4	0.368878	3.18232	5.44316	0.019645	0.523897
Nefh	0.41258	3.01522	5.41943	0.0199139	0.525496
Gk5	0.447866	2.60504	5.41225	0.0199959	0.525496
Phldb1	0.682655	2.50373	5.41132	0.0200066	0.525496
Zc3hav1l	0.575503	2.37751	5.4068	0.0200585	0.525496
Tspan33	1.23554	2.65201	5.39847	0.0201545	0.525696
Cntln	0.584516	2.99395	5.37042	0.020481	0.533045
Rbpms2	0.906852	-0.340982	5.36571	0.0205364	0.533319
Morf4l2	0.174823	6.90281	5.35494	0.0206637	0.534291
Lmo7	0.536413	1.45603	5.34904	0.0207336	0.534772
Dhrs13	0.388329	1.99694	5.3458	0.0207722	0.534772
Zfp330	0.189883	5.83498	5.3257	0.0210132	0.537486
Fam60a	0.215521	5.41242	5.31733	0.0211144	0.537761
Nkg7	1.22402	0.23641	5.29262	0.0214159	0.54196
Ispd	0.635425	1.49642	5.28449	0.0215162	0.542642
Vangl2	0.580758	4.098	5.28238	0.0215423	0.542642
Dhfr	0.416011	4.89691	5.27935	0.0215798	0.542642
Cit	0.671564	4.33513	5.2674	0.0217285	0.542922
5730409E04Rik	0.668261	0.63902	5.26608	0.0217449	0.542922
Ankrd32	0.265412	4.92646	5.25801	0.021846	0.54359
Palb2	0.35109	4.06173	5.25123	0.0219313	0.543876
Nucks1	0.218826	7.63015	5.22525	0.0222612	0.54801
Tigd3	0.555575	1.60909	5.22222	0.0223001	0.54801
Lmcd1	0.780379	-0.263397	5.20865	0.0224747	0.55003
Chml	0.35269	5.30645	5.17449	0.0229209	0.558649
Tle3	0.228352	7.059	5.15023	0.0232433	0.563273
Hnrnpa3	0.215644	9.83262	5.14597	0.0233004	0.563273
Spry2	0.567964	3.68624	5.14051	0.0233738	0.563273
Nyx	1.16141	2.08314	5.13388	0.0234633	0.563273
Lmtk3	0.7715	-0.270349	5.12638	0.0235648	0.563273
Gmpr	1.67132	-0.921379	5.1231	0.0236095	0.563273
Slc26a8	1.09342	-0.623225	5.12148	0.0236315	0.563273
Fmn2	1.23666	0.354719	5.11796	0.0236794	0.563287
Rasgef1a	0.981834	1.13429	5.09935	0.0239348	0.565872
Gm10676	0.788797	0.871458	5.09619	0.0239784	0.565872
Wnt6	1.1729	-0.794606	5.08736	0.0241009	0.56662
Odc1	0.19662	8.18642	5.07724	0.024242	0.56662
Topbp1	0.191331	7.65885	5.07357	0.0242933	0.56662
Zranb3	0.418454	4.03323	5.06047	0.0244776	0.567576
Whsc1	0.304053	6.83606	5.06026	0.0244806	0.567576
Arid3a	0.333992	6.19947	5.04742	0.0246626	0.567576
6430548M08Rik	1.07219	2.23787	5.04729	0.0246644	0.567576
Gfpt1	0.28321	6.3005	5.03753	0.0248038	0.567576
Fzd6	0.838759	0.954682	5.03348	0.0248619	0.567576
Ap1ar	0.212598	6.14637	5.02668	0.0249596	0.568717
Pdcd1	0.725367	4.75977	5.02002	0.0250559	0.569379
Txlnb	0.657635	1.34833	5.01144	0.0251803	0.570467
Spdl1	0.260551	3.80575	5.00583	0.0252621	0.570501
Sclt1	0.351816	4.22447	4.99967	0.0253521	0.570501
Dmxl2	0.926818	1.90276	4.99242	0.0254585	0.570501
Gfra1	1.94914	0.755785	4.99003	0.0254938	0.570501
Stk3	0.497573	2.99342	4.97875	0.0256605	0.570501
Suz12	0.230407	7.46022	4.95836	0.0259648	0.570501
Pqlc3	0.325244	4.78566	4.95399	0.0260306	0.570501
Arc	0.705555	2.79057	4.95329	0.026041	0.570501
Olfr1330	3.44108	0.034383	4.94847	0.0261138	0.570501
Sorbs1	0.578896	2.37299	4.94354	0.0261883	0.570501
Msl3l2	0.489636	1.37259	4.93372	0.0263375	0.571922
Bcorl1	0.383855	3.02503	4.91988	0.0265493	0.574142
Fancm	0.316021	5.08033	4.91215	0.0266684	0.574509
F5	1.30144	1.79721	4.91081	0.0266891	0.574509
Vsig10l	0.521834	1.6432	4.89843	0.0268812	0.574509
Cab39	0.169788	7.71712	4.88854	0.0270356	0.574509
C330007P06Rik	0.203375	6.21215	4.88811	0.0270423	0.574509
Casp7	0.353326	4.27607	4.88587	0.0270775	0.574509
Hmgb1	0.266074	8.58354	4.88414	0.0271045	0.574509
Snx11	0.220187	6.91739	4.8786	0.0271917	0.574509
Fbxo48	0.455458	2.98974	4.87288	0.0272819	0.574509
Arhgef2	0.167299	7.72341	4.87267	0.0272852	0.574509
Mastl	0.735504	2.45883	4.87084	0.0273142	0.574509
Paox	0.310394	3.74972	4.86788	0.0273611	0.574509
Sh3kbp1	0.15204	8.0347	4.86211	0.0274528	0.574509
Klrb1b	1.40946	0.158304	4.862	0.0274546	0.574509
Coro1c	0.233182	6.63684	4.83905	0.0278222	0.576078
Gtf2e1	0.226046	5.93801	4.83734	0.0278498	0.576078
Supt16	0.209347	7.46562	4.81293	0.0282469	0.582269
Wdr62	0.437375	4.27248	4.79808	0.0284914	0.582522
Cenpp	0.764479	1.43088	4.7929	0.0285773	0.582522
Srsf11	0.179512	8.44817	4.79141	0.0286021	0.582522
Alg6	0.320384	3.58152	4.76487	0.0290463	0.586827
Xylb	0.403711	1.72782	4.75798	0.0291628	0.586827
Trem1	2.43424	-1.20486	4.7553	0.0292081	0.586827
S100pbp	0.219959	6.58582	4.74505	0.0293826	0.588345
Slit1	1.28032	-0.489724	4.72403	0.0297439	0.592379
Polh	0.221505	4.93412	4.72	0.0298138	0.592379
Vav3	0.258479	6.19338	4.71516	0.0298979	0.592379
Rassf8	1.29166	0.142896	4.68729	0.0303865	0.59587
Bcas1	0.669831	0.405472	4.68703	0.0303911	0.59587
Kctd9	0.230655	4.69486	4.68328	0.0304576	0.59587
Rangap1	0.212828	7.16427	4.67302	0.03064	0.59587
Noxa1	1.44942	0.434734	4.67229	0.030653	0.59587
Clstn1	0.423784	3.4462	4.6714	0.0306689	0.59587
mt-Nd6	0.490862	9.17166	4.65095	0.0310363	0.599163
Pacsin1	0.342449	6.11536	4.64846	0.0310815	0.599163
Slc35b4	0.166119	5.62105	4.63007	0.0314162	0.600746
Arl5a	0.299515	6.97882	4.62058	0.0315906	0.601234
Sft2d2	0.218295	6.82905	4.61951	0.0316104	0.601234
Actn1	0.821487	5.85791	4.61189	0.0317511	0.601234
Fmr1	0.220245	6.63879	4.61136	0.0317609	0.601234
Gm11084	1.60693	-0.544177	4.61051	0.0317765	0.601234
Snai3	0.420249	2.45265	4.60022	0.0319679	0.601234
Osgin2	0.226525	4.33306	4.58806	0.0321955	0.601234
Tmco3	0.257951	4.00619	4.58802	0.0321963	0.601234
Erlin1	0.222306	4.97893	4.58602	0.0322339	0.601234
A230083G16Rik	0.835091	-0.253084	4.58304	0.0322898	0.601234
6720489N17Rik	0.327825	2.32439	4.57746	0.0323953	0.601234
Itga9	1.28571	0.852446	4.57604	0.0324221	0.601234
Ugdh	0.201361	5.59355	4.5735	0.0324701	0.601234
Parpbp	0.772777	2.14112	4.57319	0.0324761	0.601234
Pstpip2	0.864162	2.48189	4.57125	0.0325129	0.601234
Mns1	0.596949	2.6546	4.56762	0.0325819	0.601234
Hjurp	0.325445	7.09429	4.5667	0.0325994	0.601234
Gm3604	0.365048	2.31855	4.56644	0.0326043	0.601234
Ddx11	0.286566	4.86105	4.55278	0.0328653	0.604173
Zbtb20	0.493501	5.33036	4.5352	0.0332045	0.607266
Tfr2	2.34444	-0.992974	4.51962	0.0335083	0.609031
Ect2	0.480888	3.73516	4.51837	0.0335327	0.609031
Ezh2	0.321512	6.89068	4.49811	0.0339323	0.610919
Hook1	0.394505	5.72348	4.49463	0.0340015	0.610919
Rtn4ip1	0.241591	5.39067	4.49199	0.0340541	0.610919
Smco4	0.625969	2.58101	4.48252	0.0342433	0.612895
1700026L06Rik	1.38761	-0.627228	4.48132	0.0342673	0.612895
Ticam2	0.259858	4.55473	4.46778	0.0345397	0.61369
Mboat1	2.45172	-1.25775	4.44346	0.0350351	0.619179
AC132444.1	1.71975	-0.390303	4.44029	0.0351003	0.61941
Zwilch	0.393364	4.20654	4.43723	0.0351632	0.619601
Srgap3	0.94711	1.85651	4.42898	0.0353337	0.620581
Plk4	0.368273	4.74347	4.41988	0.0355224	0.621621
Nrp1	0.768292	2.81192	4.41644	0.0355942	0.621621
Scn2b	1.05551	-0.630172	4.41186	0.03569	0.621621
Hnrnph1	0.166189	9.41057	4.41157	0.0356959	0.621621
2210404O09Rik	0.41585	1.94124	4.40518	0.03583	0.623044
Nup107	0.171642	6.19361	4.38538	0.0362484	0.627872
Casp3	0.349898	5.56915	4.37553	0.0364586	0.628569
Ldlrad4	0.493804	2.48563	4.37395	0.0364923	0.628569
Endou	0.526328	4.71364	4.37232	0.0365272	0.628569
Tspan2	0.292104	5.66875	4.36515	0.0366812	0.628569
Ift81	0.478367	1.00946	4.36387	0.0367089	0.628569
Abhd6	0.320274	5.40741	4.36355	0.0367156	0.628569
Tardbp	0.169597	8.61787	4.36293	0.0367291	0.628569
Mtbp	0.23133	4.89274	4.35202	0.0369651	0.630619
Tacc2	0.30542	4.73638	4.35005	0.0370079	0.630619
Stk35	0.209548	5.07794	4.33372	0.0373645	0.63277
Fignl1	0.430915	5.25385	4.32488	0.0375591	0.63277
Galnt7	0.232449	4.58482	4.32164	0.0376307	0.63277
Rps6ka2	0.362643	2.48287	4.31917	0.0376852	0.63277
Agpat5	0.234934	4.47637	4.31277	0.0378272	0.63277
Nlrx1	0.385692	2.62358	4.30899	0.0379114	0.63277
Ndufaf2	0.365398	3.15427	4.30711	0.0379534	0.63277
Rsrc2	0.228313	7.11109	4.30567	0.0379855	0.63277
Dck	0.313679	6.07809	4.30349	0.0380342	0.63277
Gcsam	1.42207	-0.170872	4.29555	0.0382123	0.63277
Sema6d	0.621643	3.65552	4.29364	0.0382552	0.63277
Lrrc8b	0.329511	3.63615	4.28889	0.0383622	0.63277
Micall2	1.3414	-0.79753	4.28647	0.0384168	0.63277
1810046K07Rik	0.828372	1.25645	4.28211	0.0385155	0.63277
Oip5	0.718464	2.75708	4.28199	0.0385181	0.63277
Dock4	0.782526	0.825081	4.28186	0.0385212	0.63277
Ptger1	0.49718	1.88509	4.27944	0.0385759	0.63277
Map2	0.878014	2.01317	4.27357	0.0387095	0.63277
Pls1	0.986887	-0.00597741	4.2732	0.0387179	0.63277
Svil	0.362229	4.93238	4.26349	0.0389398	0.633364
Dzip3	0.257315	4.80933	4.26322	0.038946	0.633364
Pcolce	1.08279	0.672272	4.26176	0.0389795	0.633364
Timd2	0.649864	3.35236	4.25507	0.0391333	0.633675
Ddias	0.536837	2.60508	4.23616	0.0395717	0.634734
Eif4enif1	0.152132	7.26186	4.23604	0.0395744	0.634734
Slamf6	0.269806	6.59104	4.23078	0.0396973	0.634734
Kif18a	0.406524	3.15393	4.22548	0.0398213	0.634734
Cep152	0.229344	5.08763	4.22293	0.0398813	0.634734
Zfp808	0.352843	2.51284	4.2175	0.0400091	0.634734
Ccdc138	0.369178	2.49511	4.21685	0.0400244	0.634734
Col18a1	0.647084	-0.00382091	4.20565	0.0402896	0.638089
Col9a3	0.561088	1.73127	4.20004	0.0404231	0.638251
Pole	0.31314	6.02753	4.19756	0.0404822	0.638251
Ncapg2	0.510119	5.33924	4.19687	0.0404985	0.638251
Mllt4	0.898212	0.794378	4.1939	0.0405697	0.638275
Mxra8	0.426238	2.23747	4.18024	0.0408979	0.640499
Lrrcc1	0.231642	5.07596	4.16458	0.0412777	0.642325
Rad18	0.258373	4.71185	4.16114	0.0413615	0.642325
Pcyox1l	0.263496	3.65293	4.15094	0.0416115	0.642325
Neb	0.749057	-0.0340191	4.14797	0.0416846	0.642325
Etnk2	1.24578	0.263677	4.1477	0.0416912	0.642325
Retnlg	2.49766	0.702361	4.14329	0.0417998	0.6427
Loxl3	0.694649	1.30432	4.14233	0.0418236	0.6427
Hsp90aa1	0.176559	9.15345	4.13914	0.0419024	0.643081
Rdx	0.192515	7.22596	4.12593	0.0422308	0.644777
Itgae	0.715092	-0.215681	4.11906	0.0424027	0.644777
Lin9	0.226679	4.45472	4.11858	0.0424146	0.644777
Usp2	0.663446	0.909398	4.11659	0.0424647	0.644777
Usp1	0.199637	6.92056	4.11377	0.0425355	0.644777
Arhgap19	0.577682	4.3748	4.10817	0.0426765	0.644777
Rufy3	0.17982	5.44796	4.10654	0.0427177	0.644777
Ccne2	0.603953	3.53252	4.09828	0.0429268	0.647112
Bmpr2	0.486518	2.87223	4.08844	0.0431774	0.649243
Dlg1	0.147563	6.57074	4.08	0.0433937	0.649406
Nup155	0.211711	6.34674	4.06733	0.0437202	0.649406
Knstrn	0.448851	4.13113	4.06582	0.0437595	0.649406
Slc7a7	0.492514	3.78457	4.05749	0.0439758	0.649406
Acp1	0.205545	5.63001	4.05588	0.0440179	0.649406
Lbh	0.224291	9.06896	4.04339	0.0443445	0.649406
Rbl1	0.25447	6.09641	4.04215	0.0443772	0.649406
Zkscan3	0.260003	6.44106	4.03175	0.0446516	0.65088
Rrm1	0.304557	7.31304	4.02958	0.044709	0.65088
Prkcq	1.63229	-0.401966	4.02506	0.0448289	0.651828
Hspa4l	0.255412	4.65219	4.01411	0.045121	0.655273
Kif5a	1.16977	-0.286729	4.00852	0.0452708	0.655847
Ankrd61	0.712259	1.17419	3.99543	0.0456238	0.65614
Cep83	0.214791	5.60303	3.99356	0.0456744	0.65614
Chst1	1.53259	-0.839252	3.99325	0.0456828	0.65614
Chek1	0.335641	4.62823	3.99143	0.0457323	0.65614
Syngr4	0.738391	-0.822418	3.97699	0.0461259	0.658619
Fen1	0.32613	3.01808	3.96597	0.0464287	0.660348
Tgm4	0.947544	-0.538152	3.96535	0.0464458	0.660348
Atad5	0.349903	5.00981	3.96198	0.0465391	0.660348
Nasp	0.215817	6.94151	3.95544	0.0467201	0.66108
2310014L17Rik	0.78368	-0.327981	3.9512	0.0468379	0.66108
Ccdc173	0.537492	0.962678	3.95082	0.0468485	0.66108
Msh2	0.167188	6.24791	3.9506	0.0468548	0.66108
Nlgn2	0.551252	1.96809	3.94422	0.0470326	0.661273
Zcchc10	0.256099	4.30161	3.94413	0.0470352	0.661273
Mef2a	0.20544	6.78639	3.94008	0.0471486	0.661303
Hmgn5	0.261125	4.83039	3.92482	0.0475783	0.663547
Phf10	0.169218	5.69266	3.92398	0.047602	0.663547
Luzp1	0.387309	3.26761	3.91683	0.0478049	0.663547
Tnfsf18	0.693212	-0.199206	3.91436	0.0478753	0.663547
Ahnak	0.416666	5.44334	3.90919	0.0480228	0.663547
Cdc42bpa	1.01551	0.344726	3.90751	0.0480707	0.663547
Xkr5	0.891925	0.677645	3.9057	0.0481227	0.663547
Siglecf	1.3063	0.926825	3.90527	0.0481348	0.663547
Daam1	0.310235	3.25908	3.9049	0.0481454	0.663547
Runx1	0.182983	6.69667	3.89669	0.0483813	0.664269
Lnp	0.294549	4.4954	3.89645	0.0483883	0.664269
Spock2	0.738635	0.880161	3.89337	0.048477	0.664269
Eme1	0.535053	3.09001	3.88357	0.0487608	0.666327
Bhlhe41	0.577166	4.97537	3.88238	0.0487953	0.666327
Zfp157	0.257092	4.1348	3.86714	0.0492405	0.667398
Ipo11	0.205011	5.54759	3.85908	0.0494776	0.668403
Fam133b	0.178218	5.2953	3.85134	0.0497062	0.668403
Phlpp2	0.257442	5.6902	3.8479	0.0498082	0.668403
Gamt	0.975353	0.469307	3.84043	0.0500307	0.669201
Car12	0.649155	0.0512123	3.83895	0.0500747	0.669201
Il7r	1.18249	3.07961	3.82516	0.0504887	0.67322
Cenpi	0.606366	3.17301	3.82058	0.0506267	0.673542
Rabl3	0.225844	4.06508	3.8189	0.0506774	0.673542
Cdc25c	0.958516	1.83329	3.81873	0.0506827	0.673542
Spn	0.55194	6.0053	3.80676	0.0510461	0.676859
Slc35a3	0.264092	5.88709	3.80361	0.0511421	0.677092
Ostn	1.40953	-1.01493	3.80245	0.0511775	0.677092
Haus3	0.251891	4.80416	3.79632	0.0513654	0.678069
Cnot6	0.212415	7.6084	3.78927	0.051582	0.679421
Vwf	1.9591	0.327644	3.78507	0.0517116	0.679966
Brip1	0.616056	3.90142	3.78329	0.0517666	0.679966
Ptpla	1.23218	-0.760535	3.77759	0.0519435	0.681165
Akap5	0.533507	2.69517	3.77029	0.0521705	0.683388
Stau2	0.313289	3.19039	3.76803	0.0522412	0.683561
Atxn7l1	0.205638	5.43397	3.75609	0.0526156	0.683917
Zfp326	0.214592	5.17027	3.75347	0.0526979	0.683917
Cd27	0.404496	3.06885	3.75339	0.0527006	0.683917
Drosha	0.166034	5.75837	3.7514	0.0527634	0.683917
Tnfsf14	0.626125	3.21621	3.74951	0.0528229	0.683917
Ccdc43	0.202209	4.65873	3.74886	0.0528434	0.683917
Cerkl	0.52232	1.65455	3.74191	0.0530638	0.685278
Nrarp	0.574691	1.34246	3.73909	0.0531535	0.685692
Syce2	0.281545	3.47686	3.73566	0.0532628	0.686357
Sgol1	0.678156	3.14432	3.7334	0.0533348	0.686415
Ppig	0.201788	7.01132	3.7298	0.0534499	0.686415
Cbfa2t3	0.353521	6.29591	3.72026	0.053756	0.686709
Mlf1	1.01931	-0.866811	3.71892	0.053799	0.686709
Pcgf2	0.553005	1.0462	3.71853	0.0538118	0.686709
Golim4	0.266163	4.02648	3.71378	0.053965	0.686709
Nrgn	0.738452	5.41023	3.71264	0.0540019	0.686709
Ivns1abp	0.159893	8.6052	3.71081	0.0540612	0.686709
Lmbr1	0.565541	1.3182	3.71072	0.0540641	0.686709
Pi4k2b	0.254996	3.56757	3.70547	0.0542344	0.687349
Marcks	0.246253	8.13236	3.70436	0.0542706	0.687349
Crbn	0.190312	5.75291	3.70162	0.0543596	0.687349
Azin1	0.188668	6.95129	3.69125	0.0546987	0.687751
Zdhhc21	0.263037	5.42618	3.69118	0.0547009	0.687751
Ankrd27	0.161379	6.00635	3.6866	0.0548512	0.688185
Nin	0.287084	6.6571	3.68194	0.0550049	0.688934
Rfc1	0.151341	7.28276	3.67912	0.0550978	0.689099
Gnaq	0.242551	5.09922	3.66994	0.0554022	0.692179
BC068157	0.914937	-0.713913	3.64965	0.0560811	0.697835
Cpsf6	0.200529	7.75137	3.64662	0.0561831	0.697835
Lysmd2	0.618168	0.867555	3.64425	0.0562632	0.697835
Fkbp7	0.661504	0.608265	3.64186	0.0563438	0.697835
Zfhx3	1.10991	-0.622332	3.63626	0.0565338	0.697835
Tlcd2	0.456524	2.02726	3.63476	0.0565847	0.697835
Serpinf1	0.527818	1.67946	3.63474	0.0565854	0.697835
1700016K19Rik	2.06182	-0.895739	3.62952	0.0567632	0.697835
Cntrl	0.20847	7.59411	3.62299	0.0569863	0.697835
Dmd	0.503235	1.29632	3.62278	0.0569936	0.697835
Zfp125	0.290269	3.14093	3.62217	0.0570146	0.697835
Prdm10	0.246745	4.90767	3.61955	0.0571043	0.697835
Spred3	0.575637	0.570773	3.61702	0.0571913	0.697835
Numbl	0.465553	1.73882	3.61672	0.0572016	0.697835
Vrk1	0.155577	6.27237	3.61183	0.0573698	0.697835
mt-Cytb	0.455708	11.191	3.60425	0.0576321	0.697835
U2surp	0.17727	7.15972	3.604	0.0576406	0.697835
Sox5	0.776224	0.922996	3.60325	0.0576668	0.697835
Satb2	0.911964	-0.291851	3.60179	0.0577173	0.697835
Tnfsf9	0.443799	2.19021	3.60015	0.0577744	0.697835
Optn	0.268609	3.73852	3.5994	0.0578003	0.697835
Prkar2a	0.264372	4.34651	3.598	0.0578492	0.697835
Megf9	0.292961	3.3134	3.59798	0.0578498	0.697835
Foxm1	0.627849	5.01553	3.59018	0.0581219	0.698199
Zc3h12c	0.403403	5.00292	3.58657	0.0582482	0.698199
Rell1	0.43036	3.97838	3.58574	0.0582775	0.698199
Trim62	0.476915	1.80845	3.58201	0.0584085	0.698199
Metap2	0.16776	7.17512	3.57517	0.0586493	0.698199
Htr7	1.30868	-0.669953	3.57502	0.0586549	0.698199
Haus6	0.211359	5.50224	3.57207	0.058759	0.698199
Fancb	0.318814	2.96553	3.56768	0.0589147	0.699268
Bag2	0.53621	1.60467	3.56322	0.0590731	0.699268
Hist1h3i	0.844508	-1.0473	3.56279	0.0590883	0.699268
Smc5	0.200639	6.05257	3.55703	0.0592937	0.699642
Lrrfip1	0.16661	6.98122	3.55093	0.059512	0.701279
Maged1	0.398307	2.04727	3.54986	0.0595503	0.701279
Nupr1	1.10427	-0.45595	3.54364	0.059774	0.702184
Cdk2	0.209075	6.98366	3.54336	0.0597844	0.702184
Atxn1	0.286235	5.76266	3.54273	0.0598068	0.702184
Wdr90	0.253781	6.10735	3.54117	0.0598634	0.702184
Med14	0.264251	6.67284	3.53657	0.0600296	0.702748
Rasd1	0.595701	4.38889	3.53454	0.0601029	0.702914
Ticrr	0.482099	4.35727	3.53096	0.0602328	0.703741
Chaf1a	0.372696	5.52744	3.52598	0.060414	0.704211
Celsr2	0.477644	2.72994	3.52262	0.0605368	0.704211
Ska2	0.393027	3.51194	3.51805	0.060704	0.705038
Bicd1	0.453463	1.60717	3.51655	0.0607587	0.705038
Rnf150	0.446347	3.28118	3.50896	0.0610376	0.706895
Eno3	0.312247	6.8617	3.49989	0.061373	0.708022
Tmem38b	0.33359	3.24337	3.4948	0.0615617	0.708522
Rbm25	0.215087	8.3195	3.49218	0.0616592	0.708522
Tmx4	0.291993	4.41211	3.48917	0.0617717	0.708522
Ccar1	0.202068	7.11406	3.4873	0.0618415	0.708522
Ncapg	0.721625	4.40656	3.48706	0.0618504	0.708522
Smarca5	0.166927	7.9569	3.48592	0.0618929	0.708522
Kif2a	0.177817	5.42776	3.47869	0.0621639	0.710257
Suv39h2	0.320306	2.99806	3.47523	0.062294	0.710634
Nat8l	1.24476	0.329079	3.47305	0.0623761	0.710634
Cdc7	0.212748	5.33949	3.46618	0.0626357	0.712908
Dbf4	0.298828	4.79328	3.46083	0.0628388	0.71292
Ggn	0.889189	-0.467909	3.45771	0.0629576	0.71292
Acoxl	0.867754	0.253533	3.45522	0.0630524	0.71292
Kdm1b	0.208143	5.2371	3.45438	0.0630842	0.71292
Mphosph6	0.219304	4.43901	3.44896	0.0632918	0.71292
Fanca	0.326835	5.15812	3.44537	0.0634291	0.71292
Cblc	0.628243	-0.307601	3.44413	0.0634766	0.71292
Dars2	0.229874	4.76005	3.44406	0.0634796	0.71292
Sms	0.158731	7.17688	3.44379	0.0634899	0.71292
Ahcyl1	0.132823	7.31327	3.44235	0.0635451	0.71292
Prr15	0.942082	-0.830011	3.43961	0.0636506	0.71292
Pds5b	0.203751	6.53892	3.43792	0.0637157	0.71292
Hmgb3	0.313293	4.23474	3.43342	0.0638898	0.713133
Gcat	0.753638	0.31221	3.431	0.0639833	0.713231
Gm3055	0.472106	1.16023	3.42491	0.0642198	0.714671
Irf6	0.834868	-0.543737	3.42422	0.0642466	0.714671
Ckap5	0.185881	6.42987	3.42303	0.0642928	0.714671
Gtf2ird1	0.790204	1.07952	3.40542	0.0649827	0.720321
Sass6	0.289732	3.59456	3.39574	0.0653649	0.722538
Gclc	0.155897	6.40819	3.3894	0.0656169	0.723977
Wdr54	0.535391	-0.184379	3.38198	0.0659127	0.726566
2610020H08Rik	0.329743	3.08111	3.37226	0.0663029	0.728447
Hmmr	1.02671	3.3075	3.37163	0.0663282	0.728447
Slk	0.209075	6.34948	3.36632	0.066542	0.72921
E2f1	0.351322	5.16202	3.36517	0.0665886	0.72921
Ept1	0.230954	5.25955	3.36383	0.0666429	0.72921
Eif2s3y	0.236148	6.74792	3.35643	0.066943	0.73182
Rbbp8	0.200148	5.11578	3.34967	0.0672187	0.732883
Dlgap5	0.40896	4.34831	3.34824	0.0672768	0.732883
Zfp101	0.215167	4.21957	3.34614	0.0673629	0.732883
Zfp362	0.279063	7.0465	3.33143	0.0679679	0.734917
Npas4	0.989573	-0.530017	3.33121	0.0679766	0.734917
Eif5b	0.197401	7.53187	3.33109	0.0679817	0.734917
Spaca6	0.825647	-0.2991	3.32151	0.0683789	0.734917
Chek2	0.253789	4.17815	3.321	0.0684003	0.734917
Rabgap1l	0.21025	7.45552	3.31812	0.06852	0.735539
Cspp1	0.195585	5.16486	3.31489	0.0686548	0.736321
Usp49	0.360591	3.25469	3.31197	0.0687769	0.736371
Pfdn4	0.22946	4.06251	3.30416	0.0691048	0.738258
Ranbp9	0.142922	6.12595	3.30324	0.0691435	0.738258
Usp14	0.164263	6.07093	3.30054	0.069257	0.738258
Pkd2	1.48933	-0.751299	3.29951	0.0693005	0.738258
Wdr76	0.226009	5.10049	3.299	0.0693222	0.738258
Prkaa1	0.213347	5.31669	3.29619	0.0694406	0.738258
Ifng	0.851969	0.0430604	3.29376	0.0695436	0.738258
Cdca8	0.642828	4.65314	3.29348	0.0695555	0.738258
Nsl1	0.479222	3.78526	3.29345	0.0695566	0.738258
Spred1	0.408749	4.00887	3.29172	0.0696301	0.738258
Rmi1	0.164262	5.39459	3.28239	0.0700267	0.739506
Uaca	1.27788	-0.793083	3.28136	0.0700709	0.739506
Lrtm2	0.580833	0.965654	3.27464	0.0703583	0.74081
Cenpa	0.307327	6.54134	3.27369	0.0703989	0.74081
6330409D20Rik	0.780186	0.567898	3.27265	0.0704436	0.74081
Aplp2	0.194095	6.24835	3.26898	0.0706017	0.741064
Trib1	0.252723	5.10985	3.26724	0.0706766	0.741064
Ccdc18	0.425349	1.83777	3.2663	0.0707169	0.741064
Hmgb2	0.495022	7.67644	3.26052	0.0709664	0.742537
Brd8	0.17027	7.27276	3.26016	0.0709824	0.742537
Tnfaip8	0.154892	6.96593	3.24598	0.071599	0.747017
Pelp1	0.157868	6.3121	3.23751	0.0719698	0.748395
Mob1b	0.273282	5.48864	3.23622	0.0720267	0.748395
Alpk1	0.563598	2.46094	3.23372	0.0721367	0.748395
Wnk2	0.853839	-0.840904	3.23159	0.0722305	0.748395
Dclre1c	0.234046	5.41058	3.2315	0.0722346	0.748395
Rpgr	0.301773	2.76975	3.22891	0.0723487	0.748494
Ptpn3	0.891583	0.836463	3.22803	0.0723879	0.748494
Golgb1	0.214677	6.38992	3.22385	0.0725726	0.748494
Ppp1r26	0.712719	-0.419315	3.22348	0.0725893	0.748494
Arl15	0.289354	2.84533	3.2205	0.0727213	0.748494
Mb21d1	0.424122	1.93515	3.2189	0.0727926	0.748494
Nln	0.19667	5.03046	3.21761	0.0728501	0.748494
Cep128	0.260858	4.39211	3.21417	0.0730034	0.748494
S100a8	1.85197	2.14253	3.21371	0.0730239	0.748494
Dna2	0.503175	3.81348	3.21311	0.0730505	0.748494
Cd3g	1.00877	-0.414172	3.21285	0.0730622	0.748494
Als2cl	1.45297	0.112106	3.20728	0.0733112	0.750399
Bbs5	0.442316	0.471971	3.2008	0.0736021	0.751267
Wnt16	1.18044	-1.05579	3.19507	0.0738608	0.751267
Lmln	0.372654	2.06585	3.19384	0.0739161	0.751267
Msi1	0.545824	0.770552	3.19279	0.0739638	0.751267
Cbx5	0.203531	7.50385	3.19047	0.0740688	0.751267
Kpna3	0.176791	6.52819	3.18679	0.0742358	0.751267
Ldlrad3	0.455511	2.41179	3.18631	0.0742575	0.751267
Rab27a	0.240191	4.96766	3.18324	0.0743972	0.751267
Tmco1	0.19332	5.31946	3.18015	0.0745381	0.751267
Bcl2l11	0.211008	7.93227	3.17636	0.0747111	0.751267
Ppfibp1	0.257017	4.20757	3.17428	0.0748063	0.751267
Tnfrsf21	0.459522	3.27719	3.17003	0.0750012	0.751267
Ckap4	0.227417	4.72753	3.16981	0.0750114	0.751267
Tmeff1	0.64182	0.907059	3.16803	0.0750929	0.751267
Myo1a	0.7369	-0.264127	3.16575	0.0751978	0.751267
Zfand4	0.465054	1.63277	3.16051	0.0754398	0.751267
Spint1	0.805966	0.0395454	3.15621	0.0756385	0.751267
Lpar3	0.92841	-0.246071	3.15588	0.0756541	0.751267
Tubgcp5	0.182365	5.29377	3.15587	0.0756545	0.751267
Tex9	0.293495	3.56305	3.15517	0.0756867	0.751267
Mcm6	0.182299	8.11864	3.1503	0.0759131	0.751267
Mafa	1.25817	-0.606277	3.14832	0.0760053	0.751267
Sash1	0.639557	2.68964	3.14738	0.0760489	0.751267
Gnas	0.263195	6.25286	3.14466	0.076176	0.751898
1110032F04Rik	0.851277	-0.422037	3.1432	0.0762441	0.751946
Lgalsl	0.444529	0.854629	3.14076	0.0763584	0.752167
Nfatc2ip	0.207971	5.75722	3.1394	0.0764218	0.752167
Nae1	0.173848	5.68102	3.13782	0.0764959	0.752167
Cldn15	0.732855	-0.563546	3.13628	0.0765685	0.752167
Pkn3	0.397209	2.20466	3.13463	0.0766459	0.752167
Pitpnc1	0.239163	4.70919	3.12776	0.0769695	0.752167
Mis18bp1	0.505596	3.32975	3.12772	0.0769714	0.752167
Tg	0.550331	1.81045	3.12699	0.0770056	0.752167
Tmem57	0.157413	5.79183	3.1242	0.0771379	0.752167
Fam229b	0.595717	0.219498	3.11302	0.0776688	0.752167
Tipin	0.228737	5.45988	3.11279	0.0776796	0.752167
Pold3	0.163564	6.44013	3.11108	0.0777613	0.752167
Cep192	0.214477	6.28435	3.10791	0.0779129	0.752167
Zfp280c	0.231286	5.28086	3.10663	0.0779739	0.752167
Ocln	0.7974	-0.917677	3.10524	0.0780408	0.752167
2021-09-11	0.173447	8.27952	3.10327	0.0781352	0.752167
Mki67	0.926523	6.76794	3.09807	0.0783852	0.752167
Ube2t	0.353446	2.96727	3.09805	0.0783861	0.752167
Smim24	0.614008	2.42643	3.09702	0.0784356	0.752167
Il6	1.03512	-0.658791	3.0932	0.07862	0.752167
Kif23	0.658214	4.3349	3.09319	0.0786205	0.752167
Naip6	0.450595	2.77606	3.08976	0.0787865	0.752167
Cav2	1.24988	-0.230344	3.08972	0.0787882	0.752167
Tanc1	0.368702	1.47051	3.0896	0.078794	0.752167
E2f7	0.819116	2.80798	3.08726	0.0789077	0.752167
Mad1l1	0.253764	4.63327	3.08698	0.0789213	0.752167
Paxbp1	0.182578	6.65767	3.08448	0.0790425	0.752167
Fam72a	0.462432	1.2961	3.07569	0.0794711	0.752167
Ssb	0.158659	7.39038	3.07491	0.0795089	0.752167
Lag3	0.494686	4.1279	3.07228	0.0796377	0.752167
Agbl1	0.933209	-0.795938	3.07149	0.0796765	0.752167
Nyap1	0.755876	0.0443013	3.07101	0.0797001	0.752167
Xpo1	0.1695	8.04364	3.0699	0.0797542	0.752167
Slc25a13	0.528114	2.97478	3.0681	0.0798429	0.752167
Pja2	0.194129	5.67013	3.06093	0.0801956	0.752167
Nudt4	0.217558	5.40723	3.05888	0.080297	0.752167
Tagln2	0.264652	8.28717	3.0577	0.0803553	0.752167
Mcm3	0.207278	8.10462	3.05642	0.0804186	0.752167
Trpm5	0.596809	2.46985	3.05624	0.0804278	0.752167
Olfr164	0.645947	2.2938	3.05583	0.0804476	0.752167
Grhl1	0.256026	3.76696	3.05208	0.0806337	0.752167
Rps6kb1	0.166685	6.26448	3.04996	0.0807392	0.752167
Casp8ap2	0.234228	5.96054	3.04899	0.0807873	0.752167
Plekhm2	0.227254	5.58561	3.04873	0.0808001	0.752167
Ifitm2	0.473312	4.12743	3.0473	0.0808713	0.752167
Epb4.1l2	0.141826	7.47972	3.04717	0.0808779	0.752167
Rad54l	0.420997	4.7759	3.04406	0.081033	0.752167
Bub1	0.778335	3.94691	3.04368	0.0810522	0.752167
Hspb7	0.53829	-0.160223	3.04247	0.0811124	0.752167
Fads3	1.10384	0.343476	3.04171	0.0811504	0.752167
AU019823	0.144028	5.36521	3.03944	0.0812638	0.752167
Mfsd7b	0.236632	4.13832	3.03863	0.0813047	0.752167
Adarb1	0.331524	3.41515	3.03563	0.081455	0.752167
Ckap2	0.712568	2.96494	3.03343	0.0815652	0.752167
Cenpn	0.485036	3.77322	3.03143	0.0816658	0.752388
Zfp827	0.481247	4.43594	3.02725	0.0818767	0.753747
Itga6	0.254546	4.82068	3.02287	0.0820982	0.755202
Csnk1e	0.291623	4.97596	3.01972	0.0822574	0.756082
Paxip1	0.138024	6.49459	3.01431	0.0825326	0.757083
Prpf40a	0.208267	7.27108	3.01289	0.082605	0.757083
Gm15821	0.494861	1.79138	3.01258	0.0826209	0.757083
Fanci	0.310543	4.2074	3.00698	0.0829064	0.75901
Ndufab1	0.170205	5.71094	3.00323	0.0830985	0.75912
Cdc42ep3	0.343051	3.72457	2.99719	0.0834091	0.760788
A430105I19Rik	1.68199	-0.939715	2.99352	0.0835983	0.761346
Rfwd3	0.17787	6.90579	2.98774	0.083897	0.761567
Ndrg4	0.868702	0.454379	2.98519	0.0840292	0.761567
Rhot1	0.145323	5.69248	2.98439	0.0840707	0.761567
Prim2	0.250513	4.67323	2.979	0.0843514	0.762737
Fbxo24	1.02374	0.0685175	2.97822	0.0843922	0.762737
Sall2	0.455455	0.603459	2.97668	0.0844723	0.762834
Spc25	0.503444	3.36914	2.97264	0.0846835	0.76305
Tmtc4	0.239987	4.14806	2.96708	0.0849753	0.7651
Tmem65	0.240617	3.74064	2.96537	0.0850651	0.765329
Fads2	0.959148	2.31501	2.95602	0.0855582	0.767644
Sptbn4	0.598976	0.528769	2.95531	0.085596	0.767644
2900026A02Rik	0.732917	3.99972	2.95189	0.0857771	0.767669
Aspm	0.865086	3.54426	2.94393	0.0862007	0.769146
Ybx2	0.963902	-0.27014	2.9425	0.0862772	0.769251
Tbc1d24	0.425777	2.38301	2.94041	0.086389	0.769671
Timeless	0.195044	6.55154	2.93713	0.0865645	0.769746
Tmtc3	0.407349	2.43961	2.93674	0.0865852	0.769746
Lhx2	0.63029	-0.609779	2.92746	0.0870846	0.771256
Krcc1	0.177337	5.84775	2.92641	0.0871413	0.771256
Sox4	0.683381	3.97531	2.92522	0.0872055	0.771256
Cdkn2c	0.436337	4.30537	2.92233	0.0873616	0.771256
Edem1	0.174441	7.68719	2.92138	0.0874132	0.771256
Net1	0.197665	5.496	2.92116	0.087425	0.771256
Pkd2l2	0.247826	3.67513	2.92045	0.0874635	0.771256
Ccdc34	0.349244	3.86177	2.92024	0.0874747	0.771256
Cx3cl1	0.727973	0.707182	2.9168	0.0876614	0.771758
Reck	0.608163	-0.0975619	2.90958	0.0880546	0.774377
Ryk	0.61283	0.575282	2.90884	0.0880951	0.774377
Snx16	0.371083	2.00789	2.90656	0.0882197	0.774377
Sh3bgrl2	0.641167	1.56768	2.90566	0.0882692	0.774377
Creb5	1.47586	-0.955467	2.90461	0.0883265	0.774377
Il4i1	0.785668	-0.470785	2.90144	0.0885006	0.774559
Lig1	0.266336	7.18699	2.89826	0.0886753	0.774952
4930427A07Rik	0.347439	4.50379	2.89825	0.0886758	0.774952
Exo1	0.325187	4.39853	2.89094	0.0890788	0.775251
Dnajc2	0.163661	6.70602	2.89042	0.0891077	0.775251
Tet2	0.334071	6.14037	2.88684	0.0893061	0.775251
C330027C09Rik	0.481755	4.24027	2.88462	0.0894293	0.775251
Gas7	1.33016	2.75762	2.88096	0.0896324	0.775251
Tra2a	0.170958	7.24657	2.88048	0.0896593	0.775251
Atrx	0.302735	8.24093	2.8793	0.0897248	0.775251
Lipo1	0.219084	3.57858	2.87823	0.0897845	0.775251
Alms1	0.320068	3.73476	2.87796	0.0897998	0.775251
H1f0	0.774337	3.47486	2.87695	0.0898561	0.775251
Epas1	0.730819	-0.34814	2.87573	0.0899241	0.775251
Ptpn14	0.465798	3.46874	2.86671	0.0904295	0.77604
Slc9a5	0.343189	3.32064	2.86167	0.0907135	0.77604
Rad51c	0.294553	3.57064	2.86078	0.0907633	0.77604
Klra2	2.28452	-1.09045	2.86009	0.0908024	0.77604
Ntng2	0.40183	2.68963	2.8596	0.0908302	0.77604
Rac1	0.119671	7.65827	2.85619	0.0910228	0.77604
Rad51	0.354831	5.17638	2.85257	0.0912281	0.77604
Glis2	0.609286	0.0301684	2.85166	0.0912796	0.77604
Gm10521	0.362882	3.18553	2.84135	0.0918668	0.778805
Ktn1	0.1578	7.1145	2.83703	0.0921146	0.778859
Ssrp1	0.132093	8.61407	2.83342	0.0923215	0.778859
Abcc5	0.202672	5.93948	2.83297	0.0923474	0.778859
Ccdc14	0.253409	3.36183	2.83192	0.0924077	0.778859
D15Ertd621e	0.253125	6.36786	2.83055	0.0924865	0.778859
Xndc1	0.298371	4.40916	2.81905	0.0931513	0.781012
Bard1	0.518585	3.89069	2.81713	0.0932632	0.781012
Rmdn1	0.24819	2.93011	2.80933	0.0937174	0.781012
Sik3	0.147743	6.63563	2.80912	0.0937295	0.781012
Kif15	0.579564	4.72095	2.80701	0.0938531	0.781012
Tfrc	0.25167	7.61115	2.805	0.0939708	0.781012
5730508B09Rik	0.246164	3.54767	2.8027	0.0941057	0.781012
Pola2	0.210951	6.31005	2.80161	0.09417	0.781012
Adal	0.226919	4.04573	2.8016	0.0941704	0.781012
Sdpr	2.06986	-1.32378	2.80088	0.0942126	0.781012
Arhgap32	1.05989	0.23543	2.80014	0.0942563	0.781012
Ncapd2	0.372699	7.07523	2.7995	0.094294	0.781012
Slc9a9	0.590281	1.46746	2.79586	0.0945083	0.781698
Inppl1	0.301829	5.39078	2.79138	0.0947727	0.78329
Diap3	0.448942	3.8554	2.7901	0.0948483	0.78329
Rilpl1	0.621091	1.53764	2.7884	0.0949488	0.78329
Mcm9	0.171137	5.15347	2.78494	0.0951544	0.78329
Ubash3a	1.0982	-0.616217	2.78412	0.095203	0.78329
Egr2	0.240059	6.69078	2.78364	0.0952318	0.78329
Rbak	0.227955	4.49991	2.77982	0.0954588	0.78329
Fxr1	0.135748	6.40025	2.77875	0.0955226	0.78329
Znhit3	0.215765	3.6396	2.77811	0.0955607	0.78329
Rhno1	0.184448	5.54162	2.77784	0.0955768	0.78329
Prr11	0.768472	2.80855	2.77603	0.0956851	0.78329
Lmnb1	0.333163	7.27139	2.77532	0.0957273	0.78329
Amigo1	0.397832	2.75719	2.77471	0.0957638	0.78329
Apbb1ip	0.125655	6.94924	2.77088	0.0959936	0.78329
Zbed4	0.172643	5.02098	2.77047	0.0960179	0.78329
Phf19	0.318566	4.48412	2.76883	0.0961162	0.783531
Rpa1	0.164822	7.62682	2.76648	0.0962575	0.783531
Ltf	2.10412	1.21952	2.76255	0.0964942	0.783531
Cyfip1	0.190561	5.79659	2.76101	0.0965873	0.783531
Sh3bgr	0.885948	0.241937	2.76032	0.0966289	0.783531
St3gal5	0.477768	3.38405	2.75979	0.096661	0.783531
Ckap2l	0.77085	3.7262	2.75966	0.096669	0.783531
Zfp110	0.173898	6.10113	2.75527	0.0969344	0.784845
Gltp	0.208817	6.31585	2.7511	0.0971873	0.785092
Mbnl2	0.201784	5.98518	2.74742	0.0974117	0.785092
Scarb1	0.316867	4.85477	2.74639	0.0974746	0.785092
Hmgcll1	0.546091	1.25971	2.7434	0.0976571	0.785092
Stk32c	0.712413	-0.676716	2.73875	0.0979414	0.785643
Pds5a	0.197916	8.00063	2.73848	0.0979576	0.785643
Ago3	0.287205	5.23473	2.73711	0.0980418	0.785708
Rtf1	0.171975	6.98199	2.73373	0.0982493	0.785708
Pxylp1	0.58277	1.33346	2.73321	0.0982818	0.785708
Kcnk6	0.430181	3.19551	2.73291	0.0983002	0.785708
Tmem263	0.16848	4.90369	2.7291	0.0985349	0.785708
Lgr5	1.17128	1.43959	2.72542	0.0987622	0.785907
Cep55	0.505651	3.86273	2.72156	0.099001	0.785907
Camp	1.88433	0.31005	2.71946	0.0991316	0.785907
Has3	0.441727	1.39101	2.71918	0.0991492	0.785907
Pcnp	0.123948	6.47127	2.71897	0.0991621	0.785907
Rarg	0.601913	1.74408	2.71786	0.0992313	0.785907
Tns1	0.739917	2.5795	2.71764	0.0992448	0.785907
Zfp455	0.266349	2.54044	2.71076	0.0996735	0.785907
Dcbld2	0.463484	0.610951	2.71	0.0997213	0.785907
Metrn	0.448816	0.591113	2.70954	0.0997497	0.785907
Lmo4	0.321366	5.94314	2.70799	0.0998466	0.785907
Tjp2	0.369405	4.01279	2.70715	0.0998996	0.785907
Cfap45	0.43156	1.98695	2.70534	0.100013	0.785907
Sertad4	2.27784	0.429838	2.70389	0.100104	0.785907
Tmpo	0.172494	7.85408	2.69898	0.100412	0.785907
Tyro3	0.581326	-0.238503	2.69872	0.100429	0.785907
Ctnnbip1	0.446666	1.58492	2.69862	0.100435	0.785907
Rragd	0.432965	2.08587	2.69424	0.100712	0.78692
Dnajc21	0.182621	5.16163	2.68319	0.101412	0.789396
Pim1	0.300742	6.4294	2.67802	0.101742	0.790479
Kifc3	0.66492	0.985061	2.67599	0.101872	0.790479
Prm1	1.71944	-1.19311	2.67581	0.101884	0.790479
Bcr	0.219616	5.20914	2.67274	0.10208	0.790689
Mpp6	0.183511	5.28538	2.67116	0.102181	0.790689
Wdr26	0.144012	8.948	2.67065	0.102214	0.790689
Lefty1	0.881101	-0.146788	2.66753	0.102415	0.790689
Wsb2	0.191923	5.3102	2.66439	0.102617	0.790689
Fam174b	1.31261	-0.858674	2.66437	0.102619	0.790689
Cpd	0.382028	4.87629	2.6634	0.102681	0.790689
Dtl	0.413347	5.85707	2.66195	0.102775	0.790689
Tex14	0.984947	-0.902837	2.65984	0.102911	0.790953
Cenpe	0.60288	4.23861	2.6573	0.103075	0.790953
Pole2	0.198927	3.98438	2.65402	0.103288	0.791781
Zfp703	0.345529	3.92885	2.65294	0.103359	0.791781
Arhgef6	0.176741	8.02608	2.64958	0.103577	0.791781
Eif3a	0.195867	8.96107	2.64717	0.103735	0.791781
Tspan6	0.437083	0.630112	2.64584	0.103821	0.791781
Dlg3	0.252803	3.2162	2.64351	0.103974	0.791781
Tdp2	0.141946	5.56503	2.64217	0.104061	0.791781
Gm20604	0.422338	1.66584	2.64135	0.104115	0.791781
Wdr60	0.30657	2.56513	2.63948	0.104238	0.791945
Man2a2	0.167701	7.86995	2.63823	0.10432	0.791945
3425401B19Rik	0.714345	0.727743	2.63765	0.104358	0.791945
Mtfr2	0.624186	2.51123	2.63389	0.104605	0.792328
mt-Nd1	0.273901	11.1287	2.63272	0.104683	0.792328
Gm5595	0.302815	1.87809	2.63189	0.104737	0.792328
Tmem98	0.981375	-0.0649268	2.62929	0.104909	0.792328
Ncoa1	0.212761	6.09174	2.62907	0.104923	0.792328
Myo6	0.400115	1.29695	2.62509	0.105186	0.792328
Kif20a	0.593763	4.02117	2.61918	0.105579	0.793875
Atp2b4	0.802001	1.49113	2.61741	0.105697	0.794163
Stox2	0.982875	0.734559	2.61132	0.106103	0.794429
Bclaf1	0.145645	7.91225	2.60946	0.106228	0.794429
Bhlhb9	0.189262	4.23086	2.60756	0.106355	0.794429
Apold1	0.485982	0.134203	2.60694	0.106397	0.794429
Ccnb2	0.866047	3.41804	2.60413	0.106586	0.794429
Ccdc40	0.543373	-0.387091	2.60189	0.106736	0.794429
Rilp	0.544937	0.0656539	2.60008	0.106858	0.794429
Tfdp1	0.313768	6.97619	2.59929	0.106911	0.794429
Qk	0.195107	7.08162	2.59918	0.106919	0.794429
Wdr89	0.275073	4.28677	2.59543	0.107172	0.794429
Cchcr1	0.341922	4.41847	2.5936	0.107296	0.794429
Lrp8	0.725311	2.77775	2.593	0.107337	0.794429
Prkar2b	0.725435	1.83234	2.59214	0.107395	0.794429
Tbc1d9	0.462641	3.14395	2.58787	0.107685	0.794429
Tmem240	0.67646	0.83131	2.58714	0.107734	0.794429
Rbm39	0.139644	9.05756	2.587	0.107744	0.794429
Syncrip	0.168134	7.96738	2.58504	0.107878	0.794429
Anln	0.770295	2.76457	2.58191	0.108091	0.794429
Gm2237	0.384524	1.54655	2.57998	0.108223	0.794429
Arhgap21	0.207627	5.08163	2.57958	0.10825	0.794429
Adssl1	0.486781	3.97481	2.57842	0.10833	0.794429
Ndc1	0.192999	4.97714	2.57552	0.108528	0.794429
Npat	0.214288	5.45913	2.57487	0.108573	0.794429
Serpine2	1.16935	-0.0670209	2.57446	0.108601	0.794429
Tmc7	0.903566	-0.005907	2.57252	0.108735	0.794429
Cd81	0.161828	7.42192	2.5724	0.108743	0.794429
Tmem180	0.419677	2.01819	2.57072	0.108858	0.794429
Racgap1	0.555539	5.01713	2.57052	0.108872	0.794429
Aurkb	0.500709	5.14015	2.56575	0.109201	0.795369
Incenp	0.443458	5.92492	2.55818	0.109725	0.798206
Pik3r6	0.680455	2.35037	2.54895	0.110367	0.801419
Haus2	0.160076	4.81325	2.54737	0.110478	0.801419
Neil3	0.947712	3.07782	2.54701	0.110503	0.801419
Bub1b	0.412433	5.57882	2.54233	0.110831	0.802994
6030419C18Rik	0.368141	1.0387	2.54102	0.110923	0.802994
Zfp942	0.205155	4.55694	2.53529	0.111327	0.805425
Depdc1a	0.662585	2.44548	2.53283	0.1115	0.80619
Tmem191c	0.333741	3.08405	2.5297	0.111721	0.8073
Cd200	0.218632	5.44341	2.52775	0.111859	0.807455
Mfng	0.179697	6.41617	2.5234	0.112169	0.808623
Cenph	0.408839	3.71727	2.5211	0.112332	0.808781
Ncs1	0.373013	1.72315	2.51768	0.112576	0.808838
Katnbl1	0.201152	4.05221	2.51646	0.112663	0.808838
Kit	0.648119	3.40476	2.51518	0.112754	0.808838
Ifih1	0.60818	3.66799	2.51272	0.112931	0.808838
Gm8251	0.762926	0.351076	2.50979	0.113141	0.808838
9530077C05Rik	0.605491	1.06033	2.50975	0.113144	0.808838
Mtap7d3	0.496214	-0.067189	2.50968	0.113149	0.808838
Olfm1	1.1384	0.0963105	2.50966	0.11315	0.808838
Casc4	0.240652	3.72359	2.49869	0.113941	0.811111
Mcm4	0.359859	7.46783	2.49187	0.114435	0.812187
Cebpg	0.167661	6.02221	2.48892	0.11465	0.812187
Pgap2	0.178028	4.86985	2.48721	0.114775	0.812187
Lalba	1.10725	-0.595476	2.47819	0.115435	0.813537
C2	0.430236	1.12003	2.47761	0.115477	0.813537
Ttc33	0.161399	4.78472	2.47407	0.115738	0.813537
Thrap3	0.120146	8.75138	2.47388	0.115752	0.813537
Eps8l2	1.131	-0.704197	2.47299	0.115817	0.813537
Wdr53	0.227944	3.55566	2.47142	0.115933	0.813537
Clec2g	0.523932	1.31622	2.47138	0.115936	0.813537
Zfp280d	0.157147	5.50993	2.46655	0.116293	0.814599
Rad51ap1	0.451948	4.22722	2.4633	0.116533	0.815802
Lrrc1	0.231837	3.52899	2.46061	0.116734	0.816724
Inpp5b	0.129044	5.91733	2.45447	0.117191	0.817559
Mcm7	0.200842	7.98375	2.45436	0.117199	0.817559
Cth	0.386431	0.632753	2.44987	0.117534	0.817559
Dnmt3a	0.209812	6.93342	2.44922	0.117583	0.817559
Hilpda	0.262817	3.38584	2.44726	0.11773	0.817924
Trim2	1.21197	-0.0411098	2.44411	0.117967	0.818053
Hypk	0.35953	1.98224	2.44137	0.118173	0.818053
Dock5	0.573416	1.98983	2.44011	0.118268	0.818053
Gdpd3	0.44228	1.51485	2.43932	0.118328	0.818053
Tirap	0.194206	4.57008	2.43816	0.118415	0.818053
Espl1	0.714214	4.8126	2.43708	0.118497	0.818053
Cenpl	0.37316	3.28847	2.43544	0.118621	0.818371
Bdh1	0.239685	3.5988	2.43337	0.118778	0.818393
Fbxo45	0.171036	4.98161	2.43267	0.11883	0.818393
Gas2l3	0.563916	2.09152	2.42733	0.119236	0.820064
Tmem41a	0.312436	1.69537	2.42328	0.119545	0.820064
Lekr1	0.340332	1.22233	2.42236	0.119615	0.820064
Ppwd1	0.181897	4.58756	2.41884	0.119884	0.820064
1700025G04Rik	0.812903	-0.217675	2.41512	0.120169	0.820064
Ncaph	0.483147	5.09456	2.41389	0.120263	0.820064
Orc6	0.23666	4.91174	2.40736	0.120766	0.820723
Vcl	0.26366	4.89615	2.40679	0.12081	0.820723
Zfr	0.155771	7.03605	2.40637	0.120843	0.820723
Mcmbp	0.111149	6.9685	2.40613	0.120861	0.820723
Cxcr6	1.04333	-0.627412	2.40211	0.121172	0.821179
Rims3	0.771303	0.74232	2.40166	0.121206	0.821179
Ifitm6	1.9615	-0.582035	2.40135	0.12123	0.821179
Dusp19	0.270767	2.64031	2.39857	0.121446	0.821663
Trim24	0.175974	5.80105	2.38924	0.122173	0.82355
Smek1	0.136114	7.22223	2.38571	0.122449	0.82355
Cyb5rl	0.201318	4.19355	2.38197	0.122742	0.824032
Ankrd9	0.292902	2.75809	2.38023	0.122879	0.824323
Cep41	0.199678	3.70103	2.37541	0.123259	0.826058
Trip13	0.285219	4.13549	2.37519	0.123277	0.826058
Smarcc1	0.160598	7.35687	2.36643	0.12397	0.829304
Fam161a	0.398864	1.10996	2.36397	0.124166	0.830146
Rnf144b	1.11534	0.702224	2.3614	0.124371	0.830581
Hace1	0.167634	4.68237	2.35744	0.124687	0.831008
Med8	0.169078	5.63187	2.3546	0.124914	0.831008
C920021L13Rik	0.371387	2.30567	2.35361	0.124993	0.831008
Rcbtb2	0.195286	4.74808	2.35202	0.125121	0.831008
Nap1l1	0.139614	9.3074	2.35065	0.125231	0.831008
Nudt17	0.520091	0.968316	2.34755	0.12548	0.831008
Srek1	0.157606	6.35125	2.34679	0.125541	0.831008
Dpp4	0.22794	6.65707	2.34584	0.125618	0.831008
Axin2	0.785627	-0.454367	2.34384	0.125779	0.831008
Iqcb1	0.18729	4.22383	2.3432	0.125831	0.831008
Mbnl3	0.246634	4.23148	2.34228	0.125905	0.831008
Islr2	1.52225	-0.467848	2.33997	0.126092	0.831008
Pcyt1b	0.531123	0.164978	2.33923	0.126152	0.831008
Cir1	0.169835	4.78576	2.3382	0.126235	0.831008
Plxnc1	0.185128	7.37038	2.33615	0.126402	0.831008
Dbn1	0.623769	1.16026	2.33482	0.126509	0.831008
Epb4.1l4b	0.921515	0.773983	2.3316	0.126772	0.831008
Depdc1b	0.889072	0.950815	2.33098	0.126822	0.831008
Pfkfb3	0.274732	6.64677	2.32936	0.126954	0.831008
Asf1b	0.397431	4.98487	2.32905	0.12698	0.831008
Esf1	0.21283	5.29592	2.32334	0.127446	0.831008
Lima1	0.5798	1.84999	2.32001	0.127719	0.831008
BC049352	0.683825	0.32163	2.31891	0.127809	0.831008
Ggnbp1	0.255941	3.04824	2.31767	0.127912	0.831008
Cep162	0.198205	4.54616	2.31598	0.128051	0.831008
Slamf7	0.128553	6.89167	2.31589	0.128058	0.831008
Prpf4b	0.192945	8.03838	2.31539	0.128099	0.831008
Ccdc77	0.18317	4.48485	2.31528	0.128109	0.831008
Zfyve21	0.262145	3.0396	2.31449	0.128173	0.831008
Gyk	0.211378	4.17877	2.31385	0.128226	0.831008
Ssbp3	0.226946	5.16381	2.31047	0.128505	0.831008
Hbs1l	0.114739	5.8886	2.30723	0.128774	0.831008
Fam102b	0.232089	4.45424	2.30699	0.128794	0.831008
Kif11	0.723238	5.49514	2.30648	0.128835	0.831008
Kcnh7	0.617103	0.278576	2.30535	0.12893	0.831008
Rbm14	0.135514	6.46457	2.30507	0.128953	0.831008
Tex15	0.57116	-0.385648	2.3034	0.129091	0.831008
Zswim7	0.25598	2.71077	2.30188	0.129217	0.831008
Zcchc4	0.16206	4.68781	2.30106	0.129286	0.831008
Gtf2e2	0.194759	4.66178	2.29994	0.129379	0.831008
C2cd2l	0.200519	4.64586	2.29974	0.129395	0.831008
Arhgap23	0.442929	2.58991	2.29604	0.129704	0.832094
Cdca7l	0.220438	4.30932	2.2906	0.13016	0.834117
Dync2h1	0.220108	4.2778	2.28913	0.130283	0.834458
Diap2	0.226036	4.45336	2.28718	0.130447	0.834667
Tfg	0.147328	5.60295	2.2837	0.13074	0.83537
Tgs1	0.15629	6.07033	2.28247	0.130843	0.83537
Gen1	0.345249	3.52191	2.28243	0.130847	0.83537
Kifc1	0.612429	3.91511	2.28034	0.131024	0.835438
Tubgcp3	0.126497	6.43104	2.28011	0.131043	0.835438
1700048O20Rik	0.459452	2.11429	2.27747	0.131266	0.83625
Diablo	0.216118	3.68311	2.2757	0.131416	0.836637
Gng12	0.215456	4.33222	2.27416	0.131546	0.836637
Rab8b	0.204768	7.0856	2.27378	0.131578	0.836637
Klhl32	0.520812	-0.433691	2.27296	0.131648	0.836637
Nphp1	0.313056	1.75765	2.27173	0.131753	0.836663
Ttf2	0.164391	5.48138	2.27075	0.131836	0.836746
Gga1	0.395748	6.42081	2.26864	0.132016	0.83744
Phka2	0.159365	5.25363	2.26506	0.132321	0.838083
Cep295	0.200654	5.73966	2.26181	0.132599	0.839052
Cul7	0.184797	4.48471	2.2571	0.133003	0.839744
Rpgrip1	0.211532	5.4122	2.25231	0.133415	0.839744
Tube1	0.273584	3.21605	2.24628	0.133936	0.839744
Zfp947	0.499618	-0.0693205	2.24355	0.134173	0.839744
Slamf9	0.263493	4.87024	2.2407	0.13442	0.839744
Cers5	0.123379	6.14964	2.24062	0.134427	0.839744
Efnb2	0.569031	1.49545	2.24019	0.134465	0.839744
Wfdc21	0.781477	1.37149	2.2398	0.134498	0.839744
Trim15	0.722999	-0.857876	2.23977	0.134501	0.839744
Slc6a8	0.668563	0.182676	2.2376	0.13469	0.839744
1810055G02Rik	0.281744	2.59696	2.23594	0.134835	0.839744
Dennd2c	1.15423	-0.617805	2.23566	0.134859	0.839744
Hinfp	0.146434	5.69998	2.2355	0.134873	0.839744
Kif4	0.649	3.68841	2.234	0.135004	0.839744
Ss18	0.122777	6.34949	2.2316	0.135214	0.839744
St13	0.132939	7.90288	2.23152	0.135221	0.839744
Pot1a	0.152616	5.22449	2.23143	0.135228	0.839744
Gpat2	1.15989	-0.123918	2.2314	0.135232	0.839744
Srsf6	0.0971469	8.8548	2.22958	0.135391	0.839744
Ttc19	0.163661	4.39526	2.2287	0.135468	0.839744
Naa16	0.135594	5.24192	2.22849	0.135486	0.839744
Ric3	0.681398	-0.726079	2.22411	0.135871	0.839816
Cyp39a1	0.378653	2.50279	2.21675	0.13652	0.839816
Slc25a42	0.321238	3.54527	2.2141	0.136755	0.839816
Ipo9	0.108337	6.89691	2.21385	0.136777	0.839816
Trim68	0.240047	4.2509	2.21317	0.136837	0.839816
Cenpf	0.936124	3.29744	2.21275	0.136874	0.839816
Chn2	0.743916	0.491772	2.21256	0.136891	0.839816
Ece1	0.160754	5.17439	2.21099	0.13703	0.839816
AC168977.1	0.893195	2.63313	2.20889	0.137217	0.839816
Stk39	0.691073	1.14276	2.20887	0.137219	0.839816
Heatr9	0.784538	-0.59285	2.20606	0.13747	0.839961
Nes	1.01038	-1.19689	2.20472	0.137589	0.840085
Stx2	0.27548	3.84363	2.1974	0.138244	0.841607
C2cd5	0.148734	6.1552	2.19623	0.138349	0.841607
Rrnad1	0.156094	5.69597	2.19426	0.138526	0.841607
Zc3h7a	0.136024	7.4912	2.19377	0.13857	0.841607
Ccdc91	0.215043	3.62004	2.19325	0.138617	0.841607
Hykk	0.668419	-0.463063	2.19119	0.138802	0.841851
Lpl	0.937139	2.68447	2.1866	0.139216	0.841894
Sgsm1	2.04992	-1.29695	2.18629	0.139245	0.841894
Cntrob	0.161792	5.57074	2.18486	0.139374	0.841894
Srsf10	0.12719	8.0321	2.18403	0.139449	0.841894
Zbtb32	0.399012	3.41885	2.18347	0.139499	0.841894
2810417H13Rik	0.664153	6.49811	2.18076	0.139746	0.842379
Pigh	0.246425	3.18939	2.17983	0.13983	0.842379
Abcf1	0.12783	7.72631	2.17829	0.13997	0.842379
Slc35d3	1.34851	0.162718	2.17671	0.140113	0.842379
Ppp6r3	0.110638	7.20706	2.16932	0.140788	0.842379
Sf1	0.0871623	9.15556	2.16908	0.14081	0.842379
Stil	0.573009	3.68456	2.16724	0.140979	0.842379
Slco3a1	1.02999	0.845325	2.16623	0.141071	0.842379
Sbf2	0.286888	4.51539	2.16612	0.141082	0.842379
Alkbh4	0.203816	4.287	2.1646	0.141221	0.842379
Rag2	2.32177	0.0480757	2.16438	0.141242	0.842379
Prg3	1.86882	-0.0366422	2.16306	0.141363	0.842379
Katnal1	0.260306	3.23955	2.16173	0.141485	0.842379
Shcbp1	0.5703	3.55631	2.15276	0.142314	0.842379
Mapre1	0.0996183	7.80769	2.15225	0.142361	0.842379
Ccdc28b	0.361272	4.8714	2.15194	0.14239	0.842379
Dscc1	0.334064	3.36612	2.14864	0.142697	0.842379
Fam221a	0.431138	2.23338	2.14854	0.142706	0.842379
Rbm26	0.203426	6.89151	2.14756	0.142797	0.842379
Aco1	0.124087	5.61734	2.14551	0.142988	0.842379
Dnajb9	0.17638	4.63707	2.14291	0.14323	0.842379
Armcx6	0.329705	1.55893	2.14241	0.143277	0.842379
Slco5a1	0.394005	3.18275	2.14135	0.143376	0.842379
Sh3rf1	0.250058	3.63044	2.13996	0.143506	0.842379
Chordc1	0.139192	6.47867	2.1394	0.143558	0.842379
Fgd4	1.13873	0.382197	2.13746	0.14374	0.842379
Oscp1	0.530524	0.272128	2.13642	0.143837	0.842379
Abhd10	0.194069	3.6034	2.13618	0.14386	0.842379
Ado	0.132317	5.68563	2.13422	0.144044	0.842379
Top2a	0.638281	7.23487	2.13341	0.14412	0.842379
Leo1	0.16913	4.98856	2.13085	0.144361	0.842379
Sowahc	0.275598	3.86838	2.1285	0.144582	0.842379
Zcchc8	0.114507	6.44261	2.12808	0.144622	0.842379
Troap	0.638392	2.54891	2.12747	0.144679	0.842379
Tdrkh	0.407268	1.24612	2.12141	0.145253	0.842379
Pspn	0.586239	-0.626251	2.12082	0.145308	0.842379
Nedd1	0.139306	5.16615	2.11586	0.14578	0.842379
Gpr56	1.1203	2.92953	2.1156	0.145805	0.842379
Foxk2	0.119377	6.43686	2.11512	0.14585	0.842379
Gm13212	0.284454	4.67006	2.1145	0.145909	0.842379
Fam122a	0.15299	5.00114	2.1145	0.14591	0.842379
Cdc45	0.360426	4.98143	2.1119	0.146158	0.842379
Spag5	0.687967	4.36505	2.11167	0.14618	0.842379
Cenpu	0.30196	2.63686	2.11116	0.146228	0.842379
Olfml2b	1.0705	-1.04024	2.10557	0.146764	0.843909
Mpp5	0.19018	4.83582	2.10491	0.146827	0.843909
Zfp207	0.113111	8.09309	2.10444	0.146872	0.843909
Carhsp1	0.190736	5.69738	2.09928	0.147369	0.84457
Hist1h2ai	0.483022	-0.194644	2.09891	0.147404	0.84457
Nras	0.134295	6.78098	2.09469	0.147812	0.84457
Dtymk	0.167908	6.45918	2.0944	0.14784	0.84457
Zbtb45	0.171678	4.69109	2.09368	0.14791	0.84457
F9	0.500092	1.07148	2.0926	0.148014	0.84457
Prc1	0.593568	3.94133	2.09201	0.148071	0.84457
Setd8	0.155791	6.26012	2.09104	0.148165	0.84457
Rtn4	0.127017	6.8646	2.08828	0.148433	0.845123
Creb3l2	0.225232	4.52618	2.08529	0.148724	0.845169
Enpp6	0.582323	-0.055873	2.08453	0.148798	0.845169
Ywhah	0.163598	7.54502	2.08262	0.148984	0.845169
Lrrc20	0.188174	4.46178	2.08046	0.149195	0.845169
Cenpk	0.497383	2.76806	2.08015	0.149225	0.845169
Spred2	0.224638	3.57064	2.07881	0.149356	0.845169
Brd4	0.126564	8.06514	2.07755	0.14948	0.845169
3110057O12Rik	0.233154	3.40042	2.07627	0.149605	0.845169
Mphosph8	0.159914	5.65638	2.07605	0.149627	0.845169
Sh3d21	0.575966	0.0522673	2.07471	0.149759	0.845169
mt-Nd4l	0.363466	2.63919	2.0722	0.150005	0.845171
Esco2	0.663004	3.52718	2.06987	0.150234	0.845171
Larp7	0.161072	6.21108	2.06974	0.150247	0.845171
Rif1	0.23588	6.34267	2.0686	0.15036	0.845171
Zc3h18	0.100228	7.24777	2.06737	0.150481	0.845228
Dut	0.262716	6.43775	2.06705	0.150512	0.845228
Rab34	0.433617	-0.160214	2.06593	0.150623	0.845453
Bora	0.214588	4.2559	2.06297	0.150916	0.846382
Hipk3	0.222151	7.10919	2.06021	0.151189	0.847043
Gmcl1	0.139528	5.35129	2.06019	0.151192	0.847043
Zfp82	0.573194	0.168009	2.05832	0.151377	0.847285
Gpr12	1.87558	-0.599936	2.05281	0.151925	0.849153
St5	0.962174	0.300953	2.05149	0.152057	0.849376
Taf9b	0.166164	3.87087	2.05044	0.152163	0.849376
Lpar6	0.2421	3.61112	2.04848	0.152358	0.849376
Idi1	0.228906	5.70517	2.04796	0.15241	0.849376
Socs2	0.489927	3.00279	2.0474	0.152467	0.849376
Tmem218	0.275855	2.01807	2.04639	0.152567	0.849376
Cbx6	0.292083	6.1194	2.04611	0.152596	0.849376
Atp1b1	0.75663	5.05223	2.04454	0.152753	0.849376
Cstf2	0.147221	6.50934	2.0444	0.152767	0.849376
Sirpa	0.514071	6.58651	2.04285	0.152923	0.849376
Cnih1	0.176863	5.27668	2.04154	0.153055	0.849376
Akap17b	0.297791	2.41631	2.04101	0.153108	0.849376
Hsp90b1	0.154077	9.00035	2.0369	0.153523	0.850446
Tmem194	0.180738	5.36799	2.03556	0.153657	0.850446
Nusap1	0.723842	4.45378	2.03462	0.153753	0.850446
Pnisr	0.198241	8.26266	2.03414	0.153801	0.850446
Bnip2	0.105274	6.56864	2.0316	0.154058	0.850905
Fosl2	0.517054	2.80021	2.0291	0.154312	0.850905
Anp32b	0.167087	8.72792	2.02887	0.154336	0.850905
Odf2	0.111856	6.5698	2.0283	0.154394	0.850905
Prdx4	0.210682	4.46131	2.02783	0.154441	0.850905
Lphn1	0.420983	4.58076	2.02511	0.154718	0.850905
Gm17296	0.18203	5.25061	2.02218	0.155016	0.850905
Hirip3	0.21	5.91097	2.02212	0.155023	0.850905
Padi4	1.32231	0.692383	2.01716	0.15553	0.852084
Hdlbp	0.101102	7.97033	2.01443	0.15581	0.852381
Itsn1	0.227412	4.86585	2.01277	0.15598	0.852381
Rag1	1.61397	4.32092	2.01264	0.155993	0.852381
Sin3a	0.121326	7.09461	2.01217	0.156042	0.852381
Hn1l	0.124822	5.65817	2.01145	0.156116	0.852381
Fah	0.336315	2.00675	2.00688	0.156588	0.852381
Zcrb1	0.151863	5.47511	2.00048	0.15725	0.855183
Nid2	0.518495	0.434187	1.99913	0.15739	0.855183
Ctc1	0.157944	6.15395	1.99691	0.157621	0.856046
Polr2a	0.151901	8.93827	1.99451	0.157871	0.856621
Rbm44	0.483546	1.55932	1.9943	0.157892	0.856621
Kif24	0.282104	2.95458	1.99312	0.158015	0.856621
Vcan	0.910923	0.776468	1.98955	0.158388	0.857864
Tmcc3	0.237316	5.19167	1.98028	0.159361	0.859417
Kif14	0.754455	2.96863	1.98026	0.159363	0.859417
Adss	0.105123	7.12587	1.98008	0.159382	0.859417
Sord	0.518732	2.78052	1.97794	0.159608	0.859577
Ulk4	0.548883	-0.541392	1.97759	0.159644	0.859577
Pask	0.367241	4.28325	1.97624	0.159787	0.859665
Jrkl	0.179927	4.60581	1.97607	0.159805	0.859665
Tigit	0.514839	0.230327	1.9735	0.160077	0.860254
Ccnb1	0.599067	4.03385	1.9723	0.160204	0.860254
Ube2q2	0.136754	5.57936	1.96984	0.160464	0.861265
Gpatch8	0.156567	6.72893	1.96794	0.160667	0.861962
Tshz1	0.158424	5.30588	1.96462	0.16102	0.862212
Kntc1	0.421114	4.98394	1.9643	0.161054	0.862212
Abi2	0.236498	3.44502	1.96268	0.161227	0.862212
Rapgef3	0.21833	3.92805	1.96163	0.161339	0.862212
Rcor2	0.370604	1.81934	1.95913	0.161607	0.862212
Rrm2	0.632367	6.08832	1.95859	0.161664	0.862212
Suv39h1	0.173542	5.62467	1.95821	0.161705	0.862212
Mcur1	0.11988	6.04164	1.95613	0.161928	0.862378
Phf2	0.108609	7.06448	1.95595	0.161947	0.862378
Ccdc112	0.269308	2.69347	1.95567	0.161977	0.862378
Ptrhd1	0.212433	2.6055	1.9534	0.162221	0.862521
Helq	0.143125	5.04059	1.94957	0.162633	0.863798
Ttyh3	0.166707	7.8907	1.94841	0.162759	0.863798
Nid1	0.336762	4.42479	1.94708	0.162902	0.863798
Smarca4	0.131724	8.08353	1.94679	0.162933	0.863798
Tnfaip8l1	0.447641	0.584741	1.94645	0.16297	0.863798
Fhit	0.409777	0.2119	1.934	0.164321	0.868236
Flt1	0.503531	-0.0127752	1.93136	0.16461	0.868236
Cd209a	1.06411	0.0819708	1.92916	0.164851	0.868236
Csf2rb	0.48345	5.71868	1.9261	0.165185	0.868236
Cmtm4	0.236616	2.86329	1.92186	0.165652	0.869625
Wac	0.109241	7.07735	1.92033	0.165821	0.869625
Ly6k	0.378581	1.06252	1.92015	0.165841	0.869625
Tnnt1	0.857404	-0.478981	1.91963	0.165897	0.869625
Mast4	0.215493	5.58812	1.91735	0.166149	0.870177
Adcy9	0.56533	0.932802	1.91283	0.166649	0.871264
Plod2	0.767662	-0.792204	1.90608	0.1674	0.871293
Ylpm1	0.173	6.77966	1.90582	0.167428	0.871293
Zkscan7	0.230175	3.49384	1.90452	0.167574	0.871293
Rasa2	0.189445	6.32241	1.90422	0.167607	0.871293
Snx4	0.123405	6.05791	1.90373	0.167662	0.871293
Ptgfrn	1.24647	-0.446223	1.90132	0.16793	0.871829
Cbx1	0.11296	6.90286	1.8982	0.168279	0.872909
Cars2	0.148052	5.44987	1.89368	0.168787	0.872909
Clip1	0.155241	5.70117	1.89329	0.168832	0.872909
Asap2	0.226634	2.93969	1.89316	0.168846	0.872909
Rpa2	0.16199	6.12356	1.88495	0.169773	0.874889
Ppp4r2	0.118056	7.22331	1.88432	0.169843	0.874889
Myzap	0.287567	2.80455	1.88068	0.170257	0.876262
Pcx	0.282296	2.24832	1.87937	0.170406	0.876484
Acvr2a	0.267676	2.80346	1.879	0.170448	0.876484
Recql4	0.253826	4.26008	1.87667	0.170713	0.876687
Enox2	0.177306	4.18119	1.87657	0.170725	0.876687
Tmem209	0.129286	5.69565	1.87551	0.170845	0.876687
Pak6	0.568245	-0.491034	1.8753	0.170869	0.876687
Ell2	0.175215	5.22015	1.87328	0.1711	0.876806
Ubqln2	0.1242	5.73638	1.87166	0.171285	0.877062
Nek2	0.669603	3.50928	1.87129	0.171328	0.877062
Hemgn	0.452616	-0.220145	1.87026	0.171445	0.877062
Rtel1	0.130507	6.42385	1.86361	0.172208	0.87975
Mcm5	0.170521	8.10359	1.86258	0.172328	0.87975
Pcnxl2	1.08699	0.0461131	1.86247	0.17234	0.87975
Cep135	0.175303	5.43387	1.85783	0.172875	0.880191
Egfl8	0.555445	-0.137149	1.85595	0.173093	0.880191
Baiap2	0.227678	5.28954	1.85442	0.173271	0.880191
Pde1c	0.781482	-0.624715	1.85434	0.17328	0.880191
Tmem14a	0.536934	0.351644	1.85346	0.173382	0.880191
Pitpnm2	0.174675	6.59668	1.8534	0.173389	0.880191
Hectd2	0.510583	-0.213285	1.85143	0.173617	0.880247
Arsi	0.551516	-0.954554	1.84839	0.173971	0.880889
5830462I19Rik	0.596108	0.0731008	1.847	0.174133	0.881334
Hat1	0.166409	6.1972	1.84524	0.174337	0.88162
Bglap3	1.67755	0.711142	1.84325	0.174571	0.881784
Luc7l3	0.150514	7.79471	1.84149	0.174777	0.881967
Iqgap3	0.740218	3.17999	1.83933	0.17503	0.882006
Lpgat1	0.148512	7.37776	1.83803	0.175182	0.882006
Wsb1	0.135653	7.19418	1.838	0.175186	0.882006
Rtkn2	0.811956	-0.0950182	1.8367	0.175338	0.882006
Dnajc3	0.116048	6.64008	1.83537	0.175495	0.882006
Col11a2	0.290071	4.08175	1.83505	0.175533	0.882006
Gpsm2	0.629625	0.987262	1.83429	0.175622	0.882006
Lrr1	0.525618	1.92825	1.83408	0.175646	0.882006
Cse1l	0.114714	7.47637	1.83124	0.175981	0.882427
Crisp1	2.04254	-0.48368	1.83086	0.176025	0.882427
Wdr66	0.713087	-0.511941	1.8308	0.176033	0.882427
Fuom	0.401253	0.182752	1.8295	0.176186	0.882427
Lbr	0.149085	7.67361	1.82652	0.176539	0.882708
Ndc80	0.316149	4.53903	1.8265	0.176542	0.882708
Nono	0.090801	8.65935	1.82637	0.176556	0.882708
Cdc20	0.47285	4.30646	1.82151	0.177134	0.884406
Zfp184	0.440708	0.251029	1.81958	0.177364	0.884406
Cenpt	0.243414	4.66198	1.81879	0.177457	0.884406
Zfp825	0.205239	3.41667	1.8185	0.177491	0.884406
Retsat	0.228021	2.61035	1.81626	0.177759	0.884406
Twf1	0.139808	4.93078	1.81602	0.177788	0.884406
Ctdspl2	0.194171	5.71982	1.8134	0.178101	0.884635
Fgf13	0.380513	1.88494	1.81262	0.178195	0.884635
Ptpn12	0.196544	4.63496	1.80916	0.17861	0.884635
Cdc42ep4	0.415837	2.18689	1.80747	0.178812	0.884635
Nfat5	0.282354	7.72732	1.80464	0.179153	0.884635
Mcm10	0.389645	4.99255	1.80453	0.179166	0.884635
Tm9sf2	0.100233	7.40369	1.8041	0.179218	0.884635
Usp15	0.0960155	6.65742	1.80402	0.179227	0.884635
Thbd	0.765269	1.74214	1.8011	0.179579	0.884635
Vps54	0.146973	6.37424	1.80054	0.179647	0.884635
Igf1r	0.359589	4.159	1.80021	0.179687	0.884635
Cpox	0.153684	5.66217	1.80017	0.179692	0.884635
Nuf2	0.686334	3.86536	1.80014	0.179696	0.884635
Ints7	0.142505	7.26349	1.79916	0.179813	0.884635
BC030867	0.573887	3.0873	1.79916	0.179814	0.884635
F11r	0.485124	0.517235	1.79807	0.179946	0.884635
Traip	0.343763	3.75312	1.79756	0.180008	0.884635
Dusp8	1.59882	0.085099	1.79717	0.180055	0.884635
Tpra1	0.151969	5.61798	1.79628	0.180163	0.884635
Fam189b	0.226619	3.66658	1.79616	0.180177	0.884635
Ppp1r2	0.123892	6.05231	1.79585	0.180215	0.884635
Snrnp48	0.125685	6.67789	1.79469	0.180355	0.884635
Proser1	0.144211	5.73529	1.79402	0.180438	0.884635
Rbmx	0.126792	6.68478	1.78943	0.180996	0.885214
Nrg4	0.376953	1.16578	1.78844	0.181117	0.885214
Cacna1d	0.291836	4.02927	1.78365	0.181701	0.885214
Tanc2	0.436971	1.92323	1.78261	0.181829	0.885214
Trub1	0.169252	5.01297	1.78255	0.181837	0.885214
Hist1h2ae	0.442122	0.617754	1.77735	0.182475	0.885214
Ahrr	0.637903	2.28788	1.77467	0.182805	0.885214
Asf1a	0.21038	4.28713	1.77391	0.182898	0.885214
Ramp1	0.947171	0.971253	1.77361	0.182936	0.885214
Birc2	0.128805	6.57064	1.77283	0.183032	0.885214
Abca3	0.146663	6.29286	1.77279	0.183037	0.885214
Dusp23	0.252214	2.16393	1.77238	0.183088	0.885214
Gm9821	0.323239	4.11568	1.77094	0.183266	0.885214
Tet1	0.548578	1.47654	1.76992	0.183392	0.885214
Zfp445	0.191351	7.58191	1.7682	0.183605	0.885214
Usp46	0.196622	3.44889	1.76799	0.183631	0.885214
Tyms	0.416788	4.74838	1.76676	0.183783	0.885214
Zdhhc16	0.135121	4.86161	1.7664	0.183828	0.885214
Zfp91	0.0990087	7.37044	1.7659	0.183891	0.885214
Oprd1	1.14424	-0.049573	1.76436	0.184082	0.885214
Aebp2	0.1243	7.4615	1.76261	0.1843	0.885214
Scmh1	0.144146	4.95791	1.76213	0.184359	0.885214
Ccdc78	0.410426	0.660277	1.76015	0.184605	0.885214
Ttk	0.57909	3.12616	1.75991	0.184635	0.885214
Pgrmc1	0.149645	5.65383	1.75978	0.184652	0.885214
Slc36a4	0.36571	3.6007	1.75973	0.184658	0.885214
Card10	0.567174	0.120999	1.75576	0.185154	0.885214
Tex30	0.177955	4.19386	1.75569	0.185164	0.885214
Gemin6	0.158584	3.97316	1.75556	0.185179	0.885214
Capza1	0.105614	7.95997	1.75553	0.185183	0.885214
0610010F05Rik	0.178565	4.15124	1.75453	0.185308	0.885214
Clspn	0.574817	4.83268	1.75306	0.185493	0.885214
Slc22a17	0.410965	2.00263	1.75214	0.185607	0.885214
Gas2	0.293146	2.0711	1.75117	0.18573	0.885214
Capza2	0.08595	7.59465	1.75051	0.185813	0.885214
Asl	0.165875	4.64685	1.75039	0.185828	0.885214
Ccp110	0.183293	5.04835	1.75005	0.185871	0.885214
Slc6a12	0.996278	-0.286287	1.7484	0.186078	0.885214
Anp32a	0.159273	8.0824	1.74816	0.186108	0.885214
Nup85	0.140366	6.60182	1.74504	0.186502	0.886384
Prim1	0.190391	5.57702	1.74375	0.186664	0.886384
R3hdm1	0.126942	6.64828	1.74278	0.186787	0.886384
Mrpl18	0.211707	5.20891	1.74093	0.187021	0.886384
Mybl2	0.4139	5.27854	1.74037	0.187092	0.886384
Gemin8	0.281686	2.43755	1.73807	0.187384	0.886384
Anxa9	0.332486	1.07672	1.73789	0.187407	0.886384
Aicda	0.826082	0.294112	1.73757	0.187447	0.886384
Lad1	0.515326	2.83387	1.73511	0.187759	0.886384
Luc7l2	0.169393	8.75092	1.73492	0.187784	0.886384
Kdelc2	0.538322	1.18643	1.7348	0.187799	0.886384
Ralbp1	0.113418	6.83632	1.72372	0.189214	0.888651
Cnep1r1	0.140255	4.72366	1.72113	0.189548	0.888651
Rad51d	0.130785	5.03469	1.71948	0.189761	0.888651
Oosp1	0.308286	1.00646	1.71655	0.190138	0.888651
Cenpo	0.163314	4.45061	1.71569	0.190248	0.888651
Wdr37	0.137264	5.64441	1.71531	0.190298	0.888651
Rad50	0.127281	6.15723	1.71507	0.190328	0.888651
Nedd4	0.458485	4.99303	1.71441	0.190415	0.888651
Fer	0.637191	-0.678537	1.71422	0.190439	0.888651
Armcx4	0.516028	1.756	1.7134	0.190544	0.888651
Cdkn3	0.789904	1.1736	1.71304	0.190591	0.888651
Tfcp2	0.174192	3.94588	1.71296	0.190602	0.888651
Tmx1	0.131035	6.22511	1.70858	0.19117	0.888651
Fn1	1.34668	1.96437	1.70775	0.191278	0.888651
Rcor1	0.151618	6.43267	1.70571	0.191542	0.888651
Fut8	0.201904	4.4881	1.70536	0.191589	0.888651
Igf2bp3	0.651719	2.89774	1.70409	0.191755	0.888651
Fcamr	0.292299	6.05499	1.70333	0.191853	0.888651
Hdac7	0.14137	8.63536	1.70269	0.191937	0.888651
Cramp1l	0.146311	6.19027	1.70254	0.191956	0.888651
Iws1	0.149582	6.81749	1.70211	0.192013	0.888651
P2rx7	0.483805	1.71263	1.70042	0.192232	0.888651
Naa50	0.148557	7.53133	1.69554	0.192873	0.888651
Naf1	0.150345	4.67635	1.69376	0.193106	0.888651
Chmp5	0.116266	5.3605	1.69292	0.193216	0.888651
Syngap1	0.349488	1.29157	1.69134	0.193424	0.888651
Orc1	0.205233	3.73902	1.69099	0.193471	0.888651
Dhx9	0.131969	8.84133	1.69034	0.193556	0.888651
Ppip5k2	0.161723	6.67166	1.69015	0.193581	0.888651
Ubap2	0.13685	7.01039	1.69012	0.193585	0.888651
Adrbk2	0.432105	3.76154	1.68957	0.193658	0.888651
Sec61a2	0.217148	3.98011	1.68936	0.193685	0.888651
4933440N22Rik	0.290867	1.74665	1.68933	0.19369	0.888651
Celf2	0.175216	8.07302	1.68722	0.193968	0.888651
Agap1	0.688343	0.531828	1.68637	0.194081	0.888651
Hap1	0.424506	3.05399	1.68408	0.194383	0.88957
Neurl1b	0.818729	-0.0920637	1.67961	0.194976	0.890657
E2f8	0.716095	4.23201	1.67834	0.195146	0.890657
Dab2	1.14116	-0.437111	1.67761	0.195243	0.890657
Tmem220	0.47062	0.371647	1.67625	0.195424	0.890657
Fam76b	0.143418	7.00316	1.67093	0.196135	0.890657
1700109H08Rik	0.331991	2.59759	1.66987	0.196277	0.890657
Klc1	0.0973626	6.46568	1.66712	0.196645	0.890657
Oxct1	0.138888	7.11469	1.66498	0.196932	0.890657
Kpna4	0.121299	7.20795	1.66253	0.197262	0.890657
Ephb6	0.625125	-0.132351	1.66253	0.197262	0.890657
Cdc14a	0.189113	5.21171	1.66157	0.197392	0.890657
Ercc6l2	0.208645	5.4547	1.66145	0.197408	0.890657
Ccrn4l	0.209165	3.45951	1.66118	0.197444	0.890657
Ms4a7	0.653928	0.686576	1.66078	0.197498	0.890657
Car2	0.51671	4.02719	1.6607	0.197509	0.890657
Prpf4	0.123979	5.95843	1.66043	0.197545	0.890657
Dock9	0.174467	5.41314	1.65967	0.197648	0.890657
Slc5a3	0.301513	3.10209	1.65911	0.197723	0.890657
Enkd1	0.319211	2.94827	1.65879	0.197767	0.890657
Ms4a3	1.5894	-0.356122	1.65714	0.197989	0.890657
Orc2	0.148091	5.43043	1.65602	0.198142	0.890657
Zfp551	0.382596	1.2897	1.65455	0.198341	0.890657
Itga1	1.26558	-0.0489155	1.6536	0.198469	0.890657
Gstz1	0.184591	4.68007	1.65355	0.198477	0.890657
Ugt1a7c	1.01155	0.395273	1.6505	0.198891	0.890657
Homer1	0.163496	5.3886	1.65031	0.198917	0.890657
Ccsap	0.180311	3.42688	1.6502	0.198932	0.890657
Vps26b	0.208201	3.98658	1.64996	0.198964	0.890657
Cd244	0.329665	2.40398	1.64819	0.199206	0.891305
Znrd1as	0.311678	1.19202	1.64588	0.199521	0.891607
Matk	0.34031	4.39182	1.64466	0.199687	0.891607
Arhgap28	0.682929	-0.223206	1.64414	0.199758	0.891607
Dnaja4	0.722745	-0.957502	1.64408	0.199766	0.891607
BC035044	0.220736	4.7751	1.64115	0.200168	0.891832
Cep170	0.207174	6.09394	1.64049	0.200258	0.891832
Tcf19	0.449621	4.74515	1.64035	0.200278	0.891832
mt-Nd5	0.207676	10.7018	1.63725	0.200703	0.891832
Top1	0.134743	7.39224	1.63625	0.20084	0.891832
Gng11	0.738362	-0.505907	1.6359	0.200888	0.891832
Zmym3	0.133513	6.18579	1.63403	0.201146	0.891832
Senp1	0.110603	6.6256	1.63268	0.201333	0.891832
Hnrnpa1	0.106841	10.3084	1.63064	0.201614	0.891832
Prob1	0.203654	3.015	1.62839	0.201925	0.891832
Rbms1	0.130244	6.52785	1.62797	0.201984	0.891832
Zdhhc9	0.146348	4.92325	1.62737	0.202067	0.891832
Usf2	0.185756	6.58722	1.62547	0.20233	0.891832
Cenpw	0.28017	2.95333	1.62536	0.202345	0.891832
Pom121	0.145743	7.04603	1.62532	0.202351	0.891832
Tmem132e	1.63766	0.599167	1.62315	0.202653	0.891832
Gm10762	0.289711	1.53147	1.62241	0.202756	0.891832
Gle1	0.101333	6.05599	1.6211	0.202938	0.891832
Bicd2	0.115064	6.28518	1.61943	0.203171	0.891832
Pdk3	0.18887	5.86811	1.61933	0.203185	0.891832
Adamts7	0.936746	1.03216	1.61883	0.203255	0.891832
Lrrc58	0.172192	5.78781	1.61858	0.20329	0.891832
Thoc2	0.215353	7.07311	1.61755	0.203434	0.891832
Aunip	0.524562	2.00061	1.61684	0.203533	0.891832
Tapt1	0.159188	6.45105	1.61653	0.203576	0.891832
Srsf3	0.089064	8.71793	1.61651	0.203579	0.891832
Rmi2	0.307126	4.1828	1.61233	0.204165	0.891832
Pdhx	0.135212	4.31182	1.61232	0.204166	0.891832
Matn2	0.755342	-0.755173	1.61162	0.204265	0.891832
Tmem164	0.185323	5.9357	1.61133	0.204306	0.891832
Metrnl	0.549287	1.43173	1.611	0.204351	0.891832
Myb	0.589466	6.18994	1.6098	0.20452	0.891832
Ly75	0.206425	5.45615	1.6097	0.204534	0.891832
Ankrd10	0.107843	7.00884	1.60954	0.204556	0.891832
Ear1	1.38799	0.998136	1.60655	0.204978	0.891832
Eno1b	0.391622	0.291833	1.60487	0.205215	0.891832
Kif1b	0.198264	4.08536	1.60455	0.205259	0.891832
Tcerg1	0.112591	7.13298	1.60346	0.205414	0.891832
Pik3cb	0.411049	2.15087	1.60321	0.205448	0.891832
Rsph10b	0.37087	0.910523	1.60165	0.205669	0.891832
Fbxo5	0.246336	4.64009	1.60102	0.205759	0.891832
Rasal2	0.357983	2.0501	1.59748	0.20626	0.891832
Gp5	1.67549	-1.10741	1.59595	0.206478	0.891832
Fbxo3	0.120455	6.0186	1.59525	0.206577	0.891832
Slc12a3	0.650087	1.52562	1.5944	0.206699	0.891832
Wls	0.206145	4.7266	1.59431	0.206712	0.891832
Cdca2	0.512757	3.93722	1.59267	0.206945	0.891832
Ywhae	0.125548	8.39715	1.59243	0.206979	0.891832
Cdk1	0.601974	4.4881	1.5916	0.207098	0.891832
Cmc2	0.268822	3.06631	1.59077	0.207216	0.891832
Sec23ip	0.101162	6.08103	1.59049	0.207255	0.891832
2021-03-08	0.470143	2.44561	1.59001	0.207324	0.891832
Cxx1a	0.311568	1.46248	1.58956	0.207388	0.891832
Cdca3	0.627965	4.19669	1.58866	0.207518	0.891832
R3hcc1l	0.140688	4.84513	1.58662	0.20781	0.891832
Usp11	0.15085	5.9082	1.5865	0.207826	0.891832
Fads1	0.334876	4.4481	1.58609	0.207886	0.891832
Stmn1	0.427693	6.59179	1.5855	0.20797	0.891832
Taf15	0.116955	7.6009	1.58534	0.207994	0.891832
2021-09-02	0.287295	2.16628	1.5848	0.20807	0.891832
Lonrf3	0.600719	0.033413	1.58383	0.20821	0.891832
Tnfsf8	0.508889	-0.703212	1.58337	0.208276	0.891832
Fnbp4	0.0966471	8.02292	1.58255	0.208394	0.891832
Lims1	0.111238	6.59263	1.58157	0.208535	0.891832
Bcl7a	0.193797	6.92288	1.58121	0.208586	0.891832
Impad1	0.179919	5.57921	1.57801	0.209047	0.891832
Calu	0.102258	6.61243	1.57797	0.209053	0.891832
Atxn7	0.184628	6.23631	1.57679	0.209223	0.891832
Tmod1	1.12418	0.493831	1.57679	0.209224	0.891832
Dip2a	0.169594	3.89679	1.57535	0.209431	0.891832
Lxn	0.372459	2.41152	1.57508	0.20947	0.891832
Cenpv	0.374849	2.79357	1.57493	0.209493	0.891832
Lancl2	0.157648	4.51583	1.57444	0.209563	0.891832
Mapkap1	0.119341	5.93431	1.57322	0.209739	0.891832
Star	0.236588	2.71365	1.57235	0.209866	0.891832
Srsf2	0.107885	8.5814	1.57207	0.209907	0.891832
Rap1gap2	0.527063	2.34233	1.57176	0.209951	0.891832
1700067K01Rik	0.324535	0.769268	1.57041	0.210148	0.891832
Birc5	0.669494	4.23809	1.57023	0.210174	0.891832
Vpreb1	1.20001	-0.2985	1.56952	0.210277	0.891951
Siae	0.148899	4.31253	1.56698	0.210646	0.892539
Nlrc4	0.193919	4.65531	1.56555	0.210854	0.892539
Hnrnpul1	0.0804156	8.68294	1.56547	0.210865	0.892539
Sema3b	0.433301	0.160336	1.56407	0.211071	0.89309
Tmem109	0.142912	5.48591	1.55727	0.212065	0.895743
Uhrf1	0.268498	7.74208	1.55657	0.212169	0.895743
Steap4	1.16905	0.704653	1.55631	0.212206	0.895743
Ipmk	0.137663	5.2853	1.55618	0.212225	0.895743
Rab6a	0.095314	6.03988	1.55444	0.212481	0.89594
Gas8	0.227997	2.89843	1.55396	0.212552	0.89594
Lig4	0.189959	3.55677	1.55332	0.212645	0.89594
Kifc5b	0.268316	3.44815	1.55279	0.212724	0.89594
Setdb1	0.109122	6.54555	1.54978	0.213167	0.897029
Gtse1	0.397703	3.49871	1.54787	0.21345	0.897727
Cpsf2	0.107019	7.10158	1.54522	0.213842	0.89906
Ctdspl	0.864373	0.688811	1.54212	0.214303	0.899103
Taf4a	0.09615	6.30897	1.54074	0.214507	0.899103
Arhgef39	0.448457	0.943926	1.53908	0.214754	0.899103
Topors	0.140598	5.93226	1.53828	0.214874	0.899103
1700009P17Rik	0.44734	-0.452185	1.53763	0.21497	0.899103
Ngp	1.46347	2.38748	1.53538	0.215307	0.900125
Lzts1	0.78148	-0.742533	1.53158	0.215875	0.901431
Klhl23	0.899221	-0.468224	1.53026	0.216073	0.901722
Stag3	0.51292	1.8297	1.52979	0.216143	0.901722
Fzd7	0.721297	0.16282	1.52445	0.216948	0.90272
Cnot6l	0.144001	7.32321	1.5244	0.216955	0.90272
Pou2af1	0.103964	8.93164	1.52417	0.21699	0.90272
Rtn3	0.120874	7.38204	1.52215	0.217295	0.903278
Sec23a	0.163493	4.87249	1.52129	0.217425	0.903278
Sipa1l3	0.112117	5.37823	1.52006	0.217611	0.903278
Zbtb46	0.289732	2.95899	1.51764	0.217976	0.903664
Msi2	0.126898	6.9372	1.51632	0.218177	0.903867
Phactr2	0.381337	2.71384	1.51552	0.218299	0.903994
Tex2	0.254038	4.36001	1.51446	0.21846	0.903994
Fnbp1l	0.503439	1.37432	1.51439	0.21847	0.903994
Tpx2	0.625994	4.6265	1.51412	0.218512	0.903994
Oser1	0.131115	4.83175	1.51211	0.218817	0.90466
Wdr48	0.121834	6.19706	1.51107	0.218975	0.90466
Nup50	0.0904998	6.9153	1.51106	0.218977	0.90466
Mad2l1	0.229743	5.31417	1.50924	0.219255	0.904874
Dbt	0.141503	4.79212	1.50909	0.219277	0.904874
Casc3	0.0934161	7.228	1.50844	0.219378	0.904874
Slc39a5	0.443056	0.848383	1.50624	0.219713	0.904874
Necab3	0.29083	0.549459	1.50596	0.219757	0.904874
Prps2	0.113731	6.59644	1.50567	0.219801	0.904874
Thoc3	0.127369	5.48849	1.50416	0.220033	0.904874
Ube2c	0.844219	3.85171	1.50414	0.220036	0.904874
Ppfia1	0.112083	6.5382	1.50383	0.220083	0.904874
Trpv4	0.887102	0.136361	1.5036	0.220119	0.904874
Dcp2	0.167798	6.62526	1.50183	0.22039	0.904874
Ucp2	0.255717	10.1461	1.5009	0.220533	0.904874
Rusc1	0.264836	3.14994	1.50083	0.220543	0.904874
Sel1l3	0.652445	-0.788108	1.50067	0.220568	0.904874
Tfpi	0.380081	1.72239	1.50014	0.22065	0.904874
Rnf17	0.539036	-0.699787	1.4969	0.221149	0.904874
D630045J12Rik	0.351893	0.417602	1.49674	0.221173	0.904874
Inf2	0.187851	6.66571	1.49514	0.221421	0.904874
Fundc2	0.147142	5.69638	1.4942	0.221565	0.904979
Nup93	0.100347	6.38495	1.49297	0.221756	0.905136
Nf2	0.0977029	6.31396	1.49028	0.222173	0.906057
Nptn	0.0964433	6.68014	1.49004	0.22221	0.906057
Intu	0.245764	1.98134	1.48866	0.222424	0.906617
Casp9	0.145735	5.64541	1.48735	0.222628	0.907138
Canx	0.0965171	8.64663	1.48576	0.222876	0.907548
D930015E06Rik	0.0846416	8.38138	1.48572	0.222881	0.907548
Dpy19l4	0.180725	4.85958	1.48291	0.22332	0.907846
Celsr1	0.397063	1.60319	1.48149	0.223541	0.907846
Strn3	0.151727	5.20865	1.48143	0.223551	0.907846
Pbk	0.606485	3.16076	1.48139	0.223556	0.907846
Odf2l	0.155423	4.08325	1.48134	0.223565	0.907846
mt-Nd4	0.288184	9.82647	1.47956	0.223843	0.908479
Oaf	0.444574	0.670012	1.47875	0.22397	0.908479
Aifm1	0.129979	5.63978	1.47809	0.224073	0.908479
Fam219a	0.16329	3.68876	1.4779	0.224103	0.908479
Sfpq	0.111182	9.23435	1.47412	0.224697	0.909785
Nrxn2	0.625613	-0.284352	1.47346	0.2248	0.909785
St3gal4	0.24333	3.47114	1.47023	0.22531	0.909785
Hdac2	0.105302	6.30474	1.46957	0.225414	0.909785
Fbxl2	0.564997	-0.575685	1.46853	0.225578	0.909785
Dnah8	0.326755	3.68508	1.46822	0.225626	0.909785
Decr1	0.169527	4.43041	1.4668	0.225852	0.909785
Smyd2	0.368872	2.81303	1.4668	0.225852	0.909785
Galnt1	0.103991	7.24285	1.46631	0.225928	0.909785
Pmepa1	0.219469	4.0654	1.46287	0.226474	0.910443
Lrfn4	0.467646	0.423109	1.46207	0.226602	0.910443
1110034G24Rik	0.226972	2.57307	1.46153	0.226687	0.910443
Klf9	0.271414	2.90753	1.46142	0.226705	0.910443
Zfp60	0.147166	4.68694	1.45962	0.22699	0.910872
Zfc3h1	0.178622	7.17005	1.45626	0.227526	0.911282
Mblac2	0.245911	3.03483	1.4557	0.227616	0.911282
Wbp11	0.089309	7.41557	1.45441	0.227821	0.911282
Tiam1	0.562806	2.62984	1.4544	0.227823	0.911282
Ahi1	0.153922	3.90613	1.45419	0.227856	0.911282
Ecm1	0.277586	2.72208	1.45374	0.227928	0.911282
Smc6	0.126405	7.06726	1.4523	0.228159	0.911282
Npepps	0.101423	6.72453	1.45226	0.228165	0.911282
Srrm2	0.182295	10.3787	1.44916	0.228663	0.912078
Pogk	0.164477	5.16006	1.44613	0.22915	0.912507
A530064D06Rik	1.07389	-0.50638	1.44537	0.229272	0.912507
Hif1a	0.147654	6.78484	1.44462	0.229393	0.912507
Foxn2	0.165372	5.64949	1.44347	0.229578	0.912754
Gins3	0.187164	3.87528	1.44293	0.229665	0.912754
Cdc42bpg	0.19941	4.15788	1.44044	0.230068	0.912754
Anapc4	0.0980683	5.82884	1.43964	0.230197	0.912754
Kctd18	0.16251	4.97789	1.43883	0.230328	0.912754
Gm166	0.476853	-0.328394	1.43702	0.230622	0.912754
Dstn	0.266259	4.50515	1.43697	0.23063	0.912754
Ccna2	0.655941	5.12692	1.43678	0.230661	0.912754
Mctp1	0.709016	0.21127	1.43666	0.23068	0.912754
Zgrf1	0.197241	4.28542	1.43493	0.230962	0.912754
Prdm16	0.285615	1.71101	1.43431	0.231062	0.912754
Ctla2a	0.71019	0.579838	1.43423	0.231076	0.912754
Dnajc1	0.109131	5.1657	1.43412	0.231094	0.912754
Fbxo40	0.386777	-0.140102	1.43283	0.231304	0.912754
Nuak1	0.600809	2.53543	1.43248	0.231361	0.912754
Slco4a1	0.289969	5.29446	1.43099	0.231604	0.912754
Osbpl8	0.156648	7.2756	1.43083	0.231629	0.912754
Kif18b	0.65255	3.57306	1.42988	0.231784	0.912754
Sfmbt1	0.124647	5.46306	1.42961	0.231828	0.912754
Cpq	0.745662	-0.081488	1.42688	0.232275	0.912754
Nme4	0.263234	0.999859	1.4254	0.232517	0.912754
Mfhas1	0.164027	5.24311	1.42495	0.232591	0.912754
Zan	0.782369	0.518324	1.42449	0.232667	0.912754
Pigb	0.172756	3.83615	1.42242	0.233006	0.912754
Ocrl	0.191283	3.64157	1.4224	0.233008	0.912754
Plekhh1	0.286272	1.86535	1.42239	0.233011	0.912754
Elf1	0.119337	8.15806	1.41682	0.233927	0.912837
Nap1l3	0.449592	-0.331396	1.41528	0.234182	0.912842
Cdk8	0.117583	5.84915	1.4128	0.234592	0.912842
Cbfb	0.098031	7.47212	1.412	0.234724	0.912842
Ssbp2	0.217095	3.53685	1.41125	0.234849	0.912842
Zfp612	0.410962	0.72131	1.40896	0.235229	0.913055
Pdzd4	0.348941	2.12045	1.4087	0.235272	0.913055
Osgepl1	0.157672	3.93733	1.40353	0.236133	0.913055
Stard4	0.156838	6.35734	1.40295	0.23623	0.913055
Etv5	0.306558	3.20482	1.40179	0.236424	0.913055
Hacl1	0.357801	0.827704	1.40047	0.236645	0.913055
Acsl4	0.166528	5.82684	1.39994	0.236733	0.913055
Rpgrip1l	0.212649	3.29673	1.39946	0.236814	0.913055
Ewsr1	0.0886174	9.00614	1.39875	0.236933	0.913055
Atp10a	0.364516	3.08105	1.39826	0.237015	0.913055
Zfp109	0.382289	1.47214	1.39719	0.237194	0.913055
3110009E18Rik	0.282689	1.43895	1.39686	0.23725	0.913055
Mcph1	0.163112	3.84705	1.3963	0.237343	0.913055
Tespa1	0.187926	4.55667	1.39583	0.237422	0.913055
BC030336	0.130127	4.93024	1.39521	0.237527	0.913055
Slc43a1	0.418174	3.65184	1.39417	0.237703	0.913055
Nat6	0.184402	3.60061	1.39397	0.237735	0.913055
Ireb2	0.17281	6.88311	1.39386	0.237754	0.913055
Fbxo44	0.380486	1.67966	1.39286	0.237923	0.913055
Tacc3	0.284817	5.34993	1.39093	0.238248	0.913055
Plcb4	0.807739	-0.423368	1.39051	0.238319	0.913055
Dirc2	0.231923	3.67865	1.39042	0.238334	0.913055
Eif4e	0.111065	6.58231	1.38931	0.238522	0.913055
Ppp2r5e	0.106059	6.26899	1.38908	0.23856	0.913055
Nek7	0.112241	7.55075	1.38708	0.238898	0.913055
Cdc6	0.290728	4.83067	1.38695	0.23892	0.913055
Ints10	0.1248	5.28479	1.38639	0.239015	0.913055
Igsf9	0.19369	5.93764	1.38577	0.239121	0.913055
Agtrap	0.175697	4.60877	1.38439	0.239355	0.913055
Itm2c	0.295979	5.02066	1.38424	0.239381	0.913055
Lsm8	0.128382	5.29414	1.3837	0.239472	0.913055
Mfsd6	0.200805	4.30333	1.38015	0.240075	0.913138
Tst	0.239429	1.69309	1.37997	0.240106	0.913138
Ccne1	0.240278	4.97199	1.37987	0.240123	0.913138
Slc24a5	0.336001	0.565376	1.37974	0.240146	0.913138
Sec63	0.100071	6.57186	1.379	0.240272	0.913324
Ston1	0.433168	-0.598776	1.37851	0.240355	0.913348
Melk	0.462897	3.62573	1.378	0.240442	0.913388
Spire1	0.226233	1.98774	1.37719	0.240581	0.913624
Fam129a	0.36285	5.22138	1.37362	0.241191	0.914081
Creb1	0.154039	7.13386	1.37337	0.241234	0.914081
Klhl9	0.143734	5.5199	1.3721	0.241451	0.914081
Fnip1	0.178956	5.86661	1.3715	0.241554	0.914081
2700049A03Rik	0.142869	4.53106	1.3702	0.241778	0.914081
Gzf1	0.139853	4.51021	1.37004	0.241805	0.914081
Mapk8	0.126799	4.88798	1.36931	0.241931	0.914081
Psmd1	0.105681	7.1178	1.36588	0.242522	0.91486
Ubr5	0.154945	7.6955	1.36474	0.242718	0.915171
Tonsl	0.175444	5.73006	1.36451	0.242758	0.915171
Tefm	0.165161	2.96286	1.36037	0.243474	0.916233
Fdps	0.268942	2.32661	1.35994	0.243547	0.916233
Elf4	0.119666	7.4069	1.35965	0.243597	0.916233
Cxx1b	0.293888	1.53162	1.35919	0.243678	0.916233
Ralgapa1	0.169088	6.68779	1.35888	0.243731	0.916233
9430020K01Rik	0.395665	1.57034	1.35727	0.244012	0.916352
Wnt2b	0.617126	-0.630169	1.35699	0.24406	0.916352
2700089E24Rik	0.128005	4.57409	1.35581	0.244266	0.916352
Ssr1	0.0804125	7.46352	1.35558	0.244305	0.916352
B630005N14Rik	0.154587	6.52997	1.35435	0.244518	0.916511
Cdk2ap1	0.191308	5.98026	1.35219	0.244895	0.916898
Smtnl2	1.4735	0.218243	1.35165	0.24499	0.916898
Efr3b	0.527661	-0.686155	1.3502	0.245244	0.916898
Plekhg5	0.390356	2.21362	1.34897	0.245458	0.91692
Mfsd8	0.194485	3.8578	1.34801	0.245626	0.916981
Tnfrsf8	0.262282	1.01763	1.34764	0.245692	0.916981
Gpcpd1	0.12056	8.16525	1.34733	0.245746	0.916981
Pnpla8	0.106572	5.83059	1.34556	0.246055	0.916981
Pkn2	0.122845	6.08008	1.34509	0.246138	0.916981
Zscan29	0.138806	5.86496	1.34492	0.246168	0.916981
Btbd10	0.165777	4.21565	1.34247	0.246598	0.917212
Snapc1	0.145792	4.8055	1.34194	0.246692	0.917212
Col7a1	0.339483	1.80246	1.34194	0.246692	0.917212
Chrna2	0.49388	0.490063	1.34029	0.246983	0.917282
Yeats2	0.137493	5.53628	1.34023	0.246994	0.917282
Ankrd6	0.681249	-0.823342	1.33819	0.247353	0.917282
Pdss2	0.169921	3.04462	1.33736	0.247499	0.917282
Ccnyl1	0.170832	3.35547	1.33699	0.247565	0.917282
Ikbke	0.196971	5.15196	1.33615	0.247715	0.917282
Hnf1b	0.504217	1.73109	1.33596	0.247747	0.917282
Tubd1	0.195762	2.83661	1.33528	0.247868	0.917282
Fkbp5	0.118787	5.50492	1.33422	0.248056	0.917319
Slc16a10	0.345471	3.84626	1.33305	0.248264	0.917319
Capsl	0.617657	-0.203526	1.33285	0.248298	0.917319
Hist1h4c	0.521798	0.0528647	1.32702	0.249336	0.9181
Apobec2	0.367843	1.6164	1.32574	0.249565	0.9181
Glrx	0.216375	3.23782	1.32545	0.249616	0.9181
Plk1	0.621441	3.7496	1.3245	0.249785	0.9181
Psme3	0.0921963	8.09712	1.32424	0.249833	0.9181
Apba1	0.493665	1.62577	1.32347	0.249971	0.9181
Egfl7	0.518025	-0.587979	1.31968	0.25065	0.9181
Uchl1	0.760534	2.03185	1.3195	0.250681	0.9181
Zfp422	0.101835	5.6155	1.31897	0.250776	0.9181
Zfp715	0.159352	5.66438	1.31871	0.250824	0.9181
Amot	0.340394	0.520489	1.31791	0.250967	0.9181
Slc22a4	1.08821	-0.640789	1.3174	0.25106	0.9181
Arhgap33	0.367319	4.22686	1.31668	0.251188	0.9181
Mtfr1	0.129725	4.82445	1.31626	0.251264	0.9181
Mphosph9	0.146019	5.46789	1.31613	0.251288	0.9181
Clip2	0.17167	4.59359	1.31596	0.251317	0.9181
Csrp2	0.267235	4.79073	1.31559	0.251384	0.9181
Igfbp7	0.704012	-0.468311	1.31388	0.251693	0.9181
Stambp	0.138137	4.04063	1.31135	0.252151	0.9181
4930426L09Rik	0.519213	-0.145748	1.31047	0.25231	0.9181
Ccl2	1.31514	-0.968352	1.31025	0.252349	0.9181
Tlk1	0.119187	7.30577	1.31013	0.25237	0.9181
Fsip1	0.404037	0.00115528	1.30993	0.252408	0.9181
Socs6	0.147717	4.49161	1.3089	0.252594	0.9181
Atn1	0.238543	3.02838	1.30723	0.252897	0.9181
Scoc	0.159265	3.66693	1.30713	0.252915	0.9181
AI987944	0.130945	4.76189	1.30459	0.253376	0.9181
Ska3	0.426874	2.91152	1.30455	0.253383	0.9181
Extl3	0.0939245	6.84754	1.30296	0.253673	0.9181
Evi5	0.220487	3.88077	1.30159	0.253924	0.9181
Atp8b4	0.522495	2.5988	1.30075	0.254076	0.9181
Zfp40	0.198315	3.03376	1.30034	0.254152	0.9181
Hspa1a	0.727976	-0.794401	1.29917	0.254365	0.9181
Patl1	0.106001	6.27783	1.29876	0.254439	0.9181
Myh10	0.358424	1.09613	1.29834	0.254516	0.9181
Mthfd2l	0.293652	1.18995	1.29781	0.254613	0.9181
Vps35	0.0927449	6.95565	1.29553	0.255032	0.918641
Kif22	0.417936	4.62261	1.29264	0.255563	0.919156
Nfyb	0.110927	5.59666	1.29065	0.255928	0.919156
Tmed5	0.116535	6.8342	1.29013	0.256025	0.919156
Dlg4	0.268734	1.99509	1.29012	0.256025	0.919156
Tmem229b	0.148946	7.25188	1.28798	0.256421	0.919284
Chil3	1.31397	1.73523	1.28718	0.256568	0.919284
4930402H24Rik	0.152481	4.0823	1.28546	0.256887	0.919284
Ccnt2	0.138689	7.20725	1.28445	0.257073	0.919284
Cbl	0.158693	7.91669	1.28296	0.25735	0.919284
Rnaset2b	0.378777	1.10515	1.28261	0.257414	0.919284
Ccdc102a	0.478571	0.0988042	1.28241	0.257451	0.919284
Kif16b	0.155259	5.15134	1.28173	0.257577	0.919284
Errfi1	0.27502	1.75835	1.28168	0.257587	0.919284
Dynlt1a	0.297325	2.12515	1.28155	0.25761	0.919284
Mxi1	0.232492	4.3029	1.28116	0.257684	0.919284
Rgs16	0.382325	2.10403	1.27848	0.258183	0.920235
Gstt3	0.335302	2.00307	1.27628	0.258592	0.92059
Prkag2	0.118104	4.66278	1.27506	0.25882	0.920691
Tceal8	0.488822	0.957146	1.27505	0.258821	0.920691
Mapk8ip1	0.484206	-0.593249	1.27488	0.258852	0.920691
Dhtkd1	0.449294	0.667254	1.27388	0.259041	0.92072
Slc16a13	0.158724	3.20969	1.27301	0.259202	0.920801
Pde5a	0.555157	1.39746	1.27234	0.259328	0.920801
4833420G17Rik	0.112263	6.76797	1.27178	0.259433	0.920825
Zranb1	0.0933347	5.87457	1.27045	0.259683	0.920825
Uchl5	0.139112	5.28676	1.26972	0.259819	0.920825
Tnip2	0.119888	5.95777	1.26803	0.260136	0.921001
Elovl5	0.0907587	6.37754	1.26762	0.260213	0.921001
Hspd1	0.121578	8.76145	1.2674	0.260256	0.921001
Frg1	0.160574	5.98936	1.26501	0.260705	0.921492
Eaf1	0.102484	6.09728	1.26439	0.260821	0.92163
Ccser2	0.167977	6.11798	1.26321	0.261045	0.921915
Cdnf	0.440064	-0.288857	1.26205	0.261264	0.921915
Cep70	0.167491	3.47999	1.25961	0.261724	0.921915
Tvp23a	0.294894	1.6248	1.25854	0.261928	0.921915
Celf1	0.159182	8.01647	1.25845	0.261944	0.921915
Tifa	0.334217	5.43692	1.25836	0.261961	0.921915
Ankle1	0.736677	3.37823	1.25706	0.262209	0.921915
Zfand6	0.0938181	6.5059	1.25596	0.262417	0.921915
Fam120a	0.128866	8.12085	1.25385	0.262819	0.921915
Cetn3	0.133345	5.63646	1.25363	0.262859	0.921915
Slc9b2	0.414754	0.476279	1.25294	0.262991	0.921915
Spata24	0.167753	3.63926	1.25293	0.262994	0.921915
Hmgn3	0.230151	4.7208	1.25177	0.263215	0.921915
Rps6ka5	0.137008	5.05999	1.2517	0.263228	0.921915
Pcbp3	0.162557	3.32205	1.25006	0.263542	0.921915
Itgam	0.786631	1.77939	1.24961	0.263626	0.921915
Paics	0.0975651	7.65825	1.24901	0.263741	0.921915
Zwint	0.0992027	6.1336	1.24846	0.263847	0.921915
Camkmt	0.262543	1.76611	1.24769	0.263994	0.921937
Msl3	0.108549	5.81808	1.24612	0.264295	0.921937
Naa35	0.0978868	5.68993	1.2446	0.264587	0.921937
Nrp2	0.355648	3.06153	1.24415	0.264672	0.921937
Atl2	0.100011	5.70585	1.24389	0.264723	0.921937
Thnsl1	0.208603	2.34985	1.24387	0.264726	0.921937
Oxa1l	0.150469	6.9762	1.24261	0.26497	0.921937
Clu	0.550903	-0.149644	1.24224	0.26504	0.921937
Camk2d	0.105449	7.36126	1.24143	0.265196	0.921937
Fus	0.0884699	9.33163	1.24125	0.26523	0.921937
Oxr1	0.125665	5.65636	1.24109	0.265261	0.921937
P2rx3	0.504632	-0.00532537	1.23936	0.265594	0.921937
Fbxw10	0.230909	2.42205	1.23736	0.265981	0.921937
Ric1	0.156913	5.76936	1.23637	0.266172	0.921937
Mre11a	0.0901018	5.83359	1.23626	0.266193	0.921937
Mis18a	0.134626	4.89974	1.23519	0.2664	0.921937
Camkk1	0.24776	2.21482	1.23162	0.267092	0.921937
Ide	0.204939	6.79004	1.23139	0.267137	0.921937
Mospd1	0.17269	3.4525	1.23096	0.26722	0.921937
Gfi1b	0.917777	-0.0619309	1.23071	0.267268	0.921937
BC030499	0.372268	0.066931	1.23034	0.267342	0.921937
Akap12	0.26739	5.90996	1.22933	0.267537	0.921979
Ppp1r32	0.369669	0.268554	1.22686	0.268018	0.921979
S100a9	1.21936	2.27561	1.22661	0.268068	0.921979
Ero1l	0.188966	5.639	1.22641	0.268107	0.921979
Gm20939	0.235319	1.88856	1.22629	0.268129	0.921979
Wipf1	0.0867023	8.21025	1.22542	0.268299	0.921985
Gatm	0.636212	0.284097	1.22432	0.268514	0.921985
Sapcd2	0.623219	2.35631	1.2235	0.268675	0.921985
Whrn	0.125411	5.94758	1.22233	0.268903	0.921985
Fgfr1op2	0.083733	7.37277	1.22125	0.269116	0.921985
AI429214	0.41736	0.197842	1.22004	0.269352	0.921985
Dpcd	0.155756	3.63666	1.2196	0.26944	0.921985
Etaa1	0.151173	4.88183	1.21947	0.269464	0.921985
2310057M21Rik	0.146105	4.11727	1.21931	0.269497	0.921985
Itga2b	0.678061	2.51212	1.21865	0.269625	0.921985
Frrs1	0.243468	3.60469	1.21838	0.26968	0.921985
Aatk	0.894487	-0.128718	1.21735	0.269882	0.921985
Fam64a	0.699128	1.69265	1.21607	0.270134	0.921985
Ccdc50	0.149168	9.0251	1.21493	0.270358	0.921985
Sart3	0.0838492	7.24179	1.21423	0.270497	0.921985
Bcor	0.111163	7.2473	1.21306	0.270728	0.921985
Mdm1	0.192497	3.88313	1.21244	0.27085	0.921985
Nt5c2	0.0870468	6.02437	1.21244	0.27085	0.921985
Knop1	0.117512	5.7692	1.21197	0.270942	0.921985
Gtf2i	0.0978532	7.02053	1.21075	0.271183	0.921985
Plcl1	0.372605	0.91987	1.21041	0.271251	0.921985
F12	1.29166	-1.01853	1.20929	0.271474	0.921985
9430015G10Rik	0.121975	5.93016	1.20847	0.271635	0.921985
Rbm27	0.149174	6.4523	1.20841	0.271647	0.921985
Prkrip1	0.127051	4.53165	1.20807	0.271714	0.921985
F930017D23Rik	0.400656	1.34003	1.20735	0.271858	0.921985
Rhbdl1	0.339979	0.983162	1.20562	0.272201	0.921985
Pmaip1	0.140387	4.9653	1.20416	0.272492	0.921985
Zcchc17	0.160602	5.45294	1.20383	0.272557	0.921985
Cdc42bpb	0.22066	3.32286	1.20372	0.272579	0.921985
Mtus1	1.10736	0.300624	1.20371	0.272581	0.921985
Rhot2	0.129404	5.46376	1.20367	0.272589	0.921985
Nrxn1	0.58365	-0.629469	1.20341	0.272641	0.921985
Larp1b	0.131054	4.16007	1.20221	0.27288	0.921985
1190002N15Rik	0.188716	3.65692	1.20212	0.272899	0.921985
Terf1	0.150947	4.33924	1.19967	0.273388	0.921985
B3gntl1	0.130756	3.82511	1.19948	0.273426	0.921985
Gm14399	0.420154	-0.374004	1.19873	0.273575	0.921985
Cyb5d2	0.197403	2.42814	1.19869	0.273584	0.921985
Id1	0.615921	-0.519814	1.19712	0.273897	0.922349
Kpnb1	0.0888873	8.74344	1.1959	0.274143	0.922915
Prrc2c	0.192007	8.6081	1.19505	0.274314	0.923228
A930033H14Rik	0.39843	0.0551288	1.19404	0.274516	0.923385
Rnf8	0.194836	2.91852	1.19235	0.274857	0.92344
Zranb2	0.133188	6.8761	1.19215	0.274897	0.92344
Nvl	0.0985923	6.58676	1.19164	0.274999	0.92344
Ccr2	0.820945	2.79262	1.19105	0.275119	0.92344
Adcy6	0.430713	3.73684	1.19103	0.275122	0.92344
Ralgps1	0.13723	4.24756	1.18989	0.275351	0.92344
Jade1	0.151915	5.66163	1.18972	0.275386	0.92344
Csf1	0.3735	5.01306	1.18719	0.275898	0.923854
Hp1bp3	0.0870175	7.73714	1.18651	0.276034	0.923943
Tmem154	0.100311	6.41939	1.18629	0.27608	0.923943
Mterf1b	0.231282	2.0129	1.1848	0.276382	0.924599
Kif13b	0.149868	5.45921	1.18428	0.276486	0.924599
Sec61g	0.15454	5.67291	1.18356	0.276633	0.924599
Setd1a	0.114752	5.93488	1.18319	0.276708	0.924599
Mgat5	0.136976	5.37089	1.18273	0.276801	0.924599
Mdfic	0.143907	5.30824	1.18023	0.277308	0.925358
Terf2	0.0960088	6.17109	1.17942	0.277474	0.925358
Rgcc	0.550148	0.427346	1.17813	0.277737	0.925844
Tenm4	0.299381	1.23843	1.17316	0.278753	0.927212
Fam89a	0.307275	0.787265	1.17309	0.278767	0.927212
Ap4b1	0.229173	2.09067	1.17231	0.278927	0.927212
Otud1	0.122123	5.89904	1.17085	0.279227	0.927595
Sec62	0.0835488	6.65996	1.17061	0.279277	0.927595
Bmp6	0.351393	0.0404152	1.16899	0.279609	0.927662
Ppl	0.34302	0.922296	1.16736	0.279945	0.928287
Stxbp5	0.12264	5.31939	1.16732	0.279953	0.928287
Rab44	1.01183	2.53054	1.16589	0.280248	0.928745
Atp5k	0.209227	4.90293	1.16501	0.280428	0.929013
Tagap1	0.120801	4.91099	1.16474	0.280485	0.929013
Cdk17	0.106652	6.87422	1.16426	0.280583	0.929079
Acot11	0.234446	2.57219	1.16374	0.280691	0.929178
Dlst	0.0786773	7.20855	1.16265	0.280916	0.929524
Cdca5	0.380317	4.26319	1.15986	0.281494	0.930236
Tchp	0.154043	5.11303	1.15868	0.28174	0.930236
A130010J15Rik	0.135557	4.45053	1.15773	0.281938	0.930236
Ctsw	0.373937	1.55513	1.15734	0.282017	0.930236
Dnal1	0.33501	0.975234	1.15513	0.282478	0.930236
Pidd1	0.196511	5.13718	1.15444	0.282621	0.930236
P2ry13	0.744021	0.209507	1.15407	0.282698	0.930236
Fam53b	0.185081	7.43499	1.15364	0.282789	0.930236
Kif5b	0.164902	7.20827	1.15139	0.283259	0.930236
Pdzd8	0.116169	6.37255	1.15097	0.283346	0.930236
Tmem8b	0.192481	3.15783	1.15089	0.283364	0.930236
Mkln1	0.083544	6.11659	1.15077	0.283387	0.930236
Rock2	0.14541	6.96446	1.14999	0.283551	0.930236
Eps8	0.285345	3.34101	1.14979	0.283593	0.930236
Apaf1	0.180909	5.63903	1.1486	0.283842	0.930236
Dgkh	0.225718	4.70833	1.14852	0.283859	0.930236
Gmnn	0.207007	4.84491	1.14766	0.28404	0.930236
Evi2a	0.15064	5.78242	1.14592	0.284405	0.930236
Zmiz1	0.172182	6.40328	1.14551	0.28449	0.930236
Sag	0.365493	0.984158	1.14541	0.284511	0.930236
Pcna	0.148262	8.49788	1.1436	0.284893	0.930236
Aph1b	0.360329	1.06903	1.14308	0.285001	0.930236
Paqr7	0.282043	1.82493	1.14297	0.285026	0.930236
Tstd3	0.171234	3.31968	1.14283	0.285056	0.930236
Srl	0.29684	1.38124	1.14275	0.285071	0.930236
Ccnf	0.358785	4.48757	1.14216	0.285196	0.930236
Dnajb6	0.0841476	6.71391	1.142	0.28523	0.930236
Dock7	0.552542	1.71402	1.14088	0.285466	0.930236
Lca5	0.178098	2.75561	1.13918	0.285825	0.930236
Stag1	0.0928949	6.63409	1.13712	0.286261	0.930236
Elmo1	0.086993	6.63296	1.13655	0.286382	0.930236
Mtmr12	0.0916215	5.97407	1.13509	0.286691	0.930236
Ankrd26	0.178	4.53943	1.13394	0.286937	0.930236
Extl1	0.289187	2.44379	1.13354	0.287022	0.930236
Gpr68	0.41656	1.5086	1.13327	0.287079	0.930236
Tpm4	0.134603	7.9232	1.13075	0.287614	0.930236
Rhd	0.76965	0.106514	1.13043	0.287684	0.930236
Pcyt1a	0.147983	5.11342	1.12988	0.287801	0.930236
Trpm4	0.184671	3.26483	1.12906	0.287977	0.930236
Dclre1a	0.186242	2.64115	1.12706	0.288402	0.930236
Fgf11	0.527185	0.242866	1.12704	0.288407	0.930236
Zak	0.168674	3.36092	1.12692	0.288433	0.930236
6530409C15Rik	0.357629	0.688018	1.12658	0.288505	0.930236
Capn2	0.133222	4.62871	1.12591	0.288649	0.930236
Msantd2	0.141979	4.67072	1.12513	0.288816	0.930236
1110032A03Rik	0.163164	3.15224	1.1251	0.288824	0.930236
Ttc7b	0.135581	4.18691	1.12411	0.289034	0.930236
Atp13a3	0.167638	7.07149	1.12387	0.289086	0.930236
Cst7	0.439365	1.06463	1.12243	0.289395	0.930236
Il17rd	0.464262	0.0655705	1.12199	0.289491	0.930236
Tfb1m	0.182694	3.34628	1.12093	0.289717	0.930236
Opn3	0.213713	3.29959	1.12019	0.289877	0.930236
Zeb2	0.277318	5.4481	1.12007	0.289902	0.930236
Neto2	0.199691	2.19151	1.12004	0.289909	0.930236
Ubtd2	0.233733	2.35185	1.11969	0.289986	0.930236
Ikzf1	0.100853	9.33846	1.11964	0.289996	0.930236
Slc25a46	0.0951001	5.8475	1.11774	0.290405	0.930236
Cdkn2aip	0.122454	4.96352	1.11733	0.290495	0.930236
Pyroxd1	0.145937	3.67457	1.11681	0.290606	0.930236
B430306N03Rik	0.305573	2.84951	1.11654	0.290665	0.930236
Nudt7	0.183659	3.16188	1.11634	0.290709	0.930236
Cp	0.424268	-0.109119	1.1148	0.291041	0.930858
BC017158	0.106668	4.72472	1.11167	0.29172	0.931075
Slc12a2	0.199458	4.40545	1.1114	0.291779	0.931075
Ppp2ca	0.0927111	7.58599	1.11056	0.29196	0.931075
Acbd3	0.115699	6.2438	1.11025	0.292029	0.931075
Spon1	0.383364	0.0962507	1.11	0.292083	0.931075
2210018M11Rik	0.114681	6.13886	1.10971	0.292145	0.931075
Mut	0.117964	4.66091	1.10888	0.292326	0.931403
Rrm2b	0.122265	5.29505	1.10839	0.292432	0.931492
[truncated: 4,126 more rows]

## Sheet: WT_Both_vs_KO_Both_up_q05genes
Orai1
Orai3
Wnt1
Drp2
Cd79a
Otx1
Ncoa7
Inpp4a
Auts2
Wnt10b
Gpr176
Egfl6
Rgs9bp
Pla2g4c
Ncapd3
Ppm1e

## Sheet: WT_Both_vs_KO_Both_lo
gene	logFC	logCPM	LR	PValue	FDR
Icosl	-0.921213	7.33199	40.3582	2.11412e-10	6.28635e-07
Neurl3	-0.761176	7.81042	31.6074	1.88708e-08	4.48899e-05
Pik3ip1	-0.680423	5.53461	26.5726	2.53815e-07	0.000369874
Grap2	-0.59605	7.76919	23.2407	1.42942e-06	0.00170016
H2-DMb2	-0.512326	8.82884	22.2858	2.34938e-06	0.00254032
Plaur	-0.603651	5.80844	21.7215	3.15246e-06	0.00288426
Cnr2	-0.452834	6.97029	21.7514	3.10367e-06	0.00288426
Btnl2	-0.798298	4.04207	19.8099	8.55364e-06	0.00635856
H2-Ob	-0.446937	9.86611	19.4637	1.02527e-05	0.00677477
Bcl6	-0.538835	6.31322	18.8699	1.39942e-05	0.00832232
S1pr1	-0.532899	7.87233	18.7416	1.49684e-05	0.00847782
Fibcd1	-0.934769	4.22219	18.2862	1.90079e-05	0.0102764
Tsc22d3	-0.47172	6.5208	16.9075	3.92463e-05	0.0194498
Egr4	-2.28985	-1.25171	16.7693	4.22097e-05	0.0200817
Scimp	-0.839465	3.21521	15.7387	7.27198e-05	0.0320344
Ltb	-0.642745	7.53518	15.4711	8.37783e-05	0.0332153
Cd22	-0.375406	9.92249	15.4921	8.28494e-05	0.0332153
Aqp3	-1.85831	0.88988	15.5948	7.84695e-05	0.0332153
Cacna1i	-0.898871	6.70861	15.3669	8.85244e-05	0.0339648
Dcst1	-1.1871	0.1977	15.228	9.52795e-05	0.0343411
H2-Eb1	-0.526877	10.7724	15.2725	9.3063e-05	0.0343411
S1pr4	-0.518501	7.27445	14.8615	0.000115699	0.038255
H2-Aa	-0.488225	11.1854	14.611	0.000132143	0.0408778
2021-03-01	-0.621002	7.08609	13.9762	0.000185136	0.0550502
H2-Ab1	-0.529838	10.9803	13.634	0.000222128	0.0629045
Susd3	-0.515123	5.41035	13.3307	0.000261094	0.06901
Fcrl1	-0.340481	8.11833	13.1126	0.000293319	0.0711986
Cd74	-0.397154	12.9271	13.1304	0.00029055	0.0711986
Gbp3	-0.442871	5.25842	12.9198	0.000325116	0.0773386
Itgb7	-0.488084	6.89171	12.7648	0.000353208	0.0777973
Tmem100	-2.47121	-1.0263	12.1989	0.000478186	0.0997815
Hs3st1	-0.604927	4.81716	11.984	0.000536588	0.10637
Adrb2	-0.421422	5.22522	11.9071	0.000559203	0.109035
Slc41a3	-0.899209	2.01952	11.7039	0.000623699	0.112823
Xkrx	-0.614988	5.59433	11.7316	0.000614467	0.112823
Fcer2a	-0.516589	9.21713	11.484	0.000701962	0.121002
H2-DMa	-0.496925	7.49046	11.3275	0.000763662	0.123966
Il4ra	-0.31258	8.05923	11.3612	0.000749943	0.123966
Rasal3	-0.254658	8.43592	11.2818	0.000782695	0.124125
Impg2	-1.01482	1.6533	10.974	0.000923992	0.128059
Pink1	-0.514671	6.16802	11.0088	0.000906817	0.128059
Ms4a4c	-0.404172	8.06822	11.0254	0.000898729	0.128059
Galnt6	-0.591365	4.87672	11.0638	0.000880276	0.128059
Gipc3	-0.603115	3.00222	10.8332	0.000996953	0.130305
Tmem86a	-0.614176	3.78123	10.856	0.000984784	0.130305
Trp53i11	-0.333653	7.26629	10.8607	0.00098226	0.130305
Socs3	-0.642408	3.92217	10.8124	0.00100822	0.130346
Sh3tc1	-0.364713	5.3523	10.6838	0.00108077	0.138222
Lmo2	-0.380189	6.94133	10.4748	0.00121012	0.148384
Sepw1	-0.483999	6.70043	10.4931	0.0011982	0.148384
Hmha1	-0.365971	10.3335	10.3593	0.00128826	0.150221
Mafk	-0.325583	6.47736	10.3705	0.00128044	0.150221
Ciita	-0.426523	8.57241	10.3789	0.00127466	0.150221
Fgd3	-0.267813	7.20029	10.422	0.00124524	0.150221
Ier5	-0.331296	7.79357	10.202	0.0014029	0.162
Arhgef18	-0.436518	8.19577	10.1491	0.00144373	0.16354
Gad1	-0.852569	3.07926	10.1197	0.00146692	0.164599
Mrgpre	-0.375418	4.71	10.0518	0.00152198	0.167615
Spaca1	-1.25389	0.299279	9.92951	0.0016265	0.175869
Tle2	-0.721314	2.05108	9.91199	0.00164205	0.175951
Ttbk1	-1.01846	3.76176	9.89384	0.00165833	0.176109
B3gnt7	-0.567832	5.40669	9.8483	0.00169989	0.178924
Msrb3	-1.01667	1.75984	9.78979	0.00175483	0.181495
Mcmdc2	-1.94182	-0.747055	9.7678	0.00177594	0.182096
Cd40	-0.26421	6.10185	9.59719	0.00194875	0.196428
Arap1	-0.234518	8.05362	9.52716	0.00202453	0.201597
Ppp1r35	-0.382698	4.87912	9.42803	0.00213693	0.204973
Tlr1	-0.355834	7.24114	9.28803	0.00230656	0.212669
H2-Oa	-0.504558	6.48064	9.30094	0.00229036	0.212669
Smagp	-0.533798	3.73334	9.20793	0.0024097	0.220469
Prss12	-1.63623	2.12279	9.08728	0.00257394	0.231927
Rplp2	-0.30184	10.0708	8.99348	0.00270944	0.233915
S1pr3	-0.556252	3.58007	8.994	0.00270867	0.233915
Spns2	-0.660825	5.17392	9.01733	0.00267432	0.233915
Nacad	-0.594683	3.99538	8.7226	0.00314289	0.253305
Gns	-0.237334	8.21683	8.72359	0.00314119	0.253305
Fam43a	-0.267256	7.62586	8.73723	0.00311778	0.253305
H2-Eb2	-0.370572	6.94092	8.67801	0.00322072	0.257095
Traf2	-0.221068	5.96655	8.55629	0.0034433	0.265939
Maf1	-0.267822	7.42213	8.53031	0.0034928	0.268022
Ufsp1	-0.791901	1.0134	8.46873	0.00361304	0.27258
Rapgef4	-0.593531	5.09833	8.4283	0.00369425	0.274621
Trim7	-0.507679	6.12552	8.32416	0.00391212	0.280306
6430571L13Rik	-0.904088	0.0152365	8.33508	0.00388867	0.280306
Asic1	-0.487268	2.69341	8.24095	0.00409557	0.289956
Rgs2	-0.544047	6.93055	8.169	0.00426123	0.296392
H2-DMb1	-0.3666	6.87056	8.14322	0.00432224	0.296475
Sell	-0.474483	9.39954	8.0408	0.00457355	0.30221
Shisa5	-0.383615	10.4729	8.04899	0.00455291	0.30221
Lmbrd1	-0.253883	7.15718	8.05157	0.00454642	0.30221
Sh2b3	-0.205263	8.11565	8.06917	0.00450248	0.30221
Dapp1	-0.243433	5.89751	8.07975	0.00447626	0.30221
Prom1	-2.72018	-0.87321	7.86088	0.00505157	0.304992
Pgap3	-0.348087	3.79427	7.86929	0.00502815	0.304992
Bcl9l	-0.308167	6.84484	7.88884	0.00497408	0.304992
Kifc2	-0.457617	3.62107	7.90478	0.00493042	0.304992
Mapk11	-0.462498	6.03555	7.9155	0.00490132	0.304992
Mppe1	-0.309165	5.16546	7.94542	0.00482093	0.304992
Rpl23a	-0.294982	9.40431	7.95716	0.00478976	0.304992
Rps16	-0.308375	10.3301	8.00227	0.00467188	0.304992
Klc4	-0.311774	5.04336	7.82512	0.00515251	0.307246
Ip6k1	-0.233507	8.02424	7.75776	0.00534821	0.311822
Eme2	-0.312036	4.28721	7.76421	0.00532915	0.311822
Cxcr5	-0.374503	8.16748	7.72935	0.00543304	0.313692
Lamp3	-1.10624	1.75461	7.68692	0.00556224	0.318064
Lace1	-0.40884	3.30322	7.6192	0.00577501	0.324
Zkscan14	-0.398948	4.06436	7.63227	0.00573331	0.324
Mical1	-0.296537	7.31461	7.53085	0.00606513	0.337096
Mgrn1	-0.224367	7.60884	7.48412	0.00622456	0.342754
Gadd45g	-0.567741	4.37528	7.46551	0.00628924	0.343138
Pnkp	-0.281389	6.2989	7.46725	0.00628315	0.343138
Grasp	-0.377302	4.20855	7.43601	0.00639313	0.344072
Zfp457	-1.12031	-0.243549	7.43697	0.00638975	0.344072
Lgals8	-0.259642	6.4448	7.43827	0.00638512	0.344072
Cyth1	-0.267402	8.07502	7.40437	0.00650656	0.345487
Blk	-0.232202	8.89743	7.34032	0.00674249	0.353282
Rps12	-0.272225	10.5358	7.24401	0.0071138	0.358804
Ctsh	-0.261125	8.39028	7.2531	0.00707789	0.358804
Rgs14	-0.297245	5.94068	7.26402	0.00703498	0.358804
Lpxn	-0.271514	6.58704	7.27248	0.00700189	0.358804
Slc14a1	-0.360218	4.70884	7.21008	0.00724953	0.363822
St6gal1	-0.251827	8.09278	7.16599	0.00742985	0.371305
Gm8730	-0.250339	9.93431	7.06885	0.00784357	0.380781
Irf5	-0.210159	8.31218	7.07316	0.00782472	0.380781
Arhgef1	-0.270827	10.2002	7.0571	0.00789519	0.381729
Rps4l	-0.608193	2.22342	7.04004	0.00797073	0.383821
Kmo	-0.227544	7.65775	7.02599	0.00803351	0.385248
Stac2	-0.430509	4.81066	7.00291	0.00813772	0.38716
Bcl3	-0.314587	6.1038	6.97497	0.00826578	0.388451
Cd53	-0.184184	8.74731	6.92204	0.00851398	0.390986
Sbk1	-0.297636	8.66667	6.92351	0.00850698	0.390986
Syk	-0.222291	9.59723	6.92995	0.00847641	0.390986
Gsap	-0.450789	4.76028	6.91221	0.00856092	0.391629
Lemd2	-0.235971	6.18222	6.90444	0.00859819	0.391827
Snx8	-0.226908	6.83886	6.86234	0.00880313	0.392348
Rpl27-ps3	-0.72788	0.933888	6.87256	0.00875293	0.392348
Pxdc1	-0.364707	6.08156	6.87749	0.0087288	0.392348
Orm3	-1.05646	0.677249	6.89466	0.00864536	0.392348
Tmem81	-0.381904	3.62128	6.8221	0.00900368	0.396629
Slc25a18	-0.976358	0.146563	6.82347	0.00899677	0.396629
Cerk	-0.264949	8.46173	6.75499	0.0093486	0.405994
Fcgrt	-0.872074	4.16567	6.72404	0.00951221	0.408458
Lat2	-0.237471	6.88597	6.71685	0.00955062	0.408615
Gm1840	-0.840784	-0.539501	6.67338	0.00978633	0.410505
1500011B03Rik	-0.356847	4.09824	6.68323	0.00973243	0.410505
Ryr2	-1.59631	1.22863	6.65748	0.00987404	0.410636
Sult1a1	-1.65885	-0.816321	6.66313	0.00984277	0.410636
Rps6	-0.246371	10.2774	6.60348	0.0101779	0.417436
Smad3	-0.376306	5.9878	6.53839	0.0105571	0.419031
Rps9	-0.263929	10.6985	6.55099	0.0104826	0.419031
Plcd3	-1.25979	2.27497	6.55119	0.0104814	0.419031
Gm10110	-0.528985	1.82652	6.55371	0.0104666	0.419031
Tk2	-0.250955	6.22918	6.56239	0.0104157	0.419031
Sun2	-0.174585	8.15172	6.51758	0.0106813	0.419286
B4galnt1	-0.272664	8.10765	6.51943	0.0106702	0.419286
Syt11	-0.3262	4.3694	6.40352	0.0113894	0.427534
Slc15a4	-0.222667	6.64727	6.43306	0.0112016	0.427534
A430078G23Rik	-0.432046	6.3229	6.45733	0.0110495	0.427534
Art4	-1.43919	1.12332	6.38064	0.0115372	0.428822
Erdr1	-1.24723	5.62474	6.369	0.0116131	0.4303
Ypel3	-0.322478	7.95382	6.34966	0.0117404	0.430997
Phf1	-0.335511	7.02136	6.36056	0.0116685	0.430997
Acyp1	-0.362757	3.57796	6.32976	0.0118728	0.433177
Sorl1	-0.266645	8.90714	6.3119	0.011993	0.434086
Unc13d	-0.249386	6.75047	6.2817	0.0121991	0.434419
Relb	-0.222227	7.16043	6.29356	0.0121177	0.434419
1110065P20Rik	-0.433207	2.91444	6.26533	0.0123123	0.437142
Cd55	-0.402746	7.98472	6.23266	0.0125415	0.438732
Ffar1	-0.339924	6.27593	6.23485	0.012526	0.438732
Cd2	-0.443302	6.07552	6.23651	0.0125143	0.438732
Rpl8	-0.265616	10.7496	6.24421	0.01246	0.438732
Scpep1	-0.233636	6.76567	6.2459	0.0124481	0.438732
Rhof	-0.276015	6.86262	6.17598	0.0129496	0.441327
Smad7	-0.356633	5.88529	6.18827	0.01286	0.441327
Tcp11l2	-0.327871	6.99102	6.19026	0.0128455	0.441327
Rasa3	-0.307857	8.41996	6.19783	0.0127907	0.441327
Yif1b	-0.307474	4.63565	6.17064	0.0129888	0.441396
Hcst	-0.567124	3.02678	6.06801	0.0137652	0.454786
Fahd1	-0.434332	2.77608	6.06882	0.0137589	0.454786
6330403A02Rik	-0.546625	3.48849	6.07302	0.0137262	0.454786
Nuak2	-0.278351	6.15967	6.08795	0.0136107	0.454786
AB124611	-0.296999	6.72044	6.0235	0.0141167	0.463822
Ssu72	-0.2027	6.01072	6.00385	0.0142747	0.466438
Rnf130	-0.250044	6.39797	5.94962	0.0147205	0.471928
Cops6	-0.248526	6.82026	5.95244	0.0146969	0.471928
Clec2d	-0.35691	6.97249	5.95316	0.0146909	0.471928
Stard10	-0.426082	4.80067	5.95329	0.0146899	0.471928
Fli1	-0.240273	7.46474	5.9758	0.0145035	0.471928
Lamb3	-0.338979	5.22255	5.91492	0.0150132	0.477139
Rpl18a	-0.297531	10.5601	5.90144	0.0151285	0.478561
Ddx25	-0.920108	2.3337	5.85774	0.0155087	0.484149
Dennd6b	-0.219745	5.88311	5.82704	0.0157816	0.488819
Dnajb2	-0.319482	5.38388	5.8284	0.0157695	0.488819
Ppargc1a	-0.797279	1.47182	5.7628	0.016369	0.490409
Gm14548	-0.753303	1.52656	5.76587	0.0163404	0.490409
Bcar3	-0.277512	7.48402	5.77555	0.0162507	0.490409
Ppp3ca	-0.201847	7.65265	5.77936	0.0162155	0.490409
Uba52	-0.501509	4.55282	5.7836	0.0161763	0.490409
Mettl23	-0.286306	5.59943	5.78588	0.0161554	0.490409
Pqlc2	-0.284034	5.03059	5.7904	0.0161139	0.490409
Nle1	-0.277679	5.6099	5.79762	0.0160479	0.490409
Ptk2b	-0.183299	8.6831	5.80747	0.0159582	0.490409
Inpp5k	-0.225765	7.0523	5.73452	0.0166346	0.490947
Pear1	-0.336982	6.01355	5.74242	0.0165599	0.490947
A630033H20Rik	-0.425105	4.48337	5.7516	0.0164737	0.490947
Rpl35	-0.29624	9.25477	5.71815	0.0167904	0.491884
Smim4	-0.4199	2.93746	5.72007	0.0167721	0.491884
Cables1	-0.534267	3.63609	5.63558	0.0175996	0.505626
Rps19	-0.284555	10.0308	5.63715	0.0175838	0.505626
Kctd14	-0.357072	3.98517	5.62007	0.0177559	0.506449
Bin2	-0.240372	7.20747	5.62656	0.0176903	0.506449
Hexb	-0.246026	6.53585	5.60139	0.0179463	0.510652
Ormdl3	-0.228854	5.34954	5.5786	0.0181813	0.511225
Rnf185	-0.238139	5.00842	5.57022	0.0182685	0.51126
Bank1	-0.363956	8.33054	5.4805	0.0192297	0.523205
Ablim1	-0.223314	8.9464	5.48659	0.0191628	0.523205
Lrrk2	-0.389647	7.09661	5.48756	0.0191522	0.523205
Acsf2	-0.219093	7.06143	5.49978	0.0190189	0.523205
Sh3bp2	-0.199784	8.1202	5.4446	0.019629	0.523897
Bloc1s3	-0.281858	4.13379	5.44798	0.019591	0.523897
Ggta1	-0.249051	5.62695	5.43489	0.0197383	0.524035
Rpl18	-0.2565	10.1705	5.43507	0.0197363	0.524035
Rabggta	-0.229494	5.83559	5.42767	0.0198201	0.525034
Ubxn6	-0.285415	4.315	5.4105	0.020016	0.525496
Snn	-0.215775	9.91662	5.40269	0.0201057	0.525577
Ccdc107	-0.298932	4.86847	5.35989	0.020605	0.533935
Atg4d	-0.203933	5.54928	5.33817	0.0208634	0.53596
Smim14	-0.271667	7.94027	5.33434	0.0209093	0.53598
Zfp273	-0.401086	2.90857	5.31735	0.0211141	0.537761
Hist1h1e	-0.79363	-0.624635	5.31159	0.0211841	0.538383
Ralgps2	-0.286401	8.28532	5.30549	0.0212583	0.539119
Gimap7	-0.453411	4.53248	5.2638	0.0217735	0.542922
Icam2	-0.290212	6.26506	5.27104	0.0216831	0.542922
Taz	-0.20776	6.83923	5.24983	0.0219489	0.543876
Sgpp2	-0.712163	1.7357	5.24331	0.0220314	0.544784
2021-09-15	-0.18412	7.12641	5.22415	0.0222753	0.54801
Nadsyn1	-0.271504	4.69371	5.21103	0.022444	0.55003
Slc39a3	-0.265243	4.94545	5.18365	0.0228004	0.556854
Col23a1	-0.565588	1.43277	5.16001	0.0231128	0.562174
Trim13	-0.607589	1.15824	5.12886	0.0235312	0.563273
Ms4a6b	-0.363393	4.63962	5.1348	0.0234508	0.563273
Nebl	-0.720807	0.108534	5.13517	0.0234458	0.563273
Cep85	-0.401977	8.65494	5.10085	0.0239141	0.565872
Hdac10	-0.207091	6.65518	5.10361	0.0238761	0.565872
Eef2	-0.178833	12.2496	5.07338	0.024296	0.56662
Tgfb3	-0.383816	5.4345	5.07872	0.0242212	0.56662
1700019L03Rik	-0.667772	0.28973	5.0804	0.0241978	0.56662
Adck3	-0.315494	5.94987	5.0368	0.0248142	0.567576
D8Ertd82e	-0.275473	5.22681	5.0383	0.0247928	0.567576
Hid1	-1.04179	0.814949	5.04459	0.024703	0.567576
Apol7e	-1.18964	-0.171313	5.05287	0.0245853	0.567576
Crisp3	-0.900493	4.56912	5.05438	0.0245638	0.567576
Psd4	-0.153981	7.93185	5.01804	0.0250845	0.569379
Rpl10	-0.208568	10.6354	4.94349	0.0261891	0.570501
Spata13	-0.279347	6.58741	4.94435	0.026176	0.570501
Dedd2	-0.211511	6.62889	4.9466	0.026142	0.570501
Rpl27a	-0.210804	10.083	4.95448	0.0260232	0.570501
Agap2	-0.181868	6.67021	4.96072	0.0259294	0.570501
Trim34a	-0.307188	6.55218	4.96174	0.0259142	0.570501
Rps10-ps1	-0.714094	0.243012	4.97377	0.0257345	0.570501
Itpkb	-0.232311	7.22734	4.97505	0.0257155	0.570501
Ccdc85b	-0.31848	4.39449	4.98332	0.0255929	0.570501
C330013J21Rik	-0.942718	-0.379685	4.98528	0.0255638	0.570501
Adck4	-0.338014	5.25225	4.98742	0.0255323	0.570501
Egr1	-0.242886	7.68387	4.92972	0.0263986	0.571922
Cyp27a1	-0.575641	3.4413	4.93105	0.0263782	0.571922
Galnt12	-0.24935	4.73366	4.85409	0.0275807	0.574509
Spns1	-0.216096	6.23999	4.8542	0.0275788	0.574509
Morn1	-0.524907	1.34317	4.85813	0.0275162	0.574509
Gm15448	-0.707872	1.35849	4.86729	0.0273705	0.574509
Rnf166	-0.244635	6.02977	4.87668	0.0272219	0.574509
Rpl13	-0.247374	10.9656	4.89195	0.0269822	0.574509
BC017643	-0.202171	7.42735	4.90283	0.0268128	0.574509
Tmem55b	-0.181682	7.04265	4.84921	0.0276588	0.575129
C330011M18Rik	-0.469956	1.34877	4.84261	0.0277648	0.576078
Rit1	-0.269339	4.25574	4.83076	0.0279563	0.577278
Ifngr2	-0.206754	6.48564	4.79233	0.0285868	0.582522
Ttpal	-0.2004	7.65367	4.7994	0.0284697	0.582522
F7	-1.72893	0.192366	4.79994	0.0284608	0.582522
Fzd9	-0.655002	-0.28389	4.80515	0.0283749	0.582522
Aaed1	-0.274512	4.98722	4.77673	0.0288469	0.585502
Map2k2	-0.19493	7.25063	4.77782	0.0288285	0.585502
A930011G23Rik	-0.26575	7.27321	4.76997	0.0289603	0.586803
Itpkc	-0.292509	3.59932	4.75566	0.0292021	0.586827
Sdr39u1	-0.29604	3.81138	4.76239	0.0290882	0.586827
Arhgap25	-0.208881	7.36904	4.75127	0.0292767	0.587213
Slc25a53	-0.285507	4.92031	4.71315	0.0299327	0.592379
Ahnak2	-1.30692	-1.04114	4.71656	0.0298734	0.592379
Hopx	-0.395758	2.68457	4.71872	0.029836	0.592379
Uckl1	-0.231308	6.17201	4.71891	0.0298326	0.592379
Snrpf	-0.31942	5.9051	4.70381	0.0300959	0.593632
Btk	-0.176193	8.03103	4.70617	0.0300545	0.593632
Cyb561d1	-0.177001	6.18213	4.66909	0.0307103	0.59587
Junb	-0.241265	7.50789	4.67682	0.0305724	0.59587
Sema4b	-0.322409	6.69617	4.67765	0.0305576	0.59587
Ifnar2	-0.235518	5.635	4.6921	0.0303017	0.59587
Npas1	-0.550526	0.943342	4.65772	0.0309142	0.598849
Sds	-1.17716	-0.819999	4.65444	0.0309733	0.599018
Zbtb7b	-0.201795	6.44374	4.63101	0.0313991	0.600746
Arhgap26	-0.257861	6.02588	4.63279	0.0313665	0.600746
Klf2	-0.388069	8.21996	4.6341	0.0313425	0.600746
Gpr160	-1.15579	0.221403	4.63439	0.0313372	0.600746
Mylip	-0.229699	6.67798	4.62687	0.0314749	0.600902
Snx9	-0.184345	7.833	4.56656	0.032602	0.601234
Tpst2	-0.234922	5.54692	4.57508	0.0324402	0.601234
Tnfrsf26	-0.349469	4.67717	4.58504	0.0322522	0.601234
Pik3c2b	-0.289715	7.17039	4.58622	0.0322301	0.601234
Zfp874a	-0.311932	4.11828	4.55557	0.0328118	0.604123
Coro1a	-0.221834	10.8477	4.55012	0.0329164	0.604179
Rps18	-0.248492	10.4943	4.53349	0.0332378	0.607266
Bend5	-0.313007	4.63095	4.53831	0.0331444	0.607266
Plbd1	-0.515798	4.26615	4.52915	0.0333221	0.607873
Il10ra	-0.221551	7.28715	4.51804	0.0335392	0.609031
Fam69a	-0.284082	5.59908	4.51182	0.0336614	0.60939
Gpr183	-0.221572	7.00936	4.51259	0.0336463	0.60939
Gm8369	-0.286438	6.99238	4.49372	0.0340195	0.610919
Prr5	-0.197259	5.90765	4.50099	0.0338751	0.610919
Esrra	-0.240597	5.51255	4.50275	0.0338404	0.610919
Slc37a3	-0.259116	4.85936	4.46376	0.0346213	0.61369
Psen2	-0.19718	6.14314	4.46413	0.0346136	0.61369
Snx29	-0.382795	5.36556	4.46791	0.0345372	0.61369
Sbno2	-0.184374	7.25245	4.47265	0.0344416	0.61369
Slc15a2	-2.89161	5.74821	4.47371	0.0344202	0.61369
Tesk1	-0.257812	5.32526	4.45564	0.0347861	0.615693
St6galnac4	-0.241071	6.64203	4.42697	0.0353753	0.620581
2021-03-02	-0.259187	5.9528	4.43031	0.035306	0.620581
A530032D15Rik	-0.362349	4.39451	4.41883	0.0355445	0.621621
Fmnl3	-0.190791	7.25354	4.39068	0.0361359	0.627447
Aldh2	-0.230208	8.3929	4.38455	0.036266	0.627872
Epb4.1l3	-1.23152	0.114951	4.36737	0.0366336	0.628569
Capn11	-2.82974	2.19	4.35651	0.0368677	0.630036
Trmt1	-0.164861	7.18147	4.27266	0.0387302	0.63277
Klhdc1	-0.331408	3.19599	4.27594	0.0386555	0.63277
Atp9a	-0.885073	0.353331	4.27731	0.0386245	0.63277
Tsen54	-0.257387	5.43473	4.28689	0.0384073	0.63277
Ppp3cc	-0.23048	6.37464	4.28804	0.0383815	0.63277
Doc2g	-0.470689	2.34986	4.29791	0.0381592	0.63277
Guk1	-0.267284	5.27613	4.30168	0.0380748	0.63277
L1cam	-0.590481	3.43517	4.31742	0.0377242	0.63277
Lgmn	-0.255879	6.7605	4.32851	0.037479	0.63277
Acot8	-0.247193	4.46407	4.32949	0.0374575	0.63277
Prcp	-0.221232	6.8523	4.33704	0.0372917	0.63277
Syngr2	-0.194704	8.77477	4.26232	0.0389666	0.633364
Jund	-0.277088	7.64287	4.25398	0.0391585	0.633675
Rpl29	-0.200181	10.0079	4.25403	0.0391574	0.633675
Tnk2	-0.152028	6.99255	4.21724	0.0400153	0.634734
Ppp1r13b	-0.222483	5.69524	4.22311	0.0398769	0.634734
Gm9843	-0.341771	4.51711	4.22518	0.0398284	0.634734
Tec	-0.241003	7.08739	4.22825	0.0397564	0.634734
Rps15	-0.258899	10.113	4.23872	0.0395119	0.634734
Ptrh1	-0.375988	2.66705	4.23942	0.0394957	0.634734
Wscd2	-1.68236	-0.622841	4.24185	0.0394391	0.634734
Cutc	-0.291089	4.22565	4.24781	0.039301	0.634734
Cotl1	-0.248503	8.61727	4.19621	0.0405145	0.638251
Plekhm1	-0.175784	7.31638	4.18951	0.0406749	0.639086
Tnfrsf12a	-0.464308	2.29388	4.18595	0.0407605	0.639585
Irf2bpl	-0.260279	6.61903	4.17906	0.0409265	0.640499
Slc35g2	-0.771629	0.499076	4.17566	0.0410085	0.64094
Apba3	-0.19822	5.34709	4.15159	0.0415955	0.642325
2310007L24Rik	-1.23545	-0.713193	4.15233	0.0415773	0.642325
Fau	-0.23094	10.1041	4.15274	0.0415673	0.642325
Apc2	-0.864611	0.172	4.15508	0.0415099	0.642325
Stap1	-0.202161	7.90306	4.16628	0.0412361	0.642325
Tprgl	-0.186806	7.01412	4.16872	0.0411769	0.642325
Samhd1	-0.233948	9.24454	4.13253	0.0420664	0.644765
Tgfbr2	-0.245284	8.73993	4.10683	0.0427105	0.644777
Mrps28	-0.269035	4.37347	4.10701	0.0427057	0.644777
Galnt10	-0.225899	5.41572	4.10938	0.0426459	0.644777
Mfsd2a	-0.420511	2.19537	4.11863	0.0424135	0.644777
Zc3h10	-0.240194	5.4048	4.12705	0.042203	0.644777
Cadm3	-0.919813	0.114939	4.09431	0.0430279	0.647815
Exoc3l4	-1.20904	-0.801899	4.03961	0.044444	0.649406
Ift46	-0.215558	4.60855	4.04035	0.0444247	0.649406
Cd46	-0.505169	2.5359	4.04435	0.0443194	0.649406
Pkib	-0.332151	4.7203	4.04505	0.0443011	0.649406
Slc26a11	-0.355767	5.12506	4.04576	0.0442825	0.649406
Dpp7	-0.230467	5.54794	4.04997	0.0441721	0.649406
Ctss	-0.209527	8.46502	4.05511	0.0440378	0.649406
Noxred1	-0.372367	2.92643	4.05816	0.0439583	0.649406
Csnk1g3	-0.153181	6.90639	4.05923	0.0439306	0.649406
Fadd	-0.226123	4.27332	4.06387	0.0438101	0.649406
Acap1	-0.247992	8.83002	4.06405	0.0438054	0.649406
Agk	-0.214414	4.62537	4.06769	0.0437109	0.649406
Npm3	-0.274559	6.19668	4.07433	0.0435395	0.649406
Usp3	-0.169099	6.03791	4.07459	0.0435327	0.649406
Mrps16	-0.239244	5.56076	4.07577	0.0435024	0.649406
Tmed4	-0.211709	5.37512	4.07595	0.0434977	0.649406
Epha1	-1.00707	-0.223338	4.02985	0.0447019	0.65088
Nox1	-0.93868	-0.58956	4.0113	0.0451964	0.655568
Pkp3	-0.271693	5.02534	4.00421	0.0453867	0.655929
Adamts14	-0.838808	-0.107039	4.00454	0.0453777	0.655929
Smap2	-0.188877	8.59587	4.00182	0.0454513	0.656065
Tnfaip8l2	-0.324325	5.67732	3.99946	0.0455149	0.65614
Mta3	-0.196777	6.10543	3.98781	0.0458306	0.656758
Cdk20	-0.385486	2.4448	3.98123	0.04601	0.658535
Nipal4	-0.643669	-0.562006	3.97697	0.0461266	0.658619
Pde4d	-0.490102	2.47006	3.97373	0.0462153	0.659094
Fam134c	-0.142253	7.48026	3.96047	0.0465808	0.660348
Rhbdf2	-0.235922	6.22053	3.96351	0.0464965	0.660348
Sp100	-0.222687	8.93196	3.94805	0.0469258	0.661273
Hepacam2	-0.535282	3.09344	3.94158	0.0471066	0.661303
Gucd1	-0.2484	6.61999	3.93446	0.0473062	0.662733
Gramd4	-0.205433	6.71955	3.91161	0.0479537	0.663547
Commd9	-0.28796	4.04895	3.91793	0.0477736	0.663547
Chmp1a	-0.15353	7.01413	3.91987	0.0477186	0.663547
Arl16	-0.271734	4.02769	3.92203	0.0476574	0.663547
Arfrp1	-0.169489	6.2289	3.92933	0.0474507	0.663547
Treml2	-0.235944	7.54999	3.90198	0.0482294	0.663935
Tymp	-0.47776	0.922842	3.89434	0.048449	0.664269
Ggt5	-0.902734	0.92648	3.88611	0.0486872	0.666327
Gltscr2	-0.212759	8.80562	3.87825	0.0489154	0.667202
Eif3f	-0.219156	8.98801	3.86434	0.0493226	0.667398
Map3k19	-0.624215	3.11165	3.86474	0.0493107	0.667398
Hist3h2a	-0.421942	2.41712	3.8672	0.0492386	0.667398
Morn3	-3.26808	0.419261	3.86756	0.0492282	0.667398
Nr1h2	-0.180281	7.43127	3.87101	0.049127	0.667398
Lax1	-0.258553	7.67785	3.87141	0.0491152	0.667398
Clcn1	-0.725683	0.0671708	3.84662	0.0498464	0.668403
Serpinb1a	-0.381745	6.65064	3.84689	0.0498382	0.668403
Sigirr	-0.219435	6.10257	3.84697	0.049836	0.668403
Sdc1	-0.330291	5.9888	3.84757	0.0498181	0.668403
Ptpn22	-0.219185	5.6063	3.85192	0.0496891	0.668403
Gimap3	-0.234931	8.14947	3.84453	0.0499085	0.668481
Elmo3	-0.293605	3.69888	3.82575	0.0504707	0.67322
Narfl	-0.221045	5.29668	3.80942	0.0509651	0.676539
Unc119b	-0.18343	7.21561	3.79653	0.0513589	0.678069
Zswim4	-0.198854	5.11349	3.79385	0.0514413	0.678317
Tnik	-0.382874	4.19439	3.78238	0.051795	0.679966
Abcb4	-0.356509	3.25848	3.75259	0.0527257	0.683917
Mpst	-0.266386	4.96568	3.75578	0.0526252	0.683917
Dhx40	-0.222514	5.45624	3.75761	0.0525677	0.683917
Lcmt2	-0.205239	4.52189	3.75837	0.0525439	0.683917
Rbms2	-0.187783	5.50914	3.74546	0.0529513	0.684568
B4galt7	-0.218938	4.90793	3.72829	0.0534981	0.686415
Itpr3	-0.203035	7.96643	3.73119	0.0534055	0.686415
Trnau1ap	-0.228799	5.45853	3.70966	0.0540984	0.686709
Grb2	-0.169952	9.13866	3.71029	0.0540779	0.686709
H2-T23	-0.29799	8.64791	3.71618	0.0538876	0.686709
Cox5a	-0.159634	6.21697	3.701	0.05438	0.687349
Atf6b	-0.192495	7.00465	3.69449	0.0545924	0.687751
Ndufa8	-0.212438	5.42673	3.69521	0.0545689	0.687751
Zfp276	-0.179656	5.40969	3.69722	0.0545033	0.687751
Dvl2	-0.179321	6.29926	3.68731	0.0548279	0.688185
Cyp2d22	-0.489362	2.89397	3.68128	0.0550267	0.688934
Dnpep	-0.191672	5.97433	3.66776	0.0554746	0.692356
Srms	-0.633968	1.67682	3.66023	0.0557261	0.694765
Satb1	-0.236575	8.49286	3.59846	0.057833	0.697835
Ppib	-0.158567	6.52025	3.60245	0.0576943	0.697835
Dpm3	-0.284397	4.51484	3.60614	0.0575667	0.697835
BC022687	-0.630187	0.0913814	3.60967	0.0574446	0.697835
Dnlz	-0.219033	5.38131	3.61771	0.0571677	0.697835
Traf5	-0.22277	6.08154	3.62707	0.0568468	0.697835
Rabac1	-0.268757	6.68521	3.63128	0.0567033	0.697835
Ethe1	-0.290724	3.84838	3.6322	0.0566719	0.697835
Serpina3g	-0.711665	4.27556	3.64626	0.0561952	0.697835
Elmsan1	-0.260291	7.61893	3.57203	0.0587605	0.698199
Fermt3	-0.201971	8.07346	3.57384	0.0586963	0.698199
Afp	-0.639637	0.460671	3.57545	0.0586395	0.698199
Lpp	-0.364296	5.48782	3.58157	0.0584241	0.698199
Mgat1	-0.148022	7.8866	3.58461	0.0583172	0.698199
Vps18	-0.199952	5.69847	3.58541	0.058289	0.698199
Ctdsp1	-0.166608	7.61388	3.58781	0.0582048	0.698199
Rnf122	-0.235629	5.55687	3.59515	0.0579484	0.698199
Add1	-0.171371	9.04651	3.56122	0.0591444	0.699268
Irgq	-0.200313	6.04208	3.56208	0.0591137	0.699268
Zfp14	-0.388735	2.34426	3.55936	0.0592105	0.699355
Smpdl3a	-0.446242	4.5172	3.53879	0.0599494	0.7025
Cd79b	-0.271361	10.3166	3.52174	0.060569	0.704211
Lats2	-0.210078	5.3374	3.52363	0.0605	0.704211
Btg2	-0.211857	8.52421	3.52748	0.0603596	0.704211
H60b	-0.442339	1.66946	3.51069	0.0609741	0.706847
D10Jhu81e	-0.199566	5.4588	3.50592	0.0611499	0.707507
Sdc4	-0.176996	6.66954	3.5	0.0613689	0.708022
E030030I06Rik	-0.363055	2.14009	3.50139	0.0613172	0.708022
Rps11	-0.203957	9.8875	3.48955	0.0617575	0.708522
Tcam1	-0.462058	0.824731	3.48964	0.0617541	0.708522
Zbtb39	-0.251245	4.96045	3.48279	0.06201	0.70918
Arhgap9	-0.161674	7.31806	3.47336	0.0623644	0.710634
Unc45a	-0.160927	6.64315	3.4385	0.0636934	0.71292
Gm10392	-1.57753	-0.685475	3.44161	0.0635738	0.71292
9930012K11Rik	-0.492047	1.33116	3.44187	0.0635636	0.71292
Bin1	-0.167573	7.99959	3.44677	0.0633754	0.71292
Pofut2	-0.207921	5.15177	3.44858	0.0633063	0.71292
Gtf3a	-0.26315	4.64397	3.45885	0.062914	0.71292
Psmb8	-0.247579	7.62243	3.43278	0.0639146	0.713133
Rps2	-0.20589	11.0018	3.4338	0.0638751	0.713133
Haao	-0.2323	6.73752	3.41381	0.0646529	0.718003
Ttc38	-0.220651	4.71121	3.41187	0.064729	0.718178
Pskh1	-0.195214	5.48607	3.40032	0.0651837	0.721876
Tmsb10	-0.218735	9.15061	3.39594	0.065357	0.722538
Atp6v0a1	-0.215647	7.49242	3.3909	0.0655572	0.723977
Cfap43	-0.159473	6.2717	3.3788	0.06604	0.727296
Fbxo25	-0.253472	3.72792	3.37507	0.0661896	0.72827
Lyl1	-0.270895	7.56131	3.36724	0.0665049	0.72921
Wdr73	-0.181795	5.2828	3.34499	0.06741	0.732883
Entpd6	-0.175915	5.6623	3.34532	0.0673965	0.732883
Nob1	-0.189261	6.0251	3.34682	0.067335	0.732883
Cyp4f18	-0.338786	6.54594	3.32134	0.0683861	0.734917
Rpl10a	-0.166564	10.1143	3.32185	0.0683649	0.734917
Ppm1f	-0.157782	5.59272	3.3253	0.0682214	0.734917
Cnbd2	-0.592968	3.76391	3.32836	0.0680949	0.734917
Tspear	-0.507565	0.622954	3.32962	0.0680425	0.734917
Mnt	-0.151879	6.6708	3.3307	0.0679978	0.734917
Rps20	-0.205226	10.2482	3.33688	0.0677431	0.734917
B3gat3	-0.206572	6.12444	3.33721	0.0677294	0.734917
Ppap2c	-0.271471	2.90354	3.31182	0.0687833	0.736371
Zfp954	-0.223995	4.17171	3.29143	0.0696423	0.738258
Fam65b	-0.212538	8.59761	3.28843	0.0697696	0.738949
Zdhhc18	-0.14983	8.55671	3.28458	0.0699333	0.739366
Rpl17	-0.212517	10.5699	3.28597	0.0698743	0.739366
Trmt44	-0.234006	4.26493	3.27687	0.070263	0.74081
Rplp1	-0.206927	10.7692	3.26689	0.0706913	0.741064
1810032O08Rik	-0.245825	4.21507	3.25617	0.0711549	0.743688
Rnf114	-0.203568	7.17239	3.24974	0.0714347	0.745956
Bspry	-0.319456	2.91863	3.23542	0.0720616	0.748395
Acp5	-0.373295	6.12979	3.23608	0.0720329	0.748395
F8a	-0.225994	4.31733	3.24099	0.0718172	0.748395
Bloc1s4	-0.205048	4.27412	3.21532	0.0729519	0.748494
Trmt61a	-0.245747	5.23424	3.21989	0.0727484	0.748494
Rin1	-0.485611	0.818906	3.20367	0.0734731	0.750764
Gtpbp3	-0.204172	5.25346	3.20386	0.0734648	0.750764
Fam26f	-0.577358	2.13963	3.14765	0.0760362	0.751267
Egln2	-0.165163	6.87225	3.14806	0.0760172	0.751267
Ddit4	-0.251696	6.7237	3.15108	0.0758769	0.751267
Trmt112	-0.170658	6.25354	3.15137	0.075863	0.751267
Abcf3	-0.177981	6.26742	3.15141	0.0758613	0.751267
1500011K16Rik	-0.257626	3.06719	3.15411	0.0757358	0.751267
Rpl11	-0.21203	9.82366	3.15575	0.0756597	0.751267
Tecpr1	-0.203911	6.76168	3.15732	0.075587	0.751267
Pfkfb4	-0.219619	5.07781	3.16756	0.0751147	0.751267
Rpl15	-0.166683	9.67446	3.16771	0.0751079	0.751267
Ero1lb	-0.162966	6.98611	3.16833	0.0750792	0.751267
Faim3	-0.223218	10.5342	3.16843	0.0750744	0.751267
Rab29	-0.231058	4.20054	3.17135	0.0749406	0.751267
Oraov1	-0.218898	4.66331	3.1725	0.0748878	0.751267
Cd83	-0.168653	9.22952	3.17418	0.0748109	0.751267
Map3k14	-0.180848	6.26704	3.1812	0.07449	0.751267
Cul9	-0.194327	4.40823	3.18428	0.0743496	0.751267
Rps3	-0.202756	10.7145	3.03317	0.0815786	0.752167
Kif9	-0.356698	2.41597	3.03334	0.0815698	0.752167
Irf8	-0.14242	9.82548	3.03544	0.0814643	0.752167
Tmem71	-0.256367	4.76551	3.0397	0.0812509	0.752167
Zfp781	-0.818536	-0.393364	3.04042	0.081215	0.752167
Hmces	-0.290889	5.03253	3.04116	0.0811779	0.752167
Pdlim2	-0.210491	5.9226	3.04289	0.0810914	0.752167
Kcnk10	-0.287014	2.70258	3.06064	0.0802101	0.752167
Plec	-0.252817	7.32624	3.06077	0.0802034	0.752167
Vav1	-0.125491	8.05196	3.06113	0.0801859	0.752167
Ppp1r16b	-0.191499	7.53313	3.06233	0.0801267	0.752167
Dgcr2	-0.137962	6.093	3.06594	0.0799489	0.752167
Inafm1	-0.27004	5.01322	3.06675	0.0799089	0.752167
Tomm7	-0.199727	5.58184	3.06873	0.079812	0.752167
Sult2b1	-0.498374	1.1143	3.06954	0.0797722	0.752167
Sytl2	-1.15765	-0.159351	3.07002	0.0797485	0.752167
Rnf220	-0.156039	7.13655	3.07038	0.0797307	0.752167
Kbtbd11	-0.301873	6.03061	3.0742	0.0795436	0.752167
Dtx1	-0.250992	7.42792	3.08126	0.079199	0.752167
Gm14446	-0.888759	2.84402	3.09539	0.0785145	0.752167
Gpatch3	-0.20294	4.22875	3.09605	0.0784824	0.752167
1810043H04Rik	-0.223214	4.30058	3.10006	0.0782893	0.752167
Gm9493	-0.329837	2.88694	3.10264	0.0781653	0.752167
Hgh1	-0.2085	5.12963	3.11027	0.0778002	0.752167
Slc27a4	-0.214123	4.80269	3.11662	0.0774972	0.752167
Sfxn3	-0.235489	6.249	3.11905	0.0773821	0.752167
Zcchc24	-0.303604	4.49527	3.12155	0.0772632	0.752167
AA467197	-0.750497	0.0432996	3.12533	0.0770842	0.752167
Rpl28	-0.216756	9.89571	3.12802	0.076957	0.752167
Unc119	-0.275018	4.95344	3.13037	0.0768463	0.752167
Zfp592	-0.132588	7.59521	3.01435	0.0825307	0.757083
Ergic3	-0.167741	6.58328	3.00471	0.0830227	0.75901
Ets2	-0.347042	6.86499	3.00498	0.083009	0.75901
Emc10	-0.152804	7.20659	2.9979	0.0833727	0.760788
Ctps2	-0.178719	6.32984	2.99376	0.083586	0.761346
Mybpc3	-0.718557	-0.0202009	2.99101	0.0837277	0.761359
Stard3	-0.163093	5.65325	2.99153	0.083701	0.761359
Zfp787	-0.217483	5.03508	2.98558	0.0840091	0.761567
2610002J02Rik	-0.23663	4.5904	2.98673	0.0839493	0.761567
Cog8	-0.159559	6.00365	2.98095	0.0842496	0.762606
Scn4a	-0.219918	7.17122	2.97555	0.0845313	0.762834
Ifnar1	-0.146257	7.52021	2.97302	0.0846636	0.76305
Sidt2	-0.131618	8.20099	2.9612	0.0852845	0.766722
Dusp5	-0.347289	5.28105	2.95438	0.0856452	0.767644
Gm2000	-0.326808	3.4474	2.95558	0.0855816	0.767644
Guca1b	-0.479447	1.49746	2.95225	0.0857579	0.767669
Sfn	-0.198969	6.58613	2.94967	0.0858952	0.768149
Sipa1	-0.176213	9.43507	2.94658	0.0860597	0.768464
Acot2	-0.182864	4.85035	2.94744	0.0860137	0.768464
Bambi	-0.565461	0.735499	2.93662	0.0865915	0.769746
Chst15	-0.160926	6.6376	2.93493	0.0866827	0.76998
Get4	-0.182315	6.09456	2.92564	0.0871824	0.771256
Tap2	-0.185629	6.88726	2.92655	0.0871335	0.771256
Arsk	-0.247359	3.78898	2.91888	0.0875487	0.771336
Sqstm1	-0.171124	7.91951	2.90419	0.0883495	0.774377
Selp	-0.836929	0.341769	2.90279	0.0884261	0.774477
Lars2	-0.957078	7.47571	2.8753	0.0899484	0.775251
Acvr1b	-0.162049	6.0061	2.88003	0.0896843	0.775251
Hvcn1	-0.21894	8.22589	2.88041	0.0896634	0.775251
Lilra6	-0.477327	2.0712	2.88724	0.0892838	0.775251
Ccm2	-0.181177	7.33928	2.89116	0.089067	0.775251
Rab6b	-0.558967	4.50566	2.89118	0.0890656	0.775251
Cbx7	-0.178459	8.4023	2.89177	0.0890329	0.775251
Tbxa2r	-0.370908	3.4073	2.89299	0.0889659	0.775251
Zcchc18	-0.263644	4.07935	2.87308	0.0900724	0.775758
Slc37a1	-0.199067	4.50111	2.85253	0.0912305	0.77604
Tacstd2	-0.331263	3.5777	2.85487	0.0910976	0.77604
Map3k11	-0.156883	7.2689	2.85606	0.0910302	0.77604
Elk4	-0.189659	7.29034	2.85661	0.090999	0.77604
Il16	-0.203474	7.3075	2.85873	0.0908794	0.77604
Fbxl22	-0.754654	0.274092	2.85896	0.0908665	0.77604
Trim8	-0.150896	7.16181	2.85919	0.0908531	0.77604
Crb3	-0.350462	2.85417	2.86504	0.0905234	0.77604
Adck5	-0.201424	4.94694	2.86728	0.0903973	0.77604
H2-Ke6	-0.678017	0.0955473	2.86974	0.0902595	0.77604
Arhgap27	-0.17588	6.95	2.84762	0.0915096	0.776884
Stat2	-0.234608	7.33613	2.84845	0.0914621	0.776884
Ccdc124	-0.237857	5.32903	2.84148	0.0918597	0.778805
Tmem160	-0.248269	4.99422	2.82983	0.092528	0.778859
Ly6g5b	-0.594223	0.600107	2.83105	0.0924582	0.778859
Ufc1	-0.211818	5.61559	2.83223	0.0923902	0.778859
Krtcap3	-0.263939	4.23189	2.83585	0.0921818	0.778859
Rpl27	-0.184612	9.39389	2.83984	0.0919534	0.778859
Hpgds	-0.362926	4.73991	2.82554	0.0927759	0.779842
2410015M20Rik	-0.230287	5.70142	2.8266	0.0927144	0.779842
Txndc16	-0.176033	7.23223	2.80241	0.0941226	0.781012
Crat	-0.249068	5.45033	2.80325	0.0940735	0.781012
Mocs2	-0.189156	4.12244	2.80627	0.0938964	0.781012
Napsa	-0.183551	8.06879	2.80846	0.0937686	0.781012
Mlst8	-0.191904	4.88819	2.81079	0.0936321	0.781012
Rpl36	-0.225073	9.30575	2.81492	0.0933916	0.781012
Igkv4-71	-0.992923	0.0940168	2.81693	0.0932748	0.781012
Ano10	-0.201709	4.3616	2.81794	0.0932157	0.781012
Nelfb	-0.124534	7.08588	2.82138	0.0930163	0.781012
Gpr146	-0.241272	4.91036	2.79821	0.0943698	0.781096
Pttg1	-0.25078	4.09337	2.77133	0.0959664	0.78329
Hrh2	-0.413279	2.2694	2.77341	0.0958421	0.78329
Slc10a3	-0.23957	4.32854	2.78005	0.0954451	0.78329
Slc39a7	-0.268737	3.53079	2.78366	0.0952302	0.78329
Tceanc	-0.239397	3.7211	2.7841	0.0952039	0.78329
Vipr1	-0.911632	-0.112556	2.75904	0.0967061	0.783531
Med6	-0.22763	3.84534	2.75925	0.0966936	0.783531
Capg	-0.234292	8.42363	2.75939	0.0966853	0.783531
Cox4i1	-0.17996	7.96575	2.75291	0.0970779	0.784938
Vasp	-0.166326	8.49432	2.75359	0.0970361	0.784938
Dcaf11	-0.128996	7.1416	2.74284	0.097691	0.785092
Rplp0	-0.160061	10.6545	2.74365	0.0976417	0.785092
Angptl6	-0.447552	0.843744	2.74369	0.0976394	0.785092
Akt2	-0.118167	7.34009	2.74408	0.0976151	0.785092
1110001J03Rik	-0.248931	3.69023	2.74585	0.0975071	0.785092
Tmem242	-0.212761	5.1343	2.74153	0.097771	0.785205
Samd9l	-0.276862	8.25057	2.72869	0.0985603	0.785708
Arhgap6	-0.378228	2.28358	2.73039	0.0984553	0.785708
Mrpl20	-0.188703	5.27612	2.73045	0.0984514	0.785708
Tlr3	-0.798101	0.624878	2.7328	0.0983067	0.785708
Rassf7	-0.236314	3.69121	2.69934	0.100389	0.785907
Ttc30b	-0.42457	1.13893	2.70129	0.100267	0.785907
Mtif3	-0.222675	4.17055	2.70271	0.100178	0.785907
Armc9	-0.307463	5.03246	2.70642	0.0999453	0.785907
Rpl32	-0.194567	10.0487	2.70848	0.0998161	0.785907
Lamtor2	-0.202951	5.41451	2.71087	0.0996668	0.785907
Ppcdc	-0.218881	6.45821	2.71371	0.0994897	0.785907
Kat8	-0.147168	5.30072	2.71394	0.0994748	0.785907
Gna15	-0.341693	3.39853	2.71502	0.0994079	0.785907
6330416G13Rik	-0.186992	4.51326	2.71608	0.0993416	0.785907
1110008P14Rik	-0.253224	4.45483	2.71628	0.099329	0.785907
Aqp1	-1.99837	-1.33503	2.69658	0.100564	0.786395
Bloc1s2	-0.165436	5.35449	2.69342	0.100763	0.78692
Tmed9	-0.160665	6.9975	2.69103	0.100915	0.787586
Rab20	-0.476503	1.53137	2.68382	0.101372	0.789396
Ctnnd1	-0.534009	0.192641	2.68473	0.101314	0.789396
Dnase2a	-0.232647	6.42139	2.68567	0.101255	0.789396
Scd1	-0.250275	9.54914	2.67679	0.101821	0.790479
Commd4	-0.203	6.46792	2.67785	0.101753	0.790479
Gga2	-0.146056	7.92865	2.66294	0.102711	0.790689
Gli1	-0.74596	-0.173452	2.66445	0.102613	0.790689
Slc35d2	-0.238042	3.62745	2.666	0.102514	0.790689
Capn1	-0.163456	7.04804	2.66739	0.102424	0.790689
Gab3	-0.398775	2.83191	2.6726	0.102089	0.790689
Rxrb	-0.134846	7.15448	2.65751	0.103062	0.790953
Map1lc3a	-0.402002	3.05209	2.6589	0.102972	0.790953
Fbxw13	-0.968352	0.765479	2.64238	0.104048	0.791781
Klf13	-0.18366	7.8807	2.64299	0.104008	0.791781
Tysnd1	-0.18303	5.54485	2.64519	0.103864	0.791781
Hsdl1	-0.129667	6.19222	2.64864	0.103638	0.791781
F2rl1	-0.576825	1.45819	2.65017	0.103539	0.791781
Snx19	-0.150548	5.65208	2.65231	0.1034	0.791781
Sh2d1b1	-0.858647	0.819905	2.63696	0.104403	0.791945
Eml3	-0.131989	7.029	2.62537	0.105168	0.792328
Cr2	-0.403393	6.99537	2.62644	0.105097	0.792328
Tbc1d17	-0.161563	7.21278	2.6267	0.10508	0.792328
Keap1	-0.148836	6.25091	2.62722	0.105045	0.792328
Omp	-0.650397	-0.614544	2.62791	0.105	0.792328
Mapkapk3	-0.152825	5.90667	2.61899	0.105592	0.793875
Rapgef1	-0.13043	8.43873	2.61965	0.105548	0.793875
Tmem128	-0.139466	5.17036	2.61637	0.105766	0.79418
Tbc1d10a	-0.169664	5.49661	2.61519	0.105845	0.794268
Dda1	-0.164295	6.27585	2.57163	0.108795	0.794429
Zdhhc13	-0.164221	5.77499	2.57228	0.108751	0.794429
Chpf2	-0.161215	5.63683	2.57461	0.108591	0.794429
Rara	-0.165673	6.79673	2.57525	0.108547	0.794429
Iah1	-0.188978	5.62618	2.58095	0.108157	0.794429
Emc4	-0.176115	4.76379	2.58398	0.10795	0.794429
Eif2b2	-0.194193	5.7101	2.58544	0.107851	0.794429
Cytip	-0.127929	8.12427	2.5899	0.107547	0.794429
Rsad1	-0.281568	4.38307	2.59205	0.107401	0.794429
Abcd4	-0.197267	4.70074	2.59258	0.107366	0.794429
Wdr20	-0.148776	5.11331	2.59691	0.107072	0.794429
Plk2	-0.349175	4.59349	2.59758	0.107027	0.794429
Rps28	-0.21062	8.80151	2.59768	0.10702	0.794429
Timm13	-0.217313	5.90024	2.60137	0.106771	0.794429
Stk10	-0.125561	8.07104	2.60698	0.106394	0.794429
Zpbp2	-0.406301	1.69443	2.61187	0.106066	0.794429
Noa1	-0.158473	5.36521	2.61196	0.106061	0.794429
Fggy	-0.44876	1.12148	2.568	0.109046	0.794723
Dgat1	-0.213362	4.88068	2.5686	0.109004	0.794723
Pgap1	-0.36831	6.67264	2.56245	0.109429	0.79654
Stk17b	-0.206025	8.78679	2.55433	0.109993	0.799666
Slc35b2	-0.155513	6.0872	2.54725	0.110486	0.801419
Polr2e	-0.178892	7.05075	2.54181	0.110867	0.802994
Gm10709	-0.401857	0.71972	2.52748	0.111879	0.807455
Eef1g	-0.148661	10.4447	2.52329	0.112177	0.808623
Ring1	-0.216612	5.77608	2.52107	0.112334	0.808781
Sdf2	-0.188891	5.47007	2.50955	0.113158	0.808838
Ticam1	-0.203661	5.91387	2.50961	0.113154	0.808838
Mettl20	-0.315912	3.05994	2.50969	0.113148	0.808838
Tmem234	-0.15959	7.17748	2.51623	0.11268	0.808838
Il9r	-0.385299	4.54714	2.5051	0.113478	0.81015
Sp140	-0.165473	8.41328	2.50548	0.113451	0.81015
Neurl2	-0.266367	3.03409	2.49851	0.113954	0.811111
Wipi2	-0.121466	7.10729	2.49852	0.113953	0.811111
Anapc16	-0.14413	5.77028	2.49913	0.113909	0.811111
Rpl3	-0.174492	10.8589	2.49922	0.113902	0.811111
Tm6sf1	-0.223997	6.09166	2.49583	0.114148	0.811521
Tcf7l2	-0.940173	0.932656	2.49622	0.11412	0.811521
Prkd2	-0.17738	7.95813	2.4861	0.114856	0.812187
Ap1g2	-0.151792	7.23706	2.48702	0.114789	0.812187
Best1	-0.918143	-0.622931	2.48776	0.114735	0.812187
2610034B18Rik	-0.871268	0.404407	2.48861	0.114673	0.812187
Sesn1	-0.167736	7.04516	2.48972	0.114592	0.812187
Naglu	-0.177296	5.58442	2.49217	0.114414	0.812187
Mdp1	-0.182148	5.8653	2.48152	0.115191	0.813104
Zfp296	-0.17888	5.16775	2.48177	0.115173	0.813104
Kcnab3	-0.442892	0.810832	2.4822	0.115141	0.813104
Tax1bp3	-0.342648	2.53564	2.47151	0.115927	0.813537
BC023829	-0.179245	4.41775	2.47223	0.115873	0.813537
Mr1	-0.241523	3.34622	2.47862	0.115404	0.813537
Fchsd2	-0.192907	7.74441	2.46933	0.116087	0.814116
Gadd45b	-0.219316	6.02726	2.46686	0.11627	0.814599
Grhpr	-0.198953	4.76367	2.45722	0.116986	0.817527
Fuca1	-0.173923	6.79287	2.4573	0.11698	0.817527
Grpel2	-0.171298	5.2071	2.44887	0.117609	0.817559
Gpr18	-0.211606	6.11565	2.44929	0.117578	0.817559
Tnfsf10	-0.323162	2.44032	2.45098	0.117451	0.817559
Rhobtb2	-0.150105	7.39972	2.45179	0.117391	0.817559
Ets1	-0.189991	9.5268	2.45421	0.11721	0.817559
Birc3	-0.134937	7.6224	2.43696	0.118506	0.818053
Pelo	-0.267462	2.56512	2.43897	0.118354	0.818053
Cox16	-0.234143	3.47672	2.44268	0.118074	0.818053
Tmem259	-0.14678	7.79662	2.44411	0.117967	0.818053
Ssc4d	-0.5075	1.19683	2.44503	0.117898	0.818053
Lrrc8a	-0.276685	3.05529	2.43446	0.118695	0.818393
St6galnac3	-0.320269	2.54494	2.43043	0.119	0.819091
Uqcc2	-0.250823	4.54213	2.41323	0.120314	0.820064
Fbxo31	-0.135717	4.86334	2.41352	0.120292	0.820064
B9d1	-0.419664	1.00627	2.41602	0.1201	0.820064
Nbl1	-0.531135	0.411577	2.41717	0.120011	0.820064
Fbxl6	-0.17034	6.34868	2.41799	0.119949	0.820064
Znhit2	-0.208359	4.61209	2.41921	0.119855	0.820064
Nt5c3	-0.212513	5.03757	2.41955	0.119829	0.820064
Chmp7	-0.152134	5.87756	2.42037	0.119767	0.820064
Rpl23a-ps3	-0.26589	3.10527	2.42179	0.119658	0.820064
Idh3g	-0.157984	7.49219	2.42218	0.119628	0.820064
Fbxo32	-0.225323	4.41899	2.42546	0.119378	0.820064
Ilvbl	-0.159993	5.96773	2.41222	0.120392	0.820125
Etv3	-0.204533	7.10448	2.40571	0.120893	0.820723
Gaa	-0.210841	6.31777	2.40928	0.120618	0.820723
Rhoh	-0.159973	6.71853	2.40127	0.121237	0.821179
Nubp1	-0.144652	6.03542	2.39938	0.121383	0.821663
Dph3	-0.198511	4.86398	2.39646	0.12161	0.822302
Pi4kb	-0.123661	6.30905	2.39423	0.121784	0.823008
Abcb6	-0.50062	0.663183	2.39257	0.121913	0.823414
Cdh17	-0.44782	1.86239	2.39148	0.121998	0.823521
Dok4	-0.410013	1.50575	2.38523	0.122487	0.82355
Zfp707	-0.218011	3.96748	2.38566	0.122453	0.82355
Slc29a2	-0.31848	3.17127	2.38666	0.122375	0.82355
Alad	-0.304212	5.53248	2.38709	0.122341	0.82355
Cd52	-0.236975	9.54914	2.38813	0.12226	0.82355
Brf2	-0.180977	3.89802	2.38167	0.122767	0.824032
Tmem126a	-0.183551	4.46263	2.38326	0.122641	0.824032
Irs2	-0.272713	7.04123	2.36654	0.123961	0.829304
Anpep	-0.752078	1.69233	2.36753	0.123883	0.829304
Ints4	-0.11629	6.85168	2.3615	0.124362	0.830581
Vill	-0.347481	3.03138	2.3007	0.129316	0.831008
Cr1l	-0.115573	6.64562	2.30182	0.129223	0.831008
Astl	-0.564713	-0.193115	2.30607	0.128869	0.831008
Atraid	-0.169928	5.07623	2.30885	0.128639	0.831008
Ppp1r11	-0.17804	5.87509	2.30887	0.128637	0.831008
Gdpd5	-0.657937	-0.00944884	2.31081	0.128477	0.831008
Cnp	-0.171001	8.40592	2.31256	0.128333	0.831008
Kat2a	-0.131641	6.68847	2.31307	0.128291	0.831008
Afmid	-0.265216	3.46581	2.31465	0.12816	0.831008
Gnb2l1	-0.144292	10.9056	2.31558	0.128083	0.831008
Zc3h12a	-0.148025	6.34359	2.31987	0.127731	0.831008
Tpt1	-0.141955	11.2327	2.32097	0.12764	0.831008
Ap1b1	-0.114751	7.14507	2.3244	0.127359	0.831008
Top3b	-0.118344	6.64496	2.32645	0.127191	0.831008
B3gnt5	-0.212585	7.97537	2.33224	0.126719	0.831008
Ap1m1	-0.119658	7.18194	2.33356	0.126612	0.831008
Adap1	-0.293808	5.08425	2.33411	0.126567	0.831008
Gm3443	-1.02011	-0.367947	2.33466	0.126522	0.831008
Txn2	-0.160373	7.196	2.33751	0.126291	0.831008
9030617O03Rik	-0.24715	3.25328	2.33795	0.126256	0.831008
Rpsa-ps10	-0.285627	3.96347	2.33968	0.126116	0.831008
Tmem9	-0.274786	3.78356	2.34207	0.125922	0.831008
Pstpip1	-0.202525	6.08554	2.34263	0.125877	0.831008
Cpsf3	-0.107651	7.09774	2.3437	0.125791	0.831008
Wbscr16	-0.170321	4.8417	2.34636	0.125576	0.831008
Fuca2	-0.202125	5.30879	2.34646	0.125568	0.831008
Itfg3	-0.24767	4.07109	2.34808	0.125438	0.831008
Ambra1	-0.118001	6.50908	2.35144	0.125167	0.831008
Mesdc2	-0.177213	4.99931	2.35235	0.125094	0.831008
Zbtb49	-0.193209	4.29761	2.35528	0.124859	0.831008
Plgrkt	-0.184837	5.72648	2.29728	0.129601	0.831879
Ctu1	-0.176744	4.23706	2.29116	0.130113	0.834117
Pepd	-0.149918	5.31064	2.28707	0.130456	0.834667
Tmem50a	-0.153856	6.89084	2.28603	0.130543	0.834774
Ldb1	-0.159429	8.01178	2.2798	0.131068	0.835438
Cpsf1	-0.119649	7.77566	2.2726	0.131678	0.836637
Gm9970	-0.902975	-0.60643	2.26497	0.132329	0.838083
Btbd2	-0.192908	5.32043	2.26572	0.132264	0.838083
Acadvl	-0.161154	5.22109	2.26153	0.132623	0.839052
Utrn	-0.29267	5.09334	2.22858	0.135478	0.839744
Sgsh	-0.175965	5.29523	2.23074	0.135289	0.839744
6030468B19Rik	-0.367227	2.44857	2.23248	0.135137	0.839744
Gm10036	-0.333036	1.52366	2.23365	0.135035	0.839744
Procr	-0.777298	-0.450323	2.23517	0.134902	0.839744
Wdr81	-0.145331	6.84319	2.23524	0.134896	0.839744
Rpl7a	-0.14611	10.1394	2.23967	0.13451	0.839744
Stap2	-0.577237	0.592552	2.24035	0.134451	0.839744
Mecr	-0.182204	4.74539	2.2418	0.134325	0.839744
Ercc5	-0.165057	4.65404	2.24347	0.13418	0.839744
Gm4955	-0.505366	5.54968	2.24414	0.134122	0.839744
Alkbh3	-0.155792	4.43408	2.2458	0.133977	0.839744
Abca1	-0.327339	6.07699	2.24714	0.133861	0.839744
Rpl31	-0.193577	9.49101	2.2494	0.133666	0.839744
Evl	-0.139403	8.29289	2.24974	0.133637	0.839744
Gm10269	-0.3747	0.960137	2.25198	0.133443	0.839744
D17H6S53E	-0.183445	4.15031	2.25552	0.133138	0.839744
Gm10053	-0.413432	0.177283	2.25679	0.13303	0.839744
Fam213a	-0.207653	6.15421	2.2276	0.135564	0.839791
Gpc1	-0.615023	1.737	2.20838	0.137263	0.839816
Rbfa	-0.137843	5.58546	2.20872	0.137232	0.839816
Apeh	-0.130439	6.95126	2.20875	0.13723	0.839816
Rgp1	-0.130133	6.47136	2.21043	0.13708	0.839816
Rpl35a	-0.22516	9.23181	2.21227	0.136917	0.839816
Taf1c	-0.126268	5.71541	2.2174	0.136463	0.839816
AU040320	-0.127552	5.99889	2.21771	0.136435	0.839816
Gem	-0.154159	4.75222	2.21829	0.136384	0.839816
Snx17	-0.142479	6.81994	2.21856	0.13636	0.839816
Rps5	-0.172284	10.3781	2.21862	0.136354	0.839816
Gadd45gip1	-0.155746	5.04753	2.22333	0.135939	0.839816
Cd37	-0.16304	10.2681	2.22363	0.135913	0.839816
Per1	-0.150307	6.95293	2.22409	0.135873	0.839816
Smpd2	-0.180369	4.51621	2.22502	0.135791	0.839816
Tmem43	-0.144765	5.59059	2.20574	0.137498	0.839961
Pdrg1	-0.13625	6.08534	2.20689	0.137396	0.839961
Dnah17	-0.340989	2.05899	2.20148	0.137878	0.841418
Gm12942	-0.253398	3.42741	2.19392	0.138556	0.841607
Fam83f	-0.952262	0.0614329	2.1942	0.138531	0.841607
Tmem186	-0.15133	5.09666	2.19433	0.13852	0.841607
Mepce	-0.155681	6.78248	2.19654	0.13832	0.841607
Alkbh7	-0.234081	3.88868	2.19669	0.138307	0.841607
Krtcap2	-0.178282	5.58965	2.18966	0.13894	0.841851
Tmem80	-0.164096	5.21268	2.19015	0.138896	0.841851
Znrd1	-0.16101	4.94412	2.19114	0.138806	0.841851
Dclk2	-0.210343	6.75425	2.18332	0.139513	0.841894
Slc4a10	-0.976425	-0.783551	2.18637	0.139237	0.841894
Sidt1	-0.241866	3.95007	2.18692	0.139187	0.841894
Hebp1	-0.72507	0.120374	2.11018	0.146322	0.842379
Cd69	-0.282744	4.92225	2.11044	0.146297	0.842379
Lmf1	-0.203706	4.22584	2.11136	0.146209	0.842379
Ndufa9	-0.155554	5.91597	2.1117	0.146177	0.842379
Bri3	-0.210891	5.15457	2.11239	0.146111	0.842379
9330161L09Rik	-0.61314	-0.465407	2.1133	0.146024	0.842379
Anks3	-0.13441	6.25925	2.11442	0.145917	0.842379
Atp6v0d1	-0.168508	6.64937	2.11484	0.145877	0.842379
Eps8l1	-0.783715	6.08748	2.11536	0.145828	0.842379
Chd3	-0.126814	8.18983	2.11673	0.145697	0.842379
Mocs3	-0.185194	4.23856	2.11767	0.145608	0.842379
Gmfg	-0.260418	6.563	2.11892	0.145489	0.842379
Sh3bgrl3	-0.19651	8.25192	2.11998	0.145389	0.842379
Tbck	-0.187327	4.73645	2.12198	0.145199	0.842379
Mknk2	-0.145811	9.20332	2.12402	0.145006	0.842379
1700021K19Rik	-0.146405	7.96506	2.12722	0.144703	0.842379
Stx5a	-0.139303	6.75746	2.12812	0.144618	0.842379
Rnls	-0.28991	2.03331	2.12876	0.144558	0.842379
Aspscr1	-0.144744	6.07816	2.12883	0.144551	0.842379
Tor1a	-0.165079	5.08838	2.13027	0.144416	0.842379
Ctns	-0.163443	4.87772	2.1308	0.144365	0.842379
Irak2	-0.174575	6.89962	2.13089	0.144357	0.842379
Gfod2	-0.261747	2.07074	2.13149	0.1443	0.842379
Pacs1	-0.15139	6.83311	2.13234	0.144221	0.842379
Snrpd3	-0.191347	6.61134	2.13536	0.143937	0.842379
Hddc3	-0.321073	1.37044	2.13598	0.143878	0.842379
Wbscr22	-0.142968	5.92741	2.1361	0.143867	0.842379
Spr	-0.196474	3.53313	2.13752	0.143734	0.842379
Zyx	-0.185025	6.59232	2.13946	0.143553	0.842379
Slc23a1	-0.380492	1.59603	2.141	0.143408	0.842379
Lsr	-0.442992	1.11182	2.14245	0.143273	0.842379
Tigd2	-0.165895	5.14362	2.14246	0.143272	0.842379
Rps13	-0.156787	9.65937	2.14566	0.142973	0.842379
Lmbr1l	-0.148386	6.81291	2.14615	0.142928	0.842379
Hes1	-0.323272	2.69977	2.15031	0.142541	0.842379
Chchd4	-0.166408	4.98874	2.15241	0.142346	0.842379
Plcl2	-0.141371	6.86832	2.15374	0.142224	0.842379
Rpl37	-0.180798	9.08651	2.15548	0.142062	0.842379
Usp35	-0.271527	3.44609	2.15559	0.142051	0.842379
Cmklr1	-0.841133	1.76589	2.15957	0.141685	0.842379
Rnf7	-0.153823	5.48789	2.16279	0.141388	0.842379
Nfkbie	-0.139596	8.43018	2.16347	0.141326	0.842379
Uap1l1	-0.239769	6.26654	2.16398	0.141278	0.842379
Pank4	-0.103566	6.54723	2.16568	0.141123	0.842379
Bahcc1	-1.19273	-0.0163335	2.16728	0.140976	0.842379
Bop1	-0.141057	6.88004	2.16859	0.140855	0.842379
Rps7	-0.172759	10.5362	2.17068	0.140664	0.842379
Traf7	-0.110097	7.50603	2.17098	0.140636	0.842379
Fcrl5	-0.223983	4.36217	2.17148	0.140591	0.842379
Txndc17	-0.164905	5.03702	2.17199	0.140545	0.842379
Gm9949	-0.619189	-0.354766	2.17299	0.140453	0.842379
Nrros	-0.13031	7.82171	2.10565	0.146756	0.843909
Sharpin	-0.153501	6.84755	2.10183	0.147123	0.844538
Iqsec1	-0.126362	8.21255	2.10215	0.147092	0.844538
Osbpl5	-0.177831	4.94078	2.09074	0.148194	0.84457
Arrdc1	-0.173583	6.61459	2.09112	0.148158	0.84457
Wdfy4	-0.163606	9.52164	2.09196	0.148076	0.84457
Bcl7c	-0.194859	5.74677	2.09626	0.14766	0.84457
Psd3	-0.245845	3.70662	2.09707	0.147582	0.84457
Sar1a	-0.101292	7.08457	2.0971	0.147579	0.84457
Sufu	-0.166393	6.70561	2.0973	0.14756	0.84457
Ctu2	-0.159263	5.86987	2.08874	0.148389	0.845123
Map1lc3b	-0.125625	7.04064	2.07438	0.149791	0.845169
Ttc28	-0.256714	3.85709	2.07469	0.14976	0.845169
Cd82	-0.161786	6.64134	2.07694	0.14954	0.845169
Mpp2	-0.786768	-0.860192	2.07748	0.149487	0.845169
Cyb5d1	-0.180495	4.35384	2.07902	0.149336	0.845169
Ddit3	-0.282452	4.9236	2.08251	0.148995	0.845169
Gba	-0.148093	6.13498	2.08307	0.148941	0.845169
Eif2ak3	-0.148825	7.04406	2.08314	0.148933	0.845169
Epsti1	-0.26169	5.40433	2.08561	0.148693	0.845169
Zkscan5	-0.173992	4.03756	2.06897	0.150323	0.845171
Rad52	-0.192192	4.63502	2.06983	0.150238	0.845171
Slc12a6	-0.146353	8.06008	2.07253	0.149972	0.845171
Rps6ka1	-0.142639	7.61191	2.07269	0.149957	0.845171
Rnf167	-0.145141	7.28967	2.06281	0.150931	0.846382
Tnfrsf17	-0.955601	-0.597717	2.059	0.15131	0.847285
2410016O06Rik	-0.156981	4.63032	2.05453	0.151754	0.848992
Pttg1ip	-0.126982	6.02929	2.05356	0.151851	0.849137
Sec22c	-0.216223	4.07206	2.04201	0.153008	0.849376
Trit1	-0.146275	4.94335	2.0432	0.152888	0.849376
Adprhl2	-0.140668	5.8827	2.04385	0.152823	0.849376
Det1	-0.165934	4.4348	2.04619	0.152587	0.849376
Laptm5	-0.132081	9.89549	2.04005	0.153205	0.849519
Rpsa	-0.167114	11.5327	2.03527	0.153686	0.850446
Dkk2	-0.894469	-0.768631	2.03747	0.153465	0.850446
Map3k9	-0.242074	4.68978	2.01996	0.155243	0.850905
Plekha7	-0.35929	1.97159	2.02015	0.155223	0.850905
Slc35a4	-0.10507	7.1592	2.02034	0.155204	0.850905
Thumpd2	-0.214255	3.12591	2.0212	0.155117	0.850905
Mcts2	-0.281189	1.74115	2.02221	0.155013	0.850905
Eef1a1	-0.13959	13.5677	2.02388	0.154843	0.850905
Pyurf	-0.176134	3.73555	2.02484	0.154745	0.850905
Pisd	-0.152475	4.41449	2.02572	0.154656	0.850905
Aes	-0.191147	7.6321	2.02767	0.154458	0.850905
Pitpna	-0.123198	8.13794	2.0284	0.154383	0.850905
Lsm4	-0.196514	6.87011	2.03211	0.154006	0.850905
Apex1	-0.189347	4.86745	2.00713	0.156561	0.852381
Gabbr1	-0.265944	6.08471	2.0078	0.156493	0.852381
2010109A12Rik	-0.567296	-0.102651	2.00782	0.15649	0.852381
Plekho1	-0.205374	7.53073	2.00915	0.156353	0.852381
Epn1	-0.132911	8.11405	2.00917	0.15635	0.852381
Ttc17	-0.124437	5.6517	2.0106	0.156203	0.852381
Tmem147	-0.157392	5.3674	2.01175	0.156085	0.852381
Capn3	-0.547514	0.526818	2.01483	0.155769	0.852381
Nfe2l3	-0.703771	-0.168828	2.00496	0.156786	0.853069
Tfeb	-0.194249	6.66161	1.99976	0.157324	0.855183
Dennd3	-0.190056	6.42743	1.99361	0.157963	0.856621
Foxd2	-0.433048	1.12986	1.99042	0.158297	0.857758
Rpl41	-0.176996	10.0523	1.9864	0.158717	0.858084
Cyba	-0.173445	8.20556	1.98678	0.158678	0.858084
Pus1	-0.146142	5.47977	1.9869	0.158666	0.858084
Crlf2	-0.208358	6.66743	1.9879	0.158561	0.858084
Polr1c	-0.152914	6.39177	1.98449	0.158918	0.858779
Plbd2	-0.145243	6.32115	1.97993	0.159397	0.859417
Atrip	-0.156706	5.08022	1.9809	0.159296	0.859417
Cyp4v3	-0.228777	4.06959	1.97808	0.159592	0.859577
Smim12	-0.207882	4.48852	1.97495	0.159924	0.859916
Lrrc75a	-0.238167	3.4216	1.97256	0.160177	0.860254
Slc52a2	-0.167822	5.00184	1.95799	0.161728	0.862212
Zfp459	-0.364531	1.39195	1.95819	0.161707	0.862212
Man1a	-0.172615	9.09823	1.95853	0.16167	0.862212
Pusl1	-0.182879	3.9666	1.95875	0.161647	0.862212
Zfp366	-0.600821	0.714211	1.95946	0.161571	0.862212
Foxred1	-0.138443	5.78397	1.96015	0.161497	0.862212
Atp5s	-0.212184	3.25789	1.96364	0.161125	0.862212
Chtop	-0.0905537	8.08454	1.95416	0.162139	0.862468
Rbbp9	-0.243857	3.40356	1.95449	0.162104	0.862468
Sgpl1	-0.13638	7.15006	1.9466	0.162954	0.863798
Rab25	-0.614083	-0.471685	1.94957	0.162634	0.863798
Rnase6	-0.240115	6.71568	1.94077	0.163585	0.865514
Agbl3	-0.275424	2.60021	1.94102	0.163557	0.865514
Fdx1l	-0.489797	-0.137612	1.94124	0.163534	0.865514
Mrps11	-0.201632	4.33619	1.94236	0.163412	0.865514
Rundc1	-0.123343	5.42821	1.93985	0.163685	0.865662
Cacna2d2	-0.643727	-0.0585849	1.93691	0.164005	0.866965
Eif3d	-0.128893	7.05731	1.92536	0.165267	0.868236
Zfp672	-0.124046	4.91578	1.92538	0.165264	0.868236
Mus81	-0.175651	5.03815	1.92629	0.165164	0.868236
Gnl1	-0.141958	6.82545	1.92747	0.165036	0.868236
Rin3	-0.170912	7.47249	1.92804	0.164974	0.868236
Scn4b	-0.75337	0.036053	1.92894	0.164874	0.868236
Rps17	-0.170393	9.43485	1.9301	0.164747	0.868236
Vps33a	-0.112035	6.28254	1.93054	0.1647	0.868236
Kremen1	-0.158584	4.68621	1.9317	0.164572	0.868236
Fam102a	-0.149269	6.82412	1.93179	0.164562	0.868236
H3f3a	-0.139528	9.4023	1.91982	0.165876	0.869625
Plekhj1	-0.166354	6.31708	1.91875	0.165994	0.869751
Itm2b	-0.160385	8.36445	1.91491	0.166419	0.870825
Lyn	-0.103432	8.48869	1.91511	0.166397	0.870825
Zfp831	-0.229476	6.33152	1.91316	0.166613	0.871264
Limd2	-0.232775	8.97024	1.9029	0.167754	0.871293
Gvin1	-0.448377	4.40664	1.90293	0.167751	0.871293
B3gnt1	-0.205309	3.41238	1.90526	0.167491	0.871293
Ezr	-0.103822	8.87935	1.90533	0.167483	0.871293
Gtf2h4	-0.140563	4.96473	1.90729	0.167265	0.871293
Padi2	-0.569103	3.21776	1.90929	0.167043	0.871293
Fam154b	-0.543604	-0.236554	1.90945	0.167024	0.871293
AU041133	-0.2567	2.57917	1.90974	0.166993	0.871293
Thoc5	-0.124452	5.96849	1.91059	0.166897	0.871293
Uqcc1	-0.135011	4.84684	1.91076	0.166879	0.871293
Sssca1	-0.195815	4.56612	1.89293	0.168872	0.872909
Gpx7	-0.413984	0.265936	1.89346	0.168812	0.872909
Scyl1	-0.126325	6.18309	1.89348	0.168809	0.872909
Naprt	-0.325018	1.57884	1.89422	0.168727	0.872909
Rgs13	-0.455407	2.57109	1.89498	0.168641	0.872909
Leng9	-0.217199	3.65639	1.89559	0.168572	0.872909
Lypla2	-0.140595	7.12425	1.88788	0.169441	0.873949
Elp3	-0.126773	6.24518	1.88843	0.169379	0.873949
Wdr6	-0.125502	7.03751	1.88892	0.169324	0.873949
Snai1	-0.301521	1.07848	1.88906	0.169308	0.873949
Ap5s1	-0.180516	3.83204	1.88977	0.169228	0.873949
Rnf41	-0.126609	5.9209	1.88675	0.169569	0.874235
Parvg	-0.113477	7.93461	1.88096	0.170225	0.876262
Trim12a	-0.156857	6.95475	1.87477	0.17093	0.876687
Tmem189	-0.141098	5.53826	1.87648	0.170735	0.876687
Echs1	-0.132139	5.43079	1.87396	0.171022	0.876783
Pxk	-0.125162	8.23245	1.87064	0.171402	0.877062
Btnl1	-0.544279	0.539417	1.86787	0.171719	0.878084
Dctn2	-0.114414	6.83734	1.86321	0.172255	0.87975
Sptlc1	-0.135621	5.75306	1.8536	0.173366	0.880191
Coa3	-0.196341	5.21999	1.85498	0.173206	0.880191
Ndufa6	-0.157551	5.93734	1.85588	0.173101	0.880191
Malt1	-0.139347	7.86978	1.85627	0.173056	0.880191
Got1	-0.141577	6.29569	1.85717	0.172951	0.880191
Mad2l2	-0.197074	4.8809	1.85738	0.172928	0.880191
Rpl19	-0.148864	10.1506	1.85841	0.172808	0.880191
Spsb2	-0.21862	3.3518	1.85075	0.173696	0.880247
Gm26529	-0.441115	0.373582	1.85121	0.173643	0.880247
Xab2	-0.122991	7.14553	1.85183	0.173571	0.880247
Rras	-0.197411	3.63433	1.8495	0.173841	0.880607
Fbxo4	-0.168985	5.5543	1.84552	0.174305	0.88162
Tomm5	-0.160832	5.5038	1.84243	0.174666	0.881784
Cope	-0.131484	6.89708	1.84248	0.174661	0.881784
Aldh1b1	-0.325623	2.92301	1.84309	0.174589	0.881784
Rps21	-0.202419	9.41741	1.83384	0.175674	0.882006
Rnf146	-0.168014	4.18179	1.83536	0.175496	0.882006
Adcy5	-0.612772	-0.575017	1.83841	0.175137	0.882006
Prrt3	-0.411923	0.946391	1.84008	0.174941	0.882006
Fbl	-0.157564	8.00279	1.82936	0.176203	0.882427
Dll1	-0.533732	1.11509	1.83012	0.176113	0.882427
Dopey2	-0.186506	5.6639	1.82769	0.1764	0.882708
Rassf2	-0.118812	8.50737	1.81618	0.177769	0.884406
Fbxo46	-0.150404	5.40104	1.81779	0.177576	0.884406
Midn	-0.137795	7.28953	1.81987	0.177329	0.884406
Zdhhc7	-0.140534	5.76134	1.82014	0.177297	0.884406
Nosip	-0.160214	6.19317	1.82015	0.177295	0.884406
Zscan2	-0.214847	3.3545	1.82185	0.177093	0.884406
Peli2	-1.09435	0.0166983	1.79429	0.180404	0.884635
Plekhg3	-0.210416	4.54195	1.79595	0.180202	0.884635
Phb2	-0.140237	8.10054	1.79596	0.180202	0.884635
Nubp2	-0.147816	6.26185	1.80064	0.179635	0.884635
Gm2a	-0.121274	7.81171	1.8016	0.17952	0.884635
Pnpla6	-0.118454	6.31182	1.80273	0.179382	0.884635
Impdh1	-0.160112	5.58555	1.80302	0.179348	0.884635
Gimap4	-0.156844	7.81884	1.80661	0.178916	0.884635
Haghl	-0.191748	4.49452	1.8076	0.178796	0.884635
Arhgap15	-0.133212	6.00328	1.81103	0.178385	0.884635
Apbb1	-0.347971	2.29201	1.81135	0.178346	0.884635
Carns1	-0.198905	5.82348	1.81247	0.178212	0.884635
Dgka	-0.159263	7.99048	1.74793	0.186138	0.885214
Zfp1	-0.160807	4.37166	1.74848	0.186068	0.885214
Prss36	-0.255449	2.46468	1.74871	0.186039	0.885214
Ebpl	-0.204522	3.32002	1.74947	0.185944	0.885214
Abca7	-0.111388	7.26632	1.74994	0.185884	0.885214
Polr2f	-0.19274	5.32285	1.7518	0.185651	0.885214
Zfp791	-1.04214	-0.597309	1.75401	0.185373	0.885214
Aldoa	-0.15255	9.58835	1.75478	0.185277	0.885214
Ssbp4	-0.270911	5.32374	1.75838	0.184827	0.885214
Inpp5e	-0.125086	5.55278	1.76073	0.184534	0.885214
Slc7a6os	-0.109428	5.91318	1.76125	0.184469	0.885214
Oxld1	-0.242872	2.73097	1.76146	0.184443	0.885214
Mob2	-0.155281	5.0057	1.76221	0.18435	0.885214
Zmiz2	-0.0880888	8.96315	1.76455	0.184058	0.885214
4930523C07Rik	-0.136998	7.03701	1.76605	0.183871	0.885214
Atp2a1	-0.257034	2.57566	1.76755	0.183686	0.885214
Dapk3	-0.158486	5.73976	1.76872	0.18354	0.885214
Rhbdd1	-0.197626	4.79141	1.76903	0.183502	0.885214
Urgcp	-0.121224	5.10645	1.76905	0.183499	0.885214
Themis2	-0.149203	7.13735	1.76943	0.183453	0.885214
Cdkl3	-0.310629	2.14878	1.77056	0.183313	0.885214
Ndufa13	-0.181828	5.63615	1.77217	0.183114	0.885214
Rab5b	-0.113794	7.05599	1.77341	0.182961	0.885214
Tmem55a	-0.178636	3.64001	1.7744	0.182839	0.885214
Ntmt1	-0.183733	4.2825	1.7747	0.182802	0.885214
Rab8a	-0.149702	7.16257	1.77518	0.182742	0.885214
Gbp8	-0.303986	1.75249	1.77705	0.182512	0.885214
Ttc39c	-0.904918	-0.347876	1.77759	0.182446	0.885214
Glyctk	-0.246965	2.56041	1.78101	0.182025	0.885214
Zfp719	-0.278972	3.15377	1.78201	0.181903	0.885214
Sbsn	-0.467789	0.495013	1.7851	0.181524	0.885214
Traf1	-0.175986	6.61146	1.78665	0.181335	0.885214
Irgm2	-0.324414	4.5819	1.78897	0.181052	0.885214
Amd2	-0.464308	-0.466114	1.78898	0.181051	0.885214
Rps3a1	-0.145078	10.7553	1.78921	0.181022	0.885214
Selo	-0.154264	4.58773	1.78998	0.180929	0.885214
Stx6	-0.112059	6.16293	1.7358	0.187672	0.886384
Rpl14	-0.165526	10.2818	1.73694	0.187527	0.886384
Yjefn3	-0.507742	0.305641	1.73841	0.18734	0.886384
Rtcb	-0.121479	7.72873	1.73844	0.187336	0.886384
Il17ra	-0.0978762	7.91262	1.74009	0.187128	0.886384
C030017K20Rik	-0.672142	1.81055	1.74165	0.18693	0.886384
2310045N01Rik	-0.14763	5.37074	1.74214	0.186868	0.886384
Scube3	-0.637767	0.393748	1.74294	0.186766	0.886384
Rab3a	-0.289747	2.79105	1.73142	0.18823	0.88771
Hspg2	-0.313255	1.52567	1.73173	0.18819	0.88771
Asb13	-0.123041	5.3474	1.68616	0.194108	0.888651
Plac8	-0.25917	7.73524	1.6865	0.194063	0.888651
Mreg	-0.174982	6.71711	1.68665	0.194043	0.888651
Ppm1l	-0.186339	4.47109	1.68757	0.193921	0.888651
Ms4a1	-0.154611	9.77496	1.6888	0.193759	0.888651
Apmap	-0.143782	4.77662	1.68949	0.193668	0.888651
Serp1	-0.114575	9.347	1.69352	0.193138	0.888651
Rnf144a	-0.212148	6.72974	1.69379	0.193103	0.888651
Gm10076	-0.162169	7.9423	1.69403	0.193071	0.888651
Kctd12	-0.176515	6.44967	1.69415	0.193055	0.888651
Samm50	-0.137538	6.75288	1.69531	0.192903	0.888651
Qtrt1	-0.158294	4.80934	1.69599	0.192813	0.888651
Psmg3	-0.184941	3.64189	1.69673	0.192716	0.888651
Rnf215	-0.1397	5.38432	1.69816	0.192529	0.888651
Mxd4	-0.186252	7.51455	1.69832	0.192507	0.888651
Pde3b	-0.231695	6.85363	1.69922	0.19239	0.888651
Fam104a	-0.172295	5.51555	1.69942	0.192363	0.888651
Mrps34	-0.164807	4.1952	1.70167	0.19207	0.888651
Ier2	-0.130391	7.20818	1.70314	0.191878	0.888651
Lrsam1	-0.157202	4.19345	1.70409	0.191754	0.888651
Polr3d	-0.172834	4.994	1.70632	0.191463	0.888651
Tmbim6	-0.110776	8.77596	1.70729	0.191338	0.888651
Gm4070	-0.550555	3.52718	1.71012	0.19097	0.888651
Isoc2a	-0.184266	5.16868	1.71137	0.190808	0.888651
Irak4	-0.140339	5.52521	1.71165	0.190772	0.888651
Il1a	-0.61953	-0.274832	1.71327	0.190561	0.888651
Pik3cd	-0.110673	9.20937	1.71438	0.190418	0.888651
Ndufb7	-0.167838	6.18916	1.71497	0.190341	0.888651
Hps6	-0.139282	4.21799	1.71547	0.190277	0.888651
Rrp7a	-0.131531	6.40838	1.71575	0.190241	0.888651
Rps8	-0.147956	10.4562	1.71876	0.189853	0.888651
Mterf2	-0.189288	3.41119	1.71923	0.189792	0.888651
Gnpnat1	-0.577812	-0.479723	1.71962	0.189742	0.888651
Pes1	-0.125798	7.45471	1.71976	0.189724	0.888651
Gsn	-0.185007	5.90112	1.72011	0.189679	0.888651
Abca17	-0.506249	-0.109744	1.72162	0.189485	0.888651
Il1rap	-0.177799	3.47056	1.72332	0.189267	0.888651
Nxn	-0.196055	3.61265	1.72567	0.188965	0.888651
Rasa4	-0.262705	4.93906	1.72664	0.18884	0.888651
Dusp2	-0.148524	7.85887	1.72674	0.188827	0.888651
Abhd17a	-0.168142	6.99131	1.72721	0.188767	0.888651
BC106179	-0.398335	2.35268	1.68316	0.194505	0.889788
Acy1	-0.153686	4.53416	1.65088	0.198839	0.890657
Mtmr7	-0.542009	0.385275	1.65092	0.198834	0.890657
Acss1	-0.139449	6.52836	1.65145	0.198762	0.890657
Ndufs2	-0.121296	7.35137	1.65193	0.198697	0.890657
Zfp429	-0.153073	4.09913	1.65363	0.198466	0.890657
Batf3	-0.595397	0.724703	1.65493	0.198289	0.890657
Uqcr11	-0.21631	5.04953	1.65697	0.198013	0.890657
Cdk9	-0.100167	7.64305	1.65912	0.197723	0.890657
Abcg1	-0.359604	3.81302	1.65926	0.197704	0.890657
Saysd1	-0.173648	3.6852	1.66218	0.197309	0.890657
Diras2	-0.281116	3.32664	1.66322	0.197169	0.890657
Arpc1b	-0.150034	9.06491	1.66351	0.19713	0.890657
Fas	-0.237464	2.46262	1.66365	0.197112	0.890657
Dph2	-0.145515	5.48848	1.66551	0.19686	0.890657
Zxdc	-0.133416	4.90656	1.66579	0.196823	0.890657
Trim14	-0.186722	5.16968	1.66614	0.196776	0.890657
Rps4x	-0.13417	10.7953	1.66827	0.196491	0.890657
Ptpn1	-0.0909819	7.97849	1.66857	0.19645	0.890657
Irf3	-0.144167	7.22012	1.6696	0.196313	0.890657
Chic2	-0.156804	5.51922	1.67006	0.19625	0.890657
Tpp1	-0.132229	7.16597	1.67025	0.196226	0.890657
Psmc5	-0.134733	7.08172	1.67046	0.196196	0.890657
Rraga	-0.125642	6.6955	1.67057	0.196182	0.890657
Serpinb6a	-0.25305	3.19175	1.67091	0.196137	0.890657
Nnat	-0.534584	0.534339	1.67274	0.195892	0.890657
Hs1bp3	-0.18699	4.03833	1.67602	0.195454	0.890657
Tmed10	-0.10715	7.22478	1.67614	0.195438	0.890657
Txnrd2	-0.172191	4.7672	1.67651	0.195389	0.890657
D17Wsu104e	-0.153577	5.35614	1.67981	0.194949	0.890657
Nudt2	-0.194125	3.08422	1.64725	0.199333	0.891305
B3gnt9	-0.490055	0.158516	1.64779	0.199259	0.891305
Lipt2	-0.23187	2.20307	1.64401	0.199776	0.891607
Zfp316	-0.160003	3.91357	1.57099	0.210063	0.891832
Vps37b	-0.143554	5.73693	1.57228	0.209876	0.891832
Csk	-0.13058	9.37249	1.57233	0.209869	0.891832
Nckap1l	-0.0791436	8.84271	1.5725	0.209844	0.891832
Kctd2	-0.140394	5.38757	1.57296	0.209778	0.891832
Snx14	-0.155709	4.50333	1.57393	0.209637	0.891832
Rbm45	-0.101967	5.68987	1.57561	0.209394	0.891832
Tgif1	-0.148905	7.19118	1.5764	0.20928	0.891832
Fam96b	-0.167071	4.81419	1.57872	0.208945	0.891832
Vps8	-0.144276	5.80952	1.57923	0.208871	0.891832
Trim30b	-0.280206	6.28273	1.58129	0.208576	0.891832
Aph1a	-0.102345	6.10314	1.58292	0.208341	0.891832
Gm9396	-0.407176	0.796587	1.58298	0.208331	0.891832
Phf23	-0.120763	6.5752	1.58536	0.207991	0.891832
Stk11ip	-0.10581	7.16184	1.58734	0.207707	0.891832
Trappc6b	-0.115265	5.44971	1.58828	0.207572	0.891832
Tomm20	-0.131542	6.72154	1.59074	0.20722	0.891832
Dtx2	-0.137478	5.18221	1.59149	0.207113	0.891832
Xlr4a	-0.286009	3.25122	1.59161	0.207096	0.891832
Csrnp1	-0.117806	6.24363	1.59377	0.206788	0.891832
Sema5a	-0.475555	1.83327	1.59534	0.206565	0.891832
Ddx56	-0.109674	6.33692	1.59669	0.206373	0.891832
Cox19	-0.167845	4.16753	1.59913	0.206026	0.891832
Gm21992	-0.426079	0.171479	1.59914	0.206025	0.891832
Fhl3	-0.165043	5.68408	1.6002	0.205875	0.891832
Ccdc71l	-0.143374	5.68919	1.60119	0.205735	0.891832
Tmem203	-0.220074	3.11082	1.60162	0.205674	0.891832
Arrdc2	-0.181676	4.09823	1.60242	0.20556	0.891832
Chst10	-0.246421	5.91563	1.60316	0.205456	0.891832
Zfp180	-0.116766	5.35139	1.60541	0.205139	0.891832
Isca2	-0.152868	4.9749	1.60588	0.205072	0.891832
Dvl1	-0.0972195	7.04778	1.60749	0.204845	0.891832
Slc38a10	-0.10648	7.11853	1.61064	0.204401	0.891832
Plekha3	-0.124506	4.86415	1.61076	0.204385	0.891832
Ptpdc1	-0.224264	3.08453	1.61121	0.204322	0.891832
Acd	-0.153557	6.6052	1.61211	0.204195	0.891832
Nit1	-0.145042	5.2909	1.61337	0.204018	0.891832
Edem2	-0.15068	5.95267	1.61415	0.20391	0.891832
Gm6658	-0.340448	0.850965	1.61437	0.203879	0.891832
Slc26a10	-0.275159	1.9235	1.61438	0.203877	0.891832
Ndufb8	-0.164351	5.31442	1.61483	0.203814	0.891832
Tssc1	-0.148398	4.72103	1.61743	0.203451	0.891832
Nr4a1	-0.171172	8.26861	1.6193	0.20319	0.891832
Ctdnep1	-0.149134	6.71384	1.62062	0.203005	0.891832
Msto1	-0.14936	5.09002	1.62064	0.203002	0.891832
Mrps18b	-0.150819	4.64828	1.62157	0.202873	0.891832
Klhl15	-0.214777	3.53415	1.62543	0.202336	0.891832
Gimap1	-0.143611	7.69619	1.62631	0.202215	0.891832
Mrpl41	-0.212818	4.8493	1.62762	0.202033	0.891832
Usp30	-0.135405	5.26582	1.6282	0.201952	0.891832
Ints1	-0.09153	7.54289	1.62847	0.201915	0.891832
Gimap6	-0.155711	8.23338	1.62921	0.201812	0.891832
Smg8	-0.136149	5.235	1.63142	0.201506	0.891832
Metap1d	-0.152293	5.56228	1.63393	0.20116	0.891832
Map3k10	-0.185968	4.51778	1.63397	0.201155	0.891832
N4bp2l1	-0.125618	6.26333	1.63495	0.20102	0.891832
Psmb7	-0.131451	6.23753	1.63495	0.20102	0.891832
Vmn2r97	-0.690846	3.19301	1.63526	0.200977	0.891832
Exoc8	-0.1658	4.92428	1.63551	0.200943	0.891832
Snx2	-0.103478	8.671	1.56611	0.210773	0.892539
Wdr19	-0.211907	2.95081	1.5667	0.210687	0.892539
Gm10451	-0.256835	2.11584	1.56798	0.2105	0.892539
Rnf19b	-0.155571	6.11901	1.56226	0.211335	0.893889
Fkrp	-0.102671	5.68796	1.55632	0.212206	0.895743
2310011J03Rik	-0.136303	5.7946	1.55872	0.211853	0.895743
Prmt7	-0.115528	5.9185	1.55295	0.212701	0.89594
Akt1s1	-0.128266	5.78218	1.55407	0.212536	0.89594
Eif1b	-0.127195	5.45499	1.54951	0.213208	0.897029
Pop7	-0.147612	4.30239	1.54983	0.21316	0.897029
BC004004	-0.126631	5.82096	1.53753	0.214986	0.899103
Rgl2	-0.132002	7.64253	1.53797	0.21492	0.899103
Rnmtl1	-0.194446	3.62603	1.53879	0.214797	0.899103
Ccdc71	-0.119834	5.66701	1.54017	0.214592	0.899103
H2afj	-0.183416	6.21257	1.54049	0.214545	0.899103
Atad3a	-0.121271	6.90049	1.54109	0.214456	0.899103
Psmb2	-0.124919	6.45246	1.54176	0.214356	0.899103
Pcif1	-0.0967458	7.11742	1.5428	0.214202	0.899103
Colgalt1	-0.0948204	7.99583	1.54319	0.214144	0.899103
Dok3	-0.217812	8.78327	1.54377	0.214057	0.899103
Gm10250	-0.404798	0.207471	1.53311	0.215646	0.901226
Socs5	-0.20078	5.19999	1.5325	0.215737	0.901291
Ffar3	-0.880638	-0.495242	1.53127	0.215922	0.901431
Ppdpf	-0.161335	6.82958	1.52841	0.216351	0.90227
Pithd1	-0.128565	5.54805	1.52733	0.216514	0.902634
Klc2	-0.129826	5.40934	1.52434	0.216964	0.90272
2210016L21Rik	-0.157949	5.63241	1.52472	0.216907	0.90272
Tpst1	-0.125687	5.53908	1.5263	0.216669	0.90272
Fcgr2b	-0.102563	7.29596	1.51976	0.217655	0.903278
Nhej1	-0.273544	2.39637	1.52009	0.217606	0.903278
Gm5134	-0.315802	1.3386	1.52032	0.217572	0.903278
Zfp513	-0.161205	6.08451	1.52105	0.217461	0.903278
Insl6	-0.533827	0.744568	1.51765	0.217975	0.903664
3110070M22Rik	-0.514236	-0.595864	1.51798	0.217926	0.903664
Tor4a	-0.130258	6.62114	1.51643	0.21816	0.903867
Fars2	-0.173056	4.11394	1.51137	0.21893	0.90466
Pim3	-0.152208	5.59428	1.49486	0.221464	0.904874
Shkbp1	-0.149443	5.9895	1.4949	0.221458	0.904874
Tango6	-0.145976	4.10888	1.49634	0.221236	0.904874
Ccdc61	-0.172412	4.81867	1.49706	0.221124	0.904874
Obfc1	-0.160147	4.04084	1.49778	0.221014	0.904874
Stk16	-0.121531	5.85708	1.49867	0.220877	0.904874
Taf5l	-0.127522	6.13468	1.49868	0.220875	0.904874
Capn10	-0.155631	4.09378	1.49914	0.220804	0.904874
Ier5l	-0.239953	3.52721	1.49995	0.220679	0.904874
Parp3	-0.190619	6.16217	1.50033	0.220621	0.904874
Srpk3	-0.179942	7.04739	1.50039	0.220612	0.904874
Ap3m2	-0.149957	4.86015	1.50303	0.220205	0.904874
Mapkapk5	-0.231252	2.60467	1.50812	0.219426	0.904874
Il10rb	-0.128434	6.07373	1.5085	0.219367	0.904874
Zfp58	-0.182091	2.92677	1.49336	0.221696	0.905136
Jmjd6	-0.113128	5.93462	1.49236	0.22185	0.905209
Mst1	-0.339182	2.18522	1.48318	0.223278	0.907846
Coq2	-0.1139	6.12584	1.48338	0.223246	0.907846
Crtc1	-0.104952	5.75318	1.48392	0.223162	0.907846
Mrpl38	-0.13265	5.82568	1.47933	0.223879	0.908479
Xbp1	-0.148634	7.14837	1.47703	0.224239	0.908724
Gm13051	-0.492636	0.226665	1.46518	0.226108	0.909785
Taf8	-0.103727	6.0589	1.46545	0.226066	0.909785
Efcab9	-0.458253	0.30908	1.46556	0.226047	0.909785
Chic1	-0.34508	2.05594	1.46589	0.225996	0.909785
Myof	-0.335665	4.38576	1.46737	0.225761	0.909785
Ms4a4a	-0.287779	3.55335	1.46809	0.225648	0.909785
Map4k1	-0.12142	8.77582	1.46856	0.225573	0.909785
Rnft2	-0.272104	0.914477	1.46997	0.22535	0.909785
Tomm40l	-0.174561	4.01324	1.47043	0.225278	0.909785
Slc8a1	-0.616719	0.776271	1.47093	0.225198	0.909785
Ralgds	-0.150931	5.17406	1.47172	0.225074	0.909785
Slc25a19	-0.164921	8.39942	1.47477	0.224595	0.909785
Klhl36	-0.164093	4.18043	1.46126	0.22673	0.910443
Rcl1	-0.132007	5.86114	1.46188	0.226631	0.910443
Ino80b	-0.193468	5.28372	1.46052	0.226847	0.910604
H2-M3	-0.151175	6.01458	1.45266	0.228102	0.911282
Kxd1	-0.133937	5.99823	1.45324	0.228008	0.911282
Hsd17b1	-0.482147	0.0874179	1.45452	0.227804	0.911282
Ruvbl1	-0.132064	6.32155	1.4552	0.227696	0.911282
Zer1	-0.111701	7.10562	1.45725	0.227369	0.911282
Dguok	-0.144562	5.54214	1.45846	0.227176	0.911282
Mllt6	-0.168651	8.54292	1.45154	0.228281	0.911439
Ginm1	-0.134362	4.55661	1.45087	0.228389	0.911564
1700037C18Rik	-0.1818	2.96756	1.44911	0.228671	0.912078
Zfp658	-0.394465	1.4026	1.44799	0.228851	0.91249
2510039O18Rik	-0.10511	6.67125	1.44502	0.229329	0.912507
Mrpl2	-0.144255	5.73469	1.44543	0.229262	0.912507
Tsen2	-0.171985	3.47382	1.44643	0.229101	0.912507
Mypop	-0.299237	1.58193	1.4465	0.22909	0.912507
Zfand2b	-0.153657	5.0683	1.41742	0.233829	0.912754
P2rx4	-0.1276	5.93546	1.41763	0.233794	0.912754
Ydjc	-0.181348	3.79521	1.41763	0.233793	0.912754
AA474408	-0.3769	0.413782	1.41813	0.233711	0.912754
Rpl12	-0.1388	10.6014	1.41833	0.233678	0.912754
Smdt1	-0.172345	5.77136	1.41854	0.233645	0.912754
Hdhd3	-0.342454	0.666239	1.41876	0.233608	0.912754
Hdac5	-0.126468	7.14308	1.41983	0.233432	0.912754
Pik3r2	-0.113444	5.81077	1.42057	0.23331	0.912754
Perm1	-0.289368	1.56666	1.4208	0.233271	0.912754
Akap13	-0.144307	8.54615	1.42105	0.23323	0.912754
Krt80	-1.04212	0.275116	1.42318	0.232881	0.912754
Tspan13	-0.11318	6.77821	1.42393	0.232758	0.912754
Mlycd	-0.141702	4.59881	1.42622	0.232383	0.912754
Ppp4c	-0.120555	7.46482	1.42628	0.232372	0.912754
Cdc42se1	-0.115336	7.99075	1.42653	0.232332	0.912754
Map2k6	-0.243681	2.74849	1.42735	0.232197	0.912754
Rps23	-0.155962	10.0007	1.42762	0.232154	0.912754
Gstk1	-0.272814	2.15752	1.42836	0.232032	0.912754
Tha1	-0.309813	2.51313	1.42838	0.232028	0.912754
Zbtb24	-0.1169	5.27201	1.42846	0.232016	0.912754
Ddx31	-0.126403	4.56725	1.42931	0.231877	0.912754
Gmip	-0.0968679	8.1778	1.43019	0.231734	0.912754
Rsrp1	-0.139138	9.41082	1.43146	0.231527	0.912754
Ly6a	-0.434093	7.41031	1.43306	0.231265	0.912754
2410131K14Rik	-0.123856	4.66331	1.43486	0.230973	0.912754
Slc35f6	-0.131112	4.98023	1.43766	0.230518	0.912754
Rpl34	-0.145846	9.59733	1.438	0.230463	0.912754
Ubap1	-0.110465	5.82266	1.43884	0.230327	0.912754
Zfp940	-0.167247	3.2095	1.44075	0.230018	0.912754
Zfp319	-0.119076	5.48841	1.44271	0.229701	0.912754
Prkab2	-0.181967	5.54915	1.41137	0.234829	0.912842
Ggh	-0.235462	3.04907	1.41177	0.234763	0.912842
Coq3	-0.178668	3.27836	1.41259	0.234627	0.912842
Atp6v1h	-0.110689	5.64406	1.41317	0.23453	0.912842
Med15	-0.0897797	6.71563	1.4137	0.234443	0.912842
Osbpl7	-0.104402	5.85054	1.41443	0.234323	0.912842
Gigyf1	-0.123647	8.20696	1.41477	0.234267	0.912842
Prkcd	-0.0968564	8.91006	1.41603	0.234058	0.912842
Sil1	-0.160643	4.14242	1.38348	0.23951	0.913055
Grap	-0.143777	8.57488	1.38429	0.239371	0.913055
Trappc5	-0.114565	6.20477	1.38558	0.239153	0.913055
Hivep2	-0.237075	6.90317	1.38684	0.23894	0.913055
Fance	-0.118025	4.95486	1.38721	0.238877	0.913055
Tmcc1	-0.131414	5.00701	1.38757	0.238817	0.913055
Hist1h4h	-0.461983	-0.631629	1.38959	0.238474	0.913055
Gbp2	-0.401995	4.27459	1.38981	0.238437	0.913055
Klrk1	-0.523738	1.00758	1.39032	0.238351	0.913055
1110004E09Rik	-0.192619	2.89115	1.39172	0.238114	0.913055
Fam214b	-0.177543	4.88922	1.39283	0.237928	0.913055
E130012A19Rik	-0.164335	4.36476	1.3932	0.237865	0.913055
Numb	-0.118328	4.96502	1.39376	0.23777	0.913055
Lfng	-0.152261	6.63137	1.39538	0.237499	0.913055
Ubxn1	-0.128639	6.87336	1.39564	0.237455	0.913055
Ube3b	-0.0814889	7.1624	1.39589	0.237413	0.913055
Trappc3	-0.120614	5.59443	1.396	0.237394	0.913055
1700029I15Rik	-0.389146	0.433135	1.39779	0.237094	0.913055
Bckdha	-0.162234	3.85412	1.39877	0.23693	0.913055
Timm22	-0.131147	4.82464	1.39883	0.236919	0.913055
Rps12-ps3	-0.192988	2.83769	1.40005	0.236715	0.913055
Boll	-0.476113	-0.274899	1.40031	0.236671	0.913055
Akr1b10	-0.191632	4.42172	1.40228	0.236342	0.913055
Irak3	-0.165543	4.95914	1.40314	0.236198	0.913055
Aurkaip1	-0.138128	6.07728	1.40351	0.236136	0.913055
Irf1	-0.214841	6.81851	1.40392	0.236068	0.913055
Bhlha15	-0.497725	1.1188	1.40822	0.235352	0.913055
Sys1	-0.157831	5.18601	1.40959	0.235124	0.913055
Gm14410	-0.267513	1.5166	1.41024	0.235016	0.913055
Ghdc	-0.147055	4.07732	1.38004	0.240094	0.913138
Spcs1	-0.134334	5.63785	1.38063	0.239994	0.913138
Ndufa1	-0.16476	4.85944	1.38103	0.239927	0.913138
Egr3	-0.206829	8.96179	1.38246	0.239682	0.913138
Rpl9	-0.138758	10.2646	1.37625	0.24074	0.913645
H2-D1	-0.157953	10.7132	1.37654	0.240691	0.913645
Bet1l	-0.136756	4.88066	1.37578	0.240822	0.913663
Ift52	-0.0968809	5.53753	1.36953	0.241893	0.914081
Exosc10	-0.0904601	7.11497	1.37075	0.241683	0.914081
Wdr55	-0.144363	5.49494	1.37089	0.241658	0.914081
Macrod1	-0.178284	3.89503	1.37104	0.241633	0.914081
Igkv4-69	-0.313996	2.44262	1.37266	0.241356	0.914081
Vapb	-0.0871161	6.06199	1.37443	0.241053	0.914081
Slc25a33	-0.194705	3.235	1.3686	0.242053	0.914253
Fbxw2	-0.0977387	6.35057	1.3677	0.242208	0.914547
Kcnmb3	-0.379775	0.187898	1.36704	0.242321	0.914682
Atp6ap1	-0.090184	7.64992	1.36623	0.24246	0.91486
Igj	-0.567805	7.75033	1.36348	0.242935	0.915549
Nudt18	-0.17877	4.22836	1.36249	0.243107	0.915905
AI837181	-0.139094	5.95906	1.36202	0.243189	0.915923
Phf11d	-0.525009	1.29624	1.35887	0.243733	0.916233
Lpcat2	-0.233856	3.6985	1.35514	0.244381	0.916352
Ssr4	-0.123367	6.82444	1.35588	0.244254	0.916352
Ankrd23	-0.323638	1.76444	1.35631	0.244178	0.916352
Gm12185	-0.597629	0.0692508	1.35818	0.243852	0.916352
Angel1	-0.159534	4.26978	1.35401	0.244578	0.916511
Bax	-0.161505	6.16336	1.35344	0.244677	0.916596
Fam78a	-0.167687	5.75623	1.34945	0.245375	0.916898
Gm12258	-0.25234	3.80216	1.34966	0.245337	0.916898
Prr7	-0.259993	3.05427	1.34982	0.24531	0.916898
Tssk6	-0.321399	1.42156	1.35078	0.245142	0.916898
Rdh14	-0.156606	3.97505	1.35115	0.245077	0.916898
Crk	-0.121922	6.58247	1.34534	0.246095	0.916981
Atp5e	-0.138292	7.21844	1.34581	0.246012	0.916981
Exosc4	-0.161274	4.8304	1.34672	0.245852	0.916981
Mrps7	-0.154071	6.3628	1.34207	0.24667	0.917212
Ccdc28a	-0.166901	4.1323	1.34247	0.246599	0.917212
Arsa	-0.146899	4.91183	1.34341	0.246433	0.917212
Pten	-0.117692	7.72777	1.33531	0.247863	0.917282
Fibp	-0.122783	5.8668	1.33566	0.247801	0.917282
Naa38	-0.190251	4.22606	1.33603	0.247735	0.917282
Srrd	-0.187843	3.54556	1.3365	0.247652	0.917282
2310003H01Rik	-0.118363	5.31009	1.33718	0.247532	0.917282
Rab37	-0.226315	2.86496	1.3397	0.247086	0.917282
Pip4k2c	-0.103264	6.6368	1.34029	0.246983	0.917282
Mycbp2	-0.208247	8.65685	1.33261	0.248341	0.917319
Lyz1	-0.801519	1.18759	1.33318	0.24824	0.917319
Rhpn2	-0.424057	0.0822575	1.33442	0.248021	0.917319
Mcfd2	-0.126715	4.77407	1.33169	0.248504	0.917638
Hscb	-0.155845	4.60104	1.33119	0.248594	0.917684
Bysl	-0.137121	5.61611	1.29677	0.254805	0.9181
Scrn2	-0.141339	4.11003	1.29711	0.254742	0.9181
Txndc15	-0.129058	4.47182	1.29714	0.254736	0.9181
Dennd1c	-0.14968	7.73781	1.29872	0.254447	0.9181
Fem1a	-0.132965	7.01281	1.29953	0.254298	0.9181
Gpi1	-0.080841	8.82528	1.30076	0.254075	0.9181
Ogfr	-0.166699	6.83779	1.30123	0.253988	0.9181
Ldhd	-0.392846	-0.188136	1.30123	0.253988	0.9181
Oas1c	-0.208614	3.8319	1.30275	0.253712	0.9181
Polr3h	-0.122851	5.24637	1.30286	0.253691	0.9181
BC029214	-0.170603	4.62281	1.30286	0.253691	0.9181
Ldoc1l	-0.129378	5.53338	1.30287	0.253689	0.9181
Manf	-0.182995	6.27128	1.30323	0.253625	0.9181
Pja1	-0.104734	5.45056	1.30356	0.253563	0.9181
Kcnj1	-0.35065	1.85818	1.30399	0.253485	0.9181
Nfkbib	-0.14436	6.11408	1.30413	0.253461	0.9181
Tmem108	-0.264424	3.09261	1.30426	0.253437	0.9181
Dcxr	-0.195935	3.41228	1.30538	0.253234	0.9181
Tmem222	-0.118912	5.16187	1.30538	0.253233	0.9181
BC094916	-0.29041	5.30829	1.30542	0.253226	0.9181
Gale	-0.172573	3.84338	1.30626	0.253072	0.9181
Cxcr3	-0.319611	1.39807	1.30634	0.253059	0.9181
Eva1b	-0.301383	2.23691	1.31045	0.252313	0.9181
Agpat9	-0.247343	3.59007	1.31189	0.252053	0.9181
1700030K09Rik	-0.135674	4.43463	1.31316	0.251824	0.9181
Hpdl	-0.29055	0.69352	1.31401	0.25167	0.9181
Sdhb	-0.139548	6.37995	1.31642	0.251235	0.9181
Tbc1d12	-0.272571	2.67027	1.31756	0.251031	0.9181
Rgs3	-0.149182	4.71772	1.31884	0.2508	0.9181
Serpinb7	-0.516845	0.85934	1.31922	0.250732	0.9181
Mif4gd	-0.126466	8.68935	1.31938	0.250702	0.9181
Rab22a	-0.0977619	5.87772	1.32034	0.250532	0.9181
Zfp668	-0.123597	4.84208	1.32047	0.250507	0.9181
Ost4	-0.132374	5.556	1.32132	0.250354	0.9181
Ciao1	-0.127739	5.50625	1.32192	0.250247	0.9181
Lzts2	-0.238731	3.39618	1.32221	0.250196	0.9181
Acpp	-0.596967	0.287421	1.3224	0.250162	0.9181
Psmb4	-0.13316	7.39332	1.32294	0.250066	0.9181
Eif6	-0.137052	6.82895	1.32371	0.249928	0.9181
Gtpbp2	-0.108106	7.71696	1.32685	0.249367	0.9181
Aph1c	-0.623927	0.0220255	1.32779	0.249199	0.9181
Dcps	-0.119329	5.62578	1.3279	0.24918	0.9181
Polr1b	-0.139948	6.57714	1.32989	0.248824	0.9181
Ccpg1os	-0.324674	1.14503	1.29095	0.255872	0.919156
Gbp4	-0.231125	5.51771	1.29102	0.25586	0.919156
Fam118a	-0.138764	4.04858	1.29139	0.255792	0.919156
Rundc3b	-0.279572	1.16227	1.29273	0.255546	0.919156
Spin2c	-0.377696	0.206182	1.29322	0.255456	0.919156
Pias4	-0.120558	6.28054	1.29354	0.255397	0.919156
Ndufs5	-0.154966	4.65456	1.29414	0.255286	0.919156
9430038I01Rik	-0.146034	3.71258	1.28143	0.257633	0.919284
Sirpb1c	-1.19412	-1.1143	1.28185	0.257555	0.919284
Vmac	-0.147187	4.13	1.2841	0.257138	0.919284
Eci1	-0.151665	5.20374	1.28504	0.256965	0.919284
Ahr	-0.218365	6.36346	1.28519	0.256936	0.919284
Cln5	-0.113701	5.72706	1.28561	0.256859	0.919284
Tpgs1	-0.166096	4.77726	1.28679	0.25664	0.919284
Nop16	-0.126453	5.98296	1.28698	0.256605	0.919284
Rft1	-0.126614	4.64835	1.28698	0.256604	0.919284
Lamtor4	-0.159856	5.01671	1.28876	0.256277	0.919284
Pfdn5	-0.147936	7.2924	1.28025	0.257852	0.919607
Fam71e1	-0.30155	1.99888	1.27904	0.258078	0.920137
Endov	-0.120169	5.38337	1.27653	0.258544	0.92059
Lifr	-0.652478	1.51312	1.27693	0.258471	0.92059
Ash2l	-0.0857573	6.15545	1.277	0.258457	0.92059
Siglecg	-0.171845	9.03385	1.2736	0.259093	0.92072
Slc25a27	-0.27107	2.65484	1.27383	0.259048	0.92072
Fam58b	-0.157931	4.32384	1.27224	0.259348	0.920801
Eif3b	-0.097037	8.49609	1.26982	0.2598	0.920825
Gm10037	-0.418376	0.269393	1.2702	0.259729	0.920825
Drap1	-0.147231	6.73795	1.27032	0.259706	0.920825
Csnk1g2	-0.131739	7.92801	1.26926	0.259906	0.920859
Psmb3	-0.130199	6.95401	1.2676	0.260217	0.921001
2021-03-03	-0.20116	3.27668	1.26572	0.260571	0.921294
Cs	-0.0751008	7.96043	1.26576	0.260564	0.921294
Pycr2	-0.131666	5.65526	1.26632	0.260458	0.921294
Peg10	-0.651758	-0.315122	1.24876	0.263789	0.921915
Ly9	-0.0986526	7.64306	1.24909	0.263727	0.921915
Trim26	-0.101855	7.47392	1.24913	0.26372	0.921915
Tut1	-0.111397	6.27738	1.24952	0.263645	0.921915
Tfip11	-0.0872055	6.24625	1.24984	0.263583	0.921915
Sap30l	-0.167097	4.57723	1.25083	0.263395	0.921915
Hmga1-rs1	-0.280943	0.685253	1.25196	0.263178	0.921915
Pecam1	-0.16874	7.46083	1.2525	0.263076	0.921915
Mpnd	-0.128563	6.17092	1.25286	0.263007	0.921915
Rassf5	-0.109016	7.08272	1.25287	0.263006	0.921915
Wdr4	-0.0979191	5.88571	1.25422	0.262749	0.921915
Dgcr14	-0.116732	5.56828	1.25593	0.262422	0.921915
Hemk1	-0.145076	4.18782	1.25647	0.26232	0.921915
Mrps12	-0.136329	4.75094	1.25668	0.26228	0.921915
Myl12b	-0.221406	2.8801	1.25692	0.262235	0.921915
Surf1	-0.14479	5.26462	1.25717	0.262188	0.921915
Unc93b1	-0.116792	9.74987	1.25721	0.262179	0.921915
Zfp97	-0.183124	2.9358	1.25955	0.261736	0.921915
Prkab1	-0.0967315	5.66331	1.25963	0.26172	0.921915
Atp13a1	-0.0804661	7.51923	1.26263	0.261153	0.921915
Syap1	-0.107254	5.24307	1.23067	0.267277	0.921937
Trpc4ap	-0.0686142	7.68955	1.2308	0.267251	0.921937
Cxxc5	-0.118676	6.82231	1.23107	0.267199	0.921937
Polk	-0.158277	4.05217	1.23143	0.267129	0.921937
Gnptg	-0.133105	5.01689	1.23258	0.266906	0.921937
Crlf3	-0.104376	7.71724	1.23298	0.266828	0.921937
Cmss1	-0.170088	3.51119	1.2339	0.26665	0.921937
Ccr5	-0.278224	3.918	1.23408	0.266615	0.921937
Fam101b	-0.269025	5.56722	1.23485	0.266466	0.921937
Rab1b	-0.113858	7.0877	1.23516	0.266407	0.921937
Gpr108	-0.124063	6.30737	1.23525	0.266388	0.921937
Lpar2	-0.124967	5.51663	1.23581	0.266279	0.921937
Ncoa3	-0.107768	8.06594	1.23659	0.266129	0.921937
Ist1	-0.0870185	7.21291	1.23705	0.26604	0.921937
Dynlrb1	-0.141466	5.78441	1.23817	0.265823	0.921937
Nek9	-0.127123	7.5976	1.23848	0.265764	0.921937
Emg1	-0.10037	6.95165	1.2393	0.265606	0.921937
Jtb	-0.12195	6.13037	1.23966	0.265536	0.921937
Rgs19	-0.0965069	7.00112	1.24008	0.265456	0.921937
Calr3	-0.410629	-0.246426	1.2401	0.265452	0.921937
Dcaf15	-0.126369	6.54714	1.24206	0.265075	0.921937
Setmar	-0.259013	1.67779	1.24289	0.264915	0.921937
Ube2g2	-0.102658	5.50583	1.24359	0.264781	0.921937
Apoa1bp	-0.155985	5.20116	1.24501	0.264508	0.921937
Arfgap3	-0.152425	4.12642	1.22703	0.267985	0.921979
Sh3yl1	-0.281871	1.06611	1.22728	0.267937	0.921979
Spo11	-0.326637	1.75266	1.22739	0.267916	0.921979
2610008E11Rik	-0.130977	4.78654	1.22749	0.267895	0.921979
Zbtb5	-0.114028	5.35307	1.22968	0.267469	0.921979
Exd2	-0.122447	5.06955	1.19844	0.273634	0.921985
Slc46a1	-0.303896	0.580397	1.19868	0.273585	0.921985
Urm1	-0.142927	5.19012	1.19905	0.273511	0.921985
Fam219b	-0.135538	4.79049	1.20077	0.273168	0.921985
Poll	-0.11794	4.81435	1.20092	0.273137	0.921985
Med31	-0.192105	3.03307	1.20166	0.27299	0.921985
Myo1e	-0.117498	8.03731	1.20172	0.272978	0.921985
Fan1	-0.183272	3.70699	1.20262	0.272799	0.921985
Aire	-0.344932	-0.0523868	1.20382	0.27256	0.921985
Cnn2	-0.129825	8.617	1.20398	0.272527	0.921985
Gzma	-0.687501	0.63101	1.20489	0.272347	0.921985
Psmb10	-0.181511	6.19061	1.20489	0.272346	0.921985
Rpl30	-0.154069	9.51306	1.20684	0.271959	0.921985
Zfp622	-0.109883	6.54687	1.20739	0.27185	0.921985
Ctsz	-0.134096	8.21663	1.20824	0.271681	0.921985
Fig4	-0.112142	5.91145	1.20847	0.271635	0.921985
Traf3ip2	-0.113242	5.16275	1.21194	0.270948	0.921985
Mcat	-0.126802	4.85788	1.21231	0.270876	0.921985
2021-09-01	-0.11872	8.10926	1.21238	0.270862	0.921985
Crtap	-0.155597	3.92078	1.21345	0.27065	0.921985
4930432K21Rik	-0.222418	1.75691	1.21409	0.270524	0.921985
Fmnl1	-0.0941731	8.92538	1.21509	0.270327	0.921985
Il27ra	-0.108517	6.40644	1.21603	0.270141	0.921985
Plekha6	-0.410382	0.657481	1.21626	0.270096	0.921985
Tbc1d22a	-0.112195	5.46511	1.21697	0.269957	0.921985
Kcnh4	-0.195571	3.36	1.21726	0.269899	0.921985
Grin2d	-0.458597	-0.360356	1.21904	0.269548	0.921985
Card14	-0.862196	-0.414547	1.21958	0.269443	0.921985
Pmvk	-0.137107	5.05905	1.21972	0.269416	0.921985
Trpv2	-0.113489	6.52346	1.22028	0.269305	0.921985
Grpel1	-0.143763	5.80477	1.22283	0.268806	0.921985
Ppapdc3	-0.461906	-0.688253	1.22479	0.268423	0.921985
Cdpf1	-0.164086	4.12007	1.19732	0.273857	0.922349
Hspbp1	-0.145495	5.88281	1.19464	0.274396	0.923245
Cmtm6	-0.105103	7.67974	1.19029	0.275271	0.92344
Abhd2	-0.115421	6.32672	1.19061	0.275207	0.92344
Habp4	-0.145251	4.79956	1.1914	0.275048	0.92344
Ell3	-0.308342	1.10994	1.19327	0.274671	0.92344
Sash3	-0.0930889	8.338	1.18744	0.275847	0.923854
Acot9	-0.123121	5.29107	1.18771	0.275793	0.923854
Tor2a	-0.137009	5.24711	1.18771	0.275791	0.923854
Zmynd15	-0.402857	2.45671	1.18834	0.275665	0.923854
Hsf4	-0.535551	-0.0209421	1.18264	0.27682	0.924599
Emid1	-0.21419	3.85092	1.18318	0.276709	0.924599
Nipsnap3b	-0.105771	5.38169	1.18204	0.276941	0.924742
Ipcef1	-0.172888	4.5306	1.17922	0.277514	0.925358
Slc25a15	-0.133808	4.47113	1.17924	0.277511	0.925358
Tbcb	-0.13798	5.36524	1.17927	0.277505	0.925358
Spa17	-0.481843	0.0303958	1.17773	0.277819	0.925855
BC003965	-0.102853	5.11283	1.17556	0.278262	0.927071
Banf1	-0.142002	6.86482	1.17251	0.278886	0.927212
Bcs1l	-0.128356	4.31115	1.17297	0.278792	0.927212
Dhx30	-0.0764394	7.06768	1.17388	0.278604	0.927212
Arpc4	-0.101931	7.64158	1.17395	0.278592	0.927212
Zfp865	-0.114052	6.2892	1.17396	0.27859	0.927212
Cxxc1	-0.0918342	7.34761	1.17149	0.279094	0.927507
Fuz	-0.132562	4.95463	1.16938	0.279529	0.927656
Abhd14b	-0.21667	3.14009	1.1694	0.279524	0.927656
Cdcp1	-0.572761	0.267428	1.16982	0.279438	0.927656
Armc2	-0.433526	-0.318251	1.16658	0.280105	0.928532
Heatr2	-0.146717	4.97007	1.1621	0.28103	0.929524
2310039H08Rik	-0.151702	3.28579	1.16239	0.280969	0.929524
Stub1	-0.122981	5.55786	1.16074	0.281312	0.930199
Hyou1	-0.0868838	7.76169	1.11649	0.290676	0.930236
Puf60	-0.0934629	7.58188	1.1166	0.290651	0.930236
Prmt2	-0.159846	3.8024	1.11679	0.29061	0.930236
Slc16a4	-0.389061	0.975938	1.11682	0.290604	0.930236
Gprc5a	-0.264886	1.56435	1.11723	0.290516	0.930236
Hmox2	-0.129918	5.52814	1.11951	0.290023	0.930236
Stkld1	-0.328076	0.69755	1.11952	0.290022	0.930236
Napa	-0.0979602	7.3406	1.12009	0.289899	0.930236
Mrpl17	-0.11335	5.52982	1.12056	0.289799	0.930236
Cln3	-0.15295	4.99523	1.12075	0.289758	0.930236
Zdhhc4	-0.109585	5.479	1.12081	0.289743	0.930236
Thap11	-0.118973	4.9819	1.12105	0.289691	0.930236
Lysmd1	-0.168429	3.33053	1.1213	0.289638	0.930236
1110008F13Rik	-0.162871	4.72914	1.12147	0.289602	0.930236
Wdfy1	-0.19407	5.62785	1.12158	0.289579	0.930236
Prosc	-0.100021	6.07955	1.12187	0.289517	0.930236
Grwd1	-0.124216	5.96496	1.12202	0.289484	0.930236
Fam167a	-0.165186	6.5232	1.123	0.289273	0.930236
Pglyrp2	-0.175004	3.5072	1.12525	0.28879	0.930236
Timm23	-0.0977136	6.04268	1.12623	0.288581	0.930236
Ccdc90b	-0.161362	3.54235	1.12625	0.288577	0.930236
Ei24	-0.0903205	5.98292	1.12951	0.28788	0.930236
Gm16253	-0.603138	-0.677223	1.12977	0.287824	0.930236
Tagln	-0.413709	-0.144385	1.13072	0.287622	0.930236
Pctp	-0.137779	3.52797	1.13125	0.287508	0.930236
Dyrk1b	-0.188665	4.42209	1.13208	0.287331	0.930236
Mast1	-0.304318	2.83184	1.13245	0.287254	0.930236
Tlr4	-0.177215	3.74869	1.13273	0.287195	0.930236
Mllt11	-0.122791	4.37817	1.13296	0.287145	0.930236
Ubc	-0.150753	4.89162	1.13371	0.286985	0.930236
Gmppb	-0.156629	4.76402	1.1339	0.286945	0.930236
Lrrc42	-0.125584	4.764	1.13414	0.286894	0.930236
E4f1	-0.0886742	5.921	1.13422	0.286877	0.930236
Ppp1r10	-0.0713429	6.70361	1.13525	0.286657	0.930236
Iscu	-0.116909	5.72291	1.1353	0.286647	0.930236
Creld2	-0.143521	5.62354	1.13548	0.286609	0.930236
Cbx8	-0.155092	3.8121	1.13638	0.286418	0.930236
Kcnk13	-0.522984	0.531481	1.13719	0.286247	0.930236
Neurl4	-0.0891977	7.0897	1.13789	0.286098	0.930236
Zfp746	-0.0854651	5.98654	1.13791	0.286095	0.930236
Mettl1	-0.138814	5.64767	1.1392	0.285822	0.930236
9330151L19Rik	-0.215687	3.12158	1.14032	0.285585	0.930236
Gm561	-0.230683	2.13679	1.14047	0.285553	0.930236
Erp27	-0.308011	2.37305	1.14294	0.285033	0.930236
Srf	-0.10323	6.62945	1.14348	0.284918	0.930236
Dnajb5	-0.115446	4.92833	1.1439	0.284831	0.930236
1110059E24Rik	-0.137223	5.65465	1.14439	0.284726	0.930236
Tmem173	-0.11446	6.9317	1.14615	0.284356	0.930236
Ttll13	-0.50177	-0.481535	1.14661	0.28426	0.930236
Rab19	-0.204446	3.57052	1.14895	0.28377	0.930236
Uba7	-0.160544	7.4102	1.14938	0.283679	0.930236
Chac1	-0.221699	3.04859	1.14938	0.283678	0.930236
3110062M04Rik	-0.190817	3.5389	1.14968	0.283617	0.930236
Dph7	-0.112148	4.60385	1.14983	0.283585	0.930236
Bbs12	-0.163544	3.00588	1.15182	0.283169	0.930236
Dus3l	-0.0960088	7.02142	1.15402	0.282709	0.930236
Asb6	-0.105968	5.6483	1.15475	0.282558	0.930236
Rrp9	-0.134212	6.0849	1.15514	0.282476	0.930236
Dlgap4	-0.0899404	6.31034	1.15959	0.28155	0.930236
B3gnt8	-0.196994	5.63871	1.11327	0.291372	0.930858
Pex14	-0.145351	3.94751	1.11333	0.291359	0.930858
B3gnt2	-0.224281	3.79764	1.11352	0.291317	0.930858
Spg21	-0.0942133	6.43963	1.11358	0.291305	0.930858
Prdx6	-0.115125	6.28468	1.11434	0.291141	0.930858
Gla	-0.212483	3.22117	1.11286	0.291462	0.930893
Dhx32	-0.11959	4.86075	1.11103	0.291859	0.931075
Rbks	-0.191848	2.90108	1.11148	0.29176	0.931075
Sytl1	-0.424423	0.66912	1.10339	0.293523	0.931575
Rps26	-0.106995	10.0657	1.10358	0.293482	0.931575
Fez2	-0.139139	3.42208	1.10379	0.293435	0.931575
Tcf25	-0.0638562	8.93827	1.10554	0.293054	0.931575
Ctnnbl1	-0.107431	5.87247	1.10595	0.292964	0.931575
Emc9	-0.153368	3.03987	1.10609	0.292934	0.931575
Gpd2	-0.175086	5.83074	1.10766	0.292592	0.931575
Ten1	-0.143682	4.80995	1.10182	0.293868	0.931688
Ttc7	-0.0870403	7.55997	1.10189	0.293852	0.931688
Acadm	-0.0954574	5.86884	1.10013	0.294238	0.932064
Eif3g	-0.129654	7.16287	1.09541	0.295275	0.932655
Gatsl2	-0.206694	4.07025	1.0964	0.295058	0.932655
Cd247	-0.614196	-0.907451	1.09665	0.295002	0.932655
Prune	-0.123945	4.65199	1.09668	0.294996	0.932655
Anapc2	-0.0886825	7.07437	1.09714	0.294894	0.932655
Ict1	-0.148109	4.79147	1.09436	0.295508	0.933044
Snap29	-0.0983556	6.63524	1.09395	0.295598	0.933078
Zbtb22	-0.111622	6.02275	1.09304	0.295798	0.933214
Slc22a5	-0.123243	4.14285	1.09329	0.295743	0.933214
Rpl22	-0.126839	8.76434	1.09195	0.29604	0.933289
Mat2b	-0.106002	6.67108	1.09228	0.295967	0.933289
Tmem231	-0.267307	1.19006	1.08609	0.297339	0.935222
Dnm2	-0.0818804	7.98851	1.08636	0.29728	0.935222
Ptges2	-0.146984	4.26257	1.08249	0.298142	0.935648
Crls1	-0.113301	4.41244	1.08281	0.29807	0.935648
Uqcc3	-0.1581	4.63808	1.08457	0.297677	0.935648
D930048N14Rik	-0.195084	3.65016	1.0795	0.298809	0.936503
Ndufaf3	-0.170851	4.08418	1.07968	0.29877	0.936503
Tlr6	-0.178928	3.18911	1.07989	0.298722	0.936503
Zfp637	-0.156586	3.5125	1.07782	0.299185	0.936943
Pycrl	-0.120925	5.0922	1.07794	0.299158	0.936943
Erlin2	-0.120979	5.71353	1.06546	0.301972	0.937525
Grk6	-0.0796117	8.72504	1.06564	0.301933	0.937525
Epm2a	-0.582103	-0.674066	1.06576	0.301905	0.937525
Tmco6	-0.10282	5.53046	1.06657	0.301721	0.937525
Ly6e	-0.121627	10.9152	1.06695	0.301636	0.937525
Ostc	-0.105439	6.16898	1.06774	0.301455	0.937525
Pcgf1	-0.187185	3.45663	1.06943	0.301074	0.937525
Sirt7	-0.0964264	7.27589	1.06981	0.300989	0.937525
Ccdc176	-0.372573	0.690038	1.06991	0.300966	0.937525
Ubxn11	-0.131583	4.92474	1.07023	0.300894	0.937525
Olfr98	-0.594154	0.0683722	1.07182	0.300535	0.937525
Triap1	-0.10723	4.59204	1.07208	0.300477	0.937525
Bcl2	-0.156754	6.53627	1.07225	0.300437	0.937525
Ngrn	-0.110732	5.07983	1.07238	0.300408	0.937525
Acbd6	-0.143058	5.56859	1.07399	0.300046	0.937525
Fam149b	-0.12772	6.20159	1.07629	0.29953	0.937525
Ifnlr1	-0.180403	3.42328	1.06439	0.302217	0.93804
Tnfrsf13c	-0.0971885	8.8685	1.04304	0.307115	0.938307
Myadml2	-0.614134	-0.497585	1.04332	0.307049	0.938307
Ecd	-0.0805407	6.43571	1.04372	0.306958	0.938307
Ppp1r9b	-0.105949	7.31487	1.04385	0.306927	0.938307
Cnbp	-0.096209	9.10132	1.04434	0.306815	0.938307
Bmp2k	-0.113232	6.83294	1.04486	0.306694	0.938307
Edc4	-0.0786802	7.15661	1.04493	0.306678	0.938307
Cyb561d2	-0.128873	4.17943	1.0451	0.306638	0.938307
Bud13	-0.106764	5.01453	1.04559	0.306525	0.938307
Rexo4	-0.0817649	6.34624	1.04663	0.306286	0.938307
Snapin	-0.100364	5.74765	1.04818	0.305927	0.938307
Ovca2	-0.162552	2.98084	1.04883	0.305777	0.938307
Gnb5	-0.455425	-0.685438	1.04917	0.305699	0.938307
Sin3b	-0.0809391	6.85393	1.04932	0.305663	0.938307
Cib1	-0.162199	5.50165	1.0497	0.305577	0.938307
Shc1	-0.073521	6.8324	1.05041	0.305413	0.938307
Pirb	-0.22364	5.92897	1.05252	0.304928	0.938307
Trib2	-0.131676	6.24142	1.05258	0.304913	0.938307
Nubpl	-0.162272	3.26809	1.05348	0.304707	0.938307
Bbs9	-0.172691	4.0347	1.05415	0.304552	0.938307
6430550D23Rik	-0.300442	0.995871	1.05446	0.304482	0.938307
Sympk	-0.0786876	7.7643	1.0546	0.30445	0.938307
Jkamp	-0.157836	4.41538	1.05565	0.304209	0.938307
Rps14	-0.133775	10.2718	1.05683	0.30394	0.938307
Ing2	-0.129946	4.17518	1.05686	0.303933	0.938307
Cml1	-0.249019	1.72982	1.0599	0.303238	0.938307
Ndufs8	-0.122836	6.32438	1.0615	0.302872	0.938307
Jagn1	-0.115495	4.60951	1.06333	0.302457	0.938307
Prpf40b	-0.183973	4.48194	1.03991	0.307843	0.9394
Fgd2	-0.154421	6.79867	1.03999	0.307824	0.9394
Atg2a	-0.089009	6.6416	1.03909	0.308034	0.939665
Aptx	-0.101184	4.59601	1.03718	0.308478	0.93973
Ddx60	-0.395128	2.7379	1.03743	0.30842	0.93973
Uros	-0.132139	4.31624	1.0355	0.30887	0.939806
Mon1a	-0.124787	4.59472	1.03582	0.308796	0.939806
Mthfsd	-0.112488	5.46261	1.03428	0.309156	0.940195
Hnrnpa0	-0.115854	9.08463	1.03325	0.309397	0.940446
Poldip2	-0.0971739	5.76008	1.0334	0.309361	0.940446
Myc	-0.12297	7.595	0.991383	0.319404	0.940985
Gm10767	-0.236679	1.41681	0.991969	0.319262	0.940985
Atxn7l3	-0.0747341	7.3818	0.99229	0.319183	0.940985
4930522L14Rik	-1.39165	2.01976	0.992296	0.319182	0.940985
Glrx2	-0.10246	4.99769	0.992427	0.31915	0.940985
Rnh1	-0.100378	7.11047	0.993353	0.318924	0.940985
Saa3	-0.997788	-0.0571129	0.993842	0.318805	0.940985
2310047M10Rik	-0.145595	4.09624	0.994943	0.318537	0.940985
Klhl24	-0.130653	8.34076	0.995494	0.318403	0.940985
Mfsd3	-0.155071	2.99714	0.995783	0.318333	0.940985
Fpgs	-0.125948	5.23159	0.996423	0.318178	0.940985
Tmem261	-0.116861	5.16987	0.996498	0.318159	0.940985
Cox11	-0.162685	3.27756	0.996787	0.318089	0.940985
Sirt2	-0.108196	6.46366	0.997884	0.317823	0.940985
Aldoc	-0.283823	4.92	0.998948	0.317565	0.940985
Nfkbid	-0.151749	7.86532	0.99978	0.317364	0.940985
Gramd1a	-0.0911181	8.55554	0.999803	0.317358	0.940985
Arhgap31	-0.205483	3.94029	0.999888	0.317338	0.940985
Wbp1l	-0.0734616	6.68509	1.00058	0.317169	0.940985
Pex3	-0.12122	4.14236	1.00212	0.316797	0.940985
Paip2	-0.0917541	7.3512	1.00238	0.316736	0.940985
Pea15a	-0.136846	4.53755	1.00281	0.316631	0.940985
Insl3	-0.169715	2.77045	1.00304	0.316577	0.940985
Apol10b	-0.532439	-0.71582	1.00315	0.31655	0.940985
[truncated: 3,924 more rows]

## Sheet: WT_Both_vs_KO_Both_lo_q05genes
Icosl
[truncated: 22 more rows]
