# Supplementary material for: Orai3 and Orai1 mediate CRAC channel function and metabolic reprogramming in B cells
Source: eLife. 2023 Feb 21;12:e84708. doi: 10.7554/eLife.84708 (PMC9998091; doi:10.7554/eLife.84708)
Supplement: Source data 4. [file elife-84708-data4.xlsx]

## Sheet: WT_IgM_vs_KO_IgM_REACTOME_pos
NAME	GS DETAILS	SIZE	ES	NES	NOM p-val	FDR q-val	FWER p-val	RANK AT MAX	LEADING EDGE
REACTOME_CELL_CYCLE_MITOTIC	Details ...	448	0.286162	6.87983	0	0	0	4598	tags=72%, list=44%, signal=124%
REACTOME_M_PHASE	Details ...	317	0.269911	5.65882	0	0	0	4598	tags=71%, list=44%, signal=123%
REACTOME_MITOTIC_PROMETAPHASE	Details ...	181	0.349038	5.47841	0	0	0	3992	tags=73%, list=39%, signal=117%
REACTOME_DNA_STRAND_ELONGATION	Details ...	30	0.790102	5.1526	0	0	0	814	tags=87%, list=8%, signal=94%
REACTOME_CELL_CYCLE_CHECKPOINTS	Details ...	239	0.285665	5.14909	0	0	0	4077	tags=67%, list=39%, signal=109%
REACTOME_MITOTIC_G2_G2_M_PHASES	Details ...	176	0.317154	4.91385	0	0	0	4587	tags=76%, list=44%, signal=134%
REACTOME_RESOLUTION_OF_SISTER_CHROMATID_COHESION	Details ...	109	0.382855	4.66564	0	0	0	2247	tags=60%, list=22%, signal=75%
REACTOME_SEPARATION_OF_SISTER_CHROMATIDS	Details ...	168	0.304292	4.61676	0	0	0	4595	tags=74%, list=44%, signal=132%
REACTOME_MITOTIC_METAPHASE_AND_ANAPHASE	Details ...	207	0.277221	4.5461	0	0	0	4980	tags=75%, list=48%, signal=143%
REACTOME_MITOTIC_SPINDLE_CHECKPOINT	Details ...	103	0.367736	4.28931	0	0	0	1454	tags=50%, list=14%, signal=58%
REACTOME_ACTIVATION_OF_THE_PRE_REPLICATIVE_COMPLEX	Details ...	32	0.655944	4.25642	0	0	0	1638	tags=81%, list=16%, signal=96%
REACTOME_DNA_REPLICATION	Details ...	118	0.333778	4.23961	0	0	0	4559	tags=77%, list=44%, signal=136%
REACTOME_S_PHASE	Details ...	151	0.287982	4.14601	0	0	0	4595	tags=73%, list=44%, signal=129%
REACTOME_MITOTIC_G1_PHASE_AND_G1_S_TRANSITION	Details ...	139	0.296583	4.11975	0	0	0	4559	tags=73%, list=44%, signal=130%
REACTOME_CHROMOSOME_MAINTENANCE	Details ...	81	0.392551	4.10969	0	0	0	2481	tags=63%, list=24%, signal=82%
REACTOME_RHO_GTPASES_ACTIVATE_FORMINS	Details ...	117	0.317251	4.07889	0	0	0	2234	tags=53%, list=22%, signal=67%
REACTOME_ACTIVATION_OF_ATR_IN_RESPONSE_TO_REPLICATION_STRESS	Details ...	36	0.569772	4.07112	0	0	0	1308	tags=69%, list=13%, signal=79%
REACTOME_LAGGING_STRAND_SYNTHESIS	Details ...	18	0.789361	4.05778	0	0	0	1616	tags=94%, list=16%, signal=112%
REACTOME_RECRUITMENT_OF_NUMA_TO_MITOTIC_CENTROSOMES	Details ...	82	0.376129	4.01493	0	0	0	4587	tags=82%, list=44%, signal=146%
REACTOME_AURKA_ACTIVATION_BY_TPX2	Details ...	70	0.401649	3.9821	0	0	0	4587	tags=84%, list=44%, signal=151%
REACTOME_TELOMERE_C_STRAND_LAGGING_STRAND_SYNTHESIS		30	0.594905	3.94484	0	0	0	1792	tags=77%, list=17%, signal=92%
REACTOME_HDR_THROUGH_HOMOLOGOUS_RECOMBINATION_HRR		60	0.430316	3.86927	0	0	0	2123	tags=63%, list=21%, signal=79%
REACTOME_RECRUITMENT_OF_MITOTIC_CENTROSOME_PROTEINS_AND_COMPLEXES		75	0.372105	3.85148	0	0	0	4587	tags=81%, list=44%, signal=145%
REACTOME_REGULATION_OF_PLK1_ACTIVITY_AT_G2_M_TRANSITION		83	0.354096	3.7764	0	0	0	4587	tags=80%, list=44%, signal=142%
REACTOME_HOMOLOGY_DIRECTED_REPAIR		91	0.335904	3.76251	0	0	0	2123	tags=54%, list=21%, signal=67%
REACTOME_ANCHORING_OF_THE_BASAL_BODY_TO_THE_PLASMA_MEMBRANE		92	0.330755	3.74377	0	0	0	4587	tags=77%, list=44%, signal=138%
REACTOME_G1_S_SPECIFIC_TRANSCRIPTION		26	0.612184	3.7284	0	0	0	1638	tags=77%, list=16%, signal=91%
REACTOME_DNA_DOUBLE_STRAND_BREAK_REPAIR		118	0.280816	3.58268	0	0	0	3436	tags=61%, list=33%, signal=90%
REACTOME_G2_M_CHECKPOINTS		126	0.267913	3.54587	0	0	0	4564	tags=71%, list=44%, signal=125%
REACTOME_HOMOLOGOUS_DNA_PAIRING_AND_STRAND_EXCHANGE		41	0.458024	3.45084	0	0	0	1838	tags=63%, list=18%, signal=77%
REACTOME_DNA_REPLICATION_PRE_INITIATION		80	0.324354	3.38537	0	0	0	4424	tags=75%, list=43%, signal=130%
REACTOME_PCNA_DEPENDENT_LONG_PATCH_BASE_EXCISION_REPAIR		19	0.634181	3.35576	0	0	0	1616	tags=79%, list=16%, signal=93%
REACTOME_RHO_GTPASE_EFFECTORS		222	0.192646	3.32863	0	0	0	1263	tags=31%, list=12%, signal=35%
REACTOME_DEPOSITION_OF_NEW_CENPA_CONTAINING_NUCLEOSOMES_AT_THE_CENTROMERE		24	0.576751	3.27336	0	0	0	2234	tags=79%, list=22%, signal=101%
REACTOME_EXTENSION_OF_TELOMERES		45	0.411824	3.22831	0	0	0	814	tags=49%, list=8%, signal=53%
REACTOME_THE_ROLE_OF_GTSE1_IN_G2_M_PROGRESSION_AFTER_G2_CHECKPOINT		66	0.333639	3.18407	0	0	0	4559	tags=77%, list=44%, signal=137%
REACTOME_POLYMERASE_SWITCHING_ON_THE_C_STRAND_OF_THE_TELOMERE		22	0.558695	3.14839	0	0	0	814	tags=64%, list=8%, signal=69%
REACTOME_HEMOSTASIS		396	0.134178	3.04799	0	0	0	3859	tags=50%, list=37%, signal=77%
REACTOME_PROCESSING_OF_DNA_DOUBLE_STRAND_BREAK_ENDS		56	0.34177	3.01406	0	0	0	1838	tags=52%, list=18%, signal=63%
REACTOME_RESOLUTION_OF_D_LOOP_STRUCTURES		31	0.451682	3.00254	0	0	0	2346	tags=68%, list=23%, signal=87%
REACTOME_APC_C_MEDIATED_DEGRADATION_OF_CELL_CYCLE_PROTEINS		80	0.290395	2.99395	0	0	0	5289	tags=80%, list=51%, signal=163%
REACTOME_G0_AND_EARLY_G1		25	0.496547	2.98175	0	0	0	1494	tags=64%, list=14%, signal=75%
REACTOME_PROCESSING_OF_CAPPED_INTRON_CONTAINING_PRE_MRNA		214	0.17458	2.9308	0	0	0	4945	tags=65%, list=48%, signal=122%
REACTOME_RESOLUTION_OF_D_LOOP_STRUCTURES_THROUGH_SYNTHESIS_DEPENDENT_STRAND_ANNEALING_SDSA		25	0.494103	2.93001	0	0	0	2346	tags=72%, list=23%, signal=93%
REACTOME_GAP_FILLING_DNA_REPAIR_SYNTHESIS_AND_LIGATION_IN_GG_NER		22	0.520424	2.90562	0	2.67215e-05	0.001	2618	tags=77%, list=25%, signal=103%
REACTOME_G2_M_DNA_DAMAGE_CHECKPOINT		57	0.332668	2.88833	0	2.61406e-05	0.001	1838	tags=51%, list=18%, signal=62%
REACTOME_SWITCHING_OF_ORIGINS_TO_A_POST_REPLICATIVE_STATE		84	0.276106	2.88665	0	2.55845e-05	0.001	5289	tags=79%, list=51%, signal=160%
REACTOME_TELOMERE_MAINTENANCE		58	0.313328	2.86619	0	4.86464e-05	0.002	2481	tags=55%, list=24%, signal=72%
REACTOME_CILIUM_ASSEMBLY		168	0.190076	2.84964	0	9.63521e-05	0.004	6679	tags=83%, list=65%, signal=232%
REACTOME_RESOLUTION_OF_AP_SITES_VIA_THE_MULTIPLE_NUCLEOTIDE_PATCH_REPLACEMENT_PATHWAY		22	0.52648	2.8431	0	0.000117129	0.005	1616	tags=68%, list=16%, signal=81%
REACTOME_KINESINS		42	0.369065	2.84046	0	0.000114832	0.005	2352	tags=60%, list=23%, signal=77%
REACTOME_MITOCHONDRIAL_TRANSLATION		90	0.255669	2.84004	0	0.000112624	0.005	6796	tags=91%, list=66%, signal=264%
REACTOME_MEIOTIC_RECOMBINATION		23	0.49123	2.82389	0	0.000110499	0.005	2123	tags=70%, list=21%, signal=87%
REACTOME_AGGREPHAGY		29	0.443635	2.81872	0	0.000108453	0.005	3980	tags=83%, list=39%, signal=134%
REACTOME_MEIOSIS		48	0.346596	2.78227	0	0.00025584	0.012	2247	tags=56%, list=22%, signal=72%
REACTOME_EXTRACELLULAR_MATRIX_ORGANIZATION		129	0.210011	2.77677	0	0.000295071	0.014	3624	tags=56%, list=35%, signal=85%
REACTOME_APC_C_CDH1_MEDIATED_DEGRADATION_OF_CDC20_AND_OTHER_APC_C_CDH1_TARGETED_PROTEINS_IN_LATE_MITOSIS_EARLY_G1		68	0.284134	2.77131	0	0.000289894	0.014	5289	tags=79%, list=51%, signal=162%
REACTOME_CYCLIN_A_CDK2_ASSOCIATED_EVENTS_AT_S_PHASE_ENTRY		80	0.2608	2.75842	0	0.000305276	0.015	4559	tags=70%, list=44%, signal=124%
REACTOME_MRNA_SPLICING		169	0.187215	2.75649	0	0.000300102	0.015	4945	tags=66%, list=48%, signal=125%
REACTOME_RECOGNITION_OF_DNA_DAMAGE_BY_PCNA_CONTAINING_REPLICATION_COMPLEX		27	0.445328	2.75177	0	0.0002951	0.015	1533	tags=59%, list=15%, signal=69%
REACTOME_POLO_LIKE_KINASE_MEDIATED_EVENTS		15	0.589535	2.73334	0	0.000308531	0.016	1494	tags=73%, list=14%, signal=86%
REACTOME_REPRODUCTION		55	0.309356	2.71784	0	0.000303555	0.016	2644	tags=56%, list=26%, signal=75%
REACTOME_FORMATION_OF_FIBRIN_CLOT_CLOTTING_CASCADE		20	0.509428	2.71347	0	0.000298737	0.016	3529	tags=85%, list=34%, signal=129%
REACTOME_HDR_THROUGH_SINGLE_STRAND_ANNEALING_SSA		36	0.378936	2.69522	0	0.000294069	0.016	1838	tags=56%, list=18%, signal=67%
REACTOME_POST_CHAPERONIN_TUBULIN_FOLDING_PATHWAY		16	0.556255	2.68836	0	0.000325481	0.018	4594	tags=100%, list=44%, signal=180%
REACTOME_TP53_REGULATES_TRANSCRIPTION_OF_CELL_CYCLE_GENES		44	0.330854	2.65417	0	0.000391657	0.022	3171	tags=64%, list=31%, signal=91%
REACTOME_SCF_SKP2_MEDIATED_DEGRADATION_OF_P27_P21		56	0.297978	2.64968	0	0.000385812	0.022	5241	tags=80%, list=51%, signal=162%
REACTOME_DNA_REPAIR		254	0.143406	2.62957	0	0.000414045	0.024	3436	tags=47%, list=33%, signal=69%
REACTOME_PROCESSIVE_SYNTHESIS_ON_THE_C_STRAND_OF_THE_TELOMERE		17	0.533271	2.60971	0	0.000476282	0.028	1792	tags=71%, list=17%, signal=85%
REACTOME_HOST_INTERACTIONS_OF_HIV_FACTORS		111	0.206723	2.56955	0	0.000655209	0.039	5241	tags=71%, list=51%, signal=143%
REACTOME_ASSEMBLY_OF_THE_PRE_REPLICATIVE_COMPLEX		64	0.27926	2.54594	0	0.000860674	0.05	4559	tags=72%, list=44%, signal=128%
REACTOME_PCP_CE_PATHWAY		77	0.248947	2.52646	0.0019685	0.000913686	0.054	4559	tags=69%, list=44%, signal=122%
REACTOME_BASE_EXCISION_REPAIR		41	0.323044	2.51535	0	0.000932345	0.056	4992	tags=80%, list=48%, signal=155%
REACTOME_ORC1_REMOVAL_FROM_CHROMATIN		65	0.263681	2.50294	0	0.0010619	0.063	5241	tags=77%, list=51%, signal=155%
REACTOME_TRANSPORT_OF_MATURE_TRANSCRIPT_TO_CYTOPLASM		70	0.251333	2.49163	0	0.00112554	0.068	6130	tags=84%, list=59%, signal=206%
REACTOME_E2F_MEDIATED_REGULATION_OF_DNA_REPLICATION		21	0.442672	2.47695	0	0.00123294	0.076	1339	tags=57%, list=13%, signal=66%
REACTOME_HCMV_EARLY_EVENTS		60	0.273796	2.46318	0	0.00137058	0.085	4937	tags=75%, list=48%, signal=143%
REACTOME_THE_CITRIC_ACID_TCA_CYCLE_AND_RESPIRATORY_ELECTRON_TRANSPORT		154	0.172557	2.45813	0	0.00138224	0.087	6027	tags=75%, list=58%, signal=178%
REACTOME_FACTORS_INVOLVED_IN_MEGAKARYOCYTE_DEVELOPMENT_AND_PLATELET_PRODUCTION		107	0.203659	2.45763	0	0.00136474	0.087	2842	tags=48%, list=27%, signal=65%
REACTOME_INTEGRIN_CELL_SURFACE_INTERACTIONS		40	0.323689	2.43988	0	0.00155609	0.1	3126	tags=63%, list=30%, signal=89%
REACTOME_TRANSCRIPTION_OF_E2F_TARGETS_UNDER_NEGATIVE_CONTROL_BY_P107_RBL1_AND_P130_RBL2_IN_COMPLEX_WITH_HDAC1		15	0.520446	2.43281	0	0.00171247	0.109	2896	tags=80%, list=28%, signal=111%
REACTOME_SUMOYLATION_OF_DNA_REPLICATION_PROTEINS		40	0.313162	2.40513	0	0.00199462	0.13	5043	tags=80%, list=49%, signal=156%
REACTOME_ANTIMICROBIAL_PEPTIDES		21	0.43184	2.38307	0	0.00241095	0.16	2435	tags=67%, list=24%, signal=87%
REACTOME_DISEASES_OF_MITOTIC_CELL_CYCLE		36	0.343642	2.38149	0	0.00242442	0.161	3924	tags=72%, list=38%, signal=116%
REACTOME_GPCR_LIGAND_BINDING		124	0.186033	2.37609	0.0020284	0.00246473	0.166	3767	tags=55%, list=36%, signal=85%
REACTOME_TRANSCRIPTIONAL_REGULATION_BY_RUNX1		154	0.165214	2.37451	0.00212314	0.00246486	0.168	4424	tags=59%, list=43%, signal=102%
REACTOME_TERMINATION_OF_TRANSLESION_DNA_SYNTHESIS		27	0.380212	2.37294	0.00195312	0.00246424	0.17	2587	tags=63%, list=25%, signal=84%
REACTOME_REGULATION_OF_INSULIN_LIKE_GROWTH_FACTOR_IGF_TRANSPORT_AND_UPTAKE_BY_INSULIN_LIKE_GROWTH_FACTOR_BINDING_PROTEINS_IGFBPS		48	0.294607	2.36459	0	0.00259661	0.179	4289	tags=71%, list=41%, signal=121%
REACTOME_AUF1_HNRNP_D0_BINDS_AND_DESTABILIZES_MRNA		49	0.290085	2.36191	0	0.00261986	0.181	5241	tags=80%, list=51%, signal=161%
REACTOME_ABERRANT_REGULATION_OF_MITOTIC_G1_S_TRANSITION_IN_CANCER_DUE_TO_RB1_DEFECTS		16	0.49126	2.35996	0	0.00259075	0.181	2035	tags=69%, list=20%, signal=85%
REACTOME_RESOLUTION_OF_ABASIC_SITES_AP_SITES		34	0.33593	2.35594	0	0.00266601	0.187	2618	tags=59%, list=25%, signal=79%
REACTOME_RESPIRATORY_ELECTRON_TRANSPORT		97	0.202142	2.34638	0.00193424	0.00287894	0.205	6027	tags=78%, list=58%, signal=186%
REACTOME_REGULATION_OF_TP53_ACTIVITY_THROUGH_PHOSPHORYLATION		81	0.227301	2.33104	0	0.00316676	0.224	2134	tags=43%, list=21%, signal=54%
REACTOME_CYCLIN_A_B1_B2_ASSOCIATED_EVENTS_DURING_G2_M_TRANSITION		23	0.402785	2.33078	0	0.00314553	0.225	1687	tags=57%, list=16%, signal=67%
REACTOME_RESPIRATORY_ELECTRON_TRANSPORT_ATP_SYNTHESIS_BY_CHEMIOSMOTIC_COUPLING_AND_HEAT_PRODUCTION_BY_UNCOUPLING_PROTEINS		112	0.186619	2.31114	0.00199601	0.00367831	0.257	6027	tags=77%, list=58%, signal=182%
REACTOME_TRANSCRIPTION_OF_E2F_TARGETS_UNDER_NEGATIVE_CONTROL_BY_DREAM_COMPLEX		18	0.442684	2.30535	0	0.0037248	0.262	2896	tags=72%, list=28%, signal=100%
REACTOME_COMPLEX_I_BIOGENESIS		53	0.267166	2.30436	0	0.00369805	0.262	6027	tags=85%, list=58%, signal=203%
REACTOME_TRANSLESION_SYNTHESIS_BY_POLH		17	0.456222	2.28602	0	0.00412644	0.289	2587	tags=71%, list=25%, signal=94%
REACTOME_HCMV_INFECTION		78	0.211953	2.27303	0	0.00457572	0.32	4980	tags=69%, list=48%, signal=133%
REACTOME_TRANSPORT_OF_MATURE_MRNAS_DERIVED_FROM_INTRONLESS_TRANSCRIPTS		38	0.31088	2.25339	0.00196464	0.00499124	0.351	5773	tags=87%, list=56%, signal=196%
REACTOME_NUCLEAR_ENVELOPE_NE_REASSEMBLY		61	0.246422	2.24381	0	0.00533855	0.37	6108	tags=84%, list=59%, signal=203%
REACTOME_ANTIVIRAL_MECHANISM_BY_IFN_STIMULATED_GENES		70	0.226978	2.24234	0.00191571	0.00534294	0.372	6380	tags=84%, list=62%, signal=219%
REACTOME_TP53_REGULATES_TRANSCRIPTION_OF_GENES_INVOLVED_IN_G2_CELL_CYCLE_ARREST		17	0.453023	2.2399	0.00199203	0.00540676	0.376	2620	tags=71%, list=25%, signal=94%
REACTOME_ORGANELLE_BIOGENESIS_AND_MAINTENANCE		247	0.122125	2.22473	0.00202429	0.00581412	0.4	6717	tags=77%, list=65%, signal=214%
REACTOME_DEGRADATION_OF_DVL		51	0.258774	2.19836	0.00198807	0.00677731	0.453	5241	tags=76%, list=51%, signal=154%
REACTOME_TRANSCRIPTIONAL_REGULATION_BY_E2F6		32	0.323352	2.19504	0	0.00684573	0.462	1835	tags=50%, list=18%, signal=61%
REACTOME_ASYMMETRIC_LOCALIZATION_OF_PCP_PROTEINS		54	0.253375	2.19177	0	0.00691676	0.469	5241	tags=76%, list=51%, signal=153%
REACTOME_ACTIVATION_OF_AMPK_DOWNSTREAM_OF_NMDARS		17	0.439056	2.18787	0	0.00699418	0.473	3980	tags=82%, list=39%, signal=134%
REACTOME_METABOLISM_OF_POLYAMINES		53	0.254814	2.18386	0.00594059	0.00708317	0.477	7129	tags=94%, list=69%, signal=303%
REACTOME_RUNX1_REGULATES_TRANSCRIPTION_OF_GENES_INVOLVED_IN_DIFFERENTIATION_OF_HSCS		63	0.22683	2.17739	0.00403226	0.00730156	0.49	4559	tags=67%, list=44%, signal=119%
REACTOME_SNRNP_ASSEMBLY		45	0.268805	2.17596	0.00410678	0.00728977	0.494	6190	tags=87%, list=60%, signal=215%
REACTOME_CYCLIN_D_ASSOCIATED_EVENTS_IN_G1		42	0.277241	2.157	0	0.00832363	0.546	2805	tags=55%, list=27%, signal=75%
REACTOME_PEPTIDE_LIGAND_BINDING_RECEPTORS		52	0.252067	2.15582	0.00210084	0.00832226	0.55	3767	tags=62%, list=36%, signal=96%
REACTOME_INTERACTIONS_OF_REV_WITH_HOST_CELLULAR_PROTEINS		30	0.323144	2.15427	0.00389105	0.00831215	0.553	4937	tags=80%, list=48%, signal=153%
REACTOME_G1_S_DNA_DAMAGE_CHECKPOINTS		61	0.232283	2.14989	0.0019685	0.00843708	0.56	4559	tags=67%, list=44%, signal=120%
REACTOME_SIGNALING_BY_GPCR		286	0.108229	2.13393	0	0.00928521	0.602	3573	tags=45%, list=35%, signal=67%
REACTOME_TRANSCRIPTIONAL_REGULATION_OF_GRANULOPOIESIS		30	0.321591	2.12398	0.00785855	0.0098555	0.625	2197	tags=53%, list=21%, signal=68%
REACTOME_POSTMITOTIC_NUCLEAR_PORE_COMPLEX_NPC_REFORMATION		23	0.366239	2.1186	0.00194932	0.0102192	0.637	6108	tags=96%, list=59%, signal=233%
REACTOME_TRANSLESION_SYNTHESIS_BY_Y_FAMILY_DNA_POLYMERASES_BYPASSES_LESIONS_ON_DNA_TEMPLATE		33	0.30536	2.1136	0.00400802	0.0104308	0.651	3430	tags=64%, list=33%, signal=95%
REACTOME_RESPONSE_TO_ELEVATED_PLATELET_CYTOSOLIC_CA2		84	0.192849	2.10548	0.00362319	0.01085	0.672	4543	tags=63%, list=44%, signal=112%
REACTOME_INTERACTIONS_OF_VPR_WITH_HOST_CELLULAR_PROTEINS		32	0.312831	2.09463	0	0.0117551	0.7	6142	tags=91%, list=59%, signal=223%
REACTOME_APC_CDC20_MEDIATED_DEGRADATION_OF_NEK2A		24	0.364489	2.09345	0	0.0117362	0.701	3992	tags=75%, list=39%, signal=122%
REACTOME_REGULATION_OF_RUNX3_EXPRESSION_AND_ACTIVITY		52	0.244019	2.07596	0	0.0129064	0.733	5241	tags=75%, list=51%, signal=151%
REACTOME_NEGATIVE_REGULATION_OF_NOTCH4_SIGNALING		50	0.25402	2.07295	0.00200401	0.0130041	0.737	5241	tags=76%, list=51%, signal=153%
REACTOME_HEDGEHOG_OFF_STATE		92	0.182881	2.06745	0.00397614	0.0133169	0.752	5877	tags=75%, list=57%, signal=172%
REACTOME_RND3_GTPASE_CYCLE		32	0.299075	2.06506	0.00594059	0.0134347	0.756	3377	tags=63%, list=33%, signal=93%
REACTOME_NS1_MEDIATED_EFFECTS_ON_HOST_PATHWAYS		35	0.297878	2.06163	0	0.0136547	0.762	6380	tags=91%, list=62%, signal=238%
REACTOME_CROSS_PRESENTATION_OF_SOLUBLE_EXOGENOUS_ANTIGENS_ENDOSOMES		44	0.266654	2.05724	0.00387597	0.0139801	0.77	5241	tags=77%, list=51%, signal=156%
REACTOME_REGULATION_OF_MRNA_STABILITY_BY_PROTEINS_THAT_BIND_AU_RICH_ELEMENTS		77	0.196609	2.05242	0.00377358	0.0143483	0.783	4559	tags=64%, list=44%, signal=113%
REACTOME_UCH_PROTEINASES		80	0.19638	2.05038	0.00382409	0.0144004	0.788	7545	tags=93%, list=73%, signal=340%
REACTOME_PLATELET_HOMEOSTASIS		50	0.238765	2.04952	0.00222222	0.014345	0.79	6018	tags=82%, list=58%, signal=195%
REACTOME_DEGRADATION_OF_THE_EXTRACELLULAR_MATRIX		53	0.235363	2.04638	0.00596422	0.0145506	0.799	3624	tags=58%, list=35%, signal=90%
REACTOME_RHOB_GTPASE_CYCLE		53	0.234196	2.03839	0.00398406	0.0152303	0.813	1686	tags=40%, list=16%, signal=47%
REACTOME_NUCLEAR_ENVELOPE_BREAKDOWN		48	0.252546	2.0382	0.00192308	0.0151702	0.814	4937	tags=73%, list=48%, signal=139%
REACTOME_REGULATION_OF_HMOX1_EXPRESSION_AND_ACTIVITY		59	0.222877	2.02707	0.0102459	0.0161088	0.837	5241	tags=73%, list=51%, signal=147%
REACTOME_MUSCLE_CONTRACTION		84	0.18748	2.00996	0.00792079	0.0176613	0.863	4475	tags=62%, list=43%, signal=108%
REACTOME_FANCONI_ANEMIA_PATHWAY		31	0.312034	1.99999	0	0.0185169	0.877	2118	tags=52%, list=20%, signal=65%
REACTOME_NUCLEAR_IMPORT_OF_REV_PROTEIN		28	0.308757	1.99934	0.00402414	0.018477	0.878	4937	tags=79%, list=48%, signal=150%
REACTOME_DISEASES_OF_PROGRAMMED_CELL_DEATH		38	0.273327	1.99931	0.0077821	0.0183441	0.878	2896	tags=55%, list=28%, signal=76%
REACTOME_TRANSLESION_SYNTHESIS_BY_POLK		16	0.418669	1.99811	0.0100806	0.0182728	0.88	3430	tags=75%, list=33%, signal=112%
REACTOME_CLASS_A_1_RHODOPSIN_LIKE_RECEPTORS		91	0.176563	1.98834	0.00589391	0.0192335	0.899	3301	tags=49%, list=32%, signal=72%
REACTOME_REGULATION_OF_RAS_BY_GAPS		62	0.219917	1.98501	0.012024	0.0194619	0.904	5241	tags=73%, list=51%, signal=146%
REACTOME_BETA_CATENIN_INDEPENDENT_WNT_SIGNALING		116	0.154937	1.98108	0.00394477	0.0198565	0.906	5276	tags=66%, list=51%, signal=134%
REACTOME_DNA_DAMAGE_TELOMERE_STRESS_INDUCED_SENESCENCE		27	0.321972	1.97404	0.00386847	0.0206337	0.918	2039	tags=52%, list=20%, signal=64%
REACTOME_CELLULAR_RESPONSE_TO_HYPOXIA		65	0.207108	1.97067	0.00998004	0.0207929	0.921	6935	tags=88%, list=67%, signal=265%
REACTOME_HSF1_ACTIVATION		22	0.350586	1.95242	0.00948767	0.0233033	0.943	3430	tags=68%, list=33%, signal=102%
REACTOME_TRANSPORT_OF_THE_SLBP_DEPENDANT_MATURE_MRNA		32	0.285951	1.95093	0.00826446	0.0233376	0.943	5773	tags=84%, list=56%, signal=191%
REACTOME_SENESCENCE_ASSOCIATED_SECRETORY_PHENOTYPE_SASP		47	0.238328	1.94683	0.00591716	0.023779	0.949	3924	tags=62%, list=38%, signal=99%
REACTOME_DEGRADATION_OF_BETA_CATENIN_BY_THE_DESTRUCTION_COMPLEX		77	0.187422	1.94054	0.00580271	0.0244302	0.954	6935	tags=86%, list=67%, signal=259%
REACTOME_CELLULAR_SENESCENCE		121	0.154448	1.93955	0.00411523	0.0244341	0.956	1838	tags=33%, list=18%, signal=40%
REACTOME_DNA_DAMAGE_BYPASS		42	0.250607	1.93494	0.00406504	0.024965	0.959	2587	tags=50%, list=25%, signal=66%
REACTOME_HIV_INFECTION		197	0.119435	1.93456	0	0.0248716	0.959	7287	tags=82%, list=71%, signal=274%
REACTOME_TNFS_BIND_THEIR_PHYSIOLOGICAL_RECEPTORS		19	0.363457	1.92472	0.0020202	0.0259576	0.964	2233	tags=58%, list=22%, signal=74%
REACTOME_APC_C_CDC20_MEDIATED_DEGRADATION_OF_CYCLIN_B		22	0.352534	1.92244	0.00984252	0.0261097	0.969	5289	tags=86%, list=51%, signal=177%
REACTOME_NUCLEAR_PORE_COMPLEX_NPC_DISASSEMBLY		32	0.285951	1.92186	0.0159046	0.026018	0.969	5773	tags=84%, list=56%, signal=191%
REACTOME_REGULATION_OF_RUNX2_EXPRESSION_AND_ACTIVITY		62	0.210349	1.91714	0.004158	0.0266008	0.973	7673	tags=95%, list=74%, signal=367%
REACTOME_NON_INTEGRIN_MEMBRANE_ECM_INTERACTIONS		31	0.295059	1.91523	0.00610998	0.0267402	0.973	4960	tags=77%, list=48%, signal=148%
REACTOME_VIRAL_MESSENGER_RNA_SYNTHESIS		38	0.260004	1.90718	0.00821355	0.0278528	0.98	4937	tags=74%, list=48%, signal=141%
REACTOME_SMOOTH_MUSCLE_CONTRACTION		20	0.357998	1.89993	0.010142	0.0287455	0.982	3024	tags=65%, list=29%, signal=92%
REACTOME_ASSEMBLY_OF_COLLAGEN_FIBRILS_AND_OTHER_MULTIMERIC_STRUCTURES		17	0.391572	1.89956	0.00404858	0.0286243	0.982	3862	tags=76%, list=37%, signal=122%
REACTOME_DISORDERS_OF_TRANSMEMBRANE_TRANSPORTERS		118	0.152266	1.8944	0.01	0.029174	0.983	5888	tags=72%, list=57%, signal=165%
REACTOME_ACTIVATION_OF_ANTERIOR_HOX_GENES_IN_HINDBRAIN_DEVELOPMENT_DURING_EARLY_EMBRYOGENESIS		46	0.235589	1.89157	0.0123203	0.0295395	0.984	7236	tags=93%, list=70%, signal=310%
REACTOME_STABILIZATION_OF_P53		51	0.219364	1.89064	0.00769231	0.0295255	0.984	5241	tags=73%, list=51%, signal=146%
REACTOME_MITOTIC_PROPHASE		74	0.186961	1.87319	0.00829876	0.0324605	0.992	6181	tags=78%, list=60%, signal=194%
REACTOME_BINDING_AND_UPTAKE_OF_LIGANDS_BY_SCAVENGER_RECEPTORS		15	0.405039	1.8706	0.010101	0.0327013	0.992	3398	tags=73%, list=33%, signal=109%
REACTOME_TNFR2_NON_CANONICAL_NF_KB_PATHWAY		84	0.172767	1.86611	0.00851064	0.0333154	0.992	5241	tags=68%, list=51%, signal=137%
REACTOME_HEDGEHOG_LIGAND_BIOGENESIS		54	0.216143	1.86347	0.0121212	0.033592	0.994	5241	tags=72%, list=51%, signal=146%
REACTOME_RHO_GTPASE_CYCLE		351	0.0885639	1.85138	0.00603622	0.0355344	0.994	2177	tags=30%, list=21%, signal=36%
REACTOME_DECTIN_1_MEDIATED_NONCANONICAL_NF_KB_SIGNALING		56	0.208205	1.84472	0.0125261	0.0366948	0.995	5241	tags=71%, list=51%, signal=144%
REACTOME_CELLULAR_RESPONSE_TO_CHEMICAL_STRESS		137	0.135179	1.84427	0.00968992	0.0365902	0.995	7673	tags=88%, list=74%, signal=336%
REACTOME_TRANSCRIPTIONAL_REGULATION_BY_RUNX2		92	0.163067	1.83794	0.01222	0.0376197	0.996	7428	tags=88%, list=72%, signal=310%
REACTOME_EXPORT_OF_VIRAL_RIBONUCLEOPROTEINS_FROM_NUCLEUS		27	0.30077	1.83454	0.0083682	0.0380597	0.996	4937	tags=78%, list=48%, signal=149%
REACTOME_METALLOPROTEASE_DUBS		16	0.383679	1.82359	0.0173077	0.0400941	0.997	4437	tags=81%, list=43%, signal=142%
REACTOME_INHIBITION_OF_THE_PROTEOLYTIC_ACTIVITY_OF_APC_C_REQUIRED_FOR_THE_ONSET_OF_ANAPHASE_BY_MITOTIC_SPINDLE_CHECKPOINT_COMPONENTS		20	0.338803	1.80969	0.0206612	0.0429465	0.999	5289	tags=85%, list=51%, signal=174%
REACTOME_REGULATION_OF_GLUCOKINASE_BY_GLUCOKINASE_REGULATORY_PROTEIN		26	0.294258	1.80941	0.0172745	0.0427755	0.999	6108	tags=88%, list=59%, signal=216%
REACTOME_NONHOMOLOGOUS_END_JOINING_NHEJ		32	0.266925	1.80827	0.0139442	0.0428337	0.999	6292	tags=88%, list=61%, signal=223%
REACTOME_TRANSCRIPTIONAL_REGULATION_BY_RUNX3		83	0.168846	1.80589	0.022869	0.0431814	0.999	5241	tags=67%, list=51%, signal=136%
REACTOME_ADRENALINE_NORADRENALINE_INHIBITS_INSULIN_SECRETION		16	0.381245	1.80421	0.0212355	0.0432779	0.999	5754	tags=94%, list=56%, signal=211%
REACTOME_CHEMOKINE_RECEPTORS_BIND_CHEMOKINES		22	0.328716	1.80197	0.0168421	0.0434438	0.999	2716	tags=59%, list=26%, signal=80%
REACTOME_DEFECTIVE_CFTR_CAUSES_CYSTIC_FIBROSIS		56	0.208205	1.79464	0.0147992	0.0449922	1	5241	tags=71%, list=51%, signal=144%
REACTOME_RUNX1_INTERACTS_WITH_CO_FACTORS_WHOSE_PRECISE_EFFECT_ON_RUNX1_TARGETS_IS_NOT_KNOWN		34	0.257385	1.79271	0.00796813	0.045173	1	4339	tags=68%, list=42%, signal=116%
REACTOME_SUMOYLATION_OF_SUMOYLATION_PROTEINS		30	0.276371	1.79146	0.019802	0.0452207	1	6108	tags=87%, list=59%, signal=211%
REACTOME_SUMOYLATION_OF_UBIQUITINYLATION_PROTEINS		34	0.262707	1.78701	0.0225873	0.0461614	1	6108	tags=85%, list=59%, signal=208%
REACTOME_GAP_JUNCTION_TRAFFICKING_AND_REGULATION		20	0.332986	1.78418	0.0121704	0.0466893	1	5349	tags=85%, list=52%, signal=176%
REACTOME_NEURONAL_SYSTEM		180	0.114886	1.77883	0.00785855	0.0477996	1	4574	tags=56%, list=44%, signal=98%
REACTOME_CLASS_B_2_SECRETIN_FAMILY_RECEPTORS		30	0.275837	1.77852	0.0119522	0.0475989	1	3702	tags=63%, list=36%, signal=98%
REACTOME_ABC_TRANSPORTER_DISORDERS		62	0.187464	1.76945	0.020284	0.049667	1	5241	tags=69%, list=51%, signal=140%
REACTOME_REGULATION_OF_TP53_ACTIVITY		140	0.129044	1.76564	0.0121704	0.0504849	1	2153	tags=34%, list=21%, signal=42%
REACTOME_DEGRADATION_OF_AXIN		51	0.213124	1.76557	0.025641	0.0502482	1	7129	tags=90%, list=69%, signal=289%
REACTOME_PROTEIN_PROTEIN_INTERACTIONS_AT_SYNAPSES		36	0.25424	1.76509	0.0159363	0.0501192	1	2261	tags=47%, list=22%, signal=60%
REACTOME_THE_PHOTOTRANSDUCTION_CASCADE		16	0.365061	1.76419	0.0197239	0.0500924	1	5921	tags=94%, list=57%, signal=219%
REACTOME_METABOLISM_OF_COFACTORS		15	0.376163	1.76358	0.015873	0.0499673	1	4385	tags=80%, list=42%, signal=139%
REACTOME_DEREGULATED_CDK5_TRIGGERS_MULTIPLE_NEURODEGENERATIVE_PATHWAYS_IN_ALZHEIMER_S_DISEASE_MODELS		19	0.332789	1.75842	0.0227273	0.0511348	1	6357	tags=95%, list=62%, signal=246%
REACTOME_MITOCHONDRIAL_PROTEIN_IMPORT		55	0.201663	1.75571	0.0189076	0.0516648	1	8073	tags=98%, list=78%, signal=446%
REACTOME_NUCLEOBASE_BIOSYNTHESIS		15	0.375969	1.75544	0.0137795	0.0515091	1	6454	tags=100%, list=62%, signal=266%
REACTOME_L1CAM_INTERACTIONS		76	0.169061	1.75494	0.0277778	0.0513609	1	4520	tags=61%, list=44%, signal=107%
REACTOME_PLATELET_ACTIVATION_SIGNALING_AND_AGGREGATION		179	0.112348	1.75054	0.015873	0.0521733	1	4574	tags=55%, list=44%, signal=98%
REACTOME_PHOSPHORYLATION_OF_THE_APC_C		19	0.330861	1.7346	0.0356394	0.0562862	1	5289	tags=84%, list=51%, signal=172%
REACTOME_SUMOYLATION_OF_DNA_DAMAGE_RESPONSE_AND_REPAIR_PROTEINS		66	0.180127	1.73217	0.00998004	0.0566742	1	6292	tags=79%, list=61%, signal=200%
REACTOME_METABOLISM_OF_NUCLEOTIDES		79	0.161273	1.73062	0.0199203	0.0568043	1	6456	tags=78%, list=62%, signal=208%
REACTOME_RNA_POLYMERASE_II_TRANSCRIPTION_TERMINATION		56	0.201093	1.72981	0.0241935	0.0567936	1	4945	tags=68%, list=48%, signal=129%
REACTOME_PROGRAMMED_CELL_DEATH		172	0.114433	1.72818	0.0137255	0.0569942	1	5025	tags=60%, list=49%, signal=115%
REACTOME_SUMOYLATION_OF_RNA_BINDING_PROTEINS		40	0.230051	1.72728	0.0247619	0.0569941	1	6157	tags=83%, list=60%, signal=203%
REACTOME_SUMOYLATION		143	0.123091	1.71622	0.0286299	0.060212	1	1274	tags=24%, list=12%, signal=28%
REACTOME_PROCESSING_OF_CAPPED_INTRONLESS_PRE_MRNA		25	0.282114	1.71562	0.0239411	0.0601252	1	4945	tags=76%, list=48%, signal=145%
REACTOME_SUMOYLATION_OF_CHROMATIN_ORGANIZATION_PROTEINS		49	0.205002	1.71227	0.0329897	0.0607932	1	6538	tags=84%, list=63%, signal=227%
REACTOME_TRNA_PROCESSING_IN_THE_NUCLEUS		50	0.203189	1.7025	0.0315582	0.0636437	1	4937	tags=68%, list=48%, signal=130%
REACTOME_MAPK6_MAPK4_SIGNALING		76	0.165259	1.69541	0.0286299	0.0656585	1	4559	tags=61%, list=44%, signal=108%
REACTOME_CARBOXYTERMINAL_POST_TRANSLATIONAL_MODIFICATIONS_OF_TUBULIN		24	0.282126	1.68995	0.0325203	0.067286	1	3980	tags=67%, list=39%, signal=108%
REACTOME_COLLAGEN_FORMATION		28	0.264193	1.6877	0.0350195	0.0676702	1	4289	tags=68%, list=41%, signal=116%
REACTOME_SEALING_OF_THE_NUCLEAR_ENVELOPE_NE_BY_ESCRT_III		21	0.302252	1.68767	0.023301	0.0673667	1	5248	tags=81%, list=51%, signal=164%
REACTOME_DEGRADATION_OF_GLI1_BY_THE_PROTEASOME		54	0.197527	1.67974	0.0491159	0.0697951	1	5241	tags=70%, list=51%, signal=142%
REACTOME_ABERRANT_REGULATION_OF_MITOTIC_EXIT_IN_CANCER_DUE_TO_RB1_DEFECTS		19	0.319902	1.66588	0.0239044	0.0745763	1	5946	tags=89%, list=58%, signal=210%
REACTOME_REGULATION_OF_PTEN_STABILITY_AND_ACTIVITY		61	0.182393	1.66316	0.0311284	0.0752722	1	5241	tags=69%, list=51%, signal=139%
REACTOME_FGFR2_ALTERNATIVE_SPLICING		21	0.300368	1.6625	0.042065	0.075142	1	7236	tags=100%, list=70%, signal=333%
REACTOME_CONVERSION_FROM_APC_C_CDC20_TO_APC_C_CDH1_IN_LATE_ANAPHASE		19	0.319902	1.66214	0.0237154	0.0749639	1	5946	tags=89%, list=58%, signal=210%
REACTOME_SELECTIVE_AUTOPHAGY		62	0.180665	1.66075	0.0333988	0.0750597	1	4144	tags=58%, list=40%, signal=96%
REACTOME_RHOA_GTPASE_CYCLE		112	0.133171	1.65758	0.0216535	0.0758729	1	1775	tags=30%, list=17%, signal=36%
REACTOME_ANTIGEN_PROCESSING_CROSS_PRESENTATION		86	0.154058	1.65478	0.0343434	0.0765516	1	5270	tags=66%, list=51%, signal=134%
REACTOME_NRAGE_SIGNALS_DEATH_THROUGH_JNK		45	0.206835	1.64667	0.0342742	0.0791992	1	1775	tags=38%, list=17%, signal=45%
REACTOME_MRNA_SPLICING_MINOR_PATHWAY		44	0.208965	1.63985	0.0263158	0.0814637	1	7244	tags=91%, list=70%, signal=303%
REACTOME_DUAL_INCISION_IN_GG_NER		36	0.229254	1.62329	0.0469388	0.0881284	1	1370	tags=36%, list=13%, signal=41%
REACTOME_COLLAGEN_DEGRADATION		21	0.296476	1.61795	0.0360531	0.0901065	1	3339	tags=62%, list=32%, signal=91%
REACTOME_BASE_EXCISION_REPAIR_AP_SITE_FORMATION		16	0.329895	1.58884	0.0534653	0.102738	1	4992	tags=81%, list=48%, signal=157%
REACTOME_RAC1_GTPASE_CYCLE		147	0.112003	1.58869	0.0435644	0.10236	1	2092	tags=31%, list=20%, signal=39%
REACTOME_INTERLEUKIN_10_SIGNALING		31	0.237574	1.58417	0.0364683	0.104072	1	3552	tags=58%, list=34%, signal=88%
REACTOME_TCF_DEPENDENT_SIGNALING_IN_RESPONSE_TO_WNT		132	0.117608	1.58325	0.0433071	0.104022	1	6472	tags=74%, list=63%, signal=196%
REACTOME_GABA_RECEPTOR_ACTIVATION		24	0.269954	1.58109	0.0421687	0.104654	1	5828	tags=83%, list=56%, signal=191%
REACTOME_SIGNALING_BY_HEDGEHOG		114	0.126383	1.57959	0.0449898	0.104903	1	8045	tags=90%, list=78%, signal=403%
REACTOME_RHO_GTPASES_ACTIVATE_IQGAPS		23	0.269905	1.5729	0.0474227	0.1077	1	5304	tags=78%, list=51%, signal=160%
REACTOME_G_ALPHA_Z_SIGNALLING_EVENTS		26	0.259288	1.57153	0.061144	0.107982	1	5276	tags=77%, list=51%, signal=157%
REACTOME_ABC_FAMILY_PROTEINS_MEDIATED_TRANSPORT		84	0.14462	1.56807	0.0437262	0.109206	1	7129	tags=83%, list=69%, signal=266%
REACTOME_MAPK_FAMILY_SIGNALING_CASCADES		237	0.0895465	1.56558	0.0485437	0.109982	1	5069	tags=58%, list=49%, signal=111%
REACTOME_DNA_DOUBLE_STRAND_BREAK_RESPONSE		38	0.208819	1.56013	0.05	0.112364	1	6008	tags=79%, list=58%, signal=188%
REACTOME_PURINE_CATABOLISM		15	0.334109	1.55881	0.0610236	0.112504	1	4819	tags=80%, list=47%, signal=150%
REACTOME_STRIATED_MUSCLE_CONTRACTION		19	0.30431	1.55589	0.0604839	0.113607	1	4475	tags=74%, list=43%, signal=130%
REACTOME_INTRAFLAGELLAR_TRANSPORT		41	0.208137	1.55422	0.0658436	0.113956	1	6679	tags=85%, list=65%, signal=240%
REACTOME_ECM_PROTEOGLYCANS		24	0.26245	1.55039	0.0506823	0.115255	1	2891	tags=54%, list=28%, signal=75%
REACTOME_ONCOGENE_INDUCED_SENESCENCE		31	0.234162	1.54925	0.0645833	0.115341	1	2587	tags=48%, list=25%, signal=64%
REACTOME_INTERLEUKIN_4_AND_INTERLEUKIN_13_SIGNALING		79	0.14888	1.54128	0.0732177	0.119152	1	3705	tags=51%, list=36%, signal=78%
REACTOME_HEDGEHOG_ON_STATE		66	0.163369	1.53117	0.063655	0.124356	1	8030	tags=94%, list=78%, signal=419%
REACTOME_HIV_LIFE_CYCLE		125	0.116051	1.5213	0.0501002	0.129417	1	6338	tags=73%, list=61%, signal=186%
REACTOME_SYNDECAN_INTERACTIONS		18	0.298278	1.51048	0.0757895	0.135567	1	4960	tags=78%, list=48%, signal=149%
REACTOME_MET_PROMOTES_CELL_MOTILITY		25	0.246634	1.50299	0.0723809	0.139456	1	2417	tags=48%, list=23%, signal=63%
REACTOME_ELASTIC_FIBRE_FORMATION		16	0.311616	1.5022	0.0711382	0.139473	1	1305	tags=44%, list=13%, signal=50%
REACTOME_MEIOTIC_SYNAPSIS		26	0.250218	1.49286	0.0805785	0.144803	1	1792	tags=42%, list=17%, signal=51%
REACTOME_BASIGIN_INTERACTIONS		17	0.296803	1.48996	0.0724638	0.146122	1	3016	tags=59%, list=29%, signal=83%
REACTOME_GLUCAGON_SIGNALING_IN_METABOLIC_REGULATION		19	0.287918	1.48498	0.0862745	0.148603	1	5732	tags=84%, list=55%, signal=189%
REACTOME_EGFR_DOWNREGULATION		19	0.290923	1.48325	0.0824524	0.149136	1	5701	tags=84%, list=55%, signal=187%
REACTOME_TRANSCRIPTIONAL_REGULATION_BY_VENTX		36	0.204267	1.48235	0.062	0.14919	1	3924	tags=58%, list=38%, signal=94%
REACTOME_RND1_GTPASE_CYCLE		33	0.21033	1.47382	0.0641283	0.154139	1	4409	tags=64%, list=43%, signal=111%
REACTOME_ADP_SIGNALLING_THROUGH_P2Y_PURINOCEPTOR_1		16	0.302373	1.47293	0.0721248	0.154083	1	5276	tags=81%, list=51%, signal=166%
REACTOME_APOPTOSIS		148	0.10559	1.47244	0.0920502	0.153694	1	4859	tags=57%, list=47%, signal=107%
REACTOME_NEUROTRANSMITTER_RECEPTORS_AND_POSTSYNAPTIC_SIGNAL_TRANSMISSION		102	0.122812	1.46306	0.0976096	0.159093	1	4923	tags=60%, list=48%, signal=113%
REACTOME_PTEN_REGULATION		126	0.110948	1.46216	0.0840164	0.159119	1	4608	tags=56%, list=45%, signal=99%
REACTOME_TRANSCRIPTIONAL_REGULATION_BY_TP53		318	0.0718778	1.46045	0.0850202	0.159689	1	2984	tags=36%, list=29%, signal=49%
REACTOME_PURINERGIC_SIGNALING_IN_LEISHMANIASIS_INFECTION		26	0.238966	1.45135	0.0891089	0.165419	1	5883	tags=81%, list=57%, signal=187%
REACTOME_RNA_POLYMERASE_II_TRANSCRIBES_SNRNA_GENES		68	0.15137	1.45005	0.0793358	0.165709	1	7564	tags=88%, list=73%, signal=327%
REACTOME_ASSEMBLY_AND_CELL_SURFACE_PRESENTATION_OF_NMDA_RECEPTORS		24	0.248994	1.44884	0.0983264	0.165963	1	7336	tags=96%, list=71%, signal=329%
REACTOME_CDC42_GTPASE_CYCLE		124	0.11112	1.44496	0.0917782	0.167828	1	2865	tags=39%, list=28%, signal=53%
REACTOME_AQUAPORIN_MEDIATED_TRANSPORT		27	0.230748	1.4406	0.0868687	0.1701	1	5276	tags=74%, list=51%, signal=151%
REACTOME_COOPERATION_OF_PREFOLDIN_AND_TRIC_CCT_IN_ACTIN_AND_TUBULIN_FOLDING		25	0.236916	1.44048	0.108	0.169536	1	7478	tags=96%, list=72%, signal=346%
REACTOME_ACTIVATION_OF_KAINATE_RECEPTORS_UPON_GLUTAMATE_BINDING		17	0.288633	1.43234	0.0811881	0.174835	1	6140	tags=88%, list=59%, signal=217%
REACTOME_CRISTAE_FORMATION		23	0.244532	1.42813	0.0892857	0.177499	1	6015	tags=83%, list=58%, signal=197%
REACTOME_GABA_B_RECEPTOR_ACTIVATION		22	0.254718	1.42293	0.105469	0.180546	1	5828	tags=82%, list=56%, signal=187%
REACTOME_CELL_SURFACE_INTERACTIONS_AT_THE_VASCULAR_WALL		83	0.134335	1.41863	0.0912621	0.18311	1	3478	tags=47%, list=34%, signal=70%
REACTOME_FGFR2_MUTANT_RECEPTOR_ACTIVATION		15	0.300194	1.41417	0.094	0.185752	1	7236	tags=100%, list=70%, signal=333%
REACTOME_HCMV_LATE_EVENTS		44	0.177894	1.41204	0.11134	0.18667	1	4980	tags=66%, list=48%, signal=127%
REACTOME_GLUCOSE_METABOLISM		74	0.140084	1.41174	0.11691	0.186243	1	6662	tags=78%, list=64%, signal=219%
REACTOME_MITOCHONDRIAL_CALCIUM_ION_TRANSPORT		20	0.262627	1.41144	0.0996016	0.185808	1	7625	tags=100%, list=74%, signal=381%
REACTOME_POTASSIUM_CHANNELS		36	0.200731	1.40214	0.127701	0.192155	1	5970	tags=78%, list=58%, signal=184%
REACTOME_SIGNALING_BY_FGFR2_IIIA_TM		15	0.300194	1.40204	0.107595	0.191522	1	7236	tags=100%, list=70%, signal=333%
REACTOME_GLYCOLYSIS		60	0.151606	1.3971	0.105368	0.194733	1	6537	tags=78%, list=63%, signal=212%
REACTOME_RHOC_GTPASE_CYCLE		57	0.154761	1.39648	0.104331	0.194496	1	2216	tags=37%, list=21%, signal=47%
REACTOME_COMPLEMENT_CASCADE		20	0.257974	1.39165	0.100746	0.197697	1	3539	tags=60%, list=34%, signal=91%
REACTOME_CELL_DEATH_SIGNALLING_VIA_NRAGE_NRIF_AND_NADE		60	0.152238	1.38658	0.123482	0.200923	1	3430	tags=48%, list=33%, signal=72%
REACTOME_HSP90_CHAPERONE_CYCLE_FOR_STEROID_HORMONE_RECEPTORS_SHR		41	0.182477	1.38357	0.118393	0.202655	1	6439	tags=80%, list=62%, signal=213%
REACTOME_PYRUVATE_METABOLISM_AND_CITRIC_ACID_TCA_CYCLE		46	0.167416	1.38321	0.1125	0.202262	1	4792	tags=63%, list=46%, signal=117%
REACTOME_CARDIAC_CONDUCTION		50	0.165241	1.38318	0.116466	0.201562	1	3467	tags=50%, list=34%, signal=75%
REACTOME_COLLAGEN_BIOSYNTHESIS_AND_MODIFYING_ENZYMES		19	0.269612	1.37985	0.13843	0.203473	1	4289	tags=68%, list=41%, signal=117%
REACTOME_HDACS_DEACETYLATE_HISTONES		31	0.205623	1.37768	0.134021	0.204649	1	4548	tags=65%, list=44%, signal=115%
REACTOME_INTERLEUKIN_1_FAMILY_SIGNALING		117	0.109643	1.37708	0.105263	0.204425	1	5327	tags=62%, list=52%, signal=127%
REACTOME_SUMOYLATION_OF_DNA_METHYLATION_PROTEINS		15	0.290892	1.3768	0.127016	0.203949	1	2509	tags=53%, list=24%, signal=70%
REACTOME_INTERCONVERSION_OF_NUCLEOTIDE_DI_AND_TRIPHOSPHATES		24	0.227354	1.376	0.142268	0.20397	1	1961	tags=42%, list=19%, signal=51%
REACTOME_REGULATION_OF_HSF1_MEDIATED_HEAT_SHOCK_RESPONSE		68	0.143603	1.37535	0.114851	0.203839	1	5060	tags=63%, list=49%, signal=123%
REACTOME_RAS_PROCESSING		20	0.259937	1.37395	0.121723	0.204322	1	5069	tags=75%, list=49%, signal=147%
REACTOME_VASOPRESSIN_REGULATES_RENAL_WATER_HOMEOSTASIS_VIA_AQUAPORINS		26	0.220729	1.3695	0.151515	0.207258	1	5276	tags=73%, list=51%, signal=149%
REACTOME_SEMAPHORIN_INTERACTIONS		48	0.166497	1.36793	0.118217	0.207843	1	4315	tags=58%, list=42%, signal=100%
REACTOME_PROTEIN_FOLDING		75	0.134035	1.36744	0.115914	0.207566	1	4687	tags=59%, list=45%, signal=107%
REACTOME_INTERFERON_SIGNALING		138	0.09881	1.36299	0.121212	0.210483	1	6181	tags=70%, list=60%, signal=171%
REACTOME_TRANSPORT_OF_BILE_SALTS_AND_ORGANIC_ACIDS_METAL_IONS_AND_AMINE_COMPOUNDS		43	0.173433	1.35889	0.144269	0.213361	1	3021	tags=47%, list=29%, signal=65%
REACTOME_P75_NTR_RECEPTOR_MEDIATED_SIGNALLING		78	0.130545	1.35268	0.132827	0.217824	1	3430	tags=46%, list=33%, signal=69%
REACTOME_C_TYPE_LECTIN_RECEPTORS_CLRS		116	0.107533	1.3514	0.132653	0.218085	1	4424	tags=53%, list=43%, signal=92%
REACTOME_PEPTIDE_HORMONE_METABOLISM		39	0.182887	1.34053	0.133462	0.226971	1	3151	tags=49%, list=30%, signal=70%
REACTOME_CHAPERONE_MEDIATED_AUTOPHAGY		16	0.278358	1.33947	0.150097	0.227137	1	3586	tags=63%, list=35%, signal=96%
REACTOME_G_ALPHA_12_13_SIGNALLING_EVENTS		56	0.1504	1.33715	0.130879	0.228438	1	1775	tags=32%, list=17%, signal=39%
REACTOME_TRANSCRIPTION_COUPLED_NUCLEOTIDE_EXCISION_REPAIR_TC_NER		70	0.135467	1.32494	0.138829	0.238737	1	7467	tags=86%, list=72%, signal=307%
REACTOME_FORMATION_OF_TUBULIN_FOLDING_INTERMEDIATES_BY_CCT_TRIC		18	0.256276	1.32174	0.140684	0.240837	1	4245	tags=67%, list=41%, signal=113%
REACTOME_TRANSMISSION_ACROSS_CHEMICAL_SYNAPSES		135	0.0973856	1.31753	0.148297	0.244004	1	6355	tags=71%, list=61%, signal=182%
REACTOME_RND2_GTPASE_CYCLE		35	0.187545	1.30942	0.157791	0.250938	1	1906	tags=37%, list=18%, signal=45%
REACTOME_ATTENUATION_PHASE		19	0.247424	1.30611	0.151163	0.25327	1	3430	tags=58%, list=33%, signal=86%
REACTOME_OXIDATIVE_STRESS_INDUCED_SENESCENCE		60	0.145474	1.2917	0.146881	0.266833	1	3844	tags=52%, list=37%, signal=82%
REACTOME_HIV_TRANSCRIPTION_INITIATION		40	0.175571	1.29086	0.192534	0.266788	1	7493	tags=90%, list=73%, signal=326%
REACTOME_MHC_CLASS_II_ANTIGEN_PRESENTATION		94	0.114882	1.28837	0.174897	0.268389	1	1901	tags=30%, list=18%, signal=36%
REACTOME_APOPTOTIC_EXECUTION_PHASE		39	0.172397	1.2879	0.158824	0.267949	1	2729	tags=44%, list=26%, signal=59%
REACTOME_ACTIVATION_OF_BH3_ONLY_PROTEINS		26	0.207586	1.2871	0.14375	0.267871	1	3424	tags=54%, list=33%, signal=80%
REACTOME_SIGNALING_BY_WNT		202	0.07818	1.28442	0.193359	0.26981	1	6472	tags=70%, list=63%, signal=184%
REACTOME_TELOMERE_EXTENSION_BY_TELOMERASE		21	0.231641	1.27887	0.166667	0.274623	1	4992	tags=71%, list=48%, signal=138%
REACTOME_GLYCEROPHOSPHOLIPID_BIOSYNTHESIS		78	0.125427	1.27796	0.165306	0.274623	1	3615	tags=47%, list=35%, signal=72%
REACTOME_NICOTINATE_METABOLISM		21	0.226281	1.26817	0.180583	0.283427	1	4063	tags=62%, list=39%, signal=102%
REACTOME_PYROPTOSIS		20	0.238076	1.26706	0.185629	0.283659	1	4261	tags=65%, list=41%, signal=110%
REACTOME_COPI_DEPENDENT_GOLGI_TO_ER_RETROGRADE_TRAFFIC		77	0.122936	1.26476	0.192913	0.285267	1	1825	tags=30%, list=18%, signal=36%
REACTOME_TP53_REGULATES_TRANSCRIPTION_OF_ADDITIONAL_CELL_CYCLE_GENES_WHOSE_EXACT_ROLE_IN_THE_P53_PATHWAY_REMAIN_UNCERTAIN		18	0.249071	1.26294	0.184524	0.286317	1	3171	tags=56%, list=31%, signal=80%
REACTOME_IMMUNOREGULATORY_INTERACTIONS_BETWEEN_A_LYMPHOID_AND_A_NON_LYMPHOID_CELL		46	0.159539	1.26222	0.18	0.286122	1	3525	tags=50%, list=34%, signal=76%
REACTOME_VISUAL_PHOTOTRANSDUCTION		42	0.165765	1.25542	0.203629	0.292763	1	5921	tags=74%, list=57%, signal=172%
REACTOME_ADORA2B_MEDIATED_ANTI_INFLAMMATORY_CYTOKINES_PRODUCTION		43	0.161107	1.2467	0.204239	0.301444	1	5311	tags=67%, list=51%, signal=138%
REACTOME_PROCESSING_OF_INTRONLESS_PRE_MRNAS		18	0.244079	1.24422	0.198381	0.303428	1	4945	tags=72%, list=48%, signal=138%
REACTOME_RECYCLING_PATHWAY_OF_L1		34	0.180796	1.24359	0.221095	0.303206	1	4520	tags=62%, list=44%, signal=109%
REACTOME_ACTIVATION_OF_NMDA_RECEPTORS_AND_POSTSYNAPTIC_EVENTS		61	0.13808	1.24292	0.216495	0.302964	1	4002	tags=52%, list=39%, signal=85%
REACTOME_DUAL_INCISION_IN_TC_NER		57	0.137816	1.23096	0.197938	0.315217	1	7467	tags=86%, list=72%, signal=308%
REACTOME_CELLULAR_RESPONSE_TO_HEAT_STRESS		84	0.115257	1.22556	0.218147	0.320685	1	7430	tags=83%, list=72%, signal=294%
REACTOME_TRANSPORT_OF_SMALL_MOLECULES		432	0.0518852	1.22093	0.223969	0.325016	1	5179	tags=55%, list=50%, signal=106%
REACTOME_NUCLEOTIDE_EXCISION_REPAIR		99	0.106516	1.21516	0.223092	0.330791	1	7469	tags=83%, list=72%, signal=296%
REACTOME_SIGNALING_BY_FGFR		55	0.13685	1.2142	0.219844	0.331058	1	7236	tags=84%, list=70%, signal=277%
REACTOME_THE_NLRP3_INFLAMMASOME		16	0.252265	1.21185	0.220165	0.332786	1	6439	tags=88%, list=62%, signal=232%
REACTOME_NEUTROPHIL_DEGRANULATION		363	0.0549605	1.20616	0.201923	0.338589	1	3323	tags=37%, list=32%, signal=53%
REACTOME_GLUCAGON_LIKE_PEPTIDE_1_GLP1_REGULATES_INSULIN_SECRETION		27	0.1959	1.20279	0.233129	0.341258	1	6018	tags=78%, list=58%, signal=186%
REACTOME_SLC_MEDIATED_TRANSMEMBRANE_TRANSPORT		131	0.0891613	1.19776	0.228516	0.346167	1	3665	tags=44%, list=35%, signal=68%
REACTOME_CONSTITUTIVE_SIGNALING_BY_ABERRANT_PI3K_IN_CANCER		39	0.160159	1.19122	0.227642	0.353056	1	4445	tags=59%, list=43%, signal=103%
REACTOME_TRANSCRIPTIONAL_REGULATION_BY_SMALL_RNAS		41	0.156975	1.18955	0.25625	0.354081	1	4937	tags=63%, list=48%, signal=121%
REACTOME_O_LINKED_GLYCOSYLATION		48	0.144229	1.18648	0.241176	0.356751	1	1745	tags=31%, list=17%, signal=37%
REACTOME_METABOLISM_OF_STEROID_HORMONES		15	0.254457	1.176	0.255578	0.36888	1	4263	tags=67%, list=41%, signal=113%
REACTOME_MITOCHONDRIAL_FATTY_ACID_BETA_OXIDATION		29	0.181324	1.17539	0.25102	0.368497	1	6327	tags=79%, list=61%, signal=204%
REACTOME_CARGO_RECOGNITION_FOR_CLATHRIN_MEDIATED_ENDOCYTOSIS		69	0.118166	1.17313	0.243137	0.370175	1	4927	tags=59%, list=48%, signal=113%
REACTOME_G_ALPHA_S_SIGNALLING_EVENTS		49	0.138867	1.16494	0.261044	0.379508	1	5320	tags=65%, list=51%, signal=134%
REACTOME_REGULATED_NECROSIS		45	0.150502	1.16423	0.270541	0.379237	1	3503	tags=49%, list=34%, signal=74%
REACTOME_ARACHIDONIC_ACID_METABOLISM		27	0.187643	1.15744	0.270428	0.386855	1	4572	tags=63%, list=44%, signal=113%
REACTOME_PLATELET_SENSITIZATION_BY_LDL		16	0.238892	1.1472	0.283925	0.399807	1	6577	tags=88%, list=64%, signal=240%
REACTOME_ION_HOMEOSTASIS		29	0.177172	1.14218	0.303922	0.405413	1	2806	tags=45%, list=27%, signal=61%
REACTOME_RHOQ_GTPASE_CYCLE		48	0.139867	1.13613	0.294118	0.412516	1	3943	tags=52%, list=38%, signal=84%
REACTOME_INTEGRATION_OF_ENERGY_METABOLISM		70	0.115712	1.13334	0.292731	0.415189	1	6341	tags=73%, list=61%, signal=187%
REACTOME_LATE_ENDOSOMAL_MICROAUTOPHAGY		25	0.181804	1.13199	0.289109	0.415735	1	4739	tags=64%, list=46%, signal=118%
REACTOME_INTERLEUKIN_7_SIGNALING		20	0.212385	1.13101	0.283495	0.415825	1	4526	tags=65%, list=44%, signal=115%
REACTOME_RHOBTB1_GTPASE_CYCLE		22	0.202	1.1301	0.298651	0.415917	1	7781	tags=95%, list=75%, signal=385%
REACTOME_FATTY_ACID_METABOLISM		114	0.0883733	1.12955	0.27821	0.415452	1	6711	tags=74%, list=65%, signal=208%
REACTOME_INWARDLY_RECTIFYING_K_CHANNELS		15	0.236337	1.12649	0.303263	0.418398	1	5828	tags=80%, list=56%, signal=183%
REACTOME_PKMTS_METHYLATE_HISTONE_LYSINES		36	0.158211	1.1228	0.296066	0.421915	1	6695	tags=81%, list=65%, signal=228%
REACTOME_CITRIC_ACID_CYCLE_TCA_CYCLE		21	0.204382	1.12166	0.305816	0.422295	1	4781	tags=67%, list=46%, signal=124%
REACTOME_EPIGENETIC_REGULATION_OF_GENE_EXPRESSION		83	0.104695	1.12159	0.293893	0.42115	1	8140	tags=89%, list=79%, signal=416%
REACTOME_SIGNALING_BY_FGFR2		49	0.137143	1.11914	0.306043	0.423261	1	7236	tags=84%, list=70%, signal=278%
REACTOME_POSITIVE_EPIGENETIC_REGULATION_OF_RRNA_EXPRESSION		43	0.143116	1.11224	0.309091	0.431133	1	8140	tags=93%, list=79%, signal=436%
REACTOME_SLC_TRANSPORTER_DISORDERS		56	0.127307	1.10588	0.321224	0.438819	1	5888	tags=70%, list=57%, signal=161%
REACTOME_ABORTIVE_ELONGATION_OF_HIV_1_TRANSCRIPT_IN_THE_ABSENCE_OF_TAT		21	0.204936	1.10316	0.326772	0.441371	1	7236	tags=90%, list=70%, signal=301%
REACTOME_APOPTOTIC_CLEAVAGE_OF_CELLULAR_PROTEINS		30	0.171034	1.09894	0.323944	0.446081	1	2715	tags=43%, list=26%, signal=59%
REACTOME_INSERTION_OF_TAIL_ANCHORED_PROTEINS_INTO_THE_ENDOPLASMIC_RETICULUM_MEMBRANE		17	0.221754	1.08707	0.360887	0.461741	1	7438	tags=94%, list=72%, signal=335%
REACTOME_INFLAMMASOMES		21	0.197083	1.08703	0.312373	0.460508	1	7317	tags=90%, list=71%, signal=309%
REACTOME_INTRINSIC_PATHWAY_FOR_APOPTOSIS		46	0.136406	1.08609	0.318982	0.460462	1	3089	tags=43%, list=30%, signal=62%
REACTOME_NEUREXINS_AND_NEUROLIGINS		23	0.1866	1.0775	0.346228	0.471759	1	4815	tags=65%, list=47%, signal=122%
REACTOME_GENE_SILENCING_BY_RNA		57	0.120247	1.07044	0.365631	0.48081	1	3296	tags=44%, list=32%, signal=64%
REACTOME_INITIATION_OF_NUCLEAR_ENVELOPE_NE_REFORMATION		19	0.200731	1.06861	0.335984	0.482158	1	648	tags=26%, list=6%, signal=28%
REACTOME_PYRUVATE_METABOLISM		24	0.180705	1.06151	0.369697	0.491165	1	5887	tags=75%, list=57%, signal=174%
REACTOME_SENSORY_PERCEPTION		84	0.0987186	1.05916	0.350294	0.493423	1	5754	tags=65%, list=56%, signal=147%
REACTOME_G_BETA_GAMMA_SIGNALLING_THROUGH_PI3KGAMMA		18	0.211996	1.05519	0.362903	0.49828	1	5276	tags=72%, list=51%, signal=147%
REACTOME_RHOV_GTPASE_CYCLE		29	0.163939	1.05005	0.396414	0.50482	1	2586	tags=41%, list=25%, signal=55%
REACTOME_RNA_POLYMERASE_III_TRANSCRIPTION_TERMINATION		19	0.194853	1.04341	0.390291	0.513611	1	7236	tags=89%, list=70%, signal=298%
REACTOME_DISEASES_ASSOCIATED_WITH_O_GLYCOSYLATION_OF_PROTEINS		24	0.17622	1.03414	0.385686	0.526253	1	1627	tags=33%, list=16%, signal=39%
REACTOME_LEISHMANIA_INFECTION		146	0.0741183	1.03309	0.396341	0.526419	1	6181	tags=67%, list=60%, signal=165%
REACTOME_FORMATION_OF_THE_EARLY_ELONGATION_COMPLEX		30	0.154682	1.02953	0.381466	0.530729	1	7362	tags=87%, list=71%, signal=300%
REACTOME_NEGATIVE_REGULATION_OF_MAPK_PATHWAY		40	0.136401	1.02909	0.410463	0.53009	1	6346	tags=75%, list=61%, signal=194%
REACTOME_ONCOGENIC_MAPK_SIGNALING		70	0.10437	1.02619	0.396887	0.533425	1	9115	tags=99%, list=88%, signal=829%
REACTOME_INHIBITION_OF_DNA_RECOMBINATION_AT_TELOMERE		19	0.194853	1.025	0.40668	0.533869	1	7236	tags=89%, list=70%, signal=298%
REACTOME_REGULATION_OF_INSULIN_SECRETION		48	0.127139	1.02359	0.408898	0.534664	1	6873	tags=79%, list=67%, signal=235%
REACTOME_SENSORY_PROCESSING_OF_SOUND		36	0.140386	1.02353	0.411647	0.533316	1	8314	tags=94%, list=80%, signal=481%
REACTOME_MICRORNA_MIRNA_BIOGENESIS		20	0.183204	1.02315	0.401606	0.532516	1	2760	tags=45%, list=27%, signal=61%
REACTOME_SYNTHESIS_OF_ACTIVE_UBIQUITIN_ROLES_OF_E1_AND_E2_ENZYMES		28	0.160498	1.022	0.428858	0.532887	1	6096	tags=75%, list=59%, signal=182%
REACTOME_PLASMA_LIPOPROTEIN_ASSEMBLY_REMODELING_AND_CLEARANCE		44	0.128963	1.01421	0.417012	0.543889	1	4544	tags=57%, list=44%, signal=101%
REACTOME_REGULATION_OF_KIT_SIGNALING		15	0.217248	1.01405	0.411067	0.542698	1	1202	tags=33%, list=12%, signal=38%
REACTOME_OTHER_INTERLEUKIN_SIGNALING		18	0.19652	1.01248	0.422222	0.543802	1	3139	tags=50%, list=30%, signal=72%
REACTOME_SIGNALING_BY_INTERLEUKINS		340	0.0491555	1.00668	0.427386	0.55156	1	4584	tags=49%, list=44%, signal=85%
REACTOME_ION_TRANSPORT_BY_P_TYPE_ATPASES		32	0.148752	1.00274	0.45	0.556379	1	2665	tags=41%, list=26%, signal=55%
REACTOME_IRON_UPTAKE_AND_TRANSPORT		42	0.126209	1.0019	0.431412	0.556308	1	5836	tags=69%, list=56%, signal=158%
REACTOME_NERVOUS_SYSTEM_DEVELOPMENT		372	0.0453703	0.999986	0.448413	0.558044	1	4520	tags=48%, list=44%, signal=82%
REACTOME_CELL_JUNCTION_ORGANIZATION		39	0.135878	0.996453	0.447853	0.562075	1	3635	tags=49%, list=35%, signal=75%
REACTOME_REGULATION_OF_TP53_ACTIVITY_THROUGH_ACETYLATION		29	0.15197	0.992621	0.451737	0.566752	1	5204	tags=66%, list=50%, signal=132%
REACTOME_PLATELET_CALCIUM_HOMEOSTASIS		18	0.195729	0.987771	0.432	0.573263	1	6018	tags=78%, list=58%, signal=186%
REACTOME_FORMATION_OF_RNA_POL_II_ELONGATION_COMPLEX		51	0.114284	0.986371	0.438492	0.573967	1	6119	tags=71%, list=59%, signal=172%
REACTOME_TRANSPORT_OF_VITAMINS_NUCLEOSIDES_AND_RELATED_MOLECULES		25	0.165684	0.986271	0.450216	0.572633	1	3665	tags=52%, list=35%, signal=80%
REACTOME_FCGR3A_MEDIATED_IL10_SYNTHESIS		28	0.154288	0.983697	0.447137	0.575347	1	6160	tags=75%, list=60%, signal=185%
REACTOME_COPI_INDEPENDENT_GOLGI_TO_ER_RETROGRADE_TRAFFIC		41	0.127505	0.978698	0.426229	0.581948	1	3980	tags=51%, list=39%, signal=83%
REACTOME_SIGNAL_TRANSDUCTION_BY_L1		18	0.195486	0.975929	0.465957	0.584765	1	853	tags=28%, list=8%, signal=30%
REACTOME_TP53_REGULATES_TRANSCRIPTION_OF_DNA_REPAIR_GENES		55	0.110488	0.975248	0.474012	0.584443	1	5440	tags=64%, list=53%, signal=134%
REACTOME_PLASMA_LIPOPROTEIN_CLEARANCE		25	0.162949	0.973454	0.46281	0.585829	1	4520	tags=60%, list=44%, signal=106%
REACTOME_DNA_DAMAGE_RECOGNITION_IN_GG_NER		36	0.138808	0.972753	0.487859	0.585515	1	7469	tags=86%, list=72%, signal=309%
REACTOME_CASPASE_ACTIVATION_VIA_EXTRINSIC_APOPTOTIC_SIGNALLING_PATHWAY		21	0.1729	0.972194	0.484342	0.584886	1	6090	tags=76%, list=59%, signal=185%
REACTOME_GLOBAL_GENOME_NUCLEOTIDE_EXCISION_REPAIR_GG_NER		76	0.0936918	0.958584	0.491194	0.605406	1	7469	tags=82%, list=72%, signal=292%
REACTOME_RMTS_METHYLATE_HISTONE_ARGININES		28	0.151908	0.956202	0.465385	0.607718	1	4339	tags=57%, list=42%, signal=98%
REACTOME_SIGNAL_AMPLIFICATION		22	0.171588	0.953173	0.501039	0.610997	1	5276	tags=68%, list=51%, signal=139%
REACTOME_DETOXIFICATION_OF_REACTIVE_OXYGEN_SPECIES		28	0.15171	0.951296	0.491461	0.612666	1	7663	tags=89%, list=74%, signal=344%
REACTOME_RHOG_GTPASE_CYCLE		59	0.10341	0.947862	0.48847	0.616845	1	7870	tags=86%, list=76%, signal=360%
REACTOME_SPRY_REGULATION_OF_FGF_SIGNALING		15	0.202132	0.940228	0.522822	0.627914	1	6181	tags=80%, list=60%, signal=199%
REACTOME_COPI_MEDIATED_ANTEROGRADE_TRANSPORT		78	0.0904261	0.938072	0.499018	0.629788	1	7419	tags=81%, list=72%, signal=284%
REACTOME_NUCLEOBASE_CATABOLISM		24	0.158993	0.934035	0.528827	0.634881	1	4819	tags=63%, list=47%, signal=117%
REACTOME_AMYLOID_FIBER_FORMATION		33	0.137361	0.933925	0.51992	0.633472	1	3908	tags=52%, list=38%, signal=83%
REACTOME_ION_CHANNEL_TRANSPORT		98	0.0786602	0.925636	0.543137	0.645655	1	8896	tags=94%, list=86%, signal=668%
REACTOME_CA_DEPENDENT_EVENTS		26	0.151518	0.921774	0.542914	0.650406	1	4002	tags=54%, list=39%, signal=88%
REACTOME_G_PROTEIN_BETA_GAMMA_SIGNALLING		24	0.158023	0.918496	0.573674	0.654368	1	4829	tags=63%, list=47%, signal=117%
REACTOME_NEGATIVE_REGULATION_OF_FGFR3_SIGNALING		18	0.17993	0.918372	0.527778	0.652985	1	6181	tags=78%, list=60%, signal=193%
REACTOME_ANTI_INFLAMMATORY_RESPONSE_FAVOURING_LEISHMANIA_PARASITE_INFECTION		67	0.0945075	0.917125	0.56998	0.653389	1	5353	tags=61%, list=52%, signal=126%
REACTOME_RHOBTB_GTPASE_CYCLE		34	0.129805	0.912793	0.567677	0.659002	1	7781	tags=88%, list=75%, signal=356%
REACTOME_THROMBIN_SIGNALLING_THROUGH_PROTEINASE_ACTIVATED_RECEPTORS_PARS		21	0.165849	0.910418	0.576923	0.661342	1	3702	tags=52%, list=36%, signal=81%
REACTOME_NCAM_SIGNALING_FOR_NEURITE_OUT_GROWTH		34	0.129265	0.906071	0.587302	0.666908	1	3227	tags=44%, list=31%, signal=64%
REACTOME_RHOF_GTPASE_CYCLE		34	0.128411	0.900649	0.557692	0.674286	1	1108	tags=24%, list=11%, signal=26%
REACTOME_SYNTHESIS_OF_IP3_AND_IP4_IN_THE_CYTOSOL		19	0.172206	0.898111	0.579832	0.676787	1	3662	tags=53%, list=35%, signal=81%
REACTOME_NEGATIVE_REGULATION_OF_FGFR1_SIGNALING		18	0.17993	0.897991	0.586345	0.675358	1	6181	tags=78%, list=60%, signal=193%
REACTOME_STIMULI_SENSING_CHANNELS		52	0.105538	0.897659	0.57485	0.674333	1	8255	tags=90%, list=80%, signal=447%
REACTOME_INTRA_GOLGI_AND_RETROGRADE_GOLGI_TO_ER_TRAFFIC		169	0.0612752	0.894913	0.573864	0.67713	1	8488	tags=88%, list=82%, signal=485%
REACTOME_ESR_MEDIATED_SIGNALING		123	0.067749	0.894418	0.594118	0.676255	1	9138	tags=95%, list=88%, signal=812%
REACTOME_GOLGI_TO_ER_RETROGRADE_TRANSPORT		108	0.0736938	0.893937	0.580392	0.675401	1	8432	tags=89%, list=82%, signal=478%
REACTOME_SIGNALING_BY_BRAF_AND_RAF_FUSIONS		55	0.100301	0.891635	0.578154	0.677615	1	9115	tags=98%, list=88%, signal=827%
REACTOME_DISASSEMBLY_OF_THE_DESTRUCTION_COMPLEX_AND_RECRUITMENT_OF_AXIN_TO_THE_MEMBRANE		25	0.148982	0.889958	0.583673	0.678722	1	6731	tags=80%, list=65%, signal=229%
REACTOME_SIGNALING_BY_RETINOIC_ACID		22	0.155743	0.886033	0.564547	0.683567	1	2151	tags=36%, list=21%, signal=46%
REACTOME_ERCC6_CSB_AND_EHMT2_G9A_POSITIVELY_REGULATE_RRNA_EXPRESSION		16	0.185132	0.884372	0.606403	0.684806	1	4548	tags=63%, list=44%, signal=111%
REACTOME_ROLE_OF_PHOSPHOLIPIDS_IN_PHAGOCYTOSIS		20	0.167935	0.884162	0.57563	0.683543	1	6018	tags=75%, list=58%, signal=179%
REACTOME_GLUTATHIONE_CONJUGATION		21	0.162096	0.883639	0.57377	0.682737	1	4725	tags=62%, list=46%, signal=114%
REACTOME_TRANSCRIPTIONAL_REGULATION_BY_THE_AP_2_TFAP2_FAMILY_OF_TRANSCRIPTION_FACTORS		19	0.166364	0.883423	0.559917	0.681525	1	6442	tags=79%, list=62%, signal=209%
REACTOME_SENSORY_PROCESSING_OF_SOUND_BY_OUTER_HAIR_CELLS_OF_THE_COCHLEA		24	0.154144	0.881392	0.587669	0.683234	1	8314	tags=96%, list=80%, signal=489%
REACTOME_DEACTIVATION_OF_THE_BETA_CATENIN_TRANSACTIVATING_COMPLEX		32	0.131955	0.879715	0.586538	0.684426	1	3484	tags=47%, list=34%, signal=70%
REACTOME_HIV_TRANSCRIPTION_ELONGATION		36	0.121322	0.862121	0.629921	0.711366	1	7362	tags=83%, list=71%, signal=289%
REACTOME_MRNA_DECAY_BY_3_TO_5_EXORIBONUCLEASE		15	0.187016	0.860796	0.612	0.711775	1	2892	tags=47%, list=28%, signal=65%
REACTOME_SIGNALING_BY_MODERATE_KINASE_ACTIVITY_BRAF_MUTANTS		38	0.118384	0.856453	0.633603	0.717077	1	9115	tags=100%, list=88%, signal=844%
REACTOME_RUNX1_REGULATES_GENES_INVOLVED_IN_MEGAKARYOCYTE_DIFFERENTIATION_AND_PLATELET_FUNCTION		34	0.121684	0.846235	0.639583	0.731978	1	4217	tags=53%, list=41%, signal=89%
REACTOME_EPH_EPHRIN_MEDIATED_REPULSION_OF_CELLS		34	0.122678	0.844781	0.672481	0.732567	1	1775	tags=29%, list=17%, signal=35%
REACTOME_REGULATION_OF_RUNX1_EXPRESSION_AND_ACTIVITY		17	0.171784	0.839717	0.655039	0.739012	1	3698	tags=53%, list=36%, signal=82%
REACTOME_NEGATIVE_REGULATION_OF_FGFR4_SIGNALING		17	0.166819	0.838141	0.643426	0.739811	1	6181	tags=76%, list=60%, signal=190%
REACTOME_NEGATIVE_REGULATION_OF_FGFR2_SIGNALING		17	0.166819	0.837999	0.649087	0.738318	1	6181	tags=76%, list=60%, signal=190%
REACTOME_HSF1_DEPENDENT_TRANSACTIVATION		26	0.13561	0.836144	0.651546	0.739497	1	7346	tags=85%, list=71%, signal=292%
REACTOME_MAP2K_AND_MAPK_ACTIVATION		34	0.118338	0.827288	0.674747	0.751866	1	9115	tags=100%, list=88%, signal=844%
REACTOME_COOPERATION_OF_PDCL_PHLP1_AND_TRIC_CCT_IN_G_PROTEIN_BETA_FOLDING		25	0.137168	0.823198	0.672584	0.756648	1	6026	tags=72%, list=58%, signal=172%
REACTOME_SIGNALING_BY_MET		55	0.0944376	0.821403	0.684848	0.757671	1	3538	tags=44%, list=34%, signal=66%
REACTOME_LISTERIA_MONOCYTOGENES_ENTRY_INTO_HOST_CELLS		16	0.168282	0.809649	0.697395	0.774503	1	3430	tags=50%, list=33%, signal=75%
REACTOME_CELL_CELL_COMMUNICATION		64	0.0862197	0.803049	0.713718	0.78287	1	3635	tags=44%, list=35%, signal=67%
REACTOME_POTENTIAL_THERAPEUTICS_FOR_SARS		69	0.0821327	0.796694	0.745562	0.790928	1	4548	tags=52%, list=44%, signal=93%
REACTOME_INOSITOL_PHOSPHATE_METABOLISM		36	0.111216	0.789504	0.719231	0.800423	1	3734	tags=47%, list=36%, signal=74%
REACTOME_KSRP_KHSRP_BINDS_AND_DESTABILIZES_MRNA		16	0.165762	0.785802	0.765504	0.8043	1	3456	tags=50%, list=33%, signal=75%
REACTOME_TRANSLATION_OF_SARS_COV_1_STRUCTURAL_PROTEINS		26	0.129887	0.781849	0.739394	0.808779	1	3430	tags=46%, list=33%, signal=69%
REACTOME_METABOLISM_OF_PORPHYRINS		17	0.157121	0.773619	0.759369	0.819433	1	6889	tags=82%, list=67%, signal=247%
REACTOME_NEGATIVE_REGULATION_OF_MET_ACTIVITY		17	0.159744	0.770126	0.755187	0.822719	1	6254	tags=76%, list=61%, signal=193%
REACTOME_NEUROTRANSMITTER_RELEASE_CYCLE		25	0.129195	0.765989	0.758687	0.826972	1	2801	tags=40%, list=27%, signal=55%
REACTOME_GLYOXYLATE_METABOLISM_AND_GLYCINE_DEGRADATION		23	0.1342	0.765534	0.765306	0.825791	1	4906	tags=61%, list=47%, signal=116%
REACTOME_REGULATION_OF_PTEN_GENE_TRANSCRIPTION		56	0.0861795	0.754883	0.763265	0.839563	1	3727	tags=45%, list=36%, signal=69%
REACTOME_RAC2_GTPASE_CYCLE		73	0.0745562	0.753018	0.784431	0.840352	1	7870	tags=84%, list=76%, signal=348%
REACTOME_PLATELET_AGGREGATION_PLUG_FORMATION		26	0.124212	0.751678	0.771543	0.840473	1	2296	tags=35%, list=22%, signal=44%
REACTOME_CELL_CELL_JUNCTION_ORGANIZATION		23	0.126729	0.745768	0.776	0.846762	1	3635	tags=48%, list=35%, signal=74%
REACTOME_SIGNALING_BY_NUCLEAR_RECEPTORS		165	0.0498525	0.744833	0.773547	0.846252	1	9138	tags=93%, list=88%, signal=793%
REACTOME_HIV_ELONGATION_ARREST_AND_RECOVERY		27	0.120187	0.7422	0.785156	0.848148	1	7564	tags=85%, list=73%, signal=317%
REACTOME_INTERLEUKIN_RECEPTOR_SHC_SIGNALING		21	0.133674	0.737165	0.782241	0.853271	1	4526	tags=57%, list=44%, signal=101%
REACTOME_SYNTHESIS_OF_PA		20	0.137639	0.732758	0.818763	0.857379	1	3230	tags=45%, list=31%, signal=65%
REACTOME_THROMBOXANE_SIGNALLING_THROUGH_TP_RECEPTOR		15	0.156298	0.729485	0.822449	0.860095	1	5276	tags=67%, list=51%, signal=136%
REACTOME_ATF4_ACTIVATES_GENES_IN_RESPONSE_TO_ENDOPLASMIC_RETICULUM_STRESS		24	0.12283	0.727333	0.814313	0.861145	1	3900	tags=50%, list=38%, signal=80%
REACTOME_REGULATION_OF_TP53_EXPRESSION_AND_DEGRADATION		34	0.102868	0.721801	0.839175	0.866729	1	2587	tags=35%, list=25%, signal=47%
REACTOME_REGULATION_OF_TP53_ACTIVITY_THROUGH_METHYLATION		15	0.152132	0.705885	0.830739	0.885286	1	6008	tags=73%, list=58%, signal=175%
REACTOME_NUCLEOTIDE_SALVAGE		18	0.139333	0.695992	0.859794	0.895865	1	7174	tags=83%, list=69%, signal=272%
REACTOME_NOTCH3_ACTIVATION_AND_TRANSMISSION_OF_SIGNAL_TO_THE_NUCLEUS		20	0.132477	0.688393	0.855422	0.902834	1	7934	tags=90%, list=77%, signal=387%
REACTOME_TRAFFICKING_OF_AMPA_RECEPTORS		18	0.131724	0.684026	0.871429	0.906181	1	8975	tags=100%, list=87%, signal=759%
REACTOME_RHOBTB2_GTPASE_CYCLE		22	0.122242	0.673903	0.90364	0.915773	1	7664	tags=86%, list=74%, signal=333%
REACTOME_OPIOID_SIGNALLING		63	0.0709697	0.670811	0.885057	0.917294	1	6160	tags=67%, list=60%, signal=164%
REACTOME_ACTIVATION_OF_IRF3_IRF7_MEDIATED_BY_TBK1_IKK_EPSILON		15	0.140019	0.665852	0.878968	0.920871	1	5444	tags=67%, list=53%, signal=141%
REACTOME_DOWNREGULATION_OF_ERBB2_SIGNALING		19	0.127038	0.662968	0.900826	0.92203	1	3584	tags=47%, list=35%, signal=72%
REACTOME_TRANSPORT_OF_INORGANIC_CATIONS_ANIONS_AND_AMINO_ACIDS_OLIGOPEPTIDES		59	0.0726673	0.6615	0.901467	0.9217	1	3106	tags=37%, list=30%, signal=53%
REACTOME_BUDDING_AND_MATURATION_OF_HIV_VIRION		21	0.120017	0.660887	0.889121	0.920388	1	8604	tags=95%, list=83%, signal=567%
REACTOME_APOPTOTIC_FACTOR_MEDIATED_RESPONSE		16	0.133843	0.65738	0.889105	0.922267	1	7661	tags=88%, list=74%, signal=338%
REACTOME_G_PROTEIN_MEDIATED_EVENTS		38	0.0866783	0.645945	0.880903	0.932047	1	4002	tags=47%, list=39%, signal=77%
REACTOME_CTLA4_INHIBITORY_SIGNALING		21	0.115197	0.639241	0.908571	0.93664	1	6193	tags=71%, list=60%, signal=178%
REACTOME_RHOH_GTPASE_CYCLE		31	0.0967178	0.633967	0.903543	0.939619	1	4670	tags=55%, list=45%, signal=100%
REACTOME_EFFECTS_OF_PIP2_HYDROLYSIS		20	0.117838	0.631555	0.919679	0.939776	1	6018	tags=70%, list=58%, signal=167%
REACTOME_SIGNALING_BY_FGFR1		32	0.0931768	0.630527	0.902834	0.938638	1	9374	tags=100%, list=91%, signal=1072%
REACTOME_REGULATION_OF_LIPID_METABOLISM_BY_PPARALPHA		99	0.0547118	0.630115	0.908184	0.937042	1	2362	tags=28%, list=23%, signal=36%
REACTOME_EPHB_MEDIATED_FORWARD_SIGNALING		33	0.0930534	0.628896	0.914286	0.936111	1	5304	tags=61%, list=51%, signal=124%
REACTOME_RUNX2_REGULATES_BONE_DEVELOPMENT		19	0.122242	0.621553	0.91954	0.94046	1	8529	tags=95%, list=83%, signal=541%
REACTOME_SUMOYLATION_OF_INTRACELLULAR_RECEPTORS		19	0.121482	0.618359	0.914172	0.94126	1	6905	tags=79%, list=67%, signal=237%
REACTOME_TRANSCRIPTIONAL_REGULATION_OF_WHITE_ADIPOCYTE_DIFFERENTIATION		70	0.0629601	0.615354	0.93797	0.941643	1	5849	tags=63%, list=57%, signal=144%
REACTOME_FORMATION_OF_THE_BETA_CATENIN_TCF_TRANSACTIVATING_COMPLEX		30	0.0924309	0.607968	0.931393	0.945466	1	8348	tags=90%, list=81%, signal=467%
REACTOME_RHOU_GTPASE_CYCLE		28	0.0952127	0.603299	0.942574	0.947186	1	7138	tags=79%, list=69%, signal=253%
REACTOME_ENDOSOMAL_SORTING_COMPLEX_REQUIRED_FOR_TRANSPORT_ESCRT		25	0.099709	0.582702	0.957404	0.959525	1	5172	tags=60%, list=50%, signal=120%
REACTOME_NEPHRIN_FAMILY_INTERACTIONS		16	0.115545	0.553891	0.968504	0.973695	1	5912	tags=69%, list=57%, signal=160%
REACTOME_RHOJ_GTPASE_CYCLE		45	0.0665047	0.536926	0.973684	0.979119	1	5975	tags=64%, list=58%, signal=152%
REACTOME_GENERATION_OF_SECOND_MESSENGER_MOLECULES		19	0.0991561	0.523278	0.988	0.982074	1	64	tags=11%, list=1%, signal=11%

## Sheet: WT_IgM_vs_KO_IgM_REACTOME_neg
NAME	GS DETAILS	SIZE	ES	NES	NOM p-val	FDR q-val	FWER p-val	RANK AT MAX	LEADING EDGE
REACTOME_EUKARYOTIC_TRANSLATION_ELONGATION	Details ...	57	-0.583003	-5.07892	0	0	0	3256	tags=89%, list=32%, signal=130%
REACTOME_RESPONSE_OF_EIF2AK4_GCN2_TO_AMINO_ACID_DEFICIENCY	Details ...	64	-0.497394	-4.62702	0	0	0	2805	tags=77%, list=27%, signal=104%
REACTOME_SELENOAMINO_ACID_METABOLISM	Details ...	75	-0.425107	-4.31987	0	0	0	2805	tags=69%, list=27%, signal=94%
REACTOME_EUKARYOTIC_TRANSLATION_INITIATION	Details ...	80	-0.408185	-4.22593	0	0	0	2662	tags=66%, list=26%, signal=89%
REACTOME_CELLULAR_RESPONSE_TO_STARVATION	Details ...	109	-0.346543	-4.20607	0	0	0	5370	tags=86%, list=52%, signal=178%
REACTOME_RRNA_PROCESSING	Details ...	148	-0.290623	-4.1722	0	0	0	5071	tags=78%, list=49%, signal=150%
REACTOME_SRP_DEPENDENT_COTRANSLATIONAL_PROTEIN_TARGETING_TO_MEMBRANE	Details ...	75	-0.394581	-4.0012	0	0	0	3256	tags=71%, list=32%, signal=102%
REACTOME_NONSENSE_MEDIATED_DECAY_NMD	Details ...	78	-0.375938	-3.91195	0	0	0	3300	tags=69%, list=32%, signal=101%
REACTOME_TRANSLATION	Details ...	243	-0.155495	-2.76309	0	0.000451386	0.005	7746	tags=90%, list=75%, signal=351%
REACTOME_ACTIVATION_OF_THE_MRNA_UPON_BINDING_OF_THE_CAP_BINDING_COMPLEX_AND_EIFS_AND_SUBSEQUENT_BINDING_TO_43S	Details ...	41	-0.355331	-2.74634	0	0.000406247	0.005	5922	tags=93%, list=57%, signal=216%
REACTOME_INFLUENZA_INFECTION	Details ...	110	-0.194394	-2.33799	0	0.0162419	0.189	2805	tags=46%, list=27%, signal=63%
REACTOME_RAB_REGULATION_OF_TRAFFICKING	Details ...	109	-0.188644	-2.2317	0	0.0330295	0.371	4235	tags=60%, list=41%, signal=100%
REACTOME_RRNA_MODIFICATION_IN_THE_NUCLEUS_AND_CYTOSOL	Details ...	51	-0.2589	-2.21972	0.00186916	0.0333216	0.395	5647	tags=80%, list=55%, signal=176%
REACTOME_INSULIN_RECEPTOR_RECYCLING	Details ...	17	-0.426057	-2.13092	0.00201207	0.0551173	0.587	5332	tags=94%, list=52%, signal=194%
REACTOME_REGULATION_OF_CHOLESTEROL_BIOSYNTHESIS_BY_SREBP_SREBF	Details ...	51	-0.252637	-2.1208	0.0020284	0.054698	0.609	3077	tags=55%, list=30%, signal=78%
REACTOME_SYNTHESIS_OF_PIPS_AT_THE_EARLY_ENDOSOME_MEMBRANE	Details ...	16	-0.439311	-2.06756	0.00203666	0.0729697	0.755	3219	tags=75%, list=31%, signal=109%
REACTOME_ANTIGEN_ACTIVATES_B_CELL_RECEPTOR_BCR_LEADING_TO_GENERATION_OF_SECOND_MESSENGERS	Details ...	29	-0.319165	-2.05976	0.00214592	0.0720358	0.776	1701	tags=48%, list=16%, signal=58%
REACTOME_AMINO_ACIDS_REGULATE_MTORC1	Details ...	45	-0.25941	-2.05771	0.00203252	0.0688046	0.783	5370	tags=78%, list=52%, signal=161%
REACTOME_SPHINGOLIPID_DE_NOVO_BIOSYNTHESIS	Details ...	32	-0.305384	-2.03688	0.00372439	0.0748015	0.822	3314	tags=63%, list=32%, signal=92%
REACTOME_RETROGRADE_TRANSPORT_AT_THE_TRANS_GOLGI_NETWORK	Details ...	45	-0.256398	-2.03015	0.00583658	0.0741477	0.839	6090	tags=84%, list=59%, signal=205%
REACTOME_RAB_GERANYLGERANYLATION		48	-0.243645	-1.99613	0.00621118	0.0855058	0.885	3954	tags=63%, list=38%, signal=101%
REACTOME_SIGNALING_BY_INSULIN_RECEPTOR		47	-0.246809	-1.98987	0.003861	0.0843736	0.894	5378	tags=77%, list=52%, signal=159%
REACTOME_SPHINGOLIPID_METABOLISM		64	-0.212002	-1.98168	0.00386847	0.0842485	0.902	3314	tags=53%, list=32%, signal=78%
REACTOME_PI_METABOLISM		75	-0.189903	-1.98122	0.00992064	0.0809076	0.903	3289	tags=51%, list=32%, signal=74%
REACTOME_TRNA_MODIFICATION_IN_THE_NUCLEUS_AND_CYTOSOL		38	-0.261446	-1.95484	0.00585938	0.0914491	0.937	6556	tags=89%, list=63%, signal=244%
REACTOME_CHOLESTEROL_BIOSYNTHESIS		23	-0.339436	-1.95224	0.00603622	0.0895094	0.94	4589	tags=78%, list=44%, signal=140%
REACTOME_CONSTITUTIVE_SIGNALING_BY_AKT1_E17K_IN_CANCER		23	-0.342379	-1.94748	0.00572519	0.0881862	0.943	5008	tags=83%, list=48%, signal=160%
REACTOME_HS_GAG_BIOSYNTHESIS		17	-0.386737	-1.91764	0.0165289	0.100841	0.97	2698	tags=65%, list=26%, signal=87%
REACTOME_CYTOSOLIC_TRNA_AMINOACYLATION		22	-0.341555	-1.90142	0.00400802	0.106611	0.98	5874	tags=91%, list=57%, signal=210%
REACTOME_PROTEIN_LOCALIZATION		131	-0.14335	-1.89445	0.0077821	0.107554	0.984	8321	tags=95%, list=81%, signal=480%
REACTOME_TBC_RABGAPS		39	-0.261267	-1.88956	0.0160966	0.106836	0.985	4201	tags=67%, list=41%, signal=112%
REACTOME_REGULATION_OF_EXPRESSION_OF_SLITS_AND_ROBOS		121	-0.148036	-1.88577	0.00595238	0.105807	0.986	7799	tags=90%, list=75%, signal=363%
REACTOME_NOD1_2_SIGNALING_PATHWAY		32	-0.284908	-1.88152	0.0093633	0.104797	0.988	3202	tags=59%, list=31%, signal=86%
REACTOME_SIGNALING_BY_THE_B_CELL_RECEPTOR_BCR		102	-0.158711	-1.87619	0.0156556	0.104739	0.991	7800	tags=91%, list=75%, signal=368%
REACTOME_ACTIVATION_OF_GENE_EXPRESSION_BY_SREBF_SREBP		40	-0.253351	-1.85933	0.012024	0.112077	0.991	3077	tags=55%, list=30%, signal=78%
REACTOME_METABOLISM_OF_STEROIDS		92	-0.165207	-1.84779	0.00816326	0.115761	0.994	5049	tags=65%, list=49%, signal=126%
REACTOME_FOXO_MEDIATED_TRANSCRIPTION		50	-0.219601	-1.8469	0.0135922	0.113188	0.995	3530	tags=56%, list=34%, signal=85%
REACTOME_SYNTHESIS_OF_PIPS_AT_THE_PLASMA_MEMBRANE		48	-0.232891	-1.84225	0.0207039	0.113205	0.995	3634	tags=58%, list=35%, signal=90%
REACTOME_UB_SPECIFIC_PROCESSING_PROTEASES		147	-0.129901	-1.83716	0.0144928	0.113416	0.996	7044	tags=81%, list=68%, signal=251%
REACTOME_SIGNALING_BY_ROBO_RECEPTORS		155	-0.125318	-1.81519	0.0117417	0.124696	0.997	3326	tags=45%, list=32%, signal=65%
REACTOME_TRANSCRIPTIONAL_ACTIVATION_OF_MITOCHONDRIAL_BIOGENESIS		50	-0.210909	-1.80141	0.0212355	0.13149	0.997	5273	tags=72%, list=51%, signal=146%
REACTOME_DOWNSTREAM_SIGNALING_EVENTS_OF_B_CELL_RECEPTOR_BCR		74	-0.179095	-1.78901	0.0145228	0.136815	0.999	7800	tags=93%, list=75%, signal=377%
REACTOME_HEME_SIGNALING		39	-0.239316	-1.7848	0.0186335	0.136412	0.999	6017	tags=82%, list=58%, signal=196%
REACTOME_TNF_SIGNALING		41	-0.229333	-1.77251	0.0247934	0.142385	1	3690	tags=59%, list=36%, signal=91%
REACTOME_ASPARAGINE_N_LINKED_GLYCOSYLATION		240	-0.100136	-1.76592	0.0213178	0.144061	1	7861	tags=86%, list=76%, signal=350%
REACTOME_FCERI_MEDIATED_CA_2_MOBILIZATION		30	-0.273556	-1.76513	0.0238095	0.141616	1	627	tags=33%, list=6%, signal=35%
REACTOME_TRNA_AMINOACYLATION		40	-0.239558	-1.76512	0.0141988	0.138603	1	7353	tags=95%, list=71%, signal=328%
REACTOME_SIGNALING_BY_NTRKS		106	-0.144882	-1.75694	0.0151803	0.141692	1	5929	tags=72%, list=57%, signal=166%
REACTOME_GOLGI_ASSOCIATED_VESICLE_BIOGENESIS		52	-0.207794	-1.75112	0.0222222	0.142888	1	3628	tags=56%, list=35%, signal=86%
REACTOME_HEPARAN_SULFATE_HEPARIN_HS_GAG_METABOLISM		34	-0.248862	-1.72523	0.0232108	0.160557	1	2301	tags=47%, list=22%, signal=60%
REACTOME_SIGNALING_BY_CTNNB1_PHOSPHO_SITE_MUTANTS		15	-0.367733	-1.7232	0.0185567	0.15912	1	5852	tags=93%, list=57%, signal=215%
REACTOME_INTERLEUKIN_2_FAMILY_SIGNALING		35	-0.247739	-1.72201	0.0244399	0.156707	1	1288	tags=37%, list=12%, signal=42%
REACTOME_COPII_MEDIATED_VESICLE_TRANSPORT		56	-0.192876	-1.70356	0.0140845	0.168712	1	6877	tags=86%, list=67%, signal=255%
REACTOME_DOWNSTREAM_SIGNAL_TRANSDUCTION		26	-0.27733	-1.69946	0.0340681	0.168954	1	1912	tags=46%, list=19%, signal=56%
REACTOME_FC_EPSILON_RECEPTOR_FCERI_SIGNALING		123	-0.132386	-1.69798	0.0229008	0.167068	1	8732	tags=98%, list=84%, signal=622%
REACTOME_FLT3_SIGNALING		34	-0.247988	-1.69366	0.0303644	0.168026	1	2310	tags=47%, list=22%, signal=60%
REACTOME_METABOLISM_OF_LIPIDS		496	-0.0669901	-1.69157	0.0254902	0.166769	1	3155	tags=37%, list=31%, signal=51%
REACTOME_CYTOPROTECTION_BY_HMOX1		110	-0.137137	-1.68824	0.0159363	0.166577	1	8464	tags=95%, list=82%, signal=522%
REACTOME_DEUBIQUITINATION		216	-0.0983628	-1.68801	0.0303605	0.164025	1	7044	tags=78%, list=68%, signal=239%
REACTOME_RAB_GEFS_EXCHANGE_GTP_FOR_GDP_ON_RABS		81	-0.159475	-1.68296	0.022	0.16548	1	4235	tags=57%, list=41%, signal=95%
REACTOME_SIGNALLING_TO_ERKS		28	-0.266961	-1.67837	0.039604	0.1666	1	6108	tags=86%, list=59%, signal=209%
REACTOME_INTERFERON_ALPHA_BETA_SIGNALING		44	-0.205952	-1.66988	0.0328542	0.171498	1	7277	tags=91%, list=70%, signal=306%
REACTOME_INTERLEUKIN_20_FAMILY_SIGNALING		16	-0.339513	-1.65623	0.0299786	0.180552	1	2311	tags=56%, list=22%, signal=72%
REACTOME_TRANSCRIPTIONAL_ACTIVITY_OF_SMAD2_SMAD3_SMAD4_HETEROTRIMER		40	-0.221394	-1.64254	0.0297619	0.189169	1	3406	tags=55%, list=33%, signal=82%
REACTOME_HDMS_DEMETHYLATE_HISTONES		21	-0.30674	-1.63027	0.0279441	0.197434	1	2743	tags=57%, list=27%, signal=78%
REACTOME_NUCLEAR_EVENTS_KINASE_AND_TRANSCRIPTION_FACTOR_ACTIVATION		53	-0.186345	-1.62454	0.0278884	0.200461	1	5885	tags=75%, list=57%, signal=174%
REACTOME_ZINC_TRANSPORTERS		16	-0.334468	-1.62234	0.0376238	0.199611	1	3009	tags=63%, list=29%, signal=88%
REACTOME_TRANS_GOLGI_NETWORK_VESICLE_BUDDING		65	-0.173223	-1.62098	0.0396825	0.197854	1	3628	tags=52%, list=35%, signal=80%
REACTOME_METABOLISM_OF_WATER_SOLUBLE_VITAMINS_AND_COFACTORS		90	-0.145762	-1.62096	0.0413223	0.195022	1	6546	tags=78%, list=63%, signal=210%
REACTOME_RHO_GTPASES_ACTIVATE_WASPS_AND_WAVES		32	-0.241526	-1.6186	0.0471513	0.1943	1	3326	tags=56%, list=32%, signal=83%
REACTOME_INTERLEUKIN_17_SIGNALING		62	-0.17365	-1.61368	0.0418327	0.196031	1	5885	tags=74%, list=57%, signal=171%
REACTOME_NEDDYLATION		187	-0.102881	-1.6053	0.0401606	0.201044	1	7026	tags=78%, list=68%, signal=239%
REACTOME_SIGNALING_BY_ERYTHROPOIETIN		23	-0.284084	-1.60388	0.0466531	0.199557	1	1565	tags=43%, list=15%, signal=51%
REACTOME_CD28_CO_STIMULATION		30	-0.246531	-1.5986	0.054717	0.202119	1	2628	tags=50%, list=25%, signal=67%
REACTOME_COSTIMULATION_BY_THE_CD28_FAMILY		54	-0.183461	-1.59125	0.0393701	0.206172	1	2134	tags=39%, list=21%, signal=49%
REACTOME_TICAM1_RIP1_MEDIATED_IKK_COMPLEX_RECRUITMENT		16	-0.326624	-1.58492	0.0479167	0.209521	1	2444	tags=56%, list=24%, signal=74%
REACTOME_FOXO_MEDIATED_TRANSCRIPTION_OF_OXIDATIVE_STRESS_METABOLIC_AND_NEURONAL_GENES		19	-0.302887	-1.57408	0.0433071	0.218232	1	1228	tags=42%, list=12%, signal=48%
REACTOME_MEMBRANE_TRAFFICKING		497	-0.0612733	-1.55975	0.0711382	0.229808	1	7321	tags=77%, list=71%, signal=250%
REACTOME_INACTIVATION_OF_CSF3_G_CSF_SIGNALING		19	-0.300657	-1.55812	0.0628684	0.228546	1	1251	tags=42%, list=12%, signal=48%
REACTOME_TRANSFERRIN_ENDOCYTOSIS_AND_RECYCLING		21	-0.283554	-1.54147	0.0520833	0.244419	1	5935	tags=86%, list=57%, signal=201%
REACTOME_HATS_ACETYLATE_HISTONES		74	-0.151418	-1.53812	0.06	0.245372	1	7665	tags=89%, list=74%, signal=343%
REACTOME_INTERFERON_GAMMA_SIGNALING		59	-0.170054	-1.53502	0.0650888	0.246151	1	7012	tags=85%, list=68%, signal=262%
REACTOME_MITOCHONDRIAL_BIOGENESIS		79	-0.150323	-1.53005	0.0566406	0.248541	1	8271	tags=95%, list=80%, signal=472%
REACTOME_CLASS_I_MHC_MEDIATED_ANTIGEN_PROCESSING_PRESENTATION		302	-0.0759622	-1.5257	0.0594059	0.25026	1	7897	tags=84%, list=76%, signal=345%
REACTOME_SIGNALING_BY_CSF3_G_CSF		24	-0.265954	-1.51857	0.0687623	0.255403	1	1565	tags=42%, list=15%, signal=49%
REACTOME_DISEASES_OF_IMMUNE_SYSTEM		25	-0.255383	-1.51788	0.0604288	0.25337	1	1502	tags=40%, list=15%, signal=47%
REACTOME_ANTIGEN_PRESENTATION_FOLDING_ASSEMBLY_AND_PEPTIDE_LOADING_OF_CLASS_I_MHC		17	-0.301518	-1.517	0.0677291	0.25135	1	6617	tags=94%, list=64%, signal=261%
REACTOME_METABOLISM_OF_VITAMINS_AND_COFACTORS		126	-0.114183	-1.51507	0.0778443	0.250705	1	8104	tags=90%, list=78%, signal=410%
REACTOME_REGULATION_OF_SIGNALING_BY_CBL		20	-0.275788	-1.51122	0.0732673	0.252301	1	1807	tags=45%, list=17%, signal=54%
REACTOME_SIGNALING_BY_PDGF		33	-0.217407	-1.50327	0.0609756	0.258156	1	2459	tags=45%, list=24%, signal=59%
REACTOME_PHOSPHOLIPID_METABOLISM		152	-0.104447	-1.49673	0.0737705	0.263063	1	3289	tags=42%, list=32%, signal=61%
REACTOME_SIGNALING_BY_WNT_IN_CANCER		27	-0.249332	-1.49177	0.0777096	0.266056	1	5852	tags=81%, list=57%, signal=187%
REACTOME_METABOLISM_OF_AMINO_ACIDS_AND_DERIVATIVES		242	-0.0818451	-1.48906	0.0714286	0.266532	1	2805	tags=35%, list=27%, signal=47%
REACTOME_BETA_CATENIN_PHOSPHORYLATION_CASCADE		16	-0.309344	-1.48657	0.0866935	0.266581	1	5852	tags=88%, list=57%, signal=201%
REACTOME_PEROXISOMAL_PROTEIN_IMPORT		47	-0.184497	-1.4523	0.101075	0.306472	1	8218	tags=98%, list=80%, signal=476%
REACTOME_MAPK_TARGETS_NUCLEAR_EVENTS_MEDIATED_BY_MAP_KINASES		29	-0.224406	-1.44565	0.086	0.312105	1	5885	tags=79%, list=57%, signal=184%
REACTOME_PHASE_I_FUNCTIONALIZATION_OF_COMPOUNDS		36	-0.204106	-1.4386	0.103659	0.318375	1	5076	tags=69%, list=49%, signal=136%
REACTOME_NGF_STIMULATED_TRANSCRIPTION		32	-0.214234	-1.43627	0.0818363	0.318288	1	5545	tags=75%, list=54%, signal=161%
REACTOME_INTERLEUKIN_3_INTERLEUKIN_5_AND_GM_CSF_SIGNALING		41	-0.186997	-1.41337	0.0921844	0.346926	1	1353	tags=32%, list=13%, signal=36%
REACTOME_RNA_POLYMERASE_III_TRANSCRIPTION_INITIATION_FROM_TYPE_3_PROMOTER		25	-0.236275	-1.41323	0.122568	0.343695	1	7900	tags=100%, list=76%, signal=423%
REACTOME_GLYCOSAMINOGLYCAN_METABOLISM		80	-0.136756	-1.41096	0.109533	0.343268	1	2345	tags=36%, list=23%, signal=47%
REACTOME_RHO_GTPASES_ACTIVATE_PKNS		27	-0.226469	-1.40408	0.103516	0.350048	1	3791	tags=59%, list=37%, signal=93%
REACTOME_ANTIGEN_PROCESSING_UBIQUITINATION_PROTEASOME_DEGRADATION		251	-0.0785391	-1.40173	0.109312	0.350114	1	7897	tags=84%, list=76%, signal=348%
REACTOME_SMAD2_SMAD3_SMAD4_HETEROTRIMER_REGULATES_TRANSCRIPTION		29	-0.214261	-1.38036	0.101031	0.37866	1	1713	tags=38%, list=17%, signal=45%
REACTOME_TRANSPORT_TO_THE_GOLGI_AND_SUBSEQUENT_MODIFICATION		143	-0.0978843	-1.37158	0.112381	0.388474	1	5002	tags=58%, list=48%, signal=111%
REACTOME_CIRCADIAN_CLOCK		57	-0.156174	-1.36988	0.11976	0.387381	1	7099	tags=84%, list=69%, signal=267%
REACTOME_ESTROGEN_DEPENDENT_NUCLEAR_EVENTS_DOWNSTREAM_OF_ESR_MEMBRANE_SIGNALING		16	-0.284475	-1.36942	0.120968	0.384504	1	2233	tags=50%, list=22%, signal=64%
REACTOME_SIGNALING_BY_NOTCH4		73	-0.136854	-1.36786	0.110887	0.383237	1	7799	tags=89%, list=75%, signal=360%
REACTOME_TCR_SIGNALING		97	-0.116934	-1.36757	0.11501	0.380179	1	8393	tags=93%, list=81%, signal=489%
REACTOME_DOWNREGULATION_OF_SMAD2_3_SMAD4_TRANSCRIPTIONAL_ACTIVITY		21	-0.255007	-1.36676	0.130841	0.378006	1	1308	tags=38%, list=13%, signal=44%
REACTOME_SYNTHESIS_OF_PIPS_AT_THE_GOLGI_MEMBRANE		15	-0.289244	-1.36408	0.126233	0.378591	1	3906	tags=67%, list=38%, signal=107%
REACTOME_REGULATION_OF_BETA_CELL_DEVELOPMENT		17	-0.268611	-1.36204	0.130178	0.378567	1	2093	tags=47%, list=20%, signal=59%
REACTOME_METAL_ION_SLC_TRANSPORTERS		23	-0.231204	-1.35588	0.138402	0.384648	1	3009	tags=52%, list=29%, signal=73%
REACTOME_TP53_REGULATES_METABOLIC_GENES		81	-0.129705	-1.35503	0.120902	0.382721	1	2116	tags=33%, list=20%, signal=42%
REACTOME_GENE_AND_PROTEIN_EXPRESSION_BY_JAK_STAT_SIGNALING_AFTER_INTERLEUKIN_12_STIMULATION		29	-0.20792	-1.34896	0.110442	0.388386	1	4273	tags=62%, list=41%, signal=106%
REACTOME_FCERI_MEDIATED_MAPK_ACTIVATION		30	-0.205192	-1.34779	0.12549	0.386815	1	5121	tags=70%, list=50%, signal=138%
REACTOME_CHONDROITIN_SULFATE_DERMATAN_SULFATE_METABOLISM		34	-0.194182	-1.34499	0.118217	0.387939	1	5600	tags=74%, list=54%, signal=160%
REACTOME_MTORC1_MEDIATED_SIGNALLING		23	-0.235251	-1.33828	0.150391	0.394689	1	5214	tags=74%, list=50%, signal=149%
REACTOME_CHROMATIN_MODIFYING_ENZYMES		185	-0.0826441	-1.33238	0.129167	0.400314	1	8324	tags=89%, list=81%, signal=447%
REACTOME_G_ALPHA_I_SIGNALLING_EVENTS		127	-0.10179	-1.33184	0.130346	0.397956	1	915	tags=19%, list=9%, signal=20%
REACTOME_SIGNALING_BY_KIT_IN_DISEASE		19	-0.25073	-1.3316	0.123711	0.395076	1	2310	tags=47%, list=22%, signal=61%
REACTOME_PRE_NOTCH_EXPRESSION_AND_PROCESSING		46	-0.164785	-1.32801	0.147239	0.397108	1	2799	tags=43%, list=27%, signal=59%
REACTOME_FCERI_MEDIATED_NF_KB_ACTIVATION		74	-0.129098	-1.3255	0.14053	0.397796	1	8732	tags=97%, list=84%, signal=623%
REACTOME_ER_TO_GOLGI_ANTEROGRADE_TRANSPORT		121	-0.102849	-1.32408	0.146154	0.396768	1	7321	tags=81%, list=71%, signal=274%
REACTOME_MTOR_SIGNALLING		38	-0.177558	-1.32099	0.159574	0.39868	1	5244	tags=68%, list=51%, signal=138%
REACTOME_RNA_POLYMERASE_III_TRANSCRIPTION		37	-0.182303	-1.31499	0.161793	0.404707	1	7900	tags=95%, list=76%, signal=400%
REACTOME_DEATH_RECEPTOR_SIGNALLING		117	-0.105924	-1.31437	0.145791	0.402377	1	3777	tags=47%, list=37%, signal=73%
REACTOME_VEGFR2_MEDIATED_VASCULAR_PERMEABILITY		24	-0.228288	-1.31417	0.146825	0.399521	1	2384	tags=46%, list=23%, signal=59%
REACTOME_PEROXISOMAL_LIPID_METABOLISM		25	-0.219224	-1.3026	0.173913	0.414225	1	7249	tags=92%, list=70%, signal=307%
REACTOME_BBSOME_MEDIATED_CARGO_TARGETING_TO_CILIUM		19	-0.249827	-1.29602	0.157447	0.421661	1	5583	tags=79%, list=54%, signal=171%
REACTOME_SIGNALING_BY_VEGF		92	-0.116417	-1.29509	0.176955	0.419845	1	2628	tags=37%, list=25%, signal=49%
REACTOME_REGULATION_OF_MECP2_EXPRESSION_AND_ACTIVITY		28	-0.206423	-1.29068	0.183128	0.423852	1	3410	tags=54%, list=33%, signal=80%
REACTOME_DISEASES_OF_SIGNAL_TRANSDUCTION_BY_GROWTH_FACTOR_RECEPTORS_AND_SECOND_MESSENGERS		311	-0.0621091	-1.28517	0.152305	0.4297	1	8218	tags=86%, list=80%, signal=405%
REACTOME_PRE_NOTCH_PROCESSING_IN_GOLGI		16	-0.262574	-1.28282	0.171598	0.430425	1	2459	tags=50%, list=24%, signal=66%
REACTOME_FORMATION_OF_TC_NER_PRE_INCISION_COMPLEX		48	-0.157675	-1.28205	0.155419	0.428451	1	8714	tags=100%, list=84%, signal=635%
REACTOME_N_GLYCAN_TRIMMING_IN_THE_ER_AND_CALNEXIN_CALRETICULIN_CYCLE		33	-0.181871	-1.27762	0.171154	0.432191	1	7836	tags=94%, list=76%, signal=387%
REACTOME_GAMMA_CARBOXYLATION_HYPUSINE_FORMATION_AND_ARYLSULFATASE_ACTIVATION		29	-0.201212	-1.27759	0.206897	0.429072	1	3273	tags=52%, list=32%, signal=75%
REACTOME_SIGNALING_BY_RECEPTOR_TYROSINE_KINASES		342	-0.0613552	-1.27335	0.155556	0.433231	1	2712	tags=32%, list=26%, signal=42%
REACTOME_CYTOSOLIC_SENSORS_OF_PATHOGEN_ASSOCIATED_DNA		55	-0.145552	-1.27218	0.175803	0.431888	1	8276	tags=95%, list=80%, signal=472%
REACTOME_HS_GAG_DEGRADATION		16	-0.271732	-1.26602	0.17505	0.438518	1	7532	tags=100%, list=73%, signal=368%
REACTOME_RNA_POLYMERASE_I_TRANSCRIPTION_TERMINATION		26	-0.202105	-1.26115	0.162698	0.443555	1	7855	tags=96%, list=76%, signal=400%
REACTOME_A_TETRASACCHARIDE_LINKER_SEQUENCE_IS_REQUIRED_FOR_GAG_SYNTHESIS		15	-0.272771	-1.25382	0.188017	0.45261	1	2698	tags=53%, list=26%, signal=72%
REACTOME_DISEASES_ASSOCIATED_WITH_GLYCOSAMINOGLYCAN_METABOLISM		23	-0.217788	-1.25364	0.211268	0.449724	1	2698	tags=48%, list=26%, signal=65%
REACTOME_RNA_POLYMERASE_I_PROMOTER_ESCAPE		27	-0.203553	-1.25248	0.178926	0.448501	1	7855	tags=96%, list=76%, signal=400%
REACTOME_MYD88_INDEPENDENT_TLR4_CASCADE		87	-0.111527	-1.24756	0.189555	0.453375	1	6936	tags=78%, list=67%, signal=236%
REACTOME_INSULIN_RECEPTOR_SIGNALLING_CASCADE		31	-0.187387	-1.24721	0.189189	0.450742	1	7405	tags=90%, list=72%, signal=318%
REACTOME_SYNTHESIS_OF_BILE_ACIDS_AND_BILE_SALTS		15	-0.265795	-1.24342	0.193738	0.453849	1	6215	tags=87%, list=60%, signal=217%
REACTOME_ENERGY_DEPENDENT_REGULATION_OF_MTOR_BY_LKB1_AMPK		27	-0.196913	-1.23883	0.192157	0.458323	1	5244	tags=70%, list=51%, signal=142%
REACTOME_RNA_POLYMERASE_III_TRANSCRIPTION_INITIATION_FROM_TYPE_1_PROMOTER		25	-0.205548	-1.23802	0.208068	0.456446	1	7390	tags=92%, list=72%, signal=322%
REACTOME_JNK_C_JUN_KINASES_PHOSPHORYLATION_AND_ACTIVATION_MEDIATED_BY_ACTIVATED_HUMAN_TAK1		19	-0.23347	-1.23049	0.222222	0.465688	1	3032	tags=53%, list=29%, signal=74%
REACTOME_IRS_MEDIATED_SIGNALLING		27	-0.198594	-1.22926	0.216165	0.464727	1	2930	tags=48%, list=28%, signal=67%
REACTOME_RNA_POLYMERASE_I_TRANSCRIPTION		46	-0.153786	-1.22227	0.206166	0.47331	1	7855	tags=91%, list=76%, signal=379%
REACTOME_MISCELLANEOUS_TRANSPORT_AND_BINDING_EVENTS		15	-0.253973	-1.21511	0.225549	0.481786	1	2203	tags=47%, list=21%, signal=59%
REACTOME_PINK1_PRKN_MEDIATED_MITOPHAGY		18	-0.230542	-1.21097	0.228	0.485624	1	2790	tags=50%, list=27%, signal=68%
REACTOME_CLATHRIN_MEDIATED_ENDOCYTOSIS		104	-0.101994	-1.20673	0.217842	0.489666	1	7305	tags=81%, list=71%, signal=273%
REACTOME_SIGNALING_BY_TGF_BETA_RECEPTOR_COMPLEX		65	-0.12444	-1.20568	0.196755	0.488207	1	3493	tags=46%, list=34%, signal=69%
REACTOME_DARPP_32_EVENTS		20	-0.225618	-1.2025	0.245833	0.490523	1	1291	tags=35%, list=12%, signal=40%
REACTOME_TRANSCRIPTIONAL_REGULATION_BY_MECP2		41	-0.158584	-1.20061	0.22332	0.490699	1	3410	tags=49%, list=33%, signal=73%
REACTOME_SIALIC_ACID_METABOLISM		22	-0.215765	-1.19779	0.230769	0.492221	1	1534	tags=36%, list=15%, signal=43%
REACTOME_BMAL1_CLOCK_NPAS2_ACTIVATES_CIRCADIAN_GENE_EXPRESSION		20	-0.224479	-1.19592	0.248031	0.492388	1	4920	tags=70%, list=48%, signal=133%
REACTOME_SIGNALLING_TO_RAS		15	-0.249031	-1.19121	0.231884	0.497548	1	1565	tags=40%, list=15%, signal=47%
REACTOME_NR1H2_AND_NR1H3_MEDIATED_SIGNALING		34	-0.170712	-1.18713	0.218295	0.501512	1	3410	tags=50%, list=33%, signal=74%
REACTOME_CD28_DEPENDENT_PI3K_AKT_SIGNALING		20	-0.21985	-1.1819	0.224568	0.507693	1	2384	tags=45%, list=23%, signal=58%
REACTOME_CREB1_PHOSPHORYLATION_THROUGH_NMDA_RECEPTOR_MEDIATED_ACTIVATION_OF_RAS_SIGNALING		19	-0.218144	-1.17668	0.237354	0.513852	1	4278	tags=63%, list=41%, signal=108%
REACTOME_REGULATION_OF_TNFR1_SIGNALING		32	-0.174849	-1.17635	0.257426	0.511322	1	3690	tags=53%, list=36%, signal=82%
REACTOME_LDL_CLEARANCE		16	-0.238504	-1.17357	0.251559	0.512837	1	6583	tags=88%, list=64%, signal=241%
REACTOME_INTRACELLULAR_SIGNALING_BY_SECOND_MESSENGERS		239	-0.0653505	-1.16818	0.248	0.519296	1	8033	tags=84%, list=78%, signal=369%
REACTOME_RNA_POLYMERASE_I_TRANSCRIPTION_INITIATION		43	-0.147649	-1.16371	0.257485	0.5241	1	7855	tags=91%, list=76%, signal=376%
REACTOME_RAF_ACTIVATION		32	-0.171522	-1.16308	0.255489	0.522085	1	6631	tags=81%, list=64%, signal=226%
REACTOME_SIGNALING_BY_NOTCH2		27	-0.191469	-1.16249	0.284823	0.520058	1	324	tags=22%, list=3%, signal=23%
REACTOME_SYNTHESIS_OF_GLYCOSYLPHOSPHATIDYLINOSITOL_GPI		17	-0.237677	-1.16064	0.271287	0.520286	1	4236	tags=65%, list=41%, signal=109%
REACTOME_MRNA_DECAY_BY_5_TO_3_EXORIBONUCLEASE		15	-0.247674	-1.1571	0.267347	0.523437	1	7091	tags=93%, list=69%, signal=297%
REACTOME_INTERLEUKIN_1_SIGNALING		93	-0.102906	-1.15687	0.259921	0.520841	1	8393	tags=91%, list=81%, signal=482%
REACTOME_INTERLEUKIN_12_FAMILY_SIGNALING		43	-0.145392	-1.15345	0.270161	0.524015	1	4273	tags=56%, list=41%, signal=95%
REACTOME_TOLL_LIKE_RECEPTOR_CASCADES		128	-0.0878801	-1.13986	0.269388	0.545261	1	6936	tags=76%, list=67%, signal=228%
REACTOME_SYNTHESIS_OF_PC		18	-0.222578	-1.13587	0.269397	0.549718	1	2298	tags=44%, list=22%, signal=57%
REACTOME_SIGNALING_BY_ERBB2_IN_CANCER		17	-0.22786	-1.13453	0.279612	0.548919	1	7377	tags=94%, list=71%, signal=328%
REACTOME_CLEC7A_DECTIN_1_SIGNALING		92	-0.103321	-1.12751	0.3125	0.558621	1	8716	tags=95%, list=84%, signal=598%
REACTOME_ROS_AND_RNS_PRODUCTION_IN_PHAGOCYTES		24	-0.192961	-1.1245	0.307992	0.561184	1	5332	tags=71%, list=52%, signal=146%
REACTOME_MATURATION_OF_SARS_COV_2_SPIKE_PROTEIN		26	-0.182413	-1.12336	0.302913	0.560149	1	7263	tags=88%, list=70%, signal=297%
REACTOME_RNA_POLYMERASE_III_CHAIN_ELONGATION		15	-0.240407	-1.12287	0.304167	0.557922	1	7855	tags=100%, list=76%, signal=416%
REACTOME_B_WICH_COMPLEX_POSITIVELY_REGULATES_RRNA_EXPRESSION		29	-0.176399	-1.12002	0.301741	0.560135	1	5667	tags=72%, list=55%, signal=160%
REACTOME_ROLE_OF_LAT2_NTAL_LAB_ON_CALCIUM_MOBILIZATION		15	-0.236434	-1.11867	0.291913	0.559418	1	2384	tags=47%, list=23%, signal=61%
REACTOME_BILE_ACID_AND_BILE_SALT_METABOLISM		17	-0.225266	-1.11567	0.298539	0.561767	1	4972	tags=71%, list=48%, signal=136%
REACTOME_DEFECTS_IN_VITAMIN_AND_COFACTOR_METABOLISM		19	-0.215016	-1.11304	0.306613	0.563369	1	7030	tags=89%, list=68%, signal=279%
REACTOME_BIOLOGICAL_OXIDATIONS		84	-0.105042	-1.11297	0.300589	0.560453	1	5076	tags=60%, list=49%, signal=116%
REACTOME_RHOD_GTPASE_CYCLE		40	-0.147608	-1.11209	0.314672	0.55908	1	4424	tags=58%, list=43%, signal=100%
REACTOME_TOLL_LIKE_RECEPTOR_9_TLR9_CASCADE		84	-0.104854	-1.10667	0.30303	0.565915	1	5324	tags=62%, list=52%, signal=127%
REACTOME_DEADENYLATION_OF_MRNA		21	-0.203898	-1.1034	0.31746	0.568833	1	8233	tags=100%, list=80%, signal=491%
REACTOME_O_LINKED_GLYCOSYLATION_OF_MUCINS		29	-0.171577	-1.10209	0.346856	0.568278	1	371	tags=21%, list=4%, signal=21%
REACTOME_SARS_COV_2_INFECTION		56	-0.128494	-1.10181	0.320236	0.565796	1	8277	tags=93%, list=80%, signal=464%
REACTOME_KERATAN_SULFATE_KERATIN_METABOLISM		21	-0.199521	-1.09989	0.313278	0.566318	1	896	tags=29%, list=9%, signal=31%
REACTOME_FGFR1_MUTANT_RECEPTOR_ACTIVATION		21	-0.196058	-1.09607	0.345382	0.570205	1	1916	tags=38%, list=19%, signal=47%
REACTOME_SIGNALING_BY_FGFR1_IN_DISEASE		28	-0.172317	-1.09498	0.331276	0.569383	1	1916	tags=36%, list=19%, signal=44%
REACTOME_BRANCHED_CHAIN_AMINO_ACID_CATABOLISM		21	-0.201058	-1.08675	0.345055	0.581502	1	7278	tags=90%, list=70%, signal=305%
REACTOME_METABOLISM_OF_FAT_SOLUBLE_VITAMINS		21	-0.194922	-1.08108	0.346076	0.589157	1	6357	tags=81%, list=62%, signal=210%
REACTOME_GROWTH_HORMONE_RECEPTOR_SIGNALING		18	-0.212756	-1.07898	0.349515	0.590178	1	1251	tags=33%, list=12%, signal=38%
REACTOME_DEADENYLATION_DEPENDENT_MRNA_DECAY		51	-0.125672	-1.07457	0.349206	0.595191	1	8233	tags=92%, list=80%, signal=451%
REACTOME_ERK_MAPK_TARGETS		21	-0.196169	-1.07113	0.353818	0.598702	1	5852	tags=76%, list=57%, signal=175%
REACTOME_SIGNALING_BY_SCF_KIT		37	-0.150116	-1.06808	0.339545	0.601198	1	1807	tags=32%, list=17%, signal=39%
REACTOME_MITOCHONDRIAL_TRNA_AMINOACYLATION		21	-0.193787	-1.06615	0.374	0.602018	1	7353	tags=90%, list=71%, signal=313%
REACTOME_NUCLEAR_SIGNALING_BY_ERBB4		19	-0.199139	-1.05577	0.385375	0.618172	1	5018	tags=68%, list=49%, signal=133%
REACTOME_CALNEXIN_CALRETICULIN_CYCLE		24	-0.180487	-1.05413	0.365422	0.61808	1	8475	tags=100%, list=82%, signal=554%
REACTOME_ASSOCIATION_OF_TRIC_CCT_WITH_TARGET_PROTEINS_DURING_BIOSYNTHESIS		35	-0.153204	-1.05119	0.372361	0.620692	1	4624	tags=60%, list=45%, signal=108%
REACTOME_INTRA_GOLGI_TRAFFIC		40	-0.138963	-1.04958	0.379242	0.620734	1	4513	tags=58%, list=44%, signal=102%
REACTOME_SIGNALING_BY_TYPE_1_INSULIN_LIKE_GROWTH_FACTOR_1_RECEPTOR_IGF1R		30	-0.165551	-1.04921	0.373814	0.61837	1	8630	tags=100%, list=84%, signal=604%
REACTOME_SIGNALING_BY_NOTCH1		62	-0.110482	-1.04017	0.386774	0.632401	1	7034	tags=79%, list=68%, signal=246%
REACTOME_SIGNALING_BY_NOTCH		152	-0.0736631	-1.03777	0.431907	0.633624	1	8430	tags=89%, list=82%, signal=475%
REACTOME_ACTIVATION_OF_BAD_AND_TRANSLOCATION_TO_MITOCHONDRIA		15	-0.221415	-1.03146	0.392354	0.642632	1	2539	tags=47%, list=25%, signal=62%
REACTOME_DOWNSTREAM_SIGNALING_OF_ACTIVATED_FGFR3		15	-0.219961	-1.02877	0.400391	0.644636	1	7377	tags=93%, list=71%, signal=326%
REACTOME_RAF_INDEPENDENT_MAPK1_3_ACTIVATION		22	-0.185754	-1.02821	0.382937	0.642727	1	7011	tags=86%, list=68%, signal=268%
REACTOME_G_ALPHA_Q_SIGNALLING_EVENTS		93	-0.092116	-1.02754	0.396484	0.640935	1	1169	tags=20%, list=11%, signal=23%
REACTOME_TOLL_LIKE_RECEPTOR_TLR1_TLR2_CASCADE		88	-0.0955978	-1.02434	0.42418	0.643816	1	6068	tags=68%, list=59%, signal=164%
REACTOME_ACTIVATED_TAK1_MEDIATES_P38_MAPK_ACTIVATION		21	-0.184423	-1.02169	0.41502	0.645669	1	2036	tags=38%, list=20%, signal=47%
REACTOME_EPHA_MEDIATED_GROWTH_CONE_COLLAPSE		15	-0.219864	-1.01932	0.41	0.647212	1	2555	tags=47%, list=25%, signal=62%
REACTOME_CARGO_TRAFFICKING_TO_THE_PERICILIARY_MEMBRANE		40	-0.135418	-1.00732	0.434077	0.666553	1	5583	tags=68%, list=54%, signal=146%
REACTOME_FLT3_SIGNALING_IN_DISEASE		25	-0.165335	-1.00107	0.429167	0.675398	1	8218	tags=96%, list=80%, signal=468%
REACTOME_SIGNALING_BY_ERBB4		36	-0.138055	-0.997723	0.434959	0.678814	1	8340	tags=94%, list=81%, signal=488%
REACTOME_IKK_COMPLEX_RECRUITMENT_MEDIATED_BY_RIP1		19	-0.185012	-0.997195	0.437247	0.676801	1	2444	tags=42%, list=24%, signal=55%
REACTOME_SIGNALING_BY_TGFB_FAMILY_MEMBERS		76	-0.0980205	-0.996127	0.45	0.675738	1	3211	tags=41%, list=31%, signal=59%
REACTOME_RORA_ACTIVATES_GENE_EXPRESSION		16	-0.205277	-0.994016	0.439604	0.676751	1	5634	tags=75%, list=55%, signal=165%
REACTOME_TNFR1_INDUCED_NFKAPPAB_SIGNALING_PATHWAY		28	-0.155737	-0.994011	0.438	0.673724	1	2456	tags=39%, list=24%, signal=51%
REACTOME_SIGNALING_BY_FGFR2_IN_DISEASE		25	-0.164985	-0.991354	0.453815	0.675731	1	8635	tags=100%, list=84%, signal=606%
REACTOME_SIGNALING_BY_CYTOSOLIC_FGFR1_FUSION_MUTANTS		17	-0.199617	-0.987897	0.433134	0.679248	1	1589	tags=35%, list=15%, signal=42%
REACTOME_NUCLEOTIDE_BINDING_DOMAIN_LEUCINE_RICH_REPEAT_CONTAINING_RECEPTOR_NLR_SIGNALING_PATHWAYS		52	-0.117743	-0.986504	0.459566	0.679106	1	2169	tags=33%, list=21%, signal=41%
REACTOME_SIGNALING_BY_FLT3_ITD_AND_TKD_MUTANTS		15	-0.211337	-0.985521	0.46516	0.678073	1	8155	tags=100%, list=79%, signal=473%
REACTOME_GLUCONEOGENESIS		24	-0.169225	-0.985278	0.472574	0.675601	1	6438	tags=79%, list=62%, signal=209%
REACTOME_NR1H3_NR1H2_REGULATE_GENE_EXPRESSION_LINKED_TO_CHOLESTEROL_TRANSPORT_AND_EFFLUX		29	-0.153339	-0.982523	0.436893	0.678004	1	3410	tags=48%, list=33%, signal=72%
REACTOME_SIGNALING_BY_FLT3_FUSION_PROTEINS		18	-0.190139	-0.970988	0.480652	0.697087	1	7226	tags=89%, list=70%, signal=295%
REACTOME_PARASITE_INFECTION		53	-0.112818	-0.970876	0.467181	0.694304	1	3326	tags=43%, list=32%, signal=64%
REACTOME_SIGNALING_BY_BMP		15	-0.208527	-0.97009	0.505071	0.692849	1	1983	tags=40%, list=19%, signal=49%
REACTOME_ESTROGEN_DEPENDENT_GENE_EXPRESSION		76	-0.0958568	-0.969958	0.482309	0.690109	1	5273	tags=61%, list=51%, signal=123%
REACTOME_TRANSLATION_OF_SARS_COV_2_STRUCTURAL_PROTEINS		40	-0.125801	-0.964626	0.492063	0.697185	1	7749	tags=88%, list=75%, signal=348%
REACTOME_MRNA_CAPPING		26	-0.157338	-0.963579	0.480315	0.696122	1	8714	tags=100%, list=84%, signal=636%
REACTOME_IRE1ALPHA_ACTIVATES_CHAPERONES		45	-0.122352	-0.960732	0.483034	0.698686	1	4943	tags=60%, list=48%, signal=115%
REACTOME_NEGATIVE_REGULATION_OF_THE_PI3K_AKT_NETWORK		72	-0.0968812	-0.95316	0.501923	0.709898	1	1734	tags=26%, list=17%, signal=31%
REACTOME_SIGNALING_BY_PDGFR_IN_DISEASE		17	-0.188659	-0.937438	0.517598	0.736678	1	2310	tags=41%, list=22%, signal=53%
REACTOME_AUTOPHAGY		123	-0.0731373	-0.935657	0.5	0.736886	1	9169	tags=96%, list=89%, signal=840%
REACTOME_ER_QUALITY_CONTROL_COMPARTMENT_ERQC		19	-0.180399	-0.93167	0.506303	0.741512	1	8475	tags=100%, list=82%, signal=555%
REACTOME_ZBP1_DAI_MEDIATED_INDUCTION_OF_TYPE_I_IFNS		20	-0.17477	-0.929426	0.537109	0.742677	1	782	tags=25%, list=8%, signal=27%
REACTOME_LYSOSOME_VESICLE_BIOGENESIS		29	-0.143187	-0.926963	0.557505	0.744314	1	3871	tags=52%, list=37%, signal=82%
REACTOME_SIGNALING_BY_FGFR_IN_DISEASE		43	-0.118568	-0.923531	0.523517	0.747773	1	8635	tags=95%, list=84%, signal=577%
REACTOME_INTERLEUKIN_37_SIGNALING		17	-0.183671	-0.919878	0.540323	0.751554	1	7225	tags=88%, list=70%, signal=293%
REACTOME_INTERLEUKIN_12_SIGNALING		37	-0.127763	-0.918354	0.536	0.751227	1	7903	tags=89%, list=76%, signal=378%
REACTOME_TRANSCRIPTION_OF_THE_HIV_GENOME		59	-0.100783	-0.916268	0.568665	0.752084	1	7899	tags=86%, list=76%, signal=365%
REACTOME_FCGAMMA_RECEPTOR_FCGR_DEPENDENT_PHAGOCYTOSIS		76	-0.087833	-0.91178	0.561538	0.757393	1	8619	tags=92%, list=83%, signal=551%
REACTOME_SIGNALING_BY_NTRK2_TRKB		19	-0.171685	-0.910638	0.578313	0.756447	1	7477	tags=89%, list=72%, signal=323%
REACTOME_DAP12_SIGNALING		27	-0.142899	-0.909212	0.574037	0.756074	1	8863	tags=100%, list=86%, signal=700%
REACTOME_EXTRA_NUCLEAR_ESTROGEN_SIGNALING		49	-0.108789	-0.907177	0.554	0.756944	1	9217	tags=100%, list=89%, signal=920%
REACTOME_NEGATIVE_REGULATORS_OF_DDX58_IFIH1_SIGNALING		30	-0.139835	-0.904635	0.548729	0.758605	1	1316	tags=27%, list=13%, signal=30%
REACTOME_GLYCOSPHINGOLIPID_METABOLISM		32	-0.134633	-0.901563	0.546	0.76118	1	7657	tags=88%, list=74%, signal=337%
REACTOME_TRNA_PROCESSING		93	-0.0778231	-0.888808	0.584362	0.782772	1	7872	tags=84%, list=76%, signal=349%
REACTOME_TGF_BETA_RECEPTOR_SIGNALING_ACTIVATES_SMADS		29	-0.140076	-0.885664	0.592668	0.78566	1	8536	tags=97%, list=83%, signal=553%
REACTOME_TAK1_ACTIVATES_NFKB_BY_PHOSPHORYLATION_AND_ACTIVATION_OF_IKKS_COMPLEX		27	-0.145065	-0.88543	0.604289	0.783027	1	3099	tags=44%, list=30%, signal=63%
REACTOME_CLASS_I_PEROXISOMAL_MEMBRANE_PROTEIN_IMPORT		18	-0.175245	-0.884901	0.581443	0.781021	1	5083	tags=67%, list=49%, signal=131%
REACTOME_CARGO_CONCENTRATION_IN_THE_ER		22	-0.152667	-0.877184	0.604839	0.79229	1	7822	tags=91%, list=76%, signal=373%
REACTOME_NEGATIVE_EPIGENETIC_REGULATION_OF_RRNA_EXPRESSION		46	-0.108364	-0.876498	0.622824	0.790505	1	7873	tags=87%, list=76%, signal=363%
REACTOME_KERATAN_SULFATE_BIOSYNTHESIS		15	-0.185271	-0.875162	0.607724	0.789761	1	1534	tags=33%, list=15%, signal=39%
REACTOME_SUMOYLATION_OF_TRANSCRIPTION_COFACTORS		37	-0.120456	-0.87406	0.609407	0.788556	1	5185	tags=62%, list=50%, signal=124%
REACTOME_UPTAKE_AND_ACTIONS_OF_BACTERIAL_TOXINS		19	-0.166446	-0.871343	0.625498	0.790552	1	8075	tags=95%, list=78%, signal=432%
REACTOME_MYOGENESIS		19	-0.162997	-0.869158	0.61245	0.791625	1	3759	tags=53%, list=36%, signal=83%
REACTOME_INTEGRIN_SIGNALING		23	-0.148965	-0.85283	0.642436	0.818296	1	2509	tags=39%, list=24%, signal=52%
REACTOME_SARS_COV_1_INFECTION		41	-0.107801	-0.843395	0.660643	0.83232	1	8218	tags=90%, list=80%, signal=439%
REACTOME_MITOPHAGY		24	-0.147149	-0.842887	0.654224	0.830179	1	2790	tags=42%, list=27%, signal=57%
REACTOME_SULFUR_AMINO_ACID_METABOLISM		20	-0.152157	-0.840306	0.645749	0.831767	1	5666	tags=70%, list=55%, signal=155%
REACTOME_RESPONSE_OF_MTB_TO_PHAGOCYTOSIS		20	-0.157538	-0.839083	0.648649	0.830866	1	4577	tags=60%, list=44%, signal=107%
REACTOME_METABOLISM_OF_CARBOHYDRATES		210	-0.0512452	-0.835306	0.664	0.834541	1	7947	tags=82%, list=77%, signal=347%
REACTOME_UNFOLDED_PROTEIN_RESPONSE_UPR		80	-0.0806923	-0.832594	0.670498	0.836316	1	8475	tags=90%, list=82%, signal=496%
REACTOME_CD209_DC_SIGN_SIGNALING		18	-0.166424	-0.832271	0.693089	0.833777	1	8619	tags=100%, list=83%, signal=601%
REACTOME_N_GLYCAN_ANTENNAE_ELONGATION_IN_THE_MEDIAL_TRANS_GOLGI		17	-0.170616	-0.830963	0.653608	0.832969	1	4320	tags=59%, list=42%, signal=101%
REACTOME_SARS_COV_INFECTIONS		124	-0.0616366	-0.823438	0.694444	0.843269	1	7873	tags=82%, list=76%, signal=341%
REACTOME_DAP12_INTERACTIONS		30	-0.125958	-0.823186	0.678788	0.840618	1	9038	tags=100%, list=87%, signal=795%
REACTOME_RAC3_GTPASE_CYCLE		75	-0.0804094	-0.818316	0.710059	0.845765	1	3310	tags=40%, list=32%, signal=58%
REACTOME_CYTOCHROME_P450_ARRANGED_BY_SUBSTRATE_TYPE		19	-0.153874	-0.814492	0.662551	0.849422	1	4941	tags=63%, list=48%, signal=121%
REACTOME_PI3K_AKT_SIGNALING_IN_CANCER		63	-0.0874174	-0.812242	0.701581	0.850413	1	2384	tags=32%, list=23%, signal=41%
REACTOME_DDX58_IFIH1_MEDIATED_INDUCTION_OF_INTERFERON_ALPHA_BETA		58	-0.0901662	-0.806901	0.698545	0.856524	1	5311	tags=60%, list=51%, signal=123%
REACTOME_THE_ROLE_OF_NEF_IN_HIV_1_REPLICATION_AND_DISEASE_PATHOGENESIS		25	-0.135616	-0.802283	0.696737	0.861229	1	6044	tags=72%, list=58%, signal=173%
REACTOME_TRAF6_MEDIATED_NF_KB_ACTIVATION		20	-0.150533	-0.800451	0.711693	0.861262	1	3099	tags=45%, list=30%, signal=64%
REACTOME_RIP_MEDIATED_NFKB_ACTIVATION_VIA_ZBP1		17	-0.159989	-0.789804	0.738523	0.876063	1	782	tags=24%, list=8%, signal=25%
REACTOME_NEF_MEDIATES_DOWN_MODULATION_OF_CELL_SURFACE_RECEPTORS_BY_RECRUITING_THEM_TO_CLATHRIN_ADAPTERS		18	-0.154809	-0.789478	0.716667	0.873421	1	5868	tags=72%, list=57%, signal=167%
REACTOME_NOTCH1_INTRACELLULAR_DOMAIN_REGULATES_TRANSCRIPTION		40	-0.105342	-0.787245	0.7125	0.873897	1	8218	tags=90%, list=80%, signal=438%
REACTOME_RHO_GTPASES_ACTIVATE_NADPH_OXIDASES		22	-0.143826	-0.786111	0.72332	0.872746	1	4155	tags=55%, list=40%, signal=91%
REACTOME_RHO_GTPASES_ACTIVATE_CIT		15	-0.16686	-0.784118	0.745763	0.872822	1	3791	tags=53%, list=37%, signal=84%
REACTOME_TRIGLYCERIDE_METABOLISM		17	-0.157463	-0.782482	0.737805	0.872393	1	1416	tags=29%, list=14%, signal=34%
REACTOME_E3_UBIQUITIN_LIGASES_UBIQUITINATE_TARGET_PROTEINS		37	-0.10942	-0.780759	0.757085	0.872107	1	4740	tags=57%, list=46%, signal=104%
REACTOME_CA2_PATHWAY		43	-0.101786	-0.7741	0.754352	0.879643	1	2799	tags=37%, list=27%, signal=51%
REACTOME_DISEASES_ASSOCIATED_WITH_GLYCOSYLATION_PRECURSOR_BIOSYNTHESIS		17	-0.155952	-0.772397	0.756048	0.879404	1	7511	tags=88%, list=73%, signal=322%
REACTOME_NUCLEAR_RECEPTOR_TRANSCRIPTION_PATHWAY		29	-0.121125	-0.770524	0.748428	0.879311	1	3742	tags=48%, list=36%, signal=75%
REACTOME_DOWNREGULATION_OF_TGF_BETA_RECEPTOR_SIGNALING		24	-0.132807	-0.770242	0.759674	0.87668	1	8536	tags=96%, list=83%, signal=549%
REACTOME_SIGNALING_BY_EGFR		37	-0.107985	-0.769279	0.733888	0.875233	1	8386	tags=92%, list=81%, signal=486%
REACTOME_TRANSLOCATION_OF_SLC2A4_GLUT4_TO_THE_PLASMA_MEMBRANE		58	-0.0854754	-0.765036	0.751592	0.879068	1	8923	tags=95%, list=86%, signal=690%
REACTOME_OVARIAN_TUMOR_DOMAIN_PROTEASES		35	-0.108072	-0.764636	0.750495	0.876718	1	2136	tags=31%, list=21%, signal=39%
REACTOME_AMINO_ACID_TRANSPORT_ACROSS_THE_PLASMA_MEMBRANE		21	-0.139478	-0.76314	0.726721	0.876125	1	7421	tags=86%, list=72%, signal=303%
REACTOME_DOWNSTREAM_SIGNALING_OF_ACTIVATED_FGFR1		16	-0.159705	-0.758763	0.752599	0.879889	1	8688	tags=100%, list=84%, signal=627%
REACTOME_DAG_AND_IP3_SIGNALING		30	-0.111887	-0.75274	0.809524	0.886241	1	915	tags=20%, list=9%, signal=22%
REACTOME_NOTCH3_INTRACELLULAR_DOMAIN_REGULATES_TRANSCRIPTION		17	-0.150536	-0.748855	0.778226	0.889195	1	6351	tags=76%, list=61%, signal=198%
REACTOME_FORMATION_OF_INCISION_COMPLEX_IN_GG_NER		38	-0.103983	-0.748111	0.789157	0.887251	1	1922	tags=29%, list=19%, signal=35%
REACTOME_SIGNALING_BY_NOTCH3		37	-0.104255	-0.745664	0.778656	0.887887	1	324	tags=14%, list=3%, signal=14%
REACTOME_PROTEIN_UBIQUITINATION		57	-0.0834588	-0.744521	0.798781	0.886538	1	4764	tags=54%, list=46%, signal=100%
REACTOME_SYNTHESIS_OF_SUBSTRATES_IN_N_GLYCAN_BIOSYTHESIS		48	-0.0896702	-0.735544	0.782609	0.896871	1	8337	tags=90%, list=81%, signal=461%
REACTOME_FATTY_ACYL_COA_BIOSYNTHESIS		20	-0.137179	-0.724905	0.822266	0.909128	1	8921	tags=100%, list=86%, signal=729%
REACTOME_SIGNALING_BY_PTK6		42	-0.0961263	-0.721999	0.827515	0.910264	1	7378	tags=81%, list=71%, signal=282%
REACTOME_SIGNALING_BY_EGFR_IN_CANCER		17	-0.146352	-0.721503	0.829126	0.907951	1	8218	tags=94%, list=80%, signal=459%
REACTOME_INSULIN_PROCESSING		17	-0.144066	-0.715698	0.839357	0.912764	1	3986	tags=53%, list=39%, signal=86%
REACTOME_CONSTITUTIVE_SIGNALING_BY_LIGAND_RESPONSIVE_EGFR_CANCER_VARIANTS		17	-0.146352	-0.714936	0.844231	0.910724	1	8218	tags=94%, list=80%, signal=459%
REACTOME_POST_TRANSLATIONAL_MODIFICATION_SYNTHESIS_OF_GPI_ANCHORED_PROTEINS		38	-0.0998502	-0.714452	0.813387	0.908355	1	7676	tags=84%, list=74%, signal=326%
REACTOME_INFECTION_WITH_MYCOBACTERIUM_TUBERCULOSIS		24	-0.121884	-0.712279	0.839844	0.908534	1	8218	tags=92%, list=80%, signal=446%
REACTOME_SEMA4D_IN_SEMAPHORIN_SIGNALING		18	-0.135068	-0.698682	0.86214	0.9234	1	3775	tags=50%, list=37%, signal=79%
REACTOME_RHO_GTPASES_ACTIVATE_ROCKS		15	-0.147868	-0.687763	0.851504	0.934355	1	7432	tags=87%, list=72%, signal=308%
REACTOME_ACTIVATED_NOTCH1_TRANSMITS_SIGNAL_TO_THE_NUCLEUS		26	-0.112329	-0.683501	0.875752	0.936474	1	433	tags=15%, list=4%, signal=16%
REACTOME_SIGNALING_BY_FGFR3		28	-0.10803	-0.682365	0.877049	0.934845	1	7377	tags=82%, list=71%, signal=286%
REACTOME_RIPK1_MEDIATED_REGULATED_NECROSIS		25	-0.11387	-0.681294	0.863378	0.933168	1	9162	tags=100%, list=89%, signal=879%
REACTOME_GPVI_MEDIATED_ACTIVATION_CASCADE		28	-0.107101	-0.675553	0.867816	0.937132	1	8863	tags=96%, list=86%, signal=675%
REACTOME_GLYCOGEN_METABOLISM		23	-0.118241	-0.669929	0.887029	0.940693	1	8218	tags=91%, list=80%, signal=445%
REACTOME_DISEASES_OF_METABOLISM		142	-0.0476245	-0.66967	0.901804	0.938049	1	9705	tags=99%, list=94%, signal=1595%
REACTOME_PHASE_II_CONJUGATION_OF_COMPOUNDS		46	-0.0859487	-0.668058	0.870588	0.936972	1	9227	tags=98%, list=89%, signal=908%
REACTOME_DISEASES_OF_CARBOHYDRATE_METABOLISM		27	-0.106756	-0.661458	0.916667	0.941552	1	8470	tags=93%, list=82%, signal=512%
REACTOME_DISEASES_OF_GLYCOSYLATION		79	-0.0626148	-0.660088	0.910751	0.940043	1	9563	tags=99%, list=93%, signal=1312%
REACTOME_RHO_GTPASES_ACTIVATE_PAKS		16	-0.131553	-0.642033	0.906504	0.955725	1	3811	tags=50%, list=37%, signal=79%
REACTOME_SIGNALING_BY_NOTCH1_PEST_DOMAIN_MUTANTS_IN_CANCER		50	-0.0772873	-0.637203	0.893536	0.957315	1	4787	tags=54%, list=46%, signal=100%
REACTOME_SIGNALING_BY_FGFR4		27	-0.102434	-0.636612	0.92126	0.954908	1	7749	tags=85%, list=75%, signal=340%
REACTOME_RET_SIGNALING		28	-0.101547	-0.636102	0.922756	0.952361	1	1169	tags=21%, list=11%, signal=24%
REACTOME_EPH_EPHRIN_SIGNALING		64	-0.0660415	-0.625775	0.924752	0.959194	1	6428	tags=69%, list=62%, signal=181%
REACTOME_SIGNALING_BY_ERBB2		39	-0.084596	-0.621685	0.922925	0.959842	1	2310	tags=31%, list=22%, signal=39%
REACTOME_BIOSYNTHESIS_OF_THE_N_GLYCAN_PRECURSOR_DOLICHOL_LIPID_LINKED_OLIGOSACCHARIDE_LLO_AND_TRANSFER_TO_A_NASCENT_PROTEIN		60	-0.066326	-0.603324	0.95842	0.971982	1	8621	tags=90%, list=83%, signal=540%
REACTOME_TP53_REGULATES_TRANSCRIPTION_OF_CELL_DEATH_GENES		31	-0.0899776	-0.599816	0.9375	0.971797	1	6075	tags=68%, list=59%, signal=164%
REACTOME_PERK_REGULATES_GENE_EXPRESSION		28	-0.0918273	-0.575054	0.963107	0.985458	1	7544	tags=82%, list=73%, signal=303%
REACTOME_VEGFR2_MEDIATED_CELL_PROLIFERATION		18	-0.110772	-0.571832	0.965726	0.984252	1	1729	tags=28%, list=17%, signal=33%
REACTOME_NOTCH_HLH_TRANSCRIPTION_PATHWAY		24	-0.0939651	-0.540753	0.985106	0.996598	1	324	tags=13%, list=3%, signal=13%
REACTOME_NETRIN_1_SIGNALING		30	-0.0835516	-0.534265	0.97446	0.996287	1	518	tags=13%, list=5%, signal=14%
REACTOME_SIGNALING_BY_NTRK3_TRKC		15	-0.115504	-0.528792	0.980469	0.99545	1	1565	tags=27%, list=15%, signal=31%
REACTOME_BUTYRATE_RESPONSE_FACTOR_1_BRF1_BINDS_AND_DESTABILIZES_MRNA		16	-0.106309	-0.509126	0.988506	0.99849	1	9239	tags=100%, list=89%, signal=942%
REACTOME_TRISTETRAPROLIN_TTP_ZFP36_BINDS_AND_DESTABILIZES_MRNA		16	-0.106309	-0.507146	0.99006	0.996027	1	9239	tags=100%, list=89%, signal=942%
REACTOME_VXPX_CARGO_TARGETING_TO_CILIUM		17	-0.100835	-0.502119	0.982107	0.99432	1	5040	tags=59%, list=49%, signal=115%
REACTOME_NOTCH2_ACTIVATION_AND_TRANSMISSION_OF_SIGNAL_TO_THE_NUCLEUS		18	-0.0815483	-0.419482	1	1	1	308	tags=11%, list=3%, signal=11%
REACTOME_DISEASES_ASSOCIATED_WITH_N_GLYCOSYLATION_OF_PROTEINS		16	-0.082227	-0.40074	1	0.999477	1	4320	tags=50%, list=42%, signal=86%

## Sheet: WT_IgM_vs_KO_IgM_Hallmark_pos
NAME	GS DETAILS	SIZE	ES	NES	NOM p-val	FDR q-val	FWER p-val	RANK AT MAX	LEADING EDGE
HALLMARK_E2F_TARGETS	Details ...	186	0.538626	8.45438	0	0	0	1867	tags=71%, list=18%, signal=85%
HALLMARK_G2M_CHECKPOINT	Details ...	179	0.379713	5.80938	0	0	0	1339	tags=50%, list=13%, signal=57%
HALLMARK_MITOTIC_SPINDLE	Details ...	186	0.231628	3.60999	0	0	0	3927	tags=61%, list=38%, signal=96%
HALLMARK_COAGULATION	Details ...	75	0.252612	2.53089	0.00191205	0.00103185	0.004	3746	tags=61%, list=36%, signal=96%
HALLMARK_OXIDATIVE_PHOSPHORYLATION	Details ...	186	0.144206	2.34145	0	0.00329966	0.015	6759	tags=80%, list=65%, signal=226%
HALLMARK_MYC_TARGETS_V1	Details ...	179	0.148534	2.31167	0.00409836	0.00291638	0.016	7613	tags=88%, list=74%, signal=329%
HALLMARK_KRAS_SIGNALING_DN	Details ...	66	0.223572	2.14675	0.00195312	0.00778516	0.048	3497	tags=56%, list=34%, signal=84%
HALLMARK_COMPLEMENT	Details ...	137	0.152245	2.08724	0.00824742	0.00981736	0.067	4406	tags=58%, list=43%, signal=99%
HALLMARK_ESTROGEN_RESPONSE_LATE	Details ...	131	0.1564	2.08244	0	0.00911543	0.07	2900	tags=44%, list=28%, signal=60%
HALLMARK_MYOGENESIS	Details ...	101	0.174517	2.06372	0.00408163	0.00918731	0.079	3227	tags=49%, list=31%, signal=70%
HALLMARK_EPITHELIAL_MESENCHYMAL_TRANSITION	Details ...	85	0.191162	2.04559	0.00422833	0.00931135	0.087	6186	tags=79%, list=60%, signal=195%
HALLMARK_GLYCOLYSIS	Details ...	146	0.141021	2.02887	0.00424628	0.00980062	0.101	3942	tags=52%, list=38%, signal=83%
HALLMARK_IL2_STAT5_SIGNALING	Details ...	169	0.131184	1.97139	0.00776699	0.0120316	0.128	2885	tags=41%, list=28%, signal=56%
HALLMARK_ANGIOGENESIS	Details ...	21	0.35609	1.95465	0	0.0127041	0.143	2232	tags=57%, list=22%, signal=73%
HALLMARK_SPERMATOGENESIS	Details ...	70	0.183188	1.77755	0.0117188	0.0325922	0.339	1662	tags=34%, list=16%, signal=41%
HALLMARK_KRAS_SIGNALING_UP	Details ...	125	0.131565	1.7019	0.0274841	0.0469818	0.474	4526	tags=57%, list=44%, signal=100%
HALLMARK_DNA_REPAIR	Details ...	130	0.121215	1.63387	0.0334029	0.05991	0.588	5440	tags=65%, list=53%, signal=135%
HALLMARK_APICAL_SURFACE	Details ...	22	0.266777	1.50469	0.0823293	0.105128	0.817	2885	tags=55%, list=28%, signal=76%
HALLMARK_APICAL_JUNCTION	Details ...	122	0.116163	1.48006	0.0717054	0.112116	0.852	2540	tags=36%, list=25%, signal=47%
HALLMARK_UV_RESPONSE_UP	Details ...	125	0.101986	1.32862	0.146091	0.199421	0.974	4828	tags=57%, list=47%, signal=105%
HALLMARK_REACTIVE_OXYGEN_SPECIES_PATHWAY		45	0.161257	1.30474	0.143426	0.207017	0.98	7756	tags=91%, list=75%, signal=364%
HALLMARK_XENOBIOTIC_METABOLISM		130	0.0946105	1.25828	0.194332	0.240055	0.992	5791	tags=65%, list=56%, signal=147%
HALLMARK_WNT_BETA_CATENIN_SIGNALING		31	0.180337	1.17127	0.25	0.312236	0.999	3475	tags=52%, list=34%, signal=78%
HALLMARK_HEDGEHOG_SIGNALING		22	0.19847	1.11875	0.302326	0.356362	0.999	4529	tags=64%, list=44%, signal=113%
HALLMARK_PEROXISOME		80	0.103255	1.07243	0.344423	0.39437	0.999	6433	tags=73%, list=62%, signal=191%
HALLMARK_HEME_METABOLISM		162	0.064448	0.942608	0.517745	0.551398	1	5723	tags=62%, list=55%, signal=136%
HALLMARK_IL6_JAK_STAT3_SIGNALING		68	0.0922688	0.889457	0.596311	0.606921	1	6043	tags=68%, list=58%, signal=162%
HALLMARK_ADIPOGENESIS		166	0.0558619	0.819855	0.703557	0.686931	1	3291	tags=37%, list=32%, signal=54%

## Sheet: WT_IgM_vs_KO_IgM_Hallmark_neg
NAME	GS DETAILS	SIZE	ES	NES	NOM p-val	FDR q-val	FWER p-val	RANK AT MAX	LEADING EDGE
HALLMARK_TNFA_SIGNALING_VIA_NFKB	Details ...	167	-0.133837	-2.01991	0.00191205	0.0957038	0.106	1982	tags=32%, list=19%, signal=39%
HALLMARK_ALLOGRAFT_REJECTION	Details ...	148	-0.121435	-1.78455	0.0196464	0.177698	0.351	2046	tags=32%, list=20%, signal=39%
HALLMARK_TGF_BETA_SIGNALING	Details ...	43	-0.218711	-1.68893	0.0326797	0.190906	0.504	2557	tags=47%, list=25%, signal=62%
HALLMARK_PROTEIN_SECRETION	Details ...	86	-0.153973	-1.65574	0.0235756	0.172614	0.571	4672	tags=60%, list=45%, signal=109%
HALLMARK_NOTCH_SIGNALING	Details ...	27	-0.258181	-1.59791	0.0355649	0.183999	0.673	1933	tags=44%, list=19%, signal=55%
HALLMARK_UV_RESPONSE_DN	Details ...	96	-0.142003	-1.58937	0.0697211	0.159595	0.684	2315	tags=36%, list=22%, signal=47%
HALLMARK_UNFOLDED_PROTEIN_RESPONSE	Details ...	102	-0.13491	-1.5591	0.0456349	0.155956	0.725	6929	tags=80%, list=67%, signal=242%
HALLMARK_MTORC1_SIGNALING	Details ...	179	-0.0954303	-1.46692	0.068	0.207529	0.873	7346	tags=80%, list=71%, signal=273%
HALLMARK_HYPOXIA	Details ...	140	-0.108632	-1.45778	0.0697674	0.193271	0.89	1994	tags=30%, list=19%, signal=37%
HALLMARK_INTERFERON_GAMMA_RESPONSE	Details ...	163	-0.0930468	-1.37965	0.110039	0.243858	0.952	7741	tags=84%, list=75%, signal=330%
HALLMARK_MYC_TARGETS_V2	Details ...	53	-0.160961	-1.36901	0.120623	0.233134	0.96	6146	tags=75%, list=59%, signal=185%
HALLMARK_PI3K_AKT_MTOR_SIGNALING	Details ...	87	-0.123119	-1.35526	0.124304	0.226022	0.967	6936	tags=79%, list=67%, signal=239%
HALLMARK_INTERFERON_ALPHA_RESPONSE	Details ...	82	-0.116909	-1.24037	0.178926	0.324142	0.996	8003	tags=89%, list=77%, signal=391%
HALLMARK_ESTROGEN_RESPONSE_EARLY	Details ...	126	-0.0948113	-1.23906	0.187764	0.302338	0.996	2232	tags=31%, list=22%, signal=39%
HALLMARK_FATTY_ACID_METABOLISM	Details ...	122	-0.0935099	-1.19907	0.255319	0.325095	0.997	8195	tags=89%, list=79%, signal=422%
HALLMARK_INFLAMMATORY_RESPONSE	Details ...	143	-0.0849151	-1.17493	0.251004	0.330357	0.998	1376	tags=22%, list=13%, signal=25%
HALLMARK_APOPTOSIS	Details ...	130	-0.0798138	-1.08239	0.361963	0.426143	0.999	4672	tags=53%, list=45%, signal=96%
HALLMARK_ANDROGEN_RESPONSE	Details ...	80	-0.0941248	-0.984866	0.45339	0.533065	1	2653	tags=35%, list=26%, signal=47%
HALLMARK_CHOLESTEROL_HOMEOSTASIS	Details ...	63	-0.0996838	-0.925844	0.535433	0.592001	1	2258	tags=32%, list=22%, signal=40%
HALLMARK_P53_PATHWAY	Details ...	153	-0.057955	-0.83466	0.685874	0.701546	1	2991	tags=35%, list=29%, signal=48%
HALLMARK_BILE_ACID_METABOLISM		72	-0.0610689	-0.628256	0.937751	0.921491	1	1958	tags=25%, list=19%, signal=31%

## Sheet: WT_IgM_vs_KO_IgM_KEGG_pos
NAME	GS DETAILS	SIZE	ES	NES	NOM p-val	FDR q-val	FWER p-val	RANK AT MAX	LEADING EDGE
KEGG_DNA_REPLICATION	Details ...	33	0.694243	4.68731	0	0	0	1616	tags=85%, list=16%, signal=100%
KEGG_CELL_CYCLE	Details ...	112	0.301711	3.71135	0	0	0	1713	tags=46%, list=17%, signal=55%
KEGG_MISMATCH_REPAIR	Details ...	20	0.614397	3.33055	0	0	0	2963	tags=90%, list=29%, signal=126%
KEGG_HOMOLOGOUS_RECOMBINATION	Details ...	24	0.502425	2.87643	0	0.000201149	0.001	3431	tags=83%, list=33%, signal=124%
KEGG_PARKINSONS_DISEASE	Details ...	105	0.218964	2.61138	0	0.000690685	0.004	6027	tags=80%, list=58%, signal=190%
KEGG_SPLICEOSOME	Details ...	111	0.207921	2.56601	0	0.000575571	0.004	4577	tags=65%, list=44%, signal=115%
KEGG_HUNTINGTONS_DISEASE	Details ...	142	0.185539	2.54367	0	0.000761815	0.006	6041	tags=77%, list=58%, signal=182%
KEGG_CYTOKINE_CYTOKINE_RECEPTOR_INTERACTION	Details ...	122	0.187317	2.41062	0	0.00307897	0.025	3084	tags=48%, list=30%, signal=68%
KEGG_BASE_EXCISION_REPAIR	Details ...	30	0.367686	2.39826	0.00208768	0.00283658	0.026	4478	tags=80%, list=43%, signal=141%
KEGG_CARDIAC_MUSCLE_CONTRACTION	Details ...	46	0.298371	2.39207	0	0.00265586	0.027	5242	tags=80%, list=51%, signal=162%
KEGG_COMPLEMENT_AND_COAGULATION_CASCADES	Details ...	28	0.37277	2.36985	0	0.00267042	0.03	3539	tags=71%, list=34%, signal=108%
KEGG_ALZHEIMERS_DISEASE	Details ...	133	0.152389	2.07016	0.00845666	0.0201507	0.23	6215	tags=75%, list=60%, signal=186%
KEGG_GLUTATHIONE_METABOLISM	Details ...	33	0.301257	2.01958	0.00414079	0.0269494	0.321	4725	tags=76%, list=46%, signal=139%
KEGG_PROTEASOME	Details ...	41	0.262372	2.0079	0	0.0271867	0.346	7129	tags=95%, list=69%, signal=305%
KEGG_OXIDATIVE_PHOSPHORYLATION	Details ...	106	0.163701	1.99542	0.00601202	0.0271052	0.362	6027	tags=75%, list=58%, signal=177%
KEGG_OOCYTE_MEIOSIS	Details ...	85	0.184086	1.97185	0	0.0294302	0.395	1395	tags=32%, list=13%, signal=36%
KEGG_PURINE_METABOLISM	Details ...	110	0.161022	1.95889	0.00986193	0.029708	0.419	3614	tags=51%, list=35%, signal=77%
KEGG_HEMATOPOIETIC_CELL_LINEAGE	Details ...	55	0.225796	1.94476	0.00957854	0.0306576	0.443	3503	tags=56%, list=34%, signal=85%
KEGG_CELL_ADHESION_MOLECULES_CAMS	Details ...	63	0.210591	1.94314	0.00621118	0.0293398	0.446	1937	tags=40%, list=19%, signal=49%
KEGG_ARRHYTHMOGENIC_RIGHT_VENTRICULAR_CARDIOMYOPATHY_ARVC	Details ...	39	0.261364	1.94024	0.0100402	0.0281005	0.449	2873	tags=54%, list=28%, signal=74%
KEGG_DILATED_CARDIOMYOPATHY		50	0.21893	1.83938	0.026	0.0447397	0.629	6222	tags=82%, list=60%, signal=205%
KEGG_HYPERTROPHIC_CARDIOMYOPATHY_HCM		48	0.224993	1.823	0.00572519	0.0466309	0.664	6297	tags=83%, list=61%, signal=212%
KEGG_MELANOMA		44	0.229881	1.80238	0.0224719	0.0497383	0.712	4445	tags=66%, list=43%, signal=115%
KEGG_ECM_RECEPTOR_INTERACTION		41	0.233295	1.76812	0.0242424	0.0569917	0.778	2891	tags=51%, list=28%, signal=71%
KEGG_NUCLEOTIDE_EXCISION_REPAIR		39	0.229701	1.7019	0.032381	0.0761991	0.872	814	tags=31%, list=8%, signal=33%
KEGG_PYRIMIDINE_METABOLISM		76	0.166342	1.69068	0.0328228	0.07685	0.889	3460	tags=50%, list=33%, signal=75%
KEGG_PROGESTERONE_MEDIATED_OOCYTE_MATURATION		66	0.16444	1.60472	0.0383838	0.111661	0.962	4574	tags=61%, list=44%, signal=108%
KEGG_NICOTINATE_AND_NICOTINAMIDE_METABOLISM		17	0.313171	1.54264	0.0776699	0.145342	0.987	4063	tags=71%, list=39%, signal=116%
KEGG_MELANOGENESIS		60	0.166618	1.53645	0.0610236	0.144267	0.989	3110	tags=47%, list=30%, signal=66%
KEGG_PATHWAYS_IN_CANCER		227	0.0896551	1.53225	0.0515464	0.142152	0.991	2644	tags=34%, list=26%, signal=45%
KEGG_SYSTEMIC_LUPUS_ERYTHEMATOSUS		25	0.251542	1.52037	0.0655106	0.144748	0.991	1953	tags=44%, list=19%, signal=54%
KEGG_BASAL_CELL_CARCINOMA		29	0.23983	1.51749	0.0654762	0.142148	0.991	2873	tags=52%, list=28%, signal=71%
KEGG_GLYCEROPHOSPHOLIPID_METABOLISM		52	0.178839	1.51625	0.0601202	0.138503	0.991	2135	tags=38%, list=21%, signal=48%
KEGG_SMALL_CELL_LUNG_CANCER		67	0.155103	1.48733	0.0690335	0.153005	0.995	2417	tags=39%, list=23%, signal=50%
KEGG_PRION_DISEASES		24	0.241368	1.41922	0.11284	0.20014	0.999	3539	tags=58%, list=34%, signal=89%
KEGG_P53_SIGNALING_PATHWAY		54	0.155276	1.35998	0.143149	0.247092	1	2039	tags=35%, list=20%, signal=44%
KEGG_PRIMARY_IMMUNODEFICIENCY		30	0.203105	1.31777	0.146	0.28308	1	3418	tags=53%, list=33%, signal=79%
KEGG_ENDOCYTOSIS		142	0.0913987	1.27906	0.141414	0.320449	1	4526	tags=53%, list=44%, signal=93%
KEGG_AXON_GUIDANCE		79	0.120152	1.24684	0.200803	0.351336	1	1514	tags=27%, list=15%, signal=31%
KEGG_ALANINE_ASPARTATE_AND_GLUTAMATE_METABOLISM		21	0.222098	1.22327	0.212302	0.372378	1	3614	tags=57%, list=35%, signal=88%
KEGG_GLYCEROLIPID_METABOLISM		31	0.187459	1.21884	0.215094	0.369276	1	3735	tags=55%, list=36%, signal=86%
KEGG_PATHOGENIC_ESCHERICHIA_COLI_INFECTION		44	0.15563	1.21306	0.229979	0.367836	1	5444	tags=68%, list=53%, signal=143%
KEGG_GAP_JUNCTION		51	0.13221	1.13136	0.289683	0.476891	1	5732	tags=69%, list=55%, signal=153%
KEGG_FRUCTOSE_AND_MANNOSE_METABOLISM		29	0.174953	1.12933	0.315682	0.468795	1	3898	tags=55%, list=38%, signal=88%
KEGG_TYROSINE_METABOLISM		15	0.232267	1.10349	0.29724	0.497545	1	3114	tags=53%, list=30%, signal=76%
KEGG_PORPHYRIN_AND_CHLOROPHYLL_METABOLISM		23	0.191187	1.10175	0.32008	0.489168	1	3869	tags=57%, list=37%, signal=90%
KEGG_BLADDER_CANCER		33	0.158963	1.07618	0.348269	0.517996	1	4625	tags=61%, list=45%, signal=109%
KEGG_HEDGEHOG_SIGNALING_PATHWAY		24	0.181542	1.07346	0.334646	0.511508	1	2864	tags=46%, list=28%, signal=63%
KEGG_FOCAL_ADHESION		123	0.083448	1.06762	0.365904	0.51144	1	3180	tags=39%, list=31%, signal=56%
KEGG_THYROID_CANCER		25	0.179418	1.05626	0.363083	0.519086	1	3110	tags=48%, list=30%, signal=68%
KEGG_AMINO_SUGAR_AND_NUCLEOTIDE_SUGAR_METABOLISM		38	0.140846	1.05175	0.392638	0.516323	1	5892	tags=71%, list=57%, signal=165%
KEGG_ETHER_LIPID_METABOLISM		16	0.219837	1.02363	0.427083	0.550805	1	2898	tags=50%, list=28%, signal=69%
KEGG_SELENOAMINO_ACID_METABOLISM		18	0.197086	1.00513	0.438735	0.570583	1	2559	tags=44%, list=25%, signal=59%
KEGG_RNA_POLYMERASE		22	0.176595	0.992501	0.45674	0.580449	1	8043	tags=95%, list=78%, signal=430%
KEGG_DRUG_METABOLISM_OTHER_ENZYMES		17	0.193477	0.9575	0.512048	0.626758	1	5298	tags=71%, list=51%, signal=145%
KEGG_CITRATE_CYCLE_TCA_CYCLE		27	0.146025	0.928964	0.545635	0.66245	1	5001	tags=63%, list=48%, signal=122%
KEGG_ARACHIDONIC_ACID_METABOLISM		20	0.164542	0.904257	0.540434	0.694245	1	1919	tags=35%, list=19%, signal=43%
KEGG_ARGININE_AND_PROLINE_METABOLISM		32	0.134682	0.901886	0.56513	0.686373	1	2487	tags=38%, list=24%, signal=49%
KEGG_GLYCINE_SERINE_AND_THREONINE_METABOLISM		21	0.154146	0.850463	0.644578	0.760695	1	8252	tags=95%, list=80%, signal=472%
KEGG_GLIOMA		51	0.0997152	0.841198	0.671343	0.76324	1	4445	tags=53%, list=43%, signal=92%
KEGG_PPAR_SIGNALING_PATHWAY		37	0.116186	0.820279	0.685371	0.784155	1	4389	tags=54%, list=42%, signal=94%
KEGG_NON_SMALL_CELL_LUNG_CANCER		45	0.101393	0.811747	0.695296	0.784517	1	2171	tags=31%, list=21%, signal=39%
KEGG_VASCULAR_SMOOTH_MUSCLE_CONTRACTION		58	0.0898105	0.807869	0.702703	0.778524	1	2818	tags=36%, list=27%, signal=50%
KEGG_BASAL_TRANSCRIPTION_FACTORS		27	0.127075	0.784301	0.731006	0.802653	1	7493	tags=85%, list=73%, signal=309%
KEGG_REGULATION_OF_ACTIN_CYTOSKELETON		138	0.0552678	0.762884	0.739884	0.822069	1	3180	tags=36%, list=31%, signal=52%
KEGG_GALACTOSE_METABOLISM		21	0.131306	0.726719	0.8	0.858887	1	6519	tags=76%, list=63%, signal=206%
KEGG_OLFACTORY_TRANSDUCTION		15	0.147287	0.697205	0.858974	0.88511	1	3302	tags=47%, list=32%, signal=68%
KEGG_LYSINE_DEGRADATION		31	0.0943229	0.621025	0.915323	0.952428	1	6695	tags=74%, list=65%, signal=210%
KEGG_UBIQUITIN_MEDIATED_PROTEOLYSIS		116	0.0485387	0.618886	0.919679	0.940049	1	6096	tags=64%, list=59%, signal=154%
KEGG_PROSTATE_CANCER		70	0.0616867	0.601753	0.942623	0.940992	1	2171	tags=27%, list=21%, signal=34%

## Sheet: WT_IgM_vs_KO_IgM_KEGG_neg
NAME	GS DETAILS	SIZE	ES	NES	NOM p-val	FDR q-val	FWER p-val	RANK AT MAX	LEADING EDGE
KEGG_RIBOSOME	Details ...	53	-0.580724	-5.0177	0	0	0	2805	tags=85%, list=27%, signal=116%
KEGG_VIBRIO_CHOLERAE_INFECTION	Details ...	37	-0.33282	-2.42357	0	0.0147563	0.029	5512	tags=86%, list=53%, signal=185%
KEGG_B_CELL_RECEPTOR_SIGNALING_PATHWAY	Details ...	68	-0.24881	-2.3844	0	0.0127072	0.037	2310	tags=47%, list=22%, signal=60%
KEGG_LYSOSOME	Details ...	108	-0.188904	-2.31726	0.0020284	0.015374	0.059	4672	tags=64%, list=45%, signal=115%
KEGG_STEROID_BIOSYNTHESIS	Details ...	15	-0.490116	-2.30333	0	0.0134916	0.065	4589	tags=93%, list=44%, signal=168%
KEGG_GLYCOSAMINOGLYCAN_BIOSYNTHESIS_HEPARAN_SULFATE	Details ...	18	-0.421053	-2.15876	0.00213675	0.0274893	0.147	2547	tags=67%, list=25%, signal=88%
KEGG_EPITHELIAL_CELL_SIGNALING_IN_HELICOBACTER_PYLORI_INFECTION	Details ...	46	-0.250487	-2.07695	0.00394477	0.0362718	0.222	5512	tags=78%, list=53%, signal=167%
KEGG_NEUROTROPHIN_SIGNALING_PATHWAY	Details ...	103	-0.163386	-1.93339	0.00764818	0.078371	0.45	5052	tags=65%, list=49%, signal=126%
KEGG_APOPTOSIS	Details ...	74	-0.16677	-1.66341	0.0262626	0.282459	0.899	1502	tags=31%, list=15%, signal=36%
KEGG_TOLL_LIKE_RECEPTOR_SIGNALING_PATHWAY	Details ...	76	-0.159824	-1.65404	0.0341556	0.264955	0.914	2169	tags=37%, list=21%, signal=46%
KEGG_AMINOACYL_TRNA_BIOSYNTHESIS	Details ...	40	-0.223919	-1.65373	0.0344828	0.240967	0.914	7514	tags=95%, list=73%, signal=347%
KEGG_NEUROACTIVE_LIGAND_RECEPTOR_INTERACTION	Details ...	61	-0.176628	-1.62152	0.0445344	0.257491	0.945	1236	tags=30%, list=12%, signal=33%
KEGG_DORSO_VENTRAL_AXIS_FORMATION	Details ...	15	-0.33188	-1.6142	0.0471513	0.247928	0.951	4155	tags=73%, list=40%, signal=122%
KEGG_INSULIN_SIGNALING_PATHWAY	Details ...	107	-0.135311	-1.61278	0.0433071	0.231758	0.951	2384	tags=36%, list=23%, signal=47%
KEGG_MAPK_SIGNALING_PATHWAY	Details ...	184	-0.0959859	-1.5397	0.0524194	0.305626	0.984	4812	tags=56%, list=47%, signal=103%
KEGG_INTESTINAL_IMMUNE_NETWORK_FOR_IGA_PRODUCTION	Details ...	24	-0.251382	-1.45878	0.0715706	0.411239	0.997	854	tags=33%, list=8%, signal=36%
KEGG_ANTIGEN_PROCESSING_AND_PRESENTATION	Details ...	38	-0.198821	-1.45605	0.0845361	0.391492	0.997	5569	tags=74%, list=54%, signal=159%
KEGG_TRYPTOPHAN_METABOLISM	Details ...	24	-0.24526	-1.42569	0.0968379	0.417935	0.998	2209	tags=46%, list=21%, signal=58%
KEGG_PHOSPHATIDYLINOSITOL_SIGNALING_SYSTEM	Details ...	63	-0.151183	-1.40477	0.0934959	0.433415	0.998	1729	tags=32%, list=17%, signal=38%
KEGG_SPHINGOLIPID_METABOLISM	Details ...	29	-0.217222	-1.40366	0.101449	0.413398	0.998	3108	tags=52%, list=30%, signal=74%
KEGG_RENAL_CELL_CARCINOMA		58	-0.155174	-1.38891	0.128049	0.417173	0.999	6603	tags=79%, list=64%, signal=218%
KEGG_VEGF_SIGNALING_PATHWAY		54	-0.15922	-1.35993	0.115768	0.446604	1	6211	tags=76%, list=60%, signal=189%
KEGG_T_CELL_RECEPTOR_SIGNALING_PATHWAY		91	-0.122148	-1.34363	0.130693	0.456377	1	2384	tags=35%, list=23%, signal=45%
KEGG_GLYCOSYLPHOSPHATIDYLINOSITOL_GPI_ANCHOR_BIOSYNTHESIS		23	-0.234505	-1.33995	0.134809	0.443837	1	4323	tags=65%, list=42%, signal=112%
KEGG_GLYCOSAMINOGLYCAN_BIOSYNTHESIS_CHONDROITIN_SULFATE		18	-0.264208	-1.33192	0.159091	0.440599	1	3591	tags=61%, list=35%, signal=93%
KEGG_JAK_STAT_SIGNALING_PATHWAY		92	-0.114463	-1.28548	0.152941	0.508614	1	2311	tags=34%, list=22%, signal=43%
KEGG_PEROXISOME		64	-0.136849	-1.28121	0.160966	0.497237	1	8123	tags=92%, list=79%, signal=428%
KEGG_STARCH_AND_SUCROSE_METABOLISM		21	-0.227375	-1.24627	0.195876	0.543843	1	5038	tags=71%, list=49%, signal=139%
KEGG_FC_EPSILON_RI_SIGNALING_PATHWAY		57	-0.13861	-1.24035	0.216475	0.536099	1	2384	tags=37%, list=23%, signal=48%
KEGG_ERBB_SIGNALING_PATHWAY		67	-0.128645	-1.23198	0.218075	0.53461	1	5930	tags=70%, list=57%, signal=164%
KEGG_INOSITOL_PHOSPHATE_METABOLISM		47	-0.153457	-1.23157	0.216216	0.518251	1	3040	tags=45%, list=29%, signal=63%
KEGG_PROPANOATE_METABOLISM		26	-0.201135	-1.22869	0.196653	0.507311	1	7865	tags=96%, list=76%, signal=401%
KEGG_RIG_I_LIKE_RECEPTOR_SIGNALING_PATHWAY		48	-0.145068	-1.19316	0.231884	0.558106	1	2169	tags=35%, list=21%, signal=45%
KEGG_CALCIUM_SIGNALING_PATHWAY		84	-0.11117	-1.17743	0.254582	0.572682	1	953	tags=20%, list=9%, signal=22%
KEGG_REGULATION_OF_AUTOPHAGY		19	-0.23075	-1.17334	0.240891	0.564352	1	3604	tags=58%, list=35%, signal=89%
KEGG_RNA_DEGRADATION		52	-0.13622	-1.14833	0.279026	0.596134	1	7544	tags=87%, list=73%, signal=319%
KEGG_CYTOSOLIC_DNA_SENSING_PATHWAY		33	-0.168652	-1.13495	0.286	0.605918	1	7659	tags=91%, list=74%, signal=350%
KEGG_ALDOSTERONE_REGULATED_SODIUM_REABSORPTION		27	-0.177295	-1.13242	0.288577	0.595571	1	2384	tags=41%, list=23%, signal=53%
KEGG_NOTCH_SIGNALING_PATHWAY		43	-0.144849	-1.13178	0.297189	0.581499	1	433	tags=19%, list=4%, signal=19%
KEGG_LONG_TERM_POTENTIATION		47	-0.138211	-1.11187	0.316973	0.606734	1	4956	tags=62%, list=48%, signal=118%
KEGG_LEUKOCYTE_TRANSENDOTHELIAL_MIGRATION		74	-0.111509	-1.10152	0.327968	0.610603	1	3326	tags=43%, list=32%, signal=63%
KEGG_PYRUVATE_METABOLISM		31	-0.167141	-1.09196	0.3147	0.613774	1	7947	tags=94%, list=77%, signal=404%
KEGG_MTOR_SIGNALING_PATHWAY		43	-0.138215	-1.07506	0.355599	0.633436	1	6510	tags=77%, list=63%, signal=206%
KEGG_NATURAL_KILLER_CELL_MEDIATED_CYTOTOXICITY		77	-0.103505	-1.07212	0.345238	0.624539	1	1221	tags=22%, list=12%, signal=25%
KEGG_PANCREATIC_CANCER		60	-0.115961	-1.06223	0.338645	0.629987	1	1221	tags=23%, list=12%, signal=26%
KEGG_CYSTEINE_AND_METHIONINE_METABOLISM		25	-0.180155	-1.0526	0.397313	0.635312	1	2691	tags=44%, list=26%, signal=59%
KEGG_N_GLYCAN_BIOSYNTHESIS		39	-0.141803	-1.04861	0.390385	0.62961	1	6491	tags=77%, list=63%, signal=206%
KEGG_TYPE_I_DIABETES_MELLITUS		18	-0.202368	-1.04394	0.384289	0.625285	1	784	tags=28%, list=8%, signal=30%
KEGG_CHRONIC_MYELOID_LEUKEMIA		66	-0.110624	-1.02895	0.415418	0.64105	1	2310	tags=33%, list=22%, signal=43%
KEGG_GLYCOSAMINOGLYCAN_DEGRADATION		16	-0.209135	-1.00444	0.440079	0.674704	1	7532	tags=94%, list=73%, signal=345%
KEGG_PENTOSE_PHOSPHATE_PATHWAY		19	-0.189323	-0.976502	0.451807	0.715721	1	7839	tags=95%, list=76%, signal=392%
KEGG_FC_GAMMA_R_MEDIATED_PHAGOCYTOSIS		76	-0.0965237	-0.970873	0.464491	0.713007	1	6898	tags=76%, list=67%, signal=228%
KEGG_ENDOMETRIAL_CANCER		45	-0.119566	-0.947509	0.483806	0.74398	1	2675	tags=38%, list=26%, signal=51%
KEGG_BUTANOATE_METABOLISM		22	-0.166815	-0.942476	0.521484	0.739611	1	5797	tags=73%, list=56%, signal=165%
KEGG_ACUTE_MYELOID_LEUKEMIA		51	-0.110463	-0.942065	0.491228	0.726902	1	2310	tags=33%, list=22%, signal=43%
KEGG_FATTY_ACID_METABOLISM		32	-0.137245	-0.937236	0.528184	0.723193	1	8599	tags=97%, list=83%, signal=575%
KEGG_VALINE_LEUCINE_AND_ISOLEUCINE_DEGRADATION		39	-0.124417	-0.926327	0.544922	0.731309	1	7995	tags=90%, list=77%, signal=395%
KEGG_GLYCOLYSIS_GLUCONEOGENESIS		37	-0.126548	-0.920118	0.515464	0.730364	1	3167	tags=43%, list=31%, signal=62%
KEGG_GRAFT_VERSUS_HOST_DISEASE		15	-0.191182	-0.900564	0.58498	0.754645	1	784	tags=27%, list=8%, signal=29%
KEGG_AMYOTROPHIC_LATERAL_SCLEROSIS_ALS		39	-0.121892	-0.895441	0.596591	0.751142	1	1131	tags=23%, list=11%, signal=26%
KEGG_ADIPOCYTOKINE_SIGNALING_PATHWAY		51	-0.104634	-0.888872	0.608611	0.750396	1	8652	tags=94%, list=84%, signal=575%
KEGG_CHEMOKINE_SIGNALING_PATHWAY		118	-0.0688948	-0.885029	0.598441	0.745473	1	3326	tags=39%, list=32%, signal=57%
KEGG_LONG_TERM_DEPRESSION		37	-0.122102	-0.88186	0.574181	0.738831	1	6844	tags=78%, list=66%, signal=231%
KEGG_GNRH_SIGNALING_PATHWAY		64	-0.0948879	-0.878366	0.593117	0.733308	1	3225	tags=41%, list=31%, signal=59%
KEGG_ADHERENS_JUNCTION		52	-0.103253	-0.867815	0.586207	0.740034	1	3113	tags=40%, list=30%, signal=58%
KEGG_LEISHMANIA_INFECTION		52	-0.102548	-0.847122	0.630885	0.762785	1	1729	tags=27%, list=17%, signal=32%
KEGG_TYPE_II_DIABETES_MELLITUS		33	-0.122386	-0.837532	0.645094	0.766947	1	8762	tags=97%, list=85%, signal=635%
KEGG_VASOPRESSIN_REGULATED_WATER_REABSORPTION		37	-0.113323	-0.802524	0.710262	0.81468	1	9169	tags=100%, list=89%, signal=883%
KEGG_SNARE_INTERACTIONS_IN_VESICULAR_TRANSPORT		29	-0.124537	-0.791665	0.720322	0.820454	1	7627	tags=86%, list=74%, signal=328%
KEGG_WNT_SIGNALING_PATHWAY		99	-0.0682884	-0.788297	0.731141	0.814054	1	6192	tags=67%, list=60%, signal=165%
KEGG_BETA_ALANINE_METABOLISM		16	-0.153322	-0.716579	0.816116	0.907145	1	7462	tags=88%, list=72%, signal=314%
KEGG_PROTEIN_EXPORT		21	-0.124283	-0.681455	0.87451	0.940231	1	8562	tags=95%, list=83%, signal=554%
KEGG_COLORECTAL_CANCER		57	-0.0753526	-0.67655	0.852156	0.932883	1	1221	tags=19%, list=12%, signal=22%
KEGG_TIGHT_JUNCTION		68	-0.0675608	-0.654431	0.902439	0.944883	1	2955	tags=35%, list=29%, signal=49%
KEGG_NOD_LIKE_RECEPTOR_SIGNALING_PATHWAY		46	-0.0829611	-0.650468	0.901328	0.936237	1	7011	tags=76%, list=68%, signal=236%
KEGG_ABC_TRANSPORTERS		28	-0.0946409	-0.599171	0.956	0.968368	1	7515	tags=82%, list=73%, signal=300%
KEGG_TGF_BETA_SIGNALING_PATHWAY		50	-0.0722897	-0.598954	0.949698	0.955984	1	6492	tags=70%, list=63%, signal=187%
KEGG_VIRAL_MYOCARDITIS		34	-0.0811486	-0.566566	0.976143	0.963616	1	77	tags=9%, list=1%, signal=9%

## Sheet: WT_Both_vs_KO_Both_REACTOME_pos
NAME	GS DETAILS	SIZE	ES	NES	NOM p-val	FDR q-val	FWER p-val	RANK AT MAX	LEADING EDGE
REACTOME_CELL_CYCLE_MITOTIC	Details ...	448	0.26955	6.38557	0	0	0	4347	tags=68%, list=42%, signal=112%
REACTOME_MITOTIC_PROMETAPHASE	Details ...	181	0.399411	6.07752	0	0	0	4337	tags=81%, list=42%, signal=137%
REACTOME_CELL_CYCLE_CHECKPOINTS	Details ...	239	0.283257	5.11042	0	0	0	2977	tags=56%, list=29%, signal=78%
REACTOME_MITOTIC_SPINDLE_CHECKPOINT	Details ...	103	0.412247	5.0154	0	0	0	2604	tags=66%, list=25%, signal=87%
REACTOME_RESOLUTION_OF_SISTER_CHROMATID_COHESION	Details ...	109	0.404189	4.95653	0	0	0	2977	tags=69%, list=29%, signal=96%
REACTOME_M_PHASE	Details ...	317	0.23413	4.88106	0	0	0	4337	tags=65%, list=42%, signal=108%
REACTOME_AURKA_ACTIVATION_BY_TPX2	Details ...	70	0.440387	4.35326	0	0	0	4337	tags=86%, list=42%, signal=147%
REACTOME_ACTIVATION_OF_THE_PRE_REPLICATIVE_COMPLEX	Details ...	32	0.617408	4.22834	0	0	0	2358	tags=84%, list=23%, signal=109%
REACTOME_REGULATION_OF_PLK1_ACTIVITY_AT_G2_M_TRANSITION	Details ...	83	0.402773	4.22253	0	0	0	4337	tags=82%, list=42%, signal=140%
REACTOME_RECRUITMENT_OF_MITOTIC_CENTROSOME_PROTEINS_AND_COMPLEXES	Details ...	75	0.409903	4.18432	0	0	0	4337	tags=83%, list=42%, signal=141%
REACTOME_RECRUITMENT_OF_NUMA_TO_MITOTIC_CENTROSOMES	Details ...	82	0.385005	4.15524	0	0	0	4496	tags=82%, list=44%, signal=143%
REACTOME_ANCHORING_OF_THE_BASAL_BODY_TO_THE_PLASMA_MEMBRANE	Details ...	92	0.366129	4.15147	0	0	0	4337	tags=78%, list=42%, signal=134%
REACTOME_RHO_GTPASE_EFFECTORS	Details ...	222	0.234973	4.03881	0	0	0	2604	tags=48%, list=25%, signal=63%
REACTOME_DNA_STRAND_ELONGATION	Details ...	30	0.584862	3.86213	0	0	0	2929	tags=87%, list=28%, signal=121%
REACTOME_RHO_GTPASES_ACTIVATE_FORMINS	Details ...	117	0.306975	3.82616	0	0	0	2604	tags=56%, list=25%, signal=73%
REACTOME_DEPOSITION_OF_NEW_CENPA_CONTAINING_NUCLEOSOMES_AT_THE_CENTROMERE	Details ...	24	0.624394	3.67737	0	0	0	2604	tags=88%, list=25%, signal=117%
REACTOME_CHROMOSOME_MAINTENANCE	Details ...	81	0.344866	3.67285	0	0	0	2332	tags=57%, list=23%, signal=73%
REACTOME_SUMOYLATION	Details ...	143	0.254219	3.55339	0	0	0	3768	tags=62%, list=36%, signal=96%
REACTOME_MITOTIC_METAPHASE_AND_ANAPHASE	Details ...	207	0.209289	3.4924	0	0	0	2922	tags=49%, list=28%, signal=67%
REACTOME_RESOLUTION_OF_D_LOOP_STRUCTURES_THROUGH_SYNTHESIS_DEPENDENT_STRAND_ANNEALING_SDSA	Details ...	25	0.574956	3.49205	0	0	0	3166	tags=88%, list=31%, signal=127%
REACTOME_HDR_THROUGH_HOMOLOGOUS_RECOMBINATION_HRR		60	0.382847	3.48795	0	0	0	2094	tags=58%, list=20%, signal=73%
REACTOME_DNA_DOUBLE_STRAND_BREAK_REPAIR		118	0.272953	3.48407	0	0	0	3166	tags=58%, list=31%, signal=82%
REACTOME_SUMOYLATION_OF_DNA_DAMAGE_RESPONSE_AND_REPAIR_PROTEINS		66	0.349746	3.30335	0	0	0	4237	tags=76%, list=41%, signal=128%
REACTOME_RESOLUTION_OF_D_LOOP_STRUCTURES		31	0.501521	3.2977	0	0	0	3166	tags=81%, list=31%, signal=116%
REACTOME_SEPARATION_OF_SISTER_CHROMATIDS		168	0.221787	3.29541	0	0	0	2604	tags=47%, list=25%, signal=62%
REACTOME_HOMOLOGY_DIRECTED_REPAIR		91	0.289521	3.26641	0	0	0	3166	tags=59%, list=31%, signal=85%
REACTOME_HOMOLOGOUS_DNA_PAIRING_AND_STRAND_EXCHANGE		41	0.429111	3.22543	0	0	0	3396	tags=76%, list=33%, signal=112%
REACTOME_ACTIVATION_OF_ATR_IN_RESPONSE_TO_REPLICATION_STRESS		36	0.441685	3.20719	0	0	0	2053	tags=64%, list=20%, signal=79%
REACTOME_MITOTIC_G2_G2_M_PHASES		176	0.207833	3.16678	0	0	0	4347	tags=63%, list=42%, signal=106%
REACTOME_SUMOYLATION_OF_DNA_REPLICATION_PROTEINS		40	0.416549	3.15013	0	0	0	4237	tags=83%, list=41%, signal=139%
REACTOME_G2_M_DNA_DAMAGE_CHECKPOINT		57	0.344	3.04067	0	0	0	3716	tags=70%, list=36%, signal=109%
REACTOME_LAGGING_STRAND_SYNTHESIS		18	0.580046	2.9193	0	6.25186e-05	0.002	2053	tags=78%, list=20%, signal=97%
REACTOME_POLO_LIKE_KINASE_MEDIATED_EVENTS		15	0.632461	2.91708	0	6.06241e-05	0.002	3118	tags=93%, list=30%, signal=133%
REACTOME_CILIUM_ASSEMBLY		168	0.195582	2.89436	0	5.8841e-05	0.002	4839	tags=66%, list=47%, signal=122%
REACTOME_E2F_MEDIATED_REGULATION_OF_DNA_REPLICATION		21	0.519017	2.89131	0	5.71598e-05	0.002	2028	tags=71%, list=20%, signal=89%
REACTOME_POSTMITOTIC_NUCLEAR_PORE_COMPLEX_NPC_REFORMATION		23	0.504102	2.87513	0	8.36263e-05	0.003	4237	tags=91%, list=41%, signal=154%
REACTOME_G1_S_SPECIFIC_TRANSCRIPTION		26	0.473567	2.86938	0	8.13661e-05	0.003	2272	tags=69%, list=22%, signal=89%
REACTOME_DNA_REPLICATION		118	0.22345	2.85561	0	7.92249e-05	0.003	2358	tags=45%, list=23%, signal=58%
REACTOME_TELOMERE_C_STRAND_LAGGING_STRAND_SYNTHESIS		30	0.435856	2.84083	0	7.71935e-05	0.003	2053	tags=63%, list=20%, signal=79%
REACTOME_INTERACTIONS_OF_REV_WITH_HOST_CELLULAR_PROTEINS		30	0.424503	2.82367	0	9.9488e-05	0.004	4237	tags=83%, list=41%, signal=141%
REACTOME_G2_M_CHECKPOINTS		126	0.211107	2.77742	0	0.000193732	0.008	1945	tags=40%, list=19%, signal=48%
REACTOME_SUMOYLATION_OF_RNA_BINDING_PROTEINS		40	0.366355	2.74649	0.00191571	0.000214228	0.009	4237	tags=78%, list=41%, signal=131%
REACTOME_S_PHASE		151	0.191767	2.7397	0	0.000209246	0.009	2358	tags=42%, list=23%, signal=53%
REACTOME_MEIOSIS		48	0.333971	2.72564	0	0.00020449	0.009	4530	tags=77%, list=44%, signal=137%
REACTOME_TRANSPORT_OF_THE_SLBP_DEPENDANT_MATURE_MRNA		32	0.40989	2.69932	0	0.000264712	0.012	5142	tags=91%, list=50%, signal=180%
REACTOME_NUCLEAR_PORE_COMPLEX_NPC_DISASSEMBLY		32	0.403687	2.68929	0	0.000321844	0.015	4237	tags=81%, list=41%, signal=137%
REACTOME_REPRODUCTION		55	0.291042	2.62218	0	0.00046227	0.022	3396	tags=62%, list=33%, signal=92%
REACTOME_REGULATION_OF_HSF1_MEDIATED_HEAT_SHOCK_RESPONSE		68	0.274688	2.6127	0	0.000494205	0.024	5234	tags=78%, list=51%, signal=157%
REACTOME_SUMOYLATION_OF_CHROMATIN_ORGANIZATION_PROTEINS		49	0.326177	2.59933	0	0.000565529	0.027	4237	tags=73%, list=41%, signal=124%
REACTOME_TRANSCRIPTIONAL_REGULATION_BY_E2F6		32	0.387481	2.59461	0	0.000593181	0.029	4081	tags=78%, list=39%, signal=129%
REACTOME_NUCLEAR_IMPORT_OF_REV_PROTEIN		28	0.412483	2.58828	0	0.000621575	0.031	4237	tags=82%, list=41%, signal=139%
REACTOME_PROCESSING_OF_CAPPED_INTRON_CONTAINING_PRE_MRNA		214	0.154941	2.57471	0	0.000685096	0.035	4854	tags=62%, list=47%, signal=115%
REACTOME_G0_AND_EARLY_G1		25	0.421086	2.56677	0	0.000745007	0.039	2272	tags=64%, list=22%, signal=82%
REACTOME_SUMOYLATION_OF_SUMOYLATION_PROTEINS		30	0.391072	2.53737	0	0.000842299	0.044	4237	tags=80%, list=41%, signal=135%
REACTOME_PROCESSING_OF_DNA_DOUBLE_STRAND_BREAK_ENDS		56	0.284748	2.5198	0	0.000990443	0.053	3716	tags=64%, list=36%, signal=100%
REACTOME_EXTENSION_OF_TELOMERES		45	0.313735	2.51668	0	0.00100838	0.055	2053	tags=51%, list=20%, signal=64%
REACTOME_NS1_MEDIATED_EFFECTS_ON_HOST_PATHWAYS		35	0.362594	2.51466	0	0.00102587	0.057	4237	tags=77%, list=41%, signal=130%
REACTOME_TP53_REGULATES_TRANSCRIPTION_OF_CELL_CYCLE_GENES		44	0.32551	2.5064	0	0.00105919	0.059	3226	tags=64%, list=31%, signal=92%
REACTOME_MITOTIC_G1_PHASE_AND_G1_S_TRANSITION		139	0.173728	2.46589	0	0.00154749	0.089	2094	tags=37%, list=20%, signal=46%
REACTOME_EXPORT_OF_VIRAL_RIBONUCLEOPROTEINS_FROM_NUCLEUS		27	0.405812	2.45685	0	0.00160254	0.094	4237	tags=81%, list=41%, signal=138%
REACTOME_NUCLEAR_ENVELOPE_BREAKDOWN		48	0.299662	2.43125	0	0.00186495	0.112	4237	tags=71%, list=41%, signal=119%
REACTOME_REGULATION_OF_GLUCOKINASE_BY_GLUCOKINASE_REGULATORY_PROTEIN		26	0.398632	2.40134	0	0.00245585	0.145	4237	tags=81%, list=41%, signal=137%
REACTOME_ABERRANT_REGULATION_OF_MITOTIC_G1_S_TRANSITION_IN_CANCER_DUE_TO_RB1_DEFECTS		16	0.484077	2.39641	0	0.00255762	0.152	3401	tags=81%, list=33%, signal=121%
REACTOME_HDR_THROUGH_SINGLE_STRAND_ANNEALING_SSA		36	0.330186	2.37793	0	0.00281358	0.169	2053	tags=53%, list=20%, signal=66%
REACTOME_SLC_TRANSPORTER_DISORDERS		56	0.26382	2.35359	0.00191939	0.00329945	0.199	5223	tags=77%, list=51%, signal=154%
REACTOME_DISEASES_OF_MITOTIC_CELL_CYCLE		36	0.332993	2.33866	0	0.00356159	0.217	5182	tags=83%, list=50%, signal=167%
REACTOME_KINESINS		42	0.304146	2.3172	0	0.00426018	0.257	2282	tags=52%, list=22%, signal=67%
REACTOME_SUMOYLATION_OF_UBIQUITINYLATION_PROTEINS		34	0.340467	2.30794	0	0.00444456	0.269	5307	tags=85%, list=51%, signal=175%
REACTOME_HCMV_EARLY_EVENTS		60	0.250341	2.30422	0.00412371	0.00451042	0.276	5178	tags=75%, list=50%, signal=149%
REACTOME_PCNA_DEPENDENT_LONG_PATCH_BASE_EXCISION_REPAIR		19	0.42966	2.275	0.00200803	0.00557149	0.335	2094	tags=63%, list=20%, signal=79%
REACTOME_CELLULAR_RESPONSE_TO_HEAT_STRESS		84	0.209001	2.25861	0.00194175	0.00604724	0.36	6346	tags=82%, list=61%, signal=211%
REACTOME_MITOTIC_PROPHASE		74	0.220425	2.21476	0	0.00797745	0.451	4441	tags=65%, list=43%, signal=113%
REACTOME_POLYMERASE_SWITCHING_ON_THE_C_STRAND_OF_THE_TELOMERE		22	0.393004	2.19968	0.0020284	0.00869759	0.477	2053	tags=59%, list=20%, signal=74%
REACTOME_RHOV_GTPASE_CYCLE		29	0.34288	2.19276	0	0.00887691	0.489	4662	tags=79%, list=45%, signal=144%
REACTOME_ACTIVATION_OF_NMDA_RECEPTORS_AND_POSTSYNAPTIC_EVENTS		61	0.227415	2.18646	0.0040404	0.00919744	0.503	5795	tags=79%, list=56%, signal=178%
REACTOME_MEIOTIC_RECOMBINATION		23	0.379448	2.17433	0	0.00973169	0.521	2377	tags=61%, list=23%, signal=79%
REACTOME_NEUROTRANSMITTER_RECEPTORS_AND_POSTSYNAPTIC_SIGNAL_TRANSMISSION		102	0.185145	2.17291	0.00390625	0.00970968	0.524	5805	tags=75%, list=56%, signal=168%
REACTOME_CYCLIN_A_B1_B2_ASSOCIATED_EVENTS_DURING_G2_M_TRANSITION		23	0.375051	2.16783	0	0.0099052	0.535	1973	tags=57%, list=19%, signal=70%
REACTOME_FACTORS_INVOLVED_IN_MEGAKARYOCYTE_DEVELOPMENT_AND_PLATELET_PRODUCTION		107	0.178585	2.15681	0.00392157	0.0106365	0.562	5320	tags=69%, list=51%, signal=141%
REACTOME_INTERACTIONS_OF_VPR_WITH_HOST_CELLULAR_PROTEINS		32	0.315849	2.14162	0.0040404	0.0113951	0.586	5142	tags=81%, list=50%, signal=161%
REACTOME_TELOMERE_MAINTENANCE		58	0.233603	2.14141	0	0.0112785	0.587	2053	tags=43%, list=20%, signal=53%
REACTOME_TRANSPORT_OF_MATURE_MRNAS_DERIVED_FROM_INTRONLESS_TRANSCRIPTS		38	0.292921	2.13467	0.00205339	0.0117869	0.61	5142	tags=79%, list=50%, signal=157%
REACTOME_RHOB_GTPASE_CYCLE		53	0.24966	2.12788	0.00197239	0.0122315	0.628	1137	tags=36%, list=11%, signal=40%
REACTOME_ORGANELLE_BIOGENESIS_AND_MAINTENANCE		247	0.119991	2.12368	0.00203252	0.0123239	0.637	5818	tags=68%, list=56%, signal=152%
REACTOME_TRANSPORT_OF_MATURE_TRANSCRIPT_TO_CYTOPLASM		70	0.212602	2.10771	0.00400802	0.0137418	0.682	3870	tags=59%, list=37%, signal=93%
REACTOME_PKMTS_METHYLATE_HISTONE_LYSINES		36	0.297942	2.09994	0.00436681	0.0143464	0.701	5543	tags=83%, list=54%, signal=179%
REACTOME_TRANSCRIPTION_OF_E2F_TARGETS_UNDER_NEGATIVE_CONTROL_BY_P107_RBL1_AND_P130_RBL2_IN_COMPLEX_WITH_HDAC1		15	0.447384	2.09434	0.00194932	0.0148276	0.715	2272	tags=67%, list=22%, signal=85%
REACTOME_REGULATION_OF_TP53_ACTIVITY_THROUGH_PHOSPHORYLATION		81	0.19787	2.0787	0.00381679	0.0160447	0.742	2053	tags=40%, list=20%, signal=49%
REACTOME_RECOGNITION_OF_DNA_DAMAGE_BY_PCNA_CONTAINING_REPLICATION_COMPLEX		27	0.32513	2.0618	0.00591716	0.0178253	0.786	2772	tags=59%, list=27%, signal=81%
REACTOME_MEIOTIC_SYNAPSIS		26	0.344844	2.05944	0.00603622	0.0178591	0.789	4394	tags=77%, list=43%, signal=133%
REACTOME_MRNA_SPLICING		169	0.136011	2.05451	0.0100604	0.018291	0.8	4854	tags=60%, list=47%, signal=112%
REACTOME_NONHOMOLOGOUS_END_JOINING_NHEJ		32	0.303343	2.0096	0.00192308	0.022987	0.877	3656	tags=66%, list=35%, signal=101%
REACTOME_PROCESSIVE_SYNTHESIS_ON_THE_C_STRAND_OF_THE_TELOMERE		17	0.412135	1.99662	0.00401606	0.0243475	0.892	1826	tags=59%, list=18%, signal=71%
REACTOME_HEMOSTASIS		396	0.0827982	1.98151	0.00381679	0.0263292	0.916	2073	tags=28%, list=20%, signal=34%
REACTOME_RUNX1_INTERACTS_WITH_CO_FACTORS_WHOSE_PRECISE_EFFECT_ON_RUNX1_TARGETS_IS_NOT_KNOWN		34	0.286697	1.96951	0.0148305	0.027912	0.933	4645	tags=74%, list=45%, signal=133%
REACTOME_DNA_DAMAGE_TELOMERE_STRESS_INDUCED_SENESCENCE		27	0.316313	1.96866	0.00566038	0.0277427	0.934	4394	tags=74%, list=43%, signal=129%
REACTOME_SIGNALING_BY_GPCR		286	0.102172	1.95298	0.00607287	0.0298638	0.948	4465	tags=53%, list=43%, signal=91%
REACTOME_CELLULAR_SENESCENCE		121	0.151522	1.95236	0.00747664	0.0296914	0.948	5199	tags=65%, list=50%, signal=130%
REACTOME_DNA_REPAIR		254	0.10561	1.93709	0.00806452	0.0321107	0.961	3166	tags=41%, list=31%, signal=58%
REACTOME_RESOLUTION_OF_AP_SITES_VIA_THE_MULTIPLE_NUCLEOTIDE_PATCH_REPLACEMENT_PATHWAY		22	0.343476	1.92987	0.0117417	0.0330945	0.968	2094	tags=55%, list=20%, signal=68%
REACTOME_REGULATION_OF_INSULIN_LIKE_GROWTH_FACTOR_IGF_TRANSPORT_AND_UPTAKE_BY_INSULIN_LIKE_GROWTH_FACTOR_BINDING_PROTEINS_IGFBPS		48	0.232071	1.92341	0.00809717	0.0339273	0.972	4717	tags=69%, list=46%, signal=126%
REACTOME_RND3_GTPASE_CYCLE		32	0.287425	1.92241	0.0144928	0.0337415	0.972	3820	tags=66%, list=37%, signal=104%
REACTOME_HCMV_INFECTION		78	0.181632	1.90328	0.0120968	0.0374711	0.98	4496	tags=62%, list=44%, signal=108%
REACTOME_DNA_REPLICATION_PRE_INITIATION		80	0.181613	1.89322	0.0104822	0.0387933	0.983	1883	tags=36%, list=18%, signal=44%
REACTOME_FORMATION_OF_FIBRIN_CLOT_CLOTTING_CASCADE		20	0.350969	1.88942	0.00574713	0.0394529	0.986	2063	tags=55%, list=20%, signal=69%
REACTOME_RHO_GTPASES_ACTIVATE_PKNS		27	0.306267	1.88509	0.0153551	0.0398517	0.988	3732	tags=67%, list=36%, signal=104%
REACTOME_RHOBTB1_GTPASE_CYCLE		22	0.325569	1.88265	0.0135922	0.0400993	0.989	3688	tags=68%, list=36%, signal=106%
REACTOME_TRANSPORT_OF_BILE_SALTS_AND_ORGANIC_ACIDS_METAL_IONS_AND_AMINE_COMPOUNDS		43	0.236399	1.86619	0.00784314	0.0433951	0.994	3094	tags=53%, list=30%, signal=76%
REACTOME_G_PROTEIN_MEDIATED_EVENTS		38	0.258737	1.85806	0.00598802	0.0448649	0.994	5494	tags=79%, list=53%, signal=168%
REACTOME_REGULATION_OF_TP53_ACTIVITY		140	0.133171	1.81272	0.0134875	0.0567437	0.999	3735	tags=49%, list=36%, signal=76%
REACTOME_RND2_GTPASE_CYCLE		35	0.256241	1.81198	0.0174757	0.0563741	0.999	3856	tags=63%, list=37%, signal=100%
REACTOME_TNFS_BIND_THEIR_PHYSIOLOGICAL_RECEPTORS		19	0.34086	1.80244	0.0194384	0.0587811	1	3554	tags=68%, list=34%, signal=104%
REACTOME_RHOC_GTPASE_CYCLE		57	0.201672	1.78559	0.0147992	0.0633729	1	3547	tags=54%, list=34%, signal=82%
REACTOME_TRANSMISSION_ACROSS_CHEMICAL_SYNAPSES		135	0.134346	1.78263	0.0272537	0.0638077	1	5289	tags=64%, list=51%, signal=130%
REACTOME_SUMOYLATION_OF_DNA_METHYLATION_PROTEINS		15	0.383818	1.77239	0.0134875	0.0668538	1	3617	tags=73%, list=35%, signal=113%
REACTOME_ESR_MEDIATED_SIGNALING		123	0.138899	1.77018	0.0169811	0.0670669	1	3538	tags=48%, list=34%, signal=72%
REACTOME_TRANSCRIPTIONAL_REGULATION_BY_SMALL_RNAS		41	0.230757	1.75853	0.0273438	0.0705632	1	5942	tags=80%, list=57%, signal=189%
REACTOME_GENE_SILENCING_BY_RNA		57	0.197985	1.74647	0.0266393	0.074387	1	5942	tags=77%, list=57%, signal=181%
REACTOME_RHO_GTPASE_CYCLE		351	0.0816417	1.74214	0.020284	0.0753698	1	2040	tags=28%, list=20%, signal=33%
REACTOME_SNRNP_ASSEMBLY		45	0.214415	1.73975	0.024948	0.0756616	1	5142	tags=71%, list=50%, signal=141%
REACTOME_BASE_EXCISION_REPAIR		41	0.225516	1.71435	0.0164948	0.0854409	1	2719	tags=49%, list=26%, signal=66%
REACTOME_GAP_FILLING_DNA_REPAIR_SYNTHESIS_AND_LIGATION_IN_GG_NER		22	0.297925	1.71382	0.0295858	0.0850539	1	2094	tags=50%, list=20%, signal=63%
REACTOME_NUCLEAR_ENVELOPE_NE_REASSEMBLY		61	0.188943	1.71376	0.0342857	0.0844026	1	4496	tags=62%, list=44%, signal=110%
REACTOME_RHO_GTPASES_ACTIVATE_PAKS		16	0.353934	1.71141	0.0336634	0.0847105	1	4098	tags=75%, list=40%, signal=124%
REACTOME_TP53_REGULATES_TRANSCRIPTION_OF_GENES_INVOLVED_IN_G2_CELL_CYCLE_ARREST		17	0.343124	1.69803	0.035865	0.0899504	1	3146	tags=65%, list=30%, signal=93%
REACTOME_TRANSCRIPTION_OF_E2F_TARGETS_UNDER_NEGATIVE_CONTROL_BY_DREAM_COMPLEX		18	0.336209	1.69011	0.0311284	0.0927643	1	2272	tags=56%, list=22%, signal=71%
REACTOME_CLASS_B_2_SECRETIN_FAMILY_RECEPTORS		30	0.254343	1.68462	0.0310559	0.094407	1	1512	tags=40%, list=15%, signal=47%
REACTOME_INTEGRIN_CELL_SURFACE_INTERACTIONS		40	0.220471	1.66161	0.0382294	0.104735	1	2380	tags=45%, list=23%, signal=58%
REACTOME_CA_DEPENDENT_EVENTS		26	0.2767	1.65705	0.0139442	0.106144	1	5494	tags=81%, list=53%, signal=172%
REACTOME_GLYCOLYSIS		60	0.180389	1.65602	0.0197628	0.105794	1	5380	tags=70%, list=52%, signal=145%
REACTOME_RAC1_GTPASE_CYCLE		147	0.117862	1.64999	0.0357853	0.108168	1	1962	tags=31%, list=19%, signal=37%
REACTOME_RHO_GTPASES_ACTIVATE_CIT		15	0.349031	1.64976	0.0105708	0.107498	1	2598	tags=60%, list=25%, signal=80%
REACTOME_INTRINSIC_PATHWAY_FOR_APOPTOSIS		46	0.205447	1.64135	0.045098	0.111112	1	3502	tags=54%, list=34%, signal=82%
REACTOME_INHIBITION_OF_THE_PROTEOLYTIC_ACTIVITY_OF_APC_C_REQUIRED_FOR_THE_ONSET_OF_ANAPHASE_BY_MITOTIC_SPINDLE_CHECKPOINT_COMPONENTS		20	0.303417	1.63703	0.0365591	0.112853	1	5654	tags=85%, list=55%, signal=187%
REACTOME_RESOLUTION_OF_ABASIC_SITES_AP_SITES		34	0.237598	1.63454	0.0352941	0.113406	1	2719	tags=50%, list=26%, signal=68%
REACTOME_PYRUVATE_METABOLISM		24	0.279968	1.62597	0.0432099	0.117723	1	6586	tags=92%, list=64%, signal=252%
REACTOME_EXTRACELLULAR_MATRIX_ORGANIZATION		129	0.122903	1.62321	0.0453608	0.118472	1	2430	tags=36%, list=24%, signal=46%
REACTOME_NCAM_SIGNALING_FOR_NEURITE_OUT_GROWTH		34	0.230974	1.6146	0.0615385	0.122296	1	5219	tags=74%, list=50%, signal=148%
REACTOME_CA2_PATHWAY		43	0.20707	1.6127	0.0440252	0.122477	1	5559	tags=74%, list=54%, signal=160%
REACTOME_INITIATION_OF_NUCLEAR_ENVELOPE_NE_REFORMATION		19	0.30482	1.60764	0.0374016	0.124657	1	1750	tags=47%, list=17%, signal=57%
REACTOME_ADORA2B_MEDIATED_ANTI_INFLAMMATORY_CYTOKINES_PRODUCTION		43	0.20862	1.60192	0.0482897	0.12696	1	4822	tags=67%, list=47%, signal=126%
REACTOME_CONVERSION_FROM_APC_C_CDC20_TO_APC_C_CDH1_IN_LATE_ANAPHASE		19	0.295479	1.60059	0.0302419	0.126786	1	5654	tags=84%, list=55%, signal=186%
REACTOME_PHOSPHORYLATION_OF_THE_APC_C		19	0.302004	1.59899	0.0468432	0.126915	1	2323	tags=53%, list=22%, signal=68%
REACTOME_REGULATION_OF_CHOLESTEROL_BIOSYNTHESIS_BY_SREBP_SREBF		51	0.192961	1.59692	0.0533881	0.127221	1	4094	tags=59%, list=40%, signal=97%
REACTOME_CHOLESTEROL_BIOSYNTHESIS		23	0.277368	1.58733	0.0622568	0.132386	1	3879	tags=65%, list=38%, signal=104%
REACTOME_ANTIMICROBIAL_PEPTIDES		21	0.278914	1.58698	0.0400802	0.131684	1	3028	tags=57%, list=29%, signal=81%
REACTOME_HCMV_LATE_EVENTS		44	0.204444	1.58688	0.0425101	0.130842	1	4237	tags=61%, list=41%, signal=104%
REACTOME_RHOBTB_GTPASE_CYCLE		34	0.232056	1.58217	0.0595745	0.132786	1	3688	tags=59%, list=36%, signal=91%
REACTOME_VIRAL_MESSENGER_RNA_SYNTHESIS		38	0.215229	1.57952	0.0483559	0.133652	1	5942	tags=79%, list=57%, signal=185%
REACTOME_GLUCAGON_SIGNALING_IN_METABOLIC_REGULATION		19	0.305279	1.57801	0.0505263	0.133745	1	4465	tags=74%, list=43%, signal=129%
REACTOME_ESTROGEN_DEPENDENT_GENE_EXPRESSION		76	0.151429	1.5595	0.0483193	0.14502	1	3477	tags=49%, list=34%, signal=73%
REACTOME_CREB1_PHOSPHORYLATION_THROUGH_NMDA_RECEPTOR_MEDIATED_ACTIVATION_OF_RAS_SIGNALING		19	0.29878	1.5555	0.0596154	0.146708	1	5076	tags=79%, list=49%, signal=155%
REACTOME_ABERRANT_REGULATION_OF_MITOTIC_EXIT_IN_CANCER_DUE_TO_RB1_DEFECTS		19	0.295479	1.55148	0.0618557	0.148475	1	5654	tags=84%, list=55%, signal=186%
REACTOME_CHROMATIN_MODIFYING_ENZYMES		185	0.0990467	1.54791	0.0643154	0.149898	1	7541	tags=83%, list=73%, signal=300%
REACTOME_TRANSCRIPTIONAL_REGULATION_OF_GRANULOPOIESIS		30	0.238234	1.52881	0.0444915	0.162935	1	3056	tags=53%, list=30%, signal=76%
REACTOME_ASSEMBLY_OF_COLLAGEN_FIBRILS_AND_OTHER_MULTIMERIC_STRUCTURES		17	0.301666	1.52798	0.0708333	0.162424	1	1142	tags=41%, list=11%, signal=46%
REACTOME_RUNX1_REGULATES_GENES_INVOLVED_IN_MEGAKARYOCYTE_DIFFERENTIATION_AND_PLATELET_FUNCTION		34	0.217969	1.51965	0.0585859	0.16717	1	5049	tags=71%, list=49%, signal=138%
REACTOME_RHO_GTPASES_ACTIVATE_IQGAPS		23	0.26111	1.51266	0.0767677	0.171538	1	4496	tags=70%, list=44%, signal=123%
REACTOME_THE_PHOTOTRANSDUCTION_CASCADE		16	0.313614	1.50802	0.0766208	0.173941	1	5160	tags=81%, list=50%, signal=162%
REACTOME_DAG_AND_IP3_SIGNALING		30	0.235662	1.50475	0.0740741	0.175505	1	5494	tags=77%, list=53%, signal=163%
REACTOME_NRAGE_SIGNALS_DEATH_THROUGH_JNK		45	0.190217	1.50025	0.0734694	0.17793	1	4013	tags=58%, list=39%, signal=94%
REACTOME_TRANSLESION_SYNTHESIS_BY_POLH		17	0.310075	1.49512	0.0769231	0.180502	1	3487	tags=65%, list=34%, signal=97%
REACTOME_DEREGULATED_CDK5_TRIGGERS_MULTIPLE_NEURODEGENERATIVE_PATHWAYS_IN_ALZHEIMER_S_DISEASE_MODELS		19	0.282484	1.49368	0.0759754	0.180574	1	6332	tags=89%, list=61%, signal=231%
REACTOME_NEURONAL_SYSTEM		180	0.0947399	1.49123	0.0816733	0.181365	1	7592	tags=83%, list=73%, signal=306%
REACTOME_HSP90_CHAPERONE_CYCLE_FOR_STEROID_HORMONE_RECEPTORS_SHR		41	0.199387	1.48983	0.0711462	0.1814	1	6517	tags=83%, list=63%, signal=224%
REACTOME_FANCONI_ANEMIA_PATHWAY		31	0.224867	1.48339	0.0737052	0.185444	1	2016	tags=42%, list=20%, signal=52%
REACTOME_PRE_NOTCH_EXPRESSION_AND_PROCESSING		46	0.181549	1.47502	0.0882353	0.191315	1	7118	tags=87%, list=69%, signal=278%
REACTOME_ANTIVIRAL_MECHANISM_BY_IFN_STIMULATED_GENES		70	0.148083	1.4678	0.0942623	0.196137	1	4237	tags=56%, list=41%, signal=94%
REACTOME_TRANSCRIPTIONAL_REGULATION_BY_VENTX		36	0.203677	1.46507	0.0733198	0.197284	1	7088	tags=89%, list=69%, signal=282%
REACTOME_NON_INTEGRIN_MEMBRANE_ECM_INTERACTIONS		31	0.224457	1.46473	0.086785	0.196386	1	2687	tags=48%, list=26%, signal=65%
REACTOME_G_ALPHA_12_13_SIGNALLING_EVENTS		56	0.166082	1.45877	0.0644531	0.199943	1	4013	tags=55%, list=39%, signal=90%
REACTOME_RHOU_GTPASE_CYCLE		28	0.232713	1.45736	0.0857741	0.199925	1	6459	tags=86%, list=62%, signal=228%
REACTOME_ACTIVATION_OF_BH3_ONLY_PROTEINS		26	0.238578	1.45495	0.0967118	0.200835	1	3502	tags=58%, list=34%, signal=87%
REACTOME_RND1_GTPASE_CYCLE		33	0.211318	1.45353	0.0778443	0.200865	1	4712	tags=67%, list=46%, signal=122%
REACTOME_APOPTOTIC_EXECUTION_PHASE		39	0.197164	1.44281	0.108108	0.208843	1	1944	tags=38%, list=19%, signal=47%
REACTOME_STRIATED_MUSCLE_CONTRACTION		19	0.273081	1.4367	0.0856031	0.212999	1	6429	tags=89%, list=62%, signal=236%
REACTOME_INTERCONVERSION_OF_NUCLEOTIDE_DI_AND_TRIPHOSPHATES		24	0.242387	1.4334	0.0930233	0.214671	1	5251	tags=75%, list=51%, signal=152%
REACTOME_DNA_DAMAGE_BYPASS		42	0.183384	1.43215	0.0901639	0.214613	1	3525	tags=52%, list=34%, signal=79%
REACTOME_BASIGIN_INTERACTIONS		17	0.283519	1.4318	0.11022	0.213744	1	3761	tags=65%, list=36%, signal=102%
REACTOME_EXTRA_NUCLEAR_ESTROGEN_SIGNALING		49	0.176223	1.43035	0.0928433	0.213786	1	4303	tags=59%, list=42%, signal=101%
REACTOME_RHOA_GTPASE_CYCLE		112	0.114879	1.41172	0.0909091	0.230091	1	1962	tags=30%, list=19%, signal=37%
REACTOME_HSF1_ACTIVATION		22	0.253956	1.40513	0.108317	0.234883	1	3487	tags=59%, list=34%, signal=89%
REACTOME_APC_CDC20_MEDIATED_DEGRADATION_OF_NEK2A		24	0.23401	1.39625	0.0979592	0.242583	1	2323	tags=46%, list=22%, signal=59%
REACTOME_SIGNALING_BY_BRAF_AND_RAF_FUSIONS		55	0.159392	1.39215	0.121399	0.245421	1	7568	tags=89%, list=73%, signal=331%
REACTOME_RORA_ACTIVATES_GENE_EXPRESSION		16	0.285014	1.36256	0.1079	0.275143	1	6747	tags=94%, list=65%, signal=270%
REACTOME_REGULATION_OF_RUNX1_EXPRESSION_AND_ACTIVITY		17	0.267881	1.36098	0.10303	0.275302	1	7570	tags=100%, list=73%, signal=373%
REACTOME_TRAFFICKING_OF_AMPA_RECEPTORS		18	0.265775	1.35874	0.129225	0.276464	1	7592	tags=100%, list=73%, signal=376%
REACTOME_G_PROTEIN_BETA_GAMMA_SIGNALLING		24	0.228918	1.35564	0.12	0.278449	1	4098	tags=63%, list=40%, signal=103%
REACTOME_REGULATION_OF_MECP2_EXPRESSION_AND_ACTIVITY		28	0.209857	1.35185	0.142857	0.281181	1	8171	tags=100%, list=79%, signal=476%
REACTOME_NETRIN_1_SIGNALING		30	0.206453	1.34521	0.130081	0.287108	1	5795	tags=77%, list=56%, signal=174%
REACTOME_ACTIVATION_OF_KAINATE_RECEPTORS_UPON_GLUTAMATE_BINDING		17	0.275276	1.34265	0.125253	0.288585	1	4454	tags=71%, list=43%, signal=124%
REACTOME_OPIOID_SIGNALLING		63	0.144855	1.34204	0.141393	0.287806	1	5237	tags=65%, list=51%, signal=131%
REACTOME_SIGNALING_BY_NUCLEAR_RECEPTORS		165	0.0893001	1.34087	0.140845	0.287689	1	3538	tags=43%, list=34%, signal=64%
REACTOME_ONCOGENIC_MAPK_SIGNALING		70	0.136949	1.33986	0.119923	0.287254	1	6123	tags=73%, list=59%, signal=178%
REACTOME_SUMOYLATION_OF_TRANSCRIPTION_COFACTORS		37	0.186654	1.33217	0.122	0.294069	1	3384	tags=51%, list=33%, signal=76%
REACTOME_DISEASES_OF_PROGRAMMED_CELL_DEATH		38	0.189825	1.33004	0.140725	0.294891	1	1852	tags=37%, list=18%, signal=45%
REACTOME_MYOGENESIS		19	0.251673	1.32666	0.126214	0.297371	1	5018	tags=74%, list=49%, signal=143%
REACTOME_METABOLISM_OF_STEROIDS		92	0.116162	1.32527	0.143137	0.297588	1	4426	tags=54%, list=43%, signal=94%
REACTOME_SIGNALING_BY_FLT3_FUSION_PROTEINS		18	0.256195	1.32517	0.15507	0.296216	1	4820	tags=72%, list=47%, signal=135%
REACTOME_ACTIVATION_OF_GENE_EXPRESSION_BY_SREBF_SREBP		40	0.179468	1.32422	0.143737	0.295823	1	4094	tags=58%, list=40%, signal=95%
REACTOME_DNA_DOUBLE_STRAND_BREAK_RESPONSE		38	0.180006	1.32396	0.166333	0.294607	1	3041	tags=47%, list=29%, signal=67%
REACTOME_RHOF_GTPASE_CYCLE		34	0.191264	1.3184	0.158228	0.299316	1	6236	tags=79%, list=60%, signal=200%
REACTOME_RUNX2_REGULATES_BONE_DEVELOPMENT		19	0.24701	1.31519	0.151402	0.301615	1	6154	tags=84%, list=60%, signal=208%
REACTOME_GLUCOSE_METABOLISM		74	0.129239	1.3141	0.164032	0.301341	1	5237	tags=64%, list=51%, signal=128%
REACTOME_CYCLIN_D_ASSOCIATED_EVENTS_IN_G1		42	0.16718	1.31247	0.145631	0.301779	1	7875	tags=93%, list=76%, signal=389%
REACTOME_APOPTOTIC_FACTOR_MEDIATED_RESPONSE		16	0.26063	1.30521	0.144269	0.308825	1	3123	tags=56%, list=30%, signal=80%
REACTOME_RHOBTB2_GTPASE_CYCLE		22	0.234466	1.2976	0.163934	0.315937	1	3688	tags=59%, list=36%, signal=92%
REACTOME_ATTENUATION_PHASE		19	0.249327	1.29143	0.172816	0.322063	1	7218	tags=95%, list=70%, signal=314%
REACTOME_REGULATION_OF_INSULIN_SECRETION		48	0.160591	1.29085	0.165323	0.321279	1	5237	tags=67%, list=51%, signal=135%
REACTOME_ACTIVATION_OF_ANTERIOR_HOX_GENES_IN_HINDBRAIN_DEVELOPMENT_DURING_EARLY_EMBRYOGENESIS		46	0.156687	1.28289	0.155512	0.329795	1	3105	tags=46%, list=30%, signal=65%
REACTOME_HIV_LIFE_CYCLE		125	0.101798	1.2803	0.178357	0.331682	1	7393	tags=82%, list=72%, signal=283%
REACTOME_BILE_ACID_AND_BILE_SALT_METABOLISM		17	0.264905	1.27424	0.181443	0.337903	1	4561	tags=71%, list=44%, signal=126%
REACTOME_PROTEIN_PROTEIN_INTERACTIONS_AT_SYNAPSES		36	0.177849	1.26497	0.1841	0.348491	1	3909	tags=56%, list=38%, signal=89%
REACTOME_TERMINATION_OF_TRANSLESION_DNA_SYNTHESIS		27	0.205234	1.26085	0.170683	0.352256	1	2094	tags=41%, list=20%, signal=51%
REACTOME_APC_C_CDC20_MEDIATED_DEGRADATION_OF_CYCLIN_B		22	0.230168	1.25663	0.181637	0.356242	1	2323	tags=45%, list=22%, signal=59%
REACTOME_TP53_REGULATES_TRANSCRIPTION_OF_ADDITIONAL_CELL_CYCLE_GENES_WHOSE_EXACT_ROLE_IN_THE_P53_PATHWAY_REMAIN_UNCERTAIN		18	0.24374	1.24762	0.193858	0.366688	1	3226	tags=56%, list=31%, signal=81%
REACTOME_MUSCLE_CONTRACTION		84	0.113243	1.24513	0.191617	0.367998	1	5236	tags=62%, list=51%, signal=124%
REACTOME_G_ALPHA_Z_SIGNALLING_EVENTS		26	0.203318	1.24226	0.175649	0.369961	1	1878	tags=38%, list=18%, signal=47%
REACTOME_DEADENYLATION_OF_MRNA		21	0.225422	1.2399	0.201271	0.371388	1	8009	tags=100%, list=77%, signal=443%
REACTOME_ADP_SIGNALLING_THROUGH_P2Y_PURINOCEPTOR_1		16	0.254615	1.23981	0.21	0.369825	1	3831	tags=63%, list=37%, signal=99%
REACTOME_REGULATION_OF_LIPID_METABOLISM_BY_PPARALPHA		99	0.103002	1.22992	0.209486	0.381802	1	6983	tags=78%, list=68%, signal=238%
REACTOME_GLUCAGON_LIKE_PEPTIDE_1_GLP1_REGULATES_INSULIN_SECRETION		27	0.197398	1.22926	0.197556	0.38094	1	5237	tags=70%, list=51%, signal=142%
REACTOME_RHOD_GTPASE_CYCLE		40	0.164461	1.22147	0.218688	0.389938	1	1148	tags=28%, list=11%, signal=31%
REACTOME_APOPTOTIC_CLEAVAGE_OF_CELLULAR_PROTEINS		30	0.18394	1.22017	0.24	0.389953	1	1204	tags=30%, list=12%, signal=34%
REACTOME_DEGRADATION_OF_THE_EXTRACELLULAR_MATRIX		53	0.142871	1.21757	0.221311	0.391891	1	2430	tags=38%, list=24%, signal=49%
REACTOME_RHOQ_GTPASE_CYCLE		48	0.149327	1.21065	0.211297	0.399889	1	7506	tags=88%, list=73%, signal=318%
REACTOME_RMTS_METHYLATE_HISTONE_ARGININES		28	0.193842	1.20866	0.226908	0.401149	1	4645	tags=64%, list=45%, signal=116%
REACTOME_G_BETA_GAMMA_SIGNALLING_THROUGH_PI3KGAMMA		18	0.240752	1.20805	0.218504	0.400275	1	3831	tags=61%, list=37%, signal=97%
REACTOME_ACTIVATION_OF_BAD_AND_TRANSLOCATION_TO_MITOCHONDRIA		15	0.261434	1.20273	0.25	0.406029	1	3502	tags=60%, list=34%, signal=91%
REACTOME_CDC42_GTPASE_CYCLE		124	0.0934421	1.20072	0.237525	0.406988	1	1962	tags=28%, list=19%, signal=34%
REACTOME_ASSEMBLY_AND_CELL_SURFACE_PRESENTATION_OF_NMDA_RECEPTORS		24	0.209764	1.19836	0.239919	0.408394	1	6018	tags=79%, list=58%, signal=189%
REACTOME_RHOJ_GTPASE_CYCLE		45	0.14898	1.19182	0.247899	0.416285	1	5356	tags=67%, list=52%, signal=138%
REACTOME_TRANSLESION_SYNTHESIS_BY_Y_FAMILY_DNA_POLYMERASES_BYPASSES_LESIONS_ON_DNA_TEMPLATE		33	0.174538	1.18676	0.247401	0.421994	1	3525	tags=52%, list=34%, signal=78%
REACTOME_SIGNALING_BY_VEGF		92	0.104285	1.18608	0.227612	0.421273	1	4997	tags=59%, list=48%, signal=113%
REACTOME_L1CAM_INTERACTIONS		76	0.119434	1.1845	0.25498	0.421848	1	6253	tags=72%, list=61%, signal=182%
REACTOME_SIGNALING_BY_NTRK2_TRKB		19	0.229082	1.17358	0.252525	0.436111	1	5795	tags=79%, list=56%, signal=179%
REACTOME_CHEMOKINE_RECEPTORS_BIND_CHEMOKINES		22	0.211485	1.16844	0.252525	0.442157	1	3925	tags=59%, list=38%, signal=95%
REACTOME_ION_TRANSPORT_BY_P_TYPE_ATPASES		32	0.171158	1.16659	0.247265	0.443117	1	4049	tags=56%, list=39%, signal=92%
REACTOME_REGULATION_OF_KIT_SIGNALING		15	0.244864	1.16353	0.264188	0.445918	1	2295	tags=47%, list=22%, signal=60%
REACTOME_ECM_PROTEOGLYCANS		24	0.198708	1.16106	0.253579	0.447974	1	2687	tags=46%, list=26%, signal=62%
REACTOME_TRANSLESION_SYNTHESIS_BY_POLK		16	0.234174	1.1531	0.264344	0.458264	1	3396	tags=56%, list=33%, signal=84%
REACTOME_METABOLISM_OF_NUCLEOTIDES		79	0.11098	1.15302	0.262195	0.456536	1	2393	tags=34%, list=23%, signal=44%
REACTOME_CELL_JUNCTION_ORGANIZATION		39	0.153458	1.14679	0.264113	0.463841	1	2659	tags=41%, list=26%, signal=55%
REACTOME_RHOG_GTPASE_CYCLE		59	0.126837	1.14502	0.293522	0.464733	1	1148	tags=24%, list=11%, signal=27%
REACTOME_VASOPRESSIN_REGULATES_RENAL_WATER_HOMEOSTASIS_VIA_AQUAPORINS		26	0.183723	1.14104	0.284783	0.468963	1	4465	tags=62%, list=43%, signal=108%
REACTOME_RHO_GTPASES_ACTIVATE_ROCKS		15	0.239147	1.1367	0.274319	0.474019	1	3732	tags=60%, list=36%, signal=94%
REACTOME_BMAL1_CLOCK_NPAS2_ACTIVATES_CIRCADIAN_GENE_EXPRESSION		20	0.212651	1.13176	0.312757	0.479879	1	7107	tags=90%, list=69%, signal=288%
REACTOME_TRANSCRIPTION_OF_THE_HIV_GENOME		59	0.125031	1.13175	0.298851	0.477956	1	7823	tags=88%, list=76%, signal=361%
REACTOME_THROMBIN_SIGNALLING_THROUGH_PROTEINASE_ACTIVATED_RECEPTORS_PARS		21	0.207346	1.12745	0.310838	0.482894	1	6719	tags=86%, list=65%, signal=244%
REACTOME_SYNTHESIS_OF_BILE_ACIDS_AND_BILE_SALTS		15	0.247481	1.12685	0.307385	0.481932	1	3646	tags=60%, list=35%, signal=93%
REACTOME_SIGNALING_BY_PDGFR_IN_DISEASE		17	0.23099	1.12538	0.300971	0.482321	1	4303	tags=65%, list=42%, signal=111%
REACTOME_ANTI_INFLAMMATORY_RESPONSE_FAVOURING_LEISHMANIA_PARASITE_INFECTION		67	0.116131	1.12181	0.320158	0.486101	1	6365	tags=73%, list=62%, signal=189%
REACTOME_RNA_POLYMERASE_II_TRANSCRIBES_SNRNA_GENES		68	0.114953	1.11967	0.297872	0.487617	1	6874	tags=78%, list=67%, signal=231%
REACTOME_COLLAGEN_FORMATION		28	0.175595	1.10892	0.321083	0.502808	1	1142	tags=29%, list=11%, signal=32%
REACTOME_VEGFR2_MEDIATED_CELL_PROLIFERATION		18	0.217344	1.10144	0.338552	0.513153	1	5795	tags=78%, list=56%, signal=177%
REACTOME_SMOOTH_MUSCLE_CONTRACTION		20	0.204435	1.10058	0.309198	0.512469	1	4608	tags=65%, list=45%, signal=117%
REACTOME_TP53_REGULATES_TRANSCRIPTION_OF_DNA_REPAIR_GENES		55	0.123505	1.0964	0.312245	0.51722	1	7749	tags=87%, list=75%, signal=347%
REACTOME_SIGNALING_BY_BMP		15	0.235756	1.09367	0.327968	0.51963	1	6523	tags=87%, list=63%, signal=235%
REACTOME_CELL_DEATH_SIGNALLING_VIA_NRAGE_NRIF_AND_NADE		60	0.120584	1.08971	0.331418	0.524187	1	1516	tags=27%, list=15%, signal=31%
REACTOME_COLLAGEN_BIOSYNTHESIS_AND_MODIFYING_ENZYMES		19	0.205572	1.08789	0.305284	0.525277	1	1142	tags=32%, list=11%, signal=35%
REACTOME_SEMAPHORIN_INTERACTIONS		48	0.134162	1.08471	0.339468	0.528656	1	4217	tags=54%, list=41%, signal=91%
REACTOME_DEADENYLATION_DEPENDENT_MRNA_DECAY		51	0.124408	1.08305	0.361345	0.529218	1	8244	tags=92%, list=80%, signal=453%
REACTOME_TRNA_PROCESSING_IN_THE_NUCLEUS		50	0.130569	1.08042	0.33	0.531482	1	4237	tags=54%, list=41%, signal=91%
REACTOME_INTEGRATION_OF_ENERGY_METABOLISM		70	0.108197	1.07148	0.347561	0.544555	1	5237	tags=61%, list=51%, signal=124%
REACTOME_EGFR_DOWNREGULATION		19	0.201782	1.06726	0.37251	0.549554	1	2269	tags=42%, list=22%, signal=54%
REACTOME_MAPK_TARGETS_NUCLEAR_EVENTS_MEDIATED_BY_MAP_KINASES		29	0.168466	1.05952	0.373308	0.560468	1	5034	tags=66%, list=49%, signal=127%
REACTOME_GABA_RECEPTOR_ACTIVATION		24	0.177068	1.05494	0.376543	0.566074	1	4202	tags=58%, list=41%, signal=98%
REACTOME_MET_PROMOTES_CELL_MOTILITY		25	0.176857	1.05331	0.368201	0.566608	1	2723	tags=44%, list=26%, signal=60%
REACTOME_AGGREPHAGY		29	0.16335	1.05266	0.381048	0.565601	1	7225	tags=86%, list=70%, signal=286%
REACTOME_NEUROTRANSMITTER_RELEASE_CYCLE		25	0.173695	1.0523	0.390295	0.564027	1	3169	tags=48%, list=31%, signal=69%
REACTOME_PRE_NOTCH_PROCESSING_IN_GOLGI		16	0.225234	1.05158	0.387033	0.563188	1	6072	tags=81%, list=59%, signal=197%
REACTOME_COLLAGEN_DEGRADATION		21	0.18923	1.05094	0.389452	0.562235	1	7398	tags=90%, list=72%, signal=318%
REACTOME_FLT3_SIGNALING_IN_DISEASE		25	0.173948	1.04583	0.369231	0.568904	1	4820	tags=64%, list=47%, signal=120%
REACTOME_GOLGI_TO_ER_RETROGRADE_TRANSPORT		108	0.0879643	1.04215	0.407186	0.573065	1	2353	tags=31%, list=23%, signal=40%
REACTOME_CELL_CELL_JUNCTION_ORGANIZATION		23	0.1778	1.03887	0.387914	0.57655	1	2659	tags=43%, list=26%, signal=58%
REACTOME_G_ALPHA_S_SIGNALLING_EVENTS		49	0.126286	1.03641	0.373469	0.578727	1	6504	tags=76%, list=63%, signal=203%
REACTOME_SIGNALING_BY_MET		55	0.118889	1.0361	0.361868	0.577251	1	2535	tags=36%, list=25%, signal=48%
REACTOME_OXIDATIVE_STRESS_INDUCED_SENESCENCE		60	0.114185	1.03516	0.382066	0.576646	1	5199	tags=62%, list=50%, signal=123%
REACTOME_SIGNALING_BY_FGFR2		49	0.12456	1.03291	0.39596	0.578451	1	5889	tags=69%, list=57%, signal=161%
REACTOME_INOSITOL_PHOSPHATE_METABOLISM		36	0.145742	1.03212	0.39501	0.577753	1	5388	tags=67%, list=52%, signal=139%
REACTOME_SIGNALING_BY_CYTOSOLIC_FGFR1_FUSION_MUTANTS		17	0.210477	1.02986	0.394059	0.579503	1	867	tags=29%, list=8%, signal=32%
REACTOME_GPCR_LIGAND_BINDING		124	0.0771811	1.02721	0.392354	0.581913	1	1878	tags=26%, list=18%, signal=31%
REACTOME_VEGFR2_MEDIATED_VASCULAR_PERMEABILITY		24	0.173419	1.02467	0.382294	0.584325	1	3809	tags=54%, list=37%, signal=86%
REACTOME_SWITCHING_OF_ORIGINS_TO_A_POST_REPLICATIVE_STATE		84	0.0953914	1.02447	0.427975	0.582566	1	1974	tags=29%, list=19%, signal=35%
REACTOME_NEPHRIN_FAMILY_INTERACTIONS		16	0.213011	1.01673	0.430928	0.593205	1	7490	tags=94%, list=72%, signal=340%
REACTOME_MAP2K_AND_MAPK_ACTIVATION		34	0.150482	1.01656	0.418327	0.591398	1	7568	tags=88%, list=73%, signal=328%
REACTOME_FCGR3A_MEDIATED_IL10_SYNTHESIS		28	0.160401	1.01537	0.430303	0.591322	1	6097	tags=75%, list=59%, signal=182%
REACTOME_AMINO_ACID_TRANSPORT_ACROSS_THE_PLASMA_MEMBRANE		21	0.181889	1.01201	0.411178	0.59508	1	8458	tags=100%, list=82%, signal=549%
REACTOME_PLATELET_HOMEOSTASIS		50	0.118804	1.01072	0.421456	0.595189	1	2291	tags=34%, list=22%, signal=43%
REACTOME_TRANSCRIPTIONAL_REGULATION_BY_TP53		318	0.0495657	1.00887	0.423459	0.596602	1	6880	tags=71%, list=67%, signal=207%
REACTOME_DOWNSTREAM_SIGNALING_OF_ACTIVATED_FGFR1		16	0.208874	1.00438	0.417879	0.602165	1	4303	tags=63%, list=42%, signal=107%
REACTOME_SENESCENCE_ASSOCIATED_SECRETORY_PHENOTYPE_SASP		47	0.123149	0.99912	0.440501	0.609299	1	7088	tags=81%, list=69%, signal=256%
REACTOME_HATS_ACETYLATE_HISTONES		74	0.100613	0.998794	0.427083	0.607757	1	7486	tags=82%, list=72%, signal=297%
REACTOME_SYNTHESIS_OF_PC		18	0.196149	0.998523	0.455285	0.606115	1	3717	tags=56%, list=36%, signal=87%
REACTOME_CD209_DC_SIGN_SIGNALING		18	0.195002	0.9967	0.441057	0.607225	1	4303	tags=61%, list=42%, signal=105%
REACTOME_MAPK_FAMILY_SIGNALING_CASCADES		237	0.0558865	0.996201	0.435484	0.606001	1	8287	tags=86%, list=80%, signal=422%
REACTOME_SYNTHESIS_OF_PIPS_AT_THE_PLASMA_MEMBRANE		48	0.121549	0.996002	0.43301	0.604311	1	5208	tags=63%, list=50%, signal=125%
REACTOME_INTERLEUKIN_37_SIGNALING		17	0.198893	0.994679	0.46988	0.604602	1	6458	tags=82%, list=62%, signal=219%
REACTOME_AQUAPORIN_MEDIATED_TRANSPORT		27	0.160889	0.990552	0.488565	0.609757	1	4465	tags=59%, list=43%, signal=104%
REACTOME_HDMS_DEMETHYLATE_HISTONES		21	0.175365	0.977276	0.456604	0.630797	1	7541	tags=90%, list=73%, signal=334%
REACTOME_TRANSLOCATION_OF_SLC2A4_GLUT4_TO_THE_PLASMA_MEMBRANE		58	0.109696	0.974247	0.470588	0.634034	1	6712	tags=76%, list=65%, signal=215%
REACTOME_SLC_MEDIATED_TRANSMEMBRANE_TRANSPORT		131	0.0720216	0.973744	0.463855	0.632789	1	3761	tags=44%, list=36%, signal=68%
REACTOME_RAC3_GTPASE_CYCLE		75	0.0964522	0.973627	0.447876	0.630891	1	2730	tags=36%, list=26%, signal=49%
REACTOME_SIGNALING_BY_FGFR1		32	0.144378	0.965469	0.471058	0.642846	1	3356	tags=47%, list=32%, signal=69%
REACTOME_COPI_DEPENDENT_GOLGI_TO_ER_RETROGRADE_TRAFFIC		77	0.0937286	0.959907	0.504638	0.650509	1	7225	tags=79%, list=70%, signal=261%
REACTOME_COPI_INDEPENDENT_GOLGI_TO_ER_RETROGRADE_TRAFFIC		41	0.126353	0.956273	0.464491	0.654925	1	4496	tags=56%, list=44%, signal=99%
REACTOME_ESTROGEN_DEPENDENT_NUCLEAR_EVENTS_DOWNSTREAM_OF_ESR_MEMBRANE_SIGNALING		16	0.200631	0.953786	0.495918	0.65716	1	5034	tags=69%, list=49%, signal=134%
REACTOME_VISUAL_PHOTOTRANSDUCTION		42	0.121358	0.949913	0.493952	0.66163	1	2687	tags=38%, list=26%, signal=51%
REACTOME_EPIGENETIC_REGULATION_OF_GENE_EXPRESSION		83	0.0903978	0.949269	0.53493	0.660626	1	4302	tags=51%, list=42%, signal=86%
REACTOME_PLATELET_CALCIUM_HOMEOSTASIS		18	0.185713	0.936256	0.519841	0.681885	1	4973	tags=67%, list=48%, signal=128%
REACTOME_RAC2_GTPASE_CYCLE		73	0.0940977	0.934513	0.546939	0.682926	1	1157	tags=21%, list=11%, signal=23%
REACTOME_ADRENALINE_NORADRENALINE_INHIBITS_INSULIN_SECRETION		16	0.19349	0.927049	0.529175	0.694131	1	1878	tags=38%, list=18%, signal=46%
REACTOME_PHOSPHOLIPID_METABOLISM		152	0.0640755	0.926015	0.513185	0.69396	1	4718	tags=52%, list=46%, signal=94%
REACTOME_SIGNALING_BY_FLT3_ITD_AND_TKD_MUTANTS		15	0.200485	0.923684	0.536145	0.695999	1	4820	tags=67%, list=47%, signal=125%
REACTOME_INTRA_GOLGI_AND_RETROGRADE_GOLGI_TO_ER_TRAFFIC		169	0.0616611	0.918367	0.557411	0.7033	1	7261	tags=76%, list=70%, signal=252%
REACTOME_RHOH_GTPASE_CYCLE		31	0.136436	0.91806	0.560636	0.701651	1	7928	tags=90%, list=77%, signal=387%
REACTOME_ATF4_ACTIVATES_GENES_IN_RESPONSE_TO_ENDOPLASMIC_RETICULUM_STRESS		24	0.156168	0.91486	0.528046	0.705119	1	6140	tags=75%, list=59%, signal=184%
REACTOME_HIV_TRANSCRIPTION_INITIATION		40	0.119524	0.909317	0.574803	0.712332	1	8070	tags=90%, list=78%, signal=409%
REACTOME_ONCOGENE_INDUCED_SENESCENCE		31	0.136007	0.906274	0.578846	0.715565	1	3265	tags=45%, list=32%, signal=66%
REACTOME_SIGNALING_BY_FGFR		55	0.103369	0.904282	0.578035	0.716695	1	5889	tags=67%, list=57%, signal=156%
REACTOME_BETA_CATENIN_PHOSPHORYLATION_CASCADE		16	0.189166	0.902918	0.552361	0.716914	1	8382	tags=100%, list=81%, signal=528%
REACTOME_SIGNALING_BY_SCF_KIT		37	0.124537	0.902563	0.569498	0.715346	1	4303	tags=54%, list=42%, signal=92%
REACTOME_P75_NTR_RECEPTOR_MEDIATED_SIGNALLING		78	0.0846251	0.900883	0.571146	0.716195	1	1516	tags=23%, list=15%, signal=27%
REACTOME_G_ALPHA_Q_SIGNALLING_EVENTS		93	0.0804625	0.900432	0.571429	0.714845	1	5287	tags=59%, list=51%, signal=120%
REACTOME_SYNDECAN_INTERACTIONS		18	0.174776	0.892984	0.576238	0.725734	1	2215	tags=39%, list=21%, signal=49%
REACTOME_SIGNALING_BY_MODERATE_KINASE_ACTIVITY_BRAF_MUTANTS		38	0.118412	0.890086	0.607495	0.728694	1	6123	tags=71%, list=59%, signal=174%
REACTOME_PEPTIDE_LIGAND_BINDING_RECEPTORS		52	0.105271	0.887857	0.610526	0.73041	1	8059	tags=88%, list=78%, signal=400%
REACTOME_BINDING_AND_UPTAKE_OF_LIGANDS_BY_SCAVENGER_RECEPTORS		15	0.185271	0.887269	0.587302	0.729354	1	7044	tags=87%, list=68%, signal=272%
REACTOME_SIGNALING_BY_CTNNB1_PHOSPHO_SITE_MUTANTS		15	0.189147	0.886702	0.577603	0.728225	1	8382	tags=100%, list=81%, signal=528%
REACTOME_SIGNALING_BY_WNT		202	0.0550954	0.884718	0.608268	0.729575	1	7985	tags=83%, list=77%, signal=356%
REACTOME_SIGNALING_BY_FGFR4		27	0.143265	0.881785	0.577381	0.732504	1	5795	tags=70%, list=56%, signal=160%
REACTOME_FATTY_ACYL_COA_BIOSYNTHESIS		20	0.165366	0.878119	0.612326	0.736647	1	7078	tags=85%, list=68%, signal=269%
REACTOME_POTENTIAL_THERAPEUTICS_FOR_SARS		69	0.0894807	0.878107	0.595285	0.734462	1	7618	tags=83%, list=74%, signal=312%
REACTOME_TRANSCRIPTIONAL_REGULATION_BY_THE_AP_2_TFAP2_FAMILY_OF_TRANSCRIPTION_FACTORS		19	0.165583	0.871802	0.621181	0.743113	1	6994	tags=84%, list=68%, signal=260%
REACTOME_INSULIN_PROCESSING		17	0.169527	0.869736	0.636364	0.744549	1	6761	tags=82%, list=65%, signal=238%
REACTOME_TRIGLYCERIDE_METABOLISM		17	0.172942	0.866003	0.598485	0.748677	1	4294	tags=59%, list=42%, signal=100%
REACTOME_SIGNALING_BY_ERBB2_IN_CANCER		17	0.173831	0.864232	0.591954	0.749547	1	2461	tags=41%, list=24%, signal=54%
REACTOME_BASE_EXCISION_REPAIR_AP_SITE_FORMATION		16	0.18105	0.860414	0.611973	0.753685	1	5882	tags=75%, list=57%, signal=174%
REACTOME_DOWNSTREAM_SIGNALING_OF_ACTIVATED_FGFR3		15	0.186822	0.860291	0.628405	0.751687	1	5650	tags=73%, list=55%, signal=162%
REACTOME_SYNTHESIS_OF_IP3_AND_IP4_IN_THE_CYTOSOL		19	0.163078	0.853694	0.638037	0.760434	1	5388	tags=68%, list=52%, signal=143%
REACTOME_NUCLEOTIDE_SALVAGE		18	0.166053	0.850573	0.641176	0.763853	1	2305	tags=39%, list=22%, signal=50%
REACTOME_ION_HOMEOSTASIS		29	0.129811	0.840532	0.645291	0.778551	1	5076	tags=62%, list=49%, signal=122%
REACTOME_FGFR1_MUTANT_RECEPTOR_ACTIVATION		21	0.154423	0.831862	0.663244	0.790893	1	867	tags=24%, list=8%, signal=26%
REACTOME_SIGNALING_BY_EGFR		37	0.113538	0.8307	0.680982	0.790557	1	2461	tags=35%, list=24%, signal=46%
REACTOME_ELASTIC_FIBRE_FORMATION		16	0.173182	0.830335	0.66129	0.788875	1	7901	tags=94%, list=76%, signal=397%
REACTOME_CIRCADIAN_CLOCK		57	0.0929835	0.829901	0.649606	0.787342	1	5752	tags=65%, list=56%, signal=146%
REACTOME_HSF1_DEPENDENT_TRANSACTIVATION		26	0.135707	0.829603	0.658586	0.785559	1	7345	tags=85%, list=71%, signal=292%
REACTOME_NEUREXINS_AND_NEUROLIGINS		23	0.144049	0.828555	0.638945	0.784969	1	1659	tags=30%, list=16%, signal=36%
REACTOME_SIGNALING_BY_NTRK3_TRKC		15	0.172771	0.824449	0.689524	0.789681	1	5795	tags=73%, list=56%, signal=167%
REACTOME_SIGNALING_BY_FGFR1_IN_DISEASE		28	0.12794	0.820873	0.693387	0.793266	1	7908	tags=89%, list=77%, signal=379%
REACTOME_APC_C_MEDIATED_DEGRADATION_OF_CELL_CYCLE_PROTEINS		80	0.0775353	0.817788	0.686235	0.796095	1	2046	tags=28%, list=20%, signal=34%
REACTOME_FGFR2_ALTERNATIVE_SPLICING		21	0.144672	0.811842	0.700611	0.803347	1	5889	tags=71%, list=57%, signal=166%
REACTOME_TELOMERE_EXTENSION_BY_TELOMERASE		21	0.150531	0.809463	0.706122	0.805143	1	7305	tags=86%, list=71%, signal=292%
REACTOME_SIGNALING_BY_RETINOIC_ACID		22	0.144663	0.807979	0.706827	0.805337	1	6963	tags=82%, list=67%, signal=250%
REACTOME_PLATELET_ACTIVATION_SIGNALING_AND_AGGREGATION		179	0.0510505	0.804681	0.711297	0.808338	1	4215	tags=46%, list=41%, signal=76%
REACTOME_EPHB_MEDIATED_FORWARD_SIGNALING		33	0.120109	0.799654	0.712	0.814121	1	6278	tags=73%, list=61%, signal=185%
REACTOME_TRANSCRIPTIONAL_REGULATION_BY_MECP2		41	0.105143	0.798857	0.730924	0.813126	1	6983	tags=78%, list=68%, signal=240%
REACTOME_FCERI_MEDIATED_MAPK_ACTIVATION		30	0.12329	0.793295	0.727092	0.819599	1	5963	tags=70%, list=58%, signal=165%
REACTOME_SIGNAL_TRANSDUCTION_BY_L1		18	0.155342	0.7837	0.723711	0.832248	1	693	tags=22%, list=7%, signal=24%
REACTOME_METALLOPROTEASE_DUBS		16	0.161274	0.779266	0.740741	0.836882	1	6732	tags=81%, list=65%, signal=233%
REACTOME_GABA_B_RECEPTOR_ACTIVATION		22	0.139074	0.777396	0.754601	0.837515	1	4202	tags=55%, list=41%, signal=92%
REACTOME_SIGNALING_BY_PDGF		33	0.113888	0.772656	0.713415	0.842256	1	7908	tags=88%, list=77%, signal=373%
REACTOME_SYNTHESIS_OF_ACTIVE_UBIQUITIN_ROLES_OF_E1_AND_E2_ENZYMES		28	0.123186	0.772382	0.753036	0.840398	1	7957	tags=89%, list=77%, signal=387%
REACTOME_G_ALPHA_I_SIGNALLING_EVENTS		127	0.0590528	0.769293	0.785714	0.842955	1	4523	tags=50%, list=44%, signal=87%
REACTOME_SYNTHESIS_OF_PA		20	0.143093	0.768858	0.779497	0.841318	1	8858	tags=100%, list=86%, signal=698%
REACTOME_LEISHMANIA_INFECTION		146	0.0538796	0.763329	0.771784	0.847354	1	6458	tags=68%, list=62%, signal=178%
REACTOME_SYNTHESIS_OF_GLYCOSYLPHOSPHATIDYLINOSITOL_GPI		17	0.152258	0.76224	0.79065	0.846591	1	8763	tags=100%, list=85%, signal=656%
REACTOME_PERK_REGULATES_GENE_EXPRESSION		28	0.120418	0.760445	0.788136	0.846977	1	6140	tags=71%, list=59%, signal=175%
REACTOME_INTERLEUKIN_4_AND_INTERLEUKIN_13_SIGNALING		79	0.0736105	0.757309	0.767578	0.849198	1	8140	tags=86%, list=79%, signal=402%
REACTOME_THROMBOXANE_SIGNALLING_THROUGH_TP_RECEPTOR		15	0.158915	0.753554	0.790875	0.852488	1	3871	tags=53%, list=37%, signal=85%
REACTOME_GLYCEROPHOSPHOLIPID_BIOSYNTHESIS		78	0.0726821	0.751951	0.788187	0.852657	1	4686	tags=53%, list=45%, signal=95%
REACTOME_SIGNALING_BY_FGFR3		28	0.118079	0.746066	0.794118	0.858944	1	5795	tags=68%, list=56%, signal=154%
REACTOME_PLATELET_SENSITIZATION_BY_LDL		16	0.153467	0.744628	0.776	0.858736	1	2291	tags=38%, list=22%, signal=48%
REACTOME_SIGNALING_BY_PTK6		42	0.0955781	0.740482	0.8	0.86217	1	1722	tags=26%, list=17%, signal=31%
REACTOME_MRNA_DECAY_BY_5_TO_3_EXORIBONUCLEASE		15	0.155814	0.738885	0.791075	0.862318	1	4592	tags=60%, list=44%, signal=108%
REACTOME_NUCLEOBASE_BIOSYNTHESIS		15	0.156202	0.730035	0.801527	0.872405	1	8033	tags=93%, list=78%, signal=418%
REACTOME_SYNTHESIS_OF_PIPS_AT_THE_EARLY_ENDOSOME_MEMBRANE		16	0.150541	0.727494	0.810101	0.873705	1	4259	tags=56%, list=41%, signal=96%
REACTOME_SIGNAL_AMPLIFICATION		22	0.125618	0.721706	0.828452	0.879352	1	3871	tags=50%, list=37%, signal=80%
REACTOME_REGULATION_OF_TP53_EXPRESSION_AND_DEGRADATION		34	0.102569	0.719364	0.840074	0.880116	1	3502	tags=44%, list=34%, signal=67%
REACTOME_SENSORY_PROCESSING_OF_SOUND_BY_OUTER_HAIR_CELLS_OF_THE_COCHLEA		24	0.12009	0.709598	0.817814	0.890473	1	6512	tags=75%, list=63%, signal=202%
REACTOME_CYTOCHROME_P450_ARRANGED_BY_SUBSTRATE_TYPE		19	0.135763	0.708717	0.821218	0.889338	1	3494	tags=47%, list=34%, signal=71%
REACTOME_PROTEIN_UBIQUITINATION		57	0.0797513	0.69982	0.857724	0.89832	1	9333	tags=98%, list=90%, signal=1008%
REACTOME_NICOTINATE_METABOLISM		21	0.125405	0.694879	0.858527	0.902233	1	182	tags=14%, list=2%, signal=15%
REACTOME_RNA_POLYMERASE_II_TRANSCRIPTION_TERMINATION		56	0.0773804	0.687193	0.860041	0.90943	1	4002	tags=46%, list=39%, signal=75%
REACTOME_RESPONSE_TO_ELEVATED_PLATELET_CYTOSOLIC_CA2		84	0.0613982	0.681645	0.857426	0.913821	1	4168	tags=46%, list=40%, signal=77%
REACTOME_INWARDLY_RECTIFYING_K_CHANNELS		15	0.140116	0.66391	0.883365	0.931647	1	4065	tags=53%, list=39%, signal=88%
REACTOME_REGULATION_OF_BETA_CELL_DEVELOPMENT		17	0.13186	0.656879	0.885542	0.936613	1	3502	tags=47%, list=34%, signal=71%
REACTOME_TRANSCRIPTIONAL_REGULATION_BY_RUNX1		154	0.0444628	0.643091	0.912602	0.948181	1	9076	tags=92%, list=88%, signal=746%
REACTOME_SENSORY_PERCEPTION		84	0.0591894	0.64102	0.926625	0.947894	1	1976	tags=25%, list=19%, signal=31%
REACTOME_COOPERATION_OF_PDCL_PHLP1_AND_TRIC_CCT_IN_G_PROTEIN_BETA_FOLDING		25	0.108109	0.640925	0.887352	0.945542	1	8806	tags=96%, list=85%, signal=647%
REACTOME_SEMA4D_IN_SEMAPHORIN_SIGNALING		18	0.123744	0.629008	0.92955	0.95441	1	4464	tags=56%, list=43%, signal=98%
REACTOME_CARDIAC_CONDUCTION		50	0.0736315	0.622353	0.940329	0.957829	1	5236	tags=58%, list=51%, signal=117%
REACTOME_FORMATION_OF_THE_BETA_CATENIN_TCF_TRANSACTIVATING_COMPLEX		30	0.093935	0.620595	0.935818	0.956894	1	4543	tags=53%, list=44%, signal=95%
REACTOME_ERK_MAPK_TARGETS		21	0.105058	0.596863	0.949318	0.973422	1	4329	tags=52%, list=42%, signal=90%
REACTOME_METAL_ION_SLC_TRANSPORTERS		23	0.104956	0.596551	0.93865	0.971203	1	8353	tags=91%, list=81%, signal=475%
REACTOME_DUAL_INCISION_IN_GG_NER		36	0.0828883	0.593118	0.939394	0.971154	1	8332	tags=89%, list=81%, signal=457%
REACTOME_CTLA4_INHIBITORY_SIGNALING		21	0.105058	0.59278	0.950495	0.968955	1	4329	tags=52%, list=42%, signal=90%
REACTOME_SENSORY_PROCESSING_OF_SOUND		36	0.0833091	0.591283	0.969819	0.967561	1	9476	tags=100%, list=92%, signal=1199%
REACTOME_NEGATIVE_REGULATION_OF_FGFR2_SIGNALING		17	0.115686	0.577066	0.958932	0.974398	1	2453	tags=35%, list=24%, signal=46%
REACTOME_NEGATIVE_REGULATION_OF_FGFR4_SIGNALING		17	0.115686	0.576088	0.965049	0.972553	1	2453	tags=35%, list=24%, signal=46%
REACTOME_SIGNALING_BY_KIT_IN_DISEASE		19	0.110069	0.571232	0.946939	0.972889	1	4303	tags=53%, list=42%, signal=90%
REACTOME_NOTCH3_INTRACELLULAR_DOMAIN_REGULATES_TRANSCRIPTION		17	0.117282	0.560144	0.959267	0.976531	1	7908	tags=88%, list=77%, signal=375%
REACTOME_DOWNSTREAM_SIGNAL_TRANSDUCTION		26	0.089485	0.546633	0.963249	0.980623	1	5834	tags=65%, list=56%, signal=150%
REACTOME_HEME_SIGNALING		39	0.0730381	0.539527	0.980658	0.981314	1	5872	tags=64%, list=57%, signal=148%
REACTOME_CARGO_CONCENTRATION_IN_THE_ER		22	0.0845799	0.47036	0.994	0.997047	1	4764	tags=55%, list=46%, signal=101%
REACTOME_RAF_INDEPENDENT_MAPK1_3_ACTIVATION		22	0.0768007	0.429994	0.998016	0.998365	1	5314	tags=59%, list=51%, signal=121%

## Sheet: WT_Both_vs_KO_Both_REACTOME_neg
NAME	GS DETAILS	SIZE	ES	NES	NOM p-val	FDR q-val	FWER p-val	RANK AT MAX	LEADING EDGE
REACTOME_EUKARYOTIC_TRANSLATION_ELONGATION	Details ...	57	-0.669242	-6.08933	0	0	0	2007	tags=86%, list=19%, signal=106%
REACTOME_RESPONSE_OF_EIF2AK4_GCN2_TO_AMINO_ACID_DEFICIENCY	Details ...	64	-0.528169	-4.91255	0	0	0	1520	tags=67%, list=15%, signal=78%
REACTOME_EUKARYOTIC_TRANSLATION_INITIATION	Details ...	80	-0.474842	-4.90573	0	0	0	2366	tags=70%, list=23%, signal=90%
REACTOME_SELENOAMINO_ACID_METABOLISM	Details ...	75	-0.457797	-4.65563	0	0	0	2194	tags=67%, list=21%, signal=84%
REACTOME_TRANSLATION	Details ...	243	-0.250415	-4.512	0	0	0	4619	tags=69%, list=45%, signal=122%
REACTOME_SRP_DEPENDENT_COTRANSLATIONAL_PROTEIN_TARGETING_TO_MEMBRANE	Details ...	75	-0.449396	-4.5038	0	0	0	1729	tags=61%, list=17%, signal=73%
REACTOME_RRNA_PROCESSING	Details ...	148	-0.294172	-4.15457	0	0	0	5384	tags=81%, list=52%, signal=167%
REACTOME_REGULATION_OF_EXPRESSION_OF_SLITS_AND_ROBOS	Details ...	121	-0.318926	-4.11683	0	0	0	2637	tags=57%, list=26%, signal=76%
REACTOME_NONSENSE_MEDIATED_DECAY_NMD	Details ...	78	-0.409233	-4.1154	0	0	0	2296	tags=63%, list=22%, signal=80%
REACTOME_CELLULAR_RESPONSE_TO_STARVATION	Details ...	109	-0.329667	-4.0244	0	0	0	2224	tags=54%, list=22%, signal=68%
REACTOME_RESPIRATORY_ELECTRON_TRANSPORT	Details ...	97	-0.294604	-3.43287	0	0	0	4230	tags=70%, list=41%, signal=118%
REACTOME_ACTIVATION_OF_THE_MRNA_UPON_BINDING_OF_THE_CAP_BINDING_COMPLEX_AND_EIFS_AND_SUBSEQUENT_BINDING_TO_43S	Details ...	41	-0.44378	-3.35068	0	0	0	3247	tags=76%, list=31%, signal=110%
REACTOME_SIGNALING_BY_ROBO_RECEPTORS	Details ...	155	-0.230236	-3.31544	0	0	0	2658	tags=48%, list=26%, signal=64%
REACTOME_INFLUENZA_INFECTION	Details ...	110	-0.267793	-3.30668	0	0	0	1021	tags=36%, list=10%, signal=40%
REACTOME_RESPIRATORY_ELECTRON_TRANSPORT_ATP_SYNTHESIS_BY_CHEMIOSMOTIC_COUPLING_AND_HEAT_PRODUCTION_BY_UNCOUPLING_PROTEINS	Details ...	112	-0.263304	-3.28175	0	0	0	4230	tags=67%, list=41%, signal=112%
REACTOME_METABOLISM_OF_AMINO_ACIDS_AND_DERIVATIVES	Details ...	242	-0.183415	-3.24545	0	0	0	3360	tags=50%, list=33%, signal=73%
REACTOME_CELLULAR_RESPONSE_TO_CHEMICAL_STRESS	Details ...	137	-0.211952	-2.92156	0	0.000123263	0.002	5157	tags=71%, list=50%, signal=139%
REACTOME_MITOCHONDRIAL_TRANSLATION	Details ...	90	-0.262681	-2.90102	0	0.000116415	0.002	4774	tags=72%, list=46%, signal=133%
REACTOME_NEUTROPHIL_DEGRANULATION	Details ...	363	-0.13059	-2.79392	0	0.000377353	0.007	6329	tags=74%, list=61%, signal=184%
REACTOME_CYTOPROTECTION_BY_HMOX1	Details ...	110	-0.222729	-2.7035	0	0.000657812	0.013	5146	tags=72%, list=50%, signal=142%
REACTOME_ANTIGEN_PROCESSING_CROSS_PRESENTATION		86	-0.249801	-2.66863	0	0.00091852	0.019	5853	tags=81%, list=57%, signal=186%
REACTOME_THE_CITRIC_ACID_TCA_CYCLE_AND_RESPIRATORY_ELECTRON_TRANSPORT		154	-0.180122	-2.58022	0	0.00157169	0.034	4140	tags=58%, list=40%, signal=95%
REACTOME_INTERLEUKIN_1_SIGNALING		93	-0.226477	-2.55621	0	0.0017716	0.04	6794	tags=88%, list=66%, signal=255%
REACTOME_PROTEIN_LOCALIZATION		131	-0.193453	-2.55131	0	0.00178147	0.042	6153	tags=79%, list=60%, signal=192%
REACTOME_REGULATION_OF_RUNX3_EXPRESSION_AND_ACTIVITY		52	-0.301274	-2.53901	0	0.00207308	0.051	5648	tags=85%, list=55%, signal=186%
REACTOME_RRNA_MODIFICATION_IN_THE_NUCLEUS_AND_CYTOSOL		51	-0.304179	-2.53345	0	0.00207743	0.053	5384	tags=82%, list=52%, signal=171%
REACTOME_COMPLEX_I_BIOGENESIS		53	-0.290994	-2.50879	0	0.00248556	0.065	3444	tags=62%, list=33%, signal=93%
REACTOME_INTERFERON_ALPHA_BETA_SIGNALING		44	-0.313871	-2.48959	0	0.00300648	0.078	2878	tags=59%, list=28%, signal=82%
REACTOME_INTERFERON_GAMMA_SIGNALING		59	-0.271564	-2.4502	0	0.0042687	0.112	2991	tags=56%, list=29%, signal=78%
REACTOME_ASPARAGINE_N_LINKED_GLYCOSYLATION		240	-0.136206	-2.42862	0	0.00483841	0.129	6894	tags=80%, list=67%, signal=235%
REACTOME_ASYMMETRIC_LOCALIZATION_OF_PCP_PROTEINS		54	-0.279983	-2.4196	0	0.00487644	0.135	5735	tags=83%, list=55%, signal=186%
REACTOME_HEDGEHOG_ON_STATE		66	-0.243035	-2.36312	0	0.00723459	0.196	5648	tags=79%, list=55%, signal=173%
REACTOME_DEGRADATION_OF_GLI1_BY_THE_PROTEASOME		54	-0.269829	-2.36286	0	0.00701536	0.196	5648	tags=81%, list=55%, signal=179%
REACTOME_RUNX1_REGULATES_TRANSCRIPTION_OF_GENES_INVOLVED_IN_DIFFERENTIATION_OF_HSCS		63	-0.248771	-2.33425	0	0.00840853	0.234	5648	tags=79%, list=55%, signal=174%
REACTOME_RNA_POLYMERASE_III_CHAIN_ELONGATION		15	-0.507267	-2.32503	0	0.00874923	0.246	4412	tags=93%, list=43%, signal=163%
REACTOME_ABC_TRANSPORTER_DISORDERS		62	-0.245399	-2.3159	0.00202429	0.00903812	0.263	5648	tags=79%, list=55%, signal=173%
REACTOME_CROSS_PRESENTATION_OF_SOLUBLE_EXOGENOUS_ANTIGENS_ENDOSOMES		44	-0.295773	-2.31162	0.00385356	0.00903948	0.269	5648	tags=84%, list=55%, signal=185%
REACTOME_PCP_CE_PATHWAY		77	-0.223459	-2.30558	0.00193424	0.00890994	0.273	5762	tags=78%, list=56%, signal=175%
REACTOME_REGULATION_OF_HMOX1_EXPRESSION_AND_ACTIVITY		59	-0.255448	-2.30546	0	0.00868148	0.273	6660	tags=90%, list=64%, signal=251%
REACTOME_SIGNALING_BY_NOTCH4		73	-0.229925	-2.2663	0	0.0110131	0.34	5145	tags=73%, list=50%, signal=144%
REACTOME_DEGRADATION_OF_DVL		51	-0.267423	-2.25886	0	0.0113152	0.355	5762	tags=82%, list=56%, signal=185%
REACTOME_TCR_SIGNALING		97	-0.195942	-2.25566	0.0019084	0.0112652	0.361	3855	tags=57%, list=37%, signal=90%
REACTOME_MITOCHONDRIAL_PROTEIN_IMPORT		55	-0.26468	-2.23976	0.00401606	0.0121973	0.397	3669	tags=62%, list=36%, signal=95%
REACTOME_FCERI_MEDIATED_NF_KB_ACTIVATION		74	-0.217205	-2.21925	0.00190476	0.013282	0.437	5733	tags=77%, list=55%, signal=172%
REACTOME_ACTIVATED_NOTCH1_TRANSMITS_SIGNAL_TO_THE_NUCLEUS		26	-0.354254	-2.18872	0.00401606	0.0157134	0.5	4299	tags=77%, list=42%, signal=131%
REACTOME_STABILIZATION_OF_P53		51	-0.258803	-2.18754	0	0.0154805	0.503	5648	tags=80%, list=55%, signal=176%
REACTOME_PINK1_PRKN_MEDIATED_MITOPHAGY		18	-0.429905	-2.18394	0.00191939	0.0154502	0.509	3604	tags=78%, list=35%, signal=119%
REACTOME_REGULATION_OF_RUNX2_EXPRESSION_AND_ACTIVITY		62	-0.229173	-2.18352	0.0019802	0.0151707	0.509	5648	tags=77%, list=55%, signal=170%
REACTOME_DEGRADATION_OF_AXIN		51	-0.258803	-2.17234	0.0019685	0.0158754	0.538	5648	tags=80%, list=55%, signal=176%
REACTOME_NEDDYLATION		187	-0.137199	-2.16491	0	0.0163679	0.553	5904	tags=71%, list=57%, signal=162%
REACTOME_RNA_POLYMERASE_I_PROMOTER_ESCAPE		27	-0.337311	-2.14604	0.00406504	0.0179783	0.6	6859	tags=100%, list=66%, signal=297%
REACTOME_NEGATIVE_REGULATION_OF_NOTCH4_SIGNALING		50	-0.254837	-2.14023	0	0.0180407	0.612	5648	tags=80%, list=55%, signal=176%
REACTOME_METABOLISM_OF_POLYAMINES		53	-0.247325	-2.12249	0.00195695	0.0198992	0.66	5648	tags=79%, list=55%, signal=174%
REACTOME_SIGNALING_BY_THE_B_CELL_RECEPTOR_BCR		102	-0.178074	-2.10164	0.00192678	0.0228492	0.717	2637	tags=43%, list=26%, signal=57%
REACTOME_DEFECTIVE_CFTR_CAUSES_CYSTIC_FIBROSIS		56	-0.240622	-2.09719	0	0.0231308	0.725	5648	tags=79%, list=55%, signal=172%
REACTOME_FORMATION_OF_TC_NER_PRE_INCISION_COMPLEX		48	-0.250565	-2.09495	0.00596422	0.0230997	0.735	5390	tags=77%, list=52%, signal=160%
REACTOME_MITOCHONDRIAL_FATTY_ACID_BETA_OXIDATION		29	-0.325063	-2.08738	0.00199203	0.0237213	0.752	5204	tags=83%, list=50%, signal=166%
REACTOME_AUF1_HNRNP_D0_BINDS_AND_DESTABILIZES_MRNA		49	-0.253223	-2.07724	0	0.0246755	0.775	6044	tags=84%, list=58%, signal=201%
REACTOME_SIGNALING_BY_NOTCH		152	-0.142727	-2.04649	0.013834	0.0294518	0.835	4871	tags=61%, list=47%, signal=114%
REACTOME_DECTIN_1_MEDIATED_NONCANONICAL_NF_KB_SIGNALING		56	-0.232353	-2.04551	0.00595238	0.0291123	0.836	5733	tags=79%, list=55%, signal=175%
REACTOME_HEDGEHOG_LIGAND_BIOGENESIS		54	-0.232597	-2.01756	0.0037594	0.0335404	0.875	5648	tags=78%, list=55%, signal=171%
REACTOME_MRNA_CAPPING		26	-0.331409	-2.00779	0.00381679	0.0350883	0.888	6522	tags=96%, list=63%, signal=260%
REACTOME_CYTOSOLIC_SENSORS_OF_PATHOGEN_ASSOCIATED_DNA		55	-0.224195	-2.00367	0.0038835	0.0353905	0.893	4461	tags=65%, list=43%, signal=115%
REACTOME_C_TYPE_LECTIN_RECEPTORS_CLRS		116	-0.158906	-2.00245	0.00592885	0.0349942	0.894	7643	tags=90%, list=74%, signal=340%
REACTOME_CLEC7A_DECTIN_1_SIGNALING		92	-0.175232	-1.9852	0.00395257	0.0385797	0.911	5508	tags=71%, list=53%, signal=150%
REACTOME_TRNA_MODIFICATION_IN_THE_NUCLEUS_AND_CYTOSOL		38	-0.270564	-1.97636	0.00376648	0.0401428	0.922	7550	tags=100%, list=73%, signal=370%
REACTOME_INTERLEUKIN_1_FAMILY_SIGNALING		117	-0.156456	-1.97157	0.00770713	0.0405363	0.926	6794	tags=81%, list=66%, signal=234%
REACTOME_FORMATION_OF_THE_EARLY_ELONGATION_COMPLEX		30	-0.303251	-1.96953	0	0.0403687	0.927	6522	tags=93%, list=63%, signal=252%
REACTOME_SIGNALING_BY_NOTCH1		62	-0.212998	-1.96014	0.00431965	0.0420544	0.939	4814	tags=68%, list=47%, signal=126%
REACTOME_AMYLOID_FIBER_FORMATION		33	-0.28569	-1.95414	0.00835073	0.0427647	0.943	4261	tags=70%, list=41%, signal=118%
REACTOME_TP53_REGULATES_METABOLIC_GENES		81	-0.184553	-1.95002	0.00582524	0.0432752	0.947	4871	tags=65%, list=47%, signal=123%
REACTOME_INACTIVATION_OF_CSF3_G_CSF_SIGNALING		19	-0.374283	-1.94862	0.00581395	0.0429248	0.948	5387	tags=89%, list=52%, signal=187%
REACTOME_AMINO_ACIDS_REGULATE_MTORC1		45	-0.243894	-1.94506	0.0141129	0.0431404	0.952	6678	tags=89%, list=65%, signal=250%
REACTOME_REGULATION_OF_SIGNALING_BY_CBL		20	-0.361076	-1.94307	0.00787402	0.0429688	0.952	1444	tags=50%, list=14%, signal=58%
REACTOME_UCH_PROTEINASES		80	-0.178657	-1.91039	0.00395257	0.0503254	0.972	5145	tags=68%, list=50%, signal=133%
REACTOME_NEF_MEDIATES_DOWN_MODULATION_OF_CELL_SURFACE_RECEPTORS_BY_RECRUITING_THEM_TO_CLATHRIN_ADAPTERS		18	-0.368405	-1.90767	0.00982318	0.0505253	0.976	5961	tags=94%, list=58%, signal=223%
REACTOME_NERVOUS_SYSTEM_DEVELOPMENT		372	-0.0872576	-1.90668	0.0124224	0.05028	0.978	2660	tags=34%, list=26%, signal=44%
REACTOME_DOWNSTREAM_SIGNALING_EVENTS_OF_B_CELL_RECEPTOR_BCR		74	-0.188323	-1.90362	0.00806452	0.0504666	0.978	7007	tags=86%, list=68%, signal=267%
REACTOME_ABC_FAMILY_PROTEINS_MEDIATED_TRANSPORT		84	-0.177993	-1.90162	0.00829876	0.0503964	0.979	3713	tags=54%, list=36%, signal=83%
REACTOME_REGULATION_OF_PTEN_STABILITY_AND_ACTIVITY		61	-0.208936	-1.88562	0.00568182	0.0542037	0.985	5648	tags=75%, list=55%, signal=165%
REACTOME_RNA_POLYMERASE_I_TRANSCRIPTION_TERMINATION		26	-0.311233	-1.87809	0.00996016	0.0557618	0.991	4345	tags=73%, list=42%, signal=126%
REACTOME_LYSOSOME_VESICLE_BIOGENESIS		29	-0.286191	-1.87575	0.0169133	0.0557618	0.992	5961	tags=86%, list=58%, signal=203%
REACTOME_NUCLEAR_SIGNALING_BY_ERBB4		19	-0.344825	-1.8513	0.0126316	0.0634726	0.994	4603	tags=79%, list=45%, signal=142%
REACTOME_SPHINGOLIPID_METABOLISM		64	-0.194916	-1.82513	0.0102041	0.071682	0.997	3328	tags=52%, list=32%, signal=76%
REACTOME_PTEN_REGULATION		126	-0.138018	-1.82118	0.0182927	0.0723076	0.997	5564	tags=67%, list=54%, signal=144%
REACTOME_AUTOPHAGY		123	-0.139477	-1.81996	0.0141414	0.0719589	0.997	6643	tags=78%, list=64%, signal=216%
REACTOME_TRANSCRIPTIONAL_REGULATION_BY_RUNX3		83	-0.172365	-1.8164	0.0162933	0.0725473	0.997	5705	tags=72%, list=55%, signal=160%
REACTOME_SIGNALING_BY_CSF3_G_CSF		24	-0.312918	-1.81485	0.0122449	0.0722842	0.997	5387	tags=83%, list=52%, signal=174%
REACTOME_ENERGY_DEPENDENT_REGULATION_OF_MTOR_BY_LKB1_AMPK		27	-0.290141	-1.81224	0.0138067	0.072477	0.997	4283	tags=70%, list=41%, signal=120%
REACTOME_ANTIGEN_ACTIVATES_B_CELL_RECEPTOR_BCR_LEADING_TO_GENERATION_OF_SECOND_MESSENGERS		29	-0.284802	-1.80937	0.0114504	0.0726212	0.997	986	tags=38%, list=10%, signal=42%
REACTOME_DISEASES_OF_METABOLISM		142	-0.131208	-1.80645	0.023166	0.0730473	0.999	8198	tags=92%, list=79%, signal=440%
REACTOME_SIGNALING_BY_NOTCH2		27	-0.284515	-1.76173	0.00413223	0.0914684	1	4341	tags=70%, list=42%, signal=121%
REACTOME_METABOLISM_OF_WATER_SOLUBLE_VITAMINS_AND_COFACTORS		90	-0.157475	-1.75293	0.0242424	0.0947591	1	5737	tags=71%, list=56%, signal=158%
REACTOME_COPII_MEDIATED_VESICLE_TRANSPORT		56	-0.195041	-1.75141	0.0285714	0.0944184	1	4271	tags=61%, list=41%, signal=103%
REACTOME_DNA_DAMAGE_RECOGNITION_IN_GG_NER		36	-0.245169	-1.74473	0.0217391	0.096562	1	7811	tags=100%, list=76%, signal=408%
REACTOME_RNA_POLYMERASE_III_TRANSCRIPTION_INITIATION_FROM_TYPE_1_PROMOTER		25	-0.293909	-1.7346	0.0278884	0.100635	1	4412	tags=72%, list=43%, signal=125%
REACTOME_RNA_POLYMERASE_I_TRANSCRIPTION_INITIATION		43	-0.22107	-1.71594	0.0292398	0.109299	1	6859	tags=88%, list=66%, signal=262%
REACTOME_INSULIN_RECEPTOR_RECYCLING		17	-0.354526	-1.70507	0.0329897	0.114085	1	6678	tags=100%, list=65%, signal=282%
REACTOME_ROS_AND_RNS_PRODUCTION_IN_PHAGOCYTES		24	-0.290757	-1.70262	0.0355649	0.114488	1	3893	tags=67%, list=38%, signal=107%
REACTOME_SYNTHESIS_OF_SUBSTRATES_IN_N_GLYCAN_BIOSYTHESIS		48	-0.206978	-1.6999	0.0298211	0.114956	1	6269	tags=81%, list=61%, signal=206%
REACTOME_INTERLEUKIN_20_FAMILY_SIGNALING		16	-0.346582	-1.69599	0.0280561	0.116272	1	2884	tags=63%, list=28%, signal=87%
REACTOME_FC_EPSILON_RECEPTOR_FCERI_SIGNALING		123	-0.129202	-1.69016	0.0339321	0.11849	1	7000	tags=80%, list=68%, signal=246%
REACTOME_NUCLEOTIDE_BINDING_DOMAIN_LEUCINE_RICH_REPEAT_CONTAINING_RECEPTOR_NLR_SIGNALING_PATHWAYS		52	-0.198313	-1.68613	0.0298211	0.119674	1	4918	tags=67%, list=48%, signal=128%
REACTOME_CLASS_I_MHC_MEDIATED_ANTIGEN_PROCESSING_PRESENTATION		302	-0.0850122	-1.65871	0.0454545	0.134964	1	5924	tags=66%, list=57%, signal=149%
REACTOME_RNA_POLYMERASE_I_TRANSCRIPTION		46	-0.206916	-1.64379	0.0480769	0.14354	1	6859	tags=87%, list=66%, signal=257%
REACTOME_CLATHRIN_MEDIATED_ENDOCYTOSIS		104	-0.135984	-1.64207	0.0365112	0.143434	1	6361	tags=75%, list=62%, signal=193%
REACTOME_SIGNALING_BY_NOTCH1_PEST_DOMAIN_MUTANTS_IN_CANCER		50	-0.195245	-1.64172	0.0366599	0.142357	1	4814	tags=66%, list=47%, signal=123%
REACTOME_SCF_SKP2_MEDIATED_DEGRADATION_OF_P27_P21		56	-0.186759	-1.641	0.0316832	0.141462	1	5648	tags=73%, list=55%, signal=161%
REACTOME_THE_ROLE_OF_GTSE1_IN_G2_M_PROGRESSION_AFTER_G2_CHECKPOINT		66	-0.169106	-1.63677	0.0284553	0.142842	1	6094	tags=76%, list=59%, signal=183%
REACTOME_RAB_REGULATION_OF_TRAFFICKING		109	-0.133245	-1.63453	0.0390947	0.143039	1	3000	tags=42%, list=29%, signal=59%
REACTOME_MTOR_SIGNALLING		38	-0.224662	-1.63192	0.0447471	0.143372	1	4487	tags=66%, list=43%, signal=116%
REACTOME_POST_CHAPERONIN_TUBULIN_FOLDING_PATHWAY		16	-0.333559	-1.63119	0.0526316	0.142614	1	6894	tags=100%, list=67%, signal=300%
REACTOME_ASSOCIATION_OF_TRIC_CCT_WITH_TARGET_PROTEINS_DURING_BIOSYNTHESIS		35	-0.229903	-1.62837	0.0326296	0.143183	1	5901	tags=80%, list=57%, signal=186%
REACTOME_PROTEIN_FOLDING		75	-0.160877	-1.6244	0.0282258	0.144626	1	6894	tags=83%, list=67%, signal=246%
REACTOME_CELLULAR_RESPONSE_TO_HYPOXIA		65	-0.173612	-1.6241	0.0367505	0.143483	1	6168	tags=77%, list=60%, signal=190%
REACTOME_NOTCH3_ACTIVATION_AND_TRANSMISSION_OF_SIGNAL_TO_THE_NUCLEUS		20	-0.297576	-1.61679	0.0335968	0.147173	1	4166	tags=70%, list=40%, signal=117%
REACTOME_GLUCONEOGENESIS		24	-0.270039	-1.60982	0.0470588	0.150776	1	3676	tags=63%, list=36%, signal=97%
REACTOME_ACTIVATION_OF_IRF3_IRF7_MEDIATED_BY_TBK1_IKK_EPSILON		15	-0.337016	-1.59532	0.048218	0.160097	1	5480	tags=87%, list=53%, signal=184%
REACTOME_RNA_POLYMERASE_III_TRANSCRIPTION_TERMINATION		19	-0.310611	-1.59336	0.0484848	0.160243	1	4412	tags=74%, list=43%, signal=128%
REACTOME_ANTIGEN_PROCESSING_UBIQUITINATION_PROTEASOME_DEGRADATION		251	-0.0886122	-1.59061	0.0503876	0.160887	1	8166	tags=88%, list=79%, signal=407%
REACTOME_TRNA_PROCESSING		93	-0.141618	-1.58795	0.0323887	0.161588	1	7552	tags=87%, list=73%, signal=321%
REACTOME_TNF_SIGNALING		41	-0.207116	-1.58775	0.0567766	0.160395	1	4927	tags=68%, list=48%, signal=130%
REACTOME_METABOLISM_OF_VITAMINS_AND_COFACTORS		126	-0.121557	-1.58499	0.063745	0.161043	1	5568	tags=66%, list=54%, signal=141%
REACTOME_BRANCHED_CHAIN_AMINO_ACID_CATABOLISM		21	-0.291213	-1.5809	0.0357143	0.162768	1	5856	tags=86%, list=57%, signal=197%
REACTOME_EPH_EPHRIN_MEDIATED_REPULSION_OF_CELLS		34	-0.225349	-1.5744	0.0532787	0.166689	1	4671	tags=68%, list=45%, signal=123%
REACTOME_SIGNALING_BY_INTERLEUKINS		340	-0.0728011	-1.55423	0.0610998	0.181602	1	7055	tags=75%, list=68%, signal=229%
REACTOME_COPI_MEDIATED_ANTEROGRADE_TRANSPORT		78	-0.149654	-1.55377	0.0588235	0.180473	1	6946	tags=82%, list=67%, signal=248%
REACTOME_MRNA_DECAY_BY_3_TO_5_EXORIBONUCLEASE		15	-0.323547	-1.55093	0.0501044	0.181802	1	4241	tags=73%, list=41%, signal=124%
REACTOME_REGULATION_OF_RAS_BY_GAPS		62	-0.163115	-1.54354	0.0484848	0.186626	1	6660	tags=81%, list=64%, signal=225%
REACTOME_REGULATED_NECROSIS		45	-0.196372	-1.54309	0.0496894	0.185564	1	4411	tags=62%, list=43%, signal=108%
REACTOME_FCERI_MEDIATED_CA_2_MOBILIZATION		30	-0.236875	-1.54255	0.0658683	0.184605	1	3072	tags=53%, list=30%, signal=76%
REACTOME_HIV_TRANSCRIPTION_ELONGATION		36	-0.218913	-1.54138	0.0507099	0.184215	1	6646	tags=86%, list=64%, signal=240%
REACTOME_MTORC1_MEDIATED_SIGNALLING		23	-0.274817	-1.53961	0.0462777	0.184187	1	4806	tags=74%, list=47%, signal=138%
REACTOME_TICAM1_RIP1_MEDIATED_IKK_COMPLEX_RECRUITMENT		16	-0.321089	-1.53837	0.0532544	0.18399	1	3793	tags=69%, list=37%, signal=108%
REACTOME_NOTCH2_ACTIVATION_AND_TRANSMISSION_OF_SIGNAL_TO_THE_NUCLEUS		18	-0.302817	-1.53659	0.0519751	0.184264	1	4341	tags=72%, list=42%, signal=124%
REACTOME_UB_SPECIFIC_PROCESSING_PROTEASES		147	-0.105374	-1.53408	0.0558882	0.184811	1	5255	tags=61%, list=51%, signal=123%
REACTOME_BIOSYNTHESIS_OF_THE_N_GLYCAN_PRECURSOR_DOLICHOL_LIPID_LINKED_OLIGOSACCHARIDE_LLO_AND_TRANSFER_TO_A_NASCENT_PROTEIN		60	-0.166253	-1.53242	0.046748	0.185041	1	6733	tags=82%, list=65%, signal=233%
REACTOME_GLYCOSPHINGOLIPID_METABOLISM		32	-0.225808	-1.53106	0.0499002	0.184911	1	2842	tags=50%, list=27%, signal=69%
REACTOME_RNA_POLYMERASE_III_TRANSCRIPTION_INITIATION_FROM_TYPE_3_PROMOTER		25	-0.252745	-1.5224	0.0709939	0.191091	1	4423	tags=68%, list=43%, signal=119%
REACTOME_O_LINKED_GLYCOSYLATION_OF_MUCINS		29	-0.237515	-1.52126	0.0625	0.190635	1	3968	tags=62%, list=38%, signal=100%
REACTOME_INFECTION_WITH_MYCOBACTERIUM_TUBERCULOSIS		24	-0.260098	-1.52066	0.074	0.189973	1	5501	tags=79%, list=53%, signal=169%
REACTOME_ER_TO_GOLGI_ANTEROGRADE_TRANSPORT		121	-0.118483	-1.51639	0.0686869	0.192296	1	6478	tags=74%, list=63%, signal=197%
REACTOME_TRANSPORT_TO_THE_GOLGI_AND_SUBSEQUENT_MODIFICATION		143	-0.106875	-1.51339	0.0719844	0.193755	1	6139	tags=70%, list=59%, signal=170%
REACTOME_TAK1_ACTIVATES_NFKB_BY_PHOSPHORYLATION_AND_ACTIVATION_OF_IKKS_COMPLEX		27	-0.241786	-1.50868	0.0683112	0.196801	1	5547	tags=78%, list=54%, signal=167%
REACTOME_GAMMA_CARBOXYLATION_HYPUSINE_FORMATION_AND_ARYLSULFATASE_ACTIVATION		29	-0.231693	-1.50841	0.0738523	0.195674	1	4028	tags=62%, list=39%, signal=101%
REACTOME_HEDGEHOG_OFF_STATE		92	-0.136052	-1.5059	0.06917	0.196453	1	6134	tags=73%, list=59%, signal=178%
REACTOME_ABORTIVE_ELONGATION_OF_HIV_1_TRANSCRIPT_IN_THE_ABSENCE_OF_TAT		21	-0.274357	-1.50198	0.0840164	0.198387	1	6522	tags=90%, list=63%, signal=245%
REACTOME_SIGNALING_BY_HEDGEHOG		114	-0.120781	-1.49669	0.0758755	0.201739	1	7379	tags=83%, list=71%, signal=288%
REACTOME_TRNA_AMINOACYLATION		40	-0.203995	-1.49639	0.0670391	0.200744	1	6944	tags=88%, list=67%, signal=266%
REACTOME_RAB_GEFS_EXCHANGE_GTP_FOR_GDP_ON_RABS		81	-0.143041	-1.49611	0.0828402	0.199636	1	3000	tags=43%, list=29%, signal=60%
REACTOME_SYNTHESIS_OF_PIPS_AT_THE_GOLGI_MEMBRANE		15	-0.313953	-1.49376	0.0616016	0.200329	1	2273	tags=53%, list=22%, signal=68%
REACTOME_CITRIC_ACID_CYCLE_TCA_CYCLE		21	-0.273346	-1.48864	0.0750988	0.20364	1	5056	tags=76%, list=49%, signal=149%
REACTOME_FATTY_ACID_METABOLISM		114	-0.118904	-1.4856	0.0598802	0.205065	1	5857	tags=68%, list=57%, signal=156%
REACTOME_FOXO_MEDIATED_TRANSCRIPTION_OF_OXIDATIVE_STRESS_METABOLIC_AND_NEURONAL_GENES		19	-0.282785	-1.48379	0.0856574	0.205298	1	5243	tags=79%, list=51%, signal=160%
REACTOME_COOPERATION_OF_PREFOLDIN_AND_TRIC_CCT_IN_ACTIN_AND_TUBULIN_FOLDING		25	-0.253657	-1.48168	0.0745968	0.205776	1	6894	tags=92%, list=67%, signal=276%
REACTOME_LDL_CLEARANCE		16	-0.310211	-1.48088	0.0680412	0.205273	1	6489	tags=94%, list=63%, signal=252%
REACTOME_GLYCOSAMINOGLYCAN_METABOLISM		80	-0.14023	-1.47854	0.1	0.206069	1	6185	tags=74%, list=60%, signal=182%
REACTOME_G1_S_DNA_DAMAGE_CHECKPOINTS		61	-0.159464	-1.47742	0.0645793	0.205655	1	5648	tags=70%, list=55%, signal=155%
REACTOME_DETOXIFICATION_OF_REACTIVE_OXYGEN_SPECIES		28	-0.232172	-1.47545	0.0841683	0.206149	1	7943	tags=100%, list=77%, signal=431%
REACTOME_RESPONSE_OF_MTB_TO_PHAGOCYTOSIS		20	-0.268347	-1.47533	0.060241	0.204949	1	5501	tags=80%, list=53%, signal=171%
REACTOME_METABOLISM_OF_LIPIDS		496	-0.0579932	-1.47083	0.0652591	0.207366	1	8286	tags=86%, list=80%, signal=411%
REACTOME_MEMBRANE_TRAFFICKING		497	-0.0572079	-1.46487	0.0809717	0.211645	1	6550	tags=69%, list=63%, signal=179%
REACTOME_SEALING_OF_THE_NUCLEAR_ENVELOPE_NE_BY_ESCRT_III		21	-0.273983	-1.46435	0.0992509	0.2108	1	7018	tags=95%, list=68%, signal=296%
REACTOME_CARBOXYTERMINAL_POST_TRANSLATIONAL_MODIFICATIONS_OF_TUBULIN		24	-0.250291	-1.46372	0.0803922	0.21005	1	6894	tags=92%, list=67%, signal=275%
REACTOME_INSERTION_OF_TAIL_ANCHORED_PROTEINS_INTO_THE_ENDOPLASMIC_RETICULUM_MEMBRANE		17	-0.293969	-1.45678	0.0938776	0.215056	1	5479	tags=82%, list=53%, signal=175%
REACTOME_KERATAN_SULFATE_KERATIN_METABOLISM		21	-0.272293	-1.45577	0.096	0.214715	1	5559	tags=81%, list=54%, signal=175%
REACTOME_TRANS_GOLGI_NETWORK_VESICLE_BUDDING		65	-0.157546	-1.4517	0.0778443	0.217072	1	6492	tags=78%, list=63%, signal=210%
REACTOME_INTRACELLULAR_SIGNALING_BY_SECOND_MESSENGERS		239	-0.079483	-1.45134	0.0785124	0.216119	1	5339	tags=59%, list=52%, signal=120%
REACTOME_A_TETRASACCHARIDE_LINKER_SEQUENCE_IS_REQUIRED_FOR_GAG_SYNTHESIS		15	-0.306492	-1.45062	0.0854871	0.21563	1	972	tags=40%, list=9%, signal=44%
REACTOME_NOD1_2_SIGNALING_PATHWAY		32	-0.212396	-1.45055	0.07431	0.214469	1	4918	tags=69%, list=48%, signal=131%
REACTOME_HEPARAN_SULFATE_HEPARIN_HS_GAG_METABOLISM		34	-0.207764	-1.44267	0.08	0.220946	1	6372	tags=82%, list=62%, signal=214%
REACTOME_CYTOSOLIC_TRNA_AMINOACYLATION		22	-0.253846	-1.44075	0.0928854	0.221377	1	5839	tags=82%, list=56%, signal=188%
REACTOME_LATE_ENDOSOMAL_MICROAUTOPHAGY		25	-0.22774	-1.43884	0.0884086	0.221869	1	7988	tags=100%, list=77%, signal=439%
REACTOME_TOLL_LIKE_RECEPTOR_CASCADES		128	-0.110395	-1.43569	0.105263	0.223252	1	6141	tags=70%, list=59%, signal=171%
REACTOME_METABOLISM_OF_CARBOHYDRATES		210	-0.085418	-1.43512	0.0949367	0.222513	1	6912	tags=75%, list=67%, signal=223%
REACTOME_MAPK6_MAPK4_SIGNALING		76	-0.138836	-1.42799	0.086444	0.227985	1	5648	tags=68%, list=55%, signal=150%
REACTOME_FORMATION_OF_TUBULIN_FOLDING_INTERMEDIATES_BY_CCT_TRIC		18	-0.277972	-1.41985	0.101504	0.234438	1	6894	tags=94%, list=67%, signal=283%
REACTOME_TRANSCRIPTIONAL_REGULATION_BY_RUNX2		92	-0.128663	-1.41909	0.0791506	0.233824	1	5648	tags=67%, list=55%, signal=147%
REACTOME_REGULATION_OF_TNFR1_SIGNALING		32	-0.211522	-1.41437	0.0981964	0.236986	1	4927	tags=69%, list=48%, signal=131%
REACTOME_INTERLEUKIN_2_FAMILY_SIGNALING		35	-0.195035	-1.41123	0.116183	0.238716	1	3012	tags=49%, list=29%, signal=68%
REACTOME_ER_QUALITY_CONTROL_COMPARTMENT_ERQC		19	-0.266122	-1.41084	0.0988372	0.237771	1	4327	tags=68%, list=42%, signal=117%
REACTOME_DEGRADATION_OF_BETA_CATENIN_BY_THE_DESTRUCTION_COMPLEX		77	-0.136029	-1.40449	0.102784	0.242311	1	3706	tags=49%, list=36%, signal=76%
REACTOME_IKK_COMPLEX_RECRUITMENT_MEDIATED_BY_RIP1		19	-0.268826	-1.40155	0.117172	0.243965	1	5387	tags=79%, list=52%, signal=165%
REACTOME_SIGNALING_BY_NOTCH3		37	-0.192283	-1.39052	0.117764	0.253822	1	4166	tags=59%, list=40%, signal=99%
REACTOME_MITOPHAGY		24	-0.235258	-1.38898	0.121032	0.254099	1	3604	tags=58%, list=35%, signal=89%
REACTOME_HS_GAG_DEGRADATION		16	-0.281483	-1.38467	0.114173	0.256991	1	972	tags=38%, list=9%, signal=41%
REACTOME_BUDDING_AND_MATURATION_OF_HIV_VIRION		21	-0.254979	-1.38371	0.113636	0.25663	1	3769	tags=62%, list=36%, signal=97%
REACTOME_REGULATION_OF_MRNA_STABILITY_BY_PROTEINS_THAT_BIND_AU_RICH_ELEMENTS		77	-0.131746	-1.37531	0.118834	0.26429	1	8045	tags=91%, list=78%, signal=407%
REACTOME_NUCLEAR_RECEPTOR_TRANSCRIPTION_PATHWAY		29	-0.215756	-1.37355	0.128655	0.264678	1	4905	tags=69%, list=47%, signal=131%
REACTOME_MITOCHONDRIAL_BIOGENESIS		79	-0.13423	-1.37021	0.12249	0.266821	1	6997	tags=81%, list=68%, signal=249%
REACTOME_GROWTH_HORMONE_RECEPTOR_SIGNALING		18	-0.265323	-1.36766	0.126252	0.268016	1	5302	tags=78%, list=51%, signal=159%
REACTOME_INTERLEUKIN_3_INTERLEUKIN_5_AND_GM_CSF_SIGNALING		41	-0.185194	-1.36406	0.114504	0.270631	1	2884	tags=46%, list=28%, signal=64%
REACTOME_THE_ROLE_OF_NEF_IN_HIV_1_REPLICATION_AND_DISEASE_PATHOGENESIS		25	-0.22386	-1.36391	0.130261	0.269354	1	5961	tags=80%, list=58%, signal=189%
REACTOME_FORMATION_OF_INCISION_COMPLEX_IN_GG_NER		38	-0.18705	-1.3638	0.112	0.268095	1	7866	tags=95%, list=76%, signal=395%
REACTOME_CHONDROITIN_SULFATE_DERMATAN_SULFATE_METABOLISM		34	-0.196409	-1.35936	0.137476	0.27129	1	6185	tags=79%, list=60%, signal=197%
REACTOME_DEFECTS_IN_VITAMIN_AND_COFACTOR_METABOLISM		19	-0.25826	-1.34356	0.133205	0.287103	1	5496	tags=79%, list=53%, signal=168%
REACTOME_DISEASES_OF_GLYCOSYLATION		79	-0.133896	-1.34198	0.145923	0.287531	1	8047	tags=91%, list=78%, signal=409%
REACTOME_THE_NLRP3_INFLAMMASOME		16	-0.280084	-1.33842	0.13843	0.289981	1	5508	tags=81%, list=53%, signal=174%
REACTOME_DISEASES_OF_CARBOHYDRATE_METABOLISM		27	-0.22523	-1.33696	0.135081	0.290101	1	6866	tags=89%, list=66%, signal=264%
REACTOME_CASPASE_ACTIVATION_VIA_EXTRINSIC_APOPTOTIC_SIGNALLING_PATHWAY		21	-0.244453	-1.33429	0.136095	0.291552	1	1909	tags=43%, list=18%, signal=52%
REACTOME_CARGO_TRAFFICKING_TO_THE_PERICILIARY_MEMBRANE		40	-0.177125	-1.33113	0.132265	0.293585	1	7479	tags=90%, list=72%, signal=324%
REACTOME_SARS_COV_1_INFECTION		41	-0.175501	-1.32285	0.143137	0.301911	1	3740	tags=54%, list=36%, signal=84%
REACTOME_N_GLYCAN_TRIMMING_IN_THE_ER_AND_CALNEXIN_CALRETICULIN_CYCLE		33	-0.190475	-1.31705	0.157258	0.30744	1	7121	tags=88%, list=69%, signal=282%
REACTOME_PURINERGIC_SIGNALING_IN_LEISHMANIASIS_INFECTION		26	-0.21714	-1.31361	0.145098	0.310259	1	6905	tags=88%, list=67%, signal=266%
REACTOME_ACTIVATED_TAK1_MEDIATES_P38_MAPK_ACTIVATION		21	-0.239009	-1.31219	0.149701	0.310451	1	4918	tags=71%, list=48%, signal=136%
REACTOME_TNFR1_INDUCED_NFKAPPAB_SIGNALING_PATHWAY		28	-0.205076	-1.3077	0.155689	0.314419	1	3793	tags=57%, list=37%, signal=90%
REACTOME_IMMUNOREGULATORY_INTERACTIONS_BETWEEN_A_LYMPHOID_AND_A_NON_LYMPHOID_CELL		46	-0.162613	-1.30515	0.119497	0.315837	1	2372	tags=39%, list=23%, signal=51%
REACTOME_NEGATIVE_EPIGENETIC_REGULATION_OF_RRNA_EXPRESSION		46	-0.163243	-1.30056	0.146771	0.320096	1	6859	tags=83%, list=66%, signal=245%
REACTOME_RIPK1_MEDIATED_REGULATED_NECROSIS		25	-0.213812	-1.29302	0.162	0.327877	1	4411	tags=64%, list=43%, signal=111%
REACTOME_DISEASES_OF_IMMUNE_SYSTEM		25	-0.215713	-1.29215	0.166994	0.327565	1	1911	tags=40%, list=18%, signal=49%
REACTOME_TOLL_LIKE_RECEPTOR_TLR1_TLR2_CASCADE		88	-0.11789	-1.28881	0.165692	0.330037	1	7014	tags=80%, list=68%, signal=245%
REACTOME_HIV_INFECTION		197	-0.0788645	-1.28471	0.169661	0.333719	1	8120	tags=86%, list=79%, signal=395%
REACTOME_INTRA_GOLGI_TRAFFIC		40	-0.175182	-1.28335	0.170588	0.333959	1	7499	tags=90%, list=73%, signal=327%
REACTOME_HS_GAG_BIOSYNTHESIS		17	-0.259415	-1.2812	0.170732	0.334993	1	972	tags=35%, list=9%, signal=39%
REACTOME_PHASE_II_CONJUGATION_OF_COMPOUNDS		46	-0.158379	-1.27744	0.189135	0.338218	1	5561	tags=70%, list=54%, signal=150%
REACTOME_TOLL_LIKE_RECEPTOR_9_TLR9_CASCADE		84	-0.121173	-1.27413	0.169261	0.341066	1	6141	tags=71%, list=59%, signal=175%
REACTOME_SARS_COV_2_INFECTION		56	-0.144183	-1.274	0.171154	0.339685	1	3871	tags=52%, list=37%, signal=82%
REACTOME_TNFR2_NON_CANONICAL_NF_KB_PATHWAY		84	-0.118041	-1.27368	0.175337	0.338472	1	5804	tags=68%, list=56%, signal=154%
REACTOME_RNA_POLYMERASE_III_TRANSCRIPTION		37	-0.174894	-1.2667	0.183333	0.345873	1	6859	tags=84%, list=66%, signal=248%
REACTOME_GAP_JUNCTION_TRAFFICKING_AND_REGULATION		20	-0.233495	-1.2659	0.173469	0.345468	1	6894	tags=90%, list=67%, signal=270%
REACTOME_INTERLEUKIN_12_FAMILY_SIGNALING		43	-0.164585	-1.2633	0.190377	0.3471	1	7200	tags=86%, list=70%, signal=282%
REACTOME_MATURATION_OF_SARS_COV_2_SPIKE_PROTEIN		26	-0.205355	-1.25683	0.185185	0.35409	1	6629	tags=85%, list=64%, signal=235%
REACTOME_NUCLEOTIDE_EXCISION_REPAIR		99	-0.108722	-1.25348	0.193416	0.356968	1	7866	tags=87%, list=76%, signal=360%
REACTOME_B_WICH_COMPLEX_POSITIVELY_REGULATES_RRNA_EXPRESSION		29	-0.195183	-1.25252	0.216867	0.356691	1	2266	tags=41%, list=22%, signal=53%
REACTOME_CRISTAE_FORMATION		23	-0.220195	-1.25195	0.180556	0.355853	1	7616	tags=96%, list=74%, signal=363%
REACTOME_GLUTATHIONE_CONJUGATION		21	-0.232735	-1.25066	0.212679	0.355938	1	5967	tags=81%, list=58%, signal=191%
REACTOME_SIGNALING_BY_ERBB4		36	-0.176384	-1.24949	0.189516	0.356034	1	3639	tags=53%, list=35%, signal=81%
REACTOME_MITOCHONDRIAL_CALCIUM_ION_TRANSPORT		20	-0.230974	-1.24793	0.213873	0.35659	1	4853	tags=70%, list=47%, signal=132%
REACTOME_BIOLOGICAL_OXIDATIONS		84	-0.115693	-1.24729	0.200413	0.355765	1	5582	tags=65%, list=54%, signal=141%
REACTOME_INFLAMMASOMES		21	-0.229522	-1.23751	0.19917	0.366617	1	5508	tags=76%, list=53%, signal=163%
REACTOME_O_LINKED_GLYCOSYLATION		48	-0.149837	-1.23577	0.206204	0.367235	1	1474	tags=29%, list=14%, signal=34%
REACTOME_CALNEXIN_CALRETICULIN_CYCLE		24	-0.211194	-1.2352	0.192698	0.366258	1	5144	tags=71%, list=50%, signal=141%
REACTOME_NUCLEOBASE_CATABOLISM		24	-0.208515	-1.23372	0.183099	0.366596	1	4741	tags=67%, list=46%, signal=123%
REACTOME_DISEASES_ASSOCIATED_WITH_GLYCOSYLATION_PRECURSOR_BIOSYNTHESIS		17	-0.255385	-1.2319	0.219282	0.367466	1	7093	tags=94%, list=69%, signal=300%
REACTOME_DISEASES_ASSOCIATED_WITH_GLYCOSAMINOGLYCAN_METABOLISM		23	-0.210865	-1.23188	0.207156	0.365932	1	972	tags=30%, list=9%, signal=34%
REACTOME_CD28_CO_STIMULATION		30	-0.186754	-1.23121	0.202041	0.365129	1	1177	tags=30%, list=11%, signal=34%
REACTOME_NOTCH1_INTRACELLULAR_DOMAIN_REGULATES_TRANSCRIPTION		40	-0.15992	-1.2299	0.222011	0.365416	1	4814	tags=63%, list=47%, signal=117%
REACTOME_DDX58_IFIH1_MEDIATED_INDUCTION_OF_INTERFERON_ALPHA_BETA		58	-0.136352	-1.22753	0.1893	0.367022	1	7331	tags=84%, list=71%, signal=289%
REACTOME_ENDOSOMAL_SORTING_COMPLEX_REQUIRED_FOR_TRANSPORT_ESCRT		25	-0.203065	-1.22464	0.206287	0.369288	1	7829	tags=96%, list=76%, signal=395%
REACTOME_PLASMA_LIPOPROTEIN_CLEARANCE		25	-0.205218	-1.2244	0.21748	0.368103	1	4913	tags=68%, list=48%, signal=129%
REACTOME_TRANSCRIPTION_COUPLED_NUCLEOTIDE_EXCISION_REPAIR_TC_NER		70	-0.122058	-1.22327	0.208661	0.367879	1	5392	tags=64%, list=52%, signal=134%
REACTOME_BETA_CATENIN_INDEPENDENT_WNT_SIGNALING		116	-0.0988557	-1.22117	0.212302	0.369081	1	5762	tags=66%, list=56%, signal=146%
REACTOME_POSITIVE_EPIGENETIC_REGULATION_OF_RRNA_EXPRESSION		43	-0.153574	-1.21883	0.230019	0.370755	1	2266	tags=37%, list=22%, signal=47%
REACTOME_MRNA_SPLICING_MINOR_PATHWAY		44	-0.153512	-1.20678	0.213084	0.385207	1	7112	tags=84%, list=69%, signal=269%
REACTOME_SIGNALLING_TO_ERKS		28	-0.186465	-1.20579	0.218254	0.38493	1	8045	tags=96%, list=78%, signal=434%
REACTOME_INTERLEUKIN_7_SIGNALING		20	-0.221474	-1.19764	0.25	0.394573	1	2884	tags=50%, list=28%, signal=69%
REACTOME_INTERLEUKIN_12_SIGNALING		37	-0.168904	-1.19561	0.258687	0.395963	1	7200	tags=86%, list=70%, signal=284%
REACTOME_SPHINGOLIPID_DE_NOVO_BIOSYNTHESIS		32	-0.179802	-1.19554	0.237525	0.39444	1	3316	tags=50%, list=32%, signal=73%
REACTOME_HOST_INTERACTIONS_OF_HIV_FACTORS		111	-0.098121	-1.19307	0.242718	0.39644	1	6912	tags=77%, list=67%, signal=229%
REACTOME_DAP12_SIGNALING		27	-0.190639	-1.19011	0.243129	0.398922	1	3012	tags=48%, list=29%, signal=68%
REACTOME_ZBP1_DAI_MEDIATED_INDUCTION_OF_TYPE_I_IFNS		20	-0.21888	-1.18805	0.24498	0.4	1	4461	tags=65%, list=43%, signal=114%
REACTOME_SIALIC_ACID_METABOLISM		22	-0.212151	-1.1836	0.256729	0.404323	1	6269	tags=82%, list=61%, signal=208%
REACTOME_MYD88_INDEPENDENT_TLR4_CASCADE		87	-0.107961	-1.18348	0.224172	0.402905	1	6141	tags=70%, list=59%, signal=171%
REACTOME_SELECTIVE_AUTOPHAGY		62	-0.128971	-1.18228	0.231827	0.402972	1	8511	tags=95%, list=82%, signal=536%
REACTOME_ROLE_OF_LAT2_NTAL_LAB_ON_CALCIUM_MOBILIZATION		15	-0.252713	-1.16926	0.251451	0.420274	1	1527	tags=40%, list=15%, signal=47%
REACTOME_PEROXISOMAL_PROTEIN_IMPORT		47	-0.143991	-1.16719	0.282209	0.421433	1	5996	tags=72%, list=58%, signal=172%
REACTOME_OVARIAN_TUMOR_DOMAIN_PROTEASES		35	-0.166533	-1.16363	0.261122	0.424926	1	6849	tags=83%, list=66%, signal=245%
REACTOME_TRANSFERRIN_ENDOCYTOSIS_AND_RECYCLING		21	-0.211516	-1.16238	0.243564	0.425059	1	6678	tags=86%, list=65%, signal=242%
REACTOME_DOWNREGULATION_OF_SMAD2_3_SMAD4_TRANSCRIPTIONAL_ACTIVITY		21	-0.208773	-1.15333	0.274704	0.436106	1	5722	tags=76%, list=55%, signal=170%
REACTOME_SIGNALING_BY_INSULIN_RECEPTOR		47	-0.142415	-1.1418	0.292683	0.451439	1	6452	tags=77%, list=62%, signal=203%
REACTOME_PROGRAMMED_CELL_DEATH		172	-0.0749676	-1.13845	0.27833	0.454874	1	5368	tags=59%, list=52%, signal=121%
REACTOME_SIGNALING_BY_FGFR2_IIIA_TM		15	-0.236047	-1.12948	0.300191	0.466397	1	6522	tags=87%, list=63%, signal=235%
REACTOME_PLASMA_LIPOPROTEIN_ASSEMBLY_REMODELING_AND_CLEARANCE		44	-0.1437	-1.12358	0.291405	0.473748	1	5099	tags=64%, list=49%, signal=125%
REACTOME_INTEGRIN_SIGNALING		23	-0.192085	-1.12315	0.308594	0.472666	1	1615	tags=35%, list=16%, signal=41%
REACTOME_IRE1ALPHA_ACTIVATES_CHAPERONES		45	-0.141432	-1.1185	0.302041	0.478121	1	5206	tags=64%, list=50%, signal=129%
REACTOME_APC_C_CDH1_MEDIATED_DEGRADATION_OF_CDC20_AND_OTHER_APC_C_CDH1_TARGETED_PROTEINS_IN_LATE_MITOSIS_EARLY_G1		68	-0.116133	-1.11841	0.308765	0.476424	1	5648	tags=66%, list=55%, signal=145%
REACTOME_INTERFERON_SIGNALING		138	-0.0820936	-1.11789	0.302281	0.475482	1	2534	tags=33%, list=25%, signal=43%
REACTOME_TRANSLATION_OF_SARS_COV_1_STRUCTURAL_PROTEINS		26	-0.18673	-1.11403	0.307531	0.47969	1	3641	tags=54%, list=35%, signal=83%
REACTOME_FGFR2_MUTANT_RECEPTOR_ACTIVATION		15	-0.236047	-1.11252	0.309168	0.480368	1	6522	tags=87%, list=63%, signal=235%
REACTOME_PYROPTOSIS		20	-0.205526	-1.10992	0.323171	0.482481	1	4082	tags=60%, list=39%, signal=99%
REACTOME_MICRORNA_MIRNA_BIOGENESIS		20	-0.205259	-1.10109	0.297131	0.494894	1	5635	tags=75%, list=55%, signal=165%
REACTOME_BBSOME_MEDIATED_CARGO_TARGETING_TO_CILIUM		19	-0.209113	-1.0895	0.351464	0.511671	1	6003	tags=79%, list=58%, signal=188%
REACTOME_MITOCHONDRIAL_TRNA_AMINOACYLATION		21	-0.195712	-1.08803	0.327273	0.512264	1	6841	tags=86%, list=66%, signal=253%
REACTOME_GENE_AND_PROTEIN_EXPRESSION_BY_JAK_STAT_SIGNALING_AFTER_INTERLEUKIN_12_STIMULATION		29	-0.16597	-1.07494	0.361582	0.532064	1	7200	tags=86%, list=70%, signal=283%
REACTOME_ACTIVATION_OF_AMPK_DOWNSTREAM_OF_NMDARS		17	-0.215266	-1.06807	0.367424	0.541373	1	6899	tags=88%, list=67%, signal=265%
REACTOME_INTERLEUKIN_17_SIGNALING		62	-0.113464	-1.06186	0.34252	0.549977	1	8837	tags=97%, list=86%, signal=664%
REACTOME_GOLGI_ASSOCIATED_VESICLE_BIOGENESIS		52	-0.122557	-1.06076	0.352362	0.549857	1	6492	tags=75%, list=63%, signal=201%
REACTOME_DEUBIQUITINATION		216	-0.0610375	-1.05746	0.384778	0.553502	1	7326	tags=77%, list=71%, signal=258%
REACTOME_CARGO_RECOGNITION_FOR_CLATHRIN_MEDIATED_ENDOCYTOSIS		69	-0.112109	-1.05621	0.358824	0.553674	1	6489	tags=74%, list=63%, signal=197%
REACTOME_TRANSCRIPTIONAL_ACTIVATION_OF_MITOCHONDRIAL_BIOGENESIS		50	-0.123675	-1.05384	0.355372	0.555714	1	6997	tags=80%, list=68%, signal=246%
REACTOME_MISCELLANEOUS_TRANSPORT_AND_BINDING_EVENTS		15	-0.223062	-1.04484	0.376016	0.569342	1	6656	tags=87%, list=64%, signal=243%
REACTOME_NR1H3_NR1H2_REGULATE_GENE_EXPRESSION_LINKED_TO_CHOLESTEROL_TRANSPORT_AND_EFFLUX		29	-0.165602	-1.04331	0.392276	0.569926	1	3640	tags=52%, list=35%, signal=80%
REACTOME_POST_TRANSLATIONAL_MODIFICATION_SYNTHESIS_OF_GPI_ANCHORED_PROTEINS		38	-0.144352	-1.04261	0.407332	0.56913	1	4770	tags=61%, list=46%, signal=112%
REACTOME_DEATH_RECEPTOR_SIGNALLING		117	-0.0826646	-1.04248	0.385633	0.567367	1	3308	tags=40%, list=32%, signal=58%
REACTOME_RAB_GERANYLGERANYLATION		48	-0.127594	-1.0405	0.383721	0.568848	1	3210	tags=44%, list=31%, signal=63%
REACTOME_PI_METABOLISM		75	-0.100897	-1.03377	0.391919	0.578086	1	2273	tags=32%, list=22%, signal=41%
REACTOME_TRAF6_MEDIATED_NF_KB_ACTIVATION		20	-0.193093	-1.03208	0.420202	0.578988	1	6794	tags=85%, list=66%, signal=248%
REACTOME_NR1H2_AND_NR1H3_MEDIATED_SIGNALING		34	-0.148384	-1.03047	0.39521	0.579654	1	3640	tags=50%, list=35%, signal=77%
REACTOME_COSTIMULATION_BY_THE_CD28_FAMILY		54	-0.116677	-1.02988	0.405622	0.578704	1	3012	tags=41%, list=29%, signal=57%
REACTOME_FORMATION_OF_RNA_POL_II_ELONGATION_COMPLEX		51	-0.122349	-1.02446	0.394059	0.585982	1	6646	tags=76%, list=64%, signal=213%
REACTOME_EPH_EPHRIN_SIGNALING		64	-0.109477	-1.02295	0.411881	0.586564	1	4690	tags=56%, list=45%, signal=102%
REACTOME_PI3K_AKT_SIGNALING_IN_CANCER		63	-0.110402	-1.02267	0.407332	0.585058	1	2476	tags=35%, list=24%, signal=46%
REACTOME_ANTIGEN_PRESENTATION_FOLDING_ASSEMBLY_AND_PEPTIDE_LOADING_OF_CLASS_I_MHC		17	-0.203083	-1.02228	0.423372	0.583704	1	3985	tags=59%, list=39%, signal=96%
REACTOME_DISEASES_OF_SIGNAL_TRANSDUCTION_BY_GROWTH_FACTOR_RECEPTORS_AND_SECOND_MESSENGERS		311	-0.0491797	-1.02226	0.402778	0.581736	1	5390	tags=57%, list=52%, signal=115%
REACTOME_SIGNALING_BY_ERYTHROPOIETIN		23	-0.174309	-1.0158	0.402439	0.590621	1	2697	tags=43%, list=26%, signal=59%
REACTOME_ARACHIDONIC_ACID_METABOLISM		27	-0.167658	-1.01105	0.402464	0.59675	1	8225	tags=96%, list=80%, signal=470%
REACTOME_PURINE_CATABOLISM		15	-0.215504	-1.00964	0.433735	0.597149	1	6045	tags=80%, list=58%, signal=192%
REACTOME_TRANSCRIPTIONAL_REGULATION_OF_WHITE_ADIPOCYTE_DIFFERENTIATION		70	-0.103417	-1.00366	0.438155	0.605442	1	7798	tags=86%, list=75%, signal=347%
REACTOME_INHIBITION_OF_DNA_RECOMBINATION_AT_TELOMERE		19	-0.191001	-1.00001	0.438134	0.6099	1	4558	tags=63%, list=44%, signal=113%
REACTOME_HIV_ELONGATION_ARREST_AND_RECOVERY		27	-0.161697	-0.999492	0.428	0.6087	1	5607	tags=70%, list=54%, signal=153%
REACTOME_RAF_ACTIVATION		32	-0.149195	-0.999239	0.41954	0.607051	1	7184	tags=84%, list=70%, signal=276%
REACTOME_RET_SIGNALING		28	-0.160013	-0.996985	0.442718	0.608871	1	6103	tags=75%, list=59%, signal=183%
REACTOME_METABOLISM_OF_STEROID_HORMONES		15	-0.214535	-0.995787	0.442656	0.60903	1	5366	tags=73%, list=52%, signal=152%
REACTOME_REGULATION_OF_PTEN_GENE_TRANSCRIPTION		56	-0.116491	-0.994692	0.444668	0.608967	1	1941	tags=30%, list=19%, signal=37%
REACTOME_NOTCH_HLH_TRANSCRIPTION_PATHWAY		24	-0.169855	-0.990108	0.435318	0.614905	1	4709	tags=63%, list=46%, signal=115%
REACTOME_DUAL_INCISION_IN_TC_NER		57	-0.110563	-0.989021	0.439922	0.614871	1	5392	tags=63%, list=52%, signal=131%
REACTOME_JNK_C_JUN_KINASES_PHOSPHORYLATION_AND_ACTIVATION_MEDIATED_BY_ACTIVATED_HUMAN_TAK1		19	-0.187603	-0.984052	0.459016	0.621286	1	5137	tags=68%, list=50%, signal=136%
REACTOME_NEGATIVE_REGULATORS_OF_DDX58_IFIH1_SIGNALING		30	-0.153372	-0.980182	0.448207	0.626136	1	6344	tags=77%, list=61%, signal=198%
REACTOME_COMPLEMENT_CASCADE		20	-0.182089	-0.979536	0.442656	0.625348	1	3807	tags=55%, list=37%, signal=87%
REACTOME_FOXO_MEDIATED_TRANSCRIPTION		50	-0.116257	-0.979249	0.462151	0.623815	1	7280	tags=82%, list=70%, signal=276%
REACTOME_RHO_GTPASES_ACTIVATE_NADPH_OXIDASES		22	-0.174943	-0.976992	0.47412	0.625676	1	1955	tags=36%, list=19%, signal=45%
REACTOME_OTHER_INTERLEUKIN_SIGNALING		18	-0.192514	-0.976758	0.45674	0.624085	1	5479	tags=72%, list=53%, signal=153%
REACTOME_PYRUVATE_METABOLISM_AND_CITRIC_ACID_TCA_CYCLE		46	-0.123724	-0.975928	0.453441	0.62357	1	9063	tags=100%, list=88%, signal=809%
REACTOME_REGULATION_OF_TP53_ACTIVITY_THROUGH_ACETYLATION		29	-0.151295	-0.973295	0.449187	0.626101	1	8064	tags=93%, list=78%, signal=423%
REACTOME_NEGATIVE_REGULATION_OF_MAPK_PATHWAY		40	-0.131253	-0.972293	0.481328	0.625806	1	6401	tags=75%, list=62%, signal=196%
REACTOME_SULFUR_AMINO_ACID_METABOLISM		20	-0.18381	-0.970949	0.46332	0.626246	1	6373	tags=80%, list=62%, signal=208%
REACTOME_METABOLISM_OF_PORPHYRINS		17	-0.193009	-0.965801	0.461538	0.633355	1	3481	tags=53%, list=34%, signal=80%
REACTOME_TRANSLATION_OF_SARS_COV_2_STRUCTURAL_PROTEINS		40	-0.126032	-0.964204	0.51	0.634212	1	3871	tags=50%, list=37%, signal=80%
REACTOME_RETROGRADE_TRANSPORT_AT_THE_TRANS_GOLGI_NETWORK		45	-0.122514	-0.960367	0.485437	0.638657	1	6549	tags=76%, list=63%, signal=205%
REACTOME_DOWNREGULATION_OF_TGF_BETA_RECEPTOR_SIGNALING		24	-0.161587	-0.958154	0.472505	0.640468	1	488	tags=21%, list=5%, signal=22%
REACTOME_SIGNALING_BY_RECEPTOR_TYROSINE_KINASES		342	-0.0437596	-0.952192	0.492032	0.648776	1	3462	tags=38%, list=33%, signal=55%
REACTOME_METABOLISM_OF_COFACTORS		15	-0.203101	-0.948077	0.511202	0.653823	1	3417	tags=53%, list=33%, signal=80%
REACTOME_GLOBAL_GENOME_NUCLEOTIDE_EXCISION_REPAIR_GG_NER		76	-0.0949551	-0.945984	0.516505	0.655253	1	7866	tags=86%, list=76%, signal=355%
REACTOME_SUMOYLATION_OF_INTRACELLULAR_RECEPTORS		19	-0.178231	-0.931922	0.515528	0.677807	1	1970	tags=37%, list=19%, signal=45%
REACTOME_DAP12_INTERACTIONS		30	-0.142407	-0.931203	0.542146	0.676887	1	3012	tags=43%, list=29%, signal=61%
REACTOME_CONSTITUTIVE_SIGNALING_BY_AKT1_E17K_IN_CANCER		23	-0.15779	-0.930674	0.506849	0.675698	1	2418	tags=39%, list=23%, signal=51%
REACTOME_TBC_RABGAPS		39	-0.127817	-0.929628	0.502879	0.675546	1	3455	tags=46%, list=33%, signal=69%
REACTOME_INTRAFLAGELLAR_TRANSPORT		41	-0.12374	-0.928047	0.528302	0.676202	1	8306	tags=93%, list=80%, signal=470%
REACTOME_PEPTIDE_HORMONE_METABOLISM		39	-0.122766	-0.923865	0.547325	0.681548	1	7482	tags=85%, list=72%, signal=305%
REACTOME_GLYCOGEN_METABOLISM		23	-0.159224	-0.919007	0.557312	0.687839	1	5998	tags=74%, list=58%, signal=176%
REACTOME_RIP_MEDIATED_NFKB_ACTIVATION_VIA_ZBP1		17	-0.188426	-0.91731	0.571717	0.688792	1	6568	tags=82%, list=64%, signal=226%
REACTOME_GENERATION_OF_SECOND_MESSENGER_MOLECULES		19	-0.176864	-0.916523	0.545988	0.688186	1	3072	tags=47%, list=30%, signal=67%
REACTOME_PEROXISOMAL_LIPID_METABOLISM		25	-0.15065	-0.906632	0.545635	0.703594	1	3822	tags=52%, list=37%, signal=82%
REACTOME_SARS_COV_INFECTIONS		124	-0.0696892	-0.89221	0.593688	0.726983	1	7124	tags=76%, list=69%, signal=241%
REACTOME_PLATELET_AGGREGATION_PLUG_FORMATION		26	-0.151906	-0.891086	0.619919	0.726922	1	1615	tags=31%, list=16%, signal=36%
REACTOME_KERATAN_SULFATE_BIOSYNTHESIS		15	-0.195833	-0.89028	0.599589	0.726236	1	5559	tags=73%, list=54%, signal=158%
REACTOME_IRON_UPTAKE_AND_TRANSPORT		42	-0.11632	-0.889886	0.561644	0.724762	1	6678	tags=76%, list=65%, signal=214%
REACTOME_APOPTOSIS		148	-0.0634201	-0.887112	0.571984	0.727503	1	2637	tags=32%, list=26%, signal=42%
REACTOME_CLASS_I_PEROXISOMAL_MEMBRANE_PROTEIN_IMPORT		18	-0.171658	-0.880303	0.589792	0.737204	1	8565	tags=100%, list=83%, signal=583%
REACTOME_PROCESSING_OF_INTRONLESS_PRE_MRNAS		18	-0.167604	-0.879022	0.614604	0.73722	1	2291	tags=39%, list=22%, signal=50%
REACTOME_CLASS_A_1_RHODOPSIN_LIKE_RECEPTORS		91	-0.0785826	-0.876651	0.586538	0.739067	1	786	tags=15%, list=8%, signal=17%
REACTOME_ION_CHANNEL_TRANSPORT		98	-0.0741667	-0.875948	0.614931	0.738181	1	8944	tags=94%, list=87%, signal=691%
REACTOME_FLT3_SIGNALING		34	-0.124922	-0.870743	0.608787	0.745124	1	538	tags=18%, list=5%, signal=19%
REACTOME_SIGNALLING_TO_RAS		15	-0.18595	-0.870621	0.635246	0.743203	1	1527	tags=33%, list=15%, signal=39%
REACTOME_HDACS_DEACETYLATE_HISTONES		31	-0.133368	-0.868304	0.617357	0.745071	1	8295	tags=94%, list=80%, signal=473%
REACTOME_MHC_CLASS_II_ANTIGEN_PRESENTATION		94	-0.0765031	-0.868047	0.618474	0.743335	1	317	tags=11%, list=3%, signal=11%
REACTOME_CELL_CELL_COMMUNICATION		64	-0.0927703	-0.867888	0.615079	0.741501	1	663	tags=16%, list=6%, signal=17%
REACTOME_SMAD2_SMAD3_SMAD4_HETEROTRIMER_REGULATES_TRANSCRIPTION		29	-0.136482	-0.862321	0.629845	0.748933	1	5722	tags=69%, list=55%, signal=154%
REACTOME_TCF_DEPENDENT_SIGNALING_IN_RESPONSE_TO_WNT		132	-0.0649118	-0.861369	0.626016	0.74851	1	2862	tags=34%, list=28%, signal=47%
REACTOME_PROCESSING_OF_CAPPED_INTRONLESS_PRE_MRNA		25	-0.143957	-0.860944	0.627863	0.74716	1	1824	tags=32%, list=18%, signal=39%
REACTOME_NGF_STIMULATED_TRANSCRIPTION		32	-0.125467	-0.851667	0.656805	0.760825	1	1938	tags=31%, list=19%, signal=38%
REACTOME_CHAPERONE_MEDIATED_AUTOPHAGY		16	-0.178427	-0.851415	0.660886	0.759061	1	6557	tags=81%, list=63%, signal=222%
REACTOME_CYCLIN_A_CDK2_ASSOCIATED_EVENTS_AT_S_PHASE_ENTRY		80	-0.0807838	-0.838428	0.650103	0.778978	1	7053	tags=76%, list=68%, signal=238%
REACTOME_CD28_DEPENDENT_PI3K_AKT_SIGNALING		20	-0.157368	-0.837129	0.64902	0.77896	1	8196	tags=95%, list=79%, signal=458%
REACTOME_POTASSIUM_CHANNELS		36	-0.116273	-0.83706	0.676923	0.776879	1	3971	tags=50%, list=38%, signal=81%
REACTOME_BUTYRATE_RESPONSE_FACTOR_1_BRF1_BINDS_AND_DESTABILIZES_MRNA		16	-0.174926	-0.835516	0.660079	0.777215	1	7885	tags=94%, list=76%, signal=395%
REACTOME_TRISTETRAPROLIN_TTP_ZFP36_BINDS_AND_DESTABILIZES_MRNA		16	-0.174926	-0.831779	0.665441	0.781156	1	7885	tags=94%, list=76%, signal=395%
REACTOME_TRANSPORT_OF_SMALL_MOLECULES		432	-0.0355034	-0.831461	0.668712	0.779468	1	8860	tags=89%, list=86%, signal=598%
REACTOME_INTERLEUKIN_RECEPTOR_SHC_SIGNALING		21	-0.149921	-0.830689	0.64902	0.778552	1	2884	tags=43%, list=28%, signal=59%
REACTOME_CONSTITUTIVE_SIGNALING_BY_ABERRANT_PI3K_IN_CANCER		39	-0.109654	-0.819288	0.680473	0.794761	1	3642	tags=46%, list=35%, signal=71%
REACTOME_TGF_BETA_RECEPTOR_SIGNALING_ACTIVATES_SMADS		29	-0.125645	-0.817579	0.682	0.79527	1	488	tags=17%, list=5%, signal=18%
REACTOME_ORC1_REMOVAL_FROM_CHROMATIN		65	-0.0874391	-0.812924	0.682446	0.800914	1	5145	tags=58%, list=50%, signal=116%
REACTOME_RECYCLING_PATHWAY_OF_L1		34	-0.115931	-0.803426	0.686192	0.814197	1	7014	tags=79%, list=68%, signal=246%
REACTOME_E3_UBIQUITIN_LIGASES_UBIQUITINATE_TARGET_PROTEINS		37	-0.111236	-0.797819	0.715768	0.821434	1	3604	tags=46%, list=35%, signal=70%
REACTOME_NEGATIVE_REGULATION_OF_THE_PI3K_AKT_NETWORK		72	-0.0804955	-0.795875	0.723108	0.822266	1	4773	tags=54%, list=46%, signal=100%
REACTOME_VXPX_CARGO_TARGETING_TO_CILIUM		17	-0.161186	-0.774697	0.748479	0.853286	1	7457	tags=88%, list=72%, signal=316%
REACTOME_SIGNALING_BY_FGFR2_IN_DISEASE		25	-0.12935	-0.773986	0.776	0.851993	1	6522	tags=76%, list=63%, signal=205%
REACTOME_DISEASES_ASSOCIATED_WITH_O_GLYCOSYLATION_OF_PROTEINS		24	-0.128152	-0.762028	0.763779	0.868386	1	8584	tags=96%, list=83%, signal=564%
REACTOME_DISEASES_ASSOCIATED_WITH_N_GLYCOSYLATION_OF_PROTEINS		16	-0.159227	-0.760034	0.737255	0.869089	1	8047	tags=94%, list=78%, signal=423%
REACTOME_EFFECTS_OF_PIP2_HYDROLYSIS		20	-0.141953	-0.755895	0.774757	0.872812	1	2154	tags=35%, list=21%, signal=44%
REACTOME_TP53_REGULATES_TRANSCRIPTION_OF_CELL_DEATH_GENES		31	-0.114456	-0.748808	0.778884	0.880955	1	5156	tags=61%, list=50%, signal=122%
REACTOME_ASSEMBLY_OF_THE_PRE_REPLICATIVE_COMPLEX		64	-0.0808998	-0.748225	0.760825	0.879395	1	5145	tags=58%, list=50%, signal=114%
REACTOME_SIGNALING_BY_NTRKS		106	-0.0623228	-0.745833	0.770526	0.880629	1	1606	tags=22%, list=16%, signal=25%
REACTOME_EPHA_MEDIATED_GROWTH_CONE_COLLAPSE		15	-0.16095	-0.741432	0.784114	0.884756	1	4541	tags=60%, list=44%, signal=107%
REACTOME_PHASE_I_FUNCTIONALIZATION_OF_COMPOUNDS		36	-0.105374	-0.73742	0.78826	0.888305	1	3222	tags=42%, list=31%, signal=60%
REACTOME_SIGNALING_BY_TYPE_1_INSULIN_LIKE_GROWTH_FACTOR_1_RECEPTOR_IGF1R		30	-0.111548	-0.728141	0.806316	0.899246	1	1952	tags=30%, list=19%, signal=37%
REACTOME_TRANSCRIPTIONAL_ACTIVITY_OF_SMAD2_SMAD3_SMAD4_HETEROTRIMER		40	-0.0968188	-0.720098	0.830339	0.90813	1	5722	tags=65%, list=55%, signal=145%
REACTOME_DARPP_32_EVENTS		20	-0.132816	-0.717724	0.82	0.908993	1	6899	tags=80%, list=67%, signal=240%
REACTOME_REGULATION_OF_TP53_ACTIVITY_THROUGH_METHYLATION		15	-0.155136	-0.706561	0.82582	0.921363	1	5290	tags=67%, list=51%, signal=136%
REACTOME_DISORDERS_OF_TRANSMEMBRANE_TRANSPORTERS		118	-0.0558781	-0.699939	0.840445	0.927493	1	9152	tags=94%, list=89%, signal=812%
REACTOME_SIGNALING_BY_FGFR_IN_DISEASE		43	-0.0903434	-0.685272	0.879668	0.943799	1	6522	tags=72%, list=63%, signal=195%
REACTOME_ROLE_OF_PHOSPHOLIPIDS_IN_PHAGOCYTOSIS		20	-0.127945	-0.68141	0.884849	0.94612	1	5399	tags=65%, list=52%, signal=136%
REACTOME_INSULIN_RECEPTOR_SIGNALLING_CASCADE		31	-0.101852	-0.679246	0.842105	0.946253	1	1952	tags=29%, list=19%, signal=36%
REACTOME_METABOLISM_OF_FAT_SOLUBLE_VITAMINS		21	-0.122718	-0.672927	0.87218	0.951519	1	1196	tags=24%, list=12%, signal=27%
REACTOME_SIGNALING_BY_WNT_IN_CANCER		27	-0.106832	-0.669247	0.871429	0.953233	1	8852	tags=96%, list=86%, signal=669%
REACTOME_STIMULI_SENSING_CHANNELS		52	-0.0786735	-0.665956	0.885827	0.954317	1	8732	tags=92%, list=84%, signal=592%
REACTOME_ERCC6_CSB_AND_EHMT2_G9A_POSITIVELY_REGULATE_RRNA_EXPRESSION		16	-0.13761	-0.665945	0.894942	0.951864	1	8916	tags=100%, list=86%, signal=727%
REACTOME_IRS_MEDIATED_SIGNALLING		27	-0.107802	-0.661153	0.862136	0.954627	1	1952	tags=30%, list=19%, signal=36%
REACTOME_KSRP_KHSRP_BINDS_AND_DESTABILIZES_MRNA		16	-0.134994	-0.660248	0.882239	0.953226	1	8943	tags=100%, list=87%, signal=741%
REACTOME_UPTAKE_AND_ACTIONS_OF_BACTERIAL_TOXINS		19	-0.122258	-0.658766	0.906746	0.952362	1	6899	tags=79%, list=67%, signal=237%
REACTOME_N_GLYCAN_ANTENNAE_ELONGATION_IN_THE_MEDIAL_TRANS_GOLGI		17	-0.129237	-0.647149	0.876827	0.962084	1	4139	tags=53%, list=40%, signal=88%
REACTOME_RAS_PROCESSING		20	-0.119535	-0.645417	0.889113	0.961268	1	7036	tags=80%, list=68%, signal=250%
REACTOME_DOWNREGULATION_OF_ERBB2_SIGNALING		19	-0.123763	-0.641259	0.900596	0.962994	1	1444	tags=26%, list=14%, signal=31%
REACTOME_NUCLEAR_EVENTS_KINASE_AND_TRANSCRIPTION_FACTOR_ACTIVATION		53	-0.0736238	-0.640398	0.921415	0.961407	1	414	tags=11%, list=4%, signal=12%
REACTOME_LISTERIA_MONOCYTOGENES_ENTRY_INTO_HOST_CELLS		16	-0.133619	-0.640012	0.917505	0.959386	1	560	tags=19%, list=5%, signal=20%
REACTOME_DEACTIVATION_OF_THE_BETA_CATENIN_TRANSACTIVATING_COMPLEX		32	-0.0968498	-0.638366	0.913534	0.958578	1	618	tags=16%, list=6%, signal=17%
REACTOME_DISASSEMBLY_OF_THE_DESTRUCTION_COMPLEX_AND_RECRUITMENT_OF_AXIN_TO_THE_MEMBRANE		25	-0.103841	-0.630718	0.915187	0.963174	1	8852	tags=96%, list=86%, signal=667%
REACTOME_RHO_GTPASES_ACTIVATE_WASPS_AND_WAVES		32	-0.0934345	-0.627317	0.924335	0.963891	1	2591	tags=34%, list=25%, signal=46%
REACTOME_SIGNALING_BY_TGF_BETA_RECEPTOR_COMPLEX		65	-0.0677702	-0.626587	0.913758	0.962119	1	5824	tags=63%, list=56%, signal=144%
REACTOME_UNFOLDED_PROTEIN_RESPONSE_UPR		80	-0.0593308	-0.620599	0.928429	0.965028	1	5206	tags=56%, list=50%, signal=112%
REACTOME_CONSTITUTIVE_SIGNALING_BY_LIGAND_RESPONSIVE_EGFR_CANCER_VARIANTS		17	-0.122168	-0.605118	0.933594	0.97572	1	3604	tags=47%, list=35%, signal=72%
REACTOME_SIGNALING_BY_EGFR_IN_CANCER		17	-0.122168	-0.604792	0.939335	0.97354	1	3604	tags=47%, list=35%, signal=72%
REACTOME_ZINC_TRANSPORTERS		16	-0.124952	-0.599056	0.924099	0.975653	1	5171	tags=63%, list=50%, signal=125%
REACTOME_NEGATIVE_REGULATION_OF_MET_ACTIVITY		17	-0.122168	-0.594587	0.947257	0.976471	1	3604	tags=47%, list=35%, signal=72%
REACTOME_SIGNALING_BY_TGFB_FAMILY_MEMBERS		76	-0.0574027	-0.591926	0.948	0.975927	1	500	tags=11%, list=5%, signal=11%
REACTOME_TRANSPORT_OF_INORGANIC_CATIONS_ANIONS_AND_AMINO_ACIDS_OLIGOPEPTIDES		59	-0.0653456	-0.591392	0.951807	0.97388	1	9139	tags=95%, list=88%, signal=816%
REACTOME_TRANSPORT_OF_VITAMINS_NUCLEOSIDES_AND_RELATED_MOLECULES		25	-0.0958875	-0.577542	0.966926	0.980435	1	666	tags=16%, list=6%, signal=17%
REACTOME_CELL_SURFACE_INTERACTIONS_AT_THE_VASCULAR_WALL		83	-0.0503493	-0.538191	0.962525	0.998465	1	730	tags=12%, list=7%, signal=13%
REACTOME_NEGATIVE_REGULATION_OF_FGFR1_SIGNALING		18	-0.10242	-0.527349	0.97271	1	1	4686	tags=56%, list=45%, signal=101%
REACTOME_NEGATIVE_REGULATION_OF_FGFR3_SIGNALING		18	-0.10242	-0.523868	0.986028	0.999174	1	4686	tags=56%, list=45%, signal=101%
REACTOME_GLYOXYLATE_METABOLISM_AND_GLYCINE_DEGRADATION		23	-0.0829764	-0.479082	0.994152	1	1	9031	tags=96%, list=87%, signal=756%
REACTOME_GPVI_MEDIATED_ACTIVATION_CASCADE		28	-0.0764806	-0.470475	0.987755	1	1	3642	tags=43%, list=35%, signal=66%
REACTOME_SPRY_REGULATION_OF_FGF_SIGNALING		15	-0.0981589	-0.464406	0.99596	1	1	366	tags=13%, list=4%, signal=14%
REACTOME_PARASITE_INFECTION		53	-0.0535888	-0.454238	0.993915	1	1	1790	tags=23%, list=17%, signal=27%
REACTOME_SIGNALING_BY_ERBB2		39	-0.0603147	-0.442952	0.997921	1	1	2560	tags=31%, list=25%, signal=41%
REACTOME_FCGAMMA_RECEPTOR_FCGR_DEPENDENT_PHAGOCYTOSIS		76	-0.0391569	-0.408769	1	1	1	2591	tags=29%, list=25%, signal=38%
REACTOME_INTERLEUKIN_10_SIGNALING		31	-0.0537186	-0.356619	1	0.999951	1	6782	tags=71%, list=66%, signal=206%

## Sheet: WT_Both_vs_KO_Both_Hallmark_pos
NAME	GS DETAILS	SIZE	ES	NES	NOM p-val	FDR q-val	FWER p-val	RANK AT MAX	LEADING EDGE
HALLMARK_E2F_TARGETS	Details ...	186	0.47195	7.4113	0	0	0	2377	tags=69%, list=23%, signal=88%
HALLMARK_G2M_CHECKPOINT	Details ...	179	0.445157	6.8674	0	0	0	2291	tags=66%, list=22%, signal=83%
HALLMARK_MITOTIC_SPINDLE	Details ...	186	0.28777	4.55477	0	0	0	2746	tags=55%, list=27%, signal=73%
HALLMARK_ANDROGEN_RESPONSE	Details ...	80	0.197361	2.06498	0.00604839	0.0188992	0.072	4822	tags=66%, list=47%, signal=123%
HALLMARK_UV_RESPONSE_DN	Details ...	96	0.174309	1.96911	0.00420168	0.0294514	0.132	4243	tags=58%, list=41%, signal=98%
HALLMARK_ESTROGEN_RESPONSE_LATE	Details ...	131	0.135449	1.85274	0.0116054	0.0479017	0.233	2956	tags=42%, list=29%, signal=58%
HALLMARK_SPERMATOGENESIS	Details ...	70	0.175959	1.7425	0.0189873	0.0768106	0.39	7199	tags=87%, list=70%, signal=285%
HALLMARK_MTORC1_SIGNALING	Details ...	179	0.108053	1.70747	0.0277186	0.0792685	0.438	6292	tags=72%, list=61%, signal=180%
HALLMARK_ANGIOGENESIS	Details ...	21	0.314122	1.70731	0.023301	0.070572	0.438	3157	tags=62%, list=31%, signal=89%
HALLMARK_COAGULATION	Details ...	75	0.163002	1.6564	0.0262097	0.0836751	0.536	4941	tags=64%, list=48%, signal=122%
HALLMARK_MYC_TARGETS_V1	Details ...	179	0.107574	1.65516	0.0251572	0.0763561	0.536	3410	tags=44%, list=33%, signal=64%
HALLMARK_APICAL_JUNCTION	Details ...	122	0.11566	1.48443	0.0852713	0.159657	0.817	2291	tags=34%, list=22%, signal=43%
HALLMARK_HEME_METABOLISM	Details ...	162	0.0941709	1.39786	0.118908	0.216598	0.92	5931	tags=67%, list=57%, signal=154%
HALLMARK_KRAS_SIGNALING_DN	Details ...	66	0.146283	1.36985	0.120163	0.226813	0.944	2255	tags=36%, list=22%, signal=46%
HALLMARK_HEDGEHOG_SIGNALING	Details ...	22	0.233474	1.30027	0.166667	0.27926	0.977	4168	tags=64%, list=40%, signal=106%
HALLMARK_PROTEIN_SECRETION	Details ...	86	0.118437	1.26002	0.198819	0.304235	0.987	6957	tags=79%, list=67%, signal=240%
HALLMARK_GLYCOLYSIS	Details ...	146	0.0897227	1.25826	0.185259	0.288235	0.987	8358	tags=90%, list=81%, signal=462%
HALLMARK_IL2_STAT5_SIGNALING	Details ...	169	0.0791855	1.15855	0.273834	0.386599	0.999	1579	tags=23%, list=15%, signal=27%
HALLMARK_APICAL_SURFACE	Details ...	22	0.197597	1.13184	0.294922	0.401754	1	4538	tags=64%, list=44%, signal=113%
HALLMARK_EPITHELIAL_MESENCHYMAL_TRANSITION	Details ...	85	0.0997303	1.08137	0.346614	0.44872	1	4813	tags=56%, list=47%, signal=105%
HALLMARK_ESTROGEN_RESPONSE_EARLY		126	0.0800321	1.0569	0.357143	0.460854	1	6236	tags=68%, list=60%, signal=170%
HALLMARK_CHOLESTEROL_HOMEOSTASIS		63	0.104987	0.969807	0.50501	0.562784	1	7287	tags=81%, list=71%, signal=273%
HALLMARK_HYPOXIA		140	0.0664366	0.928527	0.495984	0.601875	1	4563	tags=51%, list=44%, signal=90%
HALLMARK_WNT_BETA_CATENIN_SIGNALING		31	0.107681	0.712206	0.870968	0.902134	1	223	tags=13%, list=2%, signal=13%
HALLMARK_APOPTOSIS		130	0.044341	0.582386	0.965517	0.99305	1	6622	tags=68%, list=64%, signal=188%
HALLMARK_BILE_ACID_METABOLISM		72	0.0589983	0.581978	0.953061	0.955229	1	4561	tags=50%, list=44%, signal=89%

## Sheet: WT_Both_vs_KO_Both_Hallmark_neg
NAME	GS DETAILS	SIZE	ES	NES	NOM p-val	FDR q-val	FWER p-val	RANK AT MAX	LEADING EDGE
HALLMARK_OXIDATIVE_PHOSPHORYLATION	Details ...	186	-0.203807	-3.26475	0	0	0	4767	tags=66%, list=46%, signal=121%
HALLMARK_INTERFERON_ALPHA_RESPONSE	Details ...	82	-0.288896	-3.09525	0	0	0	4097	tags=68%, list=40%, signal=112%
HALLMARK_INTERFERON_GAMMA_RESPONSE	Details ...	163	-0.175944	-2.58949	0	0.00180465	0.006	4742	tags=63%, list=46%, signal=115%
HALLMARK_ALLOGRAFT_REJECTION	Details ...	148	-0.177549	-2.47871	0	0.00157464	0.007	2452	tags=41%, list=24%, signal=53%
HALLMARK_FATTY_ACID_METABOLISM	Details ...	122	-0.174223	-2.24112	0.00186567	0.00678176	0.035	4914	tags=65%, list=48%, signal=122%
HALLMARK_TNFA_SIGNALING_VIA_NFKB	Details ...	167	-0.136332	-2.0366	0.00196078	0.0155355	0.094	1214	tags=25%, list=12%, signal=28%
HALLMARK_XENOBIOTIC_METABOLISM	Details ...	130	-0.127242	-1.64666	0.0301205	0.114367	0.566	5619	tags=67%, list=54%, signal=145%
HALLMARK_NOTCH_SIGNALING	Details ...	27	-0.246928	-1.5318	0.0698603	0.17192	0.769	2049	tags=44%, list=20%, signal=55%
HALLMARK_MYC_TARGETS_V2	Details ...	53	-0.170395	-1.48179	0.0559006	0.18936	0.842	7024	tags=85%, list=68%, signal=264%
HALLMARK_INFLAMMATORY_RESPONSE	Details ...	143	-0.103718	-1.44758	0.10119	0.201147	0.895	7183	tags=80%, list=70%, signal=258%
HALLMARK_P53_PATHWAY	Details ...	153	-0.0891751	-1.30379	0.148707	0.328578	0.97	7334	tags=80%, list=71%, signal=271%
HALLMARK_DNA_REPAIR	Details ...	130	-0.0873101	-1.12855	0.306163	0.559358	1	5629	tags=63%, list=54%, signal=137%
HALLMARK_TGF_BETA_SIGNALING	Details ...	43	-0.136801	-1.05557	0.373444	0.652953	1	8207	tags=93%, list=79%, signal=450%
HALLMARK_IL6_JAK_STAT3_SIGNALING	Details ...	68	-0.105949	-1.0283	0.426295	0.660216	1	1193	tags=22%, list=12%, signal=25%
HALLMARK_KRAS_SIGNALING_UP	Details ...	125	-0.0795612	-1.02683	0.421268	0.619	1	1173	tags=19%, list=11%, signal=21%
HALLMARK_REACTIVE_OXYGEN_SPECIES_PATHWAY	Details ...	45	-0.126725	-0.991999	0.477756	0.645226	1	8343	tags=93%, list=81%, signal=482%
HALLMARK_ADIPOGENESIS	Details ...	166	-0.0650204	-0.982519	0.458918	0.624285	1	7558	tags=80%, list=73%, signal=291%
HALLMARK_PI3K_AKT_MTOR_SIGNALING	Details ...	87	-0.0885185	-0.972162	0.490347	0.608141	1	7053	tags=77%, list=68%, signal=240%
HALLMARK_PEROXISOME	Details ...	80	-0.0839651	-0.869673	0.613546	0.747842	1	6762	tags=74%, list=65%, signal=212%
HALLMARK_COMPLEMENT	Details ...	137	-0.0562104	-0.7592	0.758483	0.885981	1	7047	tags=74%, list=68%, signal=229%
HALLMARK_UV_RESPONSE_UP		125	-0.0553771	-0.719363	0.853414	0.900926	1	6050	tags=64%, list=59%, signal=152%
HALLMARK_UNFOLDED_PROTEIN_RESPONSE		102	-0.0569151	-0.667562	0.86558	0.923341	1	8943	tags=92%, list=87%, signal=677%
HALLMARK_MYOGENESIS		101	-0.0488045	-0.560068	0.959927	0.966985	1	7790	tags=80%, list=75%, signal=322%

[truncated: 2 more sheets: WT_Both_vs_KO_Both_KEGG_pos, WT_Both_vs_KO_Both_KEGG_neg]
