# Supplementary material for: Orai3 and Orai1 mediate CRAC channel function and metabolic reprogramming in B cells
Source: eLife journal article supplement (doi:10.7554/elife.84708), 2023-02-21
Supplement: supp [file elife-84708-supp-v1.zip]

Mb1-Cre<sup>+</sup> Orai1/Orai3<sup>fl/fl</sup> Mb1-Cre<sup>+</sup>

IgM IgM

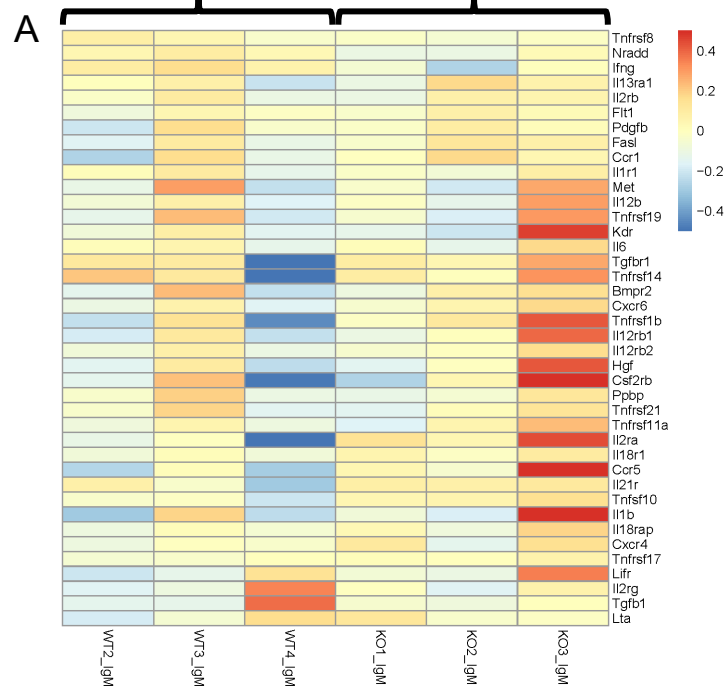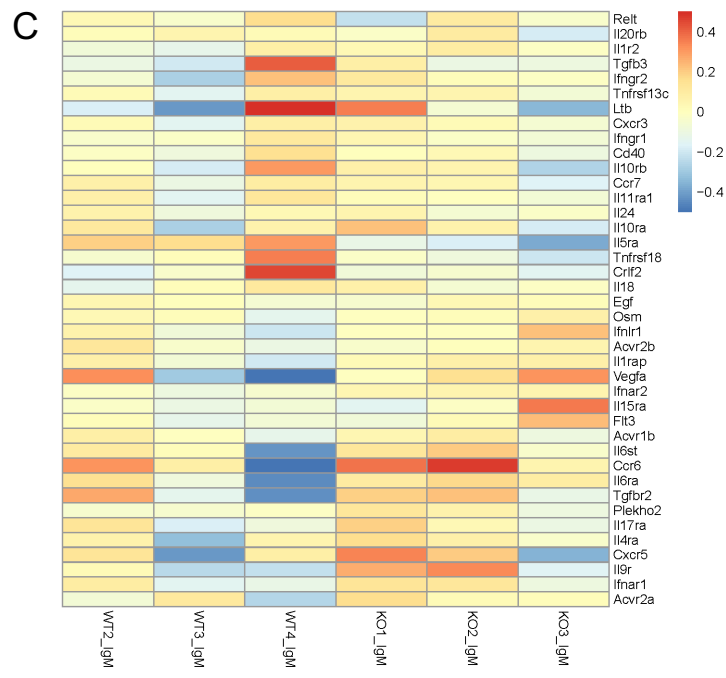

Mb1-Cre<sup>+</sup> Orai1/Orai3<sup>fl/fl</sup> Mb1-Cre<sup>+</sup>

IgM IgM

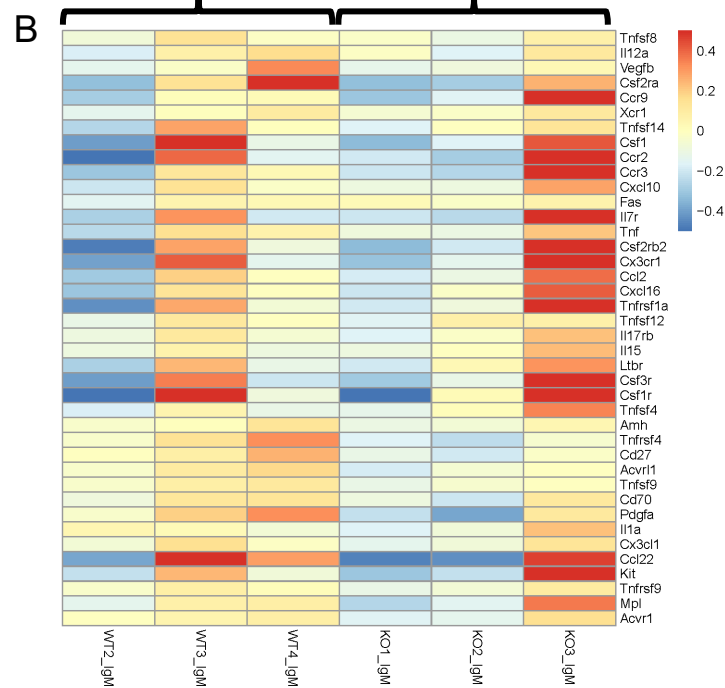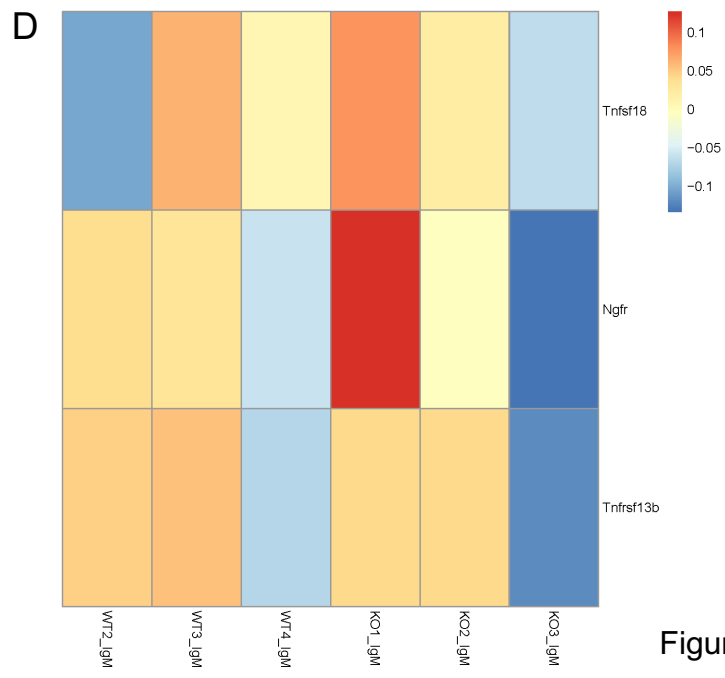

Figure. 10-Figure supplement 1
