# Supplementary material for: Orai3 and Orai1 mediate CRAC channel function and metabolic reprogramming in B cells
Source: eLife journal article supplement (doi:10.7554/elife.84708), 2023-02-21
Supplement: supp [file elife_poa_e84708_Figure_8_figure_supplement_1_source_data_1.xlsx]

## Sheet: Sheet1
Figure 8 - Figure Supplement 2A
Figure 8 - Figure Supplement 2B
Figure 8 - Figure Supplement 2C
											GAPDH
Figure 8 - Figure Supplement 2D
											GAPDH
