# Supplementary figures and images for: Orai3 and Orai1 mediate CRAC channel function and metabolic reprogramming in B cells
Source: eLife journal article supplement (doi:10.7554/elife.84708), 2023-02-21

Figure. 7-Figure supplement 1

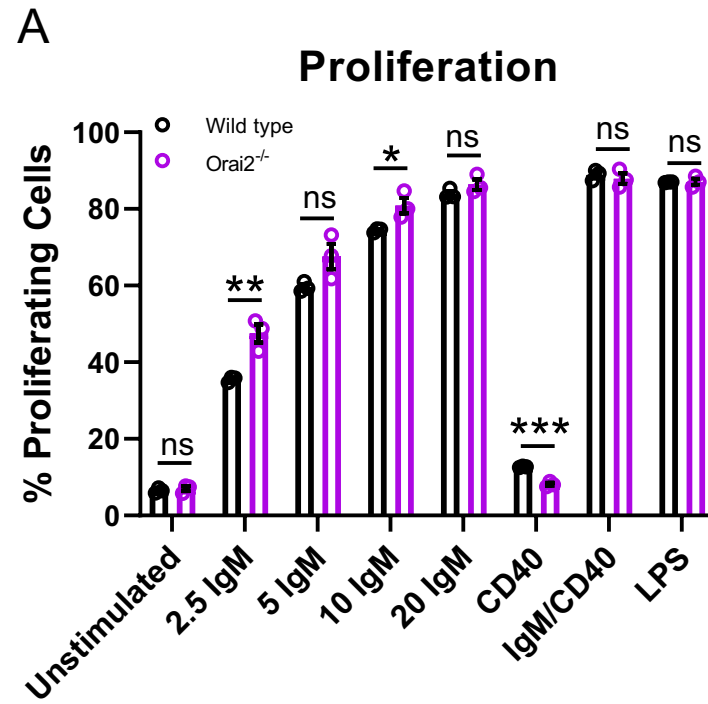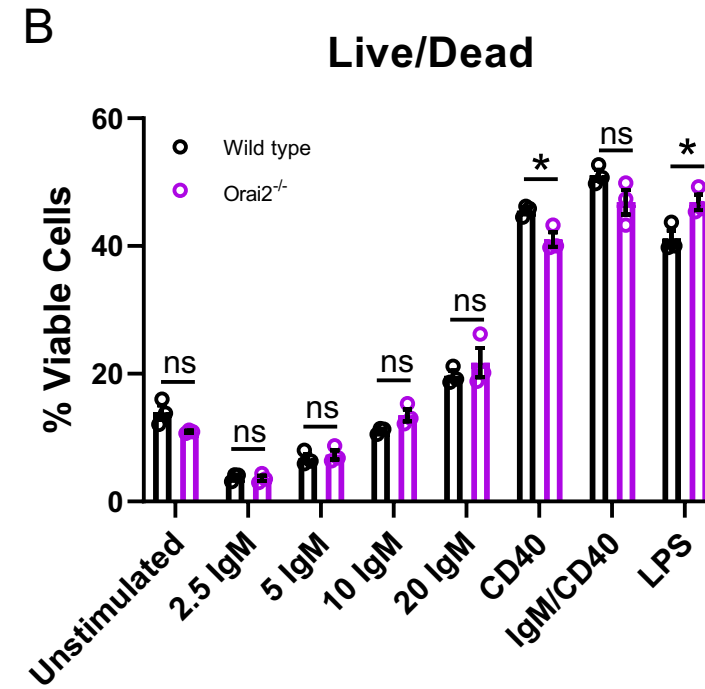

Supplement: supp [file elife-84708-supp-v1.zip]

Figure. 5-Figure supplement 1

A

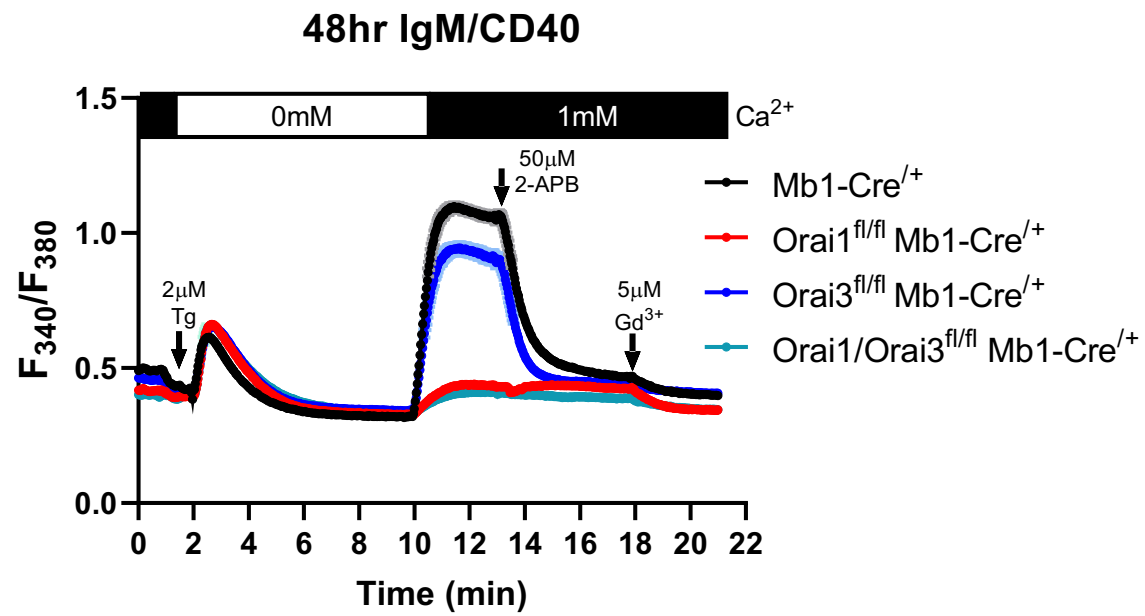

B

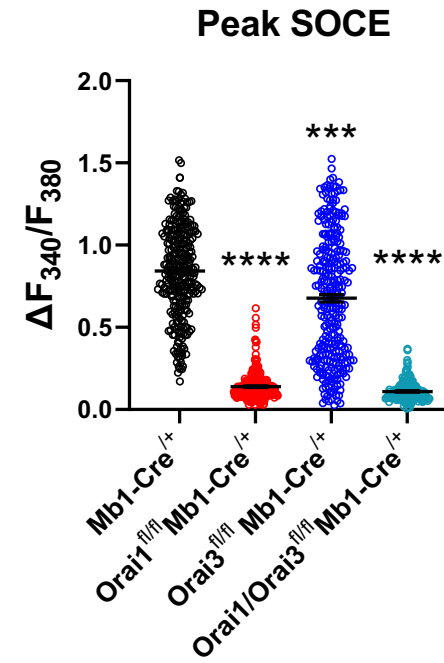

C

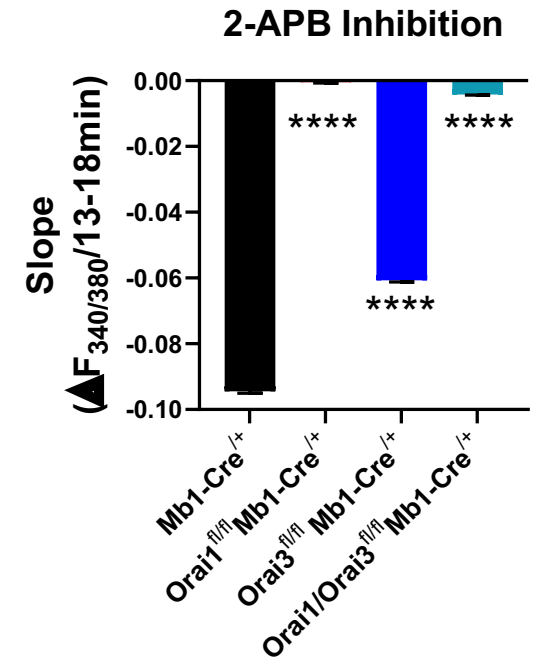

Supplement: supp [file elife-84708-supp-v1.zip]

Figure. 6-Figure supplement 1

## Naïve B cells

A

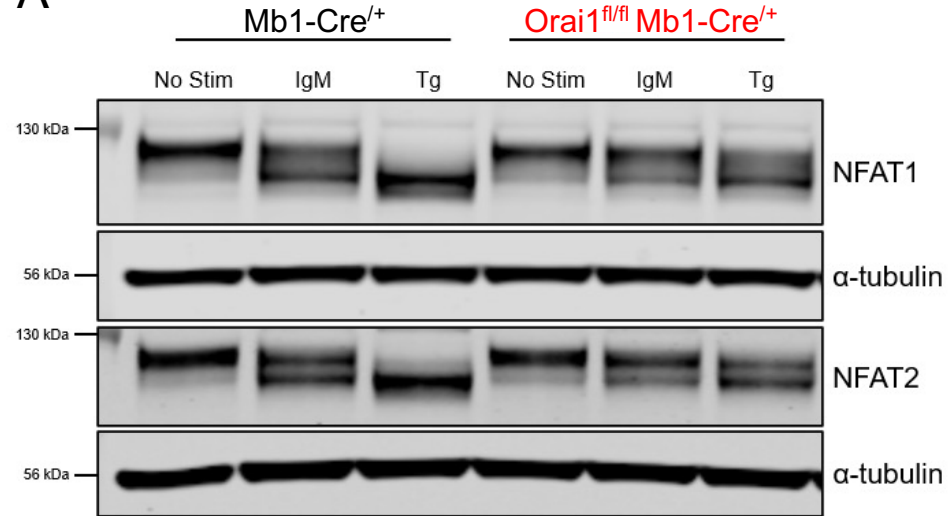

B

## Naïve B cells

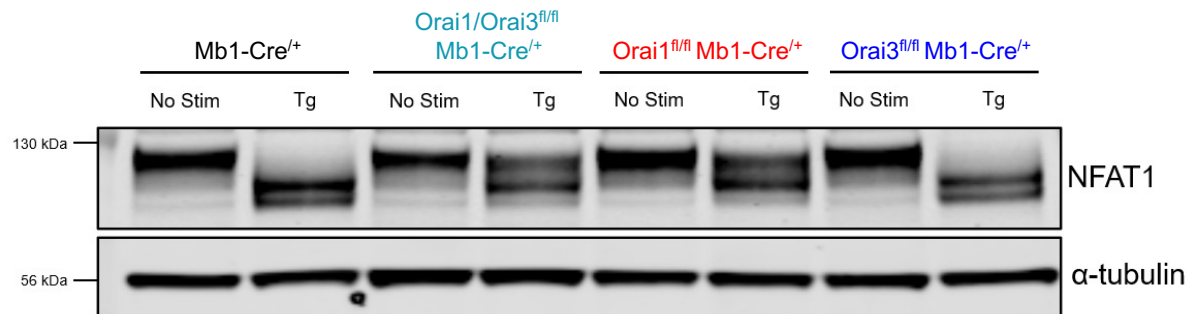

C

## 48hr IgM/CD40

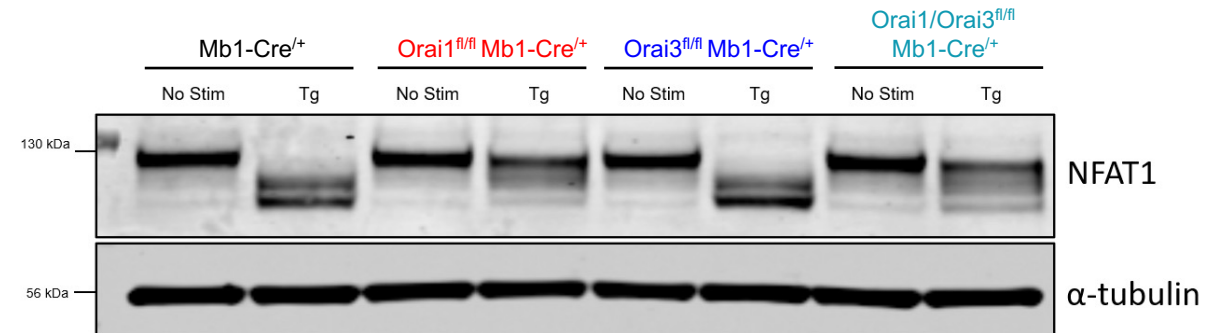

Supplement: supp [file elife-84708-supp-v1.zip]

Figure. 9-Figure supplement 1

A

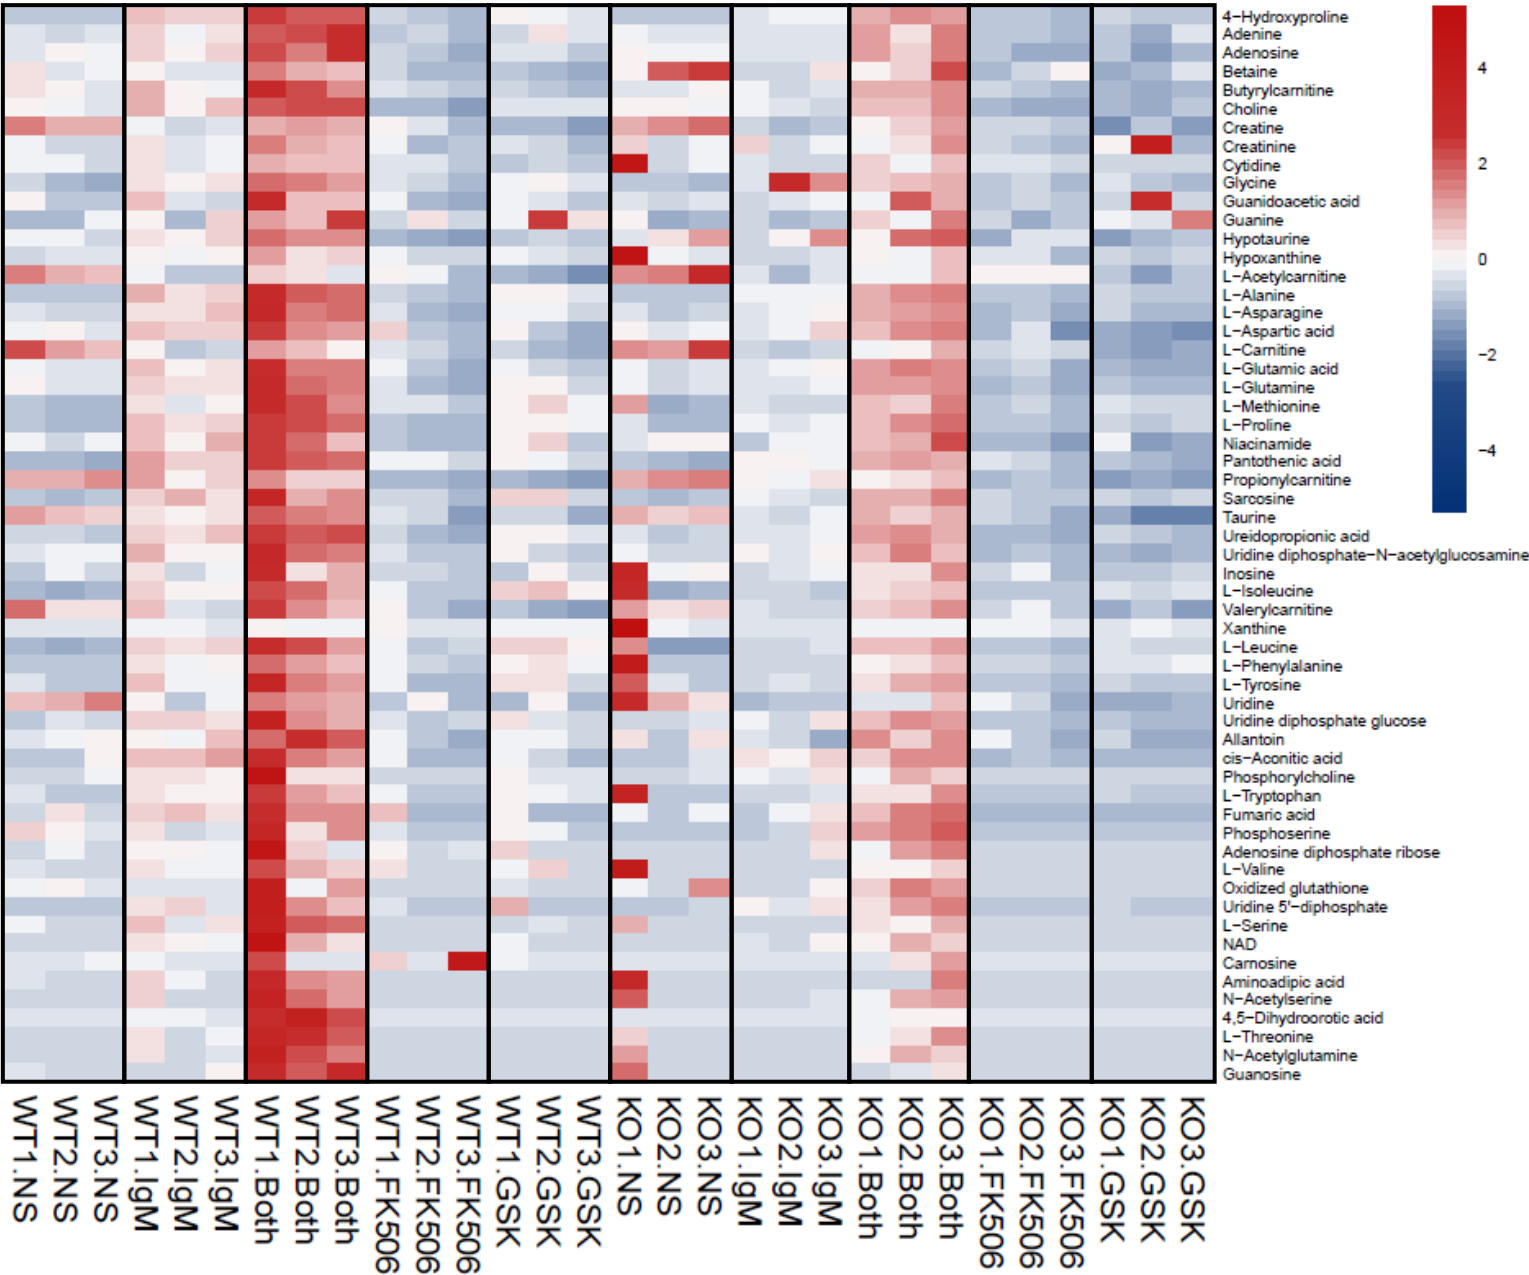

B

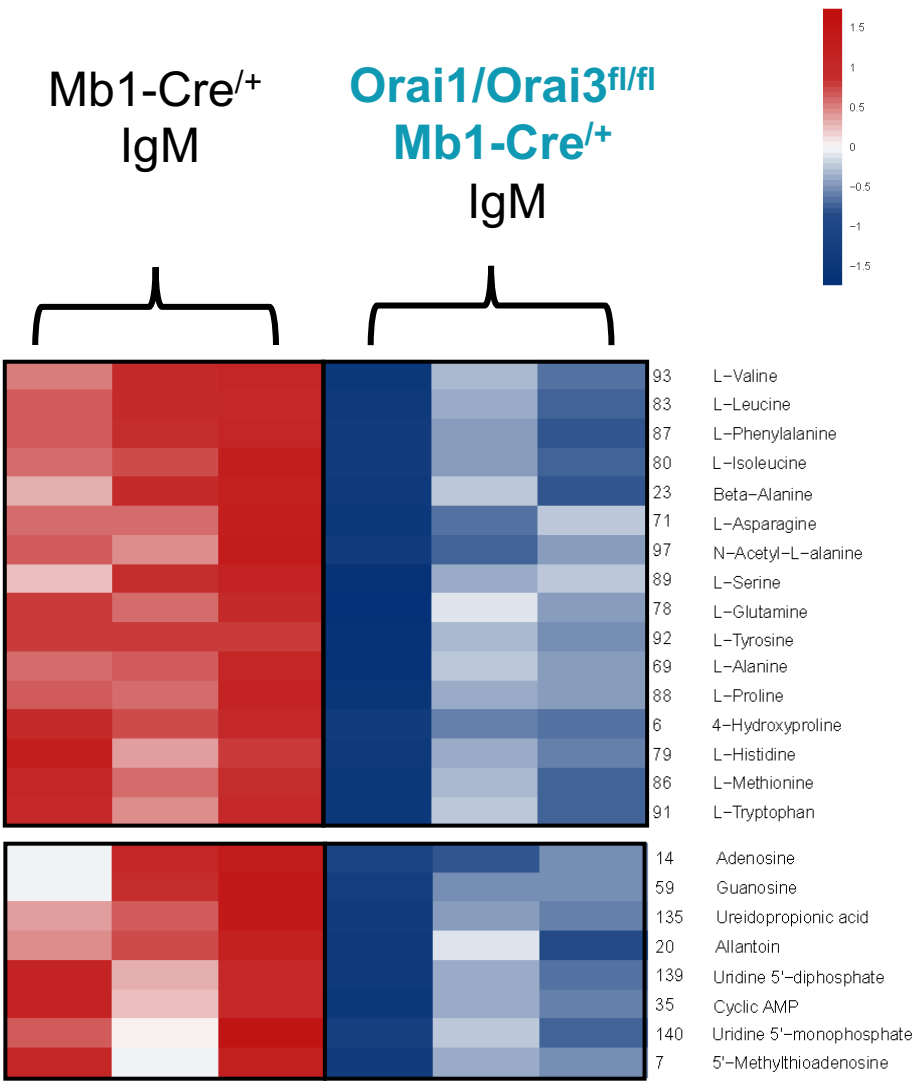

Supplement: supp [file elife-84708-supp-v1.zip]

Figure. 3-Figure supplement 1

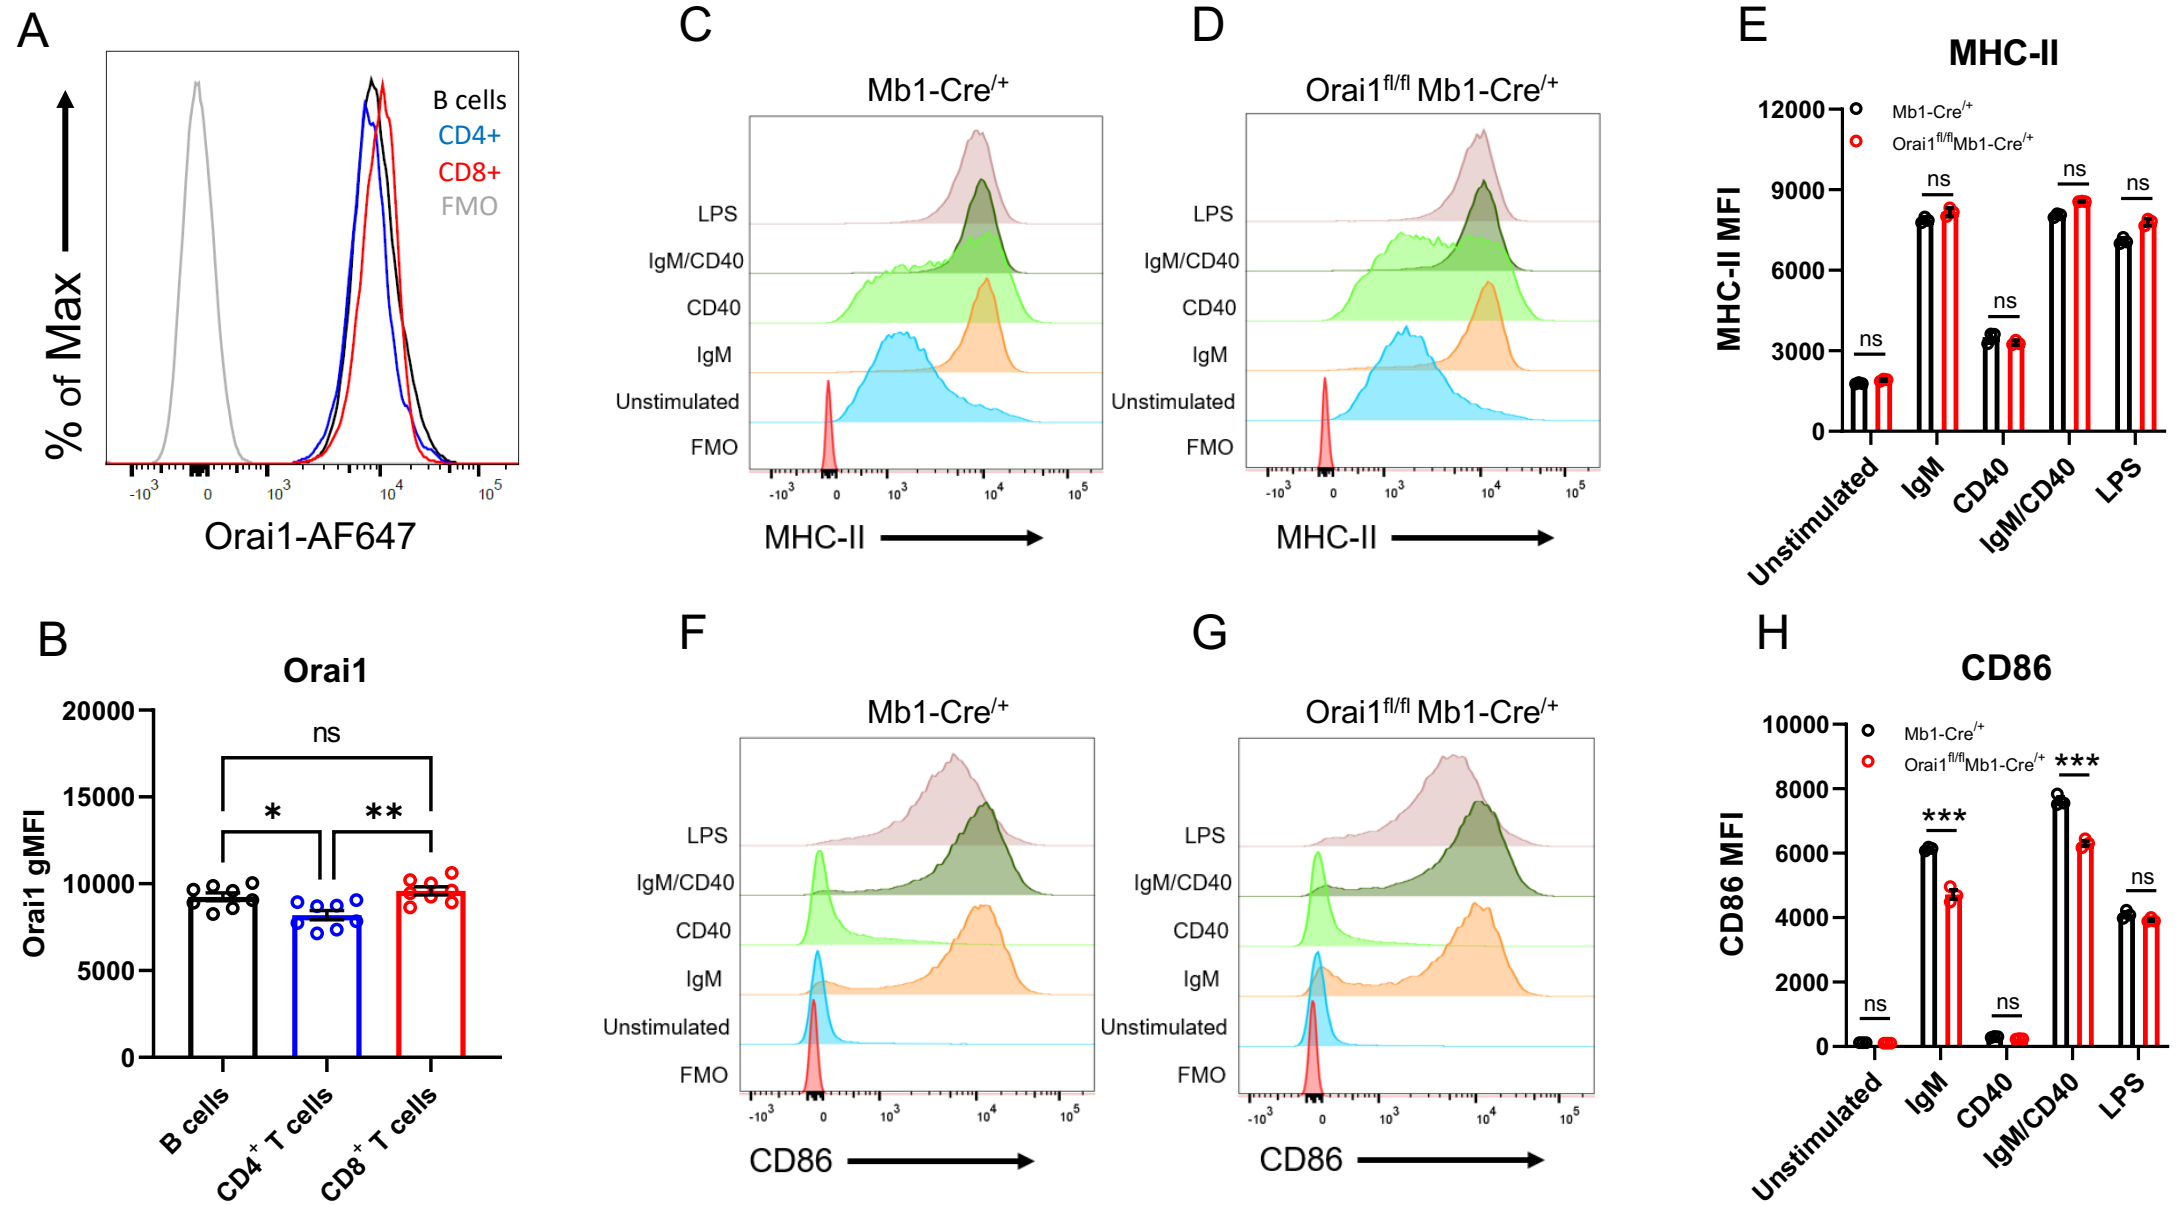

Supplement: supp [file elife-84708-supp-v1.zip]

Figure. 8-Figure supplement 1

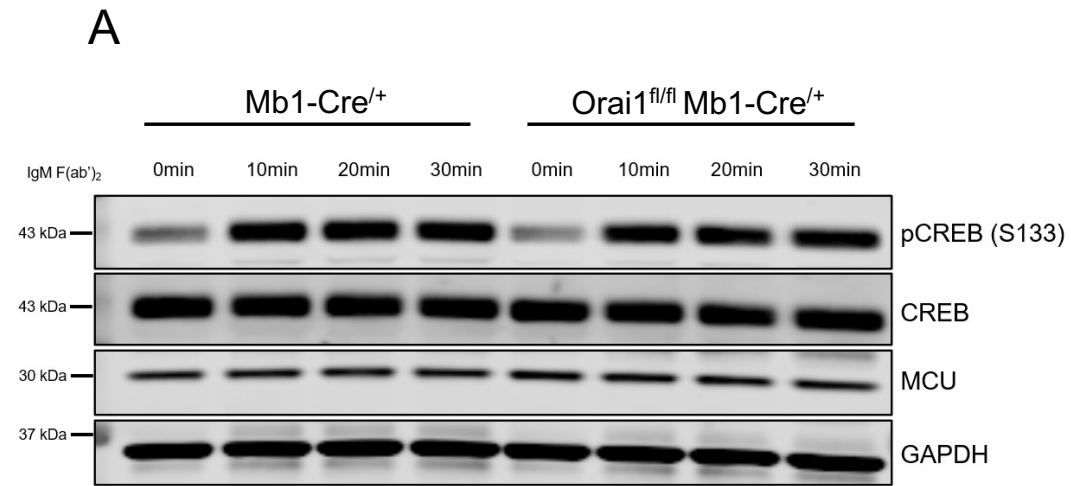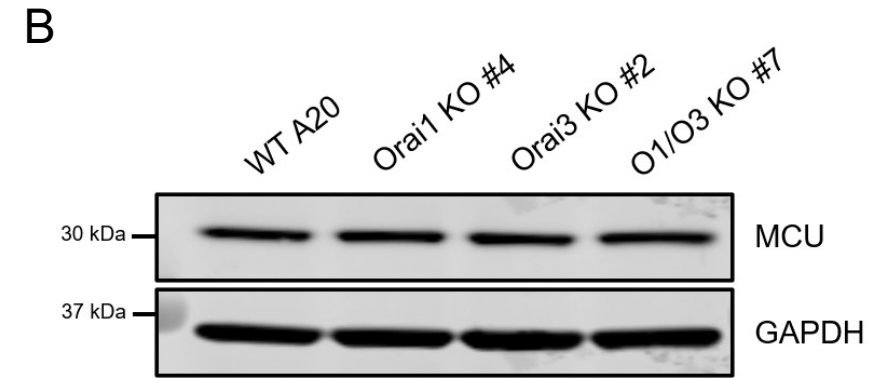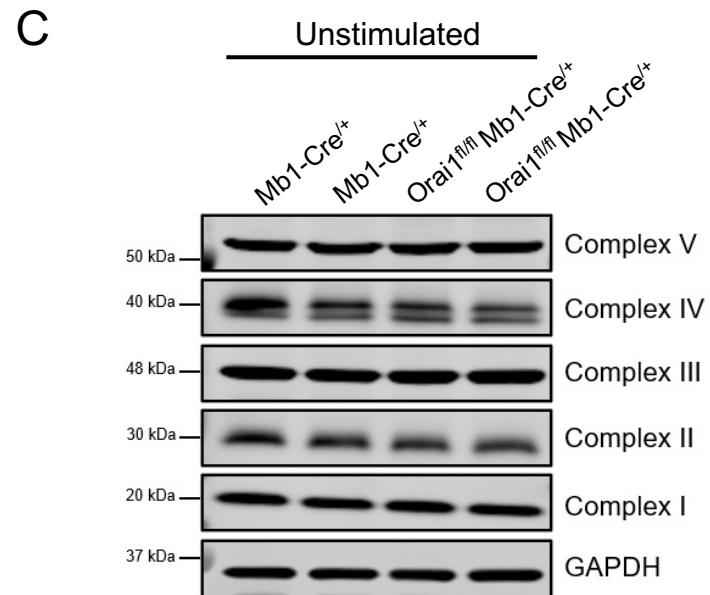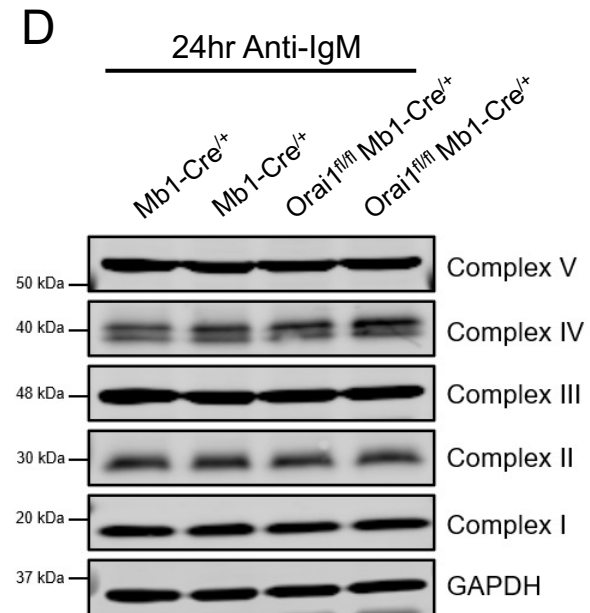

Supplement: supp [file elife-84708-supp-v1.zip]
